# Supplementary material for: Transcriptional Programs and Regulators Underlying Age-Dependent and Dark-Induced Senescence in Medicago truncatula
Source: Cells. 2022 May 6;11(9):1570. doi: 10.3390/cells11091570 (PMC9103780; doi:10.3390/cells11091570)
Supplement: Supplementary file 1 [file cells-11-01570-s001.zip]

Archive with 11 entries (11 files):
- Supplementary Dataset S1. FPKM values of expressed genes during age-dependent and dark-induced senescence.xlsx
- Supplementary Dataset S2. Log2 Fold change values of DE genes during age-dependent senescence.xlsx
- Supplementary Dataset S3.  STEM profiles with Mapman annotations of DE genes during age-dependent senescence.xlsx
- Supplementary Dataset S4. GO terms based on STEM profiles of DE genes during age-dependent senescence.xlsx
- Supplementary Dataset S5. Log2 Fold changes values of DE genes during dark-induced senescence.xlsx
- Supplementary Dataset S6.  STEM profiles with Mapman annotations of DE genes during dark-induced senescence.xlsx
- Supplementary Dataset S7. GO terms based on STEM clusters of DE genes during dark-induced senescence.xlsx
- Supplementary Dataset S8. Comparison of age-dependent and dark-induced senescence transcriptome profiles.xlsx
- Supplementary Table S1. List of primers sequences used in the study.xlsx
- Supplementary Table S2. List of senescence-induced TFs transiently overexpressed in tobacco leaves.xlsx
- Revised Supplementary material_Mahmood et al., cells-1648109.pdf
