# Supplementary material for: Transcriptional Programs and Regulators Underlying Age-Dependent and Dark-Induced Senescence in Medicago truncatula
Source: Cells. 2022 May 6;11(9):1570. doi: 10.3390/cells11091570 (PMC9103780; doi:10.3390/cells11091570)
Supplement: Supplementary file 1 [file cells-11-01570-s001.zip › Revised Supplementary material_Mahmood et al., cells-1648109.pdf]

## Supplementary Material

### Transcriptional programs and regulators underlying age-dependent and dark-induced senescence in *Medicago truncatula*

Kashif Mahmood<sup>1,2</sup>, Ivone Torres-Jerez<sup>1,2</sup>, Nick Krom<sup>1</sup>, Wei Liu<sup>1,3</sup>, Michael K. Udvardi<sup>2,4\*</sup>

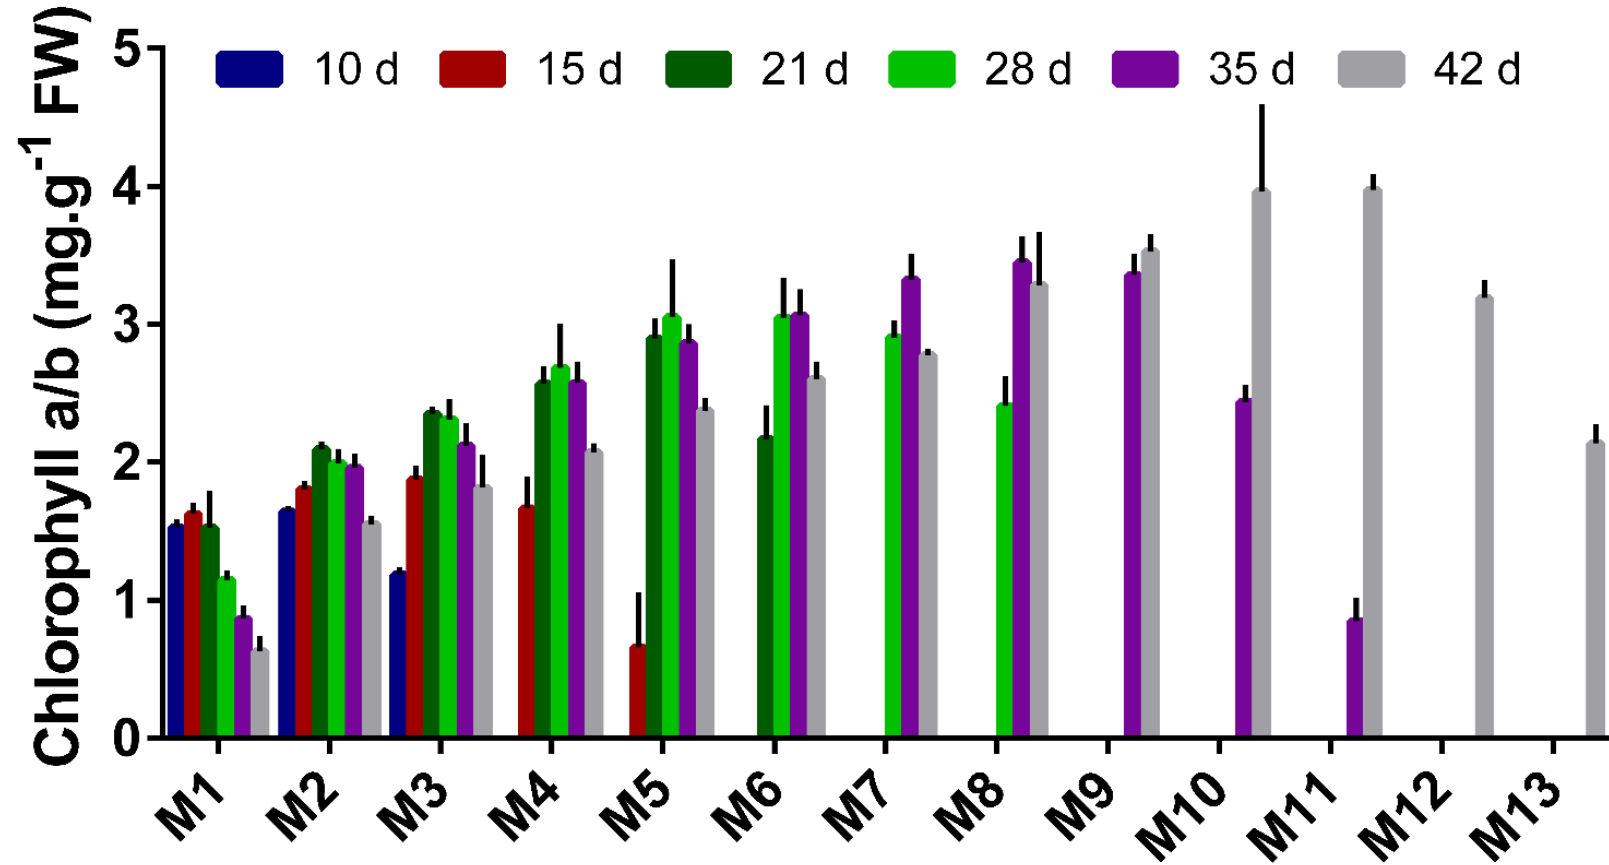

**Figure S1.** Chlorophyll analysis in main metameric leaves of A17. Seedlings of A17 plants were transplanted into soil one day after seed germination and grown for 42 days under long-day growth conditions. All the main metameric leaves were harvested from plants 10, 15, 21, 28, 35 and 42 DAS (pooled from six individual plants as one biological replicate). Chlorophyll was extracted using 80% acetone and absorbance of supernatants were measured spectrophotometrically at 645 nm and 663 nm. Data represent SD $\pm$  mean values from four biological replicates and statistically analyzed using one-way ANOVA.

Profiles ordered based on the p-value significance of number of genes assigned versus expected

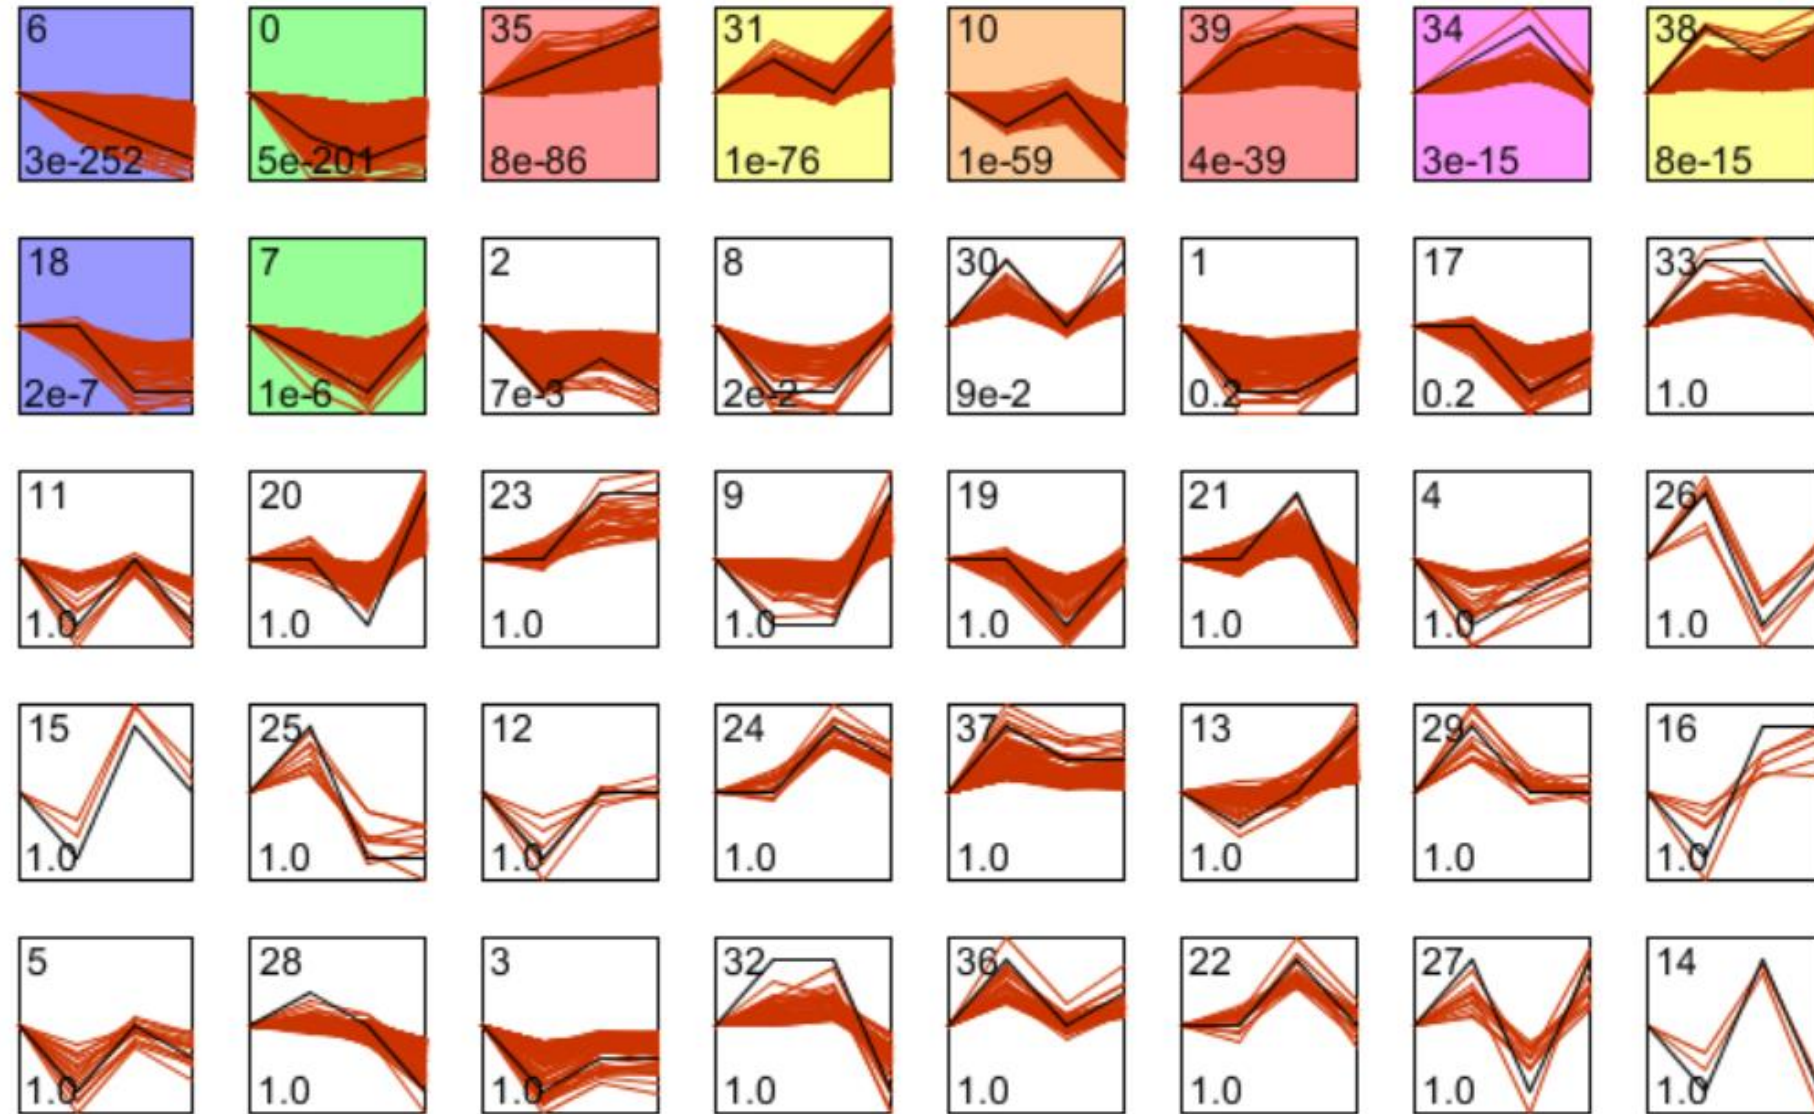

**Figure S2.** STEM analysis of differentially expressed genes identified during age-dependent senescence. Numbers in the top left panel represent gene profiles or clusters and the numbers in the left bottom represent the P values. Profiles with P values  $\leq 0.05$  are considered significant. Analysis was performed using default parameters.

| Profile #                                                                                          | GO term    | P value  | Description                                  |
|----------------------------------------------------------------------------------------------------|------------|----------|----------------------------------------------|
| 0<br>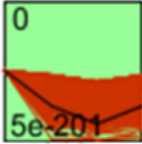<br>5e-201   | GO:0006952 | 3.20E-10 | Defense response                             |
|                                                                                                    | GO:0007154 | 2.00E-07 | Cell communication                           |
|                                                                                                    | GO:0006950 | 1.10E-06 | Response to Stress                           |
|                                                                                                    | GO:0007154 | 2.40E-06 | Signal transduction                          |
| 6<br>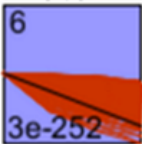<br>3e-252   | GO:0071554 | 2.20E-11 | Cell wall organization/biogenesis            |
|                                                                                                    | GO:0005975 | 4.80E-10 | Carbohydrate metabolic process               |
|                                                                                                    | GO:0009698 | 1.30E-07 | Phenylpropanoid metabolic process            |
|                                                                                                    | GO:0009808 | 1.40E-06 | Lignin metabolic process                     |
| 7<br>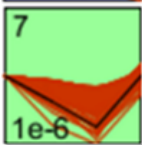<br>1e-6     | GO:1901700 | 3.30E-05 | Response to oxygen-containing compound       |
|                                                                                                    | GO:0009611 | 4.00E-04 | Response to wounding                         |
|                                                                                                    | GO:0009753 | 4.00E-04 | Response to jasmonic acid                    |
|                                                                                                    | GO:0001101 | 5.10E-04 | Response to acid chemical                    |
| 10<br>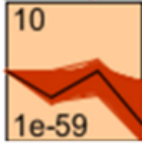<br>1e-59   | GO:0015979 | 4.50E-21 | Photosynthesis                               |
|                                                                                                    | GO:0018298 | 8.60E-11 | Protein-chromophore linkage                  |
|                                                                                                    | GO:0009733 | 2.40E-09 | Response to auxin                            |
|                                                                                                    | GO:0019684 | 3.50E-07 | Photosynthesis, light reaction               |
| 18<br>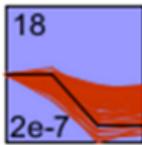<br>2e-7    | GO:0042454 | 4.40E-04 | Cell wall modification                       |
|                                                                                                    | GO:0045490 | 4.80E-04 | Pectin catabolic process                     |
|                                                                                                    | GO:0010393 | 1.10E-03 | Galacturonan metabolic process               |
|                                                                                                    | GO:0045488 | 1.10E-03 | Pectin metabolic process                     |
| 31<br>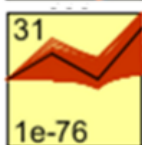<br>1e-76  | GO:0009605 | 1.10E-06 | Response to external stimulus                |
|                                                                                                    | GO:0055114 | 1.90E-05 | Oxidation-reduction process                  |
|                                                                                                    | GO:0031669 | 3.10E-05 | Cellular response to nutrient levels         |
|                                                                                                    | GO:0015698 | 4.10E-05 | Inorganic anion transport                    |
| 34<br>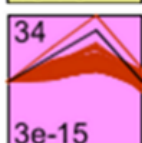<br>3e-15 | GO:1901566 | 5.70E-25 | Organonitrogen compound biosynthetic process |
|                                                                                                    | GO:0006412 | 1.30E-18 | Translation                                  |
|                                                                                                    | GO:0006518 | 3.70E-18 | Peptide metabolic process                    |
|                                                                                                    | GO:0043604 | 1.00E-17 | Amide biosynthesis                           |
| 35<br>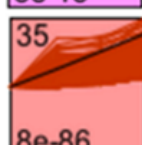<br>8e-86 | GO:0055114 | 5.90E-06 | Oxidation-reduction process                  |
|                                                                                                    | GO:0035337 | 3.20E-04 | Fatty-acyl-CoA metabolic process             |
|                                                                                                    | GO:1900992 | 3.20E-04 | (-)-secologanin metabolic process            |
|                                                                                                    | GO:0098609 | 1.88E-03 | Cell-cell adhesion                           |
| 38<br>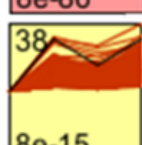<br>8e-15 | GO:0080167 | 4.40E-04 | Response to karrikin                         |
|                                                                                                    | GO:0006636 | 5.10E-04 | Unsaturated fatty acid metabolic process     |
|                                                                                                    | GO:0010466 | 1.27E-03 | Negative regulation of peptidase activity    |
|                                                                                                    | GO:0016567 | 2.40E-03 | Protein ubiquitination                       |
| 39<br>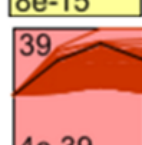<br>4e-39 | GO:0009657 | 4.40E-13 | Plastid organization                         |
|                                                                                                    | GO:0042793 | 4.50E-08 | Transcription from plastid promoter          |
|                                                                                                    | GO:0009451 | 5.30E-07 | RNA modification                             |
|                                                                                                    | GO:0044085 | 2.30E-06 | Cellular component biogenesis                |

**Figure S3.** GO-term enrichment analysis of discrete DE/SAG expression profiles during development senescence. Analysis was performed at <http://plantregmap.gao-lab.org/go.php> ( $P \leq 0.01$ ), and redundant GO terms were removed using REVIGO.

Profiles ordered based on the p-value significance of number of genes assigned versus expected

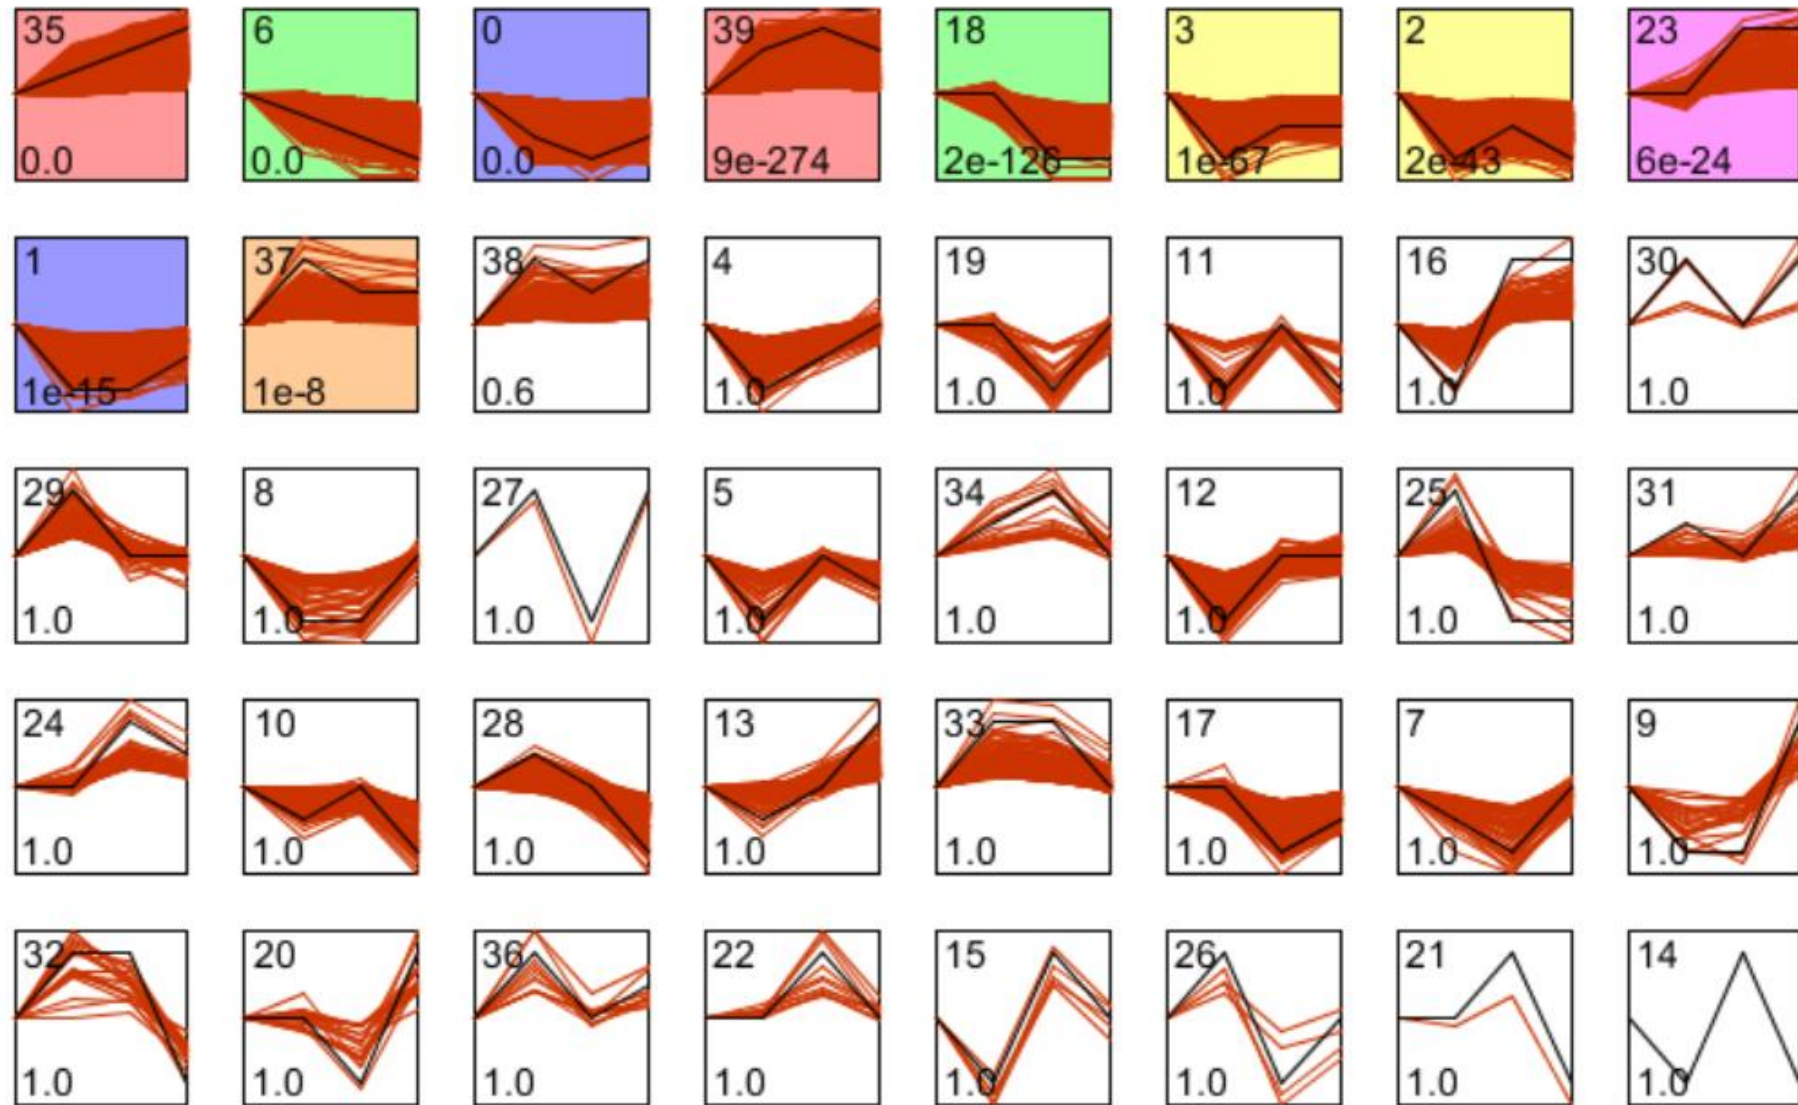

**Figure S4.** STEM analysis of differentially expressed genes identified during dark-induced senescence. Numbers in the top left panel represent gene profiles or clusters and numbers in the left bottom represent the P values. Profiles with P values  $\leq 0.05$  are considered significant. Analysis was performed using default parameters.

| Profile #                                                                           | GO term    | P value  | Description                                    |
|-------------------------------------------------------------------------------------|------------|----------|------------------------------------------------|
| 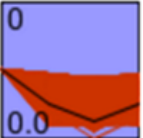   | GO:0044281 | 1.10E-10 | Small molecule metabolic process               |
|                                                                                     | GO:1901564 | 8.90E-10 | Organonitrogen compound metabolic process      |
|                                                                                     | GO:0019752 | 9.50E-10 | Carboxylic acid metabolic process              |
|                                                                                     | GO:0009628 | 1.70E-09 | Response to abiotic stimulus                   |
| 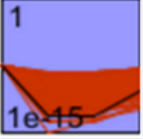   | GO:0006073 | 2.20E-05 | Cellular glucan metabolic process              |
|                                                                                     | GO:0005982 | 3.20E-05 | Starch metabolic process                       |
|                                                                                     | GO:0044264 | 1.10E-07 | Cellular polysaccharide metabolic process      |
|                                                                                     | GO:0010206 | 1.50E-04 | Photosystem II repair                          |
| 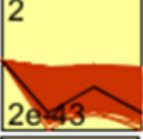   | GO:0015979 | 1.40E-14 | Photosynthesis                                 |
|                                                                                     | GO:0019684 | 2.40E-09 | Photosynthesis, Light reaction                 |
|                                                                                     | GO:0006091 | 8.30E-08 | Generation of precursor metabolites and energy |
|                                                                                     | GO:0009767 | 9.80E-08 | Photosynthetic electron transport chain        |
| 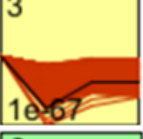   | GO:0044711 | 1.00E-06 | Single-organism biosynthetic process           |
|                                                                                     | GO:0042372 | 2.90E-06 | Phylloquinone biosynthetic process             |
|                                                                                     | GO:0006721 | 5.70E-05 | Terpenoid metabolic process                    |
|                                                                                     | GO:0055114 | 6.40E-05 | Oxidation-reduction process                    |
| 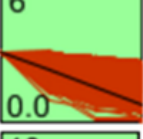   | GO:0043603 | 7.60E-23 | Cellular amide metabolic process               |
|                                                                                     | GO:0006412 | 1.40E-21 | Translation                                    |
|                                                                                     | GO:0009987 | 1.60E-14 | Cellular process                               |
|                                                                                     | GO:0042254 | 2.80E-14 | Ribosome biogenesis                            |
| 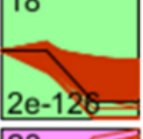  | GO:0016310 | 4.00E-23 | Phosphorylation                                |
|                                                                                     | GO:0006793 | 3.50E-20 | Phosphorus metabolic process                   |
|                                                                                     | GO:0006468 | 1.50E-15 | Protein phosphorylation                        |
|                                                                                     | GO:0036211 | 1.10E-12 | Protein modification                           |
| 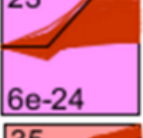 | GO:0055065 | 1.40E-06 | Metal ion homeostasis                          |
|                                                                                     | GO:2000030 | 3.50E-06 | Regulation of response to red or far red light |
|                                                                                     | GO:0098771 | 9.80E-06 | Inorganic ion homeostasis                      |
|                                                                                     | GO:0048878 | 3.80E-05 | Chemical homeostasis                           |
| 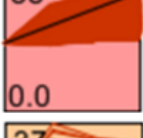 | GO:1901700 | 6.70E-10 | Response to oxygen-containing compound         |
|                                                                                     | GO:0009628 | 8.00E-09 | Response to abiotic stimulus                   |
|                                                                                     | GO:0009737 | 1.00E-08 | Response to abscisic acid                      |
|                                                                                     | GO:0046700 | 6.90E-08 | Heterocycle catabolic process                  |
| 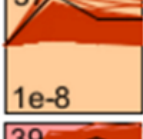 | GO:0006241 | 4.00E-04 | CTP biosynthetic process                       |
|                                                                                     | GO:0009611 | 4.01E-03 | Response to wounding                           |
|                                                                                     | GO:0034728 | 6.53E-03 | Nucleosome assembly                            |
|                                                                                     | GO:0006333 | 7.77E-03 | Chromatin assembly or disassembly              |
| 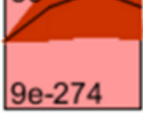 | GO:0016054 | 2.00E-07 | Organic acid catabolic process                 |
|                                                                                     | GO:0046395 | 2.00E-07 | Carboxylic acid catabolic process              |
|                                                                                     | GO:0009083 | 1.80E-06 | Branched-chain amino acid catabolic process    |
|                                                                                     | GO:1901606 | 2.90E-06 | Alpha-amino acid catabolic process             |

**Figure S5.** GO-term enrichment analysis of discrete DE/SAG expression profiles during dark treatment. Analysis was performed at "<http://plantregmap.gao-lab.org/go.php>", and redundant GO terms were removed using REVIGO.

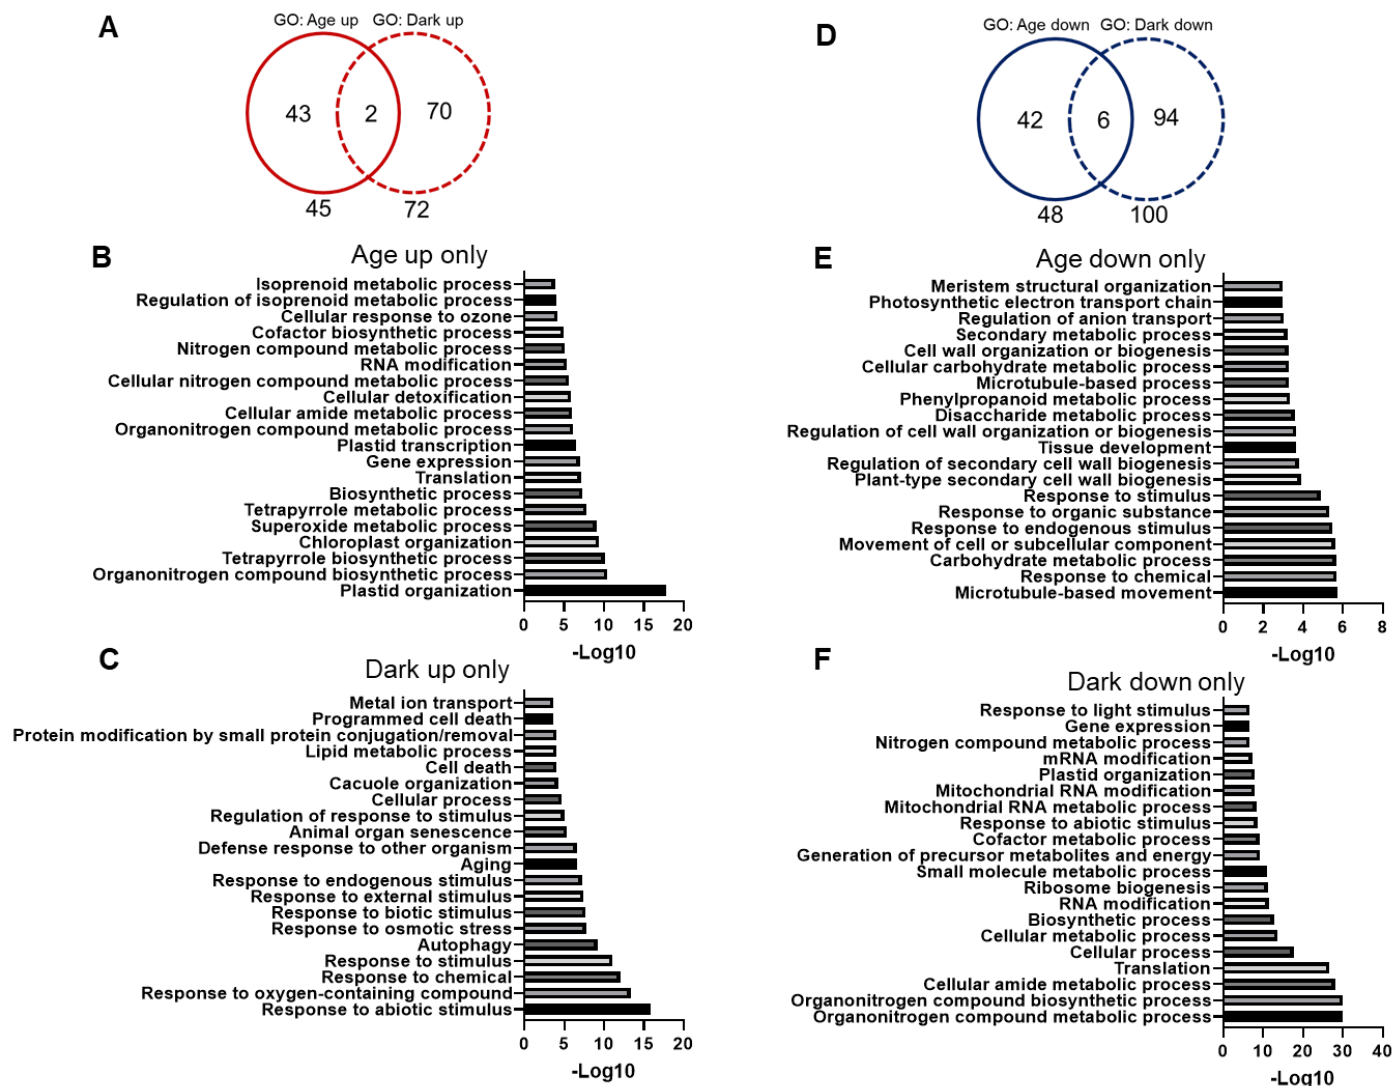

**Figure S6:** Comparison of GO terms specifically associated with age-dependent and dark-induced senescence. (A) Venn-Diagram analysis of the GO terms/biological processes encoded by DE genes that were upregulated during age-dependent (developmental) and dark-induced senescence. (B) Top 20 GO-terms and biological processes encoded by DE genes that were upregulated specifically during age-dependent (developmental) senescence. (C) Top 20 GO-terms and biological processes encoded by DE genes that were upregulated specifically during dark-induced senescence. (D) Venn-Diagram analysis of the GO terms/ biological processes encoded by DE genes that were downregulated during in age-dependent (developmental) and dark-induced senescence. (E) Top 20 GO-terms and biological processes encoded by DE genes that were downregulated specifically during age-dependent (developmental) senescence. (F) Top 20 GO-terms and biological processes encoded by DE genes that were downregulated specifically during dark-induced senescence. Analysis was performed at “<http://plantregmap.gao-lab.org/go.php>”, and redundant GO terms were removed using REVIGO.

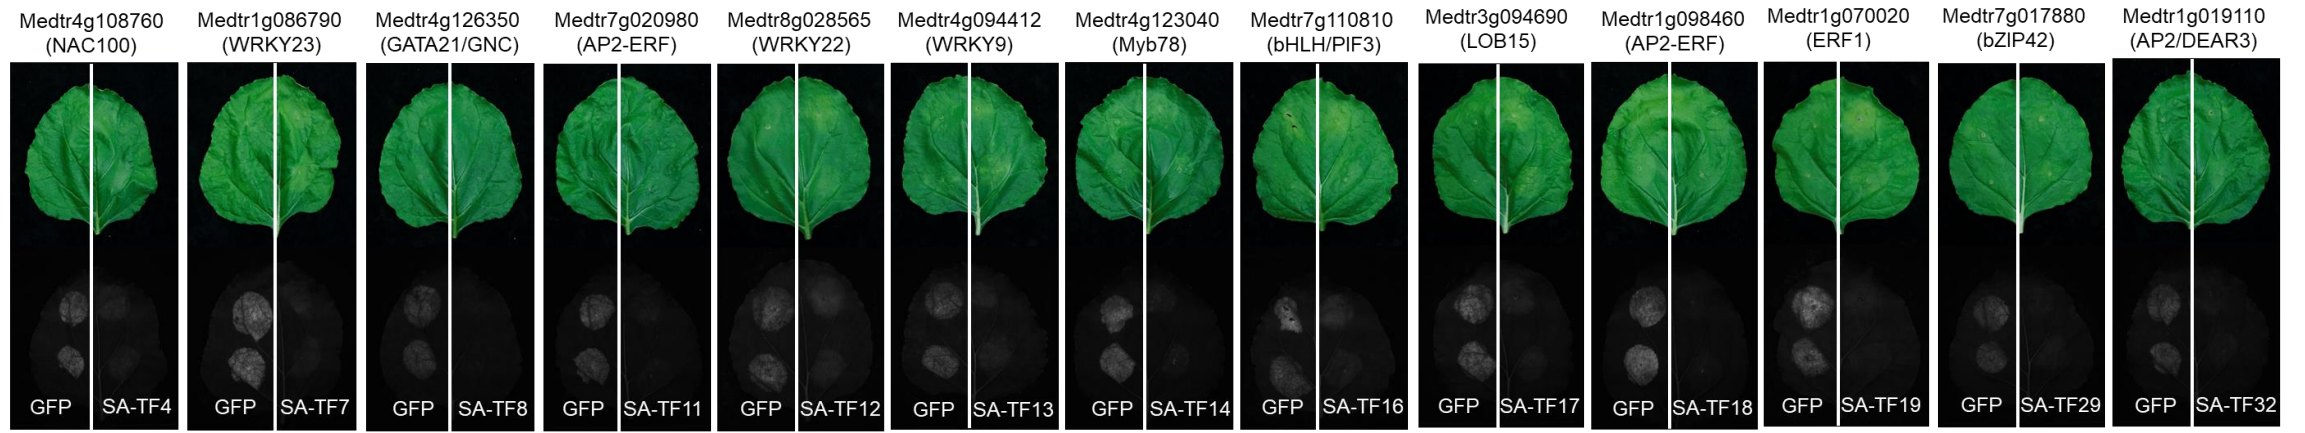

**Figure S7:** Transient overexpression of selected Senescence-associated transcription factors (SA-TFs) in tobacco leaves. SA-TFs that induced no senescence or mild senescence symptoms upon overexpression in tobacco leaves. Coding regions of the selected TFs were cloned in the expression vector under control of the 35S CaMV promoter and expressed in tobacco leaves using *Agrobacterium tumefaciens* (GV2260). Expression of green fluorescent protein (GFP) was used as a positive control for transformation and negative control for senescence induction, again using the 35S CaMV promoter. Plants were phenotyped daily and photographed 6-7 days after inoculation.

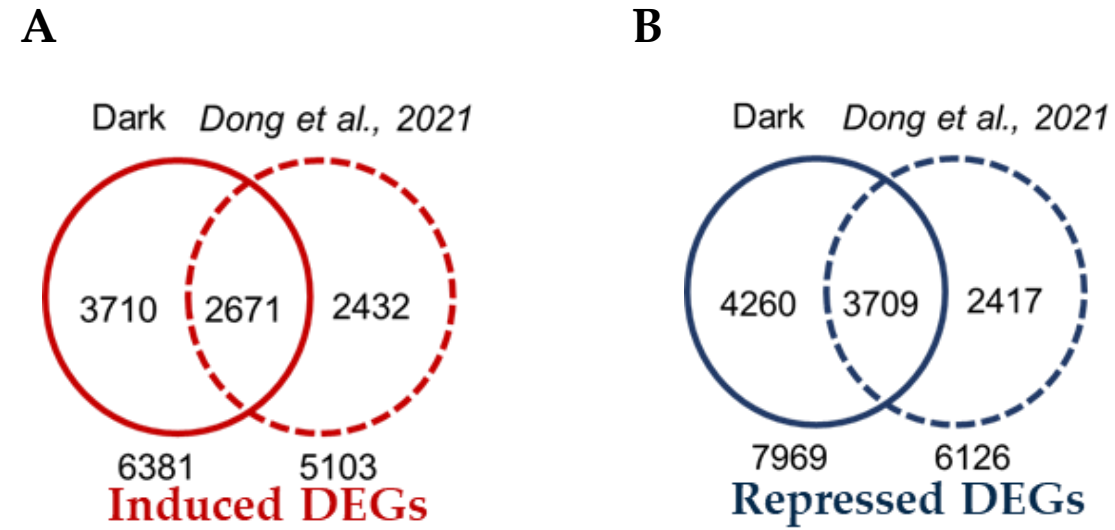

**Supplementary Figure S8.** Comparison of transcriptome data from dark-treated intact plants and dark-treated detached leaves in *M. truncatula*. Venn-diagram showing overlap between (A) induced and (B) repressed differentially expressed genes (DEGs) identified in our dark-induce leaf senescence transcriptome in intact plants and the dark-treated detached leaves reported by Dong *et al.*, 2021.

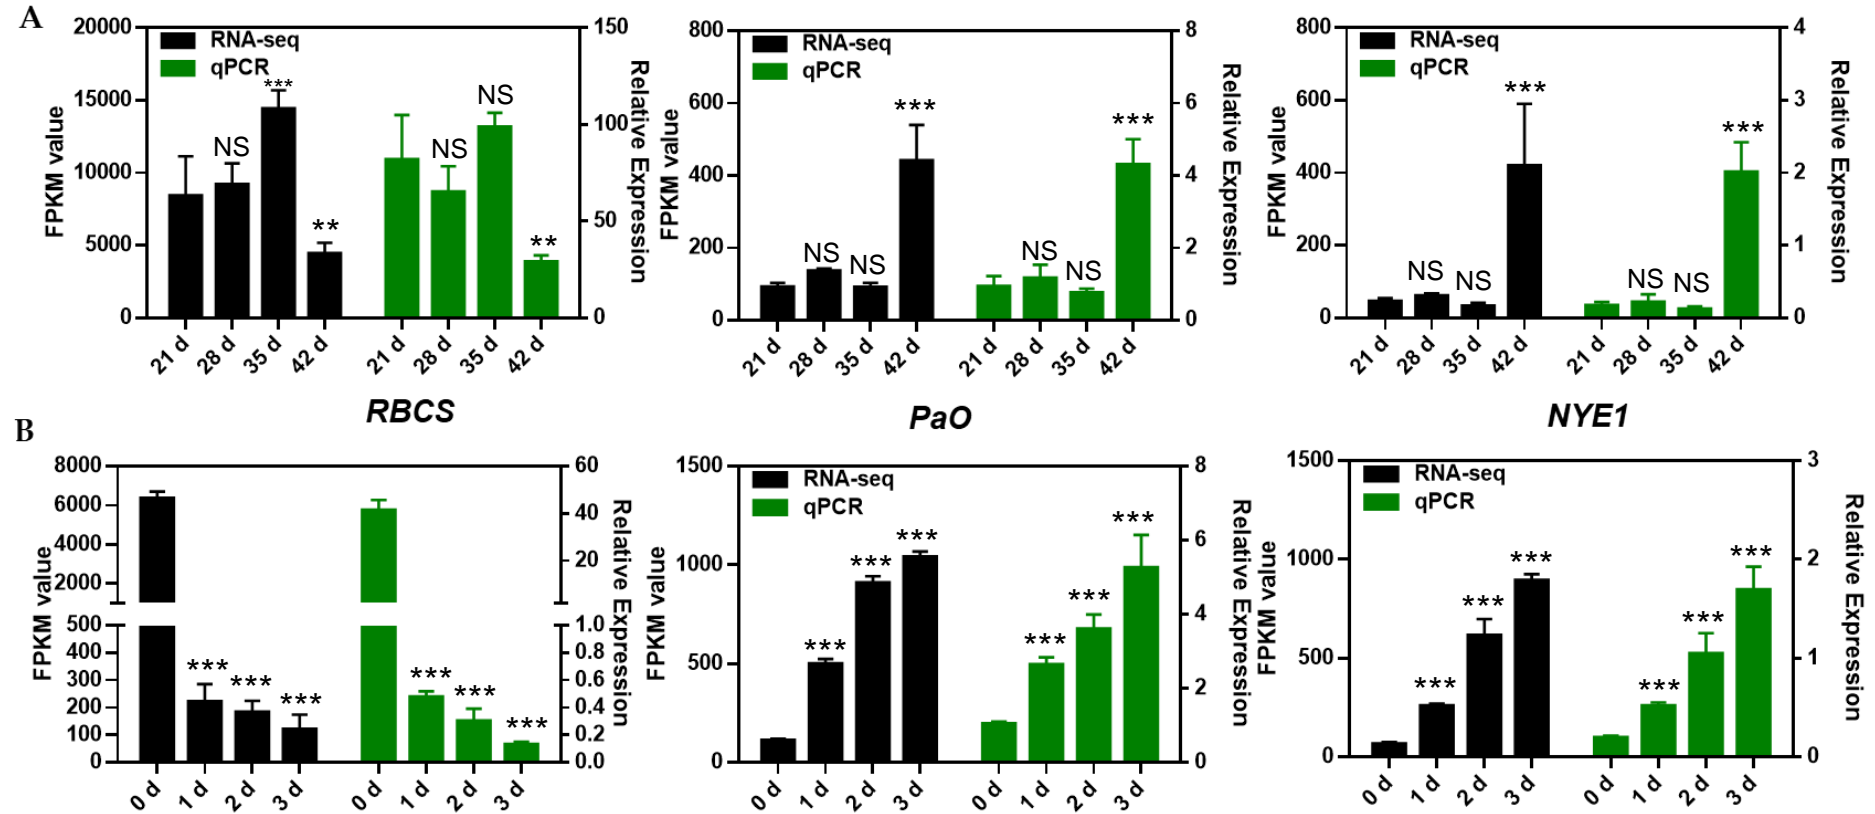

**Figure S9.** Confirmation of RNA-seq data by comparing the expression patterns of the *RBCS*, *PaO* and *NYE1* analyzed by quantitative RT-PCR with the RNA-seq FPKM values representing (A) age-dependent senescence at 21 DAS, 28 DAS, 35 DAS and 42 DAS, and (B) dark-induced senescence at 0 dD, 1 dD, 2 dD and 3 dD. The expression values of the photosynthesis-associated gene (Rubisco Small subunit, *RBCS*) and senescence-associated genes (*NYE-1* and *PaO*), shown in Figure 1C and Figure 4C, were reused here for the comparison since same RNA samples were used in qRT-PCR and RNA-seq analysis. Data in (A) and (B) represent mean values ( $\pm$ SD;  $n = 3$ ), and were analyzed using Student's t-test (NS-Not Significant, \*\* $P < 0.01$ , \*\*\* $P < 0.001$ ).
