# Supplementary material for: Transcriptional Programs and Regulators Underlying Age-Dependent and Dark-Induced Senescence in Medicago truncatula
Source: Cells. 2022 May 6;11(9):1570. doi: 10.3390/cells11091570 (PMC9103780; doi:10.3390/cells11091570)
Supplement: Supplementary file 1 [file cells-11-01570-s001.zip › Supplementary Dataset S1. FPKM values of expressed genes during age-dependent and dark-induced senescence.xlsx]

## Sheet: FMPK values Developmental
Gene ID	Chromosome	Strand	Start	End	21d_R1	21d_R2	21d_R3	28d_R1	28d_R2	28d_R3	35d_R1	35d_R2	35d_R3	42d_R1	42d_R2	42d_R3	Gene description	PFAM domains	PANTHER families	KEGG Orthologous Groups	EC Pathways	KEGG Pathways	Gene Ontology	Arabidopsis hit ID	Arabidopsis hit description
Medtr1g004930	chr1	-	689	7332	0	0	0	0	0	0	0	0	0	0	0	0	hypothetical protein
Medtr1g004990	chr1	+	35910	40554	0.278545	0.319852	0.194862	0.261186	0.199737	0.237263	0.220755	0.140826	0.234095	0.426941	0.558702	0.745565	casein kinase	PF00069(Protein kinase domain)	PTHR11909:SF18(AT15039P-RELATED), PTHR11909(CASEIN KINASE-RELATED)	KOG1163(Casein kinase (serine/threonine/tyrosine protein kinase))			GO:0004672(molecular_function: protein kinase activity), GO:0005524(molecular_function: ATP binding), GO:0006468(biological_process: protein phosphorylation)	AT4G28880.1	casein kinase I-like 3
Medtr1g006490	chr1	+	44430	46280	0.578766	0.510535	0.688336	0.230875	0.104922	0.294495	0.086488	0.320353	0.035801	0.369433	0.217937	0.262061	major intrinsic protein (MIP) family transporter	PF00230(Major intrinsic protein)	PTHR19139(AQUAPORIN TRANSPORTER), PTHR19139:SF51()	KOG0223(Aquaporin (major intrinsic protein family))		K09873(Membrane transport: Transporters [BR:ko02000]: TIP; aquaporin TIP)	GO:0005215(molecular_function: transporter activity), GO:0006810(biological_process: transport), GO:0016020(cellular_component: membrane)	AT2G25810.1	tonoplast intrinsic protein 4;1
Medtr1g006590	chr1	+	46548	50437	0	0	0	0	0	0	0	0	0	0	0	0.095784	tonoplast intrinsic protein	PF00230(Major intrinsic protein)	PTHR19139(AQUAPORIN TRANSPORTER), PTHR19139:SF51()	KOG0223(Aquaporin (major intrinsic protein family))			GO:0005215(molecular_function: transporter activity), GO:0006810(biological_process: transport), GO:0016020(cellular_component: membrane)	AT2G25810.1	tonoplast intrinsic protein 4;1
Medtr1g006600	chr1	+	51361	54977	36.7285	34.3187	29.6795	27.2885	25.4827	29.0084	32.507	29.7013	28.358	30.7946	27.1024	25.7737	exostosin family protein	PF03016(Exostosin family)	PTHR11062(EXOSTOSIN HEPARAN SULFATE GLYCOSYLTRANSFERASE -RELATED), PTHR11062:SF37()	KOG1021(Acetylglucosaminyltransferase EXT1/exostosin 1)				AT5G25820.1	Exostosin family protein
Medtr1g006605	chr1	+	56917	59471	0	0	0	0	0	0	0	0	0	0	0	0	hypothetical protein							AT5G11600.1
Medtr1g006660	chr1	+	70778	71741	0.24738	0.481068	0.514072	0.276802	0.460799	0.428072	0.212642	0.191852	0.598052	0.195953	0.203624	0.012544	AP2 domain class transcription factor	PF00847(AP2 domain)					GO:0003700(molecular_function: sequence-specific DNA binding transcription factor activity), GO:0006355(biological_process: regulation of transcription, DNA-templated)	AT5G11590.1	Integrase-type DNA-binding superfamily protein
MT4Noble_000015	chr1	-	94904	97120	0	0	0	0	0	0	0.0013	0	0	0	0	0	IMP dehydrogenase/GMP reductase, putative
Medtr1g006690	chr1	-	98846	110219	4.60635	5.46427	5.01792	5.30097	6.30335	4.89838	5.87243	5.39877	5.61216	4.53432	5.30032	4.45305	Nup85 nucleoporin protein	PF07575(Nup85 Nucleoporin)	PTHR13373(FROUNT PROTEIN-RELATED), PTHR13373:SF15()					AT4G32910.1
Medtr1g006695	chr1	-	111983	114562	7.12888	6.40261	6.12771	6.70508	7.76019	8.76125	8.0483	8.38927	8.53481	11.5565	13.0277	12.4888	E3 ubiquitin-protein ligase HERC2-like protein	PF00415(Regulator of chromosome condensation (RCC1) repeat)	PTHR22870:SF10(), PTHR22870(REGULATOR OF CHROMOSOME CONDENSATION)	KOG1427(Uncharacterized conserved protein, contains RCC1 domain)				AT5G11580.1	Regulator of chromosome condensation (RCC1) family protein
Medtr1g006650	chr1	+	120398	121915	0	0	0	0	0	0	0	0	0	0	0	0	GATA transcription factor-like protein	PF00320(GATA zinc finger)	PTHR10071:SF113(), PTHR10071(TRANSCRIPTION FACTOR GATA GATA BINDING FACTOR)				GO:0003700(molecular_function: sequence-specific DNA binding transcription factor activity), GO:0008270(molecular_function: zinc ion binding), GO:0043565(molecular_function: sequence-specific DNA binding), GO:0006355(biological_process: regulation of transcription, DNA-templated)	AT5G25830.1	GATA transcription factor 12
Medtr1g006630	chr1	+	125399	125647	0	0	0	0	0	0	0	0	0	0	0	0	hypothetical protein
Medtr1g006620	chr1	-	126518	126895	0	0	0	0	0	0	0	0	0	0	0	0	hypothetical protein
Medtr1g006970	chr1	-	127615	127791	0	0	0	0	0	0	0	0	0	0	0	0.195844	hypothetical protein
Medtr1g006975	chr1	+	129008	136403	0.014208	0.042628	0.04971	0.039893	0.083064	0.024843	0.084733	0.032481	0.008963	0.374651	0.188556	0.589903	disease resistance protein (CC-NBS-LRR class) family protein	PF01849(NAC domain), PF00931(NB-ARC domain)	PTHR21713(NASCENT POLYPEPTIDE ASSOCIATED COMPLEX ALPHA SUBUNIT-RELATED)	KOG4658(Apoptotic ATPase)			GO:0043531(molecular_function: ADP binding)	AT4G27220.1	NB-ARC domain-containing disease resistance protein
Medtr1g006990	chr1	-	138882	141524	0.336119	0.336825	0.417244	0.222593	0.264954	0.22645	0.34349	0.327035	0.153047	0.140805	0.043451	0.173794	subtilisin-like serine endopeptidase family protein	PF00082(Subtilase family), PF05922(Peptidase inhibitor I9)	PTHR10795(PROPROTEIN CONVERTASE SUBTILISIN/KEXIN), PTHR10795:SF17()				GO:0004252(molecular_function: serine-type endopeptidase activity), GO:0006508(biological_process: proteolysis), GO:0042802(molecular_function: identical protein binding), GO:0043086(biological_process: negative regulation of catalytic activity)	AT5G59100.1	Subtilisin-like serine endopeptidase family protein
Medtr1g007020	chr1	-	159169	160593	0.131367	0.084884	0.217556	0.150223	0	0.020166	0.001897	0.215329	0.081724	0.067428	0.412785	0.180175	DUF4283 domain protein
Medtr1g007030	chr1	-	164282	167260	0	0	0	0	0	0.018842	0.000875	0	0.061871	0	0.121231	0	subtilisin-like serine endopeptidase family protein	PF05922(Peptidase inhibitor I9), PF00082(Subtilase family)	PTHR10795(PROPROTEIN CONVERTASE SUBTILISIN/KEXIN), PTHR10795:SF17()				GO:0004252(molecular_function: serine-type endopeptidase activity), GO:0006508(biological_process: proteolysis), GO:0042802(molecular_function: identical protein binding), GO:0043086(biological_process: negative regulation of catalytic activity)	AT5G59100.1	Subtilisin-like serine endopeptidase family protein
Medtr1g007060	chr1	+	171864	178799	7.17282	7.87667	5.70473	8.8524	9.36589	9.3506	9.43657	8.35084	9.9734	8.51463	8.826	10.53	exosome complex exonuclease RRP46	PF01138(3' exoribonuclease family, domain 1)	PTHR11097:SF9(EXOSOME COMPLEX COMPONENT RRP43), PTHR11097(EXOSOME COMPLEX EXONUCLEASE RIBOSOMAL RNA PROCESSING PROTEIN)	KOG1613(Exosomal 3'-5' exoribonuclease complex, subunit Rrp43)		K12586(Folding, sorting and degradation: RNA degradation [PATH:ko03018]: RRP43, EXOSC8, OIP2; exosome complex component RRP43)		AT1G60080.1	3\'-5\'-exoribonuclease family protein
Medtr1g007070	chr1	-	175347	177016	0	0.062566	0	0.084096	0	0	0.022328	0.069723	0	0	0	0	hypothetical protein
Medtr1g007120	chr1	+	184125	190492	6.05201	4.98757	4.13697	6.2625	4.84912	7.25399	6.48156	6.55942	5.97879	7.14155	6.42682	6.26968	thioredoxin-related transmembrane protein, putative		PTHR15853(THIOREDOXIN-RELATED)	KOG0914(Thioredoxin-like protein)				AT5G11640.1	Thioredoxin superfamily protein
Medtr1g007150	chr1	+	198077	203795	32.309	32.3996	29.3463	32.0102	33.5727	31.9207	26.6704	27.918	31.3911	34.6357	32.9909	33.9182	casein kinase I-like protein	PF00069(Protein kinase domain)	PTHR11909(CASEIN KINASE-RELATED), PTHR11909:SF20(CASEIN KINASE I ISOFORM ALPHA)	KOG1164(Casein kinase (serine/threonine/tyrosine protein kinase))			GO:0004672(molecular_function: protein kinase activity), GO:0005524(molecular_function: ATP binding), GO:0006468(biological_process: protein phosphorylation)	AT2G25760.1	Protein kinase family protein
Medtr1g007153	chr1	-	204129	205199	0.054437	0.175578	0.168484	0.321193	0	0.039149	0	0.127023	0	0.092657	0	0	hypothetical protein
Medtr1g007157	chr1	+	204529	205657	0.185467	0.271572	0.083351	0.155085	0.149377	0.035415	0.199865	0.336235	0.463583	0.501617	0.316014	0.162056	hypothetical protein
Medtr1g007160	chr1	-	206900	213875	3.01821	2.60251	2.80787	3.82823	4.27084	3.72608	3.38371	4.11707	4.66659	4.55884	5.97868	7.48362	ATP-dependent protease LA (lon) domain protein	PF02190(ATP-dependent protease La (LON) substrate-binding domain )	PTHR14255(ATP-DEPENDENT PROTEASE CEREBLON)	KOG1400(Predicted ATP-dependent protease PIL, contains LON domain)		K11793(Folding, sorting and degradation: Ubiquitin system [BR:ko04121]: CRBN; cereblon)	GO:0004176(molecular_function: ATP-dependent peptidase activity), GO:0006508(biological_process: proteolysis)	AT2G25740.1	ATP-dependent protease La (LON) domain protein
Medtr1g007165	chr1	+	207284	207629	0	0	0.197443	0.154568	0.06878	0.073214	0.388266	0	0.109148	0	0.008919	0	hypothetical protein
Medtr1g007170	chr1	+	215277	219688	1.80012	1.16083	1.26851	2.21027	2.40456	2.44604	2.1244	2.45604	2.4186	3.22159	3.18926	3.13265	phosphoribosylglycinamide formyltransferase	PF00551(Formyl transferase)	PTHR10520(TRIFUNCTIONAL PURINE BIOSYNTHETIC PROTEIN ADENOSINE-3-RELATED)	KOG3076(5'-phosphoribosylglycinamide formyltransferase)	2.1.2.2(Phosphoribosylglycinamide formyltransferase.)	K00601(Metabolism of cofactors and vitamins: One carbon pool by folate [PATH:ko00670]: E2.1.2.2; phosphoribosylglycinamide formyltransferase)	GO:0016742(molecular_function: hydroxymethyl-, formyl- and related transferase activity), GO:0009058(biological_process: biosynthetic process)	AT1G31220.1	Formyl transferase
Medtr1g007180	chr1	-	220850	224972	57.1483	57.4106	52.5184	59.1639	56.1065	51.1738	49.842	44.1957	46.6074	90.6299	75.969	72.9242	transmembrane amino acid transporter family protein	PF01490(Transmembrane amino acid transporter protein)	PTHR22950(AMINO ACID TRANSPORTER)	KOG1305(Amino acid transporter protein)				AT1G58360.1	amino acid permease 1
Medtr1g007190	chr1	-	226814	227792	0.127527	0	0.198213	0.053099	0.078311	0	0.012187	0.03759	0.053996	0	0.095936	0.171192	transmembrane amino acid transporter family protein	PF01490(Transmembrane amino acid transporter protein)	PTHR22950(AMINO ACID TRANSPORTER)					AT1G58360.1	amino acid permease 1
Medtr1g007195	chr1	+	228462	229903	0	0.067598	0	0	0	0	0	0	0	0	0.247359	0.128472	transmembrane protein, putative
Medtr1g007220	chr1	-	234933	235778	2.49585	3.1643	2.73597	4.00676	3.66963	3.09493	3.95418	3.16475	3.82458	5.55627	3.52422	4.3128	DUF295 family protein	PF03478(Protein of unknown function (DUF295))						AT2G17036.1	F-box family protein with a domain of unknown function (DUF295)
Medtr1g007230	chr1	-	235826	236154	2.3131	2.58338	1.37269	1.91949	3.07111	1.24401	1.91778	3.81421	2.66357	2.7781	3.6191	2.96829	F-box protein, putative							AT2G17036.1	F-box family protein with a domain of unknown function (DUF295)
Medtr1g007240	chr1	+	240957	244142	0.022389	0.030089	0.002414	0.027651	0	0	0	0	0.004588	0.304204	0.04076	0.072518	transmembrane amino acid transporter family protein	PF01490(Transmembrane amino acid transporter protein)	PTHR22950(AMINO ACID TRANSPORTER)	KOG1303(Amino acid transporters)				AT1G58360.1	amino acid permease 1
Medtr1g007260	chr1	+	250502	251671	0.023805	0.07977	0	0.069614	0.144568	0.069866	0.340902	0.110492	0.215235	0.257461	0.167612	0.165364	F-box protein	PF03478(Protein of unknown function (DUF295))						AT2G17030.1	F-box family protein with a domain of unknown function (DUF295)
Medtr1g007270	chr1	+	255917	258926	0.014568	0	0	0	0	0	0	0.016258	0	0	0	0.016951	transmembrane amino acid transporter family protein	PF01490(Transmembrane amino acid transporter protein)	PTHR22950(AMINO ACID TRANSPORTER)	KOG1303(Amino acid transporters)				AT1G10010.1	amino acid permease 8
Medtr1g007290	chr1	+	261026	262655	0	0	0	0	0	0	0	0	0	0	0	0	hypothetical protein	PF02130(Uncharacterized protein family UPF0054)					GO:0004222(molecular_function: metalloendopeptidase activity), GO:0006364(biological_process: rRNA processing)	AT2G25870.1	haloacid dehalogenase-like hydrolase family protein
Medtr1g007300	chr1	-	264988	268696	0	0.002007	0.00071	0	0.00034	0.001029	0	0	0	0	0.001383	0	disease resistance protein (TIR-NBS-LRR class)	PF01582(TIR domain), PF00931(NB-ARC domain)	PTHR11017(LEUCINE-RICH REPEAT-CONTAINING PROTEIN), PTHR11017:SF20(DISEASE RESISTANCE RPP5 LIKE PROTEIN-RELATED)	KOG4658(Apoptotic ATPase)			GO:0043531(molecular_function: ADP binding), GO:0005515(molecular_function: protein binding), GO:0007165(biological_process: signal transduction)	AT5G36930.2	Disease resistance protein (TIR-NBS-LRR class) family
Medtr1g007320	chr1	+	273357	280352	8.15827	8.58394	8.29858	10.6359	10.407	9.65217	10.246	10.4043	10.4539	11.3542	13.5183	14.0537	haloacid dehalogenase-like hydrolase	PF02130(Uncharacterized protein family UPF0054), PF08282(haloacid dehalogenase-like hydrolase)	PTHR10000(PHOSPHOSERINE PHOSPHATASE)			K07042(Translation: Ribosome biogenesis [BR:ko03009]: ybeY, yqfG; probable rRNA maturation factor)	GO:0004222(molecular_function: metalloendopeptidase activity), GO:0006364(biological_process: rRNA processing)	AT2G25870.1	haloacid dehalogenase-like hydrolase family protein
Medtr1g007325	chr1	-	281812	284325	1.78698	1.91623	1.23594	2.90947	1.73238	2.64551	1.94758	2.93171	2.16453	1.66912	2.27183	2.56142	tyrosine-tRNA ligase-like protein	PF00579(tRNA synthetases class I (W and Y))	PTHR11946(ISOLEUCYL, LEUCYL, TYROSYL, VALYL AND METHIONYL-TRNA SYNTHETASES), PTHR11946:SF34()				GO:0000166(molecular_function: nucleotide binding), GO:0004812(molecular_function: aminoacyl-tRNA ligase activity), GO:0005524(molecular_function: ATP binding), GO:0006418(biological_process: tRNA aminoacylation for protein translation)	AT2G33840.1	Tyrosyl-tRNA synthetase, class Ib, bacterial/mitochondrial
Medtr1g007340	chr1	-	284592	290174	1.21174	1.03611	1.54791	1.36404	1.22477	1.2094	1.13206	1.47494	1.03037	1.38411	0.795122	1.41707	tyrosine-tRNA ligase-like protein	PF00579(tRNA synthetases class I (W and Y))	PTHR11946(ISOLEUCYL, LEUCYL, TYROSYL, VALYL AND METHIONYL-TRNA SYNTHETASES), PTHR11946:SF34()	KOG2144(Tyrosyl-tRNA synthetase, cytoplasmic)			GO:0000166(molecular_function: nucleotide binding), GO:0004812(molecular_function: aminoacyl-tRNA ligase activity), GO:0005524(molecular_function: ATP binding), GO:0006418(biological_process: tRNA aminoacylation for protein translation)	AT1G28350.1	Nucleotidylyl transferase superfamily protein
Medtr1g007360	chr1	-	301574	305370	11.1702	13.9366	12.4111	13.1936	11.4335	12.5437	10.9036	9.3403	11.0439	14.9756	13.5112	15.3077	early nodulin 93	PF03386(Early nodulin 93 ENOD93 protein)						AT5G25940.1	early nodulin-related
Medtr1g007370	chr1	-	306478	310765	28.9365	29.5644	29.6586	37.7204	32.4809	42.3538	34.493	34.9986	38.5731	35.2531	35.828	34.2135	RNA polymerase sigma factor	PF04542(Sigma-70 region 2 )					GO:0003677(molecular_function: DNA binding), GO:0003700(molecular_function: sequence-specific DNA binding transcription factor activity), GO:0016987(molecular_function: sigma factor activity), GO:0006352(biological_process: DNA-templated transcription, initiation), GO:0006355(biological_process: regulation of transcription, DNA-templated)	AT3G53920.1	RNApolymerase sigma-subunit C
Medtr1g007380	chr1	-	311854	315988	43.8598	52.9591	44.2442	34.684	37.9099	38.8775	39.4562	27.5368	17.6067	66.641	64.0731	108.849	transmembrane amino acid transporter family protein	PF01490(Transmembrane amino acid transporter protein)	PTHR22950(AMINO ACID TRANSPORTER)	KOG1303(Amino acid transporters)				AT5G49630.1	amino acid permease 6
Medtr1g007385	chr1	-	324335	324631	0.925199	0.788853	0.721358	0.685288	0.938287	0.719269	0.567452	0.50293	0.9272	0.827583	0.954875	1.04801	hypothetical protein
Medtr1g007390	chr1	+	326268	334078	7.9956	8.25802	6.75598	7.41917	6.71177	6.98999	7.11713	6.9546	6.36952	8.5087	7.95947	10.3905	auxin-independent growth promoter-like protein	PF10250(GDP-fucose protein O-fucosyltransferase)						AT3G03810.1	O-fucosyltransferase family protein
Medtr1g007400	chr1	+	336657	339784	0	0	0	0	0	0	0	0	0	0	0.013772	0	hypothetical protein
Medtr1g007420	chr1	+	346727	359190	2.04534	2.40419	1.52393	2.48868	2.71617	3.01251	2.55077	2.23656	2.10845	2.3653	2.38672	2.67021	serine esterase family protein, putative	PF05057(Putative serine esterase (DUF676)), PF12394(Protein of unknown function (DUF3657) )	PTHR12482(UNCHARACTERIZED)	KOG2205(Uncharacterized conserved protein)				AT1G58350.1	Putative serine esterase family protein
Medtr1g007440	chr1	-	365848	366241	0	0	0	0	0	0	0	0.119331	0	0	0	0	alkaline-phosphatase family protein, putative							AT4G29680.1	Alkaline-phosphatase-like family protein
Medtr1g007450	chr1	+	367877	369839	0	0.028588	0	0	0	0	0	0	0	0	0.032837	0	F-box protein interaction domain protein	PF07734(F-box associated)						AT3G06240.1	F-box family protein
Medtr1g007460	chr1	-	375738	381884	5.67156	5.36992	6.1168	4.90672	5.82316	4.75862	4.37173	5.98231	5.5608	5.94886	5.34672	5.08092	hypothetical protein							AT5G05240.1	Uncharacterised conserved protein (UCP030365)
Medtr1g007480	chr1	+	390537	394034	7.75324	6.54982	5.74714	8.64466	8.72525	8.65999	9.55698	8.54944	11.1604	8.24372	8.38642	7.6783	ribosomal protein L28	PF00830(Ribosomal L28 family)	PTHR13528(39S RIBOSOMAL PROTEIN L28, MITOCHONDRIAL)	KOG3278(Mitochondrial/chloroplast ribosomal protein L28)			GO:0003735(molecular_function: structural constituent of ribosome), GO:0006412(biological_process: translation), GO:0005622(cellular_component: intracellular), GO:0005840(cellular_component: ribosome)	AT4G31460.1	Ribosomal L28 family
Medtr1g007490	chr1	+	395594	399425	30.0884	24.1836	22.2176	57.7665	54.7505	51.2705	60.4946	64.1313	62.2264	45.8771	44.3815	42.748	hypothetical protein							AT5G48470.1
MT4Noble_000072	chr1	-	399887	400120	2.05699	3.01126	2.11331	1.74679	1.40878	1.73018	2.27051	1.36199	2.70817	1.32386	1.28231	1.21967	OPT family oligopeptide transporter | PF03169 OPT oligopeptide transporter protein
MT4Noble_000073	chr1	-	407565	407798	0	0.030726	0.006379	0	0	0	0.00363	0	0.012702	0	0	0	OPT family oligopeptide transporter | PF03169 OPT oligopeptide transporter protein
Medtr1g007510	chr1	+	413021	417854	0	0	0	0	0.008399	0	0	0	0	0	0	0	DNA polymerase theta-like protein	PF00271(Helicase conserved C-terminal domain)	PTHR11752:SF3(), PTHR11752()				GO:0003676(molecular_function: nucleic acid binding), GO:0004386(molecular_function: helicase activity), GO:0005524(molecular_function: ATP binding)	AT4G32700.2	helicases;ATP-dependent helicases;nucleic acid binding;ATP binding;DNA-directed DNA polymerases;DNA binding
Medtr1g007520	chr1	-	419203	421087	0	0.045372	0.026392	0.022857	0.069563	0.006826	0.027718	0.045317	0	0	0.101195	0	dehydration-responsive protein RD22	PF03181(BURP domain)						AT5G25610.1	BURP domain-containing protein
Medtr1g007540	chr1	-	425661	428859	0.284798	0.284159	0.224886	0.118309	0.095882	0.087824	0.241602	0.214856	0.275025	0.130692	0.030152	0.047311	OPT family oligopeptide transporter	PF03169(OPT oligopeptide transporter protein)					GO:0055085(biological_process: transmembrane transport)	AT5G53550.1	YELLOW STRIPE like 3
Medtr1g007580	chr1	-	437876	442182	0.079919	0.020043	0.000771	0.034951	0	0.050983	0.070715	0.0647	0.062042	0.058676	0.052517	0.023423	OPT family oligopeptide transporter	PF03169(OPT oligopeptide transporter protein)					GO:0055085(biological_process: transmembrane transport)	AT5G53550.1	YELLOW STRIPE like 3
Medtr1g007590	chr1	-	444327	448550	18.9757	19.0086	18.9332	20.3166	21.0777	18.8641	18.4323	19.6624	21.041	19.5464	17.4073	18.9127	Rab GTPase activator	PF00566(Rab-GTPase-TBC domain)	PTHR22957(TBC1 DOMAIN FAMILY MEMBER GTPASE-ACTIVATING PROTEIN), PTHR22957:SF31()	KOG2197(Ypt/Rab-specific GTPase-activating protein GYP7 and related proteins)			GO:0005097(), GO:0032313()	AT3G49350.1	Ypt/Rab-GAP domain of gyp1p superfamily protein
Medtr1g007600	chr1	-	449631	452191	0.873118	0.820265	0.687757	0.875663	1.04045	1.08534	1.17872	1.06307	1.15379	0.952226	0.897168	0.97575	pentatricopeptide (PPR) repeat protein	PF01535(PPR repeat)	PTHR24015(FAMILY NOT NAMED)					AT2G13600.1	Pentatricopeptide repeat (PPR) superfamily protein
Medtr1g007610	chr1	+	453448	455881	1.14884	1.08836	1.02373	1.55125	1.82325	2.03732	2.31135	2.01669	1.98377	1.84057	1.22616	1.46133	pentatricopeptide (PPR) repeat protein	PF01535(PPR repeat)	PTHR24015(FAMILY NOT NAMED)					AT3G24000.1	Tetratricopeptide repeat (TPR)-like superfamily protein
Medtr1g007620	chr1	+	456109	456372	0	0	0	0	0	0	0	0	0	0	0	0	hypothetical protein
Medtr1g007630	chr1	-	461057	470041	1.64741	1.73446	1.98656	1.2671	2.05372	1.72916	1.73993	1.32218	1.8609	0.526505	1.03247	0.853686	TLC ATP/ADP transporter							AT5G05310.2	TLC ATP/ADP transporter
Medtr1g007640	chr1	+	472208	476611	4.26821	4.07005	4.093	6.53646	6.54571	5.1589	7.90265	8.17849	7.31464	5.02276	5.28018	4.72449	appr-1-P processing enzyme family protein	PF01661(Macro domain)	PTHR11106(GANGLIOSIDE INDUCED DIFFERENTIATION ASSOCIATED PROTEIN 2-RELATED), PTHR11106:SF41()	KOG2633(Hismacro and SEC14 domain-containing proteins)				AT2G40600.1	appr-1-p processing enzyme family protein
Medtr1g007650	chr1	+	477307	479589	0	0	0	0	0	0	0	0	0	0	0	0	hypothetical protein
Medtr1g007670	chr1	+	488273	491588	0	0	0	0	0	0	0.031203	0	0	0	0	0	histone-lysine N-methyltransferase ATXR6-like protein	PF00628(PHD-finger), PF00856(SET domain)	PTHR10615:SF20(), PTHR10615(HISTONE ACETYLTRANSFERASE)				GO:0005515(molecular_function: protein binding)	AT5G24330.1	ARABIDOPSIS TRITHORAX-RELATED PROTEIN 6
MT4Noble_000091	chr1	+	492552	495126	0	0	0	0	0	0	0.010647	0	0	0	0	0	Histone-lysine N-methyltransferase ATXR6
Medtr1g007690	chr1	+	493397	496317	0	0	0	0	0	0	0.035476	0	0	0	0	0	histone-lysine N-methyltransferase ATXR5, putative							AT5G24330.1	ARABIDOPSIS TRITHORAX-RELATED PROTEIN 6
Medtr1g007700	chr1	+	498003	503498	0.843111	0.823359	0.819824	1.68728	1.26772	1.91852	1.39933	1.18849	1.35338	1.6487	1.26631	1.61967	histone-lysine N-methyltransferase ATXR6, putative	PF00628(PHD-finger)	PTHR10615:SF20(), PTHR10615(HISTONE ACETYLTRANSFERASE)				GO:0005515(molecular_function: protein binding)	AT5G24330.1	ARABIDOPSIS TRITHORAX-RELATED PROTEIN 6
Medtr1g007740	chr1	+	529208	533085	9.42381	11.0175	11.4829	7.81113	9.39703	8.20135	6.47349	6.81985	6.91862	8.69739	7.73951	8.21805	transducin/WD40 repeat protein	PF00400(WD domain, G-beta repeat)	PTHR14221(WD REPEAT DOMAIN 44)	KOG0283(WD40 repeat-containing protein)			GO:0005515(molecular_function: protein binding)	AT5G24320.1	Transducin/WD40 repeat-like superfamily protein
Medtr1g007800	chr1	-	563999	568578	7.29887	12.6833	9.59311	7.35339	10.1779	7.266	4.81005	6.46882	6.05503	8.06601	8.42467	10.3824	enoyl-(acyl carrier) reductase	PF00106(short chain dehydrogenase)	PTHR24322:SF58(), PTHR24322(FAMILY NOT NAMED)	KOG0725(Reductases with broad range of substrate specificities)			GO:0016491(molecular_function: oxidoreductase activity), GO:0008152(biological_process: metabolic process)	AT3G01980.1	NAD(P)-binding Rossmann-fold superfamily protein
Medtr1g007810	chr1	+	575699	577522	0	0	0.245413	0	0	0	0	0	0	0	0	0	glycoside hydrolase family 17 protein	PF00332(Glycosyl hydrolases family 17)	PTHR16631(FAMILY NOT NAMED)				GO:0004553(molecular_function: hydrolase activity, hydrolyzing O-glycosyl compounds), GO:0005975(biological_process: carbohydrate metabolic process)	AT5G24318.1	O-Glycosyl hydrolases family 17 protein
Medtr1g007830	chr1	+	581887	584794	0	0	0	0.079591	0.224723	0.131696	0.118305	0	0.184706	0.337466	0.402124	1.01985	calcium-binding EF-hand protein		PTHR10827(RETICULOCALBIN), PTHR10827:SF13()	KOG4223(Reticulocalbin, calumenin, DNA supercoiling factor, and related Ca2+-binding proteins of the CREC family (EF-Hand protein superfamily))				AT4G27790.1	Calcium-binding EF hand family protein
Medtr1g007840	chr1	+	589317	592263	69.9673	91.3855	76.1014	69.6775	103.062	65.1133	51.8367	51.4945	68.5874	164.049	158.211	172.049	transmembrane protein, putative							AT2G46550.2
Medtr1g007850	chr1	-	592949	593829	0.269949	0.175139	0	0.378843	0.758862	0.169646	0.159152	0.101373	0.072314	0.630287	0.54526	0.602521	photosystem II reaction center protein H	PF00737(Photosystem II 10 kDa phosphoprotein)					GO:0042301(molecular_function: phosphate ion binding), GO:0015979(biological_process: photosynthesis), GO:0050821(biological_process: protein stabilization), GO:0009523(cellular_component: photosystem II), GO:0016020(cellular_component: membrane)	ATCG00710.1	photosystem II reaction center protein H
Medtr1g007860	chr1	+	595273	602175	9.23692	20.5586	20.217	10.347	12.4325	9.58252	9.82181	10.276	9.43132	9.47724	10.7632	13.4558	alpha/beta fold hydrolase	PF00561(alpha/beta hydrolase fold)	PTHR10992(ALPHA/BETA HYDROLASE FOLD-CONTAINING PROTEIN), PTHR10992:SF11()	KOG4178(Soluble epoxide hydrolase)				AT5G53050.2	alpha/beta-Hydrolases superfamily protein
Medtr1g007870	chr1	+	604727	606101	29.0508	24.7556	22.6779	39.4783	35.3434	41.8889	35.9189	36.897	33.8592	23.8265	37.1701	21.9697	transcription factor Pcc1	PF09341(Transcription factor Pcc1)						AT5G53045.1
Medtr1g007880	chr1	-	606935	609028	0.136278	0.176026	0.347177	0.231039	0.051951	0.298582	0.137662	0.39418	0.229637	0.26228	0.856788	1.584	ABIL1-like protein							AT5G24310.1	ABL interactor-like protein 3
Medtr1g007905	chr1	-	616468	618841	21.6524	25.792	14.4564	25.9481	30.8719	30.0454	13.6674	13.633	14.7175	28.1538	39.4196	55.3069	hypothetical protein							AT5G53030.1
Medtr1g007920	chr1	-	623232	627735	1.82641	2.50187	3.15844	1.56517	0.988741	1.45939	0.669419	1.22835	0.827334	0.80959	1.04117	1.43517	IQ calmodulin-binding motif protein	PF00612(IQ calmodulin-binding motif)	PTHR13140(MYOSIN), PTHR13140:SF84()				GO:0005515(molecular_function: protein binding)	AT3G49260.3	IQ-domain 21
Medtr1g007950	chr1	+	645692	653483	0.13723	0.106325	0.022733	0.048978	0.031844	0.028296	0.011816	0	0	0	0	0.056026	gamma-irradiation and mitomycin C induced protein, putative							AT5G24280.1	gamma-irradiation and mitomycin c induced 1
Medtr1g007990	chr1	+	656620	665586	0.090366	0.057771	0.184189	0.028348	0.064617	0.04149	0.024365	0.029192	0.10914	0.04943	0.040242	0.079657	gamma-irradiation and mitomycin C induced protein							AT5G24280.1	gamma-irradiation and mitomycin c induced 1
Medtr1g008000	chr1	+	668789	669722	0	0	0	0	0	0	0	0	0.014615	0	0	0	F-box associated protein	PF07734(F-box associated)
Medtr1g008050	chr1	+	683455	698554	0.116592	0.171053	0.150536	0.230077	0.403466	0.308721	0.333031	0.257784	0.207694	0.191392	0.202052	0.101852	gamma-irradiation and mitomycin C induced protein, putative							AT5G24280.1	gamma-irradiation and mitomycin c induced 1
Medtr1g008060	chr1	+	708137	717726	2.71882	2.83164	2.48816	2.57559	3.18999	3.91668	2.37712	1.99438	2.88338	1.61963	1.57026	1.75496	transcription factor jumonji (JmjC) domain protein, putative	PF08879(WRC), PF02373(JmjC domain, hydroxylase)	PTHR12549:SF1(), PTHR12549(JMJC DOMAIN-CONTAINING HISTONE DEMETHYLATION PROTEIN)	KOG1356(Putative transcription factor 5qNCA, contains JmjC domain)			GO:0005515(molecular_function: protein binding)	AT4G00990.1	Transcription factor jumonji (jmjC) domain-containing protein
Medtr1g008090	chr1	-	722183	723135	0	0	0	0	0	0	0	0	0	0	0	0	hypothetical protein							AT1G49290.1
Medtr1g008120	chr1	+	732376	737785	18.3978	18.193	16.5987	21.478	20.0927	21.4775	18.6399	20.3518	22.0392	19.8064	20.7627	23.3123	ubiquitin ligase SINAT3	PF03145(Seven in absentia protein family)	PTHR10315(SEVEN IN ABSENTIA HOMOLOG)	KOG3002(Zn finger protein)	6.3.2.19(Ubiquitin--protein ligase.)	K04506(Cell growth and death: p53 signaling pathway [PATH:ko04115]: SIAH1; E3 ubiquitin-protein ligase SIAH1)	GO:0006511(biological_process: ubiquitin-dependent protein catabolic process), GO:0007275(biological_process: multicellular organismal development), GO:0005634(cellular_component: nucleus)	AT3G61790.1	Protein with RING/U-box and TRAF-like domains
Medtr1g008140	chr1	-	744520	748436	5.18782	4.59322	5.7198	2.46574	3.0876	3.51979	1.71891	2.16478	1.24792	1.88807	1.61013	1.67309	pectinesterase/pectinesterase inhibitor	PF01095(Pectinesterase), PF04043(Plant invertase/pectin methylesterase inhibitor)	PTHR22931:SF5(), PTHR22931(PHOSPHOENOLPYRUVATE DIKINASE-RELATED)				GO:0030599(molecular_function: pectinesterase activity), GO:0042545(biological_process: cell wall modification), GO:0005618(cellular_component: cell wall), GO:0004857(molecular_function: enzyme inhibitor activity)	AT5G53370.1	pectin methylesterase PCR fragment F
Medtr1g008160	chr1	+	763273	768724	1.12019	1.50889	2.14214	0.418022	0.53893	0.505096	0.438475	0.373243	0.353384	0.34919	0.371055	0.375354	O-acyltransferase (WSD1-like) family protein	PF03007(Wax ester synthase-like Acyl-CoA acyltransferase domain), PF06974(Protein of unknown function (DUF1298))					GO:0004144(molecular_function: diacylglycerol O-acyltransferase activity), GO:0045017(biological_process: glycerolipid biosynthetic process)	AT5G53390.1	O-acyltransferase (WSD1-like) family protein
Medtr1g008170	chr1	-	769625	772406	0.10126	0.06098	0.041817	0.013141	0.042012	0	0	0	0	0.107335	0.142478	0	nuclear movement family protein	PF04969(CS domain)	PTHR12356(NUCLEAR MOVEMENT PROTEIN NUDC)	KOG2265(Nuclear distribution protein NUDC)				AT5G53400.1	HSP20-like chaperones superfamily protein
Medtr1g008195	chr1	+	779215	781348	0.011587	0.120608	0.005319	0.142445	0.014598	0.202552	0.005724	0.009211	0	0.107346	0.127336	0.009234	nuclear movement family protein	PF04969(CS domain)	PTHR12356(NUCLEAR MOVEMENT PROTEIN NUDC)	KOG2265(Nuclear distribution protein NUDC)				AT5G53400.1	HSP20-like chaperones superfamily protein
Medtr1g008200	chr1	+	783312	786579	34.2096	35.6405	28.338	38.2918	35.8365	33.5162	35.1032	33.1888	35.4451	39.3694	42.3082	37.0893	nuclear movement family protein	PF04969(CS domain)	PTHR12356(NUCLEAR MOVEMENT PROTEIN NUDC)	KOG2265(Nuclear distribution protein NUDC)				AT5G53400.1	HSP20-like chaperones superfamily protein
Medtr1g008220	chr1	+	804510	809146	32.1856	29.9858	28.31	40.9911	31.6664	39.5352	28.2471	29.6943	36.852	35.9362	26.9776	32.9493	CCT motif protein							AT5G53420.1	CCT motif family protein
Medtr1g008230	chr1	+	813490	824184	8.6055	8.08807	6.92063	7.57935	8.17624	7.3898	6.64111	6.47354	7.6882	8.31398	7.5373	8.77387	histone-lysine N-methyltransferase ATX3	PF00628(PHD-finger), PF00856(SET domain)	PTHR13793:SF5(HISTONE-LYSINE N-METHYLTRANSFERASE ATX4-RELATED), PTHR13793(PHD FINGER PROTEINS)	KOG1080(Histone H3 (Lys4) methyltransferase complex, subunit SET1 and related methyltransferases)			GO:0005515(molecular_function: protein binding)	AT5G53430.1	SET domain group 29
Medtr1g008240	chr1	+	825317	829126	0	0	0	0	0	0	0	0	0	0	0	0	NB-ARC domain disease resistance protein	PF00931(NB-ARC domain)	PTHR23155(LEUCINE-RICH REPEAT-CONTAINING PROTEIN), PTHR23155:SF236()	KOG4658(Apoptotic ATPase)			GO:0043531(molecular_function: ADP binding)	AT3G14470.1	NB-ARC domain-containing disease resistance protein
Medtr1g008250	chr1	+	830311	830751	0	0.021272	0	0	0	0.018972	0	0	0	0	0.004803	0	histone-lysine N-methyltransferase ATX3		PTHR25475:SF5(), PTHR25475()					AT5G53430.1	SET domain group 29
Medtr1g008280	chr1	-	836416	842304	41.0204	39.91	37.7214	26.8817	29.2144	27.5504	36.4402	25.0058	26.4851	25.0716	24.6006	23.3219	signal peptide peptidase-like protein	PF04258(Signal peptide peptidase)	PTHR12174(SIGNAL PEPTIDE PEPTIDASE), PTHR12174:SF23(MINOR HISTOCOMPATIBILITY ANTIGEN H13)	KOG2443(Uncharacterized conserved protein)			GO:0004190(molecular_function: aspartic-type endopeptidase activity), GO:0016021(cellular_component: integral component of membrane)	AT2G03120.1	signal peptide peptidase
Medtr1g008290	chr1	-	845508	846205	0	0.013866	0	0	0	0.017567	0	0	0	0	0	0	FAR-RED impaired response-like protein	PF03101(FAR1 DNA-binding domain)						AT4G15090.1	FRS (FAR1 Related Sequences) transcription factor family
Medtr1g008300	chr1	+	846306	849646	2.88525	2.50907	3.54627	6.09246	6.56943	4.82106	7.2634	7.32609	7.03206	3.60164	4.07751	4.02251	rhomboid protease YdcA-like protein, putative	PF01694(Rhomboid family)	PTHR22936(RHOMBOID-RELATED)				GO:0004252(molecular_function: serine-type endopeptidase activity), GO:0016021(cellular_component: integral component of membrane)	AT5G25752.1	rhomboid-like protein 11
Medtr1g008310	chr1	-	850741	854624	10.7715	8.79917	9.47041	18.3778	15.1647	15.8249	17.1515	16.5683	15.8217	14.7206	13.8727	13.3954	PPR containing plant-like protein	PF01535(PPR repeat)	PTHR24015(FAMILY NOT NAMED)					AT5G25630.1	Tetratricopeptide repeat (TPR)-like superfamily protein
Medtr1g008330	chr1	-	858338	858643	0	0	0	0.246241	0	0	0	0.339594	0	0	0	0	transmembrane protein, putative
Medtr1g008350	chr1	+	861041	865731	9.55612	10.2556	7.97787	10.4152	8.65478	10.553	9.23016	9.85163	10.3772	12.1143	12.2411	13.014	peroxisomal membrane 22 kDa (Mpv17/PMP22) family protein	PF04117(Mpv17 / PMP22 family )	PTHR11266(PEROXISOMAL MEMBRANE PROTEIN 2, PXMP2 MPV17)	KOG1944(Peroxisomal membrane protein MPV17 and related proteins)			GO:0016021(cellular_component: integral component of membrane)	AT3G24570.1	Peroxisomal membrane 22 kDa (Mpv17/PMP22) family protein
Medtr1g008360	chr1	-	866590	869072	2.32929	2.20876	1.96641	2.56136	2.20863	2.46152	2.88564	2.94809	2.09463	2.9021	2.96297	3.18461	PPR containing plant-like protein	PF01535(PPR repeat)	PTHR24015(FAMILY NOT NAMED)					AT4G39620.2	Tetratricopeptide repeat (TPR)-like superfamily protein
Medtr1g008370	chr1	+	869612	879303	7.69093	6.67632	6.67481	7.68905	7.93961	7.53616	8.00846	7.74091	8.29813	7.35604	8.48728	6.79411	diphthamide biosynthesis protein	PF01866(Putative diphthamide synthesis protein)	PTHR10762(DIPHTHAMIDE BIOSYNTHESIS PROTEIN), PTHR10762:SF2(DIPHTHAMIDE BIOSYNTHESIS PROTEIN 2)	KOG2648(Diphthamide biosynthesis protein)			GO:0017183(biological_process: peptidyl-diphthamide biosynthetic process from peptidyl-histidine), GO:0005737(cellular_component: cytoplasm)	AT3G59630.1	diphthamide synthesis DPH2 family protein
Medtr1g008380	chr1	-	883915	889499	0.989202	0.784493	1.01682	1.53029	2.2748	2.53698	0.783704	0.989868	1.47832	0.946845	1.37132	0.994412	indole-3-pyruvate monooxygenase	PF00743(Flavin-binding monooxygenase-like)	PTHR23023:SF5(), PTHR23023(DIMETHYLANILINE MONOOXYGENASE)	KOG1399(Flavin-containing monooxygenase)	1.14.13.-()	K11816(Amino acid metabolism: Tryptophan metabolism [PATH:ko00380]: YUCCA; indole-3-pyruvate monooxygenase)	GO:0004499(molecular_function: N,N-dimethylaniline monooxygenase activity), GO:0050660(molecular_function: flavin adenine dinucleotide binding), GO:0050661(molecular_function: NADP binding), GO:0055114(biological_process: oxidation-reduction process)	AT5G25620.1	Flavin-binding monooxygenase family protein
Medtr1g008420	chr1	+	900363	902018	0.024366	0	0	0	0	0	0	0	0	0	0	0	BURP domain protein	PF03181(BURP domain)						AT5G25610.1	BURP domain-containing protein
Medtr1g008450	chr1	+	908671	910315	0.016944	0	0	0.03182	0	0	0	0.038724	0.076998	0	0	0	dehydration-responsive protein RD22	PF03181(BURP domain)						AT5G25610.1	BURP domain-containing protein
Medtr1g008470	chr1	+	923318	924651	0	0	0	0	0	0	0	0	0	0	0	0	dehydration-responsive protein RD22	PF03181(BURP domain)						AT5G25610.1	BURP domain-containing protein
Medtr1g008500	chr1	+	934387	937180	70.3983	73.0967	59.4594	31.1795	34.844	42.5321	23.5066	24.0391	17.9263	15.4456	16.6509	16.5752	dehydration-responsive protein RD22	PF03181(BURP domain)						AT5G25610.1	BURP domain-containing protein
Medtr1g008510	chr1	+	940984	942794	0	0.00592	0	0	0	0	0	0	0	0	0	0	dehydration-responsive protein RD22	PF03181(BURP domain)						AT5G25610.1	BURP domain-containing protein
MT4Noble_000147	chr1	+	941139	941372	0	0	0	0	0	0	0	0	0	0	0	0	Dehydration-responsive protein RD22
Medtr1g008530	chr1	+	948978	949783	0	0.004302	0	0	0	0	0	0	0	0	0	0	dehydration-responsive RD22-like protein	PF03181(BURP domain)						AT5G25610.1	BURP domain-containing protein
Medtr1g008560	chr1	+	959394	960755	0	0	0	0.03826	0	0	0	0	0	0	0	0	dehydration-responsive protein RD22	PF03181(BURP domain)						AT5G25610.1	BURP domain-containing protein
MT4Noble_000151	chr1	+	967399	967679	0	0	0	0	0	0	0	0	0	0	0	0	Dehydration-responsive protein RD22
Medtr1g008580	chr1	+	971546	972064	0	0	0	0	0	0	0	0	0	0	0	0	dehydration-responsive RD22-like protein	PF03181(BURP domain)						AT5G25610.1	BURP domain-containing protein
Medtr1g008590	chr1	+	973945	976004	0.114373	0.591844	0.455793	0.302628	1.04132	0.128462	0.1348	0.745922	0.176478	0.090608	0.983048	0.288957	dehydration-responsive protein RD22	PF03181(BURP domain)						AT5G25610.1	BURP domain-containing protein
Medtr1g008600	chr1	-	976147	991547	0.867843	0.804944	0.901161	0.654037	0.603824	0.562114	0.477039	0.408434	0.50792	0.528399	0.282702	0.482383	ATP-binding; ATP-dependent helicase; DNA helicase	PF00271(Helicase conserved C-terminal domain), PF00476(DNA polymerase family A), PF00270(DEAD/DEAH box helicase)	PTHR11752:SF3(), PTHR11752()	KOG0950(DNA polymerase theta/eta, DEAD-box superfamily)	2.7.7.7(DNA-directed DNA polymerase.)	K02349(Replication and repair: DNA repair and recombination proteins [BR:ko03400]: POLQ; DNA polymerase theta)	GO:0003676(molecular_function: nucleic acid binding), GO:0005524(molecular_function: ATP binding), GO:0008026(molecular_function: ATP-dependent helicase activity), GO:0004386(molecular_function: helicase activity), GO:0003677(molecular_function: DNA binding), GO:0003887(molecular_function: DNA-directed DNA polymerase activity), GO:0006260(biological_process: DNA replication)	AT4G32700.2	helicases;ATP-dependent helicases;nucleic acid binding;ATP binding;DNA-directed DNA polymerases;DNA binding
Medtr1g008610	chr1	+	993930	996385	10.6194	10.0245	7.81797	11.9626	13.4632	11.2027	11.4469	9.5725	11.6582	14.2387	14.6459	12.8697	bromo-adjacent-like (BAH) domain protein	PF01426(BAH domain)					GO:0003682(molecular_function: chromatin binding)	AT5G11470.1	bromo-adjacent homology (BAH) domain-containing protein
MT4Noble_000156	chr1	+	997261	1000413	0	0.059333	0	0.005193	0	0	0	0	0	0	0	0
Medtr1g008620	chr1	-	997642	998514	0.061268	0.295383	0.389457	0.332145	0.289488	0.04827	0.2039	0.009565	0.105663	0	0.194383	0	transmembrane protein, putative							AT5G48920.1	tracheary element differentiation-related 7
Medtr1g008670	chr1	+	1017438	1021635	4.77305	4.30277	4.79922	5.49173	6.00982	4.25186	4.57904	4.79175	4.69673	4.19456	6.2934	5.16495	bromo-adjacent-like (BAH) domain protein	PF01426(BAH domain)					GO:0003682(molecular_function: chromatin binding)	AT5G11470.1	bromo-adjacent homology (BAH) domain-containing protein
Medtr1g008675	chr1	-	1021643	1022692	2.41014	2.23348	3.40817	2.12889	2.10394	1.98089	0.854185	1.67464	1.11219	2.11477	1.34412	1.124	transmembrane protein, putative							AT1G43790.1	tracheary element differentiation-related 6
Medtr1g008700	chr1	+	1027028	1030563	11.2891	10.5065	11.6464	11.8809	10.8492	12.9377	12.6438	12.3372	10.0706	10.8049	14.1764	11.5344	2-on-2 hemoglobin	PF01152(Bacterial-like globin)					GO:0019825(molecular_function: oxygen binding)	AT4G32690.1	hemoglobin 3
Medtr1g008710	chr1	+	1033569	1034013	0	0.262653	0.102575	0.054092	0	0	0.122407	0	0	0.192615	0	0.027843	calcium-dependent lipid-binding-like protein							AT1G48090.1	calcium-dependent lipid-binding family protein
Medtr1g008740	chr1	+	1057858	1061279	0	0	0.031963	0.025601	0	0	0	0.031156	0	0.042383	0	0	NAC transcription factor-like protein	PF02365(No apical meristem (NAM) protein)					GO:0003677(molecular_function: DNA binding), GO:0006355(biological_process: regulation of transcription, DNA-templated)	AT2G24430.1	NAC domain containing protein 38
Medtr1g008885	chr1	-	1077998	1079424	0	0	0	0	0	0	0	0	0	0	0	0	hypothetical protein
Medtr1g008900	chr1	+	1086535	1087384	0	0	0	0	0.082893	0	0	0	0	0	0	0	hypothetical protein							AT5G09840.1	Putative endonuclease or glycosyl hydrolase
Medtr1g008980	chr1	+	1119784	1129267	35.9101	46.2995	34.2358	19.0729	24.0766	23.0416	16.5275	15.9812	17.958	19.5745	21.7894	21.8114	ABC1 family protein	PF03109(ABC1 family), PF00144(Beta-lactamase), PF06176(Lipopolysaccharide core biosynthesis protein (WaaY))	PTHR10566:SF10(SUBFAMILY NOT NAMED), PTHR10566(CHAPERONE-ACTIVITY OF BC1 COMPLEX CABC1 -RELATED)	KOG1235(Predicted unusual protein kinase)		K08869(Enzyme families: Protein kinases [BR:ko01001]: ADCK, ABC1; aarF domain-containing kinase)	GO:0009244(biological_process: lipopolysaccharide core region biosynthetic process)	AT5G24810.1	ABC1 family protein
Medtr1g008990	chr1	-	1129608	1135125	4.27513	5.27909	5.57632	4.93149	4.29626	5.8228	3.88715	4.01703	4.83296	9.1537	7.47872	9.41955	BZIP transcription factor	PF00170(bZIP transcription factor)	PTHR22952:SF6(), PTHR22952(CAMP-RESPONSE ELEMENT BINDING PROTEIN-RELATED)				GO:0003700(molecular_function: sequence-specific DNA binding transcription factor activity), GO:0043565(molecular_function: sequence-specific DNA binding), GO:0006355(biological_process: regulation of transcription, DNA-templated)	AT5G24800.1	basic leucine zipper 9
Medtr1g009010	chr1	-	1141945	1145771	16.5911	14.8918	14.9879	17.2807	17.9327	16.9999	17.6476	17.9109	15.8685	18.1503	18.4521	19.0615	26S proteasome non-ATPase regulatory subunit-like protein	PF01399(PCI domain)	PTHR10678(26S PROTEASOME NON-ATPASE REGULATORY SUBUNIT 11/COP9 SIGNALOSOME COMPLEX SUBUNIT 2)	KOG1463(26S proteasome regulatory complex, subunit RPN6/PSMD11)		K03036(Infectious diseases: Epstein-Barr virus infection [PATH:ko05169]: PSMD11, RPN6; 26S proteasome regulatory subunit N6)	GO:0005515(molecular_function: protein binding)	AT1G29150.1	non-ATPase subunit 9
Medtr1g009030	chr1	-	1149419	1151070	4.98778	7.09774	5.97979	3.10163	4.79301	4.56513	2.18736	2.77376	1.60721	9.95458	10.454	17.8891	plant/F12B17-70 protein	PF04654(Protein of unknown function, DUF599)						AT4G31330.1	Protein of unknown function, DUF599
Medtr1g009150	chr1	-	1196660	1197427	0	0	0	0	0	0	0	0	0	0	0	0	SAUR-like auxin-responsive family protein	PF02519(Auxin responsive protein)				K14488(Signal transduction: Plant hormone signal transduction [PATH:ko04075]: SAUR; SAUR family protein)		AT4G31320.1	SAUR-like auxin-responsive protein family
Medtr1g009155	chr1	+	1200939	1201529	0	0	0	0	0.007151	0	0	0	0	0	0	0	cation transporter ChaC							AT4G31290.1	ChaC-like family protein
Medtr1g009170	chr1	-	1201921	1203399	0	0	0	0.026502	0	0	0	0	0	0	0	0.001927	peptide/nitrate transporter	PF00854(POT family)	PTHR11654:SF57(), PTHR11654(OLIGOPEPTIDE TRANSPORTER-RELATED)				GO:0005215(molecular_function: transporter activity), GO:0006810(biological_process: transport), GO:0016020(cellular_component: membrane)	AT1G52190.1	Major facilitator superfamily protein
MT4Noble_000187	chr1	+	1202362	1203417	0	0	0	0	0	0	0	0	0	0	0	0
Medtr1g009180	chr1	+	1203658	1205237	0.149854	0.030067	0.464747	0.082615	0.205946	0.184293	0	0.096718	0.066863	0.130803	0.122326	0.239792	nucleotide-diphospho-sugar transferase-like protein	PF09258(Glycosyl transferase family 64 domain)	PTHR11062(EXOSTOSIN HEPARAN SULFATE GLYCOSYLTRANSFERASE -RELATED), PTHR11062:SF3()				GO:0016758(molecular_function: transferase activity, transferring hexosyl groups), GO:0031227(cellular_component: intrinsic component of endoplasmic reticulum membrane)	AT1G80290.2	Nucleotide-diphospho-sugar transferases superfamily protein
Medtr1g009190	chr1	+	1208841	1219722	25.0314	27.4805	31.3041	48.8371	53.4787	34.2085	25.0185	31.3946	40.0044	58.6387	47.7033	57.9164	arabinose kinase-like protein	PF00288(GHMP kinases N terminal domain), PF10509(Galactokinase galactose-binding signature)	PTHR10457(MEVALONATE KINASE/GALACTOKINASE), PTHR10457:SF6(GALACTOKINASE)	KOG0631(Galactokinase)	2.7.1.46(L-arabinokinase.)	K12446(Carbohydrate metabolism: Amino sugar and nucleotide sugar metabolism [PATH:ko00520]: E2.7.1.46; L-arabinokinase)	GO:0005524(molecular_function: ATP binding)	AT4G16130.1	arabinose kinase
Medtr1g009200	chr1	+	1220841	1224095	22.4299	21.3216	19.2359	28.0878	28.0706	29.5532	28.5109	25.7261	26.1327	25.8522	28.3056	23.6069	peptide/nitrate transporter plant	PF00854(POT family)	PTHR11654:SF57(), PTHR11654(OLIGOPEPTIDE TRANSPORTER-RELATED)	KOG1237(H+/oligopeptide symporter)			GO:0005215(molecular_function: transporter activity), GO:0006810(biological_process: transport), GO:0016020(cellular_component: membrane)	AT1G52190.1	Major facilitator superfamily protein
Medtr1g009210	chr1	-	1224296	1226347	0	0	0	0	0	0	0	0	0.367389	0	0	0.118391	cation transporter ChaC	PF04752(ChaC-like protein)	PTHR12192(CATION TRANSPORT PROTEIN CHAC-RELATED)	KOG3182(Predicted cation transporter)				AT4G31290.1	ChaC-like family protein
Medtr1g009220	chr1	+	1232040	1235577	3.42292	2.96859	2.72057	3.38002	3.23158	4.10729	2.25063	3.63422	3.14451	3.42	3.3995	3.68122	Myb/SANT-like DNA-binding domain protein							AT4G31270.1	sequence-specific DNA binding transcription factors
Medtr1g009230	chr1	-	1238758	1241261	3.68786	2.75195	3.58657	3.38183	2.65665	4.15979	1.69566	3.51148	2.98577	3.68649	2.45574	3.99814	extracellular ligand-gated ion channel protein	PF12056(Protein of unknown function (DUF3537))						AT2G21080.1
Medtr1g009260	chr1	+	1250760	1251509	1.03375	0.830703	1.57362	1.36393	1.40415	1.92501	1.01271	1.08614	1.2775	2.0326	2.07891	2.48626	hypothetical protein
Medtr1g009270	chr1	+	1253486	1256331	0.694465	1.05201	1.3044	0.768095	0.290798	0.483331	0.411395	0.585701	0.157225	0.598652	0.422624	0.243747	LRR receptor-like kinase	PF00560(Leucine Rich Repeat), PF08263(Leucine rich repeat N-terminal domain), PF00069(Protein kinase domain)	PTHR24420(), PTHR24420:SF738()	KOG1187(Serine/threonine protein kinase)			GO:0004672(molecular_function: protein kinase activity), GO:0005524(molecular_function: ATP binding), GO:0006468(biological_process: protein phosphorylation), GO:0005515(molecular_function: protein binding)	AT4G31250.1	Leucine-rich repeat protein kinase family protein
MT4Noble_000198	chr1	+	1262567	1264778	0	0	0	0.047789	0	0	0	0	0	0	0	0
Medtr1g009310	chr1	+	1268905	1275264	0	0	0	0	0	0	0	0	0	0	0	0	adenine nucleotide alpha hydrolase-like domain kinase	PF00582(Universal stress protein family), PF00069(Protein kinase domain)	PTHR24420(), PTHR24420:SF203()	KOG1187(Serine/threonine protein kinase)			GO:0004672(molecular_function: protein kinase activity), GO:0005524(molecular_function: ATP binding), GO:0006468(biological_process: protein phosphorylation), GO:0006950(biological_process: response to stress)	AT2G24370.1	Protein kinase protein with adenine nucleotide alpha hydrolases-like domain
Medtr1g009315	chr1	-	1275993	1296395	6.49705	8.11275	6.42197	13.4538	12.3918	10.7961	9.79299	10.7768	10.2133	8.13793	8.24837	7.61863	DNA topoisomerase I, bacterial protein	PF01131(DNA topoisomerase), PF01396(Topoisomerase DNA binding C4 zinc finger), PF01751(Toprim domain)	PTHR11390(PROKARYOTIC DNA TOPOISOMERASE)	KOG1956(DNA topoisomerase III alpha)			GO:0003677(molecular_function: DNA binding), GO:0003916(molecular_function: DNA topoisomerase activity), GO:0006265(biological_process: DNA topological change), GO:0005694(cellular_component: chromosome)	AT4G31210.1	DNA topoisomerase, type IA, core
Medtr1g009570	chr1	-	1299615	1314837	0.935294	1.27624	0.620865	1.99355	1.94438	1.78173	1.66178	2.20983	1.93644	2.69927	2.63841	3.47117	DNA topoisomerase I, bacterial protein	PF01751(Toprim domain), PF01396(Topoisomerase DNA binding C4 zinc finger), PF01131(DNA topoisomerase)	PTHR11390(PROKARYOTIC DNA TOPOISOMERASE)	KOG1956(DNA topoisomerase III alpha)			GO:0003677(molecular_function: DNA binding), GO:0003916(molecular_function: DNA topoisomerase activity), GO:0006265(biological_process: DNA topological change), GO:0005694(cellular_component: chromosome)	AT4G31210.1	DNA topoisomerase, type IA, core
Medtr1g009600	chr1	+	1326040	1328412	0.006126	0	0.02503	0.018724	0.033218	0	0	0	0.022655	0.031853	0.077377	0.04891	rhamnose biosynthetic-like enzyme	PF01370(NAD dependent epimerase/dehydratase family), PF04321(RmlD substrate binding domain)	PTHR10366(NAD DEPENDENT EPIMERASE/DEHYDRATASE), PTHR10366:SF2()	KOG0747(Putative NAD+-dependent epimerases)			GO:0003824(molecular_function: catalytic activity), GO:0050662(molecular_function: coenzyme binding), GO:0044237(biological_process: cellular metabolic process), GO:0008831(molecular_function: dTDP-4-dehydrorhamnose reductase activity), GO:0045226(biological_process: extracellular polysaccharide biosynthetic process)	AT1G78570.1	rhamnose biosynthesis 1
Medtr1g009610	chr1	-	1329522	1342298	8.93614	10.281	8.98838	6.60425	7.63896	6.75393	3.70602	4.75754	6.78459	7.39828	5.96093	8.1224	viral A-type inclusion protein, putative							AT1G24460.2
Medtr1g009420	chr1	+	1347598	1351585	0	0.004448	0.001334	0	0.001331	0	0	0	0.001237	0	0.001506	0.002594	transmembrane protein, putative
Medtr1g009410	chr1	-	1355662	1355886	0	0	0	0	0	0	0	0	0	0	0	0	transmembrane protein, putative
Medtr1g009613	chr1	+	1360197	1362833	19.2905	22.9086	16.1733	19.4672	23.9482	20.475	14.4249	15.8943	17.2135	17.6004	25.9755	29.4248	WRKY family transcription factor	PF03106(WRKY DNA -binding domain), PF10533(Plant zinc cluster domain)					GO:0003700(molecular_function: sequence-specific DNA binding transcription factor activity), GO:0043565(molecular_function: sequence-specific DNA binding), GO:0006355(biological_process: regulation of transcription, DNA-templated)	AT4G31550.1	WRKY DNA-binding protein 11
Medtr1g009617	chr1	-	1377649	1383737	0	0	0	0.003802	0	0.002519	0	0	0	0	0	0	DEAD-box ATP-dependent RNA helicase-like protein	PF00271(Helicase conserved C-terminal domain), PF00270(DEAD/DEAH box helicase)	PTHR24031(RNA HELICASE), PTHR24031:SF11(PROTEIN MUT-14-RELATED)	KOG0330(ATP-dependent RNA helicase)			GO:0003676(molecular_function: nucleic acid binding), GO:0005524(molecular_function: ATP binding), GO:0008026(molecular_function: ATP-dependent helicase activity), GO:0004386(molecular_function: helicase activity)	AT5G60990.1	DEA(D/H)-box RNA helicase family protein
Medtr1g009460	chr1	-	1391603	1391836	0	0.021863	0	0.007059	0	0	0	0	0	0	0	0	inactive purple acid phosphatase, putative							AT5G63140.1	purple acid phosphatase 29
MT4Noble_000213	chr1	+	1392332	1393331	0	0	0	0.008157	0.012668	0.045239	0.004781	0	0	0	0	0.055535
Medtr1g009450	chr1	+	1392339	1394152	0	0	0	0.009149	0.013682	0.048858	0.005163	0	0.002255	0	0	0.059977	shikimate kinase-like protein, putative							AT2G35500.1	shikimate kinase like 2
Medtr1g009620	chr1	+	1396020	1399053	3.62638	3.30053	3.69192	3.46261	3.46785	3.62851	3.67564	3.60544	3.87641	4.21162	4.46163	4.16906	exocyst complex exo70-like protein	PF03081(Exo70 exocyst complex subunit)	PTHR12542(EXOCYST COMPLEX PROTEIN EXO70), PTHR12542:SF7(EXOCYST COMPLEX COMPONENT 7)	KOG2344(Exocyst component protein and related proteins)		K07195(Endocrine system: Insulin signaling pathway [PATH:ko04910]: EXOC7, EXO70; exocyst complex component 7)	GO:0006887(biological_process: exocytosis), GO:0000145(cellular_component: exocyst)	AT4G31540.1	exocyst subunit exo70 family protein G1
Medtr1g009640	chr1	+	1409585	1411442	55.7588	49.1271	45.7512	62.2965	62.0711	66.1712	42.9645	48.5045	56.3423	49.5935	46.5928	51.5029	hypothetical protein							AT5G24890.1
Medtr1g009650	chr1	+	1414912	1421469	8.69343	8.68026	8.83485	14.0045	11.4313	13.6158	16.2182	17.5377	15.0111	11.841	12.7181	12.1909	pentatricopeptide (PPR) repeat protein	PF00571(CBS domain), PF01535(PPR repeat)	PTHR24015(FAMILY NOT NAMED)				GO:0030554(molecular_function: adenyl nucleotide binding)	AT5G10690.1	pentatricopeptide (PPR) repeat-containing protein / CBS domain-containing protein
Medtr1g009660	chr1	-	1422158	1425491	0.086633	0.179831	0.123145	0.264251	0.054084	0.288485	0.102154	0.216305	0.175965	0.079758	0.402094	0.394234	hypothetical protein							AT5G24880.1
Medtr1g009680	chr1	+	1431581	1436375	3.68126	4.30303	3.9702	5.37023	5.45715	5.21384	5.23289	4.21947	4.74957	5.15546	6.89778	5.49627	zinc finger, C3HC4 type (RING finger) protein, putative							AT5G24870.1	RING/U-box superfamily protein
Medtr1g009690	chr1	-	1438514	1441169	4.61331	4.08029	4.39833	5.03272	5.27402	5.65121	5.18918	3.90293	4.76671	5.92692	4.52293	4.36587	transcriptional regulator of RNA polII, SAGA, subunit							AT2G24530.1
Medtr1g009710	chr1	+	1448833	1451707	2.41141	3.08825	2.57688	3.44476	2.72755	3.5232	3.09353	3.43624	2.67262	4.67464	4.15348	4.39512	transcriptional regulator of RNA polII, SAGA, subunit							AT2G24530.1
Medtr1g009720	chr1	+	1458446	1464777	0.022002	0.015315	0	0.026477	0.008673	0.017438	0	0.027805	0.0513	0.027576	0.057707	0.009212	plasma membrane H+-ATPase	PF00122(E1-E2 ATPase), PF00702(haloacid dehalogenase-like hydrolase), PF00690(Cation transporter/ATPase, N-terminus)	PTHR24093:SF61(), PTHR24093(FAMILY NOT NAMED)	KOG0205(Plasma membrane H+-transporting ATPase)	3.6.3.6(Proton-exporting ATPase.)	K01535(Energy metabolism: Oxidative phosphorylation [PATH:ko00190]: PMA1, PMA2; H+-transporting ATPase)	GO:0000166(molecular_function: nucleotide binding), GO:0046872(molecular_function: metal ion binding)	AT2G07560.1	H(+)-ATPase 6
MT4Noble_000223	chr1	+	1472844	1473017	0.208647	0.491883	0.573809	0.184756	0.323397	0.781629	0.447255	0.483461	0.121047	1.24521	0.3703	0.832093
Medtr1g009730	chr1	-	1490466	1491428	0	0	0	0	0	0	0	0	0	0	0.110994	0	H(+)-ATPase, putative							AT2G24520.1	H(+)-ATPase 5
Medtr1g009750	chr1	+	1493125	1494825	0.485616	0.440719	0.256759	0.922284	0.128781	0.390681	0.337917	0.318517	0.263553	0.409415	0.252394	0.872306	class III peroxidase	PF00141(Peroxidase)					GO:0004601(molecular_function: peroxidase activity), GO:0020037(molecular_function: heme binding), GO:0006979(biological_process: response to oxidative stress), GO:0055114(biological_process: oxidation-reduction process)	AT4G30170.1	Peroxidase family protein
Medtr1g009760	chr1	-	1495173	1503400	15.053	14.8596	16.0253	9.74205	12.055	13.5608	7.67418	8.30238	9.75706	11.038	10.0701	13.6765	plasma membrane H+-ATPase	PF00702(haloacid dehalogenase-like hydrolase), PF00690(Cation transporter/ATPase, N-terminus), PF00122(E1-E2 ATPase)	PTHR24093:SF61(), PTHR24093(FAMILY NOT NAMED)	KOG0205(Plasma membrane H+-transporting ATPase)			GO:0000166(molecular_function: nucleotide binding), GO:0046872(molecular_function: metal ion binding)	AT2G24520.1	H(+)-ATPase 5
MT4Noble_000229	chr1	+	1503960	1505341	0	0	0	0	0	0	0	0	0	0	0	0
Medtr1g009770	chr1	+	1509159	1512465	32.755	34.0491	29.8078	35.76	34.7461	34.6769	34.5892	33.6836	34.6212	38.0085	40.9867	41.6712	C2H2-type zinc finger protein		PTHR13182(ZINC FINGER PROTEIN 622)	KOG2785(C2H2-type Zn-finger protein)				AT4G31420.1	Zinc finger protein 622
Medtr1g009780	chr1	+	1513775	1516852	10.0063	7.52097	7.82742	9.39723	8.7539	7.81952	10.8198	9.95912	9.0259	11.0441	10.89	10.7409	hypothetical protein							AT1G71430.1
Medtr1g009790	chr1	-	1518968	1522878	19.805	18.789	17.9399	22.9152	22.1205	20.6738	17.5279	20.7659	20.3668	24.0217	26.0688	32.5935	DUF1644 family protein	PF07800(Protein of unknown function (DUF1644))						AT4G31410.1	Protein of unknown function (DUF1644)
Medtr1g009830	chr1	-	1538343	1541892	1.82572	2.57523	2.12263	2.49965	1.99053	1.48864	1.67605	2.75878	2.5793	3.44225	2.88884	2.83245	hypothetical protein							AT1G50910.1
Medtr1g009840	chr1	+	1542198	1544398	2.24582	2.24228	1.42372	5.55419	5.3904	4.81411	10.6833	8.58266	7.53579	9.39404	7.23628	8.10567	plastid developmental protein DAG		PTHR10795(PROPROTEIN CONVERTASE SUBTILISIN/KEXIN), PTHR10795:SF75()					AT3G15000.1	cobalt ion binding
Medtr1g009850	chr1	-	1551191	1552908	0	0.009876	0	0	0	0	0	0	0	0	0	0.002752	phosphoenolpyruvate carboxylase	PF00311(Phosphoenolpyruvate carboxylase)					GO:0008964(molecular_function: phosphoenolpyruvate carboxylase activity), GO:0006099(biological_process: tricarboxylic acid cycle), GO:0015977(biological_process: carbon fixation)	AT1G53310.1	phosphoenolpyruvate carboxylase 1
MT4Noble_000237	chr1	-	1552946	1553430	0	0	0	0	0	0	0	0	0	0	0.270701	0	Phosphoenolpyruvate carboxylase 2
Medtr1g009860	chr1	-	1556922	1566166	84.1499	75.1636	88.3472	81.7691	70.3288	74.366	78.0129	81.397	64.5638	99.2218	118.911	93.9184	Serine/Threonine kinase, ABC1 family protein	PF03109(ABC1 family)	PTHR10566(CHAPERONE-ACTIVITY OF BC1 COMPLEX CABC1 -RELATED), PTHR10566:SF10(SUBFAMILY NOT NAMED)	KOG1235(Predicted unusual protein kinase)				AT4G31390.1	Protein kinase superfamily protein
Medtr1g009890	chr1	+	1581516	1585760	2.8727	1.97931	2.93895	2.4952	1.66466	2.07018	2.12222	2.23806	1.40947	1.97836	2.70558	3.169	replication protein A 32 kDa subunit-like protein	PF01336(OB-fold nucleic acid binding domain), PF08784(Replication protein A C terminal)	PTHR13989(REPLICATION PROTEIN A-RELATED), PTHR13989:SF7()	KOG3108(Single-stranded DNA-binding replication protein A (RPA), medium (30 kD) subunit)		K10739(Replication and repair: DNA repair and recombination proteins [BR:ko03400]: RFA2, RPA2; replication factor A2)	GO:0003676(molecular_function: nucleic acid binding)	AT2G24490.1	replicon protein A2
Medtr1g009900	chr1	-	1590188	1591062	0	0.124994	0.093825	0	0	0	0.001285	0.105506	0.047967	0.143763	0.128436	0.374605	flowering-promoting factor-like protein							AT5G10625.1
Medtr1g009950	chr1	-	1636871	1637789	0.097706	0.045136	0.108282	0	0	0.109498	0.040778	0.05048	0.132493	0	0	0	fasciclin domain protein							AT2G24450.1	FASCICLIN-like arabinogalactan protein 3 precursor
Medtr1g009960	chr1	-	1649119	1654584	21.4601	17.9713	17.1434	17.6679	18.5491	18.2722	20.2223	18.8576	18.4314	24.8318	20.3441	20.8222	core-2/I-branching enzyme	PF02485(Core-2/I-Branching enzyme)					GO:0008375(molecular_function: acetylglucosaminyltransferase activity), GO:0016020(cellular_component: membrane)	AT5G57270.1	Core-2/I-branching beta-1,6-N-acetylglucosaminyltransferase family protein
Medtr1g009970	chr1	+	1655448	1657343	0	0	0	0	0	0	0	0	0.002181	0	0	0	hypothetical protein
Medtr1g009980	chr1	+	1660245	1664679	107.673	96.6262	121.832	117.954	103.616	100.883	140.194	139.148	138.154	107.391	91.0878	75.4854	plastid lipid-associated protein	PF04755(PAP_fibrillin)					GO:0005198(molecular_function: structural molecule activity), GO:0009507(cellular_component: chloroplast)	AT5G19940.1	Plastid-lipid associated protein PAP / fibrillin family protein
Medtr1g010000	chr1	+	1665925	1667788	1.15256	1.05919	1.21858	2.29354	2.06231	1.49913	2.34593	1.69519	2.12239	1.27267	1.35392	1.62087	SPOUT methyltransferase, putative	PF02590(Predicted SPOUT methyltransferase)				K00783(Translation: Ribosome biogenesis [BR:ko03009]: rlmH; 23S rRNA (pseudouridine1915-N3)-methyltransferase)	GO:0008168(molecular_function: methyltransferase activity), GO:0006364(biological_process: rRNA processing), GO:0005737(cellular_component: cytoplasm)	AT5G10620.1	methyltransferases
Medtr1g010010	chr1	+	1676321	1682368	1.99619	2.07388	2.0374	1.83564	2.49779	1.69776	1.76851	1.64695	1.86044	2.42771	2.13601	2.09342	transmembrane protein, putative	PF10058(Predicted integral membrane zinc-ribbon metal-binding protein)	PTHR22166(FAMILY NOT NAMED), PTHR22166:SF1()	KOG2846(Predicted membrane protein)				AT4G31080.1	Protein of unknown function (DUF2296)
Medtr1g010020	chr1	+	1683287	1688017	1.26065	1.46152	1.03574	1.97463	1.50122	1.33727	1.86521	2.33308	1.32927	1.01211	1.11735	1.23817	PPR containing plant-like protein	PF01535(PPR repeat)	PTHR24015(FAMILY NOT NAMED)					AT5G24830.1	Tetratricopeptide repeat (TPR)-like superfamily protein
Medtr1g010030	chr1	-	1690934	1700852	1.49753	0.956007	1.15757	1.60233	1.716	1.66188	1.1123	1.40618	1.53415	1.44382	1.13207	1.74898	pre-mRNA-splicing factor ATP-dependent RNA helicase DHX16, putative							AT1G32490.1	RNA helicase family protein
MT4Noble_000253	chr1	+	1700835	1703922	0.452528	0.878186	0.878566	0.508833	0.831243	0.643101	0.223385	0.61158	0.616341	0.415026	0.319765	0.428493
Medtr1g010040	chr1	+	1703938	1713526	4.42491	5.38147	4.89476	4.91257	4.58082	6.04992	4.19421	4.34243	4.70461	4.67848	4.36245	4.65569	ubiquitin carboxyl-terminal hydrolase	PF00443(Ubiquitin carboxyl-terminal hydrolase)	PTHR24006:SF163(), PTHR24006(FAMILY NOT NAMED)	KOG1863(Ubiquitin carboxyl-terminal hydrolase)			GO:0004843(molecular_function: ubiquitin-specific protease activity), GO:0006511(biological_process: ubiquitin-dependent protein catabolic process)	AT3G49600.1	ubiquitin-specific protease 26
Medtr1g010050	chr1	-	1714470	1715277	95.0526	93.9595	76.1591	84.6382	81.9566	76.3649	65.5673	64.5136	75.7748	90.5752	90.767	76.8563	GGL domain protein
Medtr1g010070	chr1	+	1724639	1728515	9.22727	8.03862	7.58882	14.8421	14.8082	11.6838	16.5883	14.9541	14.9659	11.3848	13.4051	13.3976	16S rRNA (cytosine(1402)-N(4))-methyltransferase	PF01795(MraW methylase family)	PTHR11265(S-ADENOSYL-METHYLTRANSFERASE MRAW)	KOG2782(Putative SAM dependent methyltransferases)			GO:0008168(molecular_function: methyltransferase activity)	AT5G10910.1	mraW methylase family protein
Medtr1g010080	chr1	+	1729190	1733113	22.2899	19.9231	20.7226	40.468	37.1371	35.8975	40.0399	43.7313	45.4234	27.3257	25.5399	24.5462	DUF1997 family protein	PF09366(Protein of unknown function (DUF1997))						AT4G31115.2	Protein of unknown function (DUF1997)
MT4Noble_000258	chr1	-	1733671	1734441	15.5626	14.023	20.1171	15.036	14.4409	13.893	12.1524	17.0424	17.6529	16.6677	14.1964	15.1495
Medtr1g010090	chr1	-	1734036	1736812	33.1755	33.1241	38.9198	29.9906	30.0824	25.9032	22.353	27.1848	31.542	29.6857	25.9794	24.1793	hypothetical protein
Medtr1g010100	chr1	-	1738827	1739165	29.962	32.1291	30.0089	19.9623	23.8393	18.9528	16.1152	19.5344	20.2115	21.5965	17.9214	16.7774	pre-mRNA-splicing factor cwc-21, putative	PF08312(cwf21 domain)						AT3G49601.1
Medtr1g010110	chr1	-	1745637	1747295	0	0	0	0	0	0	0	0	0	0	0	0	transmembrane protein, putative	PF06749(Protein of unknown function (DUF1218))						AT4G31130.1	Protein of unknown function (DUF1218)
Medtr1g010120	chr1	+	1751260	1754940	15.8512	15.1112	17.9691	12.7856	15.0092	12.1409	11.9527	11.2443	12.3773	10.7484	12.4112	10.0559	glucan endo-1,3-beta-glucosidase-like protein	PF00332(Glycosyl hydrolases family 17), PF07983(X8 domain)	PTHR16631(FAMILY NOT NAMED)				GO:0004553(molecular_function: hydrolase activity, hydrolyzing O-glycosyl compounds), GO:0005975(biological_process: carbohydrate metabolic process)	AT4G31140.1	O-Glycosyl hydrolases family 17 protein
Medtr1g010130	chr1	-	1758257	1761173	5.71968	5.22442	4.57083	9.90349	10.38	10.4927	9.08441	9.60897	10.1002	11.6115	13.7847	16.8796	endonuclease V-like protein	PF04493(Endonuclease V)		KOG4417(Predicted endonuclease)			GO:0004519(molecular_function: endonuclease activity), GO:0006281(biological_process: DNA repair)	AT4G31150.1	endonuclease V family protein
Medtr1g010140	chr1	+	1768577	1771451	0.423535	0.386393	0.342794	0.194885	0.209168	0.239634	0.089985	0.103874	0.192618	0.261889	0.204382	0.29972	DUF581 family protein	PF04570(zinc-finger of the FCS-type, C2-C2)						AT5G11460.1	Protein of unknown function (DUF581)
MT4Noble_000265	chr1	-	1778247	1778746	12.9994	11.0929	13.2762	14.0185	16.2381	11.7477	8.60022	13.5414	18.04	32.6524	28.6213	41.3871
Medtr1g010150	chr1	-	1778859	1781683	40.725	42.5171	45.5875	47.9496	55.1741	47.3987	40.9123	45.8845	63.5756	135.333	116.921	178.639	CHY and CTCHY and RING-type zinc finger protein	PF00097(Zinc finger, C3HC4 type (RING finger))	PTHR21319(RING FINGER AND CHY ZINC FINGER DOMAIN-CONTAINING PROTEIN 1)	KOG1940(Zn-finger protein)			GO:0046872(molecular_function: metal ion binding)	AT5G25560.4	CHY-type/CTCHY-type/RING-type Zinc finger protein
Medtr1g010170	chr1	-	1784076	1784423	32.9169	30.2497	33.6554	36.5118	45.7631	25.8595	25.2301	31.572	43.0694	81.689	87.4885	125.767	hypothetical protein
Medtr1g010180	chr1	+	1792069	1792751	0	0	0	0	0	0	0	0	0	0	0	0	transmembrane protein, putative	PF06749(Protein of unknown function (DUF1218))						AT4G31130.1	Protein of unknown function (DUF1218)
Medtr1g010190	chr1	+	1793366	1794171	0	0	0	0	0.086618	0	0	0.093456	0	0	0	0	transmembrane protein, putative
Medtr1g010210	chr1	+	1806316	1808831	0.776831	0.523634	0.946415	0.608894	0.308772	0.527557	0.452362	0.371932	0.509105	0.30505	0.42128	0.604742	sulfate transporter-like protein	PF00916(Sulfate permease family)					GO:0015116(molecular_function: sulfate transmembrane transporter activity), GO:0008272(biological_process: sulfate transport), GO:0016021(cellular_component: integral component of membrane)	AT2G25680.1	molybdate transporter 1
Medtr1g010220	chr1	-	1815272	1818180	0	0	0.001929	0	0.022088	0.000686	0	0	0.000504	0	0.001188	0	wall-associated receptor kinase-like protein	PF07714(Protein tyrosine kinase), PF07645(Calcium-binding EGF domain)	PTHR24420:SF444(), PTHR24420()	KOG1187(Serine/threonine protein kinase)			GO:0005509(molecular_function: calcium ion binding), GO:0004672(molecular_function: protein kinase activity), GO:0006468(biological_process: protein phosphorylation)	AT1G21230.1	wall associated kinase 5
Medtr1g010230	chr1	-	1832241	1833627	0	0	0	0	0	0	0	0	0	0	0	0	wall-associated receptor kinase galacturonan-binding protein							AT1G21250.1	cell wall-associated kinase
Medtr1g010240	chr1	+	1839809	1843670	5.56276	5.38946	4.5764	3.36799	3.69099	3.75413	2.25175	1.8387	2.7303	2.75072	2.68268	2.61496	wall associated kinase-like protein, putative	PF07645(Calcium-binding EGF domain), PF08488(Wall-associated kinase), PF00069(Protein kinase domain)	PTHR24420(), PTHR24420:SF444()	KOG1187(Serine/threonine protein kinase)			GO:0004672(molecular_function: protein kinase activity), GO:0005524(molecular_function: ATP binding), GO:0006468(biological_process: protein phosphorylation), GO:0005509(molecular_function: calcium ion binding), GO:0004674(molecular_function: protein serine/threonine kinase activity), GO:0016021(cellular_component: integral component of membrane)	AT1G21240.1	wall associated kinase 3
MT4Noble_000274	chr1	+	1843831	1847909	0	0.02095	0.050258	0.00599	0.100305	0.042708	0.031124	0	0.046588	0	0	0.003257
Medtr1g010250	chr1	+	1855016	1857884	39.9107	41.5188	26.3275	15.457	19.5628	25.1855	11.0955	7.24313	10.4289	15.0553	19.6114	14.5118	wall-associated receptor kinase-like protein, putative	PF07714(Protein tyrosine kinase)	PTHR24420:SF444(), PTHR24420()	KOG1187(Serine/threonine protein kinase)			GO:0004672(molecular_function: protein kinase activity), GO:0006468(biological_process: protein phosphorylation)	AT1G21230.1	wall associated kinase 5
Medtr1g010260	chr1	+	1865298	1869279	28.091	35.3356	20.3166	10.989	17.4286	17.087	9.76507	6.30938	8.90868	11.6782	14.4691	10.0435	wall-associated receptor kinase-like protein	PF07645(Calcium-binding EGF domain), PF07714(Protein tyrosine kinase), PF08488(Wall-associated kinase)	PTHR24420(), PTHR24420:SF444()	KOG1187(Serine/threonine protein kinase)			GO:0005509(molecular_function: calcium ion binding), GO:0004672(molecular_function: protein kinase activity), GO:0006468(biological_process: protein phosphorylation), GO:0004674(molecular_function: protein serine/threonine kinase activity), GO:0016021(cellular_component: integral component of membrane)	AT1G21270.1	wall-associated kinase 2
Medtr1g010270	chr1	+	1874465	1876458	3.86673	4.89961	3.65822	1.2219	0.741121	1.41516	0.571226	0.666024	0.761224	1.04552	1.11033	1.13626	sulfate transporter-like protein							AT2G25680.1	molybdate transporter 1
Medtr1g010280	chr1	-	1878255	1882680	0	0	0	0	0	0	0	0	0	0.033069	0	0	ArfGap/RecO-like zinc finger protein, putative		PTHR23180(CENTAURIN/ARF), PTHR23180:SF87()	KOG0702(Predicted GTPase-activating protein)				AT4G32630.1	ArfGap/RecO-like zinc finger domain-containing protein
Medtr1g010290	chr1	-	1888016	1894865	6.81799	6.93256	7.96224	5.68452	6.43029	5.79543	6.29476	5.9397	6.49314	6.64767	6.16705	8.1275	enhancer of polycomb-like transcription factor protein	PF10513(Enhancer of polycomb-like)						AT4G32620.1	Enhancer of polycomb-like transcription factor protein
Medtr1g010300	chr1	+	1902541	1916763	13.1547	13.5533	11.6758	12.5398	15.0566	14.2929	9.14018	9.8041	11.4647	24.7985	23.07	34.2928	embryo defective 2410 protein	PF04357(Family of unknown function (DUF490))						AT2G25660.1	embryo defective 2410
Medtr1g011280	chr1	+	1918950	1921811	31.2152	31.7928	27.1284	35.1034	32.3774	34.8835	31.9152	30.46	29.3445	40.0111	39.971	40.8657	CTC-interacting domain protein, putative							AT5G25540.1	CTC-interacting domain 6
Medtr1g011260	chr1	+	1953709	1955267	0.012653	0.082908	0	0	0	0	0.165916	0.083539	0.048596	0.018806	0.012918	0.002224	membrane protein Ycf1							ATCG01130.1	Ycf1 protein
Medtr1g011320	chr1	-	1963143	1965930	0	0.004795	0.085523	0.003127	0	0	0.042896	0.068497	0.04368	0	0	0	hypothetical protein
Medtr1g011340	chr1	-	1969316	1970664	0	0.073869	0	0.360308	0.106305	0.541865	0.13176	0.681977	0.691709	0.234369	0	0.428841	transmembrane protein, putative							AT4G32600.1	RING/U-box superfamily protein
Medtr1g011380	chr1	-	1996826	2002136	14.2975	14.1967	13.1393	15.0203	15.2792	13.7071	12.1717	12.4311	14.0891	17.518	17.4193	17.0192	zinc finger, C3HC4 type (RING finger) protein	PF00097(Zinc finger, C3HC4 type (RING finger))	PTHR14155:SF27(), PTHR14155(RING FINGER DOMAIN-CONTAINING)	KOG1493(Anaphase-promoting complex (APC), subunit 11)			GO:0046872(molecular_function: metal ion binding)	AT4G32600.1	RING/U-box superfamily protein
Medtr1g011400	chr1	+	2006190	2008130	0	0	0.075193	0	0	0	0	0	0	0	0	0	F-box/RNI/FBD-like domain protein	PF08387(FBD), PF07723(Leucine Rich Repeat)						AT1G13570.1	F-box/RNI-like superfamily protein
Medtr1g011430	chr1	+	2019507	2021235	0	0	0	0	0	0	0	0	0	0	0	0	F-box/RNI/FBD-like domain protein	PF07723(Leucine Rich Repeat), PF00646(F-box domain)					GO:0005515(molecular_function: protein binding)	AT1G13570.1	F-box/RNI-like superfamily protein
Medtr1g011460	chr1	+	2029392	2032542	7.87334	7.11892	8.4353	7.08617	5.61788	7.37872	6.78795	5.81201	6.00379	6.2351	5.96253	5.2888	protein phosphatase 2A regulatory B subunit family protein	PF01603(Protein phosphatase 2A regulatory B subunit (B56 family))	PTHR10257:SF3(BCDNA.LD34343), PTHR10257(SERINE/THREONINE PROTEIN PHOSPHATASE 2A PP2A REGULATORY SUBUNIT B)	KOG2085(Serine/threonine protein phosphatase 2A, regulatory subunit)		K11584(Infectious diseases: Human papillomavirus infection [PATH:ko05165]: PPP2R5; serine/threonine-protein phosphatase 2A regulatory subunit B')	GO:0008601(molecular_function: protein phosphatase type 2A regulator activity), GO:0007165(biological_process: signal transduction), GO:0000159(cellular_component: protein phosphatase type 2A complex)	AT5G25510.1	Protein phosphatase 2A regulatory B subunit family protein
Medtr1g011470	chr1	-	2033308	2038488	0.025319	0.051474	0.238728	0.023613	0	0	0.092231	0	0.0279	0	0.03469	0.089984	carboxy-terminal domain cyclin	PF02984(Cyclin, C-terminal domain), PF00134(Cyclin, N-terminal domain)	PTHR10177:SF49(), PTHR10177(CYCLINE)	KOG0654(G2/Mitotic-specific cyclin A)			GO:0005634(cellular_component: nucleus)	AT5G11300.1	mitotic-like cyclin 3B from Arabidopsis
Medtr1g011490	chr1	-	2047500	2049055	0.313846	0.315088	0.236782	0.146178	0.106779	0.12833	0.226982	0.180085	0.212882	0.270993	0.355464	0.322121	DUF223 domain protein	PF02721(Domain of unknown function DUF223)		KOG0851(Single-stranded DNA-binding replication protein A (RPA), large (70 kD) subunit and related ssDNA-binding proteins)				AT1G52950.1	Nucleic acid-binding, OB-fold-like protein
Medtr1g011510	chr1	-	2055774	2058499	12.7812	13.0374	18.0957	23.3172	16.1099	20.5152	25.068	29.558	23.091	18.8957	19.0468	19.1623	2Fe-2S iron-sulfur cluster-binding domain protein	PF00111(2Fe-2S iron-sulfur cluster binding domain)	PTHR23426(FERREDOXIN/ADRENODOXIN), PTHR23426:SF2()				GO:0009055(molecular_function: electron carrier activity), GO:0051536(molecular_function: iron-sulfur cluster binding)	AT4G32590.1	2Fe-2S ferredoxin-like superfamily protein
Medtr1g011520	chr1	+	2060030	2064273	2.3302	1.45972	1.38001	3.79291	3.4804	3.60921	3.87058	4.38558	4.33989	3.57894	2.69642	3.00849	PPR containing plant-like protein	PF01535(PPR repeat)	PTHR24015(FAMILY NOT NAMED)					AT5G11310.1	Pentatricopeptide repeat (PPR) superfamily protein
Medtr1g011540	chr1	-	2066824	2068509	0	0	0	0	0	0	0	0	0	0	0	0	leghemoglobin Lb120-1	PF00042(Globin)	PTHR22924:SF4(), PTHR22924(LEGHEMOGLOBIN-RELATED)				GO:0005506(molecular_function: iron ion binding), GO:0020037(molecular_function: heme binding)	AT3G10520.1	haemoglobin 2
Medtr1g011600	chr1	-	2095330	2096494	0	0	0	0.082019	0.32012	0.201742	0.498548	0.239281	0.470987	1.07148	0.512421	1.48486	2-oxoglutarate-dependent dioxygenase	PF03171(2OG-Fe(II) oxygenase superfamily)	PTHR10209(OXIDOREDUCTASE, 2OG-FE II OXYGENASE FAMILY PROTEIN), PTHR10209:SF55()	KOG0143(Iron/ascorbate family oxidoreductases)			GO:0016491(molecular_function: oxidoreductase activity), GO:0016706(molecular_function: oxidoreductase activity, acting on paired donors, with incorporation or reduction of molecular oxygen, 2-oxoglutarate as one donor, and incorporation of one atom each of oxygen into both donors), GO:0055114(biological_process: oxidation-reduction process)	AT1G52820.1	2-oxoglutarate (2OG) and Fe(II)-dependent oxygenase superfamily protein
Medtr1g011610	chr1	-	2100048	2110686	24.0943	26.4721	27.0776	20.722	24.1971	21.9114	19.9202	20.1627	22.6591	27.4071	23.699	24.5475	transcriptional corepressor leunig-like protein	PF08513(LisH), PF00400(WD domain, G-beta repeat)	PTHR22847(WD40 REPEAT PROTEIN)	KOG0266(WD40 repeat-containing protein)			GO:0005515(molecular_function: protein binding)	AT4G32551.1	LisH dimerisation motif;WD40/YVTN repeat-like-containing domain
Medtr1g011630	chr1	-	2133963	2136290	0	0	0.040478	0	0	0	0	0	0	0	0	0	indole-3-pyruvate monooxygenase	PF00743(Flavin-binding monooxygenase-like)	PTHR23023(DIMETHYLANILINE MONOOXYGENASE), PTHR23023:SF5()	KOG1399(Flavin-containing monooxygenase)	1.14.13.-()	K11816(Amino acid metabolism: Tryptophan metabolism [PATH:ko00380]: YUCCA; indole-3-pyruvate monooxygenase)	GO:0004499(molecular_function: N,N-dimethylaniline monooxygenase activity), GO:0050660(molecular_function: flavin adenine dinucleotide binding), GO:0050661(molecular_function: NADP binding), GO:0055114(biological_process: oxidation-reduction process)	AT5G11320.1	Flavin-binding monooxygenase family protein
Medtr1g011640	chr1	-	2146078	2154686	0.243896	0.228766	0.276503	0.57257	0.494273	0.529773	0.371077	0.513636	0.501935	0.398561	0.408628	0.372024	drug resistance transporter-like ABC domain protein	PF08370(Plant PDR ABC transporter associated), PF00005(ABC transporter), PF01061(ABC-2 type transporter)	PTHR19241(ATP-BINDING CASSETTE TRANSPORTER), PTHR19241:SF10()	KOG0065(Pleiotropic drug resistance proteins (PDR1-15), ABC superfamily)			GO:0005524(molecular_function: ATP binding), GO:0016887(molecular_function: ATPase activity), GO:0016020(cellular_component: membrane)	AT1G15520.1	pleiotropic drug resistance 12
Medtr1g011650	chr1	-	2157509	2167106	6.33008	6.62674	5.4306	7.75646	10.9167	9.39707	4.78121	4.67918	5.91593	22.6581	23.3872	37.9025	ABC-2 and plant PDR ABC-type transporter family protein	PF01061(ABC-2 type transporter), PF08370(Plant PDR ABC transporter associated), PF00005(ABC transporter)	PTHR19241:SF10(), PTHR19241(ATP-BINDING CASSETTE TRANSPORTER)	KOG0065(Pleiotropic drug resistance proteins (PDR1-15), ABC superfamily)			GO:0005524(molecular_function: ATP binding), GO:0016887(molecular_function: ATPase activity), GO:0016020(cellular_component: membrane)	AT1G15520.1	pleiotropic drug resistance 12
Medtr1g011660	chr1	-	2172188	2173756	0	0	0	0	0	0	0	0	0	0	0	0	HXXXD-type acyl-transferase family protein	PF02458(Transferase family)					GO:0016747(molecular_function: transferase activity, transferring acyl groups other than amino-acyl groups)	AT4G29250.1	HXXXD-type acyl-transferase family protein
Medtr1g011670	chr1	-	2174678	2174997	0	0	0	0.036579	0	0	0	0	0	0	0	0	ribosomal protein L33 family protein, putative							AT5G18790.1	Ribosomal protein L33 family protein
Medtr1g011680	chr1	+	2177904	2178440	0	0	0	0	0	0	0	0	0	0	0	0	P-loop nucleoside triphosphate hydrolase superfamily protein, putative	PF00004(ATPase family associated with various cellular activities (AAA))	PTHR23070(BCS1 AAA-TYPE ATPASE), PTHR23070:SF1()				GO:0005524(molecular_function: ATP binding)	AT3G28540.1	P-loop containing nucleoside triphosphate hydrolases superfamily protein
Medtr1g011690	chr1	-	2179359	2182483	21.7523	22.3316	19.1666	27.6839	25.9248	27.921	22.4238	26.4286	25.6871	23.3884	26.8848	25.6132	FAD/NAD(P)-binding oxidoreductase family protein		PTHR13789(MONOOXYGENASE), PTHR13789:SF8()	KOG2614(Kynurenine 3-monooxygenase and related flavoprotein monooxygenases)				AT5G11330.1	FAD/NAD(P)-binding oxidoreductase family protein
Medtr1g011700	chr1	+	2184151	2186458	0.222917	0.199101	0.100542	0.125678	0.406184	0.124606	0.199278	0.210986	0.083905	0.167967	0.186989	0.387167	FAD/NAD(P)-binding oxidoreductase family protein		PTHR13789(MONOOXYGENASE), PTHR13789:SF8()	KOG2614(Kynurenine 3-monooxygenase and related flavoprotein monooxygenases)				AT5G11330.1	FAD/NAD(P)-binding oxidoreductase family protein
Medtr1g011710	chr1	-	2188299	2191122	0.389638	0.199473	0.349331	0.396	0.393024	0.352341	0.398699	0.540945	0.63343	0.61716	0.776986	0.674773	pre-mRNA splicing factor-like protein	PF06424(PRP1 splicing factor, N-terminal)	PTHR11246(PRE-MRNA SPLICING FACTOR), PTHR11246:SF1(PRE-MRNA-PROCESSING FACTOR 6)	KOG0495(HAT repeat protein)			GO:0000398(biological_process: mRNA splicing, via spliceosome), GO:0005634(cellular_component: nucleus)	AT4G03430.1	pre-mRNA splicing factor-related
Medtr1g011720	chr1	+	2193529	2203920	4.02217	3.67764	3.80509	4.56361	4.64701	4.16038	3.64047	3.69881	4.31096	3.21458	2.8879	2.96672	carbon catabolite repressor-like protein	PF03372(Endonuclease/Exonuclease/phosphatase family)	PTHR12121(CARBON CATABOLITE REPRESSOR PROTEIN 4), PTHR12121:SF9()	KOG0620(Glucose-repressible alcohol dehydrogenase transcriptional effector CCR4 and related proteins)				AT5G11350.1	DNAse I-like superfamily protein
Medtr1g011730	chr1	-	2204067	2205465	0.11301	0.195647	0	0.133656	0	0	0	0	0	0	0	0	RCD one-like protein, putative							AT1G70440.1	similar to RCD one 3
Medtr1g011740	chr1	-	2210664	2214075	0	0	0	0	0	0	0	0	0	0	0	0.032097	hypothetical protein
Medtr1g011750	chr1	-	2215483	2219316	40.1195	35.0083	34.7972	38.9432	36.5867	36.6029	36.8121	36.9154	39.1614	37.427	38.3976	37.4302	core histone H2A/H2B/H3/H4	PF00125(Core histone H2A/H2B/H3/H4)	PTHR23430(HISTONE H2A)	KOG1757(Histone 2A)		K11251(Substance dependence: Alcoholism [PATH:ko05034]: H2A; histone H2A)	GO:0003677(molecular_function: DNA binding)	AT1G52740.1	histone H2A protein 9
Medtr1g011850	chr1	-	2223509	2226797	62.9279	53.0735	51.3578	48.0861	49.2849	57.817	46.2079	47.7225	50.6947	53.1942	51.9881	52.0933	core histone H2A/H2B/H3/H4	PF00125(Core histone H2A/H2B/H3/H4)	PTHR23430(HISTONE H2A)	KOG1757(Histone 2A)		K11251(Substance dependence: Alcoholism [PATH:ko05034]: H2A; histone H2A)	GO:0003677(molecular_function: DNA binding)	AT1G52740.1	histone H2A protein 9
Medtr1g011840	chr1	+	2231939	2236207	0	0	0	0	0	0	0	0	0	0	0	0	boron transporter-like protein	PF00955(HCO3- transporter family)	PTHR11453(ANION EXCHANGE PROTEIN), PTHR11453:SF6()				GO:0006820(biological_process: anion transport), GO:0016021(cellular_component: integral component of membrane)	AT1G15460.1	HCO3- transporter family
Medtr1g011755	chr1	-	2239566	2245149	0.016406	0	0	0	0	0	0	0	0	0	0.02225	0	inwardly rectifying potassium channel subunit	PF00023(Ankyrin repeat), PF00520(Ion transport protein), PF00027(Cyclic nucleotide-binding domain), PF11834(KHA, dimerisation domain of potassium ion channel)	PTHR10217:SF6(), PTHR10217(VOLTAGE AND LIGAND GATED POTASSIUM CHANNEL)	KOG0498(K+-channel ERG and related proteins, contain PAS/PAC sensor domain)			GO:0005515(molecular_function: protein binding), GO:0005216(molecular_function: ion channel activity), GO:0006811(biological_process: ion transport), GO:0055085(biological_process: transmembrane transport), GO:0016020(cellular_component: membrane)	AT2G26650.1	K+ transporter 1
Medtr1g011880	chr1	+	2251690	2255411	91.8126	110.75	90.949	98.0553	98.9688	87.2674	105.948	97.2842	96.708	113.978	121.959	119.098	cytochrome B-c1 complex subunit 7	PF02271(Ubiquinol-cytochrome C reductase complex 14kD subunit)	PTHR12022(UBIQUINOL-CYTOCHROME C REDUCTASE COMPLEX 14 KD PROTEIN)	KOG3440(Ubiquinol cytochrome c reductase, subunit QCR7)			GO:0006122(biological_process: mitochondrial electron transport, ubiquinol to cytochrome c), GO:0005750(cellular_component: mitochondrial respiratory chain complex III)	AT4G32470.1	Cytochrome bd ubiquinol oxidase, 14kDa subunit
Medtr1g011800	chr1	+	2282936	2288081	23.9629	16.5286	61.8415	14.6769	14.5238	14.5519	18.6484	17.2459	13.9591	9.56339	8.91189	8.23548	plant/F18G18-200 protein	PF04862(Protein of unknown function (DUF642))						AT5G11420.1	Protein of unknown function, DUF642
Medtr1g011980	chr1	+	2294301	2302211	13.1727	11.4137	12.5282	12.8996	13.4152	12.1357	11.8623	11.6312	13.0413	14.0232	12.7429	14.6643	peptidyl-prolyl cis-trans isomerase	PF00160(Cyclophilin type peptidyl-prolyl cis-trans isomerase/CLD)	PTHR11071(PEPTIDYL-PROLYL CIS-TRANS ISOMERASE)	KOG0546(HSP90 co-chaperone CPR7/Cyclophilin)			GO:0003755(molecular_function: peptidyl-prolyl cis-trans isomerase activity), GO:0006457(biological_process: protein folding)	AT3G63400.1	Cyclophilin-like peptidyl-prolyl cis-trans isomerase family protein
Medtr1g011990	chr1	-	2303846	2308235	0.005465	0.009089	0.006541	0	0	0.004423	0.00302	0	0.007889	0	0	0	NB-ARC domain disease resistance protein	PF00931(NB-ARC domain)	PTHR11017(LEUCINE-RICH REPEAT-CONTAINING PROTEIN), PTHR11017:SF126()				GO:0043531(molecular_function: ADP binding)	AT3G07040.1	NB-ARC domain-containing disease resistance protein
MT4Noble_000330	chr1	+	2306685	2307392	0	0	0	0	0	0.060301	0	0.09232	0	0	0	0
Medtr1g012000	chr1	-	2308837	2309308	0	0	0	0	0	0	0	0	0	0	0	0	cysteine-rich polycomb-like protein, putative							AT4G14770.1	TESMIN/TSO1-like CXC 2
Medtr1g012010	chr1	+	2309421	2310654	0	0.057181	0	0	0	0.0577	0.040256	0.127901	0	0	0.07746	0	hypothetical protein	PF01435(Peptidase family M48)					GO:0004222(molecular_function: metalloendopeptidase activity), GO:0006508(biological_process: proteolysis), GO:0016020(cellular_component: membrane)	AT5G51740.1	Peptidase family M48 family protein
Medtr1g012015	chr1	+	2311143	2311454	0	0.136938	0	0.07575	0.091239	0.015358	0.026424	0	0.261159	0	0	0	M48 family peptidase	PF01435(Peptidase family M48)					GO:0004222(molecular_function: metalloendopeptidase activity), GO:0006508(biological_process: proteolysis), GO:0016020(cellular_component: membrane)	AT5G51740.1	Peptidase family M48 family protein
Medtr1g012020	chr1	-	2312974	2319368	0.160243	0.312481	0.238379	0.156397	0.138723	0.078814	0.142676	0.188472	0.153934	0.17312	0.087305	0.188237	cysteine-rich polycomb-like protein	PF03638(Tesmin/TSO1-like CXC domain, cysteine-rich domain)	PTHR12446:SF4(), PTHR12446(TESMIN/TSO1-RELATED)					AT4G14770.1	TESMIN/TSO1-like CXC 2
Medtr1g012030	chr1	-	2322239	2325896	4.19575	4.8512	2.78629	5.89844	4.50527	5.10443	7.2018	7.47216	6.0992	5.92998	5.76706	5.14922	substrate carrier family protein	PF00153(Mitochondrial carrier protein)	PTHR24089(FAMILY NOT NAMED), PTHR24089:SF87()	KOG0752(Mitochondrial solute carrier protein)				AT4G32400.1	Mitochondrial substrate carrier family protein
Medtr1g012040	chr1	-	2327807	2330238	0	0	0	0	0	0	0	0	0	0	0.000806	0	PIF1-like helicase	PF05970(PIF1-like helicase)	PTHR10492(UNCHARACTERIZED)	KOG0987(DNA helicase PIF1/RRM3)			GO:0003678(molecular_function: DNA helicase activity), GO:0000723(biological_process: telomere maintenance), GO:0006281(biological_process: DNA repair)	AT3G51690.1	PIF1 helicase
Medtr1g012160	chr1	+	2373104	2374136	67.8398	66.1859	59.266	73.7218	67.8758	63.3029	66.392	63.053	59.824	76.7394	78.7346	76.7957	ubiquitin family protein	PF00240(Ubiquitin family)		KOG0003(Ubiquitin/60s ribosomal protein L40 fusion)			GO:0005515(molecular_function: protein binding)	AT4G03430.1	pre-mRNA splicing factor-related
Medtr1g012170	chr1	-	2374538	2375377	0.33784	0.349043	0.568289	0.655007	0.349034	0.318617	0.370806	0.293901	0.275266	0.672261	0.557412	0.470061	hypothetical protein
Medtr1g012180	chr1	+	2375794	2376227	0.799623	0.646234	1.57937	1.97204	1.4999	1.33207	1.07815	1.02364	1.20495	1.53601	0.851135	0.989655	hypothetical protein
MT4Noble_000342	chr1	-	2378652	2379224	0	0	0	0.059297	0	0	0	0	0	0	0	0.268268	IMP dehydrogenase/GMP reductase, putative
Medtr1g012190	chr1	-	2379844	2380277	0.969772	0.903073	1.75137	2.25948	1.45935	1.63964	1.31517	1.67435	1.02799	1.54141	0.93865	0.949693	hypothetical protein
Medtr1g012200	chr1	+	2380743	2380997	0.264908	0.410736	0.67609	1.04592	0.281031	0.361736	0.336047	0.43662	0.764174	0.744906	0.37681	0.583272	hypothetical protein
Medtr1g012210	chr1	-	2382131	2382883	99.0715	97.0936	86.8941	103.242	93.9118	82.6859	93.2861	90.1834	84.4705	107.494	111.932	106.536	ubiquitin family protein	PF00240(Ubiquitin family)		KOG0003(Ubiquitin/60s ribosomal protein L40 fusion)			GO:0005515(molecular_function: protein binding)	AT4G03430.1	pre-mRNA splicing factor-related
Medtr1g012260	chr1	-	2392835	2393767	0	0	0	0	0	0	0	0	0	0	0	0	aberrant root formation protein, putative							AT5G11030.2	aberrant lateral root formation 4
Medtr1g012280	chr1	-	2401628	2402683	0	0	0.049498	0	0	0	0	0	0	0.018345	0	0.14092	aberrant root formation protein, putative							AT5G11030.2	aberrant lateral root formation 4
Medtr1g012290	chr1	-	2403119	2403799	0	0	0	0	0	0	0	0	0	0.183583	0	0	hypothetical protein
Medtr1g012330	chr1	-	2416779	2418533	0.029951	0.064633	0.17449	0.008272	0.048918	0	0.006831	0	0.085077	0.134759	0.367533	0.599782	hypothetical protein
MT4Noble_000350	chr1	-	2417927	2418773	0.002723	0.112787	0	0.284089	0.042834	0	0.023527	0	0.062287	0.2514	0.385519	0.398049	F-box protein | PF00646 F-box domain
MT4Noble_000351	chr1	+	2419343	2420554	0.027452	0.053191	0.09214	0	0.10409	0.043433	0.034437	0.019451	0.022078	0.096137	0.369109	0.693253	E3 ubiquitin-protein ligase RF298-like protein, putative
Medtr1g012335	chr1	+	2419343	2421249	0.018391	0.061366	0.022479	0	0.064853	0.029593	0.072283	0.066459	0.009933	0.072827	0.285164	0.519127	hypothetical protein
MT4Noble_000353	chr1	-	2423494	2424407	0.244203	0.535574	0.852806	0.31531	0.165503	0.19096	0	0.060614	0.180311	0.324623	0.619719	1.24405	IMP dehydrogenase/GMP reductase, putative
Medtr1g012360	chr1	+	2425865	2432046	9.33077	10.1648	6.11082	12.4139	12.3638	11.8408	13.8692	14.413	15.5231	9.19091	7.39858	6.3693	kinesin-associated protein	PF05804(Kinesin-associated protein (KAP))						AT5G13060.1	ARMADILLO BTB protein 1
Medtr1g012370	chr1	-	2434182	2443929	4.67575	4.34723	3.98768	2.8824	3.37009	4.05592	2.81836	3.11173	3.32181	5.80239	5.8308	7.82246	AFG1-family ATPase	PF03969(AFG1-like ATPase)	PTHR12169(ATPASE N2B)	KOG2383(Predicted ATPase)			GO:0005524(molecular_function: ATP binding)	AT2G25530.1	AFG1-like ATPase family protein
Medtr1g012380	chr1	+	2444546	2447496	0.667957	0.696885	0.614833	1.49668	1.32054	1.12919	1.38516	1.48176	1.15983	1.21223	0.941869	0.842372	PPR containing plant-like protein	PF01535(PPR repeat)	PTHR24015(FAMILY NOT NAMED)					AT4G21065.1	Tetratricopeptide repeat (TPR)-like superfamily protein
Medtr1g012390	chr1	-	2447667	2451099	0	0.127788	0.038096	0.100728	0.076288	0.084256	0.086658	0.035759	0	0	0	0.059354	polygalacturonase	PF00295(Glycosyl hydrolases family 28)					GO:0004650(molecular_function: polygalacturonase activity), GO:0005975(biological_process: carbohydrate metabolic process)	AT4G35670.1	Pectin lyase-like superfamily protein
Medtr1g012420	chr1	-	2455302	2463886	22.3612	23.9901	21.3764	25.5511	23.3938	23.6753	24.1481	23.4496	24.257	29.2986	27.6431	29.1564	DEAD-box ATP-dependent RNA helicase-like protein	PF00271(Helicase conserved C-terminal domain), PF00270(DEAD/DEAH box helicase)	PTHR24031:SF5(), PTHR24031(RNA HELICASE)	KOG0329(ATP-dependent RNA helicase)			GO:0003676(molecular_function: nucleic acid binding), GO:0005524(molecular_function: ATP binding), GO:0008026(molecular_function: ATP-dependent helicase activity), GO:0004386(molecular_function: helicase activity)	AT5G11170.1	DEAD/DEAH box RNA helicase family protein
Medtr1g012430	chr1	-	2466106	2467356	0.066348	0.165236	0.142386	0.053325	0	0.033798	0	0.074166	0.018434	0	0.044917	0	alpha/beta hydrolase fold protein	PF07859(alpha/beta hydrolase fold)	PTHR23024:SF10(), PTHR23024(MEMBER OF 'GDXG' FAMILY OF LIPOLYTIC ENZYMES)	KOG1515(Arylacetamide deacetylase)			GO:0016787(molecular_function: hydrolase activity), GO:0008152(biological_process: metabolic process)	AT5G16080.1	carboxyesterase 17
Medtr1g012440	chr1	-	2468189	2472129	6.68756	6.65777	5.42377	6.71816	6.37211	7.02332	5.99432	6.76773	7.22525	8.94947	10.1476	13.1114	IDS4-like protein	PF03105(SPX domain)	PTHR10783:SF5(), PTHR10783(XENOTROPIC AND POLYTROPIC RETROVIRUS RECEPTOR 1-RELATED)	KOG1161(Protein involved in vacuolar polyphosphate accumulation, contains SPX domain)				AT2G26660.1	SPX domain gene 2
Medtr1g012470	chr1	-	2480152	2480838	0	0	0.09577	0	0	0	0	0	0	0	0	0	ethylene response factor	PF00847(AP2 domain)					GO:0003700(molecular_function: sequence-specific DNA binding transcription factor activity), GO:0006355(biological_process: regulation of transcription, DNA-templated)	AT1G15360.1	Integrase-type DNA-binding superfamily protein
Medtr1g012480	chr1	+	2486581	2488908	1.03692	0.954138	1.23685	1.02646	1.0561	1.11031	0.791797	0.678651	0.709564	0.748322	1.29418	0.978077	DUF4050 family protein							AT5G25360.1
Medtr1g012510	chr1	-	2499936	2501067	0	0	0	0	0	0	0	0	0	0	0	0	hypothetical protein
Medtr1g012520	chr1	+	2502649	2506197	24.5832	31.0283	37.7671	31.4966	26.3986	28.9949	26.8595	23.8477	30.7338	38.5375	32.1812	45.1593	EIN3-binding F-box-like protein	PF00646(F-box domain), PF00560(Leucine Rich Repeat)	PTHR23125:SF106(), PTHR23125()	KOG1947(Leucine rich repeat proteins, some proteins contain F-box)		K14515(Signal transduction: Plant hormone signal transduction [PATH:ko04075]: EBF1_2; EIN3-binding F-box protein)	GO:0005515(molecular_function: protein binding)	AT2G25490.1	EIN3-binding F box protein 1
Medtr1g012530	chr1	-	2514968	2520568	22.117	20.6732	19.2555	21.3209	22.6008	20.2861	18.7425	20.015	22.2132	16.8675	17.9926	17.181	TPX2 (targeting protein for Xklp2) family protein	PF06886(Targeting protein for Xklp2 (TPX2))						AT4G32330.2	TPX2 (targeting protein for Xklp2) protein family
Medtr1g012540	chr1	+	2520782	2526307	10.8915	9.40885	8.97595	10.8917	12.1387	11.8789	13.4205	12.1172	11.8022	15.5012	14.5693	13.1044	N-acetyl-gamma-glutamyl-phosphate reductase	PF01118(Semialdehyde dehydrogenase, NAD binding domain), PF02774(Semialdehyde dehydrogenase, dimerisation domain)	PTHR14097(FAMILY NOT NAMED), PTHR14097:SF7(OXIDOREDUCTASE HTATIP2)	KOG4354(N-acetyl-gamma-glutamyl-phosphate reductase)	1.2.1.-(), 1.2.1.38(N-acetyl-gamma-glutamyl-phosphate reductase.)	K00145(Amino acid metabolism: Arginine biosynthesis [PATH:ko00220]: argC; N-acetyl-gamma-glutamyl-phosphate reductase)	GO:0016620(molecular_function: oxidoreductase activity, acting on the aldehyde or oxo group of donors, NAD or NADP as acceptor), GO:0051287(molecular_function: NAD binding), GO:0055114(biological_process: oxidation-reduction process), GO:0003942(molecular_function: N-acetyl-gamma-glutamyl-phosphate reductase activity), GO:0046983(molecular_function: protein dimerization activity), GO:0008652(biol…	AT2G19940.1	oxidoreductases, acting on the aldehyde or oxo group of donors, NAD or NADP as acceptor;copper ion binding
Medtr1g012550	chr1	-	2527615	2531238	6.63447	5.58568	6.29312	6.73319	5.68583	7.27331	6.33816	7.23902	7.1932	6.47098	6.5601	6.01287	G-type lectin S-receptor-like Serine/Threonine-kinase SD2-5	PF00954(S-locus glycoprotein domain), PF00069(Protein kinase domain), PF01453(D-mannose binding lectin)	PTHR24420(), PTHR24420:SF926()	KOG1187(Serine/threonine protein kinase)			GO:0004672(molecular_function: protein kinase activity), GO:0005524(molecular_function: ATP binding), GO:0006468(biological_process: protein phosphorylation), GO:0048544(biological_process: recognition of pollen)	AT4G32300.1	S-domain-2 5
Medtr1g012590	chr1	+	2543649	2548731	15.8507	15.2834	12.3663	12.6561	15.1971	13.6013	10.1852	9.30119	10.983	14.6431	14.1656	15.8337	UDP-sugar transporter-like protein		PTHR11132(SOLUTE CARRIER FAMILY 35)	KOG1444(Nucleotide-sugar transporter VRG4/SQV-7)				AT4G32272.1	Nucleotide/sugar transporter family protein
Medtr1g012600	chr1	+	2549497	2554775	0.8241	0.549112	0.682507	0.81158	0.935518	0.604412	0.639044	0.726399	0.756192	2.26012	2.26086	3.79031	hypothetical protein		PTHR14942(FAMILY NOT NAMED)					AT4G32270.1	Ubiquitin-like superfamily protein
Medtr1g012610	chr1	+	2557243	2561512	14.0253	12.4934	14.1965	11.7421	16.279	16.1923	10.5823	12.4015	12.6867	21.5949	32.1943	67.6729	tyrosine kinase family protein	PF07714(Protein tyrosine kinase)	PTHR22967:SF2(), PTHR22967(SERINE/THREONINE PROTEIN KINASE)	KOG0198(MEKK and related serine/threonine protein kinases)			GO:0004672(molecular_function: protein kinase activity), GO:0006468(biological_process: protein phosphorylation)	AT4G32250.1	Protein kinase superfamily protein
Medtr1g012620	chr1	-	2563081	2566298	2.30664	3.89795	4.14841	5.49988	8.94687	6.01689	3.65791	3.71482	4.56784	6.91224	6.28597	10.5487	myosin heavy chain-like protein							AT4G32190.1	Myosin heavy chain-related protein
Medtr1g012630	chr1	-	2578208	2578840	0.267064	0.127637	0.385852	0.408161	0.146417	0.182274	0.074068	0.16335	0.286348	0	0.039848	0	Lipid transfer protein	PF00234(Protease inhibitor/seed storage/LTP family)						AT2G45180.1	Bifunctional inhibitor/lipid-transfer protein/seed storage 2S albumin superfamily protein
Medtr1g012650	chr1	-	2583235	2583786	0	0	0	0	0	0	0	0	0	0	0	0	hypothetical protein
Medtr1g012690	chr1	-	2591957	2592421	0.148947	0.367029	0.367489	0.58837	0.106776	0.812279	0.090485	0.201692	0.168287	0.367783	0.120841	0.356785	Lipid transfer protein	PF00234(Protease inhibitor/seed storage/LTP family)						AT2G45180.1	Bifunctional inhibitor/lipid-transfer protein/seed storage 2S albumin superfamily protein
Medtr1g012700	chr1	-	2599711	2600229	1.43355	2.02979	4.25207	2.85089	1.67416	1.48943	1.93162	1.31764	1.37625	0.120782	0.051367	0.108108	Lipid transfer protein	PF00234(Protease inhibitor/seed storage/LTP family)						AT2G45180.1	Bifunctional inhibitor/lipid-transfer protein/seed storage 2S albumin superfamily protein
Medtr1g012710	chr1	-	2607695	2608833	112.735	108.812	192.548	31.5752	24.49	15.1264	45.7354	18.1421	9.65735	2.32388	3.61187	0.679882	protease inhibitor/seed storage/LTP family protein	PF00234(Protease inhibitor/seed storage/LTP family)						AT4G12490.1	Bifunctional inhibitor/lipid-transfer protein/seed storage 2S albumin superfamily protein
Medtr1g012740	chr1	+	2621388	2624168	0	0	0	0	0	0	0	0	0	0	0	0	ACT domain protein, putative		PTHR13734(TRNA-NUCLEOTIDYLTRANSFERASE/POLY A POLYMERASE FAMILY MEMBER), PTHR13734:SF23()					AT5G25320.1	ACT-like superfamily protein
Medtr1g012760	chr1	-	2628216	2632552	0.201273	0.316684	0.169989	0.739574	0.631266	0.705006	0.590241	0.810904	0.442126	0.319542	0.150829	0.205922	FAR1 DNA-binding domain protein	PF03101(FAR1 DNA-binding domain)
Medtr1g012790	chr1	+	2638726	2643687	8.68793	7.7245	6.79728	7.91187	7.39689	7.0593	5.78826	5.42183	7.13951	9.27794	8.44798	12.547	nodulin MtN21/EamA-like transporter family protein	PF00892(EamA-like transporter family)	PTHR23051(SOLUTE CARRIER FAMILY 35, MEMBER F5)	KOG4314(Predicted carbohydrate/phosphate translocator)			GO:0016020(cellular_component: membrane)	AT4G32140.1	EamA-like transporter family
Medtr1g012800	chr1	+	2645517	2652054	25.4548	23.0512	22.6158	24.2828	24.6773	19.6681	24.0099	23.3202	23.8721	32.079	30.6637	26.5658	beta-1,3-galactosyltransferase-like protein	PF01762(Galactosyltransferase)	PTHR11214(BETA-1,3-N-ACETYLGLUCOSAMINYLTRANSFERASE), PTHR11214:SF6()	KOG2288(Galactosyltransferases)			GO:0008378(molecular_function: galactosyltransferase activity), GO:0006486(biological_process: protein glycosylation), GO:0016020(cellular_component: membrane)	AT4G32120.1	Galactosyltransferase family protein
Medtr1g012820	chr1	+	2656746	2664018	0	0	0	0	0	0	0	0	0.023904	0	0	0	topless-like protein	PF00400(WD domain, G-beta repeat)	PTHR19932:SF11(), PTHR19932(WD REPEAT AND HMG-BOX DNA BINDING PROTEIN)	KOG0275(Conserved WD40 repeat-containing protein)			GO:0005515(molecular_function: protein binding)	AT1G80490.1	TOPLESS-related 1
Medtr1g012830	chr1	-	2667014	2671074	16.5349	19.4879	16.8003	19.4982	20.5533	22.1772	18.0164	20.8429	19.8753	27.2763	28.3534	35.678	AmmeMemoRadiSam system protein B	PF01875(Memo-like protein)	PTHR11060(PROTEIN MEMO1)	KOG3086(Predicted dioxygenase)				AT2G25280.1
Medtr1g012840	chr1	-	2671775	2677409	10.1735	12.2539	8.47298	8.80392	11.0592	10.0563	9.38572	9.88358	10.5684	13.5086	12.883	14.06	octicosapeptide/phox/Bem1p domain protein	PF00564(PB1 domain)	PTHR22904(TPR REPEAT CONTAINING PROTEIN), PTHR22904:SF25()	KOG4151(Myosin assembly protein/sexual cycle protein and related proteins)			GO:0005515(molecular_function: protein binding)	AT2G25290.1	Octicosapeptide/Phox/Bem1p (PB1) domain-containing protein / tetratricopeptide repeat (TPR)-containing protein
Medtr1g012850	chr1	-	2678294	2683696	16.9345	16.3508	13.5285	16.2477	16.492	15.9646	13.0132	12.5588	14.0905	15.7883	15.1011	15.2106	calcium-binding EF hand protein	PF00036(EF hand)	PTHR12294:SF1(CALCIUM UPTAKE PROTEIN 1, MITOCHONDRIAL), PTHR12294(EF HAND DOMAIN FAMILY A1,A2-RELATED)	KOG2643(Ca2+ binding protein, contains EF-hand motifs)			GO:0005509(molecular_function: calcium ion binding)	AT4G32060.1	calcium-binding EF hand family protein
Medtr1g012860	chr1	+	2693422	2693808	1.50952	1.11678	1.59594	1.34931	1.06334	1.56424	0.906439	1.97289	1.088	1.35074	0.85487	0.725828	hypothetical protein
Medtr1g012870	chr1	+	2693838	2700611	4.79797	4.41655	4.0643	5.0071	5.38249	5.34522	4.09588	4.61916	4.67538	4.10963	4.04097	4.93826	hypothetical protein
Medtr1g012890	chr1	+	2706411	2711112	6.12211	6.64484	5.90205	10.0935	9.44915	8.9701	6.68942	8.15953	8.38038	5.17192	8.14286	6.99042	mixed-lineage leukemia protein, mll protein, putative	PF00856(SET domain)	PTHR22884(SET DOMAIN PROTEINS), PTHR22884:SF73()			K09188(Replication and repair: Chromosome and associated proteins [BR:ko03036]: MLL3; histone-lysine N-methyltransferase MLL3)	GO:0005515(molecular_function: protein binding)	AT3G61740.1	SET domain protein 14
MT4Noble_000391	chr1	+	2713359	2714628	1.99891	2.66427	3.21744	1.42293	3.35911	2.19923	1.72419	1.53708	1.87618	1.54306	3.08659	1.71943	Histone-lysine N-methyltransferase trr
MT4Noble_000392	chr1	+	2714734	2715501	2.49353	1.95208	2.18452	1.97095	1.78411	1.82465	2.26364	1.6467	1.4645	1.55452	2.19642	1.88101	Histone-lysine N-methyltransferase ATX2
Medtr1g012910	chr1	+	2715810	2724787	5.92848	4.65056	5.40639	6.02512	6.49111	6.62414	5.71058	6.47836	6.30942	7.05717	4.79323	6.05959	PHD-zinc-finger-like domain protein	PF00856(SET domain)	PTHR22884:SF73(), PTHR22884(SET DOMAIN PROTEINS)			K09188(Replication and repair: Chromosome and associated proteins [BR:ko03036]: MLL3; histone-lysine N-methyltransferase MLL3)	GO:0005515(molecular_function: protein binding)	AT3G61740.2	SET domain protein 14
Medtr1g012920	chr1	-	2725208	2729896	64.5327	74.6143	61.1994	47.3101	54.8624	54.3229	44.2143	39.1986	46.6756	56.0113	57.4109	53.4751	transmembrane protein, putative							AT5G25265.1
Medtr1g012950	chr1	+	2737894	2738674	2.28964	2.75668	2.196	0.924761	2.65907	0.581791	0.538209	0.936333	0.352753	1.42535	0.981842	1.14285	hypothetical protein							AT5G35090.1
Medtr1g012960	chr1	-	2743275	2747519	53.252	73.1777	66.252	58.185	70.0594	64.4532	50.2127	50.7638	63.8566	84.7799	81.6621	97.9763	class II knotted-like homeobox protein	PF00046(Homeobox domain), PF03790(KNOX1 domain ), PF03789(ELK domain ), PF03791(KNOX2 domain )	PTHR11850:SF15(), PTHR11850(HOMEOBOX PROTEIN TRANSCRIPTION FACTORS)	KOG0773(Transcription factor MEIS1 and related HOX domain proteins)			GO:0003700(molecular_function: sequence-specific DNA binding transcription factor activity), GO:0043565(molecular_function: sequence-specific DNA binding), GO:0006355(biological_process: regulation of transcription, DNA-templated), GO:0003677(molecular_function: DNA binding), GO:0005634(cellular_component: nucleus)	AT5G25220.2	KNOTTED1-like homeobox gene 3
Medtr1g012980	chr1	-	2767536	2775362	7.46624	7.10357	6.08634	6.3243	7.37548	6.31755	7.09157	6.55955	5.95618	7.1293	6.54623	7.17866	transporter TRS120	PF08626(Transport protein Trs120 or TRAPPC9, TRAPP II complex subunit)	PTHR21512(FAMILY NOT NAMED), PTHR21512:SF5(TRAFFICKING PROTEIN PARTICLE COMPLEX SUBUNIT 9)	KOG1953(Targeting complex (TRAPP) subunit)				AT5G11040.1	TRS120
Medtr1g012990	chr1	+	2777429	2782161	15.3685	16.7492	15.7117	25.9077	29.9352	23.6372	24.2144	24.4529	27.7442	21.8844	20.8595	19.6632	ribosomal RNA processing brix domain protein	PF04427(Brix domain)	PTHR13634(RIBOSOME BIOGENESIS PROTEIN BRIX)	KOG2971(RNA-binding protein required for biogenesis of the ribosomal 60S subunit)				AT3G15460.1	Ribosomal RNA processing Brix domain protein
Medtr1g013000	chr1	-	2785071	2786873	0	0	0	0	0	0	0	0	0	0.031968	0	0	mediator of RNA polymerase II transcription subunit 25	PF11265(Mediator complex subunit 25 von Willebrand factor type A)	PTHR12433:SF5(), PTHR12433(PROSTATE TUMOR OVEREXPRESSED GENE 1 PTOV1)					AT1G25540.1	phytochrome and flowering time regulatory protein (PFT1)
Medtr1g013030	chr1	+	2798487	2801061	0.033428	0	0	0	0.293234	0.021021	0	0.283964	0	0	0.288079	0.007989	aberrant root formation protein	PF08568(Uncharacterised protein family, YAP/Alf4/glomulin)						AT5G11030.3	aberrant lateral root formation 4
Medtr1g013040	chr1	+	2805858	2810409	3.11245	2.71051	2.52838	1.92008	2.3572	2.26125	3.03089	2.18009	2.28106	1.68364	1.77602	1.5779	Serine/Threonine kinase family protein	PF00069(Protein kinase domain)	PTHR24420(), PTHR24420:SF449()	KOG1187(Serine/threonine protein kinase)			GO:0004672(molecular_function: protein kinase activity), GO:0005524(molecular_function: ATP binding), GO:0006468(biological_process: protein phosphorylation)	AT2G25220.1	Protein kinase superfamily protein
Medtr1g013050	chr1	-	2810795	2814996	62.0233	55.8105	54.2349	93.0966	94.0945	101.671	132.587	119.55	106.881	85.0188	81.1861	69.0091	aspartate aminotransferase	PF00155(Aminotransferase class I and II)	PTHR11879(ASPARTATE AMINOTRANSFERASE)	KOG1411(Aspartate aminotransferase/Glutamic oxaloacetic transaminase AAT1/GOT2)	2.6.1.1(Aspartate transaminase.)	K00813(Biosynthesis of other secondary metabolites: Novobiocin biosynthesis [PATH:ko00401]: aspC; aspartate aminotransferase)	GO:0030170(molecular_function: pyridoxal phosphate binding), GO:0009058(biological_process: biosynthetic process)	AT4G31990.1	aspartate aminotransferase 5
Medtr1g013060	chr1	+	2821436	2822814	0.059786	0.015164	0.172553	0	0.010508	0.030302	0.064711	0.075421	0.265993	0.302936	0.187303	0	FAR1 DNA-binding domain protein	PF03101(FAR1 DNA-binding domain)						AT4G38180.1	FAR1-related sequence 5
Medtr1g013070	chr1	+	2830816	2831740	81.6034	87.1361	74.2664	111.014	101.581	86.0912	134.858	126.949	69.7887	104.958	105.896	79.9033	60S ribosomal protein L39-3	PF00832(Ribosomal L39 protein)	PTHR19970(RIBOSOMAL PROTEIN L39E)	KOG0002(60s ribosomal protein L39)		K02924(Translation: Ribosome [BR:ko03011]: RP-L39e, RPL39; large subunit ribosomal protein L39e)	GO:0003735(molecular_function: structural constituent of ribosome), GO:0006412(biological_process: translation), GO:0005622(cellular_component: intracellular), GO:0005840(cellular_component: ribosome)	AT4G31985.1	Ribosomal protein L39 family protein
Medtr1g013090	chr1	-	2839234	2840182	1.02497	0.744542	0.95305	2.10097	2.76507	1.31159	2.96546	2.67091	1.97269	5.51498	4.61406	6.39666	ubiquitin family protein	PF00240(Ubiquitin family)					GO:0005515(molecular_function: protein binding)	AT4G03430.1	pre-mRNA splicing factor-related
Medtr1g013100	chr1	+	2847473	2848519	0.026815	0.117815	0.079313	0.11329	0	0.044123	0	0.182994	0	0.199912	0.249927	3.18147	DUF868 family protein	PF05910(Plant protein of unknown function (DUF868))						AT5G11000.1	Plant protein of unknown function (DUF868)
Medtr1g013110	chr1	-	2851524	2854466	9.43667	10.1548	11.8156	12.9223	12.8391	12.0797	9.73789	12.4066	12.2332	15.1963	15.9502	23.8256	PPPDE thiol peptidase family protein, putative	PF05903(PPPDE putative peptidase domain)	PTHR12378(UNCHARACTERIZED), PTHR12378:SF2()	KOG0324(Uncharacterized conserved protein)				AT5G25170.1	PPPDE putative thiol peptidase family protein
Medtr1g013120	chr1	+	2858294	2861439	11.8965	9.08501	9.38977	11.5321	8.73358	9.98587	12.059	10.4041	10.1755	15.2317	15.0308	14.2723	glycoprotein family protein	PF02330(Mitochondrial glycoprotein)	PTHR10826:SF1(COMPLEMENT COMPONENT 1 Q SUBCOMPONENT-BINDING PROTEIN, MITOCHONDRIAL), PTHR10826(COMPLEMENT COMPONENT 1)	KOG2536(MAM33, mitochondrial matrix glycoprotein)			GO:0005759(cellular_component: mitochondrial matrix)	AT4G31930.1	Mitochondrial glycoprotein family protein
Medtr1g013130	chr1	-	2866484	2867657	2.54508	2.39895	3.33851	7.27583	6.57304	5.40804	10.0401	11.189	9.32112	14.3162	11.0558	11.2817	zinc finger-like protein		PTHR10042:SF14(), PTHR10042()					AT5G10970.1	C2H2 and C2HC zinc fingers superfamily protein
Medtr1g013150	chr1	+	2878531	2880391	3.17488	2.90581	2.58217	3.06248	2.87877	4.48712	3.05433	1.70139	2.26102	3.83352	6.8476	5.57567	glycoside hydrolase family 18 protein	PF00704(Glycosyl hydrolases family 18)	PTHR11177(CHITINASE), PTHR11177:SF22()	KOG2806(Chitinase)			GO:0004553(molecular_function: hydrolase activity, hydrolyzing O-glycosyl compounds), GO:0005975(biological_process: carbohydrate metabolic process)	AT4G19810.1	Glycosyl hydrolase family protein with chitinase insertion domain
Medtr1g013160	chr1	+	2888569	2889253	0	0	0	0	0	0	0	0	0	0	0	0	two-component response regulator ARR12-like protein	PF00072(Response regulator receiver domain)	PTHR26402(RESPONSE REGULATOR OF TWO-COMPONENT SYSTEM), PTHR26402:SF38()				GO:0000156(molecular_function: phosphorelay response regulator activity), GO:0000160(biological_process: phosphorelay signal transduction system), GO:0006355(biological_process: regulation of transcription, DNA-templated)	AT2G25180.1	response regulator 12
Medtr1g013170	chr1	+	2892386	2894964	0	0	0	0	0	0	0	0	0	0	0	0.032268	response regulator	PF00072(Response regulator receiver domain), PF00249(Myb-like DNA-binding domain)	PTHR26402:SF38(), PTHR26402(RESPONSE REGULATOR OF TWO-COMPONENT SYSTEM)				GO:0000156(molecular_function: phosphorelay response regulator activity), GO:0000160(biological_process: phosphorelay signal transduction system), GO:0006355(biological_process: regulation of transcription, DNA-templated), GO:0003682(molecular_function: chromatin binding)	AT2G25180.1	response regulator 12
Medtr1g013180	chr1	+	2902323	2906821	0	0	0	0	0	0	0	0	0.023219	0	0.054928	0	response regulator	PF00072(Response regulator receiver domain), PF00249(Myb-like DNA-binding domain)	PTHR26402:SF38(), PTHR26402(RESPONSE REGULATOR OF TWO-COMPONENT SYSTEM)				GO:0000156(molecular_function: phosphorelay response regulator activity), GO:0000160(biological_process: phosphorelay signal transduction system), GO:0006355(biological_process: regulation of transcription, DNA-templated), GO:0003682(molecular_function: chromatin binding)	AT2G25180.1	response regulator 12
Medtr1g013190	chr1	-	2909567	2920951	0	0.003113	0	0	0.039629	0.001695	0	0	0	0	0	0	chromatin remodeling factor CHD3 (pickle)	PF08074(CHDCT2 (NUC038) domain), PF00271(Helicase conserved C-terminal domain), PF00385(Chromo (CHRromatin Organisation MOdifier) domain), PF00176(SNF2 family N-terminal domain), PF06461(Domain of Unknown Function (DUF1086)), PF06465(Domain of Unknown Function (DUF1087))	PTHR10799(SWI/SNF-RELATED MATRIX-ASSOCIATED ACTIN-DEPENDENT REGULATOR OF CHROMATIN SUBFAMILY-RELATED), PTHR10799:SF131()	KOG0384(Chromodomain-helicase DNA-binding protein)			GO:0003677(molecular_function: DNA binding), GO:0005524(molecular_function: ATP binding), GO:0003676(molecular_function: nucleic acid binding), GO:0004386(molecular_function: helicase activity), GO:0008270(molecular_function: zinc ion binding), GO:0016818(molecular_function: hydrolase activity, acting on acid anhydrides, in phosphorus-containing anhydrides), GO:0006355(biological_process: regulat…	AT2G25170.1	chromatin remodeling factor CHD3 (PICKLE)
Medtr1g014390	chr1	-	2927816	2929594	0	0	0	0	0	0	0	0	0	0	0	0	M48 family peptidase	PF01435(Peptidase family M48)	PTHR22726(OMA1 HOMOLOG, ZINC METALLOPEPTIDASE)				GO:0004222(molecular_function: metalloendopeptidase activity), GO:0006508(biological_process: proteolysis), GO:0016020(cellular_component: membrane)	AT5G51740.1	Peptidase family M48 family protein
Medtr1g014450	chr1	-	2947078	2948790	0	0	0	0	0	0	0	0	0	0	0	0	F-box/FBD-like domain protein	PF00646(F-box domain)					GO:0005515(molecular_function: protein binding)	AT1G13570.1	F-box/RNI-like superfamily protein
Medtr1g014420	chr1	+	2983258	2986358	1.48091	0.750374	1.56486	0.864594	0.56044	1.37753	1.00683	1.2205	0.978486	0.434974	0.193109	0.302594	armadillo/beta-catenin-like repeat protein		PTHR23315:SF38(), PTHR23315(BETA CATENIN-RELATED ARMADILLO REPEAT-CONTAINING)					AT4G31890.1	ARM repeat superfamily protein
Medtr1g014340	chr1	+	3000992	3003085	0.894068	1.10277	0.862287	1.13333	0.887583	1.05117	1.12096	1.05823	1.2048	1.04344	0.860216	0.96422	PPR containing plant-like protein	PF01535(PPR repeat)	PTHR24015(FAMILY NOT NAMED), PTHR24015:SF111(SUBFAMILY NOT NAMED)					AT5G27110.1	Tetratricopeptide repeat (TPR)-like superfamily protein
Medtr1g014330	chr1	-	3004193	3004578	0.459407	0.848933	0.469022	1.03884	0.59854	0.904215	0.677857	1.42055	0.592364	0.712494	0.736457	0.491201	hypothetical protein
Medtr1g014320	chr1	+	3005984	3010195	0.339891	0.333493	0.031831	0.643058	0.662593	0.586918	0.230315	0.189654	0.335095	1.07621	0.883744	1.11276	NADP-dependent glyceraldehyde-3-phosphate dehydrogenase	PF00171(Aldehyde dehydrogenase family)	PTHR11699(ALDEHYDE DEHYDROGENASE-RELATED), PTHR11699:SF29(NADP-DEPENDENT GLYCERALDEHYDE-3-PHOSPHATE DEHYDROGENASE)	KOG2450(Aldehyde dehydrogenase)	1.2.1.9(Glyceraldehyde-3-phosphate dehydrogenase (NADP(+)).)	K00131(Carbohydrate metabolism: Pentose phosphate pathway [PATH:ko00030]: gapN; glyceraldehyde-3-phosphate dehydrogenase (NADP+))	GO:0016491(molecular_function: oxidoreductase activity), GO:0008152(biological_process: metabolic process), GO:0055114(biological_process: oxidation-reduction process)	AT2G24270.4	aldehyde dehydrogenase 11A3
Medtr1g014280	chr1	+	3020470	3027002	0	0	0	0.026109	0	0	0.006274	0.069904	0.082837	0	0.29079	0	hypothetical protein							AT5G47690.3	binding
MT4Noble_000429	chr1	+	3020834	3021585	0	0	0	0.099837	0	0.148319	0.437799	0.109718	0.076137	0	0	0	Nucleic acid-binding protein, putative
Medtr1g014270	chr1	+	3029508	3039200	25.742	26.679	26.6286	26.528	27.4337	25.9464	21.4594	23.8778	27.2708	29.5349	27.3418	32.111	lamin-B receptor of tudor domain protein	PF09465(Lamin-B receptor of TUDOR domain)	PTHR12663(ANDROGEN INDUCED INHIBITOR OF PROLIFERATION AS3 / PDS5-RELATED)					AT4G31880.1
Medtr1g014260	chr1	+	3041217	3044340	4.40787	3.81632	3.25534	4.2921	4.64599	4.78454	4.35288	4.64604	4.55576	5.55876	5.36619	5.46364	ubiquitin carboxyl-terminal hydrolase	PF00443(Ubiquitin carboxyl-terminal hydrolase), PF02148(Zn-finger in ubiquitin-hydrolases and other protein)	PTHR24006(FAMILY NOT NAMED), PTHR24006:SF57()	KOG1867(Ubiquitin-specific protease)	3.1.2.15(Deleted entry.)	K11366(Replication and repair: Chromosome and associated proteins [BR:ko03036]: USP22_27_51, UBP8; ubiquitin carboxyl-terminal hydrolase 22/27/51)	GO:0004843(molecular_function: ubiquitin-specific protease activity), GO:0006511(biological_process: ubiquitin-dependent protein catabolic process), GO:0008270(molecular_function: zinc ion binding)	AT5G10790.1	ubiquitin-specific protease 22
Medtr1g014250	chr1	+	3049359	3053635	7.50684	6.7702	5.95218	9.09465	7.6588	8.73671	9.76863	7.27568	8.659	8.6911	9.187	8.68565	folate/biopterin transporter	PF03092(BT1 family)	PTHR24003:SF331(), PTHR24003()					AT5G25050.1	Major facilitator superfamily protein
Medtr1g014240	chr1	-	3054077	3056113	3.1648	4.25799	3.46864	7.95751	5.70104	5.0223	5.195	6.02687	5.79861	4.71911	4.78528	3.96504	lectin receptor kinase	PF00069(Protein kinase domain), PF00139(Legume lectin domain)	PTHR24420:SF438(), PTHR24420()	KOG1187(Serine/threonine protein kinase)			GO:0004672(molecular_function: protein kinase activity), GO:0005524(molecular_function: ATP binding), GO:0006468(biological_process: protein phosphorylation), GO:0030246(molecular_function: carbohydrate binding)	AT5G10530.1	Concanavalin A-like lectin protein kinase family protein
Medtr1g014230	chr1	-	3058202	3061270	29.1382	28.1005	27.5936	31.7913	25.6124	27.315	35.4354	26.1405	27.8087	28.2179	28.0729	25.2057	enhancer of rudimentary-like protein	PF01133(Enhancer of rudimentary)	PTHR12373(ENHANCER OF RUDIMENTARY ERH)	KOG1766(Enhancer of rudimentary)			GO:0007049(biological_process: cell cycle)	AT5G10810.1	enhancer of rudimentary protein, putative
Medtr1g014220	chr1	-	3062193	3065434	6.90527	8.80858	6.93048	5.6286	4.81021	4.60004	3.93868	4.27705	4.5217	6.05241	6.98121	5.6377	folate/biopterin transporter	PF03092(BT1 family)	PTHR24003:SF331(), PTHR24003()					AT5G10820.1	Major facilitator superfamily protein
Medtr1g014210	chr1	-	3066377	3070739	243.022	217.181	207.264	281.171	280.511	276.8	280.628	270.995	280.021	246.518	215.185	190.293	phospholipid hydroperoxide glutathione peroxidase	PF00255(Glutathione peroxidase)	PTHR11592(GLUTATHIONE PEROXIDASE)	KOG1651(Glutathione peroxidase)	1.11.1.9(Glutathione peroxidase.)	K00432(Endocrine system: Thyroid hormone synthesis [PATH:ko04918]: gpx; glutathione peroxidase)	GO:0004602(molecular_function: glutathione peroxidase activity), GO:0006979(biological_process: response to oxidative stress), GO:0055114(biological_process: oxidation-reduction process)	AT2G25080.1	glutathione peroxidase 1
Medtr1g014190	chr1	+	3077750	3082294	55.372	50.5479	52.1664	62.6006	66.3319	59.241	57.004	50.0966	55.5736	41.4798	39.1128	30.6379	protein phosphatase 2C-like protein	PF00481(Protein phosphatase 2C)	PTHR13832(PROTEIN PHOSPHATASE 2C), PTHR13832:SF140()	KOG0697(Protein phosphatase 1B (formerly 2C))			GO:0003824(molecular_function: catalytic activity)	AT4G31860.1	Protein phosphatase 2C family protein
Medtr1g014180	chr1	-	3082720	3083692	0.074002	0.215331	0.2143	0.371176	1.08259	0.94993	0.358181	0.318418	0.123432	0.615987	2.2906	2.8611	tubby C 2 protein	PF04525(LURP-one-related)						AT5G01750.2	Protein of unknown function (DUF567)
Medtr1g014160	chr1	-	3091946	3095952	0	0	0	0	0	0	0.0468	0	0	0	0	0	tubby C 2 protein	PF04525(LURP-one-related)						AT3G11740.1	Protein of unknown function (DUF567)
Medtr1g014150	chr1	-	3098026	3099896	0	0	0	0	0	0	0	0	0	0	0	0	tubby C 2 protein	PF04525(LURP-one-related)						AT5G01750.2	Protein of unknown function (DUF567)
Medtr1g014140	chr1	+	3102208	3107666	40.8428	44.4047	36.8681	36.6105	39.0237	37.2036	37.4746	30.4964	31.9583	31.2364	32.9769	28.129	aspartate-tRNA ligase	PF01336(OB-fold nucleic acid binding domain), PF00152(tRNA synthetases class II (D, K and N) )	PTHR22594:SF10(SUBFAMILY NOT NAMED), PTHR22594(ASPARTYL/LYSYL-TRNA SYNTHETASE)	KOG0556(Aspartyl-tRNA synthetase)	6.1.1.12(Aspartate--tRNA ligase.)	K01876(Translation: Mitochondrial biogenesis [BR:ko03029]: DARS, aspS; aspartyl-tRNA synthetase)	GO:0000166(molecular_function: nucleotide binding), GO:0004812(molecular_function: aminoacyl-tRNA ligase activity), GO:0005524(molecular_function: ATP binding), GO:0006418(biological_process: tRNA aminoacylation for protein translation), GO:0003676(molecular_function: nucleic acid binding)	AT4G31180.1	Class II aminoacyl-tRNA and biotin synthetases superfamily protein
Medtr1g014130	chr1	+	3109176	3113524	5.4602	3.94707	4.3033	6.14194	6.84439	6.59395	6.65001	6.06908	8.0265	8.11001	7.78083	6.085	Sas10/Utp3/C1D family protein	PF04000(Sas10/Utp3/C1D family)						AT5G25080.1	Sas10/Utp3/C1D family
Medtr1g014120	chr1	-	3114127	3115335	0.446086	0.534413	0.473177	0.549748	0.145762	0.65408	0.420047	0.328276	0.108914	0.205287	0.750792	0.453579	plastocyanin-like domain protein	PF02298(Plastocyanin-like domain)					GO:0005507(molecular_function: copper ion binding), GO:0009055(molecular_function: electron carrier activity)	AT4G31840.1	early nodulin-like protein 15
Medtr1g014110	chr1	+	3119471	3120004	0	0	0	0	0	0	0	0	0	0	0	0	transmembrane protein, putative							AT4G31830.1
Medtr1g014510	chr1	-	3122892	3126121	1.57621	1.66984	1.83676	11.5072	7.70585	6.17446	13.1013	11.6255	8.12237	6.31224	3.81818	2.88974	nodulin MtN21/EamA-like transporter family protein	PF00892(EamA-like transporter family)		KOG4510(Permease of the drug/metabolite transporter (DMT) superfamily)			GO:0016020(cellular_component: membrane)	AT5G40240.1	nodulin MtN21 /EamA-like transporter family protein
Medtr1g014080	chr1	-	3127477	3132558	35.4533	33.5384	27.1745	35.3898	29.7814	32.6135	36.2945	35.7307	37.4578	43.6901	35.8384	30.9035	endomembrane protein 70 family protein	PF02990(Endomembrane protein 70)	PTHR10766(TRANSMEMBRANE 9 SUPERFAMILY PROTEIN)	KOG1278(Endosomal membrane proteins, EMP70)			GO:0016021(cellular_component: integral component of membrane)	AT5G10840.1	Endomembrane protein 70 protein family
Medtr1g014070	chr1	+	3144219	3149289	0.469893	0.469409	0.525973	0.269898	0.342069	0.375162	0.074911	0.164795	0.119188	0.072489	0	0.054321	phototropic-responsive NPH3 family protein	PF00651(BTB/POZ domain), PF03000(NPH3 family)	PTHR13690(FAMILY NOT NAMED), PTHR13690:SF174()				GO:0005515(molecular_function: protein binding)	AT4G31820.1	Phototropic-responsive NPH3 family protein
Medtr1g014060	chr1	+	3151005	3152705	0	0	0.042027	0	0	0	0.028892	0	0	0	0	0	DUF674 family protein	PF05056(Protein of unknown function (DUF674))						AT3G09140.1	Protein of unknown function (DUF674)
Medtr1g014040	chr1	+	3159696	3169229	10.5363	11.4935	7.84555	14.0387	13.7967	14.2174	14.9949	15.3031	13.6525	12.0671	9.92213	7.50819	enoyl-CoA hydratase/isomerase	PF00378(Enoyl-CoA hydratase/isomerase)	PTHR11941(ENOYL-COA HYDRATASE-RELATED), PTHR11941:SF19(ENOYL-COA HYDRATASE/ISOMERASE DOMAIN-CONTAINING PROTEIN)	KOG1684(Enoyl-CoA hydratase)	3.1.2.4(3-hydroxyisobutyryl-CoA hydrolase.)	K05605(Metabolism of other amino acids: beta-Alanine metabolism [PATH:ko00410]: HIBCH; 3-hydroxyisobutyryl-CoA hydrolase)	GO:0003824(molecular_function: catalytic activity), GO:0008152(biological_process: metabolic process)	AT4G31810.1	ATP-dependent caseinolytic (Clp) protease/crotonase family protein
Medtr1g014030	chr1	+	3169851	3170021	0	0	0	0	0	0	0	0	0	0	0	0	hypothetical protein
Medtr1g013950	chr1	+	3192758	3193176	0	0	0	0	0	0	0	0	0	0	0	0	LCR related
Medtr1g013940	chr1	-	3194373	3194988	0	0	0	0	0	0	0	0	0	0	0	0	chorismate mutase		PTHR21145(CHORISMATE MUTASE)					AT5G10870.1	chorismate mutase 2
Medtr1g014570	chr1	+	3201576	3201994	0	0	0	0	0	0	0	0	0	0	0	0	LCR related
Medtr1g013900	chr1	-	3203191	3203806	0	0	0	0	0	0	0	0	0	0	0	0	chorismate mutase		PTHR21145(CHORISMATE MUTASE)					AT5G10870.1	chorismate mutase 2
Medtr1g014590	chr1	+	3210413	3210831	0	0	0	0	0	0	0	0	0	0	0	0	LCR related
Medtr1g013860	chr1	-	3212028	3212643	0	0	0	0	0	0	0	0	0	0	0	0	chorismate mutase		PTHR21145(CHORISMATE MUTASE)					AT5G10870.1	chorismate mutase 2
Medtr1g013840	chr1	-	3217065	3220004	0	0	0	0	0	0	0	0	0	0	0	0	F-box/RNI/FBD-like domain protein	PF07723(Leucine Rich Repeat), PF00646(F-box domain)					GO:0005515(molecular_function: protein binding)	AT1G13570.1	F-box/RNI-like superfamily protein
Medtr1g013820	chr1	-	3222059	3225818	9.19448	14.323	9.49806	8.3979	10.3803	8.36802	5.46263	5.39736	7.55191	4.66466	8.22782	5.52864	chorismate mutase		PTHR21145(CHORISMATE MUTASE)	KOG0795(Chorismate mutase)	5.4.99.5(Chorismate mutase.)	K01850(Amino acid metabolism: Phenylalanine, tyrosine and tryptophan biosynthesis [PATH:ko00400]: E5.4.99.5; chorismate mutase)		AT5G10870.1	chorismate mutase 2
Medtr1g013800	chr1	+	3233402	3244659	0.056241	0.018706	0.183082	0.060804	0.066921	0.057298	0.01162	0.039374	0.036771	0.030173	0.013227	0	actin-binding FH2 (formin 2) family protein	PF02181(Formin Homology 2 Domain), PF10409(C2 domain of PTEN tumour-suppressor protein)	PTHR23213(FORMIN-RELATED), PTHR23213:SF18()	KOG1922(Rho GTPase effector BNI1 and related formins)			GO:0005515(molecular_function: protein binding)	AT2G25050.1	Actin-binding FH2 (Formin Homology) protein
Medtr1g013790	chr1	-	3244912	3246508	13.5342	16.7489	10.1225	6.49644	7.20163	7.9426	2.2134	1.74344	2.652	5.05215	6.94896	9.1213	WRKY family transcription factor	PF03106(WRKY DNA -binding domain)					GO:0003700(molecular_function: sequence-specific DNA binding transcription factor activity), GO:0043565(molecular_function: sequence-specific DNA binding), GO:0006355(biological_process: regulation of transcription, DNA-templated)	AT1G80840.1	WRKY DNA-binding protein 40
Medtr1g013760	chr1	-	3258029	3259870	44.1228	80.4132	39.4769	5.20237	14.4603	9.6087	3.76647	2.60908	4.96659	7.39825	10.5472	9.32421	WRKY family transcription factor	PF03106(WRKY DNA -binding domain)					GO:0003700(molecular_function: sequence-specific DNA binding transcription factor activity), GO:0043565(molecular_function: sequence-specific DNA binding), GO:0006355(biological_process: regulation of transcription, DNA-templated)	AT1G80840.1	WRKY DNA-binding protein 40
Medtr1g013740	chr1	-	3272148	3276100	0	0	0	0	0	0.030638	0	0	0	0	0	0	polygalacturonase	PF00295(Glycosyl hydrolases family 28)					GO:0004650(molecular_function: polygalacturonase activity), GO:0005975(biological_process: carbohydrate metabolic process)	AT5G27530.1	Pectin lyase-like superfamily protein
MT4Noble_000468	chr1	+	3282966	3285466	2.89512	3.78931	2.61277	3.52634	3.03786	3.64334	3.63314	3.12016	3.71449	4.81576	7.12333	7.85938	PPR repeat protein
Medtr1g013700	chr1	-	3292908	3294869	34.7829	27.5242	23.896	37.8023	34.4069	42.6992	31.3181	41.4908	42.6081	40.5365	39.9705	43.017	CBL-interacting kinase	PF03822(NAF domain), PF00069(Protein kinase domain)	PTHR24345(SERINE/THREONINE-PROTEIN KINASE PLK), PTHR24345:SF45()	KOG0583(Serine/threonine protein kinase)			GO:0004672(molecular_function: protein kinase activity), GO:0005524(molecular_function: ATP binding), GO:0006468(biological_process: protein phosphorylation), GO:0007165(biological_process: signal transduction)	AT5G25110.1	CBL-interacting protein kinase 25
Medtr1g013680	chr1	-	3299843	3302326	14.5764	13.3829	14.2175	19.4846	17.5184	15.0315	18.1649	22.3128	25.228	41.5799	22.4892	26.9286	GTP-binding elongation factor Tu family protein	PF03144(Elongation factor Tu domain 2), PF03143(Elongation factor Tu C-terminal domain), PF00009(Elongation factor Tu GTP binding domain)	PTHR23115:SF57(), PTHR23115(TRANSLATION FACTOR)	KOG0052(Translation elongation factor EF-1 alpha/Tu)	3.6.5.3(Protein-synthesizing GTPase.)	K03231(Infectious diseases: Legionellosis [PATH:ko05134]: EEF1A; elongation factor 1-alpha)	GO:0003924(molecular_function: GTPase activity), GO:0005525(molecular_function: GTP binding)	AT1G07920.1	GTP binding Elongation factor Tu family protein
Medtr1g013670	chr1	-	3305210	3307823	9.56809	7.97326	10.7336	10.7935	10.9054	8.45376	11.3491	11.8854	14.7995	26.3459	12.6434	19.8272	hypothetical protein
Medtr1g013660	chr1	-	3316491	3321123	32.4846	40.2225	30.6662	31.9635	31.7954	30.0286	32.3463	28.7966	30.9684	37.4405	35.9079	30.6896	ER membrane protein complex subunit-like protein	PF06417(Protein of unknown function (DUF1077))	PTHR19315:SF4(), PTHR19315(FAMILY NOT NAMED)	KOG3318(Predicted membrane protein)				AT5G10780.1
Medtr1g014610	chr1	+	3317763	3318313	0.418614	0.056054	0.231595	0	0	0.099883	0.09378	0.223364	0	0.061275	0	0.471584	hypothetical protein
Medtr1g013650	chr1	-	3322974	3329019	20.5238	20.1337	19.9391	22.3564	23.2686	20.9924	24.0739	22.8525	22.0221	18.5106	19.91	20.6957	monogalactosyldiacylglycerol synthase	PF06925(Monogalactosyldiacylglycerol (MGDG) synthase)	PTHR21015:SF21(SUBFAMILY NOT NAMED), PTHR21015(GLYCOSYLTRANSFERASE)				GO:0016758(molecular_function: transferase activity, transferring hexosyl groups), GO:0009247(biological_process: glycolipid biosynthetic process)	AT4G31780.2	monogalactosyl diacylglycerol synthase 1
Medtr1g013640	chr1	+	3331910	3335901	3.60475	2.52118	2.21136	2.68273	4.07569	4.84106	2.54589	3.93101	2.45838	3.08384	2.85746	2.39504	hypothetical protein							AT2G24970.1
Medtr1g013630	chr1	+	3339673	3341296	0	0	0	0	0.064674	0.008709	0.097519	0	0	0	0.017279	0	F-box/RNI/FBD-like domain protein	PF07723(Leucine Rich Repeat), PF00646(F-box domain)	PTHR23125()				GO:0005515(molecular_function: protein binding)	AT1G13570.1	F-box/RNI-like superfamily protein
Medtr1g013620	chr1	+	3341399	3342924	0.06075	0.05109	0	0	0	0	0	0	0	0	0	0	ubiquitin-protein ligase, putative							AT1G13570.1	F-box/RNI-like superfamily protein
Medtr1g013600	chr1	+	3353377	3353562	0	0	0	0	0	0	0	0	0	0	0	0	hypothetical protein
Medtr1g013580	chr1	+	3361025	3364350	0.086219	0.262132	0.034552	0.101034	0.137804	0.029362	0.024636	0.174932	0.096087	0.131472	0.271459	0.689592	F-box/FBD-like domain protein	PF00646(F-box domain)					GO:0005515(molecular_function: protein binding)	AT1G13570.1	F-box/RNI-like superfamily protein
Medtr1g013560	chr1	+	3371041	3374758	4.65197	4.83553	4.91318	6.31337	6.70319	5.36422	5.43007	5.06336	6.41823	7.9738	6.50331	8.08329	F-box/RNI/FBD-like domain protein	PF00646(F-box domain), PF07723(Leucine Rich Repeat)					GO:0005515(molecular_function: protein binding)	AT1G13570.1	F-box/RNI-like superfamily protein
Medtr1g013280	chr1	+	3378620	3380447	0.003716	0	0	0	0	0.000945	0.010051	0	0	0	0.004485	0	F-box/FBD/LRR plant protein, putative							AT1G13570.1	F-box/RNI-like superfamily protein
Medtr1g013350	chr1	-	3381303	3383894	4.06137	3.68042	3.57319	4.54316	3.97918	3.63192	6.92209	5.53466	4.85646	5.13564	5.04325	6.32678	transmembrane protein, putative							AT5G10745.1
Medtr1g013340	chr1	-	3388917	3389157	0.070383	0	0	0	0	0	0	0	0	0	0	0	transmembrane protein, putative
Medtr1g014640	chr1	+	3407349	3413810	17.7975	16.8493	16.8265	15.1789	17.0771	26.3036	14.459	15.1367	17.5199	22.0951	21.3954	24.3686	phytochrome-associated protein phosphatase type 2C	PF00481(Protein phosphatase 2C)	PTHR13832(PROTEIN PHOSPHATASE 2C), PTHR13832:SF186()	KOG0698(Serine/threonine protein phosphatase)			GO:0003824(molecular_function: catalytic activity)	AT4G31750.1	HOPW1-1-interacting 2
Medtr1g013450	chr1	-	3419850	3420903	17.0647	15.7904	17.3891	40.5525	40.2141	44.9922	32.0924	37.3319	36.2289	27.7727	34.4059	28.2313	zinc finger constans-like protein	PF00643(B-box zinc finger), PF06203(CCT motif)		KOG1601(GATA-4/5/6 transcription factors)			GO:0008270(molecular_function: zinc ion binding), GO:0005622(cellular_component: intracellular), GO:0005515(molecular_function: protein binding)	AT5G24930.1	CONSTANS-like 4
Medtr1g013440	chr1	+	3421584	3423926	1.15079	1.55524	1.87151	2.66673	2.48126	2.71785	1.82403	3.24617	3.2893	2.67266	4.34185	5.54305	39S ribosomal protein L53/MRP-L53	PF10780(39S ribosomal protein L53/MRP-L53)						AT5G39600.1
Medtr1g014650	chr1	-	3423546	3424604	0.222794	0.091404	0	0.072253	0.236897	0.156333	0.0014	0.210947	0.210153	0.130809	0.279118	0.351363	hypothetical protein
Medtr1g013430	chr1	-	3425527	3426014	0.084333	0.034	0	0.156228	0.246898	0	0.527052	0.184423	0.315039	0.127162	0.115145	0	glutamine dumper, putative							AT4G31730.1	glutamine dumper 1
Medtr1g013410	chr1	-	3429068	3429558	0	0	0	0.345742	0.011123	0.086112	0.152392	0.870499	1.32666	0.250199	0.215914	0.159588	transmembrane protein							AT4G31730.1	glutamine dumper 1
Medtr1g013400	chr1	-	3433635	3439406	27.6033	25.3731	26.0974	22.9263	26.5721	26.6581	24.1248	23.1124	26.3458	35.5121	34.2901	37.4983	phytochrome-associated protein phosphatase type 2C	PF00481(Protein phosphatase 2C)	PTHR13832(PROTEIN PHOSPHATASE 2C), PTHR13832:SF186()	KOG0698(Serine/threonine protein phosphatase)			GO:0003824(molecular_function: catalytic activity)	AT4G31750.1	HOPW1-1-interacting 2
Medtr1g013360	chr1	-	3452043	3457586	0.01113	0.011143	0	0	0	0.001178	0	0	0	0	0	0	histidine kinase cytokinin receptor	PF00512(His Kinase A (phospho-acceptor) domain), PF00072(Response regulator receiver domain), PF02518(Histidine kinase-, DNA gyrase B-, and HSP90-like ATPase)	PTHR24423:SF141(), PTHR24423(TWO-COMPONENT SENSOR HISTIDINE KINASE)	KOG0519(Sensory transduction histidine kinase)			GO:0000156(molecular_function: phosphorelay response regulator activity), GO:0000160(biological_process: phosphorelay signal transduction system), GO:0006355(biological_process: regulation of transcription, DNA-templated), GO:0000155(molecular_function: phosphorelay sensor kinase activity), GO:0007165(biological_process: signal transduction), GO:0016020(cellular_component: membrane), GO:0005524(m…	AT5G10720.1	histidine kinase 5
Medtr1g014670	chr1	-	3478794	3481967	0	0	0	0	0	0	0	0	0	0	0	0	histidine kinase cytokinin receptor	PF00512(His Kinase A (phospho-acceptor) domain)	PTHR24423:SF141(), PTHR24423(TWO-COMPONENT SENSOR HISTIDINE KINASE)				GO:0000155(molecular_function: phosphorelay sensor kinase activity), GO:0007165(biological_process: signal transduction), GO:0016020(cellular_component: membrane)	AT5G10720.1	histidine kinase 5
Medtr1g014680	chr1	+	3486908	3492992	7.16846	6.63454	6.41051	7.24271	7.04312	7.17433	7.14985	6.42328	6.60196	9.09354	7.41282	8.85081	ubiquitin carboxy-terminal hydrolase	PF00443(Ubiquitin carboxyl-terminal hydrolase), PF01753(MYND finger)	PTHR24006(FAMILY NOT NAMED), PTHR24006:SF250()	KOG1865(Ubiquitin carboxyl-terminal hydrolase)			GO:0004843(molecular_function: ubiquitin-specific protease activity), GO:0006511(biological_process: ubiquitin-dependent protein catabolic process)	AT2G24640.1	ubiquitin-specific protease 19
Medtr1g014690	chr1	+	3494604	3500106	12.5563	12.9543	11.5977	19.1499	20.8941	20.921	20.6029	22.2603	20.7101	29.6931	30.8873	38.6599	gamma-tocopherol methyltransferase	PF08241(Methyltransferase domain)	PTHR10108(METHYLTRANSFERASE), PTHR10108:SF217()	KOG1269(SAM-dependent methyltransferases)			GO:0008168(molecular_function: methyltransferase activity), GO:0008152(biological_process: metabolic process)	AT1G64970.1	gamma-tocopherol methyltransferase
Medtr1g014700	chr1	+	3502215	3504443	1.62756	1.57938	2.04762	2.70047	3.912	3.19656	2.50541	2.56294	3.15074	2.00672	2.58683	2.20042	F-box only protein	PF00646(F-box domain)					GO:0005515(molecular_function: protein binding)	AT4G33160.1	F-box family protein
Medtr1g014710	chr1	+	3505741	3509683	18.4386	17.4457	15.5889	15.6177	16.1793	16.1613	14.7881	14.2539	14.054	21.5005	24.2751	28.0025	RING-finger ubiquitin ligase	PF00097(Zinc finger, C3HC4 type (RING finger))	PTHR22763(RING ZINC FINGER PROTEIN)	KOG1493(Anaphase-promoting complex (APC), subunit 11)			GO:0046872(molecular_function: metal ion binding)	AT5G20910.1	RING/U-box superfamily protein
Medtr1g014720	chr1	-	3511878	3516674	9.98105	10.9347	7.71559	12.3499	10.9668	10.5352	12.0077	11.1687	10.0273	13.1014	13.7346	12.546	2OG-Fe(II) oxygenase family oxidoreductase	PF03171(2OG-Fe(II) oxygenase superfamily)	PTHR13069(UNCHARACTERIZED), PTHR13069:SF2()	KOG4176(Uncharacterized conserved protein)			GO:0016491(molecular_function: oxidoreductase activity), GO:0016706(molecular_function: oxidoreductase activity, acting on paired donors, with incorporation or reduction of molecular oxygen, 2-oxoglutarate as one donor, and incorporation of one atom each of oxygen into both donors), GO:0055114(biological_process: oxidation-reduction process)	AT2G17970.1	2-oxoglutarate (2OG) and Fe(II)-dependent oxygenase superfamily protein
Medtr1g014730	chr1	+	3519914	3524426	16.8757	15.3951	16.8873	24.225	21.4348	20.3049	24.4194	26.501	29.4862	28.4952	25.8565	24.6798	DUF1350 family protein	PF07082(Protein of unknown function (DUF1350))						AT3G43540.1	Protein of unknown function (DUF1350)
Medtr1g014750	chr1	+	3529729	3530784	0.140798	0	0	0	0	0	0	0	0	0	0	0	hypothetical protein							AT5G21280.1	hydroxyproline-rich glycoprotein family protein
Medtr1g014790	chr1	+	3555737	3558589	0.007053	0.160745	0	0.238065	0.089953	0.04073	0.240806	0.218116	0.23692	0.094815	0.046134	0	nodulin MtN21/EamA-like transporter family protein	PF00892(EamA-like transporter family)					GO:0016020(cellular_component: membrane)	AT3G28050.1	nodulin MtN21 /EamA-like transporter family protein
MT4Noble_000506	chr1	+	3556236	3556549	0.056713	0.766014	0.111968	1.03395	0.465085	0.284251	0.599806	1.28309	0.8347	0.39364	0.223657	0	Nodulin MtN21/EamA-like transporter family protein
Medtr1g014820	chr1	+	3573655	3574452	0.052093	0	0.124701	0	0	0	0	0	0	0	0	0	ethylene-responsive transcription factor ERF018	PF00847(AP2 domain)					GO:0003700(molecular_function: sequence-specific DNA binding transcription factor activity), GO:0006355(biological_process: regulation of transcription, DNA-templated)	AT1G74930.1	Integrase-type DNA-binding superfamily protein
MT4Noble_000509	chr1	+	3575548	3575745	2.9281	1.66759	3.00208	3.06561	3.32009	2.88777	2.42639	3.07633	4.54307	3.01191	2.11142	4.4501
Medtr1g014880	chr1	-	3594680	3600918	75.3259	72.8453	72.1897	79.9935	84.9119	74.0405	64.6097	68.9333	82.0589	84.9255	78.3213	90.9856	Smr (small MutS-related) domain protein	PF08590(Domain of unknown function (DUF1771))						AT2G26280.1	CTC-interacting domain 7
Medtr1g014930	chr1	-	3624922	3626782	8.60428	8.52835	14.4215	10.8195	9.81738	8.28209	13.9362	9.62077	10.7845	16.1396	11.3846	15.7478	DUF1677 family protein	PF07911(Protein of unknown function (DUF1677))						AT1G72510.1	Protein of unknown function (DUF1677)
Medtr1g014988	chr1	-	3654028	3654445	0	0	0	0	0	0	0	0	0	0	0	0	transmembrane protein, putative
Medtr1g015000	chr1	+	3664002	3664639	0.422868	0.491305	0.772588	1.30829	1.02415	0.852466	1.44828	1.17189	0.802217	1.27829	3.0811	6.89117	Ctr family copper transporter	PF04145(Ctr copper transporter family)	PTHR12483(SOLUTE CARRIER FAMILY 31 COPPER TRANSPORTERS), PTHR12483:SF1()	KOG3386(Copper transporter)			GO:0005375(molecular_function: copper ion transmembrane transporter activity), GO:0035434(biological_process: copper ion transmembrane transport), GO:0016021(cellular_component: integral component of membrane)	AT5G20650.1	copper transporter 5
Medtr1g015010	chr1	-	3665624	3672178	5.89937	4.36641	4.71002	5.28711	5.92342	5.81365	5.08719	4.61821	5.91699	6.16176	6.02552	5.18724	G-protein coupled receptor, putative	PF05462(Slime mold cyclic AMP receptor)	PTHR23112(G PROTEIN-COUPLED RECEPTOR 157-RELATED)			K08467(Signaling molecules and interaction: G protein-coupled receptors [BR:ko04030]: GPR157; G protein-coupled receptor 157)		AT1G48270.1	G-protein-coupled receptor 1
Medtr1g015020	chr1	-	3673267	3676465	0.01224	0.082098	0.092993	0.035833	0	0.039811	0.017643	0.051497	0.065287	0.060116	0.134129	0.252469	kinase 1B	PF07714(Protein tyrosine kinase)	PTHR24420:SF685(), PTHR24420()	KOG1187(Serine/threonine protein kinase)			GO:0004672(molecular_function: protein kinase activity), GO:0006468(biological_process: protein phosphorylation)	AT2G05940.1	Protein kinase superfamily protein
Medtr1g015040	chr1	-	3681008	3682071	0.03907	0.156201	0.149017	0	0	0	0	0	0	0	0	0	transmembrane protein, putative
Medtr1g015050	chr1	+	3683350	3687147	0	0	0	0	0	0	0	0	0	0	0	0	adenine nucleotide alpha hydrolase-like domain kinase	PF00069(Protein kinase domain), PF00582(Universal stress protein family)	PTHR24420:SF203(), PTHR24420()	KOG1187(Serine/threonine protein kinase)			GO:0004672(molecular_function: protein kinase activity), GO:0005524(molecular_function: ATP binding), GO:0006468(biological_process: protein phosphorylation), GO:0006950(biological_process: response to stress)	AT5G26150.1	protein kinase family protein
Medtr1g015073	chr1	+	3700291	3700941	0	0	0	0	0	0	0	0	0	0	0	0	transmembrane protein, putative							AT4G05095.1
Medtr1g015110	chr1	-	3710663	3716339	12.8525	11.03	11.4286	15.8803	15.9005	20.9843	12.1879	14.0648	16.2511	14.4794	14.7234	17.9319	protein phosphatase 2C family protein	PF00481(Protein phosphatase 2C)	PTHR13832(PROTEIN PHOSPHATASE 2C), PTHR13832:SF115()	KOG0698(Serine/threonine protein phosphatase)	3.1.3.16(Protein-serine/threonine phosphatase.)	K14497(Endocrine and metabolic diseases: Insulin resistance [PATH:ko04931]: PP2C; protein phosphatase 2C)	GO:0003824(molecular_function: catalytic activity)	AT1G72770.1	homology to ABI1
Medtr1g015120	chr1	+	3723601	3727194	3.70134	5.32959	4.64591	4.33839	3.96688	3.83779	2.83869	3.26953	4.39037	5.14599	4.68934	4.45995	hypothetical protein							AT5G20610.1
MT4Noble_000522	chr1	+	3730397	3730642	0	0.041031	0.376875	0	0	0	0	0	0	0	0	0.59183
Medtr1g015140	chr1	-	3734089	3734958	42.4621	47.7393	27.0852	15.4049	22.7787	20.7028	15.2036	7.84221	12.3601	15.6896	20.3257	14.8732	WRKY family transcription factor	PF03106(WRKY DNA -binding domain)					GO:0003700(molecular_function: sequence-specific DNA binding transcription factor activity), GO:0043565(molecular_function: sequence-specific DNA binding), GO:0006355(biological_process: regulation of transcription, DNA-templated)	AT5G26170.1	WRKY DNA-binding protein 50
Medtr1g015165	chr1	-	3744476	3745342	1.71299	1.19098	1.34231	0.60323	0.657049	0.619989	0.431946	0.213495	0.159059	0.137326	0.654156	1.55372	cytosolic class II small heat-shock protein	PF00011(Hsp20/alpha crystallin family)	PTHR11527(SMALL HEAT-SHOCK PROTEIN HSP20 FAMILY), PTHR11527:SF14()	KOG3591(Alpha crystallins)				AT5G12020.1	17.6 kDa class II heat shock protein
Medtr1g015185	chr1	-	3746618	3751255	12.729	11.305	11.6675	12.7077	13.3584	13.7121	13.2682	12.7723	14.7855	18.7311	20.3918	18.1476	PHD finger alfin-like protein	PF12165(Domain of unknown function (DUF3594))	PTHR23123(PHD/F-BOX CONTAINING PROTEIN)				GO:0042393(molecular_function: histone binding), GO:0006355(biological_process: regulation of transcription, DNA-templated)	AT5G20510.1	alfin-like 5
Medtr1g015275	chr1	+	3757928	3759340	1.22641	1.07424	0.968466	0.970209	1.15677	1.02875	1.69631	2.37624	1.60898	1.29414	1.39211	0.794509	hypothetical protein							AT3G13980.1
Medtr1g015290	chr1	+	3764474	3765010	639.242	517.825	672.83	662.749	443.874	686.265	745.668	864.297	702.331	485.216	523.071	377.621	ultraviolet-B-repressible protein	PF06596(Photosystem II reaction centre X protein (PsbX))					GO:0015979(biological_process: photosynthesis), GO:0009523(cellular_component: photosystem II), GO:0016020(cellular_component: membrane)	AT2G06520.1	photosystem II subunit X
Medtr1g015300	chr1	-	3765574	3769235	2.4006	3.04298	1.78601	1.58487	1.81303	1.60937	2.76982	2.83127	2.85896	0.406397	0.676434	0.843037	thermospermine synthase ACAULIS protein	PF01564(Spermine/spermidine synthase)	PTHR11558(SPERMIDINE/SPERMINE SYNTHASE), PTHR11558:SF3()	KOG1562(Spermidine synthase)	2.5.1.16(Spermidine synthase.)	K00797(Metabolism of other amino acids: Glutathione metabolism [PATH:ko00480]: speE, SRM; spermidine synthase)	GO:0003824(molecular_function: catalytic activity)	AT5G19530.1	S-adenosyl-L-methionine-dependent methyltransferases superfamily protein
Medtr1g015230	chr1	+	3788448	3789577	0.031816	0.055597	0.017397	0.029816	0.068735	0.053275	0.175071	0.093899	0.077407	0.104932	0.091468	0.051864	hypothetical protein
Medtr1g015350	chr1	-	3808057	3809429	0	0	0.087823	0	0	0	0	0	0	0	0	0	hypothetical protein
Medtr1g015390	chr1	-	3810303	3820269	8.62697	8.9588	9.39762	12.0885	13.1955	9.49927	10.2128	10.4493	11.0174	10.9707	10.6909	10.8062	peroxisome biogenesis factor 10	PF04757(Pex2 / Pex12 amino terminal region)	PTHR23350(PEROXISOME ASSEMBLY PROTEIN 10)	KOG0317(Predicted E3 ubiquitin ligase, integral peroxisomal membrane protein)		K13346(Transport and catabolism: Peroxisome [PATH:ko04146]: PEX10; peroxin-10)		AT2G26350.1	peroxin 10
Medtr1g015410	chr1	+	3840622	3846134	38.8807	51.0769	63.9715	40.5914	53.0144	38.0788	32.0236	27.5103	30.4786	50.2698	48.3278	61.2063	cytokinin oxidase/dehydrogenase-like protein	PF09265(Cytokinin dehydrogenase 1, FAD and cytokinin binding), PF01565(FAD binding domain )	PTHR11748:SF31(), PTHR11748(D-LACTATE DEHYDROGENASE)	KOG1231(Proteins containing the FAD binding domain)	1.5.99.12(Cytokinin dehydrogenase.)	K00279(Metabolism of terpenoids and polyketides: Zeatin biosynthesis [PATH:ko00908]: CKX; cytokinin dehydrogenase)	GO:0008762(molecular_function: UDP-N-acetylmuramate dehydrogenase activity), GO:0016491(molecular_function: oxidoreductase activity), GO:0050660(molecular_function: flavin adenine dinucleotide binding), GO:0055114(biological_process: oxidation-reduction process), GO:0019139(molecular_function: cytokinin dehydrogenase activity), GO:0009690(biological_process: cytokinin metabolic process)	AT5G21482.1	cytokinin oxidase 7
Medtr1g015450	chr1	+	3862292	3870164	45.0708	48.1158	52.1663	39.897	43.7525	41.5428	33.9763	36.8643	38.759	41.3098	37.252	40.5505	F-box-like protein	PF00646(F-box domain)	PTHR23125(), PTHR23125:SF57()	KOG4341(F-box protein containing LRR)			GO:0005515(molecular_function: protein binding)	AT4G33210.1	F-box family protein
Medtr1g015470	chr1	-	3873737	3874387	0.383135	0.125099	0.534751	0.174495	0	0.221471	0.171159	0.394073	0.525925	0.206801	0	0.021795	transmembrane protein, putative							AT5G21910.1
Medtr1g015480	chr1	+	3877991	3883579	0.001	0.001204	0.020283	0.015269	0.019959	0	0.001671	0.015759	0	0	0.002465	0.002191	F-box-like protein	PF00646(F-box domain)	PTHR23125(), PTHR23125:SF57()				GO:0005515(molecular_function: protein binding)	AT4G33210.1	F-box family protein
Medtr1g015490	chr1	-	3884524	3884894	0	0	0	0.102748	0	0	0.141077	0.174643	0.257751	0.140615	0	0.215118	transmembrane protein, putative							AT5G21910.1
Medtr1g015500	chr1	+	3886816	3889784	14.6861	12.7087	10.1248	14.5587	11.8509	10.7892	12.9561	14.2737	10.1942	11.8871	10.0323	8.50172	50S ribosomal protein L33	PF00471(Ribosomal protein L33)	PTHR15238(FAMILY NOT NAMED), PTHR15238:SF1(39S RIBOSOMAL PROTEIN L33, MITOCHONDRIAL)	KOG3505(Mitochondrial/chloroplast ribosomal protein L33-like)			GO:0003735(molecular_function: structural constituent of ribosome), GO:0006412(biological_process: translation), GO:0005622(cellular_component: intracellular), GO:0005840(cellular_component: ribosome)	AT3G06320.1	Ribosomal protein L33 family protein
Medtr1g015520	chr1	-	3908186	3908531	4.19136	5.14249	5.43271	4.12256	6.63427	3.85647	7.0652	7.07429	6.22841	3.71718	1.83221	3.62698	hypothetical protein
Medtr1g015530	chr1	+	3911308	3919054	11.7081	7.61063	13.6224	6.33038	6.31114	8.41852	12.0812	11.4555	10.2119	2.90694	3.09598	2.2125	LRR receptor-like kinase family protein	PF00560(Leucine Rich Repeat), PF00069(Protein kinase domain), PF08263(Leucine rich repeat N-terminal domain)	PTHR24420(), PTHR24420:SF825()	KOG1187(Serine/threonine protein kinase)			GO:0004672(molecular_function: protein kinase activity), GO:0005524(molecular_function: ATP binding), GO:0006468(biological_process: protein phosphorylation), GO:0005515(molecular_function: protein binding)	AT2G26330.1	Leucine-rich receptor-like protein kinase family protein
Medtr1g015540	chr1	-	3922053	3924374	0.017903	0	0	0	0.064077	0	0	0	0	0	0	0	anthranilate phosphoribosyltransferase-like protein	PF00168(C2 domain), PF08372(Plant phosphoribosyltransferase C-terminal)	PTHR10024:SF97(PROTEIN D2023.3, ISOFORM A), PTHR10024(SYNAPTOTAGMIN)				GO:0005515(molecular_function: protein binding)	AT3G57880.1	Calcium-dependent lipid-binding (CaLB domain) plant phosphoribosyltransferase family protein
Medtr1g015620	chr1	+	3948600	3971342	5.08977	5.49634	6.36104	4.8378	5.4058	4.5047	3.74658	4.1138	4.54802	6.37651	5.62223	6.67319	myosin heavy chain	PF02736(Myosin N-terminal SH3-like domain), PF01843(DIL domain), PF00612(IQ calmodulin-binding motif), PF00063(Myosin head (motor domain))	PTHR13140(MYOSIN), PTHR13140:SF36()	KOG0160(Myosin class V heavy chain)			GO:0003774(molecular_function: motor activity), GO:0005524(molecular_function: ATP binding), GO:0016459(cellular_component: myosin complex), GO:0005515(molecular_function: protein binding)	AT4G33200.1	myosin, putative
Medtr1g015650	chr1	-	3975307	3979166	71.5549	80.8624	78.0306	55.7013	80.0534	58.5727	32.9201	34.1135	39.1267	36.3654	48.0351	33.8469	hypothetical protein							AT5G21940.1
Medtr1g015670	chr1	-	3984990	3990414	0	0.163174	0	0	0	0	0	0.129384	0	0	0	0	hypothetical protein
Medtr1g015673	chr1	+	3986316	3987131	0	0	0	0	0	0	0	0	0	0	0	0	hypothetical protein
Medtr1g015677	chr1	+	3987876	3988952	0.039795	0	0	0	0.025874	0	0.017894	0.05474	0	0.018834	0	0	hypothetical protein
Medtr1g015680	chr1	+	3991372	3992919	0	0	0	0	0	0	0	0	0	0	0	0	OTU-like cysteine protease	PF02338(OTU-like cysteine protease)
Medtr1g015700	chr1	-	3997246	4003182	1.80521	2.51294	2.75855	1.15707	1.88128	1.85075	1.17003	1.0677	1.69891	2.35749	2.66818	6.10641	chalcone-flavanone isomerase family protein	PF02431(Chalcone-flavanone isomerase)					GO:0016872(molecular_function: intramolecular lyase activity)	AT2G26310.2	Chalcone-flavanone isomerase family protein
Medtr1g015710	chr1	+	4006830	4007033	0	0	0	0	0	0	0	0	0	0.594976	0	0	hypothetical protein
Medtr1g015720	chr1	+	4010083	4011834	0	0	0	0	0	0	0	0	0	0	0	0.031057	transmembrane protein, putative
Medtr1g015730	chr1	-	4014695	4015885	0.438854	0.310202	0.428346	0.514129	0.683412	0.580312	0.512143	0.814098	1.14678	1.35769	0.795448	0.800191	F-box protein interaction domain protein	PF00646(F-box domain)					GO:0005515(molecular_function: protein binding)	AT3G06240.1	F-box family protein
Medtr1g015740	chr1	-	4016529	4017700	0	0.005744	0	0	0	0	0	0	0	0	0.113862	0	F-box and associated interaction domain protein	PF00646(F-box domain)					GO:0005515(molecular_function: protein binding)	AT3G23880.1	F-box and associated interaction domains-containing protein
Medtr1g015750	chr1	-	4018548	4026561	4.21983	4.50794	5.01115	5.1256	4.29857	4.87972	3.85345	3.89481	3.45934	3.20924	4.04764	4.20231	heterotrimeric GTP-binding protein alpha subunit, putative	PF00503(G-protein alpha subunit)	PTHR10218:SF25(), PTHR10218(GTP-BINDING PROTEIN ALPHA SUBUNIT)	KOG0082(G-protein alpha subunit (small G protein superfamily))			GO:0003924(molecular_function: GTPase activity), GO:0004871(molecular_function: signal transducer activity), GO:0019001(molecular_function: guanyl nucleotide binding), GO:0031683(molecular_function: G-protein beta/gamma-subunit complex binding), GO:0007186(biological_process: G-protein coupled receptor signaling pathway)	AT2G26300.1	G protein alpha subunit 1
Medtr1g015770	chr1	+	4031843	4039454	8.52461	7.85616	7.16817	6.52085	6.06862	6.99113	5.10746	5.31053	4.17247	8.82993	8.83658	12.7935	S-adenosyl-L-methionine-dependent methyltransferase	PF08242(Methyltransferase domain), PF10294(Lysine methyltransferase)	PTHR22809(METHYLTRANSFERASE-RELATED)	KOG2361(Predicted methyltransferase)				AT2G26200.1	S-adenosyl-L-methionine-dependent methyltransferases superfamily protein
Medtr1g015780	chr1	-	4041900	4042803	0.968193	0.586751	0.377419	0.107517	0.249315	0.435457	1.28839	1.42246	0.147826	0.06877	2.05553	0.109553	hypothetical protein
Medtr1g015810	chr1	+	4063382	4064186	1.77228	2.2298	1.90204	1.31927	1.7052	1.20365	1.01283	0.961627	1.24023	0.838809	1.45259	2.05412	DUF3511 domain protein	PF12023(Domain of unknown function (DUF3511))						AT5G11970.1	Protein of unknown function (DUF3511)
Medtr1g015820	chr1	+	4067354	4073384	19.6511	22.0707	21.5841	22.9538	23.4525	23.6486	22.3181	20.7594	22.1575	26.7627	27.7987	26.883	magnesium transporter NIPA protein	PF05653(Magnesium transporter NIPA)		KOG2922(Uncharacterized conserved protein)			GO:0015095(molecular_function: magnesium ion transmembrane transporter activity), GO:0015693(biological_process: magnesium ion transport), GO:0016020(cellular_component: membrane)	AT5G11960.1	Protein of unknown function (DUF803)
Medtr1g015830	chr1	-	4074793	4079142	21.3792	22.4753	22.22	21.5945	18.642	19.7149	12.926	13.9807	14.8057	17.6275	15.1513	16.0873	lysine decarboxylase family protein	PF03641(Possible lysine decarboxylase)						AT5G11950.1	Putative lysine decarboxylase family protein
Medtr1g015840	chr1	+	4082933	4083631	0	0	0	0.054534	0	0	0	0	0	0	0	0	transmembrane protein, putative
Medtr1g015860	chr1	-	4089186	4092561	0.037307	0.093225	0.13803	0.111344	0.090204	0.130291	0.034036	0.084914	0	0.383782	0.256305	0.731136	cytochrome P450 family protein	PF00067(Cytochrome P450)	PTHR24301(FAMILY NOT NAMED), PTHR24301:SF127()	KOG0158(Cytochrome P450 CYP3/CYP5/CYP6/CYP9 subfamilies)			GO:0005506(molecular_function: iron ion binding), GO:0016705(molecular_function: oxidoreductase activity, acting on paired donors, with incorporation or reduction of molecular oxygen), GO:0020037(molecular_function: heme binding), GO:0055114(biological_process: oxidation-reduction process)	AT2G26170.1	cytochrome P450, family 711, subfamily A, polypeptide 1
Medtr1g015890	chr1	+	4108971	4109792	7.70632	5.92701	7.85415	6.56534	6.34771	8.40422	4.92064	8.14569	7.73053	8.54038	6.25164	10.1341	glutaredoxin-like protein, putative	PF00462(Glutaredoxin)	PTHR10168:SF47(GLUTAREDOXIN-1), PTHR10168(GLUTAREDOXIN)	KOG1752(Glutaredoxin and related proteins)			GO:0009055(molecular_function: electron carrier activity), GO:0015035(molecular_function: protein disulfide oxidoreductase activity), GO:0045454(biological_process: cell redox homeostasis)	AT4G33040.1	Thioredoxin superfamily protein
Medtr1g015910	chr1	-	4116016	4120237	1.31721	1.52242	1.80867	2.07333	1.99467	1.99708	1.47326	1.55996	2.96183	3.18828	2.00114	2.00975	fructan exohydrolase	PF00251(Glycosyl hydrolases family 32 N-terminal domain), PF08244(Glycosyl hydrolases family 32 C terminal)		KOG0228(Beta-fructofuranosidase (invertase))				AT1G55120.1	beta-fructofuranosidase 5
Medtr1g015920	chr1	-	4121443	4122193	3.88682	5.10924	3.84687	4.64143	3.87704	3.78708	4.59251	5.07768	7.77405	4.44624	4.87096	5.18389	glycoside hydrolase family 32 amine-terminal domain protein	PF00251(Glycosyl hydrolases family 32 N-terminal domain)						AT3G13790.1	Glycosyl hydrolases family 32 protein
Medtr1g015930	chr1	-	4122613	4124578	34.2778	27.3719	25.5877	52.6637	44.9009	47.0408	53.301	57.4056	50.4338	48.6582	52.4916	42.6453	C2H2 type zinc finger protein	PF01936(NYN domain)						AT5G52010.1	C2H2-like zinc finger protein
Medtr1g015940	chr1	-	4127132	4130009	2.13583	2.71064	1.40342	1.09105	2.12899	1.69875	0.971432	0.745405	1.19979	1.21029	1.45461	1.07122	fructan exohydrolase	PF08244(Glycosyl hydrolases family 32 C terminal), PF00251(Glycosyl hydrolases family 32 N-terminal domain)		KOG0228(Beta-fructofuranosidase (invertase))				AT3G13790.1	Glycosyl hydrolases family 32 protein
Medtr1g015960	chr1	-	4133671	4134004	0	0	0	0	0	0	0	0	0	0	0	0	transmembrane protein, putative
Medtr1g015970	chr1	-	4135963	4139183	18.3678	21.1228	12.6684	10.7086	17.2177	17.913	10.6135	7.2961	9.81543	9.77012	12.8028	9.62476	fructan exohydrolase	PF08244(Glycosyl hydrolases family 32 C terminal), PF00251(Glycosyl hydrolases family 32 N-terminal domain)		KOG0228(Beta-fructofuranosidase (invertase))				AT3G13790.1	Glycosyl hydrolases family 32 protein
Medtr1g015980	chr1	-	4141021	4143821	0.786461	0.929466	0.496347	4.18675	4.5236	2.42679	2.60497	2.80854	3.07178	3.34897	5.46596	5.46151	fructan exohydrolase	PF08244(Glycosyl hydrolases family 32 C terminal), PF00251(Glycosyl hydrolases family 32 N-terminal domain)		KOG0228(Beta-fructofuranosidase (invertase))				AT3G13790.1	Glycosyl hydrolases family 32 protein
MT4Noble_000581	chr1	+	4148245	4148517	0	0.028363	0	0	0	0	0	0	0	0	0	0
Medtr1g015990	chr1	+	4152514	4155700	0.326434	0.184835	0.030936	0.176662	0.337009	0.208849	0.222863	0.139413	0.142056	0.415988	0.49721	0.262311	ethylene insensitive protein
Medtr1g016000	chr1	-	4157191	4157355	0.25194	0	0	0	0	0	0	0	0	0	0	0	hypothetical protein							AT1G48720.1
Medtr1g016010	chr1	+	4158857	4161721	42.6647	35.001	35.9752	38.8821	34.7562	38.5141	33.2462	39.7823	42.7377	50.6695	46.2905	45.1513	C2H2-type zinc finger protein	PF12171(Zinc-finger double-stranded RNA-binding)	PTHR10593(SERINE/THREONINE-PROTEIN KINASE RIO)					AT1G55110.1	indeterminate(ID)-domain 7
Medtr1g016050	chr1	+	4180320	4184942	2.87355	3.13711	2.99012	4.80481	4.47173	4.90096	3.62293	3.66323	4.1069	3.73964	3.33026	3.4786	BAAT/acyl-CoA thioester hydrolase carboxy-terminal protein	PF07866(Protein of unknown function (DUF1653)), PF08840(BAAT / Acyl-CoA thioester hydrolase C terminal), PF12146(Serine aminopeptidase, S33)	PTHR10992(ALPHA/BETA HYDROLASE FOLD-CONTAINING PROTEIN), PTHR10992:SF234()	KOG4667(Predicted esterase)				AT5G11910.1	alpha/beta-Hydrolases superfamily protein
Medtr1g016060	chr1	+	4186114	4190494	0.023524	0	0.046897	0.019604	0.075322	0.013817	0.011989	0	0.019912	0.142408	0	0.072711	fatty acid/sphingolipid desaturase	PF00173(Cytochrome b5-like Heme/Steroid binding domain), PF00487(Fatty acid desaturase)	PTHR19353(FATTY ACID DESATURASE 2), PTHR19353:SF7()	KOG4232(Delta 6-fatty acid desaturase/delta-8 sphingolipid desaturase)			GO:0020037(molecular_function: heme binding), GO:0006629(biological_process: lipid metabolic process)	AT3G61580.1	Fatty acid/sphingolipid desaturase
Medtr1g016070	chr1	+	4195061	4196827	16.4715	7.84072	11.7586	5.23549	5.24365	6.80977	13.1328	10.935	5.51451	2.76867	3.38619	1.00597	fatty acid/sphingolipid desaturase	PF00173(Cytochrome b5-like Heme/Steroid binding domain), PF00487(Fatty acid desaturase)	PTHR19353(FATTY ACID DESATURASE 2)	KOG4232(Delta 6-fatty acid desaturase/delta-8 sphingolipid desaturase)			GO:0020037(molecular_function: heme binding), GO:0006629(biological_process: lipid metabolic process)	AT3G61580.1	Fatty acid/sphingolipid desaturase
Medtr1g016080	chr1	-	4199649	4203676	1.80323	1.09578	1.13221	2.62813	1.6893	2.07888	2.31	2.84097	2.47356	2.3438	2.8781	3.97676	alkaline phytoceramidase (APHC)	PF05875(Ceramidase)					GO:0016811(molecular_function: hydrolase activity, acting on carbon-nitrogen (but not peptide) bonds, in linear amides), GO:0006672(biological_process: ceramide metabolic process), GO:0016021(cellular_component: integral component of membrane)	AT5G11870.2	Alkaline phytoceramidase (aPHC)
Medtr1g016100	chr1	-	4210484	4211956	2.58056	2.64961	1.41498	2.91275	3.24444	3.00262	5.53275	4.28447	3.57336	6.08117	4.22023	7.68352	plant/MHM17-10 protein, putative	PF05553(Cotton fibre expressed protein)						AT2G26110.1	Protein of unknown function (DUF761)
Medtr1g016110	chr1	+	4214827	4219541	13.8067	21.9022	15.2395	28.4206	22.1663	27.4226	26.4189	23.3735	28.035	30.2212	44.2581	38.471	cytosolic Fe-S cluster assembly factor NUBP1-like protein	PF10609(NUBPL iron-transfer P-loop NTPase), PF02374(Anion-transporting ATPase)	PTHR23264:SF8(), PTHR23264(NUCLEOTIDE-BINDING PROTEIN NBP35 YEAST -RELATED)	KOG3022(Predicted ATPase, nucleotide-binding)				AT5G50960.1	nucleotide binding protein 35
Medtr1g016120	chr1	+	4222777	4228819	3.01996	3.79362	2.51731	7.57579	7.10489	7.87834	5.85306	8.96173	6.67456	17.6148	15.6183	23.64	ZIP zinc/iron transport family protein	PF02535(ZIP Zinc transporter)	PTHR11040(ZINC/IRON TRANSPORTER), PTHR11040:SF1()	KOG1558(Fe2+/Zn2+ regulated transporter)			GO:0046873(molecular_function: metal ion transmembrane transporter activity), GO:0030001(biological_process: metal ion transport), GO:0055085(biological_process: transmembrane transport), GO:0016020(cellular_component: membrane)	AT1G10970.1	zinc transporter 4 precursor
Medtr1g016150	chr1	+	4235391	4236331	0	0	0	0	0	0.001966	0	0	0	0	0	0	DUF295 family protein	PF03478(Protein of unknown function (DUF295))
Medtr1g016160	chr1	+	4237601	4237819	0	0	0	0	0	0	0	0	0	0	0.216382	0	hypothetical protein
Medtr1g016170	chr1	-	4238422	4240718	2.92928	1.88205	1.31667	16.768	9.76002	16.6654	12.057	14.2518	12.166	13.909	15.0437	10.2526	GATA zinc finger protein	PF00320(GATA zinc finger)	PTHR10071(TRANSCRIPTION FACTOR GATA GATA BINDING FACTOR)				GO:0003700(molecular_function: sequence-specific DNA binding transcription factor activity), GO:0008270(molecular_function: zinc ion binding), GO:0043565(molecular_function: sequence-specific DNA binding), GO:0006355(biological_process: regulation of transcription, DNA-templated)	AT5G56860.1	GATA type zinc finger transcription factor family protein
Medtr1g016200	chr1	-	4252785	4253229	0	0	0	0	0	0	0	0	0	0	0	0	GATA type zinc finger transcription factor family protein	PF00320(GATA zinc finger)					GO:0003700(molecular_function: sequence-specific DNA binding transcription factor activity), GO:0008270(molecular_function: zinc ion binding), GO:0043565(molecular_function: sequence-specific DNA binding), GO:0006355(biological_process: regulation of transcription, DNA-templated)	AT2G18380.1	GATA transcription factor 20
Medtr1g016210	chr1	+	4255053	4259559	0.102511	0.031538	0.088066	0.153067	0.283473	0.082172	0.148583	0.205175	0.308867	0.34297	0.316699	0.226214	disease resistance protein (CC-NBS-LRR class) family protein	PF00931(NB-ARC domain)	PTHR23155(LEUCINE-RICH REPEAT-CONTAINING PROTEIN)	KOG4658(Apoptotic ATPase)			GO:0043531(molecular_function: ADP binding)	AT3G07040.1	NB-ARC domain-containing disease resistance protein
Medtr1g016217	chr1	+	4261883	4262650	0.109549	0.027005	0	0.102179	0.093491	0.076659	0.108895	0.206726	0.297587	0.259064	0.002744	0.086703	NBS-LRR resistance protein, putative		PTHR23155(LEUCINE-RICH REPEAT-CONTAINING PROTEIN), PTHR23155:SF121()					AT3G07040.1	NB-ARC domain-containing disease resistance protein
Medtr1g016230	chr1	+	4270888	4277979	648.585	617.176	671.033	608.368	542.651	774.953	536.12	612.919	649.134	580.093	565.691	514.632	glycine dehydrogenase [decarboxylating] protein	PF02347(Glycine cleavage system P-protein)	PTHR11773(GLYCINE DEHYDROGENASE)	KOG2040(Glycine dehydrogenase (decarboxylating))	1.4.4.2(Glycine dehydrogenase (aminomethyl-transferring).)	K00281(Amino acid metabolism: Glycine, serine and threonine metabolism [PATH:ko00260]: GLDC, gcvP; glycine dehydrogenase)	GO:0004375(molecular_function: glycine dehydrogenase (decarboxylating) activity), GO:0006546(biological_process: glycine catabolic process), GO:0055114(biological_process: oxidation-reduction process)	AT4G33010.1	glycine decarboxylase P-protein 1
Medtr1g016235	chr1	-	4278398	4279006	65.7063	57.9856	61.1993	93.1059	55.5701	85.1377	42.6178	52.2392	60.4074	68.4018	67.1536	49.4191	hypothetical protein
Medtr1g016255	chr1	-	4296100	4296333	14.5041	19.7081	16.628	18.2945	16.2848	12.1773	17.8082	14.6274	15.428	16.3433	14.2914	14.53	transmembrane protein, putative
Medtr1g016270	chr1	+	4297451	4298281	27.0868	27.4668	24.8446	26.0895	24.3889	21.8436	28.1863	23.2215	22.6405	26.4767	25.9461	24.4017	hypothetical protein							AT5G60030.1
Medtr1g016280	chr1	+	4298714	4299183	0.11731	0.19745	0.067744	1.663	0.268002	0.653699	0.014668	0.051253	0.109481	0.038246	0.178789	0.158176	glycine dehydrogenase [decarboxylating] protein		PTHR11773(GLYCINE DEHYDROGENASE)					AT2G26080.1	glycine decarboxylase P-protein 2
Medtr1g016290	chr1	+	4303228	4308457	0.115549	0.249155	0.343442	0.048878	0.360623	0.189517	0.10957	0.114319	0.207128	0.161913	0.085581	0.146271	CHUP1		PTHR23213:SF81(), PTHR23213(FORMIN-RELATED)					AT3G25690.1	Hydroxyproline-rich glycoprotein family protein
Medtr1g016300	chr1	+	4311042	4320959	9.21315	8.82123	8.80707	7.56032	8.87687	7.80999	5.57763	5.85687	6.67827	9.62748	8.58706	10.1779	MAP kinase kinase kinase-like protein	PF07714(Protein tyrosine kinase)	PTHR23257:SF80(), PTHR23257(SERINE-THREONINE PROTEIN KINASE)				GO:0004672(molecular_function: protein kinase activity), GO:0006468(biological_process: protein phosphorylation)	AT5G11850.1	Protein kinase superfamily protein
Medtr1g016310	chr1	-	4321580	4323851	1.04485	0.826338	1.51289	1.25994	0.989949	1.13039	1.20011	1.74169	1.47918	1.84683	1.29832	1.25849	F-box/RNI/FBD-like domain protein	PF00646(F-box domain)					GO:0005515(molecular_function: protein binding)	AT1G13570.1	F-box/RNI-like superfamily protein
MT4Noble_000610	chr1	-	4324990	4325970	0	0.013827	0	0.002118	0	0.007047	0.19466	0.06121	0	0	0.083506	0
Medtr1g016330	chr1	-	4325713	4326600	0.073029	0.13998	0.257556	0.150246	0	0.093958	0.298925	0.21367	0	0.035533	0	0.026872	hypothetical protein
Medtr1g016335	chr1	+	4328496	4329810	0.012278	0.07701	0.06718	0.320075	0.046788	0	0.132295	0.110268	0	0	0.030822	0.029933	hypothetical protein
Medtr1g016340	chr1	-	4333106	4335726	1.53576	1.58205	1.11846	2.06047	2.04447	2.0735	2.15062	1.52265	2.76249	2.71637	1.97586	2.57093	ubiquitin-protein ligase, putative	PF00646(F-box domain), PF07723(Leucine Rich Repeat)					GO:0005515(molecular_function: protein binding)	AT1G13570.1	F-box/RNI-like superfamily protein
Medtr1g016360	chr1	+	4337804	4341109	43.1131	33.4996	40.9583	37.2335	56.9951	58.4239	47.1353	52.7604	45.5091	62.6888	59.6114	38.7183	DUF1230 family protein	PF06799(Protein of unknown function (DUF1230))						AT5G11840.1	Protein of unknown function (DUF1230)
Medtr1g016370	chr1	+	4343130	4344181	0	0.038812	0	0.07081	0	0	0	0	0.095194	0.047107	0.057989	0.050249	Myb/SANT-like DNA-binding domain protein							AT5G05800.1
Medtr1g016390	chr1	+	4347792	4351565	21.4521	20.9762	22.8044	15.0173	13.4524	11.7907	13.0838	11.8648	13.4945	22.0129	20.8567	22.3102	protein reversion-TO-ethylene SENSITIVITY protein	PF05608(Protein of unknown function (DUF778))	PTHR20921(UNCHARACTERIZED)	KOG3150(Uncharacterized conserved protein)				AT2G26070.1	Protein of unknown function (DUF778)
Medtr1g016395	chr1	-	4352060	4352607	0	0	0	0	0	0	0	0	0	0	0	0	hypothetical protein
MT4Noble_000619	chr1	+	4352683	4352961	0	0	0	0	0	0	0	0	0	0	0	0
Medtr1g016400	chr1	+	4355120	4356277	0	0	0	0	0	0.018256	0	0	0	0	0	0	F-box protein interaction domain protein							AT5G36200.1	F-box and associated interaction domains-containing protein
Medtr1g016410	chr1	-	4357284	4359856	18.3367	16.9331	15.3602	19.6178	15.2746	17.2421	14.1865	14.7026	16.3502	18.4204	16.0612	17.4674	Myo28B1, putative							AT5G11810.1
Medtr1g016430	chr1	-	4363297	4368624	18.887	15.7864	15.4984	15.6712	16.835	21.5769	16.5231	16.6491	17.109	12.0185	13.6663	15.1252	calcineurin B-like protein 4-1		PTHR23056(CALCINEURIN B), PTHR23056:SF15()	KOG0034(Ca2+/calmodulin-dependent protein phosphatase (calcineurin subunit B), EF-Hand superfamily protein)				AT4G33000.2	calcineurin B-like protein 10
Medtr1g016440	chr1	+	4371842	4377658	25.8772	24.4156	24.1768	25.299	25.8532	28.9123	21.3672	26.6778	30.2206	29.565	26.4222	30.9367	histone deacetylase superfamily protein	PF00850(Histone deacetylase domain)	PTHR10625(HISTONE DEACETYLASE), PTHR10625:SF9()	KOG1344(Predicted histone deacetylase)				AT5G26040.2	histone deacetylase 2
Medtr1g016450	chr1	+	4378894	4387367	11.8622	11.5056	9.07146	8.29319	10.3329	10	7.18395	7.25029	8.65377	10.3207	8.78496	9.05789	potassium efflux antiporter	PF00999(Sodium/hydrogen exchanger family)	PTHR16254(POTASSIUM/PROTON ANTIPORTER-RELATED)				GO:0015299(molecular_function: solute:proton antiporter activity), GO:0006812(biological_process: cation transport), GO:0055085(biological_process: transmembrane transport), GO:0016021(cellular_component: integral component of membrane)	AT5G11800.1	K+ efflux antiporter 6
Medtr1g016480	chr1	+	4399288	4400145	0.932663	2.01922	1.64131	3.09592	2.51495	3.35307	1.51427	2.28891	2.02638	3.20902	2.41289	3.38939	abscisic acid receptor	PF10604(Polyketide cyclase / dehydrase and lipid transport)				K14496(Signal transduction: Plant hormone signal transduction [PATH:ko04075]: PYL; abscisic acid receptor PYR/PYL family)		AT2G26040.1	PYR1-like 2
Medtr1g016490	chr1	+	4410107	4412872	0	0.02405	0.029046	0.030152	0	0.025273	0.04465	0.027637	0	0.037595	0	0.003084	BEL1-like homeodomain protein	PF07526(Associated with HOX), PF00046(Homeobox domain)	PTHR11850:SF14(), PTHR11850(HOMEOBOX PROTEIN TRANSCRIPTION FACTORS)	KOG0773(Transcription factor MEIS1 and related HOX domain proteins)			GO:0003700(molecular_function: sequence-specific DNA binding transcription factor activity), GO:0043565(molecular_function: sequence-specific DNA binding), GO:0006355(biological_process: regulation of transcription, DNA-templated)	AT4G32980.1	homeobox gene 1
Medtr1g016510	chr1	-	4416255	4421553	1.3704	1.0947	1.30688	1.2069	1.43204	2.00801	1.27476	1.49075	1.44605	1.00651	0.688037	0.207587	pollen-specific SF21-like protein	PF03096(Ndr family)	PTHR11034(N-MYC DOWNSTREAM REGULATED), PTHR11034:SF3()	KOG2931(Differentiation-related gene 1 protein (NDR1 protein), related proteins)				AT5G11790.1	N-MYC downregulated-like 2
Medtr1g016540	chr1	-	4428437	4428994	0	0	0	0.167371	0	0.004294	0	0	0.171923	0	0	0	F-box protein	PF03478(Protein of unknown function (DUF295))						AT2G17030.1	F-box family protein with a domain of unknown function (DUF295)
MT4Noble_000630	chr1	-	4429585	4434168	0	0	0	0	0	0	0	0	0	0	0	0
Medtr1g016740	chr1	-	4442569	4446995	0.365301	0.393392	0.398188	0.687182	0.561816	0.482161	0.453444	0.585052	0.576985	0.379411	0.259586	0.413846	hypothetical protein							AT5G11780.1
Medtr1g016750	chr1	+	4449872	4454101	45.7052	46.5588	45.648	42.2319	46.7887	43.2331	43.3359	38.8666	44.7006	57.664	56.4936	64.0265	26S proteasome regulatory particle non-ATPase subunit 12	PF03399(SAC3/GANP/Nin1/mts3/eIF-3 p25 family)	PTHR12387(26S PROTEASOME NON-ATPASE REGULATORY SUBUNIT 8)	KOG3151(26S proteasome regulatory complex, subunit RPN12/PSMD8)		K03031(Infectious diseases: Epstein-Barr virus infection [PATH:ko05169]: PSMD8, RPN12; 26S proteasome regulatory subunit N12)		AT1G64520.1	regulatory particle non-ATPase 12A
Medtr1g016760	chr1	+	4457792	4464676	25.2485	26.417	30.0341	24.4369	28.715	23.5095	22.6612	22.8189	25.5088	31.4524	27.7112	32.8592	RNA-binding KH domain protein	PF00013(KH domain)	PTHR10288(KH DOMAIN CONTAINING RNA BINDING PROTEIN), PTHR10288:SF53()	KOG1676(K-homology type RNA binding proteins)		K13210(Translation: Messenger RNA Biogenesis [BR:ko03019]: FUBP; far upstream element-binding protein)	GO:0003723(molecular_function: RNA binding)	AT2G25970.1	KH domain-containing protein
Medtr1g016620	chr1	+	4473372	4477359	0	0.002004	0.034452	0.048985	0.004317	0.106894	0.049604	0	0.092838	0	0.034022	0	protein phosphatase 2C-like protein	PF00481(Protein phosphatase 2C)	PTHR13832(PROTEIN PHOSPHATASE 2C), PTHR13832:SF94()	KOG0698(Serine/threonine protein phosphatase)			GO:0003824(molecular_function: catalytic activity)	AT1G79630.1	Protein phosphatase 2C family protein
Medtr1g016630	chr1	-	4478041	4482442	7.71857	7.43193	8.23562	9.29347	8.32655	8.48624	7.94684	10.3382	11.6554	14.2171	13.2446	11.4462	PHAX RNA-binding domain protein	PF10258(PHAX RNA-binding domain)	PTHR13135(CYTOSOLIC RESINIFERATOXIN BINDING PROTEIN RBP-26)					AT3G20430.1
Medtr1g016780	chr1	+	4491952	4497253	374.363	426.114	341.913	495.367	541.368	497.163	308.836	373.341	517.887	1451.61	1339.67	1700	vacuolar processing enzyme	PF01650(Peptidase C13 family)	PTHR12000:SF2(), PTHR12000(HEMOGLOBINASE FAMILY MEMBER)	KOG1348(Asparaginyl peptidases)			GO:0004197(molecular_function: cysteine-type endopeptidase activity), GO:0006508(biological_process: proteolysis)	AT4G32940.1	gamma vacuolar processing enzyme
Medtr1g016790	chr1	-	4500860	4501291	0.139267	0.444831	0.110568	0.397239	0.494837	0.493277	0.182957	0.595897	0.385124	0.24329	0.406769	0.295587	hypothetical protein
Medtr1g016800	chr1	+	4502153	4508539	52.3054	54.4166	54.7004	53.7754	59.7708	55.5231	46.51	51.3238	58.3258	59.3964	53.8794	49.3982	DUF1639 family protein	PF07797(Protein of unknown function (DUF1639))						AT1G55340.1	Protein of unknown function (DUF1639)
Medtr1g016820	chr1	+	4516301	4517477	0	0	0.020996	0	0	0	0	0.04225	0	0.057474	0	0	OTU-like cysteine protease	PF02338(OTU-like cysteine protease)
Medtr1g016830	chr1	+	4517762	4518777	0	0.046089	0.101859	0	0	0	0	0	0	0.021132	0.124441	0	hypothetical protein
Medtr1g016840	chr1	-	4519752	4520015	0.215789	0.660372	0.119206	0.502966	0.562883	0.36849	0.185422	0.045102	0	0.375791	0.496548	0.252761	hypothetical protein
Medtr1g016850	chr1	-	4527427	4528072	492.755	521.101	432.605	360.654	393.506	526.726	491.776	421.96	329.405	758.083	631.36	687.774	transmembrane protein, putative
MT4Noble_000646	chr1	+	4534956	4535240	0	0.004852	0.005819	0	0.018002	0	0	0	0	0	0	0	Transmembrane protein, putative
Medtr1g016880	chr1	-	4538086	4543527	7.89134	9.61932	9.2635	7.3918	7.47559	9.20572	8.83598	9.76042	8.79548	9.88187	12.2443	13.5478	core-2/I-branching enzyme	PF02485(Core-2/I-Branching enzyme)					GO:0008375(molecular_function: acetylglucosaminyltransferase activity), GO:0016020(cellular_component: membrane)	AT5G11730.1	Core-2/I-branching beta-1,6-N-acetylglucosaminyltransferase family protein
Medtr1g016890	chr1	+	4543759	4543982	3.04487	2.23965	2.17853	3.9463	3.3523	3.44486	3.56465	4.11397	2.94747	4.5073	4.59868	5.64135	hypothetical protein
Medtr1g016900	chr1	-	4546641	4550572	36.1235	35.7707	35.296	41.4595	40.6907	43.9023	37.2244	36.5755	42.3481	42.2397	43.7971	37.6613	UPF0587 C1orf123-like protein	PF05907(Eukaryotic protein of unknown function (DUF866))	PTHR12857(UNCHARACTERIZED)	KOG1296(Uncharacterized conserved protein)				AT4G32930.1
Medtr1g016910	chr1	+	4554263	4556861	0	0	0	0	0	0	0	0	0	0.001332	0	0	carboxyl-terminal peptidase	PF03080(Domain of unknown function (DUF239))						AT5G25950.1	Protein of Unknown Function (DUF239)
Medtr1g016920	chr1	-	4556987	4561290	8.69411	8.79096	8.08329	8.44199	10.039	9.52208	9.17405	7.73405	9.26911	10.0957	8.48115	8.58071	EARLY flowering protein, putative							AT2G25930.1	hydroxyproline-rich glycoprotein family protein
Medtr1g016930	chr1	-	4565937	4566389	0	0.16356	0	0	0	0	0	0	0	0	0	0	hypothetical protein
Medtr1g016950	chr1	+	4569308	4569511	0	0	0	0	0	0	0	0	0	0	0	0	hypothetical protein							AT5G61412.1
Medtr1g016960	chr1	+	4570228	4571240	0.053171	0.020365	0.153424	0.049414	0.236708	0.102698	0.073432	0.05694	0.092363	0	0.064128	0.062492	hypothetical protein
Medtr1g016970	chr1	+	4575701	4582988	41.6334	36.8879	36.7847	45.4444	44.1847	46.6157	38.5682	38.8057	40.8632	43.4968	51.3532	53.2104	3'-5' exonuclease	PF00013(KH domain), PF01612(3'-5' exonuclease)	PTHR12124(POLYMYOSITIS/SCLERODERMA AUTOANTIGEN-RELATED)				GO:0003723(molecular_function: RNA binding), GO:0003676(molecular_function: nucleic acid binding), GO:0008408(molecular_function: 3'-5' exonuclease activity), GO:0006139(biological_process: nucleobase-containing compound metabolic process)	AT2G25910.2	3\'-5\' exonuclease domain-containing protein / K homology domain-containing protein / KH domain-containing protein
Medtr1g016980	chr1	-	4585063	4591540	38.7467	38.5764	39.3	34.6968	35.6417	33.7844	35.2112	34.119	35.4564	36.0477	35.4042	34.8442	clathrin interactor EPSIN-like protein	PF01417(ENTH domain)	PTHR12276:SF7(CLATHRIN INTERACTOR EPSIN 1), PTHR12276(EPSIN/ENT-RELATED)	KOG2056(Equilibrative nucleoside transporter protein)				AT5G11710.1	ENTH/VHS family protein
Medtr1g017000	chr1	-	4609270	4612231	0	0.114148	0	0.139274	0.138794	0.078619	0.034841	0	0.04245	0.056513	0.050495	0.238385	myb transcription factor	PF00249(Myb-like DNA-binding domain)	PTHR10641(MYB-LIKE DNA-BINDING PROTEIN MYB)	KOG0048(Transcription factor, Myb superfamily)			GO:0003682(molecular_function: chromatin binding)	AT5G57620.1	myb domain protein 36
Medtr1g017020	chr1	+	4618914	4624370	2.05713	1.58846	2.51124	1.65922	1.81194	2.21037	1.29053	1.82	2.29809	2.83885	1.67229	2.25702	endo-1,4-beta-xylanase A-like protein	PF02018(Carbohydrate binding domain), PF00331(Glycosyl hydrolase family 10)					GO:0004553(molecular_function: hydrolase activity, hydrolyzing O-glycosyl compounds), GO:0005975(biological_process: carbohydrate metabolic process), GO:0016798(molecular_function: hydrolase activity, acting on glycosyl bonds)	AT1G58370.1	glycosyl hydrolase family 10 protein / carbohydrate-binding domain-containing protein
Medtr1g017080	chr1	+	4656188	4662387	0	0.018715	0	0	0	0	0	0	0	0	0	0	homeobox knotted-like protein	PF03790(KNOX1 domain ), PF00046(Homeobox domain), PF03791(KNOX2 domain ), PF03789(ELK domain )	PTHR11850(HOMEOBOX PROTEIN TRANSCRIPTION FACTORS), PTHR11850:SF50(PRE-B-CELL LEUKEMIA TRANSCRIPTION FACTOR 2)	KOG0773(Transcription factor MEIS1 and related HOX domain proteins)			GO:0003700(molecular_function: sequence-specific DNA binding transcription factor activity), GO:0043565(molecular_function: sequence-specific DNA binding), GO:0006355(biological_process: regulation of transcription, DNA-templated), GO:0003677(molecular_function: DNA binding), GO:0005634(cellular_component: nucleus)	AT4G08150.1	KNOTTED-like from Arabidopsis thaliana
Medtr1g017090	chr1	-	4663975	4666392	0.125806	0.16227	0.106378	0.188578	0.120452	0.167355	0.325982	0.113299	0.424631	0.513117	0.167306	0.196577	homeobox associated leucine zipper protein	PF00046(Homeobox domain), PF02183(Homeobox associated leucine zipper)	PTHR24326(FAMILY NOT NAMED), PTHR24326:SF218(SUBFAMILY NOT NAMED)	KOG0483(Transcription factor HEX, contains HOX and HALZ domains)			GO:0003700(molecular_function: sequence-specific DNA binding transcription factor activity), GO:0043565(molecular_function: sequence-specific DNA binding), GO:0006355(biological_process: regulation of transcription, DNA-templated), GO:0003677(molecular_function: DNA binding), GO:0005634(cellular_component: nucleus)	AT5G06710.1	homeobox from Arabidopsis thaliana
Medtr1g017120	chr1	-	4674635	4676165	0	0	0	0	0	0.013808	0	0	0	0	0	0	F-box protein interaction domain protein							AT5G36200.1	F-box and associated interaction domains-containing protein
Medtr1g017140	chr1	+	4685126	4687287	0.14637	0.049012	0	0	0	0.049123	0	0.027407	0	0	0.033197	0	myb transcription factor	PF00249(Myb-like DNA-binding domain)	PTHR10641(MYB-LIKE DNA-BINDING PROTEIN MYB)	KOG0048(Transcription factor, Myb superfamily)		K09422(Transcription: Transcription factors [BR:ko03000]: MYBP; transcription factor MYB, plant)	GO:0003682(molecular_function: chromatin binding)	AT3G49690.1	myb domain protein 84
Medtr1g017160	chr1	+	4699269	4701806	16.6511	13.6723	13.5367	25.5106	21.4102	22.2289	30.781	29.0189	23.7645	26.5517	27.0174	23.9628	transmembrane protein, putative							AT1G49510.1	embryo defective 1273
Medtr1g017170	chr1	-	4703138	4712716	3.31414	3.62079	4.64613	1.42876	2.00176	1.85365	1.46202	1.94443	1.53384	1.92952	2.29089	2.66077	ERD (early-responsive to dehydration stress) family protein	PF02714(Calcium-dependent channel, 7TM region, putative phosphate)	PTHR13018:SF5(PHOSPHATE METABOLISM PROTEIN 7), PTHR13018(PROBABLE MEMBRANE PROTEIN DUF221-RELATED)	KOG1134(Uncharacterized conserved protein)			GO:0016020(cellular_component: membrane)	AT1G58520.1	lipases;hydrolases, acting on ester bonds
Medtr1g017220	chr1	-	4748030	4752914	11.1157	10.0281	12.2991	10.98	8.22129	8.85266	12.4633	12.5915	8.61607	9.32297	9.42079	6.88017	transmembrane protein, putative							AT3G49720.1
Medtr1g017250	chr1	-	4756017	4756379	0	0	0	0	0	0	0	0	0	0	0	0	hypothetical protein
Medtr1g017260	chr1	+	4756902	4760907	13.6369	12.6254	11.6628	13.6505	10.1194	10.8542	10.8166	10.5946	10.0331	15.0855	15.9435	14.8113	heat shock protein-binding protein	PF00226(DnaJ domain)	PTHR25040(), PTHR25040:SF165()					AT4G07990.2	Chaperone DnaJ-domain superfamily protein
Medtr1g017270	chr1	-	4765355	4770122	19.3123	21.4457	25.4048	11.6923	13.5256	10.616	11.7713	8.68527	9.9729	22.6481	17.8816	24.4861	squalene monooxygenase	PF01946(Thi4 family), PF08491(Squalene epoxidase)	PTHR10835(SQUALENE MONOOXYGENASE)	KOG1298(Squalene monooxygenase)			GO:0004506(molecular_function: squalene monooxygenase activity), GO:0050660(molecular_function: flavin adenine dinucleotide binding), GO:0055114(biological_process: oxidation-reduction process), GO:0016021(cellular_component: integral component of membrane)	AT1G58440.1	FAD/NAD(P)-binding oxidoreductase family protein
Medtr1g017290	chr1	+	4777014	4779568	1.91013	1.69503	1.79851	2.93896	2.74298	2.7558	2.58773	2.33998	2.68644	3.02393	2.70261	2.16417	DNA-binding protein		PTHR21521(UNCHARACTERIZED)					AT3G12210.2	DNA binding
Medtr1g017300	chr1	-	4783325	4783888	12.9132	11.1277	12.8855	19.1749	16.0197	16.5101	13.0918	17.1473	14.2246	15.6459	12.858	17.545	hypothetical protein
Medtr1g017320	chr1	+	4791419	4791976	0	0	0	0.021405	0	0	0.067159	0.083138	0	0	0	0	transmembrane protein, putative
Medtr1g017350	chr1	-	4800948	4807563	2.3262	2.05859	2.71141	1.38564	1.77332	2.07499	1.63897	1.90022	1.43971	1.17753	0.956624	0.804829	transcription factor	PF00010(Helix-loop-helix DNA-binding domain)	PTHR12565(STEROL REGULATORY ELEMENT-BINDING PROTEIN), PTHR12565:SF7()				GO:0046983(molecular_function: protein dimerization activity)	AT1G10120.1	basic helix-loop-helix (bHLH) DNA-binding superfamily protein
Medtr1g017380	chr1	+	4821544	4827364	167.95	160.025	159.572	348.05	293.843	286.886	418.186	425.954	370.812	235.6	246.946	227.503	TCP-1/cpn60 chaperonin family protein	PF00118(TCP-1/cpn60 chaperonin family)	PTHR11353:SF8(CHAPERONIN 60 SUBUNIT BETA 1, CHLOROPLASTIC-RELATED), PTHR11353(CHAPERONIN)	KOG0356(Mitochondrial chaperonin, Cpn60/Hsp60p)			GO:0005524(molecular_function: ATP binding), GO:0044267(biological_process: cellular protein metabolic process)	AT1G55490.1	chaperonin 60 beta
Medtr1g017390	chr1	+	4833343	4839399	48.2357	47.9514	47.4031	115.785	92.4588	91.6262	176.618	186.283	132.832	56.5642	61.8115	53.7578	TCP-1/cpn60 chaperonin family protein	PF00118(TCP-1/cpn60 chaperonin family)	PTHR11353(CHAPERONIN), PTHR11353:SF8(CHAPERONIN 60 SUBUNIT BETA 1, CHLOROPLASTIC-RELATED)	KOG0356(Mitochondrial chaperonin, Cpn60/Hsp60p)			GO:0005524(molecular_function: ATP binding), GO:0044267(biological_process: cellular protein metabolic process)	AT1G55490.1	chaperonin 60 beta
MT4Noble_000681	chr1	-	4843163	4844750	0	0	0	0	0	0	0	0	0	0	0	0
Medtr1g017400	chr1	-	4844540	4848969	0.032261	0	0.019702	0	0.019003	0.065681	0.014789	0.018677	0	0	0	0	AP2-like ethylene-responsive transcription factor	PF00847(AP2 domain)	PTHR11795(UNCHARACTERIZED), PTHR11795:SF332()				GO:0003700(molecular_function: sequence-specific DNA binding transcription factor activity), GO:0006355(biological_process: regulation of transcription, DNA-templated)	AT4G37750.1	Integrase-type DNA-binding superfamily protein
Medtr1g017450	chr1	-	4866395	4869439	120.868	101.726	116.202	154.576	127.395	148.257	174.541	183.729	167.365	156.043	155.531	138.087	transmembrane protein, putative	PF11255(Protein of unknown function (DUF3054))						AT1G44920.1
Medtr1g017490	chr1	+	4900623	4905273	5.50451	5.70451	7.26052	6.07766	5.34537	3.41927	5.71468	5.25755	6.64586	3.64198	2.48915	2.06883	growth-regulating factor	PF08880(QLQ), PF08879(WRC)					GO:0005524(molecular_function: ATP binding), GO:0016818(molecular_function: hydrolase activity, acting on acid anhydrides, in phosphorus-containing anhydrides), GO:0006355(biological_process: regulation of transcription, DNA-templated), GO:0005634(cellular_component: nucleus)	AT4G37740.1	growth-regulating factor 2
Medtr1g017500	chr1	+	4910192	4910976	17.9601	20.0775	11.6274	16.0411	18.0989	22.8471	14.8091	10.9061	12.5124	21.1567	24.7622	18.2526	hypothetical protein
Medtr1g017520	chr1	+	4919114	4935894	25.1603	26.0964	26.1477	26.4557	27.9786	23.9017	17.6763	22.3505	26.1563	24.6288	21.5322	24.1173	pre-mRNA-processing 40A-like protein	PF00397(WW domain), PF01846(FF domain)	PTHR11864(PRE-MRNA-PROCESSING PROTEIN PRP40)	KOG0152(Spliceosomal protein FBP11/Splicing factor PRP40)			GO:0005515(molecular_function: protein binding)	AT1G44910.1	pre-mRNA-processing protein 40A
Medtr1g017530	chr1	-	4936230	4938216	2.36421	1.57217	5.20074	3.47525	1.8052	2.52779	12.9468	10.525	8.10133	0.834127	0.823731	1.40108	hypothetical protein
Medtr1g017540	chr1	-	4942818	4950038	0.072359	0.089057	0.159362	0.214022	0.159588	0.152124	0.174496	0.117054	0.078489	0.023505	0.103094	0.07097	kinesin motor domain protein	PF00225(Kinesin motor domain)	PTHR24115(FAMILY NOT NAMED), PTHR24115:SF177()	KOG0242(Kinesin-like protein)			GO:0003777(molecular_function: microtubule motor activity), GO:0005524(molecular_function: ATP binding), GO:0008017(molecular_function: microtubule binding), GO:0007018(biological_process: microtubule-based movement)	AT1G59540.1	P-loop containing nucleoside triphosphate hydrolases superfamily protein
Medtr1g017570	chr1	-	4961484	4962368	0.186635	0.121551	0	0.172148	0.044134	0.047775	0.226965	0.052419	0.051073	0.285228	0.126985	0.339402	basic leucine zipper transcription factor	PF00170(bZIP transcription factor)					GO:0003700(molecular_function: sequence-specific DNA binding transcription factor activity), GO:0043565(molecular_function: sequence-specific DNA binding), GO:0006355(biological_process: regulation of transcription, DNA-templated)	AT3G49760.1	basic leucine-zipper 5
Medtr1g017590	chr1	+	4970344	4970767	0	0	0.20091	0	0	0.010599	0	0	0	0	0	0	phytosulfokine precursor protein	PF06404(Phytosulfokine precursor protein (PSK))					GO:0008083(molecular_function: growth factor activity), GO:0008283(biological_process: cell proliferation), GO:0005576(cellular_component: extracellular region)	AT3G49780.1	phytosulfokine 4 precursor
Medtr1g017700	chr1	+	5034655	5035611	21.2826	21.8721	20.0495	17.7404	18.1759	20.6308	21.2897	17.6417	17.9359	21.6044	23.328	27.877	phytosulfokine precursor protein	PF06404(Phytosulfokine precursor protein (PSK))					GO:0008083(molecular_function: growth factor activity), GO:0008283(biological_process: cell proliferation), GO:0005576(cellular_component: extracellular region)	AT3G49780.1	phytosulfokine 4 precursor
Medtr1g017770	chr1	+	5043580	5045280	4.54054	4.56047	3.02765	3.64567	4.96266	6.00334	2.11013	2.47046	2.10092	3.58717	5.8478	8.16757	E3 ubiquitin ligase PUB14	PF04564(U-box domain)	PTHR22849(WDSAM1 PROTEIN)				GO:0004842(molecular_function: ubiquitin-protein transferase activity), GO:0016567(biological_process: protein ubiquitination), GO:0000151(cellular_component: ubiquitin ligase complex)	AT3G49810.1	ARM repeat superfamily protein
Medtr1g017780	chr1	+	5046332	5048547	23.8337	33.6347	25.3637	27.3435	27.9235	22.5646	38.386	33.5804	24.7172	29.1468	28.3143	25.643	40S ribosomal protein S11-1	PF00366(Ribosomal protein S17)	PTHR10744(40S RIBOSOMAL PROTEIN S11 FAMILY MEMBER)	KOG1728(40S ribosomal protein S11)			GO:0003735(molecular_function: structural constituent of ribosome), GO:0006412(biological_process: translation), GO:0005622(cellular_component: intracellular), GO:0005840(cellular_component: ribosome)	AT5G23740.1	ribosomal protein S11-beta
Medtr1g017820	chr1	-	5065499	5065957	0	0	0	0	0.147849	0.172882	0	0	0	0	0.14568	0.389817	hypothetical protein
Medtr1g017830	chr1	+	5066497	5067776	7.08338	11.8057	6.61606	44.6473	74.4557	31.8873	13.2632	18.7516	20.9462	57.7796	66.6256	81.7928	hypothetical protein							AT1G10140.1	Uncharacterised conserved protein UCP031279
Medtr1g017840	chr1	+	5067896	5068474	0	0	0	0.131454	0.165503	0.258261	0	0	0.13409	0.070482	0.667045	0.426604	hypothetical protein							AT2G04420.1	Polynucleotidyl transferase, ribonuclease H-like superfamily protein
Medtr1g017870	chr1	+	5082312	5088338	5.4078	4.68102	5.33644	7.45237	8.27652	6.37519	5.79307	6.49811	6.64125	8.68314	7.84884	9.10274	FKBP-type peptidyl-prolyl cis-trans isomerase	PF00254(FKBP-type peptidyl-prolyl cis-trans isomerase)	PTHR10516(PEPTIDYL-PROLYL CIS-TRANS ISOMERASE), PTHR10516:SF66()	KOG0543(FKBP-type peptidyl-prolyl cis-trans isomerase)			GO:0006457(biological_process: protein folding)	AT3G25230.2	rotamase FKBP 1
Medtr1g017880	chr1	+	5089826	5097367	18.1962	18.4731	14.6735	19.3666	17.8519	15.8509	19.3623	18.2887	17.0564	19.1359	18.4543	15.5556	transducin/WD-like repeat-protein	PF00400(WD domain, G-beta repeat)	PTHR22841(), PTHR22841:SF4()	KOG2048(WD40 repeat protein)		K14548(Translation: Ribosome biogenesis [BR:ko03009]: UTP4, CIRH1A; U3 small nucleolar RNA-associated protein 4)	GO:0005515(molecular_function: protein binding)	AT4G07410.1	Transducin family protein / WD-40 repeat family protein
Medtr1g017890	chr1	-	5098091	5098753	0.001452	0	0	0	0	0	0.012832	0	0	0.131858	0	0	hypothetical protein							AT1G58460.1
Medtr1g017900	chr1	-	5102115	5103769	4.7683	4.03198	5.03077	4.44398	4.80869	4.52529	4.60618	3.4793	4.86707	4.41492	4.40564	5.66057	hypothetical protein
Medtr1g017910	chr1	-	5105397	5107858	0	0	0	0	0	0	0	0	0	0	0	0	exocyst subunit exo70 family protein	PF03081(Exo70 exocyst complex subunit)	PTHR12542:SF7(EXOCYST COMPLEX COMPONENT 7), PTHR12542(EXOCYST COMPLEX PROTEIN EXO70)	KOG2344(Exocyst component protein and related proteins)			GO:0006887(biological_process: exocytosis), GO:0000145(cellular_component: exocyst)	AT4G31540.1	exocyst subunit exo70 family protein G1
Medtr1g017920	chr1	-	5111821	5113230	0	0	0	0.05407	0.087447	0	0	0	0.032274	0	0.039055	0	hypothetical protein							AT1G27461.1
Medtr1g017940	chr1	+	5119140	5121604	5.14776	5.0373	6.21171	5.12237	5.8876	5.58036	6.12111	6.60869	5.99391	4.96929	6.12351	6.4062	F-box protein	PF00646(F-box domain)					GO:0005515(molecular_function: protein binding)	AT3G12350.1	F-box family protein
Medtr1g017950	chr1	-	5123274	5125455	6.99655	6.23226	8.74951	2.70094	2.82516	4.17352	4.62975	3.27701	3.04281	0.826863	1.80707	0.78286	GATA type zinc finger transcription factor family protein	PF00412(LIM domain)	PTHR24206:SF66(), PTHR24206(FAMILY NOT NAMED)	KOG1700(Regulatory protein MLP and related LIM proteins)			GO:0008270(molecular_function: zinc ion binding)	AT1G10200.1	GATA type zinc finger transcription factor family protein
Medtr1g017990	chr1	+	5145127	5146802	10.6855	14.3518	8.12268	13.8985	16.7553	14.3633	5.27045	8.87248	8.29081	10.8324	12.0618	11.2952	ZCF37, putative							AT1G59590.1	ZCF37
Medtr1g018000	chr1	-	5148392	5152864	8.57099	9.06813	7.86737	8.53346	7.31083	8.60745	7.9156	8.33395	6.9966	7.79082	7.41488	6.89251	ZCW7		PTHR12484(B-LYMPHOCYTE ANTIGEN-RELATED)					AT1G59600.1	ZCW7
Medtr1g018020	chr1	+	5156633	5158557	8.7077	9.77201	9.42794	14.2719	17.666	17.5686	12.3544	11.6032	16.5606	16.4294	18.9165	23.3872	hypothetical protein							AT5G63905.1
Medtr1g018030	chr1	+	5159586	5161518	34.582	28.4551	32.8328	40.9201	38.687	44.166	42.9591	43.6633	42.6878	18.4393	22.9103	18.8997	acyl-CoA N-acyltransferase domain protein	PF00583(Acetyltransferase (GNAT) family)	PTHR13355(GLUCOSAMINE 6-PHOSPHATE N-ACETYLTRANSFERASE)				GO:0008080(molecular_function: N-acetyltransferase activity)	AT1G26220.1	Acyl-CoA N-acyltransferases (NAT) superfamily protein
Medtr1g018040	chr1	-	5162750	5167903	0.062125	0.120703	0.070308	0.040377	0.035022	0.11236	0.013216	0.032175	0.018279	0.009602	0	0.05129	TPR 7B-like protein		PTHR23083(TETRATRICOPEPTIDE REPEAT PROTEIN, TPR), PTHR23083:SF174()	KOG4162(Predicted calmodulin-binding protein)				AT1G27460.1	no pollen germination related 1
Medtr1g018280	chr1	-	5174351	5180825	0.055387	0.021548	0	0.052119	0	0	0	0.030347	0.05768	0	0	0.002036	methionyl-tRNA synthetase	PF09334(tRNA synthetases class I (M))	PTHR11946(ISOLEUCYL, LEUCYL, TYROSYL, VALYL AND METHIONYL-TRNA SYNTHETASES), PTHR11946:SF1(SUBFAMILY NOT NAMED)	KOG0436(Methionyl-tRNA synthetase)			GO:0000166(molecular_function: nucleotide binding), GO:0004812(molecular_function: aminoacyl-tRNA ligase activity), GO:0005524(molecular_function: ATP binding), GO:0006418(biological_process: tRNA aminoacylation for protein translation)	AT3G55400.1	methionyl-tRNA synthetase / methionine--tRNA ligase / MetRS (cpMetRS)
Medtr1g018300	chr1	-	5182045	5185855	0	0.053621	0	0	0	0	0.042773	0	0	0	0.123411	0	hypothetical protein
Medtr1g018320	chr1	+	5202292	5203901	122.624	125.237	144.22	78.6172	113.232	87.4732	54.9618	58.7038	61.6095	84.5725	87.3344	84.0005	sigma factor sigb regulation rsbq-like protein	PF00561(alpha/beta hydrolase fold)	PTHR10992(ALPHA/BETA HYDROLASE FOLD-CONTAINING PROTEIN), PTHR10992:SF13()	KOG1454(Predicted hydrolase/acyltransferase (alpha/beta hydrolase superfamily))				AT3G03990.1	alpha/beta-Hydrolases superfamily protein
Medtr1g018180	chr1	-	5219153	5221615	51.9895	45.4995	45.9976	52.0164	54.9127	47.6756	43.404	48.1295	50.0362	50.7651	49.4035	47.6101	armadillo/beta-catenin-like repeat protein	PF00514(Armadillo/beta-catenin-like repeat)	PTHR23315:SF35(), PTHR23315(BETA CATENIN-RELATED ARMADILLO REPEAT-CONTAINING)				GO:0005515(molecular_function: protein binding)	AT3G01400.1	ARM repeat superfamily protein
Medtr1g018200	chr1	+	5228214	5233730	4.53531	4.7759	4.53512	1.84295	0.952147	1.41585	0.675206	0.968163	0.545192	0.421298	1.12761	0.597905	beta-like galactosidase	PF01301(Glycosyl hydrolases family 35)	PTHR23421(BETA-GALACTOSIDASE RELATED), PTHR23421:SF33()	KOG0496(Beta-galactosidase)	3.2.1.23(Beta-galactosidase.)	K01190(Glycan biosynthesis and metabolism: Other glycan degradation [PATH:ko00511]: lacZ; beta-galactosidase)	GO:0004553(molecular_function: hydrolase activity, hydrolyzing O-glycosyl compounds), GO:0005975(biological_process: carbohydrate metabolic process)	AT4G26140.1	beta-galactosidase 12
Medtr1g018205	chr1	+	5242717	5245592	8.17206	8.80974	7.21221	7.79424	7.57072	6.11714	8.55477	7.82692	7.57302	9.1855	7.15309	6.77403	porin/voltage-dependent anion-selective channel protein	PF01459(Eukaryotic porin)	PTHR11743:SF14(), PTHR11743(VOLTAGE-DEPENDENT ANION-SELECTIVE CHANNEL)	KOG3126(Porin/voltage-dependent anion-selective channel protein)			GO:0055085(biological_process: transmembrane transport), GO:0005741(cellular_component: mitochondrial outer membrane)	AT5G67500.1	voltage dependent anion channel 2
Medtr1g018140	chr1	-	5249033	5250181	7.25361	9.45178	5.59955	9.14947	11.9764	9.87057	6.78512	7.31623	7.52171	11.9319	14.1291	16.3407	F-box/kelch-repeat plant protein	PF00646(F-box domain)					GO:0005515(molecular_function: protein binding)	AT5G43190.1	Galactose oxidase/kelch repeat superfamily protein
Medtr1g018130	chr1	+	5253026	5255447	0.139211	0	0	0.144479	0.045941	0.041904	0	0.002335	0.093029	0.05888	0.076139	0.052058	transmembrane protein, putative							AT5G46295.1
Medtr1g018350	chr1	-	5255703	5269271	7.03403	7.41775	7.4354	5.87558	6.60027	6.0143	5.74411	6.06016	6.31483	8.15546	6.95596	7.50677	SPOC domain protein	PF07744(SPOC domain)						AT1G27750.1	nucleic acid binding
MT4Noble_000730	chr1	+	5258517	5259196	0.129627	0.12786	0	0.150975	0	0.210647	0.12693	0.593604	0.458738	0.257855	0.094658	0.301655
Medtr1g018420	chr1	+	5294238	5295310	101.946	101.474	35.5108	275.442	239.336	193.768	74.4687	82.8129	141.459	239.982	281.009	250.394	C2H2-type zinc finger protein		PTHR26374(FAMILY NOT NAMED), PTHR26374:SF459()					AT1G27730.1	salt tolerance zinc finger
Medtr1g018440	chr1	-	5309252	5313894	0.641979	0.667229	0.565224	0.249142	0.263544	0.294512	0.219444	0.356473	0.253451	0.059997	0.086442	0.173083	DUF566 family protein	PF04484(Family of unknown function (DUF566) )						AT1G49890.1	Family of unknown function (DUF566)
Medtr1g018470	chr1	-	5331283	5333355	2.16325	2.98578	2.91618	2.88691	2.61814	3.54463	4.35308	3.94575	3.94823	3.3245	2.31029	2.90692	transmembrane protein, putative							AT5G01075.1	Glycosyl hydrolase family 35 protein
Medtr1g018480	chr1	+	5334173	5343203	1.74259	1.50074	1.57798	2.02128	2.09912	1.60768	1.60638	1.88192	2.04858	2.23326	1.96721	1.86866	calcium-binding EF hand-like protein		PTHR11216:SF12(), PTHR11216(EH DOMAIN)	KOG0998(Synaptic vesicle protein EHS-1 and related EH domain proteins)				AT1G21630.1	Calcium-binding EF hand family protein
Medtr1g418505	chr1	-	5349002	5351440	1.71837	2.28676	2.24814	2.41509	2.03966	2.73477	4.28403	3.49263	3.06507	2.25635	2.15616	2.38081	transmembrane protein, putative							AT5G01075.1	Glycosyl hydrolase family 35 protein
Medtr1g418545	chr1	+	5360731	5364929	8.48405	7.90112	10.9554	15.4549	15.1469	14.0992	11.4295	12.4509	14.983	14.0279	18.2363	25.982	acyl-CoA-binding domain protein	PF00887(Acyl CoA binding protein)	PTHR23310:SF14(PROTEIN ACBP-7), PTHR23310(ACYL-COA-BINDING PROTEIN, ACBP)	KOG0817(Acyl-CoA-binding protein)			GO:0000062(molecular_function: fatty-acyl-CoA binding)	AT4G24230.6	acyl-CoA-binding domain 3
Medtr1g018510	chr1	+	5374250	5376769	24.8144	19.7199	21.4066	17.2849	13.5775	21.7293	15.7115	17.9403	20.5359	34.6596	21.6302	28.4566	subtilisin-like serine protease	PF00082(Subtilase family), PF05922(Peptidase inhibitor I9), PF02225(PA domain)	PTHR10795(PROPROTEIN CONVERTASE SUBTILISIN/KEXIN), PTHR10795:SF17()				GO:0004252(molecular_function: serine-type endopeptidase activity), GO:0006508(biological_process: proteolysis), GO:0042802(molecular_function: identical protein binding), GO:0043086(biological_process: negative regulation of catalytic activity)	AT5G67360.1	Subtilase family protein
Medtr1g018515	chr1	+	5377489	5378250	0	0	0	0	0	0	0	0	0	0	0.177068	0	hypothetical protein
Medtr1g018550	chr1	+	5385012	5387942	20.3988	30.3033	20.9643	16.2564	25.022	15.9592	11.6326	13.8757	15.1511	15.2889	16.6007	15.9538	syntaxin 6, amine-terminal protein	PF09177(Syntaxin 6, N-terminal)					GO:0048193(biological_process: Golgi vesicle transport), GO:0016020(cellular_component: membrane)	AT1G27700.1	Syntaxin/t-SNARE family protein
MT4Noble_000744	chr1	+	5389734	5390434	0	0.212115	0	0.135729	0	0	0	0.335046	0	0.008765	0	0
MT4Noble_000745	chr1	-	5390517	5396777	0.496815	0.376095	0.365505	0.195729	0.143063	0.370661	0.172372	0.175178	0.115532	0.081925	0.231707	0.200371	VEP1 , putative
Medtr1g018580	chr1	-	5390686	5392038	0.290633	0.27503	0.327715	0.277243	0.178124	0.192206	0.160004	0.066468	0.068165	0.268083	0.804974	0.949362	3-oxo-delta(4,5)-steroid 5-beta-reductase-like protein							AT4G24220.2	NAD(P)-binding Rossmann-fold superfamily protein
Medtr1g018590	chr1	-	5394224	5395861	2.06876	1.48751	1.37692	0.676984	0.528493	1.45783	0.611032	0.742385	0.444968	0.145296	0.380283	0.09484	3-oxo-delta(4,5)-steroid 5-beta-reductase-like protein							AT4G24220.1	NAD(P)-binding Rossmann-fold superfamily protein
Medtr1g018600	chr1	+	5398549	5398860	0	0	0	0	0	0	0	0	0	0	0	0	RALF related
Medtr1g018610	chr1	-	5399279	5402250	0.400304	0.616806	0.426058	0.824499	0.438914	0.539768	0.428351	0.088084	0.081131	0.952769	2.60551	2.17813	3-oxo-delta(4,5)-steroid 5-beta-reductase-like protein		PTHR10366(NAD DEPENDENT EPIMERASE/DEHYDRATASE), PTHR10366:SF164()					AT4G24220.1	NAD(P)-binding Rossmann-fold superfamily protein
MT4Noble_000750	chr1	-	5404796	5405940	0.208223	0.800986	0.260815	0.183425	0.436003	0.659218	0.27468	0.199947	0.162418	0.386217	0.244702	0.346297
Medtr1g018620	chr1	-	5405529	5409257	11.0162	12.5653	11.1274	9.65204	10.0372	9.80357	7.85598	8.264	9.04472	8.69696	8.7416	8.67278	lipase	PF04788(Protein of unknown function (DUF620))						AT3G19540.1	Protein of unknown function (DUF620)
Medtr1g018640	chr1	+	5418673	5420217	4.5633	6.22454	5.57731	6.46111	12.5376	10.4372	3.86303	3.28983	1.65723	8.22599	12.4319	24.1795	gibberellin-regulated family protein	PF02704(Gibberellin regulated protein)						AT5G59845.1	Gibberellin-regulated family protein
Medtr1g018650	chr1	-	5420514	5422995	0.201646	0.03428	0.253453	0	0	0	0.065047	0.066291	0.024348	0.051978	0.04271	0.079946	ubiquitin-protein ligase, putative		PTHR12183(UNCHARACTERIZED RING ZINC FINGER-CONTAINING PROTEIN)	KOG4172(Predicted E3 ubiquitin ligase)				AT2G38185.1	RING/U-box superfamily protein
Medtr1g018680	chr1	+	5434143	5436837	2.2401	2.1339	3.13797	3.69856	3.97041	2.49291	2.65789	2.46852	3.08893	3.53039	5.0721	4.4691	carboxy-terminal domain cyclin	PF00134(Cyclin, N-terminal domain), PF02984(Cyclin, C-terminal domain)	PTHR10177:SF49(), PTHR10177(CYCLINE)	KOG0654(G2/Mitotic-specific cyclin A)		K06627(Infectious diseases: Human papillomavirus infection [PATH:ko05165]: CCNA; cyclin-A)	GO:0005634(cellular_component: nucleus)	AT5G43080.1	Cyclin A3;1
MT4Noble_000756	chr1	+	5436972	5439482	0.290859	0.1596	0.034434	0.624435	0.295384	0.377441	0.350239	0.484233	0.320363	0.105779	0.505896	0.577662
Medtr1g018710	chr1	+	5453115	5453931	1.85208	1.56072	2.33634	1.63552	1.59284	0.810772	1.60571	1.52592	1.57691	2.34815	2.02984	0.82904	MFP1 attachment factor-like protein							AT1G47200.1	WPP domain protein 2
Medtr1g018740	chr1	-	5461098	5461352	0	0	0	0	0	0	0	0	0	0.179833	0.118992	0	transmembrane protein, putative
Medtr1g018750	chr1	+	5467077	5470172	0.02673	0.097233	0.127973	0.048203	0	0.027187	0.048274	0	0.029657	0	0	0	carbohydrate esterase plant-like protein	PF03629(Domain of unknown function (DUF303) )						AT4G34215.1	Domain of unknown function (DUF303)
Medtr1g018760	chr1	-	5478973	5481406	12.6418	15.7951	22.7906	21.0735	17.8547	16.6126	9.87381	11.9828	13.3631	22.7327	18.7296	19.3583	isoaspartyl peptidase/L-asparaginase	PF01112(Asparaginase)	PTHR10188(L-ASPARAGINASE)	KOG1592(Asparaginase)	3.4.19.5(Beta-aspartyl-peptidase.)	K13051(Enzyme families: Peptidases [BR:ko01002]: iaaA, ASRGL1; beta-aspartyl-peptidase (threonine type))	GO:0016787(molecular_function: hydrolase activity)	AT3G16150.1	N-terminal nucleophile aminohydrolases (Ntn hydrolases) superfamily protein
Medtr1g018785	chr1	-	5500008	5503177	0	0	0	0	0	0	0	0.002388	0	0	0	0	endonuclease/exonuclease/phosphatase family protein	PF03372(Endonuclease/Exonuclease/phosphatase family)						AT1G43760.1	DNAse I-like superfamily protein
Medtr1g018790	chr1	+	5512021	5514514	31.8793	34.0421	32.6479	30.9441	35.2897	31.5724	31.5142	30.1418	30.5581	38.1221	38.7007	36.4103	F-box SKIP2-like protein	PF00646(F-box domain)	PTHR23125(), PTHR23125:SF44()	KOG1947(Leucine rich repeat proteins, some proteins contain F-box)			GO:0005515(molecular_function: protein binding)	AT1G47056.1	VIER F-box proteine 1
MT4Noble_000768	chr1	-	5514980	5515278	0	0	0.193835	0	0	0	0	0	0	0.035492	0	0.004645
Medtr1g018800	chr1	-	5515974	5523703	34.1372	36.1943	29.2534	30.412	35.5325	30.8253	32.2559	29.8081	31.9309	37.8385	39.9282	43.632	mannose-P-dolichol utilization defect 1-like protein	PF04193(PQ loop repeat )	PTHR12226:SF2(MANNOSE-P-DOLICHOL UTILIZATION DEFECT 1 PROTEIN), PTHR12226(MANNOSE-P-DOLICHOL UTILIZATION DEFECT 1 LEC35 -RELATED)					AT4G07390.1	Mannose-P-dolichol utilization defect 1 protein
Medtr1g018805	chr1	+	5518419	5519222	1.32146	0.960754	0.357323	0.918037	0.672777	1.15423	1.10765	0.813413	0.479966	1.48902	1.14361	1.0635	hypothetical protein
Medtr1g018810	chr1	+	5530162	5532703	0.89682	0.949319	1.57126	0.969927	0.537995	0.943486	0.742191	0.962198	1.06637	0.111792	0.247525	0.16737	transcription factor-like protein		PTHR13902:SF3(GB|AAF34833.1-RELATED), PTHR13902(SERINE/THREONINE-PROTEIN KINASE WNK WITH NO LYSINE -RELATED)					AT1G60060.1	Serine/threonine-protein kinase WNK (With No Lysine)-related
Medtr1g018820	chr1	-	5538473	5539256	0	0	0	0	0	0	0	0	0	0	0	0	1,3-beta-glucan synthase subunit FKS1 domain 1 protein		PTHR12741(LYST-INTERACTING PROTEIN LIP5 DOPAMINE RESPONSIVE PROTEIN DRG-1), PTHR12741:SF4(VACUOLAR PROTEIN SORTING-ASSOCIATED PROTEIN VTA1 HOMOLOG)					AT2G13680.1	callose synthase 5
Medtr1g018830	chr1	-	5542120	5545314	0.316758	0.525279	0.7652	0.479614	0.134913	0.413405	0.664077	0.862837	0.80858	0.197105	0.177833	0.247357	hypothetical protein							AT1G26130.2	ATPase E1-E2 type family protein / haloacid dehalogenase-like hydrolase family protein
Medtr1g018840	chr1	-	5545981	5550841	1148.46	1147.19	1000.9	1154.25	1424.73	1340.99	1036.07	981.998	1273.8	2250.36	2501.22	2938.78	papain family cysteine protease	PF00396(Granulin), PF00112(Papain family cysteine protease), PF08246(Cathepsin propeptide inhibitor domain (I29))	PTHR12411:SF44(), PTHR12411(CYSTEINE PROTEASE FAMILY C1-RELATED)	KOG1543(Cysteine proteinase Cathepsin L)	3.4.22.-()	K01376(Enzyme families: Peptidases [BR:ko01002]: UFSP2; UFM1-specific protease 2)	GO:0008234(molecular_function: cysteine-type peptidase activity), GO:0006508(biological_process: proteolysis)	AT1G47128.1	Granulin repeat cysteine protease family protein
Medtr1g018910	chr1	-	5570944	5572370	0.481343	0.255994	0.163643	0.531412	0.323583	0.668336	0.710014	0.888699	1.04439	0.61662	0.570966	0.692485	Serine/Threonine kinase, plant-type protein, putative		PTHR24420:SF937(), PTHR24420()	KOG0617(Ras suppressor protein (contains leucine-rich repeats))				AT4G06744.1	Leucine-rich repeat (LRR) family protein
Medtr1g018930	chr1	+	5577520	5581331	3.19638	3.6759	3.42914	6.30117	4.59894	3.87217	5.02384	5.01933	4.55695	5.76059	6.69345	7.80125	hypothetical protein							AT5G47830.1
Medtr1g018940	chr1	-	5582864	5593316	10.2538	9.3993	11.7725	8.74639	8.73761	8.42137	8.3101	9.40482	9.20659	7.57902	6.3611	6.22525	chromosome-associated kinesin KIF4A-like protein	PF00225(Kinesin motor domain)	PTHR24115(FAMILY NOT NAMED), PTHR24115:SF174()	KOG0244(Kinesin-like protein)		K10395(Cell motility: Cytoskeleton proteins [BR:ko04812]: KIF4_21_27; kinesin family member 4/21/27)	GO:0003777(molecular_function: microtubule motor activity), GO:0005524(molecular_function: ATP binding), GO:0008017(molecular_function: microtubule binding), GO:0007018(biological_process: microtubule-based movement)	AT5G47820.1	P-loop containing nucleoside triphosphate hydrolases superfamily protein
MT4Noble_000778	chr1	+	5607968	5609131	0	0	0	0	0	0	0	0	0	0	0	0.001581	RNA-directed DNA polymerase , related
Medtr1g018970	chr1	+	5618721	5624026	0	0.060852	0.127054	0.048257	0	0.069211	0.049669	0.025225	0.044802	0	0.376197	0.100044	long chain base biosynthesis protein 1a	PF00155(Aminotransferase class I and II)	PTHR13693:SF2(SERINE PALMITOYLTRANSFERASE 1), PTHR13693(CLASS II AMINOTRANSFERASE/8-AMINO-7-OXONONANOATE SYNTHASE)				GO:0030170(molecular_function: pyridoxal phosphate binding), GO:0009058(biological_process: biosynthetic process)	AT4G36480.1	long-chain base1
Medtr1g018990	chr1	-	5634166	5635581	0.173375	0.1145	0.405805	0.065399	0.173771	0.17217	0.179737	0.246235	0.239066	0.121568	0.013104	0.006092	transmembrane protein, putative
Medtr1g019000	chr1	+	5638339	5639351	0	0.034784	0	0	0	0	0	0	0	0	0.006675	0	class I/II aminotransferase	PF00155(Aminotransferase class I and II)	PTHR13693:SF2(SERINE PALMITOYLTRANSFERASE 1), PTHR13693(CLASS II AMINOTRANSFERASE/8-AMINO-7-OXONONANOATE SYNTHASE)				GO:0030170(molecular_function: pyridoxal phosphate binding), GO:0009058(biological_process: biosynthetic process)	AT4G36480.1	long-chain base1
Medtr1g019005	chr1	-	5640155	5640475	0	0	0	0	0	0	0	0	0	0	0	0.075341	hypothetical protein
Medtr1g019030	chr1	+	5651148	5651736	0	0	0	0	0	0	0	0	0	0	0	0	serine palmitoyltransferase long chain base subunit, putative		PTHR13693:SF2(SERINE PALMITOYLTRANSFERASE 1), PTHR13693(CLASS II AMINOTRANSFERASE/8-AMINO-7-OXONONANOATE SYNTHASE)					AT4G36480.1	long-chain base1
Medtr1g019040	chr1	-	5654657	5656781	0.106249	0.042094	0	0.039208	0.102137	0.15199	0.096233	0.023938	0.118834	0.288506	0.270613	0.233608	SPla/RYanodine receptor (SPRY) domain protein	PF00622(SPRY domain)					GO:0005515(molecular_function: protein binding)	AT4G06536.1	SPla/RYanodine receptor (SPRY) domain-containing protein
Medtr1g019050	chr1	+	5659533	5662682	7.59732	5.12201	5.31897	9.71027	7.81494	9.03958	9.20854	9.68937	9.52856	7.7363	8.36477	8.72043	NYN domain protein	PF01936(NYN domain)						AT5G52010.1	C2H2-like zinc finger protein
Medtr1g019110	chr1	+	5681145	5682526	3.58831	4.37654	3.43212	5.90651	12.7344	6.19263	12.7303	13.5092	10.7918	23.1249	26.669	28.7958	dehydration-responsive element-binding protein	PF00847(AP2 domain)				K09286(Transcription: Transcription factors [BR:ko03000]: EREBP; EREBP-like factor)	GO:0003700(molecular_function: sequence-specific DNA binding transcription factor activity), GO:0006355(biological_process: regulation of transcription, DNA-templated)	AT2G23340.1	DREB and EAR motif protein 3
Medtr1g019120	chr1	-	5685913	5691251	8.02904	7.49405	9.11911	7.5875	6.19777	7.97317	7.94212	7.2542	8.43706	8.1505	8.41904	10.2107	zinc finger C-x8-C-x5-C-x3-H type family protein, putative							AT1G19860.1	Zinc finger C-x8-C-x5-C-x3-H type family protein
Medtr1g019130	chr1	+	5704096	5705687	0.174353	0.170082	0.082013	0	0.041901	0.141891	0.031625	0	0.039053	0.213027	0.071369	0.079181	wuschel-related homeobox protein	PF00046(Homeobox domain)					GO:0003700(molecular_function: sequence-specific DNA binding transcription factor activity), GO:0043565(molecular_function: sequence-specific DNA binding), GO:0006355(biological_process: regulation of transcription, DNA-templated)	AT1G46480.1	WUSCHEL related homeobox 4
Medtr1g019150	chr1	+	5708406	5713691	45.6101	51.4229	45.6292	47.2056	44.4558	41.0614	53.2627	47.3538	42.5188	47.4173	47.666	46.1832	polyadenylate-binding protein	PF00658(Poly-adenylate binding protein, unique domain), PF00076(RNA recognition motif. (a.k.a. RRM, RBD, or RNP domain))	PTHR24011(), PTHR24011:SF69()	KOG0123(Polyadenylate-binding protein (RRM superfamily))		K13126(Folding, sorting and degradation: RNA degradation [PATH:ko03018]: PABPC; polyadenylate-binding protein)	GO:0003676(molecular_function: nucleic acid binding), GO:0003723(molecular_function: RNA binding)	AT4G34110.1	poly(A) binding protein 2
Medtr1g019170	chr1	+	5720163	5724512	9.72248	7.88314	7.54153	9.72628	8.09728	9.98352	8.71986	10.3405	6.10093	9.61202	10.789	6.24049	plant organelle RNA recognition domain protein	PF11955(Plant organelle RNA recognition domain)						AT2G31290.1	Ubiquitin carboxyl-terminal hydrolase family protein
Medtr1g019190	chr1	+	5731512	5731973	0	0	0	0	0	0	0	0	0	0	0.003649	0	hypothetical protein
MT4Noble_000797	chr1	+	5734278	5734400	0	0	0.273723	0.048553	0	0.233748	0	0	0.233733	0.283895	0.047207	0.234635
Medtr1g019200	chr1	+	5740491	5747161	15.1761	14.2066	13.3608	15.3001	15.5413	14.6878	13.546	13.8359	14.6045	17.1555	16.3076	17.7484	zinc finger (C3HC4-type RING finger) family protein	PF00097(Zinc finger, C3HC4 type (RING finger))	PTHR14155(RING FINGER DOMAIN-CONTAINING), PTHR14155:SF21()				GO:0046872(molecular_function: metal ion binding)	AT5G42940.1	RING/U-box superfamily protein
Medtr1g019220	chr1	+	5748373	5748804	0	0	0	0	0	0	0	0	0	0	0	0	hypothetical protein
Medtr1g019230	chr1	-	5752640	5752897	0	0	0	0	0	0	0	0	0	0	0	0	NADH-quinone oxidoreductase protein	PF00361(Proton-conducting membrane transporter)	PTHR22773:SF41(NADH-UBIQUINONE OXIDOREDUCTASE CHAIN 2), PTHR22773(NADH DEHYDROGENASE)				GO:0008137(molecular_function: NADH dehydrogenase (ubiquinone) activity), GO:0055114(biological_process: oxidation-reduction process)	ATCG00890.1	NADH-Ubiquinone/plastoquinone (complex I) protein
Medtr1g019240	chr1	+	5755377	5757645	0	0.041218	0	0.037879	0.430671	0	0	0.039931	0.004598	0.156624	0.633992	1.46827	helix loop helix DNA-binding domain protein	PF00010(Helix-loop-helix DNA-binding domain)	PTHR10014:SF30(), PTHR10014()				GO:0046983(molecular_function: protein dimerization activity)	AT4G36930.1	basic helix-loop-helix (bHLH) DNA-binding superfamily protein
Medtr1g019250	chr1	+	5760299	5762861	23.7958	25.7698	28.5987	24.2886	23.5904	22.8535	18.6002	21.1633	23.2502	25.4269	23.8438	30.4106	SBP (S-ribonuclease-binding protein) family protein		PTHR12183(UNCHARACTERIZED RING ZINC FINGER-CONTAINING PROTEIN)	KOG1100(Predicted E3 ubiquitin ligase)				AT1G45976.1	S-ribonuclease binding protein 1
Medtr1g019265	chr1	+	5769810	5773501	0	0	0	0	0	0	0	0	0	0	0	0	hypothetical protein
Medtr1g019270	chr1	+	5774038	5777522	1.20166	1.05995	0.829259	0.084475	0.109663	0.206759	0.082078	0.050717	0.034921	0	0.124419	0.154441	triacylglycerol lipase-like protein	PF01764(Lipase (class 3))	PTHR10992:SF274(), PTHR10992(ALPHA/BETA HYDROLASE FOLD-CONTAINING PROTEIN)	KOG4569(Predicted lipase)			GO:0004806(molecular_function: triglyceride lipase activity), GO:0006629(biological_process: lipid metabolic process)	AT5G42930.1	alpha/beta-Hydrolases superfamily protein
Medtr1g019280	chr1	-	5777571	5782200	2.17688	1.87001	2.8681	0.939485	1.37261	1.1765	1.63291	1.23163	0.994099	0.530584	0.421204	0.54742	carboxy-terminal region remorin	PF03763(Remorin, C-terminal region )						AT1G45207.2	Remorin family protein
Medtr1g019285	chr1	-	5790594	5791134	0.994713	1.07322	0.66933	1.82278	1.45702	1.68117	1.11904	1.65866	2.98327	2.19621	2.04695	2.98371	hypothetical protein
Medtr1g019290	chr1	-	5791136	5798977	1.62306	2.06213	2.3819	2.3901	2.71689	3.06791	2.28149	2.74975	2.88078	2.47203	2.84983	3.00116	RNA cap guanine-N2 methyltransferase	PF00397(WW domain), PF09445(RNA cap guanine-N2 methyltransferase)	PTHR14741(S-ADENOSYLMETHIONINE-DEPENDENT METHYLTRANSFERASE RELATED), PTHR14741:SF23()	KOG2730(Methylase)	2.1.1.-()	K14292(Translation: RNA transport [PATH:ko03013]: TGS1; trimethylguanosine synthase)	GO:0005515(molecular_function: protein binding), GO:0008168(molecular_function: methyltransferase activity), GO:0001510(biological_process: RNA methylation), GO:0009452(biological_process: 7-methylguanosine RNA capping)	AT1G45231.2	S-adenosyl-L-methionine-dependent methyltransferases superfamily protein
Medtr1g019320	chr1	-	5805004	5805379	0	0	0	0.151473	0.19636	0	0.067751	0	0.026926	0	0.178837	0	hypothetical protein
Medtr1g019340	chr1	+	5812524	5819995	29.5935	28.8657	25.5139	21.9666	25.5367	25.9813	21.472	20.5414	23.4314	24.5614	25.1885	23.0689	AGC kinase	PF00069(Protein kinase domain)	PTHR24356:SF32(), PTHR24356(SERINE/THREONINE-PROTEIN KINASE)	KOG0605(NDR and related serine/threonine kinases)			GO:0004672(molecular_function: protein kinase activity), GO:0005524(molecular_function: ATP binding), GO:0006468(biological_process: protein phosphorylation)	AT5G09890.2	Protein kinase family protein
Medtr1g019360	chr1	+	5822836	5825887	68.1537	54.7861	63.5518	80.0387	67.1683	64.6569	64.3231	71.5966	71.6912	70.2378	68.5572	60.3499	cold regulated protein, putative							AT5G42900.1	cold regulated gene 27
Medtr1g019370	chr1	-	5829992	5830207	0	0.155551	0	0.071768	0	0	0	0.187568	0	0.147054	0	0.003732	hypothetical protein
Medtr1g019410	chr1	+	5858845	5862486	16.5449	11.0997	8.64773	13.6387	12.0418	18.2543	12.4866	16.5668	13.4064	17.9718	10.5966	8.2148	cytochrome P450 family ABA 8'-hydroxylase	PF00067(Cytochrome P450)	PTHR24286(FAMILY NOT NAMED), PTHR24286:SF63(SUBFAMILY NOT NAMED)	KOG0157(Cytochrome P450 CYP4/CYP19/CYP26 subfamilies)			GO:0005506(molecular_function: iron ion binding), GO:0016705(molecular_function: oxidoreductase activity, acting on paired donors, with incorporation or reduction of molecular oxygen), GO:0020037(molecular_function: heme binding), GO:0055114(biological_process: oxidation-reduction process)	AT3G19270.1	cytochrome P450, family 707, subfamily A, polypeptide 4
Medtr1g019430	chr1	+	5867188	5869097	44.6239	42.935	33.4545	52.0894	47.3381	48.417	50.2854	49.3904	49.6044	51.0915	58.148	61.7773	sterol carrier protein, putative	PF02036(SCP-2 sterol transfer family)	PTHR10094:SF8(), PTHR10094(STEROL CARRIER PROTEIN 2 SCP-2 FAMILY PROTEIN)	KOG4170(2-enoyl-CoA hydratase/3-hydroxyacyl-CoA dehydrogenase/Peroxisomal 3-ketoacyl-CoA-thiolase, sterol-binding domain and related enzymes)			GO:0032934(molecular_function: sterol binding)	AT5G42890.1	sterol carrier protein 2
Medtr1g019440	chr1	+	5870673	5873171	9.5283	10.6567	6.47326	22.5031	32.0287	24.5341	24.5203	23.115	20.4578	45.0931	50.6999	64.4143	alpha amylase domain protein	PF07821(Alpha-amylase C-terminal beta-sheet domain), PF00128(Alpha amylase, catalytic domain)	PTHR10357(ALPHA-AMYLASE), PTHR10357:SF9()	KOG0471(Alpha-amylase)	3.2.1.1(Alpha-amylase.)	K01176(Digestive system: Carbohydrate digestion and absorption [PATH:ko04973]: AMY, amyA, malS; alpha-amylase)	GO:0003824(molecular_function: catalytic activity), GO:0043169(molecular_function: cation binding), GO:0005975(biological_process: carbohydrate metabolic process), GO:0004556(molecular_function: alpha-amylase activity), GO:0005509(molecular_function: calcium ion binding)	AT4G25000.1	alpha-amylase-like
Medtr1g019450	chr1	-	5874645	5875769	0	0	0	0	0	0	0	0	0	0	0	0	transducin family protein/WD-40 repeat protein							AT1G15750.1	Transducin family protein / WD-40 repeat family protein
Medtr1g019460	chr1	+	5876457	5876699	0	0	0	0.025028	0	0	0	0	0	0	0	0	alpha-amylase, putative							AT4G25000.1	alpha-amylase-like
Medtr1g019470	chr1	-	5878364	5879658	0	0	0	0	0	0	0	0	0	0.105706	0	0	transducin family protein/WD-40 repeat protein							AT1G15750.1	Transducin family protein / WD-40 repeat family protein
Medtr1g019480	chr1	+	5884776	5886764	2.11002	1.59219	0.961639	1.29714	2.90034	1.42988	1.25659	0.329226	1.16697	1.79698	2.49164	2.26015	alpha amylase domain protein	PF00128(Alpha amylase, catalytic domain), PF07821(Alpha-amylase C-terminal beta-sheet domain)	PTHR10357:SF9(), PTHR10357(ALPHA-AMYLASE)	KOG0471(Alpha-amylase)			GO:0003824(molecular_function: catalytic activity), GO:0043169(molecular_function: cation binding), GO:0005975(biological_process: carbohydrate metabolic process), GO:0004556(molecular_function: alpha-amylase activity), GO:0005509(molecular_function: calcium ion binding)	AT4G25000.1	alpha-amylase-like
Medtr1g019490	chr1	-	5887207	5891628	7.71163	8.66728	5.72729	8.59583	8.60606	9.02593	5.72827	5.97096	8.41365	11.6433	13.1995	15.001	WEAK movement UNDER BLUE LIGHT-like protein	PF05701(Weak chloroplast movement under blue light)						AT2G26570.1	Plant protein of unknown function (DUF827)
Medtr1g019500	chr1	+	5893226	5901376	10.2013	10.1632	10.2695	9.06047	9.27823	8.58504	10.447	8.87916	8.99268	10.2521	9.87771	9.9689	vacuolar protein sorting-associated-like protein	PF12451(Vacuolar protein sorting protein 11 C terminal), PF00637(Region in Clathrin and VPS)	PTHR23323:SF24(VACUOLAR PROTEIN SORTING-ASSOCIATED PROTEIN 11 HOMOLOG), PTHR23323(VACUOLAR MEMBRANE PROTEIN RELATED)	KOG2114(Vacuolar assembly/sorting protein PEP5/VPS11)			GO:0006886(biological_process: intracellular protein transport), GO:0016192(biological_process: vesicle-mediated transport)	AT2G05170.1	vacuolar protein sorting 11
Medtr1g019510	chr1	+	5901617	5903233	0.045161	0.051134	0.060617	0.070566	0.030091	0.026148	0.023639	0.02869	0	0.127488	0.507351	1.52395	UDP-glucosyltransferase family protein	PF00201(UDP-glucoronosyl and UDP-glucosyl transferase)	PTHR11926(GLUCOSYL/GLUCURONOSYL TRANSFERASES), PTHR11926:SF15()	KOG1192(UDP-glucuronosyl and UDP-glucosyl transferase)			GO:0016758(molecular_function: transferase activity, transferring hexosyl groups), GO:0008152(biological_process: metabolic process)	AT4G01070.1	UDP-Glycosyltransferase superfamily protein
Medtr1g019520	chr1	+	5905885	5906544	0	0	0	0	0	0	0.001325	0	0	0	0	0	UDP-glucosyltransferase family protein	PF00201(UDP-glucoronosyl and UDP-glucosyl transferase)	PTHR11926(GLUCOSYL/GLUCURONOSYL TRANSFERASES), PTHR11926:SF15()				GO:0016758(molecular_function: transferase activity, transferring hexosyl groups), GO:0008152(biological_process: metabolic process)	AT4G01070.1	UDP-Glycosyltransferase superfamily protein
Medtr1g019530	chr1	-	5908088	5910626	0	0	0	0	0	0	0	0	0	0	0	0	UDP-glucuronate:xylan alpha-glucuronosyltransferase	PF01501(Glycosyl transferase family 8)	PTHR11183:SF1(), PTHR11183(GLYCOGENIN)	KOG1950(Glycosyl transferase, family 8 - glycogenin)			GO:0016757(molecular_function: transferase activity, transferring glycosyl groups)	AT4G33330.1	plant glycogenin-like starch initiation protein 3
Medtr1g019540	chr1	-	5911766	5915169	0.616054	0.669696	0.830274	0.141138	0.069024	0.049765	0.108622	0.051951	0.021301	0.055952	0.050167	0.067166	UDP-glucuronate:xylan alpha-glucuronosyltransferase	PF01501(Glycosyl transferase family 8)	PTHR11183(GLYCOGENIN), PTHR11183:SF1()	KOG1950(Glycosyl transferase, family 8 - glycogenin)			GO:0016757(molecular_function: transferase activity, transferring glycosyl groups)	AT4G33330.1	plant glycogenin-like starch initiation protein 3
Medtr1g019545	chr1	+	5917266	5917881	0.426737	1.00091	0.687869	0.958049	0.47991	0.578712	0.525456	0.605773	0.837629	1.31488	0.904469	1.2873	hypothetical protein
Medtr1g019550	chr1	-	5918200	5924682	1.81828	1.55977	1.6717	1.45464	1.56783	2.04719	1.45539	1.59678	1.31136	1.67295	1.55398	1.51525	disease resistance protein (TIR-NBS-LRR class), putative	PF00560(Leucine Rich Repeat), PF00931(NB-ARC domain)	PTHR11017(LEUCINE-RICH REPEAT-CONTAINING PROTEIN), PTHR11017:SF20(DISEASE RESISTANCE RPP5 LIKE PROTEIN-RELATED)	KOG4658(Apoptotic ATPase)			GO:0005515(molecular_function: protein binding), GO:0043531(molecular_function: ADP binding)	AT4G16890.1	disease resistance protein (TIR-NBS-LRR class), putative
Medtr1g019590	chr1	+	5934153	5934744	0.126162	0.139903	0	1.14122	1.35869	0.567316	3.09061	2.55673	1.23926	1.35345	1.69174	1.56845	EF-hand pair protein
Medtr1g019600	chr1	+	5935922	5936336	0.200338	1.30605	0.957144	0.79852	0.809569	0.505673	0.632103	0.479932	0.786107	0.718757	1.20054	1.03964	EF-hand pair protein							AT4G03290.1	EF hand calcium-binding protein family
Medtr1g019610	chr1	+	5937553	5937846	0.900215	0.748715	0.839977	1.67562	1.22382	0.917044	2.35513	1.50481	2.59369	2.02342	2.96945	2.0395	EF hand protein							AT2G43290.1	Calcium-binding EF-hand family protein
Medtr1g019620	chr1	-	5938193	5941945	11.4376	12.6374	11.3904	10.0453	12.5681	10.7761	10.4789	10.1708	12.6223	15.2408	15.0933	15.4894	cytosolic Fe-S cluster assembly factor NUBP1-like protein	PF02374(Anion-transporting ATPase), PF10609(NUBPL iron-transfer P-loop NTPase)	PTHR23264:SF8(), PTHR23264(NUCLEOTIDE-BINDING PROTEIN NBP35 YEAST -RELATED)	KOG3022(Predicted ATPase, nucleotide-binding)				AT5G50960.1	nucleotide binding protein 35
MT4Noble_000835	chr1	+	5944431	5947673	0	0	0.005404	0.004565	0	0	0	0	0.003371	0	0	0	Stem-specific TSJT1-like protein | PF12481 Aluminium induced protein
Medtr1g019640	chr1	+	5948679	5949279	32.0318	30.2914	29.9919	19.8727	15.8646	24.1798	22.7633	21.239	17.1459	10.9885	20.0617	19.7457	EF hand protein							AT2G43290.1	Calcium-binding EF-hand family protein
Medtr1g019660	chr1	+	5954341	5955225	15.611	11.8968	11.4077	12.0399	13.5291	14.5967	15.2922	12.3694	18.589	4.41514	5.33723	9.03202	EF-hand protein							AT2G43290.1	Calcium-binding EF-hand family protein
Medtr1g019670	chr1	+	5960487	5961036	0.626827	0.299915	0.600685	0.440339	0.562109	0.601926	0.675225	0.251073	0.209644	0.114739	0.257797	0.214582	EF hand protein
Medtr1g019680	chr1	-	5963376	5963796	0	0	0	0	0	0	0	0.103507	0.030583	0	0	0.116588	agenet domain protein	PF05641(Agenet domain)						AT1G06340.1	Plant Tudor-like protein
Medtr1g019715	chr1	+	5979017	5979586	0	0	0	0	0	0	0	0	0	0	0	0	EF-hand pair protein							AT1G73630.1	EF hand calcium-binding protein family
Medtr1g019740	chr1	-	5985758	5992745	9.2766	7.36343	7.59126	7.98508	7.69451	7.20803	5.84751	7.06897	7.45675	15.0283	12.3088	18.9284	phosphatidic acid phosphohydrolase	PF04571(lipin, N-terminal conserved region), PF08235(LNS2 (Lipin/Ned1/Smp2))	PTHR12181:SF4(), PTHR12181(LIPIN)					AT5G42870.1	phosphatidic acid phosphohydrolase 2
Medtr1g019750	chr1	-	5998509	5999666	12.7193	12.3529	11.8448	14.3628	11.3328	13.71	15.4548	20.1875	18.9471	31.96	31.9429	44.0572	BRI1 kinase inhibitor 1, putative							AT5G42750.1	BRI1 kinase inhibitor 1
Medtr1g019760	chr1	-	6004898	6010964	10.717	11.9967	9.45472	8.59068	11.9065	10.1113	7.62891	6.60078	7.61063	11.7898	14.4285	17.6121	catalytic/protein phosphatase type 2C	PF00481(Protein phosphatase 2C)	PTHR13832(PROTEIN PHOSPHATASE 2C), PTHR13832:SF25(PROTEIN PHOSPHATASE 2C 12-RELATED)	KOG0698(Serine/threonine protein phosphatase)			GO:0003824(molecular_function: catalytic activity)	AT1G47380.1	Protein phosphatase 2C family protein
Medtr1g019770	chr1	-	6018832	6022603	0.105238	0.057175	0.41	0.340212	0.302263	0.262155	0.101069	0.13588	0.095147	0.043492	0.100945	0.246678	origin recognition complex second largest subunit 2	PF04084(Origin recognition complex subunit 2 )	PTHR14052(ORIGIN RECOGNITION COMPLEX SUBUNIT 2)			K02604(Cell growth and death: Meiosis - yeast [PATH:ko04113]: ORC2; origin recognition complex subunit 2)	GO:0006260(biological_process: DNA replication), GO:0000808(cellular_component: origin recognition complex), GO:0005634(cellular_component: nucleus)	AT2G37560.1	origin recognition complex second largest subunit 2
Medtr1g019780	chr1	+	6024487	6031917	12.6522	10.4652	8.0295	10.9132	12.2312	12.119	10.4148	10.2908	11.1759	11.0894	12.6492	11.4614	plant/F17M5-140 protein							AT4G33380.1
Medtr1g019783	chr1	-	6026859	6027068	0	0	0.533885	0.035699	0.153681	0.133554	0	0	0.065888	0	0.105247	0.219579	hypothetical protein
Medtr1g019787	chr1	-	6027605	6029613	0.038258	0.221135	0.017311	0.37435	0.135969	0.070231	0.047947	0.153595	0.320419	0.118989	0.050452	0.165572	hypothetical protein
Medtr1g019790	chr1	+	6033275	6033942	5.94697	4.08283	5.11683	3.94891	4.08703	4.36902	5.87776	4.98841	6.07408	3.51968	4.45237	3.64963	hypothetical protein
Medtr1g019800	chr1	+	6036543	6037600	7.71729	5.79301	9.26692	6.13992	6.78692	8.08586	4.26306	7.01209	5.89557	4.64712	4.46427	2.38129	hypothetical protein							AT1G47410.1
Medtr1g019810	chr1	-	6038750	6042433	43.4866	37.9219	38.3167	42.8146	38.1011	34.3825	40.0736	42.4668	38.7848	36.9146	42.3025	38.7856	succinate dehydrogenase							AT1G47420.1	succinate dehydrogenase 5
Medtr1g019825	chr1	-	6048668	6048951	0	0	0	0	0	0	0	0	0	0	0	0	glucose-6-phosphate isomerase, putative							AT4G24620.2	phosphoglucose isomerase 1
Medtr1g019870	chr1	+	6062059	6066368	9.92431	10.128	9.48028	9.94757	9.22142	9.84368	8.82897	10.0876	9.92075	14.5639	13.1462	15.3486	LisH and RanBPM domain protein	PF10607(CTLH/CRA C-terminal to LisH motif domain)	PTHR12864(RAN BINDING PROTEIN 9-RELATED)	KOG2659(LisH motif-containing protein)				AT1G06060.1	LisH and RanBPM domains containing protein
Medtr1g019890	chr1	-	6073554	6074071	0	0	0	0	0	0	0	0	0	0	0.19988	0.115219	hypothetical protein
Medtr1g019900	chr1	-	6076314	6076687	0	0	0	0	0	0	0	0	0	0	0	0.008668	hypothetical protein
Medtr1g019930	chr1	-	6082221	6086387	32.2112	34.6235	32.7677	35.8219	35.6651	32.7194	36.0093	36.2266	40.0772	51.8078	49.8282	64.3203	26S proteasome non-ATPase regulatory subunit-like protein	PF01398(JAB1/Mov34/MPN/PAD-1 ubiquitin protease)	PTHR10410(EUKARYOTIC TRANSLATION INITIATION FACTOR 3 -RELATED), PTHR10410:SF5(26S PROTEASOME NON-ATPASE REGULATORY SUBUNIT 14)	KOG1555(26S proteasome regulatory complex, subunit RPN11)		K03030(Infectious diseases: Epstein-Barr virus infection [PATH:ko05169]: PSMD14, RPN11, POH1; 26S proteasome regulatory subunit N11)	GO:0005515(molecular_function: protein binding)	AT5G23540.1	Mov34/MPN/PAD-1 family protein
Medtr1g019940	chr1	-	6088051	6092381	49.1687	69.59	41.273	40.8295	54.6083	41.6109	33.3592	39.0065	39.2979	62.8104	74.5782	96.5988	patatin-like phospholipase	PF01734(Patatin-like phospholipase)	PTHR10470(), PTHR10470:SF3()				GO:0006629(biological_process: lipid metabolic process)	AT2G26560.1	phospholipase A 2A
Medtr1g019960	chr1	+	6100935	6108582	2.42869	2.85906	3.07865	2.53239	2.26879	2.27835	1.99617	2.2034	2.21829	2.14227	1.94401	2.19215	alpha/beta-hydrolase family-like protein		PTHR22731(RIBONUCLEASES P/MRP PROTEIN SUBUNIT POP1)	KOG2029(Uncharacterized conserved protein)				AT4G34310.1	alpha/beta-Hydrolases superfamily protein
Medtr1g019970	chr1	+	6109405	6113298	22.2211	19.7333	21.1214	26.7528	28.1165	26.59	34.816	30.9977	32.0799	33.9106	31.0703	32.9032	heme oxygenase 1 protein	PF01126(Heme oxygenase)	PTHR10720(HEME OXYGENASE)	KOG4480(Heme oxygenase)			GO:0004392(molecular_function: heme oxygenase (decyclizing) activity), GO:0006788(biological_process: heme oxidation), GO:0055114(biological_process: oxidation-reduction process)	AT2G26550.2	heme oxygenase 2
Medtr1g019990	chr1	+	6116035	6118661	0	0	0	0	0	0	0	0	0	0	0	0	P-loop nucleoside triphosphate hydrolase superfamily protein	PF00685(Sulfotransferase domain)					GO:0008146(molecular_function: sulfotransferase activity)	AT2G15730.1	P-loop containing nucleoside triphosphate hydrolases superfamily protein
Medtr1g020000	chr1	-	6119015	6129165	33.8198	42.2866	35.398	25.3697	27.2983	23.1965	20.7355	21.6699	22.4108	26.8843	27.3183	32.2051	calcineurin-like metallo-phosphoesterase superfamily protein	PF00149(Calcineurin-like phosphoesterase)					GO:0016787(molecular_function: hydrolase activity)	AT4G11800.1	Calcineurin-like metallo-phosphoesterase superfamily protein
Medtr1g020020	chr1	+	6141269	6141981	0	0	0	0	0	0	0	0	0	0.075232	0	0	transmembrane protein, putative
Medtr1g020050	chr1	-	6154174	6154827	0	0	0	0.000856	0	0	0	0	0	0	0	0	transmembrane protein, putative
Medtr1g020070	chr1	-	6162140	6164441	8.75037	9.70674	8.69129	8.62915	8.23119	7.62143	7.97441	9.19348	9.62626	12.4388	8.29008	10.4671	casein kinase II beta chain 2	PF01214(Casein kinase II regulatory subunit)	PTHR11740(CASEIN KINASE II BETA CHAIN)				GO:0019887(molecular_function: protein kinase regulator activity), GO:0005956(cellular_component: protein kinase CK2 complex)	AT4G17640.1	casein kinase II beta chain 2
Medtr1g020080	chr1	+	6171590	6176327	28.25	31.5253	23.1252	35.2664	32.6814	25.39	37.6189	29.8884	30.0222	27.6914	29.4038	22.9989	polyadenylate-binding protein RBP47C	PF00076(RNA recognition motif. (a.k.a. RRM, RBD, or RNP domain))	PTHR24012:SF67(), PTHR24012(FAMILY NOT NAMED)	KOG0131(Splicing factor 3b, subunit 4)			GO:0003676(molecular_function: nucleic acid binding)	AT1G47490.1	RNA-binding protein 47C
Medtr1g020090	chr1	-	6176550	6181167	0.436286	0.474556	0.611572	0.993641	1.16853	0.846343	0.496047	0.881975	1.30762	5.49373	8.2497	24.3457	serine carboxypeptidase-like protein	PF00450(Serine carboxypeptidase)	PTHR11802(SERINE PROTEASE FAMILY S10 SERINE CARBOXYPEPTIDASE), PTHR11802:SF8(LYSOSOMAL PROTECTIVE PROTEIN)	KOG1282(Serine carboxypeptidases (lysosomal cathepsin A))			GO:0004185(molecular_function: serine-type carboxypeptidase activity), GO:0006508(biological_process: proteolysis)	AT3G63470.1	serine carboxypeptidase-like 40
MT4Noble_000877	chr1	+	6179540	6179813	0	0	0	0	0	0	0	0	0	0	0	0.090692
Medtr1g020950	chr1	+	6182637	6182930	0	0	0	0	0	0	0	0	0	0	0	0	transmembrane protein, putative							AT5G05950.1	maternal effect embryo arrest 60
Medtr1g021010	chr1	-	6206412	6211321	0	0	0	0	0	0	0	0	0	0	0	0.044622	serine carboxypeptidase-like protein	PF00450(Serine carboxypeptidase)	PTHR11802(SERINE PROTEASE FAMILY S10 SERINE CARBOXYPEPTIDASE), PTHR11802:SF8(LYSOSOMAL PROTECTIVE PROTEIN)	KOG1282(Serine carboxypeptidases (lysosomal cathepsin A))			GO:0004185(molecular_function: serine-type carboxypeptidase activity), GO:0006508(biological_process: proteolysis)	AT3G63470.1	serine carboxypeptidase-like 40
Medtr1g021020	chr1	-	6214162	6217180	0.023846	0.009368	0	0	0	0	0	0	0	0	0	0.004042	serine carboxypeptidase-like protein	PF00450(Serine carboxypeptidase)	PTHR11802(SERINE PROTEASE FAMILY S10 SERINE CARBOXYPEPTIDASE), PTHR11802:SF8(LYSOSOMAL PROTECTIVE PROTEIN)	KOG1282(Serine carboxypeptidases (lysosomal cathepsin A))			GO:0004185(molecular_function: serine-type carboxypeptidase activity), GO:0006508(biological_process: proteolysis)	AT3G63470.1	serine carboxypeptidase-like 40
Medtr1g021040	chr1	+	6228616	6231597	13.357	9.40536	12.5686	14.1672	13.3298	13.756	17.3308	15.9033	13.8105	14.0287	12.7408	6.86027	transcription factor	PF04784(Protein of unknown function, DUF547)	PTHR23054(UNCHARACTERIZED)					AT5G42690.2	Protein of unknown function, DUF547
MT4Noble_000885	chr1	-	6235821	6236281	0	0	0	0	0	0	0	0	0	0	0	0
Medtr1g021070	chr1	+	6245858	6247497	90.527	80.5443	44.7873	275.532	159.167	232.408	85.239	93.6307	122.743	287.994	265.187	282.197	DUF1645 family protein	PF07816(Protein of unknown function (DUF1645))						AT2G15760.1	Protein of unknown function (DUF1645)
Medtr1g021080	chr1	+	6250091	6256004	3.46629	3.78804	3.23164	2.71978	2.62585	2.54441	2.53862	2.69542	3.03388	3.67323	3.08171	2.62389	organellar single-stranded DNA-binding protein	PF00436(Single-strand binding protein family)					GO:0003697(molecular_function: single-stranded DNA binding)	AT1G47720.1	Primosome PriB/single-strand DNA-binding
Medtr1g021100	chr1	+	6261121	6265384	145.437	129.193	108.852	78.0421	81.9557	87.4202	62.4144	60.0621	66.3736	102.815	95.0729	98.4871	disease resistance protein (CC-NBS-LRR class) family protein	PF05659(Arabidopsis broad-spectrum mildew resistance protein RPW8), PF00931(NB-ARC domain)	PTHR23155(LEUCINE-RICH REPEAT-CONTAINING PROTEIN), PTHR23155:SF282()	KOG4658(Apoptotic ATPase)			GO:0043531(molecular_function: ADP binding)	AT4G33300.1	ADR1-like 1
Medtr1g021110	chr1	+	6269491	6273574	54.5554	68.9883	62.83	42.7675	51.221	48.9308	33.189	36.3662	40.2116	44.9692	46.9498	49.9618	disease resistance protein (CC-NBS-LRR class) family protein	PF00931(NB-ARC domain), PF05659(Arabidopsis broad-spectrum mildew resistance protein RPW8)	PTHR23155(LEUCINE-RICH REPEAT-CONTAINING PROTEIN), PTHR23155:SF282()	KOG4658(Apoptotic ATPase)			GO:0043531(molecular_function: ADP binding)	AT4G33300.1	ADR1-like 1
Medtr1g021120	chr1	-	6277065	6281806	24.3309	29.4488	28.3025	21.3421	25.6793	26.5238	19.4272	17.3909	20.4375	27.6667	33.6684	37.4692	nucleobase-ascorbate transporter-like protein	PF00860(Permease family)	PTHR11119(XANTHINE-URACIL / VITAMIN C PERMEASE FAMILY MEMBER), PTHR11119:SF8()	KOG1292(Xanthine/uracil transporters)			GO:0005215(molecular_function: transporter activity), GO:0006810(biological_process: transport), GO:0055085(biological_process: transmembrane transport), GO:0016020(cellular_component: membrane)	AT2G26510.1	Xanthine/uracil permease family protein
Medtr1g021150	chr1	-	6288645	6293029	161.845	164.168	127.863	159.505	230.753	167.756	176.178	180.271	145.447	222.082	183.254	139.72	ubiquitin-conjugating enzyme E2	PF00179(Ubiquitin-conjugating enzyme)	PTHR24068(FAMILY NOT NAMED)	KOG0417(Ubiquitin-protein ligase)			GO:0016881(molecular_function: acid-amino acid ligase activity)	AT1G64230.4	ubiquitin-conjugating enzyme 28
Medtr1g021180	chr1	-	6297790	6300376	12.7107	12.4837	14.8315	13.4717	15.4438	15.2801	13.6058	15.0497	14.783	15.2677	15.2818	14.4635	signal peptidase I, putative							AT1G47310.1
Medtr1g021210	chr1	+	6308939	6311645	0	0	0	0	0	0	0	0	0	0	0	0	PIF1-like helicase	PF05970(PIF1-like helicase)	PTHR10492(UNCHARACTERIZED)	KOG0987(DNA helicase PIF1/RRM3)			GO:0003678(molecular_function: DNA helicase activity), GO:0000723(biological_process: telomere maintenance), GO:0006281(biological_process: DNA repair)	AT3G51690.1	PIF1 helicase
Medtr1g021220	chr1	-	6317553	6318021	0	0	0	0	0	0	0	0	0	0	0	0	hypothetical protein							AT1G47310.1
Medtr1g021230	chr1	+	6319810	6322818	0.031139	0.021957	0	0.028459	0	0.094802	0	0.027221	0	0.047271	0	0	myb transcription factor	PF00249(Myb-like DNA-binding domain)	PTHR10641:SF30(SUBFAMILY NOT NAMED), PTHR10641(MYB-LIKE DNA-BINDING PROTEIN MYB)				GO:0003682(molecular_function: chromatin binding)	AT4G26930.1	myb domain protein 97
Medtr1g021250	chr1	-	6326399	6327520	0	0	0	0	0	0	0	0	0	0	0	0.065814	pentatricopeptide (PPR) repeat protein	PF01535(PPR repeat)	PTHR24015(FAMILY NOT NAMED)					AT1G12620.1	Pentatricopeptide repeat (PPR) superfamily protein
Medtr1g021270	chr1	+	6335039	6339850	4.09352	4.28592	4.76886	5.44426	5.78336	4.99449	4.98028	5.43698	6.05905	6.65223	5.6753	7.07792	B3 DNA-binding domain protein	PF02362(B3 DNA binding domain)					GO:0003677(molecular_function: DNA binding)	AT3G18990.1	AP2/B3-like transcriptional factor family protein
MT4Noble_000899	chr1	+	6343591	6344859	0.106636	0.045488	0	0.390956	0.143916	0	0	0	0.064392	0.003658	0	0
Medtr1g021280	chr1	-	6344788	6345195	0.325361	0	0	0.358772	0.044215	0	0.123691	0	0.096464	0.172203	0.182712	0.371065	DUF630 family protein	PF04783(Protein of unknown function (DUF630))						AT1G02110.1	Protein of unknown function (DUF630 and DUF632)
MT4Noble_000901	chr1	+	6344864	6345114	0.027576	0	0	0.083446	0	0	0	0	0	0.393501	0.018637	0
Medtr1g021290	chr1	+	6346688	6349314	0.242256	0.155502	0.374797	0.453606	0.39452	0.202731	0.7275	0.37192	0.346504	0.351581	0.333303	0.16998	plant-specific B3-DNA-binding domain protein	PF02362(B3 DNA binding domain)					GO:0003677(molecular_function: DNA binding)	AT4G33280.1	AP2/B3-like transcriptional factor family protein
Medtr1g021295	chr1	+	6349743	6351176	0.105214	0.143252	0.312033	0.227979	0.097762	0.159946	0.345261	0.159312	0.543092	0.195924	0	0.056055	B3 DNA-binding domain protein	PF02362(B3 DNA binding domain)					GO:0003677(molecular_function: DNA binding)	AT5G42700.1	AP2/B3-like transcriptional factor family protein
Medtr1g021310	chr1	+	6354619	6355079	0	0	0	0	0	0	0	0	0	0	0	0	hypothetical protein
Medtr1g021320	chr1	+	6356034	6363567	3.12095	3.16703	2.93935	4.23698	3.84225	3.65448	3.86129	3.55086	4.05735	3.76664	3.46294	4.11477	plant-specific B3-DNA-binding domain protein	PF02362(B3 DNA binding domain)					GO:0003677(molecular_function: DNA binding)	AT4G33280.1	AP2/B3-like transcriptional factor family protein
Medtr1g021330	chr1	+	6366047	6369726	0.334734	0.034362	0.077248	0.10698	0.215588	0.289497	0.164935	0.216596	0.195975	0.0505	0.04924	0.40873	plant-specific B3-DNA-binding domain protein	PF02362(B3 DNA binding domain)					GO:0003677(molecular_function: DNA binding)	AT4G33280.1	AP2/B3-like transcriptional factor family protein
Medtr1g021350	chr1	+	6371866	6374658	0.071079	0.037069	0.105306	0.288054	0.258386	0.203432	0.146081	0.172878	0.14371	0.001363	0.011633	0.052446	plant-specific B3-DNA-binding domain protein	PF02362(B3 DNA binding domain)					GO:0003677(molecular_function: DNA binding)	AT4G33280.1	AP2/B3-like transcriptional factor family protein
Medtr1g021360	chr1	+	6377524	6384232	9.60334	9.04298	9.34354	9.5645	11.1303	10.3034	10.6681	8.21042	9.32103	10.1682	11.5693	9.43365	plant-specific B3-DNA-binding domain protein	PF02362(B3 DNA binding domain)					GO:0003677(molecular_function: DNA binding)	AT4G33280.1	AP2/B3-like transcriptional factor family protein
Medtr1g021380	chr1	+	6390073	6392547	1.11827	2.18379	1.01937	1.53082	1.44851	1.05709	1.01285	1.73625	0.806218	1.30788	1.66616	1.96277	plant-specific B3-DNA-binding domain protein	PF02362(B3 DNA binding domain)					GO:0003677(molecular_function: DNA binding)	AT4G33280.1	AP2/B3-like transcriptional factor family protein
Medtr1g021390	chr1	-	6393395	6393921	0	0	0	0	0	0	0	0	0	0	0	0	hypothetical protein							AT3G57940.1	Domain of unknown function (DUF1726) ;Putative ATPase (DUF699)
Medtr1g021400	chr1	+	6397039	6401195	18.7091	19.6824	17.8617	15.1553	16.4251	15.626	16.3122	15.8251	16.4052	22.8177	20.8089	20.8333	plant-specific B3-DNA-binding domain protein	PF02362(B3 DNA binding domain), PF02178(AT hook motif)					GO:0003677(molecular_function: DNA binding)	AT4G33280.1	AP2/B3-like transcriptional factor family protein
Medtr1g021410	chr1	+	6403159	6405752	7.6313	7.53082	7.5049	6.77345	7.01411	6.51486	6.53689	6.39412	6.13382	7.23037	6.76044	5.94297	plant-specific B3-DNA-binding domain protein	PF02362(B3 DNA binding domain), PF02178(AT hook motif)					GO:0003677(molecular_function: DNA binding)	AT4G33280.1	AP2/B3-like transcriptional factor family protein
MT4Noble_000913	chr1	+	6406673	6406870	0	0	0	0	0	0	0	0	0	0	0	0
Medtr1g021435	chr1	+	6414120	6417233	6.5081	6.84656	6.50033	7.46538	8.16126	6.50233	8.03091	7.4713	8.03499	7.35592	7.3008	6.38019	plant-specific B3-DNA-binding domain protein	PF02362(B3 DNA binding domain)					GO:0003677(molecular_function: DNA binding)	AT4G33280.1	AP2/B3-like transcriptional factor family protein
Medtr1g021440	chr1	+	6419474	6423545	9.08154	9.66159	8.3282	7.77262	7.81097	8.41942	7.77589	8.27491	8.59103	8.25599	7.73871	7.33383	plant-specific B3-DNA-binding domain protein	PF02362(B3 DNA binding domain)					GO:0003677(molecular_function: DNA binding)	AT4G33280.1	AP2/B3-like transcriptional factor family protein
Medtr1g021460	chr1	-	6430026	6430629	0	0	0	0	0	0	0	0	0	0	0.068879	0.038834	hypothetical protein							ATMG00810.1	DNA/RNA polymerases superfamily protein
Medtr1g021470	chr1	+	6430853	6432660	0.066304	0.160321	0.202113	0.111125	0.111225	0.062386	0.103201	0.11473	0.099462	0.139483	0.195359	0.438614	hypothetical protein
Medtr1g021500	chr1	+	6438573	6443179	10.6406	11.2575	10.6736	10.6343	11.0209	10.4396	11.4894	11.7825	11.1205	12.1392	10.6176	12.6467	plant-specific B3-DNA-binding domain protein	PF02362(B3 DNA binding domain)					GO:0003677(molecular_function: DNA binding)	AT4G33280.1	AP2/B3-like transcriptional factor family protein
Medtr1g021510	chr1	+	6443345	6444261	0	0	0	0	0	0.062708	0	0	0	0	0	0	hypothetical protein
Medtr1g021520	chr1	+	6453855	6457812	4.97453	4.94794	4.26869	4.68815	4.21	6.1908	5.15491	6.64532	6.53275	5.17422	5.33615	5.19606	myb-like DNA-binding domain, shaqkyf class protein	PF00249(Myb-like DNA-binding domain)					GO:0003682(molecular_function: chromatin binding)	AT5G42630.1	Homeodomain-like superfamily protein
Medtr1g021540	chr1	-	6465780	6467974	0.093416	0.046607	0.055656	0.04226	0.109877	0	0	0.158552	0	0	0.124799	0.053441	hypothetical protein
Medtr1g021570	chr1	+	6475858	6482290	3.88813	2.28491	2.94904	3.12543	2.81347	3.5416	3.37156	3.68286	3.55419	2.80686	2.01527	2.19883	adenine nucleotide alpha hydrolase-like domain kinase	PF07714(Protein tyrosine kinase)	PTHR24420(), PTHR24420:SF821()	KOG1187(Serine/threonine protein kinase)			GO:0004672(molecular_function: protein kinase activity), GO:0006468(biological_process: protein phosphorylation)	AT3G13690.1	Protein kinase protein with adenine nucleotide alpha hydrolases-like domain
Medtr1g021590	chr1	-	6485061	6486978	0	0	0	0.02328	0	0	0	0	0.027696	0.456544	0.051302	0.265258	transducin/WD40 repeat protein	PF00400(WD domain, G-beta repeat)	PTHR22844(F-BOX AND WD40 DOMAIN PROTEIN)	KOG0266(WD40 repeat-containing protein)			GO:0005515(molecular_function: protein binding)	AT2G26490.1	Transducin/WD40 repeat-like superfamily protein
Medtr1g021610	chr1	-	6496817	6500636	18.3065	30.5749	17.7402	16.8152	25.558	18.8097	9.09594	11.1479	14.0948	17.072	26.0773	31.0351	cysteine-rich receptor-kinase-like protein	PF00069(Protein kinase domain), PF01657(Salt stress response/antifungal)	PTHR24420:SF430(), PTHR24420()	KOG1187(Serine/threonine protein kinase)			GO:0004672(molecular_function: protein kinase activity), GO:0005524(molecular_function: ATP binding), GO:0006468(biological_process: protein phosphorylation)	AT4G21410.1	cysteine-rich RLK (RECEPTOR-like protein kinase) 29
Medtr1g021630	chr1	-	6502386	6507333	0.020195	0	0	0	0.054815	0.052044	0.110308	0	0.045153	0	0.013879	0.007978	cysteine-rich receptor-kinase-like protein	PF01657(Salt stress response/antifungal), PF07714(Protein tyrosine kinase)	PTHR24420:SF430(), PTHR24420()	KOG1187(Serine/threonine protein kinase)			GO:0004672(molecular_function: protein kinase activity), GO:0006468(biological_process: protein phosphorylation)	AT4G21410.1	cysteine-rich RLK (RECEPTOR-like protein kinase) 29
Medtr1g021632	chr1	-	6510010	6513234	0	0.002139	0.000828	0	0.042615	0.003165	0.000343	0.001466	0	0	0.00028	0.00173	cysteine-rich receptor-kinase-like protein	PF07714(Protein tyrosine kinase), PF01657(Salt stress response/antifungal)	PTHR24420:SF430(), PTHR24420()	KOG1187(Serine/threonine protein kinase)			GO:0004672(molecular_function: protein kinase activity), GO:0006468(biological_process: protein phosphorylation)	AT4G21410.1	cysteine-rich RLK (RECEPTOR-like protein kinase) 29
Medtr1g021635	chr1	-	6514070	6517643	0.335515	0.702895	0.501162	0.458952	0.588683	0.594577	0.348032	0.699524	0.767319	1.18633	0.967506	1.6246	cysteine-rich receptor-kinase-like protein	PF07714(Protein tyrosine kinase), PF01657(Salt stress response/antifungal)	PTHR24420:SF430(), PTHR24420()	KOG1187(Serine/threonine protein kinase)			GO:0004672(molecular_function: protein kinase activity), GO:0006468(biological_process: protein phosphorylation)	AT4G21410.1	cysteine-rich RLK (RECEPTOR-like protein kinase) 29
Medtr1g021638	chr1	+	6521275	6522643	17.371	22.9622	16.3009	8.23152	14.0464	11.7233	4.62764	5.03155	6.8715	10.0428	12.9714	16.6237	salt stress response/antifungal domain protein	PF01657(Salt stress response/antifungal)	PTHR11795:SF83(), PTHR11795(UNCHARACTERIZED)					AT4G38830.1	cysteine-rich RLK (RECEPTOR-like protein kinase) 26
Medtr1g021642	chr1	+	6523344	6526374	1.47525	2.73952	0.991983	1.20428	1.75317	1.701	0.500375	0.603286	0.731407	2.82255	2.91659	4.23199	cysteine-rich receptor-kinase-like protein	PF07714(Protein tyrosine kinase), PF01657(Salt stress response/antifungal)	PTHR24420:SF430(), PTHR24420()	KOG1187(Serine/threonine protein kinase)			GO:0004672(molecular_function: protein kinase activity), GO:0006468(biological_process: protein phosphorylation)	AT4G21410.1	cysteine-rich RLK (RECEPTOR-like protein kinase) 29
Medtr1g021652	chr1	-	6532322	6534417	21.2101	19.5547	13.3769	21.4119	23.2533	21.3911	13.4216	13.5792	13.8131	24.589	28.1073	26.6676	cytochrome P450 family fatty acid hydroperoxide lyase	PF00067(Cytochrome P450)			4.2.1.92(Hydroperoxide dehydratase.)	K01723(Enzyme families: Cytochrome P450 [BR:ko00199]: AOS; hydroperoxide dehydratase)	GO:0005506(molecular_function: iron ion binding), GO:0016705(molecular_function: oxidoreductase activity, acting on paired donors, with incorporation or reduction of molecular oxygen), GO:0020037(molecular_function: heme binding), GO:0055114(biological_process: oxidation-reduction process)	AT5G42650.1	allene oxide synthase
Medtr1g021680	chr1	-	6543295	6557770	25.1632	26.2773	25.7842	20.2693	23.0379	21.8125	20.5701	18.743	22.5717	26.9817	24.6722	26.118	exocyst complex component SEC3B	PF09763(Exocyst complex component Sec3)	PTHR16092:SF13(), PTHR16092(SEC3/SYNTAXIN-RELATED)	KOG2148(Exocyst protein Sec3)				AT1G47550.1	exocyst complex component sec3A
Medtr1g021670	chr1	-	6571054	6574863	5.29505	4.4685	4.55647	5.26889	4.76381	5.70635	4.03557	4.45262	5.95098	6.20589	6.40401	5.27232	plant/MJB21-3 protein	PF04765(Protein of unknown function (DUF616))	PTHR12956:SF11(), PTHR12956(ALKALINE CERAMIDASE-RELATED)					AT5G42660.1	Protein of unknown function (DUF616)
Medtr1g021760	chr1	-	6580128	6582496	118.508	109.04	133.973	170.09	142.637	147.947	197.251	208.324	178.46	123.418	115.209	108.529	30S ribosomal protein S9P	PF00380(Ribosomal protein S9/S16)	PTHR21569(RIBOSOMAL PROTEIN S9)	KOG1697(Mitochondrial/chloroplast ribosomal protein S9)		K02996(Translation: Ribosome [BR:ko03011]: RP-S9, MRPS9, rpsI; small subunit ribosomal protein S9)	GO:0003735(molecular_function: structural constituent of ribosome), GO:0006412(biological_process: translation), GO:0005840(cellular_component: ribosome)	AT1G74970.1	ribosomal protein S9
Medtr1g021740	chr1	-	6584225	6589072	3.17039	3.78978	2.83753	7.89407	7.24266	6.55552	11.6916	10.4575	9.24353	17.2536	20.0081	15.8087	MATE efflux family protein	PF01554(MatE)	PTHR11206:SF46(), PTHR11206(MULTIDRUG RESISTANCE PROTEIN)	KOG1347(Uncharacterized membrane protein, predicted efflux pump)			GO:0015238(molecular_function: drug transmembrane transporter activity), GO:0015297(molecular_function: antiporter activity), GO:0006855(biological_process: drug transmembrane transport), GO:0055085(biological_process: transmembrane transport), GO:0016020(cellular_component: membrane)	AT1G47530.1	MATE efflux family protein
Medtr1g021820	chr1	-	6590938	6594604	0.558023	0.521626	0.636529	0.415831	0.309989	0.430747	0.428111	0.40309	0.373401	0.814373	1.15149	1.30483	F-box/FBD-like domain protein	PF00646(F-box domain)					GO:0005515(molecular_function: protein binding)	AT1G13570.1	F-box/RNI-like superfamily protein
Medtr1g021825	chr1	-	6598972	6603580	3.87186	3.37432	4.01012	4.29122	4.27396	4.5424	4.38907	3.55734	4.33786	4.81423	6.01083	7.70074	ubiquitin-protein ligase, putative	PF00646(F-box domain), PF07723(Leucine Rich Repeat)					GO:0005515(molecular_function: protein binding)	AT1G13570.1	F-box/RNI-like superfamily protein
MT4Noble_000943	chr1	-	6599211	6599497	4.08917	3.69938	2.64499	4.23881	3.00319	5.56845	3.84506	3.69033	3.82986	3.46101	6.23173	9.15398
Medtr1g021730	chr1	+	6608134	6612099	0.133306	0.155703	0.12987	0.405833	0.285787	0.237251	0.147697	0.183152	0.04607	0.993346	6.58847	16.2044	inositol polyphosphate 5-phosphatase I	PF03372(Endonuclease/Exonuclease/phosphatase family)	PTHR11200:SF17(), PTHR11200(INOSITOL 5-PHOSPHATASE)	KOG0565(Inositol polyphosphate 5-phosphatase and related proteins)				AT1G47510.1	inositol polyphosphate 5-phosphatase 11
Medtr1g021835	chr1	+	6616869	6621939	4.82419	6.71336	6.00404	5.69704	6.72107	5.1055	5.04523	4.22466	5.83151	7.61818	7.70272	7.77681	zinc ion-binding protein	PF12315(Protein of unknown function (DUF3633)), PF00412(LIM domain)	PTHR24209(FAMILY NOT NAMED)				GO:0008270(molecular_function: zinc ion binding)	AT1G19270.1	DA1
Medtr1g021845	chr1	-	6622354	6624391	0	0	0	0	0	0	0	0	0	0	0	0	LysM-domain receptor-like kinase	PF00069(Protein kinase domain), PF01476(LysM domain)	PTHR24420(), PTHR24420:SF481()	KOG1187(Serine/threonine protein kinase)			GO:0004672(molecular_function: protein kinase activity), GO:0005524(molecular_function: ATP binding), GO:0006468(biological_process: protein phosphorylation), GO:0016998(biological_process: cell wall macromolecule catabolic process)	AT2G23770.1	protein kinase family protein / peptidoglycan-binding LysM domain-containing protein
Medtr1g021855	chr1	-	6634648	6636284	3.44911	4.32253	5.88708	1.48659	1.75112	1.59601	1.29593	1.36027	1.44601	0.293752	0.438337	0.196095	CAZy family GT8 glycosyltransferase	PF01501(Glycosyl transferase family 8)	PTHR13778(GLYCOSYLTRANSFERASE 8 DOMAIN-CONTAINING PROTEIN)				GO:0016757(molecular_function: transferase activity, transferring glycosyl groups)	AT3G50760.1	galacturonosyltransferase-like 2
Medtr1g021875	chr1	-	6646734	6649638	0.607933	0.712818	0.986243	0.720617	0.38446	0.750506	0.834335	0.536535	0.872891	1.15969	0.678703	0.608979	hypothetical protein							AT3G21290.1	dentin sialophosphoprotein-related
Medtr1g021885	chr1	-	6650369	6651857	0.255172	0.779676	0.592947	0.631173	0.171993	0.356946	0.275141	0.64255	0.926956	0.98544	0.011018	0.439956	glutamate dehydrogenase (NADP+)							AT1G51720.1	Amino acid dehydrogenase family protein
Medtr1g021895	chr1	-	6658324	6660432	23.0995	25.0075	24.6205	26.4883	29.2303	24.07	23.1644	22.6494	28.0559	31.7234	28.9319	19.9844	zinc finger, C3HC4 type (RING finger) protein	PF00097(Zinc finger, C3HC4 type (RING finger))	PTHR12313(RNF5)	KOG0823(Predicted E3 ubiquitin ligase)			GO:0046872(molecular_function: metal ion binding)	AT1G19310.1	RING/U-box superfamily protein
Medtr1g021915	chr1	+	6664666	6665884	1.72419	3.23888	1.02561	1.64146	2.88509	2.87207	0.821219	0.752564	0.737286	1.89003	3.36602	1.73885	GNS1/SUR4 membrane family protein	PF01151(GNS1/SUR4 family)	PTHR11157(FATTY ACID ACYL TRANSFERASE-RELATED), PTHR11157:SF3()				GO:0016021(cellular_component: integral component of membrane)	AT4G36830.1	GNS1/SUR4 membrane protein family
Medtr1g021925	chr1	+	6671115	6675091	17.8779	24.7911	18.2984	19.2068	21.1548	15.4998	12.5358	12.3258	14.7368	19.9899	18.2876	15.3669	phospholipid/glycerol acyltransferase family protein	PF01553(Acyltransferase)	PTHR10983:SF10(), PTHR10983(1-ACYLGLYCEROL-3-PHOSPHATE ACYLTRANSFERASE-RELATED)	KOG1505(Lysophosphatidic acid acyltransferase LPAAT and related acyltransferases)	2.3.1.-(), 2.3.1.51(1-acylglycerol-3-phosphate O-acyltransferase.)	K13513(Lipid metabolism: Lipid biosynthesis proteins [BR:ko01004]: LCLAT1, AGPAT8; lysocardiolipin and lysophospholipid acyltransferase)	GO:0016746(molecular_function: transferase activity, transferring acyl groups), GO:0008152(biological_process: metabolic process)	AT1G75020.1	lysophosphatidyl acyltransferase 4
Medtr1g021945	chr1	+	6678557	6679394	0	0	0	0	0	0	0	0	0	0	0	0	pathogenesis-related thaumatin family protein	PF00314(Thaumatin family)						AT1G75030.1	thaumatin-like protein 3
Medtr1g021950	chr1	-	6680255	6688043	1.66747	1.84589	1.74502	1.48215	1.45308	1.20379	0.941867	0.996388	0.857091	1.01744	1.24727	1.12478	metalloendopeptidase/zinc ion-binding protein	PF01457(Leishmanolysin), PF07974(EGF-like domain)	PTHR10942(LEISHMANOLYSIN-LIKE PEPTIDASE)	KOG2556(Leishmanolysin-like peptidase (Peptidase M8 family))			GO:0004222(molecular_function: metalloendopeptidase activity), GO:0006508(biological_process: proteolysis), GO:0007155(biological_process: cell adhesion), GO:0016020(cellular_component: membrane)	AT5G42620.2	metalloendopeptidases;zinc ion binding
Medtr1g021955	chr1	-	6698130	6701849	0.99399	0.816208	1.44395	2.30247	1.2129	1.20601	0.858144	1.74736	1.94088	0.480585	1.12041	0.786253	PPR containing plant-like protein	PF04678(Mitochondrial calcium uniporter)	PTHR13462(FAMILY NOT NAMED), PTHR13462:SF4(SUBFAMILY NOT NAMED)	KOG2966(Uncharacterized conserved protein)				AT2G23790.1	Protein of unknown function (DUF607)
Medtr1g021965	chr1	+	6715727	6716811	0	0	0	0.019252	0.082438	0	0	0	0	0	0	0	hypothetical protein
Medtr1g021970	chr1	-	6719261	6722115	35.5906	28.6883	34.6878	30.4096	30.8576	37.6515	36.7094	29.4388	27.349	14.595	13.7508	10.5007	histone deacetylase complex subunit SAP30 Sin3-binding protein		PTHR13286:SF4(), PTHR13286(SAP30)					AT1G19330.2
Medtr1g021985	chr1	+	6727334	6731532	3.84792	3.31665	3.90074	4.47626	4.63554	4.49077	4.54232	4.88961	4.87846	4.9335	4.76985	6.01637	methyltransferase-like protein	PF05063(MT-A70 )	PTHR14475(), PTHR14475:SF2()	KOG2356(Transcriptional activator, adenine-specific DNA methyltransferase)			GO:0008168(molecular_function: methyltransferase activity), GO:0006139(biological_process: nucleobase-containing compound metabolic process)	AT1G19340.1	Methyltransferase MT-A70 family protein
Medtr1g021990	chr1	+	6733314	6734684	0	0	0.002211	0	0.037293	0.154842	0.0498	0.166183	0	0.071521	0.010489	0	brassinazole-resistant 1 protein	PF05687(BES1/BZR1 plant transcription factor, N-terminal)						AT1G75080.1	Brassinosteroid signalling positive regulator (BZR1) family protein
Medtr1g021995	chr1	+	6736189	6737364	3.60227	4.12287	4.49227	5.43333	3.78813	4.19034	3.0548	3.22698	3.57927	5.07053	6.10136	7.2689	peroxisomal biogenesis factor 11 family protein	PF05648(Peroxisomal biogenesis factor 11 (PEX11))	PTHR12652(PEROXISOMAL BIOGENESIS FACTOR 11)	KOG4186(Peroxisomal biogenesis protein (peroxin))			GO:0016559(biological_process: peroxisome fission), GO:0005779(cellular_component: integral component of peroxisomal membrane)	AT1G47750.1	peroxin 11A
MT4Noble_000962	chr1	+	6740825	6741037	0	0.06037	0.220487	0.015113	0	0.009484	0	0	0.111876	0	0	0
Medtr1g022005	chr1	+	6743471	6750493	0.457946	0.309683	0.563006	0.414996	0.366969	0.449268	0.180228	0.220444	0.176459	0.275869	0.238665	0.286454	phospholipid/glycerol acyltransferase family protein	PF01553(Acyltransferase)	PTHR23063(ACETYLTRANSFERASE-RELATED)	KOG4666(Predicted phosphate acyltransferase, contains PlsC domain)	2.3.1.23(1-acylglycerophosphocholine O-acyltransferase.), 2.3.1.67(1-alkylglycerophosphocholine O-acetyltransferase.)	K13510(Lipid metabolism: Lipid biosynthesis proteins [BR:ko01004]: LPCAT1_2; lysophosphatidylcholine acyltransferase / lyso-PAF acetyltransferase)	GO:0016746(molecular_function: transferase activity, transferring acyl groups), GO:0008152(biological_process: metabolic process)	AT1G80950.1	Phospholipid/glycerol acyltransferase family protein
Medtr1g022010	chr1	+	6755214	6759848	0	0	0.010783	0	0	0.009018	0.008895	0.045801	0.004125	0	0	0	histidine-tRNA ligase		PTHR11476(HISTIDYL-TRNA SYNTHETASE)					AT3G02760.1	Class II aaRS and biotin synthetases superfamily protein
Medtr1g022015	chr1	-	6760070	6763220	4.3909	3.92735	5.63592	3.38046	4.68022	3.56956	4.67373	3.80613	2.63087	1.52951	1.61752	0.986345	PPPDE thiol peptidase family protein, putative	PF05903(PPPDE putative peptidase domain)	PTHR12378(UNCHARACTERIZED)	KOG0324(Uncharacterized conserved protein)				AT1G47740.1	PPPDE putative thiol peptidase family protein
Medtr1g022025	chr1	-	6772802	6775724	31.3944	30.0018	25.6745	26.3435	27.1382	29.5141	25.3992	22.5457	25.4109	29.4866	30.4142	33.3538	nucleotide-diphospho-sugar transferase family protein	PF03407(Nucleotide-diphospho-sugar transferase)	PTHR10994:SF3(ARABINOSYLTRANSFERASE), PTHR10994(RETICULON)					AT1G19360.1	Nucleotide-diphospho-sugar transferase family protein
Medtr1g022030	chr1	-	6777081	6782301	17.7626	18.5523	18.1854	18.7737	19.8378	18.4095	19.3368	19.1463	19.1046	19.2203	20.1527	20.1866	protein phosphatase 2C family protein	PF07228(Stage II sporulation protein E (SpoIIE))	PTHR12320(PROTEIN PHOSPHATASE 2C)	KOG1379(Serine/threonine protein phosphatase)			GO:0003824(molecular_function: catalytic activity)	AT4G16580.1	Protein phosphatase 2C family protein
Medtr1g022040	chr1	-	6789887	6793507	3.61165	3.62594	3.16964	2.19154	1.94711	2.7567	1.95297	2.44775	2.5802	3.19279	2.32911	1.91021	cytochrome P450 family 709 protein	PF00067(Cytochrome P450)	PTHR24282:SF174(), PTHR24282(CYTOCHROME P450 FAMILY MEMBER)	KOG0157(Cytochrome P450 CYP4/CYP19/CYP26 subfamilies)			GO:0005506(molecular_function: iron ion binding), GO:0016705(molecular_function: oxidoreductase activity, acting on paired donors, with incorporation or reduction of molecular oxygen), GO:0020037(molecular_function: heme binding), GO:0055114(biological_process: oxidation-reduction process)	AT1G75130.1	cytochrome P450, family 721, subfamily A, polypeptide 1
Medtr1g022045	chr1	-	6794973	6796922	5.31167	5.98486	5.63871	5.53991	5.42358	5.01373	5.1733	5.5528	4.93968	7.33785	6.78719	6.11912	plant/F18O14-17 protein							AT1G75140.1
Medtr1g022050	chr1	-	6798978	6801188	44.4391	46.374	42.3552	44.0498	41.6351	35.673	45.7976	43.2286	40.4022	51.9364	45.0251	46.0532	outer envelope pore protein 24B							AT1G45170.1
Medtr1g022060	chr1	-	6805180	6807510	0	0	0	0	0	0	0	0.020362	0	0	0	0	DUF594 family protein	PF04578(Protein of unknown function, DUF594)						AT5G45540.1	Protein of unknown function (DUF594)
Medtr1g022065	chr1	+	6819656	6820093	0	0.047036	0	0	0	0	0	0	0	0	0	0	transmembrane protein, putative
Medtr1g022070	chr1	+	6820710	6822779	0	0	0	0.000982	0	0	0	0	0	0.003658	0	0	NB-ARC domain disease resistance protein	PF00931(NB-ARC domain)	PTHR23155(LEUCINE-RICH REPEAT-CONTAINING PROTEIN), PTHR23155:SF121()				GO:0043531(molecular_function: ADP binding)	AT3G07040.1	NB-ARC domain-containing disease resistance protein
Medtr1g022075	chr1	+	6824723	6827788	1.09307	1.83848	1.22691	0.913963	1.14529	1.07052	0.666244	0.600774	0.99443	1.96795	1.85113	2.57861	DUF620 family protein	PF04788(Protein of unknown function (DUF620))						AT1G75160.1	Protein of unknown function (DUF620)
Medtr1g022080	chr1	+	6828684	6829619	1.42503	1.21595	1.2249	0.617279	0.336763	0.582537	1.0721	0.490354	0.54544	0.983488	2.71725	2.50256	hypothetical protein
Medtr1g022105	chr1	-	6840265	6841493	0	0.030964	0	0	0	0	0	0	0	0.130251	0.246065	0.080199	F-box protein	PF00646(F-box domain)					GO:0005515(molecular_function: protein binding)	AT2G15640.1	F-box family protein
Medtr1g022115	chr1	+	6846781	6847441	5.76765	5.47587	5.3735	8.06499	7.23981	6.56528	7.79107	6.69514	7.52306	6.97377	6.65033	6.29583	transmembrane protein, putative
Medtr1g022125	chr1	+	6852265	6854072	0.881155	1.20317	0.246071	2.45722	2.34626	1.56243	1.3029	1.59982	1.16901	1.04054	0.316247	1.55823	DNA-directed RNA polymerase	PF04563(RNA polymerase beta subunit)	PTHR20856:SF8(DNA-DIRECTED RNA POLYMERASE III SUBUNIT RPC2), PTHR20856(DNA-DIRECTED RNA POLYMERASE I SUBUNIT 2)				GO:0003677(molecular_function: DNA binding), GO:0003899(molecular_function: DNA-directed RNA polymerase activity), GO:0006351(biological_process: transcription, DNA-templated)	AT5G45140.1	nuclear RNA polymerase C2
Medtr1g022135	chr1	+	6865496	6872581	1.34624	1.58201	1.34632	3.49473	3.04213	1.57002	1.98937	2.46237	3.70933	3.4297	3.17426	3.46796	DNA-directed RNA polymerase	PF04563(RNA polymerase beta subunit), PF04560(RNA polymerase Rpb2, domain 7), PF04561(RNA polymerase Rpb2, domain 2)	PTHR20856:SF8(DNA-DIRECTED RNA POLYMERASE III SUBUNIT RPC2), PTHR20856(DNA-DIRECTED RNA POLYMERASE I SUBUNIT 2)				GO:0003677(molecular_function: DNA binding), GO:0003899(molecular_function: DNA-directed RNA polymerase activity), GO:0006351(biological_process: transcription, DNA-templated)	AT5G45140.1	nuclear RNA polymerase C2
Medtr1g022145	chr1	-	6873459	6882296	31.1046	37.9627	32.2945	21.5916	24.0628	22.0152	21.2543	21.2912	22.1922	23.9299	22.0698	20.8013	GYF domain protein	PF02213(GYF domain)	PTHR14445(GRB10 INTERACTING GYF PROTEIN), PTHR14445:SF24()				GO:0005515(molecular_function: protein binding)	AT5G42950.1	GYF domain-containing protein
Medtr1g022150	chr1	-	6884866	6887607	0	0.002417	0	0	0	0	0	0	0	0	0	0	like-COV protein	PF04367(Protein of unknown function (DUF502))						AT2G18460.1	like COV 3
MT4Noble_000982	chr1	-	6890697	6891791	0.928749	1.19943	0.532331	0.370721	0.414647	0.356003	0.350793	0.370934	0.083069	0.254085	0.484235	0.585685
Medtr1g022160	chr1	-	6892247	6896988	17.5602	18.666	15.7803	7.93961	10.121	10.0635	6.47581	4.97239	6.24677	6.9197	7.94457	9.18066	glucan endo-1,3-beta-glucosidase-like protein	PF00332(Glycosyl hydrolases family 17)	PTHR16631(FAMILY NOT NAMED)				GO:0004553(molecular_function: hydrolase activity, hydrolyzing O-glycosyl compounds), GO:0005975(biological_process: carbohydrate metabolic process)	AT5G42720.1	Glycosyl hydrolase family 17 protein
Medtr1g022165	chr1	+	6899906	6903127	118	121.776	103.053	171.347	164.873	137.385	207.906	187.354	161.674	130.347	136.471	122.067	60S ribosomal L13-like protein	PF01294(Ribosomal protein L13e)	PTHR11722(60S RIBOSOMAL PROTEIN L13)	KOG3295(60S Ribosomal protein L13)			GO:0003735(molecular_function: structural constituent of ribosome), GO:0006412(biological_process: translation), GO:0005622(cellular_component: intracellular), GO:0005840(cellular_component: ribosome)	AT3G49010.1	breast basic conserved 1
MT4Noble_000985	chr1	+	6905191	6910575	22.6287	21.2648	19.7238	18.678	20.4766	18.1719	19.0945	20.6767	25.1198	25.9852	22.5248	25.3221
MT4Noble_000986	chr1	+	6923850	6926561	10.4686	10.3706	12.8029	8.53178	13.3326	8.851	9.34565	12.6052	12.4333	13.5918	8.21051	9.71877
Medtr1g022185	chr1	+	6931531	6934612	45.5371	35.3978	32.3629	23.0271	21.3488	25.0919	28.3881	32.9757	29.6948	37.9159	35.9183	31.0351	Sec14p-like phosphatidylinositol transfer family protein	PF03765(CRAL/TRIO, N-terminal domain), PF00650(CRAL/TRIO domain)	PTHR10174(RETINALDEHYDE BINDING PROTEIN-RELATED), PTHR10174:SF78()	KOG1470(Phosphatidylinositol transfer protein PDR16 and related proteins)				AT1G75170.1	Sec14p-like phosphatidylinositol transfer family protein
Medtr1g022190	chr1	-	6934779	6938822	0.860666	1.08786	1.69539	1.22887	0.575111	1.21405	1.37737	1.78375	1.22867	1.41301	1.7475	0.860637	erythronate-4-phosphate dehydrogenase family protein							AT1G75180.1	Erythronate-4-phosphate dehydrogenase family protein
Medtr1g022200	chr1	+	6943417	6944598	0	0	0	0.025693	0.041726	0.016335	0.128509	0	0	0.087025	0.047539	0	F-box protein interaction domain protein							AT3G23880.1	F-box and associated interaction domains-containing protein
Medtr1g022210	chr1	-	6946961	6948821	0.002349	0	0	0	0	0	0	0	0	0	0	0	transmembrane protein, putative
Medtr1g022215	chr1	+	6949627	6949899	0	0	0	0	0	0	0	0	0	0	0	0	hypothetical protein
Medtr1g022225	chr1	-	6955942	6957574	7.8962	8.97556	7.22621	12.2637	11.5942	10.0472	12.8928	10.9346	11.3987	10.6578	11.0516	8.85332	tRNA wybutosine-synthesizing-like protein	PF04055(Radical SAM superfamily), PF08608(Wyosine base formation)	PTHR13930(RSAFD1-RELATED)				GO:0003824(molecular_function: catalytic activity), GO:0051536(molecular_function: iron-sulfur cluster binding)	AT1G75200.1	flavodoxin family protein / radical SAM domain-containing protein
Medtr1g022235	chr1	+	6960192	6963496	8.02913	6.60913	6.44099	8.25777	8.23312	7.38971	8.26367	7.79189	9.40544	8.76423	8.94477	7.09658	flavodoxin family protein	PF00258(Flavodoxin)	PTHR13930(RSAFD1-RELATED)				GO:0010181(molecular_function: FMN binding), GO:0016491(molecular_function: oxidoreductase activity)	AT1G75200.1	flavodoxin family protein / radical SAM domain-containing protein
Medtr1g022245	chr1	+	6967614	6969410	3.70275	5.03719	2.9762	1.38372	2.02131	2.53787	2.0731	1.45911	1.80475	1.4348	2.31382	1.67241	P-loop nucleoside triphosphate hydrolase superfamily protein	PF00004(ATPase family associated with various cellular activities (AAA))	PTHR23070(BCS1 AAA-TYPE ATPASE), PTHR23070:SF1()	KOG0743(AAA+-type ATPase)			GO:0005524(molecular_function: ATP binding)	AT3G28510.1	P-loop containing nucleoside triphosphate hydrolases superfamily protein
Medtr1g022250	chr1	+	6970364	6972206	3.1587	3.43658	2.98173	0.476132	1.28065	1.06211	0.661178	0.724014	0.707801	0.266283	0.365459	0.314673	P-loop nucleoside triphosphate hydrolase superfamily protein	PF00004(ATPase family associated with various cellular activities (AAA))	PTHR23070(BCS1 AAA-TYPE ATPASE), PTHR23070:SF1()	KOG0743(AAA+-type ATPase)			GO:0005524(molecular_function: ATP binding)	AT5G40010.1	AAA-ATPase 1
Medtr1g022255	chr1	-	6972814	6978281	19.3637	16.791	18.6204	15.1846	15.3549	13.935	16.4197	16.7205	15.141	18.6522	18.2908	14.5722	methyltransferase PMT16, putative	PF03141(Putative S-adenosyl-L-methionine-dependent methyltransferase)	PTHR10108(METHYLTRANSFERASE), PTHR10108:SF37(METHYLTRANSFERASE PMT6-RELATED)				GO:0008168(molecular_function: methyltransferase activity)	AT1G19430.1	S-adenosyl-L-methionine-dependent methyltransferases superfamily protein
Medtr1g022260	chr1	+	6980742	6989435	1.23274	1.71355	1.98594	2.29594	1.90693	2.2318	2.11376	2.28768	2.19805	1.0039	1.53847	1.3436	cytosolic purine 5-nucleotidase	PF05761(5' nucleotidase family)	PTHR12103:SF1(), PTHR12103(CYTOSOLIC PURINE 5-NUCLEOTIDASE-RELATED)	KOG2469(IMP-GMP specific 5'-nucleotidase)				AT1G75210.1	HAD-superfamily hydrolase, subfamily IG, 5\'-nucleotidase
MT4Noble_000998	chr1	+	6984040	6984264	0.344878	1.22628	0.549891	0.547792	0.121369	0.429699	0.640678	0.215116	0.537745	0.651635	0.045785	0.179861	Cytosolic purine 5-nucleotidase | PF05761 5' nucleotidase family
Medtr1g022265	chr1	-	6989516	6994668	112.475	128.61	99.4872	75.9929	87.4944	89.4224	53.7396	58.4529	68.1444	119.53	117.914	119.333	LRR receptor-like kinase family protein	PF07714(Protein tyrosine kinase)	PTHR24420(), PTHR24420:SF797()	KOG1187(Serine/threonine protein kinase)			GO:0004672(molecular_function: protein kinase activity), GO:0006468(biological_process: protein phosphorylation)	AT2G16250.1	Leucine-rich repeat protein kinase family protein
Medtr1g022275	chr1	-	7007058	7008205	0.32276	0.315559	0.11991	0.033205	0	0.065189	0.096733	0.11921	0.094547	0.047642	0.145372	0.125838	C2 domain protein	PF00168(C2 domain)					GO:0005515(molecular_function: protein binding)	AT5G23950.1	Calcium-dependent lipid-binding (CaLB domain) family protein
Medtr1g022290	chr1	+	7023184	7024154	12.0503	10.8277	15.4471	8.86503	4.40607	7.03658	7.83943	12.5252	15.0679	11.0521	6.83497	5.14451	MYB family transcription factor	PF00249(Myb-like DNA-binding domain)	PTHR25040(), PTHR25040:SF162()				GO:0003682(molecular_function: chromatin binding)	AT4G39250.1	RAD-like 1
Medtr1g022295	chr1	+	7027641	7033412	11.9932	9.96106	10.3666	14.6775	13.1972	11.2429	14.774	16.7961	15.4766	13.5045	11.2913	13.0836	Maf DDB-G0281937-like protein	PF02545(Maf-like protein)					GO:0005737(cellular_component: cytoplasm)	AT5G42770.2	Maf-like protein
Medtr1g022300	chr1	+	7034160	7034374	5.64642	7.10227	6.49722	7.90442	8.82321	8.60481	3.31538	7.39785	10.7231	12.8409	10.3303	14.4922	hypothetical protein
Medtr1g022305	chr1	-	7035027	7041752	26.6073	23.3226	23.1814	34.0053	33.6059	28.1203	20.52	26.5786	33.3628	41.2409	37.5872	46.6331	DEAD-box ATP-dependent RNA helicase-like protein	PF00271(Helicase conserved C-terminal domain), PF00270(DEAD/DEAH box helicase)	PTHR24031(RNA HELICASE), PTHR24031:SF11(PROTEIN MUT-14-RELATED)	KOG0330(ATP-dependent RNA helicase)			GO:0003676(molecular_function: nucleic acid binding), GO:0005524(molecular_function: ATP binding), GO:0008026(molecular_function: ATP-dependent helicase activity), GO:0004386(molecular_function: helicase activity)	AT5G60990.1	DEA(D/H)-box RNA helicase family protein
Medtr1g022310	chr1	-	7043756	7043935	0	0	0	0	0	0	0	0	0	0	0	0	Nodule Cysteine-Rich (NCR) secreted peptide	PF07127(Late nodulin protein)					GO:0046872(molecular_function: metal ion binding), GO:0009878(biological_process: nodule morphogenesis)
Medtr1g022315	chr1	-	7044035	7048221	0.337428	0.392889	0.182922	0.429077	0.321076	0.1988	0.233866	0.180208	0.242627	0.090504	0.139262	0.25899	sugar porter (SP) family MFS transporter	PF00083(Sugar (and other) transporter)	PTHR24063(), PTHR24063:SF74()	KOG0254(Predicted transporter (major facilitator superfamily))			GO:0022857(molecular_function: transmembrane transporter activity), GO:0055085(biological_process: transmembrane transport), GO:0016021(cellular_component: integral component of membrane)	AT1G75220.1	Major facilitator superfamily protein
MT4Noble_001008	chr1	-	7048174	7048269	0	0	0	0	0	0.023979	0.127518	0	0.13292	0	0.035119	0
Medtr1g022325	chr1	-	7055156	7056841	0	0.027524	0.089961	0.025379	0	0.027114	0.066338	0	0	0	0	0.063867	4-hydroxyphenylpyruvate dioxygenase	PF00903(Glyoxalase/Bleomycin resistance protein/Dioxygenase superfamily)	PTHR11959(4-HYDROXYPHENYLPYRUVATE DIOXYGENASE)	KOG0638(4-hydroxyphenylpyruvate dioxygenase)	1.13.11.27(4-hydroxyphenylpyruvate dioxygenase.)	K00457(Transport and catabolism: Exosome [BR:ko04147]: HPD, hppD; 4-hydroxyphenylpyruvate dioxygenase)		AT1G06570.1	phytoene desaturation 1
Medtr1g022345	chr1	+	7068528	7074782	30.3941	32.5286	31.141	29.4208	31.044	31.7736	26.4036	26.0211	27.8897	24.8492	22.9105	20.6076	FACT complex subunit SSRP1	PF00505(HMG (high mobility group) box), PF03531(Structure-specific recognition protein (SSRP1))	PTHR13711(SWI/SNF-RELATED CHROMATIN BINDING PROTEIN), PTHR13711:SF59()	KOG0526(Nucleosome-binding factor SPN, POB3 subunit)		K09272(Transcription: Transcription factors [BR:ko03000]: SSRP1; structure-specific recognition protein 1)		AT3G28730.1	high mobility group
Medtr1g022350	chr1	+	7076378	7077932	36.3067	42.0161	29.4872	26.105	34.8847	33.2269	15.5211	17.8861	19.752	17.3774	17.5569	19.0839	ubiquitin-protein ligase, putative							AT4G36550.1	ARM repeat superfamily protein
Medtr1g022355	chr1	+	7079848	7081020	7.37961	7.83316	7.44976	6.47393	8.52094	6.52897	8.23985	8.8152	8.3622	7.58015	6.91999	5.83093	nuclear fusion defective protein, putative							AT1G19520.1	pentatricopeptide (PPR) repeat-containing protein
Medtr1g022360	chr1	+	7083959	7084997	7.75509	6.71829	7.77285	8.1817	8.48239	8.04042	8.67688	8.85625	8.6887	6.90569	7.2237	6.9459	nuclear fusion defective-like protein	PF01535(PPR repeat)	PTHR24015(FAMILY NOT NAMED), PTHR24015:SF19()					AT1G19520.1	pentatricopeptide (PPR) repeat-containing protein
Medtr1g022365	chr1	+	7086221	7088202	0.031461	0.124734	0.122088	0.057378	0.0491	0.042523	0.056533	0	0.04623	0	0.055945	0.072887	hypothetical protein							AT1G75260.1	oxidoreductases, acting on NADH or NADPH
Medtr1g022370	chr1	-	7088247	7091159	1.58452	0.808492	1.7958	0.741791	0.537744	0.622281	0.811609	0.930979	0.617472	0.169161	0.166316	0.055834	tubby-F-box-like protein	PF01167(Tub family), PF00646(F-box domain)	PTHR16517:SF7(PROTEIN KING TUBBY), PTHR16517(TUBBY-RELATED)	KOG2502(Tub family proteins)			GO:0005515(molecular_function: protein binding)	AT1G47270.1	tubby like protein 6
Medtr1g022375	chr1	-	7095436	7096779	1.06499	3.82115	0.870106	3.21062	4.75971	4.3391	0.942701	2.30756	1.80706	1.69691	2.04184	3.25129	60S ribosomal protein L7, putative		PTHR11524(60S RIBOSOMAL PROTEIN L7)					AT2G44120.2	Ribosomal protein L30/L7 family protein
MT4Noble_001019	chr1	-	7096529	7097406	0.282304	0.540172	0.353157	0.363179	0.675598	0.498536	0.418871	0.723945	0.41762	0.376233	0.926498	1.10294	60S ribosomal protein L7, putative
Medtr1g022380	chr1	-	7097988	7101114	0.487887	0.491785	0.460428	0.842807	0.943743	0.982452	0.72165	0.932368	0.928236	1.03886	1.33646	1.19553	disease resistance protein RGA4	PF00931(NB-ARC domain)	PTHR23155(LEUCINE-RICH REPEAT-CONTAINING PROTEIN)	KOG4658(Apoptotic ATPase)			GO:0043531(molecular_function: ADP binding)	AT3G14470.1	NB-ARC domain-containing disease resistance protein
MT4Noble_001021	chr1	-	7103521	7103783	0	0	0	0	0	0	0.126726	0	0	0	0	0.085288
Medtr1g022385	chr1	-	7105236	7108698	92.0114	98.8258	83.4734	126.497	113.445	98.4166	129.768	130.133	108.661	91.0179	101.59	84.6497	thaliana 60S ribosomal protein L7	PF08079(Ribosomal L30 N-terminal domain), PF00327(Ribosomal protein L30p/L7e)	PTHR11524(60S RIBOSOMAL PROTEIN L7)	KOG3184(60S ribosomal protein L7)		K02937(Translation: Ribosome [BR:ko03011]: RP-L7e, RPL7; large subunit ribosomal protein L7e)		AT3G13580.1	Ribosomal protein L30/L7 family protein
Medtr1g022395	chr1	+	7115914	7117531	7.63487	8.05519	13.0865	19.6361	27.51	15.1724	18.4062	18.4976	25.3979	14.799	12.9517	11.1351	hypothetical protein							AT1G19530.1
Medtr1g022400	chr1	-	7118221	7120844	6.25957	5.32851	5.39354	6.60604	6.42558	6.78967	7.50729	7.88482	6.95088	6.31132	6.62111	6.23277	PPR containing plant protein	PF01535(PPR repeat)	PTHR24015(FAMILY NOT NAMED), PTHR24015:SF75(SUBFAMILY NOT NAMED)					AT5G09450.1	Tetratricopeptide repeat (TPR)-like superfamily protein
Medtr1g022405	chr1	+	7122386	7127664	18.0805	17.3606	18.1471	16.1524	15.6519	18.9259	17.3353	16.936	18.2976	15.25	15.3901	14.3767	gamma carbonic anhydrase-like protein		PTHR22572:SF47(), PTHR22572(SUGAR-1-PHOSPHATE GUANYL TRANSFERASE)	KOG3121(Dynactin, subunit p25)				AT1G19580.1	gamma carbonic anhydrase 1
Medtr1g022410	chr1	-	7130131	7134211	71.6408	72.0479	70.3973	69.9345	70.7718	60.3525	70.9412	65.5269	65.7268	86.958	86.7399	84.4944	20S proteasome subunit alpha type 1	PF00227(Proteasome subunit), PF10584(Proteasome subunit A N-terminal signature)	PTHR11599(PROTEASOME SUBUNIT ALPHA/BETA), PTHR11599:SF12(PROTEASOME SUBUNIT ALPHA TYPE-1)	KOG0863(20S proteasome, regulatory subunit alpha type PSMA1/PRE5)	3.4.25.1(Proteasome endopeptidase complex.)	K02725(Transport and catabolism: Exosome [BR:ko04147]: PSMA1; 20S proteasome subunit alpha 6)	GO:0004298(molecular_function: threonine-type endopeptidase activity), GO:0051603(biological_process: proteolysis involved in cellular protein catabolic process), GO:0005839(cellular_component: proteasome core complex), GO:0004175(molecular_function: endopeptidase activity), GO:0006511(biological_process: ubiquitin-dependent protein catabolic process), GO:0019773(cellular_component: proteasome co…	AT1G47250.1	20S proteasome alpha subunit F2
Medtr1g022415	chr1	+	7135987	7142594	10.4289	11.6782	11.7601	7.52836	9.02296	7.89074	4.47868	5.40345	7.64342	8.11609	6.78988	7.79544	auxilin-like protein	PF00226(DnaJ domain)	PTHR23172:SF31(), PTHR23172(AUXILIN/CYCLIN G-ASSOCIATED KINASE-RELATED)	KOG0431(Auxilin-like protein and related proteins containing DnaJ domain)				AT1G75310.1	auxin-like 1 protein
Medtr1g022420	chr1	-	7142631	7148060	0	0	0	0	0	0	0	0.023333	0	0	0	0	ornithine carbamoyltransferase	PF00185(Aspartate/ornithine carbamoyltransferase, Asp/Orn binding domain), PF02729(Aspartate/ornithine carbamoyltransferase, carbamoyl-P binding domain)	PTHR11405:SF1(ORNITHINE CARBAMOYLTRANSFERASE, MITOCHONDRIAL), PTHR11405(CARBAMOYLTRANSFERASE RELATED)	KOG1504(Ornithine carbamoyltransferase OTC/ARG3)	2.1.3.3(Ornithine carbamoyltransferase.)	K00611(Amino acid metabolism: Arginine biosynthesis [PATH:ko00220]: OTC, argF, argI; ornithine carbamoyltransferase)	GO:0016597(molecular_function: amino acid binding), GO:0016743(molecular_function: carboxyl- or carbamoyltransferase activity), GO:0006520(biological_process: cellular amino acid metabolic process)	AT1G75330.1	ornithine carbamoyltransferase
Medtr1g022440	chr1	-	7156476	7160614	1.49342	1.97263	2.0579	2.32808	1.52561	2.26	2.45573	2.90528	1.88649	2.52977	8.41325	33.4476	dihydroflavonol 4-reductase-like protein	PF01370(NAD dependent epimerase/dehydratase family)	PTHR10366(NAD DEPENDENT EPIMERASE/DEHYDRATASE), PTHR10366:SF9()	KOG1502(Flavonol reductase/cinnamoyl-CoA reductase)	1.1.1.219(Dihydrokaempferol 4-reductase.), 1.1.1.234(Flavanone 4-reductase.)	K13082(Biosynthesis of other secondary metabolites: Flavonoid biosynthesis [PATH:ko00941]: DFR; bifunctional dihydroflavonol 4-reductase/flavanone 4-reductase)	GO:0003824(molecular_function: catalytic activity), GO:0050662(molecular_function: coenzyme binding), GO:0044237(biological_process: cellular metabolic process)	AT5G42800.1	dihydroflavonol 4-reductase
Medtr1g022445	chr1	-	7164068	7167077	2.90076	4.94991	4.0175	4.30323	4.05936	4.18724	4.75423	4.68902	3.15134	2.53578	4.57022	2.71857	dihydroflavonol 4-reductase	PF01370(NAD dependent epimerase/dehydratase family)	PTHR10366(NAD DEPENDENT EPIMERASE/DEHYDRATASE), PTHR10366:SF9()	KOG1502(Flavonol reductase/cinnamoyl-CoA reductase)	1.1.1.219(Dihydrokaempferol 4-reductase.), 1.1.1.234(Flavanone 4-reductase.)	K13082(Biosynthesis of other secondary metabolites: Flavonoid biosynthesis [PATH:ko00941]: DFR; bifunctional dihydroflavonol 4-reductase/flavanone 4-reductase)	GO:0003824(molecular_function: catalytic activity), GO:0050662(molecular_function: coenzyme binding), GO:0044237(biological_process: cellular metabolic process)	AT5G42800.1	dihydroflavonol 4-reductase
Medtr1g022450	chr1	+	7172657	7173650	111.757	96.0091	107.626	175.576	147.636	160.931	212.609	236.404	202.414	153.174	164.877	135.88	50S ribosomal protein L31	PF01197(Ribosomal protein L31)					GO:0003735(molecular_function: structural constituent of ribosome), GO:0006412(biological_process: translation), GO:0005622(cellular_component: intracellular), GO:0005840(cellular_component: ribosome)	AT1G75350.1	Ribosomal protein L31
Medtr1g022455	chr1	-	7175766	7179889	1.95396	2.48034	1.84682	0.569898	1.26983	1.46687	2.25244	0.855293	0.647931	2.34247	2.0614	1.71422	salicylic acid carboxyl methyltransferase	PF03492(SAM dependent carboxyl methyltransferase)			2.1.1.141(Jasmonate O-methyltransferase.)	K08241(Lipid metabolism: alpha-Linolenic acid metabolism [PATH:ko00592]: E2.1.1.141; jasmonate O-methyltransferase)	GO:0008168(molecular_function: methyltransferase activity)	AT1G19640.1	jasmonic acid carboxyl methyltransferase
Medtr1g022465	chr1	-	7187442	7193328	3.92801	4.35124	2.38611	2.9331	3.55713	3.01189	3.19085	4.35698	3.88213	15.3532	12.6153	15.2098	salicylic acid carboxyl methyltransferase	PF03492(SAM dependent carboxyl methyltransferase)			2.1.1.141(Jasmonate O-methyltransferase.)	K08241(Lipid metabolism: alpha-Linolenic acid metabolism [PATH:ko00592]: E2.1.1.141; jasmonate O-methyltransferase)	GO:0008168(molecular_function: methyltransferase activity)	AT1G19640.1	jasmonic acid carboxyl methyltransferase
MT4Noble_001035	chr1	+	7198063	7198999	0	0	0	0	0	0	0	0	0	0	0	0	Cytochrome b6/F complex subunit VIII
Medtr1g022475	chr1	+	7199985	7203994	11.2005	10.842	11.4594	11.447	12.826	12.2767	10.8112	10.8306	12.8089	13.4069	13.7339	12.01	inositol-pentakisphosphate 2-kinase-like protein	PF06090(Inositol-pentakisphosphate 2-kinase)	PTHR14456(INOSITOL POLYPHOSPHATE KINASE 1), PTHR14456:SF6()	KOG4749(Inositol polyphosphate kinase)			GO:0005524(molecular_function: ATP binding), GO:0035299(molecular_function: inositol pentakisphosphate 2-kinase activity)	AT1G22100.1	Inositol-pentakisphosphate 2-kinase family protein
Medtr1g022480	chr1	-	7206595	7212071	54.1871	61.2566	56.7253	47.4816	45.9685	45.7966	32.9837	35.4367	43.1386	54.37	48.5343	59.5834	Sec14p-like phosphatidylinositol transfer family protein	PF03765(CRAL/TRIO, N-terminal domain), PF00650(CRAL/TRIO domain)	PTHR23324(SEC14 RELATED PROTEIN), PTHR23324:SF5()	KOG1471(Phosphatidylinositol transfer protein SEC14 and related proteins)				AT2G21520.1	Sec14p-like phosphatidylinositol transfer family protein
Medtr1g022485	chr1	-	7215469	7218807	74.1593	68.6793	66.8723	107.07	105.468	114.798	95.8659	109.592	134.36	164.276	154.619	218.028	nuclease in basal defense response protein	PF02151(UvrB/uvrC motif), PF02577(Bifunctional nuclease)					GO:0005515(molecular_function: protein binding), GO:0004518(molecular_function: nuclease activity)	AT1G75380.1	bifunctional nuclease in basal defense response 1
Medtr1g022495	chr1	+	7234780	7236202	3.05286	3.03421	2.46575	1.61702	1.94684	2.12444	1.90358	2.08971	2.15775	2.96346	4.15831	4.14245	BZIP transcription factor bZIP124	PF00170(bZIP transcription factor)	PTHR22952:SF60(), PTHR22952(CAMP-RESPONSE ELEMENT BINDING PROTEIN-RELATED)				GO:0003700(molecular_function: sequence-specific DNA binding transcription factor activity), GO:0043565(molecular_function: sequence-specific DNA binding), GO:0006355(biological_process: regulation of transcription, DNA-templated)	AT1G75390.1	basic leucine-zipper 44
Medtr1g022500	chr1	-	7238044	7238287	2.92787	3.9705	5.19157	1.10986	1.33424	0.922176	0.49118	0.705409	0.907251	1.31667	1.47877	0.485679	transmembrane protein, putative
Medtr1g022505	chr1	+	7243845	7247867	11.4578	13.5153	14.3538	8.50782	10.2682	11.8867	9.88744	8.20637	9.51989	12.6285	13.2971	12.9707	C3HC4-type RING zinc finger protein	PF00097(Zinc finger, C3HC4 type (RING finger))					GO:0046872(molecular_function: metal ion binding)	AT1G75400.1	RING/U-box superfamily protein
Medtr1g022940	chr1	-	7248613	7253109	3.50389	2.57635	2.1002	4.51625	5.11304	4.34925	4.90367	4.18769	6.24393	6.12915	6.67157	7.15242	NAD-dependent epimerase/dehydratase family protein	PF01370(NAD dependent epimerase/dehydratase family)	PTHR10366:SF120(), PTHR10366(NAD DEPENDENT EPIMERASE/DEHYDRATASE)				GO:0003824(molecular_function: catalytic activity), GO:0050662(molecular_function: coenzyme binding), GO:0044237(biological_process: cellular metabolic process)	AT1G19690.1	NAD(P)-binding Rossmann-fold superfamily protein
Medtr1g022950	chr1	+	7253562	7256936	1.22872	0.480925	0.816286	0.472531	0.429325	0.944412	0.281369	0.554701	0.376889	0.446328	0.583236	0.09578	TRAM, LAG1 and CLN8 (TLC) lipid-sensing domain protein	PF03798(TLC domain)		KOG4474(Uncharacterized conserved protein)			GO:0016021(cellular_component: integral component of membrane)	AT1G35180.1	TRAM, LAG1 and CLN8 (TLC) lipid-sensing domain containing protein
Medtr1g022960	chr1	-	7257247	7263623	18.0022	16.3609	13.7198	24.9769	22.1921	20.7111	22.7685	21.3668	19.4096	21.3745	20.6902	17.2056	nucleotide-binding; protein-binding protein	PF00400(WD domain, G-beta repeat), PF04158(Sof1-like domain )	PTHR22851(U3 SMALL NUCLEOLAR RNA U3 SNORNA ASSOCIATED PROTEIN)	KOG0268(Sof1-like rRNA processing protein (contains WD40 repeats))		K11806(Folding, sorting and degradation: Ubiquitin system [BR:ko04121]: WDSOF1; WD repeat and SOF domain-containing protein 1)	GO:0005515(molecular_function: protein binding)	AT4G28450.1	nucleotide binding;protein binding
Medtr1g022970	chr1	-	7264537	7266778	0.039278	0.077339	0.122923	0.05511	0.062586	0.079899	0.0194	0	0	0	0.050964	0.06097	peroxidase family protein	PF00141(Peroxidase)			1.11.1.7(Peroxidase.)	K00430(Biosynthesis of other secondary metabolites: Phenylpropanoid biosynthesis [PATH:ko00940]: E1.11.1.7; peroxidase)	GO:0004601(molecular_function: peroxidase activity), GO:0020037(molecular_function: heme binding), GO:0006979(biological_process: response to oxidative stress), GO:0055114(biological_process: oxidation-reduction process)	AT1G44970.1	Peroxidase superfamily protein
Medtr1g022980	chr1	-	7268870	7275413	49.9229	50.2925	45.3691	68.7538	70.6769	66.6888	58.9198	67.3382	78.9085	81.0777	82.5638	93.4573	GTP-binding protein HflX	PF01926(50S ribosome-binding GTPase)	PTHR10229(GTP-BINDING PROTEIN HFLX)	KOG0410(Predicted GTP binding protein)		K03665(Translation: Ribosome biogenesis [BR:ko03009]: hflX; GTPase)	GO:0005525(molecular_function: GTP binding)	AT5G57960.1	GTP-binding protein, HflX
Medtr1g022990	chr1	+	7277214	7277369	0	0	0	0	0	0	0	0	0	0	0	0	hypothetical protein
Medtr1g023000	chr1	-	7278985	7280350	210.655	230.216	188.789	282.423	270.157	242.355	316.69	290.363	254.598	259.039	253.678	214.264	40S ribosomal S3-like protein	PF00189(Ribosomal protein S3, C-terminal domain), PF07650(KH domain)	PTHR11760(30S/40S RIBOSOMAL PROTEIN S3)	KOG3181(40S ribosomal protein S3)		K02985(Translation: Ribosome [BR:ko03011]: RP-S3e, RPS3; small subunit ribosomal protein S3e)	GO:0003735(molecular_function: structural constituent of ribosome), GO:0006412(biological_process: translation), GO:0005840(cellular_component: ribosome), GO:0003723(molecular_function: RNA binding)	AT5G35530.1	Ribosomal protein S3 family protein
Medtr1g023020	chr1	-	7285309	7287747	0	0	0	0	0	0.007154	0	0	0	0	0	0	lectin-like receptor kinase family protein, putative		PTHR24420(), PTHR24420:SF435()					AT2G37710.1	receptor lectin kinase
Medtr1g023030	chr1	+	7288470	7290630	2.01977	2.18909	1.69635	2.30152	1.80254	2.15526	3.04098	2.95738	2.50884	1.79002	0.927761	1.49553	peptide N-acetyl-beta-D-glucosaminyl asparaginase amidase A	PF12222(Peptide N-acetyl-beta-D-glucosaminyl asparaginase amidase A)						AT3G14920.1	Peptide-N4-(N-acetyl-beta-glucosaminyl)asparagine amidase A protein
Medtr1g023035	chr1	+	7292229	7294186	0.095539	0.085199	0.098681	0.116941	0.174547	0.142304	0.117324	0.053625	0.092573	0.174795	0.228533	0.019351	peptide N-acetyl-beta-D-glucosaminyl asparaginase amidase A	PF12222(Peptide N-acetyl-beta-D-glucosaminyl asparaginase amidase A)						AT3G14920.1	Peptide-N4-(N-acetyl-beta-glucosaminyl)asparagine amidase A protein
Medtr1g023050	chr1	-	7300327	7304717	8.62509	8.88905	8.58174	7.98538	8.38315	8.88399	6.78493	7.1429	7.59373	11.6673	12.6107	12.238	BEL1-related homeotic protein	PF07526(Associated with HOX), PF00046(Homeobox domain)	PTHR11850:SF14(), PTHR11850(HOMEOBOX PROTEIN TRANSCRIPTION FACTORS)	KOG0773(Transcription factor MEIS1 and related HOX domain proteins)			GO:0003700(molecular_function: sequence-specific DNA binding transcription factor activity), GO:0043565(molecular_function: sequence-specific DNA binding), GO:0006355(biological_process: regulation of transcription, DNA-templated)	AT2G16400.1	BEL1-like homeodomain 7
Medtr1g023070	chr1	-	7312768	7318006	1.57111	1.25235	1.24476	3.0216	3.08946	2.70501	1.57555	2.36501	1.3341	2.60799	3.33237	2.71619	DEAD-box ATP-dependent RNA helicase, putative	PF00271(Helicase conserved C-terminal domain)	PTHR24031(RNA HELICASE), PTHR24031:SF11(PROTEIN MUT-14-RELATED)				GO:0003676(molecular_function: nucleic acid binding), GO:0004386(molecular_function: helicase activity), GO:0005524(molecular_function: ATP binding)	AT5G60990.1	DEA(D/H)-box RNA helicase family protein
Medtr1g023120	chr1	+	7344114	7348518	1.73649	1.50209	3.32873	1.29072	1.09983	1.56614	1.2869	1.64607	0.642709	0.881275	1.4437	1.05197	beta-like galactosidase	PF01301(Glycosyl hydrolases family 35)	PTHR23421:SF33(), PTHR23421(BETA-GALACTOSIDASE RELATED)	KOG0496(Beta-galactosidase)			GO:0004553(molecular_function: hydrolase activity, hydrolyzing O-glycosyl compounds), GO:0005975(biological_process: carbohydrate metabolic process)	AT1G45130.1	beta-galactosidase 5
Medtr1g023125	chr1	-	7349145	7349564	7.38474	5.9511	6.056	4.84913	5.99318	6.71838	4.27568	6.29297	5.18211	6.77295	8.86993	10.6264	hypothetical protein
MT4Noble_001061	chr1	+	7349397	7349707	0.253837	0	0.473619	0.102385	0	0.560752	0	0	0	0	0.155644	1.09565
Medtr1g023140	chr1	-	7352554	7354715	162.309	178.597	201.692	131.856	102.651	141.217	88.6062	110.954	91.2961	152.776	145.126	139.457	thioredoxin H-type 1 protein	PF00085(Thioredoxin)	PTHR10438(THIOREDOXIN)	KOG0907(Thioredoxin)			GO:0045454(biological_process: cell redox homeostasis)	AT3G51030.1	thioredoxin H-type 1
Medtr1g023160	chr1	+	7356764	7361982	16.2425	13.4431	14.5217	20.4642	18.5315	19.3076	20.4805	19.9739	22.2954	17.6986	17.9874	18.6866	GTP-binding protein Obg2, putative	PF01018(GTP1/OBG), PF01926(50S ribosome-binding GTPase)	PTHR11702(DEVELOPMENTALLY REGULATED GTP-BINDING PROTEIN-RELATED), PTHR11702:SF3(GTP-BINDING PROTEIN 10)	KOG1489(Predicted GTP-binding protein (ODN superfamily))			GO:0005525(molecular_function: GTP binding)	AT5G18570.1	GTP1/OBG family protein
Medtr1g023170	chr1	+	7364200	7365369	0.24113	0.144413	0.164434	0.086122	0.190682	0.055049	0.096089	0.129657	0.002759	0	0	0.041341	AP2 domain class transcription factor	PF00847(AP2 domain)					GO:0003700(molecular_function: sequence-specific DNA binding transcription factor activity), GO:0006355(biological_process: regulation of transcription, DNA-templated)	AT1G75490.1	Integrase-type DNA-binding superfamily protein
Medtr1g023180	chr1	-	7367315	7370532	0.378694	0.282184	1.49853	0.856683	0.240585	0.682424	0.565395	1.02381	0.652079	0.416607	0.429312	0.171945	auxin-induced 5NG4-like protein	PF00892(EamA-like transporter family)					GO:0016020(cellular_component: membrane)	AT1G75500.1	Walls Are Thin 1
Medtr1g023190	chr1	+	7387028	7392697	9.78818	9.67877	8.30514	9.4254	9.37264	9.05742	10.5184	9.08513	8.85012	10.4987	9.81768	9.71531	eukaryotic translation initiation factor 3 subunit C	PF05470(Eukaryotic translation initiation factor 3 subunit 8 N-terminus), PF01399(PCI domain)	PTHR13937(EUKARYOTIC TRANSLATION INITATION FACTOR 3, SUBUNIT 8 EIF3S8 -RELATED)	KOG1076(Translation initiation factor 3, subunit c (eIF-3c))		K03252(Translation: Translation factors [BR:ko03012]: EIF3C; translation initiation factor 3 subunit C)	GO:0005515(molecular_function: protein binding), GO:0003743(molecular_function: translation initiation factor activity), GO:0031369(molecular_function: translation initiation factor binding), GO:0006413(biological_process: translational initiation), GO:0005852(cellular_component: eukaryotic translation initiation factor 3 complex)	AT3G56150.1	eukaryotic translation initiation factor 3C
Medtr1g023210	chr1	+	7398040	7401108	1740.9	1571.91	1413.43	1676.13	1757.71	1675.46	1632.88	1642.64	1851.79	3178.3	2889.55	3249.15	papain family cysteine protease	PF00112(Papain family cysteine protease), PF08246(Cathepsin propeptide inhibitor domain (I29))	PTHR12411:SF42(), PTHR12411(CYSTEINE PROTEASE FAMILY C1-RELATED)	KOG1542(Cysteine proteinase Cathepsin F)			GO:0008234(molecular_function: cysteine-type peptidase activity), GO:0006508(biological_process: proteolysis)	AT4G39090.1	Papain family cysteine protease
Medtr1g023230	chr1	-	7417436	7419015	0	0	0	0	0	0	0	0	0.042005	0	0	0	zinc finger, LRP1 type protein	PF05142(Domain of unknown function (DUF702) )						AT1G19790.1	SHI-related sequence 7
Medtr1g023260	chr1	+	7448740	7450656	14.1303	12.0047	12.9179	17.7795	20.5425	18.0443	15.1853	16.9634	21.9855	27.0419	23.8859	26.9902	salt tolerance-like protein	PF00643(B-box zinc finger)					GO:0008270(molecular_function: zinc ion binding), GO:0005622(cellular_component: intracellular)	AT1G75540.1	salt tolerance homolog2
Medtr1g023270	chr1	-	7452377	7453407	0.04032	0	0.02413	0.098719	0.106429	0	0	0.044846	0	0	0	0	Novel GRP family							AT1G75550.1	glycine-rich protein
Medtr1g023310	chr1	-	7455380	7461179	22.3327	21.4805	23.8319	32.1004	31.7653	30.0111	33.603	33.267	31.9783	27.8359	31.0707	29.9715	protein accumulation AND replication OFs protein							AT5G42480.1	Chaperone DnaJ-domain superfamily protein
Medtr1g023330	chr1	+	7463620	7467489	5.46824	5.87887	4.96741	7.4281	8.28963	6.32823	7.05878	7.515	8.20746	8.01353	7.52971	6.70946	mediator of RNA polymerase II transcription subunit 11	PF10280(Mediator complex protein )					GO:0001104(molecular_function: RNA polymerase II transcription cofactor activity), GO:0006357(biological_process: regulation of transcription from RNA polymerase II promoter), GO:0016592(cellular_component: mediator complex)	AT3G01435.1	Expressed protein
Medtr1g023340	chr1	-	7468759	7473033	14.9059	16.4717	15.2219	19.1049	20.1717	17.9544	16.2148	15.4841	17.399	29.1229	32.1067	40.6072	alpha/beta fold hydrolase	PF00561(alpha/beta hydrolase fold)	PTHR10992:SF56(METHYLESTERASE 4-RELATED), PTHR10992(ALPHA/BETA HYDROLASE FOLD-CONTAINING PROTEIN)	KOG4409(Predicted hydrolase/acyltransferase (alpha/beta hydrolase superfamily))				AT4G24160.1	alpha/beta-Hydrolases superfamily protein
Medtr1g023370	chr1	+	7479056	7480611	0	0	0	0	0	0	0	0	0	0	0	0	DUF223 domain protein	PF02721(Domain of unknown function DUF223)		KOG0851(Single-stranded DNA-binding replication protein A (RPA), large (70 kD) subunit and related ssDNA-binding proteins)				AT1G52950.1	Nucleic acid-binding, OB-fold-like protein
Medtr1g023400	chr1	-	7487490	7488551	0	0	0	0	0	0	0	0	0	0	0	0	F-box protein interaction domain protein							AT3G23880.1	F-box and associated interaction domains-containing protein
Medtr1g023460	chr1	-	7502126	7502776	0	0	0	0	0	0	0	0	0	0	0	0	NYN domain protein	PF01936(NYN domain)						AT3G62210.1	Putative endonuclease or glycosyl hydrolase
Medtr1g023470	chr1	-	7505849	7507514	0	0	0	0.009262	0	0	0	0	0	0	0	0.04192	hypothetical protein
Medtr1g023500	chr1	+	7523400	7533496	22.2592	22.7432	23.6896	18.184	20.2295	18.8299	16.9946	17.7696	19.9263	19.5158	17.421	18.0123	DNA-directed RNA polymerase subunit beta	PF04567(RNA polymerase Rpb2, domain 5), PF04561(RNA polymerase Rpb2, domain 2), PF04565(RNA polymerase Rpb2, domain 3), PF04566(RNA polymerase Rpb2, domain 4), PF04563(RNA polymerase beta subunit), PF04560(RNA polymerase Rpb2, domain 7), PF00562(RNA polymerase Rpb2, domain 6)	PTHR20856:SF7(DNA-DIRECTED RNA POLYMERASE II SUBUNIT RPB2), PTHR20856(DNA-DIRECTED RNA POLYMERASE I SUBUNIT 2)	KOG0214(RNA polymerase II, second largest subunit)	2.7.7.6(DNA-directed RNA polymerase.)	K03010(Infectious diseases: Epstein-Barr virus infection [PATH:ko05169]: RPB2, POLR2B; DNA-directed RNA polymerase II subunit RPB2)	GO:0003677(molecular_function: DNA binding), GO:0003899(molecular_function: DNA-directed RNA polymerase activity), GO:0006351(biological_process: transcription, DNA-templated)	AT4G21710.1	DNA-directed RNA polymerase family protein
Medtr1g023505	chr1	+	7536272	7536786	0.968698	1.39887	1.29886	1.39103	1.63046	1.6571	1.69896	1.58698	1.15769	2.6254	2.50175	1.51161	hypothetical protein
MT4Noble_001088	chr1	-	7536360	7536832	9.54954	8.12017	7.07613	9.78796	9.01034	8.99969	7.65984	8.02749	10.8139	11.2286	10.3693	10.3419
Medtr1g023510	chr1	-	7537822	7546911	9.29455	9.8501	9.83765	8.28014	9.19186	9.3203	7.19235	8.38875	9.28388	9.32266	8.96084	10.1541	polyamine oxidase	PF04433(SWIRM domain), PF01593(Flavin containing amine oxidoreductase)	PTHR10742:SF30(), PTHR10742(AMINE OXIDASE)	KOG0029(Amine oxidase)			GO:0016491(molecular_function: oxidoreductase activity), GO:0055114(biological_process: oxidation-reduction process), GO:0005515(molecular_function: protein binding)	AT4G16310.1	LSD1-like 3
Medtr1g023530	chr1	-	7554246	7555650	0.030119	0.022994	0	0	0.061324	0.029811	0	0	0	0	0.034428	0.095374	F-box/LRR protein, putative		PTHR23125()	KOG1947(Leucine rich repeat proteins, some proteins contain F-box)				AT1G80630.1	RNI-like superfamily protein
Medtr1g023570	chr1	+	7569461	7571765	0.067155	0.570512	0.279668	0.312834	0.978743	0.664338	0.240942	0.492502	0.248303	6.0723	23.9994	87.3258	glyoxal oxidase amine-terminal protein	PF09118(Domain of unknown function (DUF1929)), PF07250(Glyoxal oxidase N-terminus)						AT1G75620.1	glyoxal oxidase-related protein
Medtr1g023590	chr1	+	7574582	7578394	37.7094	40.9263	36.9457	55.9976	51.5076	44.7275	61.1671	58.3275	57.5123	47.9346	48.3303	48.9905	60S ribosomal protein L13a-4	PF00572(Ribosomal protein L13)	PTHR11545:SF3(60S RIBOSOMAL PROTEIN L13A), PTHR11545(RIBOSOMAL PROTEIN L13)	KOG3204(60S ribosomal protein L13a)			GO:0003735(molecular_function: structural constituent of ribosome), GO:0006412(biological_process: translation), GO:0005840(cellular_component: ribosome)	AT5G48760.1	Ribosomal protein L13 family protein
Medtr1g023600	chr1	+	7580177	7584416	0.231993	0.195284	0.125342	0.465842	0.319837	0.287175	0.233233	0.372854	0.460437	0.607826	0.513028	0.835852	disease resistance protein RGA4	PF00931(NB-ARC domain)	PTHR23155(LEUCINE-RICH REPEAT-CONTAINING PROTEIN)	KOG4658(Apoptotic ATPase)			GO:0043531(molecular_function: ADP binding)	AT3G14470.1	NB-ARC domain-containing disease resistance protein
Medtr1g023605	chr1	+	7584791	7585835	0.446494	1.05573	0.78722	1.0216	0.943023	0.698809	0.538265	1.30206	1.36604	0.499594	1.26495	2.62222	hypothetical protein
Medtr1g023610	chr1	-	7589577	7590345	0.029771	0	0	0	0	0	0	0	0.002429	0	0	0	P-loop nucleoside triphosphate hydrolase superfamily protein							AT3G19960.1	myosin 1
Medtr1g023620	chr1	+	7591057	7591855	0	0	0	0	0	0	0	0	0	0	0	0	hypothetical protein		PTHR11618:SF13(TRANSCRIPTION INITIATION FACTOR IIB), PTHR11618(TRANSCRIPTION INITIATION FACTOR IIB-RELATED)					AT3G10330.1	Cyclin-like family protein
Medtr1g023630	chr1	-	7593841	7595115	149.425	140.244	120.691	199.718	200.124	202.992	176.881	186.062	200.138	207.926	196.483	283.96	core histone H2A/H2B/H3/H4	PF00125(Core histone H2A/H2B/H3/H4)	PTHR11426(HISTONE H3)				GO:0003677(molecular_function: DNA binding)	AT4G40030.2	Histone superfamily protein
Medtr1g023660	chr1	+	7599725	7603391	21.2321	21.6868	22.0243	22.4096	23.6816	22.8535	21.7641	22.1941	20.6679	29.8029	27.0198	24.0342	GAGA-binding transcriptional activator BBR/BPC6-like protein	PF06217(GAGA binding protein-like family)						AT5G42520.1	basic pentacysteine 6
Medtr1g023690	chr1	+	7618001	7621776	16.1413	17.2477	19.1007	17.7661	19.1845	16.7303	18.3385	16.3968	16.3356	19.4659	19.905	22.8315	BZIP transcription factor	PF00170(bZIP transcription factor)	PTHR13301:SF13(), PTHR13301(X-BOX TRANSCRIPTION FACTOR-RELATED)				GO:0003700(molecular_function: sequence-specific DNA binding transcription factor activity), GO:0043565(molecular_function: sequence-specific DNA binding), GO:0006355(biological_process: regulation of transcription, DNA-templated)	AT4G38900.2	Basic-leucine zipper (bZIP) transcription factor family protein
Medtr1g023700	chr1	-	7622290	7624049	6.9815	7.42226	7.77459	12.3909	11.7165	12.0669	14.1907	16.3682	15.7367	47.4987	54.5681	78.8265	cytochrome P450 family 71 protein	PF00067(Cytochrome P450)	PTHR24298:SF44(), PTHR24298(FAMILY NOT NAMED)	KOG0156(Cytochrome P450 CYP2 subfamily)	1.14.-.-()	K11818(Enzyme families: Cytochrome P450 [BR:ko00199]: CYP83B1; aromatic aldoxime N-monooxygenase)	GO:0005506(molecular_function: iron ion binding), GO:0016705(molecular_function: oxidoreductase activity, acting on paired donors, with incorporation or reduction of molecular oxygen), GO:0020037(molecular_function: heme binding), GO:0055114(biological_process: oxidation-reduction process)	AT4G31500.1	cytochrome P450, family 83, subfamily B, polypeptide 1
Medtr1g023710	chr1	+	7624316	7626251	0	0	0	0	0	0	0	0	0	0	0	0	transmembrane protein, putative
Medtr1g023720	chr1	-	7626885	7630409	24.2458	23.8025	26.3188	27.7798	30.3008	27.6128	33.5147	31.5857	31.6716	45.4625	48.4088	67.366	cytochrome P450 family 71 protein	PF00067(Cytochrome P450)	PTHR24298:SF44(), PTHR24298(FAMILY NOT NAMED)	KOG0156(Cytochrome P450 CYP2 subfamily)	1.14.-.-()	K11818(Enzyme families: Cytochrome P450 [BR:ko00199]: CYP83B1; aromatic aldoxime N-monooxygenase)	GO:0005506(molecular_function: iron ion binding), GO:0016705(molecular_function: oxidoreductase activity, acting on paired donors, with incorporation or reduction of molecular oxygen), GO:0020037(molecular_function: heme binding), GO:0055114(biological_process: oxidation-reduction process)	AT4G31500.1	cytochrome P450, family 83, subfamily B, polypeptide 1
Medtr1g023730	chr1	-	7633868	7637366	70.4398	67.4903	60.2589	63.3736	68.4783	60.5028	61.7596	64.6049	68.4028	125.267	120.408	147.612	cytochrome P450 family 71 protein	PF00067(Cytochrome P450)	PTHR24298(FAMILY NOT NAMED), PTHR24298:SF44()	KOG0156(Cytochrome P450 CYP2 subfamily)	1.14.-.-()	K11818(Enzyme families: Cytochrome P450 [BR:ko00199]: CYP83B1; aromatic aldoxime N-monooxygenase)	GO:0005506(molecular_function: iron ion binding), GO:0016705(molecular_function: oxidoreductase activity, acting on paired donors, with incorporation or reduction of molecular oxygen), GO:0020037(molecular_function: heme binding), GO:0055114(biological_process: oxidation-reduction process)	AT3G26330.1	cytochrome P450, family 71, subfamily B, polypeptide 37
Medtr1g023760	chr1	+	7656302	7661637	19.6281	18.5093	21.3071	17.6731	19.3359	17.5799	15.5607	15.7968	20.3127	18.9594	17.1579	17.9287	IQ calmodulin-binding motif protein	PF00612(IQ calmodulin-binding motif)	PTHR10699(NEUROMODULIN), PTHR10699:SF9()				GO:0005515(molecular_function: protein binding)	AT1G19870.1	IQ-domain 32
Medtr1g023770	chr1	-	7661893	7663069	0.173415	0.09069	0.051714	0.032063	0	0.035923	0	0.039415	0	0	0	0.041095	rhicadhesin receptor	PF00190(Cupin)					GO:0045735(molecular_function: nutrient reservoir activity)	AT3G05950.1	RmlC-like cupins superfamily protein
Medtr1g023790	chr1	+	7667528	7667713	0	0	0.221136	0	0	0	0	0	0	0.028274	0	0	hypothetical protein
Medtr1g023800	chr1	-	7668613	7670047	0.055427	0.012963	0	0.064327	0	0	0	0	0	0	0	0	tubby-F-box-like protein	PF01167(Tub family), PF00646(F-box domain)	PTHR16517:SF7(PROTEIN KING TUBBY), PTHR16517(TUBBY-RELATED)				GO:0005515(molecular_function: protein binding)	AT1G47270.1	tubby like protein 6
Medtr1g023810	chr1	+	7670865	7672219	0	0	0	0	0	0	0	0	0	0	0	0	papain family cysteine protease	PF00112(Papain family cysteine protease)	PTHR12411:SF44(), PTHR12411(CYSTEINE PROTEASE FAMILY C1-RELATED)				GO:0008234(molecular_function: cysteine-type peptidase activity), GO:0006508(biological_process: proteolysis)	AT3G48340.1	Cysteine proteinases superfamily protein
Medtr1g023820	chr1	-	7673409	7674084	3.59827	2.36505	3.24436	2.91464	2.62981	2.54102	2.35526	2.0824	4.18939	4.22351	2.56837	2.44661	paired amphipathic helix protein	PF02671(Paired amphipathic helix repeat)	PTHR12346(SIN3B-RELATED)				GO:0006355(biological_process: regulation of transcription, DNA-templated), GO:0005634(cellular_component: nucleus)	AT1G24190.1	SIN3-like 3
Medtr1g023830	chr1	+	7674860	7675126	2.50563	0.811999	2.58654	3.91975	3.19725	2.31199	2.39492	3.96263	3.38571	3.20654	3.08313	3.64729	cation proton exchanger, putative							AT3G17630.1	cation/H+ exchanger 19
Medtr1g023840	chr1	-	7676297	7677023	0.228636	0	0.071079	0	0	0.124158	0	0.039027	0	0	0	0	kinesin motor domain protein	PF00225(Kinesin motor domain)					GO:0003777(molecular_function: microtubule motor activity), GO:0005524(molecular_function: ATP binding), GO:0008017(molecular_function: microtubule binding), GO:0007018(biological_process: microtubule-based movement)	AT3G44050.1	P-loop containing nucleoside triphosphate hydrolases superfamily protein
Medtr1g423950	chr1	+	7696168	7696789	0.004819	0	0.008293	0	0	0.010179	0	0	0	0	0	0	hypothetical protein
Medtr1g423960	chr1	-	7697338	7698717	6.90058	6.84368	6.69247	3.13074	4.45993	2.39914	5.29472	4.3513	1.27011	1.53436	1.08005	3.25568	small RNA degrading nuclease		PTHR12801(EXONUCLEASE), PTHR12801:SF9()					AT5G67240.1	small RNA degrading nuclease 3
Medtr1g023910	chr1	-	7700452	7702012	1.42575	1.41009	1.70686	2.36312	1.90434	1.72929	2.50471	1.98254	2.47676	2.75854	2.99001	1.69647	hypothetical protein							AT3G26560.1	ATP-dependent RNA helicase, putative
Medtr1g023920	chr1	+	7704021	7704956	0.942827	0.466372	0.659726	1.3221	1.25089	1.10475	1.32265	1.47945	1.31778	1.88596	1.30331	2.09323	transmembrane protein, putative
Medtr1g023880	chr1	-	7706329	7706605	0.108474	0	0	0.26889	0	0.093246	0.088955	0	0	0	0	0	hypothetical protein
Medtr1g023925	chr1	-	7707992	7708506	0	0	0	0	0	0	0	0	0	0	0	0	IQ-domain protein, putative
Medtr1g023955	chr1	+	7733337	7739883	16.8489	14.9005	11.6515	10.6383	14.2555	13.3393	14.0466	11.3977	10.1684	13.8031	13.2143	10.4273	small RNA degrading nuclease	PF00929(Exonuclease)	PTHR12801(EXONUCLEASE), PTHR12801:SF9()	KOG2248(3'-5' exonuclease)				AT5G67240.1	small RNA degrading nuclease 3
Medtr1g023965	chr1	+	7741635	7742815	0	0	0	0	0	0	0	0	0.004141	0	0	0	hypothetical protein
Medtr1g023975	chr1	+	7742965	7743951	0	0	0	0	0	0	0	0	0	0	0	0	global transcription factor group protein	PF03439(Early transcription elongation factor of RNA pol II, NGN section)	PTHR11125(SUPPRESSOR OF TY 5)					AT4G08350.1	global transcription factor group A2
Medtr1g023870	chr1	+	7745970	7748704	0	0	0	0.00333	0	0	0.03274	0	0	0.007492	0	0	transcription elongation factor SPT5-like protein, putative		PTHR11125(SUPPRESSOR OF TY 5)					AT4G08350.1	global transcription factor group A2
Medtr1g023985	chr1	+	7751166	7755800	2.92974	2.35501	2.45119	2.57342	2.32365	2.3469	2.49727	2.40678	2.55252	2.92112	2.16074	2.59276	ATP-dependent RNA helicase DHX8	PF07717(Oligonucleotide/oligosaccharide-binding (OB)-fold), PF00270(DEAD/DEAH box helicase), PF04408(Helicase associated domain (HA2)), PF00271(Helicase conserved C-terminal domain), PF00575(S1 RNA binding domain)	PTHR18934:SF68(), PTHR18934(ATP-DEPENDENT RNA HELICASE)	KOG0922(DEAH-box RNA helicase)	3.6.4.13(RNA helicase.)	K12818(Transcription: Spliceosome [BR:ko03041]: DHX8, PRP22; ATP-dependent RNA helicase DHX8/PRP22)	GO:0003676(molecular_function: nucleic acid binding), GO:0005524(molecular_function: ATP binding), GO:0008026(molecular_function: ATP-dependent helicase activity), GO:0004386(molecular_function: helicase activity), GO:0003723(molecular_function: RNA binding)	AT3G26560.1	ATP-dependent RNA helicase, putative
Medtr1g023995	chr1	-	7757558	7758026	2.18664	1.18241	2.26989	3.11285	2.72139	1.93773	2.46304	3.18612	2.61356	2.65048	3.44784	1.36128	hypothetical protein
Medtr1g024005	chr1	+	7759632	7761462	5.73305	5.22294	3.98787	7.11922	6.45882	6.71098	8.25794	8.41519	6.84613	6.38408	6.38145	4.55713	ATRAD3	PF03141(Putative S-adenosyl-L-methionine-dependent methyltransferase)	PTHR10108:SF434(), PTHR10108(METHYLTRANSFERASE)				GO:0008168(molecular_function: methyltransferase activity)	AT3G27230.1	S-adenosyl-L-methionine-dependent methyltransferases superfamily protein
Medtr1g024015	chr1	+	7765967	7768043	7.3077	5.54419	6.97152	8.96709	8.02026	7.78198	6.69436	7.99662	9.21407	7.64278	7.00838	8.99725	hypothetical protein
Medtr1g024025	chr1	-	7771119	7778460	0.74277	1.0073	0.775107	1.25358	1.25774	1.6934	1.02045	1.00725	0.940835	0.894176	0.814695	0.74483	auxin response factor 2	PF02362(B3 DNA binding domain), PF02309(AUX/IAA family), PF06507(Auxin response factor)				K14486(Signal transduction: Plant hormone signal transduction [PATH:ko04075]: K14486, ARF; auxin response factor)	GO:0006355(biological_process: regulation of transcription, DNA-templated), GO:0005634(cellular_component: nucleus), GO:0003677(molecular_function: DNA binding), GO:0009725(biological_process: response to hormone)	AT1G19850.1	Transcriptional factor B3 family protein / auxin-responsive factor AUX/IAA-related
Medtr1g024085	chr1	+	7821600	7822895	0	0.063053	0.115047	0	0	0.094066	0.028819	0.035795	0.071176	0	0.043357	0.037322	SAUR-like auxin-responsive family protein	PF02519(Auxin responsive protein)				K14488(Signal transduction: Plant hormone signal transduction [PATH:ko04075]: SAUR; SAUR family protein)		AT1G75590.1	SAUR-like auxin-responsive protein family
Medtr1g024095	chr1	+	7850648	7855990	15.5948	14.1542	18.3577	15.7408	15.7559	13.6704	19.0418	12.8182	13.1522	8.68082	5.05698	3.31412	filament-plant-like protein	PF05911(Filament-like plant protein, long coiled-coil)						AT1G19835.1	Plant protein of unknown function (DUF869)
Medtr1g024125	chr1	+	7873360	7873827	0	0.088633	0	0	0	0	0	0	0	0	0	0	transmembrane protein, putative
Medtr1g024145	chr1	+	7882927	7885168	0	0	0	0	0	0	0	0	0	0	0	0	lysine decarboxylase family protein	PF03641(Possible lysine decarboxylase)						AT2G28305.1	Putative lysine decarboxylase family protein
Medtr1g024165	chr1	+	7888376	7888825	0	0	0	0	0	0	0	0	0	0	0	0	elongation factor Tu GTP-binding domain protein	PF00009(Elongation factor Tu GTP binding domain)	PTHR23115:SF57(), PTHR23115(TRANSLATION FACTOR)				GO:0003924(molecular_function: GTPase activity), GO:0005525(molecular_function: GTP binding)	AT5G60390.1	GTP binding Elongation factor Tu family protein
Medtr1g024175	chr1	+	7890653	7892029	0.029686	0.060147	0.019753	0.027683	0.047475	0.022978	0.062322	0.050479	0.052084	0.112969	0.18261	0.163571	GTP-binding elongation factor Tu family protein	PF00009(Elongation factor Tu GTP binding domain), PF03144(Elongation factor Tu domain 2), PF03143(Elongation factor Tu C-terminal domain)	PTHR23115(TRANSLATION FACTOR), PTHR23115:SF57()	KOG0052(Translation elongation factor EF-1 alpha/Tu)			GO:0003924(molecular_function: GTPase activity), GO:0005525(molecular_function: GTP binding)	AT5G60390.1	GTP binding Elongation factor Tu family protein
MT4Noble_001139	chr1	-	7893005	7894099	0.092378	0	0	0.016001	0.51735	0	0.248906	0.292664	0.083133	0.09505	0.141518	0.300365
MT4Noble_001140	chr1	-	7894111	7897234	0.351048	0.439462	0.366556	0.926747	1.0443	0.724029	0.671145	0.932052	0.955691	0.845826	1.21792	1.09258	DEAD-box ATP-dependent RNA helicase-like protein
MT4Noble_001141	chr1	-	7897560	7899458	0.765968	0.210922	0.193494	0.631796	0.932104	0.403234	0.580337	0.688347	0.608195	0.945139	0.546951	0.934907
Medtr1g024850	chr1	+	7899288	7900166	0	0	0	0	0	0	0	0	0	0	0	0.054863	cytokinin riboside 5'-monophosphate phosphoribohydrolase							AT2G35990.1	Putative lysine decarboxylase family protein
MT4Noble_001143	chr1	-	7900598	7900753	0.882921	0.890762	0.559218	1.57691	3.02892	2.5495	1.7296	2.16392	2.3189	1.39293	1.8094	2.90316
Medtr1g024860	chr1	-	7900686	7908945	1.23596	1.22913	1.0788	1.58228	1.68764	1.89568	2.02383	1.89831	1.75642	1.36974	1.52542	1.60345	RNase L inhibitor ABC domain protein	PF04068(Possible Fer4-like domain in RNase L inhibitor, RLI), PF00037(4Fe-4S binding domain), PF00005(ABC transporter)	PTHR19248(ATP-BINDING TRANSPORT PROTEIN-RELATED)	KOG0063(RNAse L inhibitor, ABC superfamily)			GO:0005524(molecular_function: ATP binding), GO:0016887(molecular_function: ATPase activity), GO:0051536(molecular_function: iron-sulfur cluster binding)	AT4G19210.1	RNAse l inhibitor protein 2
Medtr1g024870	chr1	+	7909538	7909906	0	0	0	0	0	0.042777	0	0	0	0	0	0	hypothetical protein
Medtr1g024820	chr1	-	7912992	7918788	1.46315	1.20405	1.17102	2.1651	2.1293	1.65853	1.70616	2.23656	1.70882	1.72071	2.12889	2.57415	transcription factor bHLH140-like protein	PF01661(Macro domain), PF06414(Zeta toxin), PF11969(Scavenger mRNA decapping enzyme C-term binding)	PTHR12486:SF4(APRATAXIN), PTHR12486(APRATAXIN-RELATED)	KOG0562(Predicted hydrolase (HIT family))	3.-.-.-()	K10863(Replication and repair: DNA repair and recombination proteins [BR:ko03400]: APTX; aprataxin)	GO:0005524(molecular_function: ATP binding), GO:0016301(molecular_function: kinase activity)	AT5G01310.1	APRATAXIN-like
Medtr1g024830	chr1	+	7921698	7923227	2.99992	2.0232	2.41832	3.22948	2.59697	3.29253	3.87547	2.49107	3.21407	3.65755	3.51215	3.09429	Myb/SANT-like DNA-binding domain protein							AT3G11310.1
Medtr1g024840	chr1	-	7924436	7926622	28.2586	24.5863	48.9679	21.2464	14.1696	15.3175	31.8549	37.0175	25.3691	11.4762	9.19601	5.30013	protein disulfide-isomerase LQY1							AT1G75690.1	DnaJ/Hsp40 cysteine-rich domain superfamily protein
Medtr1g024930	chr1	-	7928188	7931700	0.395295	0.373812	0.972179	0.580005	0.474903	0.525679	0.450981	0.470174	0.493053	0.242416	0.273667	0.301411	abscisic acid-responsive (TB2/DP1, HVA22) family protein	PF03134(TB2/DP1, HVA22 family)	PTHR12300(HVA22-LIKE PROTEINS), PTHR12300:SF20()	KOG1726(HVA22/DP1 gene product-related proteins)				AT5G42560.1	Abscisic acid-responsive (TB2/DP1, HVA22) family protein
Medtr1g024920	chr1	-	7935263	7942696	14.3549	12.6845	12.7078	18.5295	13.8409	14.0963	13.8351	13.0906	16.4482	14.9656	12.3675	11.4373	tRNA (guanine-N(1))-methyltransferase, putative	PF04189(Gcd10p family)	PTHR12945(TRANSLATION INITIATION FACTOR EIF3-RELATED)	KOG1416(tRNA(1-methyladenosine) methyltransferase, subunit GCD10)		K03256(Translation: Transfer RNA biogenesis [BR:ko03016]: TRM6, GCD10; tRNA (adenine-N(1)-)-methyltransferase non-catalytic subunit)	GO:0003743(molecular_function: translation initiation factor activity), GO:0006413(biological_process: translational initiation)	AT2G45730.1	eukaryotic initiation factor 3 gamma subunit family protein
Medtr1g024980	chr1	+	7957883	7961646	20.9258	22.7169	31.1511	30.4797	20.1598	18.3067	22.5887	19.5145	18.0952	8.19684	5.76636	4.4698	C2H2-like zinc finger protein							AT1G75710.1	C2H2-like zinc finger protein
Medtr1g024970	chr1	-	7964789	7965220	0	0	0	0	0	0	0	0	0	0	0	0	GRF zinc finger protein	PF06839(GRF zinc finger)					GO:0008270(molecular_function: zinc ion binding)
Medtr1g025060	chr1	+	7989023	7993790	8.82049	8.52146	6.75167	16.1342	12.173	11.9318	11.9517	11.4285	11.4249	8.8142	8.33988	9.07849	uridine 5-monophosphate synthase-like protein	PF00156(Phosphoribosyl transferase domain), PF00215(Orotidine 5'-phosphate decarboxylase / HUMPS family)	PTHR19278(FAMILY NOT NAMED), PTHR19278:SF21()	KOG1377(Uridine 5'- monophosphate synthase/orotate phosphoribosyltransferase)	2.4.2.10(Orotate phosphoribosyltransferase.), 4.1.1.23(Orotidine-5'-phosphate decarboxylase.)	K13421(Xenobiotics biodegradation and metabolism: Drug metabolism - other enzymes [PATH:ko00983]: UMPS; uridine monophosphate synthetase)	GO:0009116(biological_process: nucleoside metabolic process), GO:0004590(molecular_function: orotidine-5'-phosphate decarboxylase activity), GO:0006207(biological_process: 'de novo' pyrimidine nucleobase biosynthetic process)	AT3G54470.1	uridine 5\'-monophosphate synthase / UMP synthase (PYRE-F) (UMPS)
Medtr1g025075	chr1	+	7999442	8005224	6.21347	5.11207	5.08561	7.30387	7.19559	6.77205	5.86705	5.9685	5.58976	5.88622	5.93227	7.18134	RNase L inhibitor ABC superfamily protein, putative	PF00005(ABC transporter)	PTHR19248(ATP-BINDING TRANSPORT PROTEIN-RELATED)	KOG0063(RNAse L inhibitor, ABC superfamily)			GO:0005524(molecular_function: ATP binding), GO:0016887(molecular_function: ATPase activity)	AT4G19210.1	RNAse l inhibitor protein 2
Medtr1g025140	chr1	-	8014050	8017043	6.08412	6.08328	5.74069	7.38006	6.71091	7.5701	8.91918	8.20776	8.07577	8.07649	8.41996	8.44016	hexokinase	PF00349(Hexokinase), PF03727(Hexokinase)	PTHR19443(HEXOKINASE)	KOG1369(Hexokinase)			GO:0005524(molecular_function: ATP binding), GO:0016773(molecular_function: phosphotransferase activity, alcohol group as acceptor), GO:0005975(biological_process: carbohydrate metabolic process)	AT1G47840.1	hexokinase 3
Medtr1g025180	chr1	+	8019758	8023607	7.40747	6.79285	6.05639	12.1298	12.0263	10.7591	10.0579	9.65149	10.4815	9.95852	9.52134	11.9557	hypothetical protein							AT1G75730.1
Medtr1g025190	chr1	-	8024026	8026304	59.844	63.3723	53.9579	58.1421	52.1055	56.6705	55.7495	53.1305	46.2918	54.4948	54.6356	50.9859	clathrin adaptor complex small chain	PF01217(Clathrin adaptor complex small chain)	PTHR11753(CLATHRIN COAT ASSEMBLY PROTEIN)	KOG0935(Clathrin adaptor complex, small subunit)		K11827(Neurodegenerative diseases: Huntington's disease [PATH:ko05016]: AP2S1; AP-2 complex subunit sigma-1)		AT1G47830.1	SNARE-like superfamily protein
MT4Noble_001163	chr1	-	8024261	8024431	22.6006	24.5267	20.7344	24.1613	20.9487	19.7221	21.1789	19.8358	16.0774	21.0872	20.1469	19.7082	Full=TSA: Wollemia nobilis Ref_Wollemi_Transcript_1946_1026 transcribed RNA sequence
Medtr1g025200	chr1	+	8032620	8034159	2.02043	1.88172	2.71294	2.2993	2.00934	1.80549	2.10901	1.70913	2.57756	2.21979	1.71543	2.94061	hypothetical protein
Medtr1g025220	chr1	-	8034809	8036000	2.81558	5.6333	8.63892	0.821108	0.619309	0.23955	1.52776	0.960604	0.666838	13.0197	4.22401	2.40657	GASA/GAST/Snakin	PF02704(Gibberellin regulated protein)						AT1G75750.1	GAST1 protein homolog 1
Medtr1g025235	chr1	-	8039288	8039473	18.7594	19.0557	22.6816	22.4646	22.9765	29.4299	22.8501	23.0757	28.8917	27.9942	15.0467	13.161	hypothetical protein
Medtr1g025250	chr1	-	8042165	8043284	392.332	414.754	542.631	143.861	162.685	95.7218	150.715	68.1444	84.884	162.544	53.0967	39.94	GASA/GAST/Snakin	PF02704(Gibberellin regulated protein)						AT1G75750.1	GAST1 protein homolog 1
Medtr1g025290	chr1	+	8062507	8064500	5.21357	5.10151	3.79526	7.00534	7.04967	6.49236	8.33371	9.53316	9.11958	5.41749	5.04243	3.63225	hypothetical protein
Medtr1g025310	chr1	+	8071783	8073016	0	0	0	0	0	0	0	0	0	0	0	0	hypothetical protein
Medtr1g025320	chr1	-	8076738	8082271	13.0958	13.6671	12.6594	17.3698	15.4388	15.5274	12.0194	17.1171	15.7175	14.0441	20.7513	19.6074	ribosomal protein L32	PF01783(Ribosomal L32p protein family)					GO:0003735(molecular_function: structural constituent of ribosome), GO:0006412(biological_process: translation), GO:0015934(cellular_component: large ribosomal subunit)	AT1G26740.1	Ribosomal L32p protein family
Medtr1g025340	chr1	+	8086924	8092881	32.0692	50.9774	32.3911	15.2743	22.8574	19.2379	12.076	10.9344	16.3585	17.5289	22.5685	23.4655	DUF668 family protein	PF11961(Domain of unknown function (DUF3475)), PF05003(Protein of unknown function (DUF668))						AT1G30755.1	Protein of unknown function (DUF668)
Medtr1g025370	chr1	+	8107105	8107674	1.51353	0.654729	0.655544	2.66564	2.21371	2.15917	1.89223	1.48123	2.26409	3.03826	1.04601	1.53862	cathepsin propeptide inhibitor domain protein	PF08246(Cathepsin propeptide inhibitor domain (I29))	PTHR12411(CYSTEINE PROTEASE FAMILY C1-RELATED)					AT1G29110.1	Cysteine proteinases superfamily protein
Medtr1g025420	chr1	+	8118419	8120647	7.64781	10.6302	10.0502	11.5359	15.7694	8.60023	8.62979	5.05266	3.81142	3.64006	4.54181	5.04085	pathogenesis-related thaumatin family protein	PF00314(Thaumatin family)						AT1G20030.2	Pathogenesis-related thaumatin superfamily protein
Medtr1g025430	chr1	-	8126353	8131899	480.121	484.506	383.541	151.676	188.106	185.337	242.353	137.5	154.605	159.512	163.363	126.93	heat shock protein 81-2	PF00183(Hsp90 protein), PF02518(Histidine kinase-, DNA gyrase B-, and HSP90-like ATPase)	PTHR11528:SF36(), PTHR11528(HEAT SHOCK PROTEIN 90)	KOG0020(Endoplasmic reticulum glucose-regulated protein (GRP94/endoplasmin), HSP90 family)			GO:0005524(molecular_function: ATP binding), GO:0051082(molecular_function: unfolded protein binding), GO:0006457(biological_process: protein folding), GO:0006950(biological_process: response to stress)	AT4G24190.2	Chaperone protein htpG family protein
Medtr1g025450	chr1	-	8134532	8137849	0	0	0.000702	0	0	0	0	0	0	0	0.000793	0	papain family cysteine protease	PF00112(Papain family cysteine protease)	PTHR12411(CYSTEINE PROTEASE FAMILY C1-RELATED)				GO:0008234(molecular_function: cysteine-type peptidase activity), GO:0006508(biological_process: proteolysis)	AT5G18520.1	Lung seven transmembrane receptor family protein
Medtr1g025460	chr1	+	8141088	8141276	0	0	0	0	0	0	0.020158	0	0	0	0	0	hypothetical protein
Medtr1g025490	chr1	+	8153578	8154569	1.53136	3.64081	4.2324	1.40489	2.54962	1.11357	1.32383	1.84052	0.942582	1.30539	1.11797	2.67508	transmembrane protein, putative							AT1G75810.1
Medtr1g025500	chr1	-	8157128	8163279	4.60558	5.3898	4.86576	5.03038	5.14985	5.83818	4.72765	5.28672	5.58295	7.07608	6.70674	7.97148	transcription elongation factor (TFIIS) family protein, putative							AT4G24200.1	Transcription elongation factor (TFIIS) family protein
Medtr1g025530	chr1	-	8171610	8171996	0	0	0	0	0	0	0	0	0	0.004348	0	0	cAMP-regulated phosphoprotein-like protein	PF04667(cAMP-regulated phosphoprotein/endosulfine conserved region)						AT5G64130.1	cAMP-regulated phosphoprotein 19-related protein
Medtr1g025550	chr1	-	8173689	8178113	52.9663	46.8039	49.6843	62.3638	53.1624	57.1124	59.6441	57.4444	53.796	44.7539	43.0929	34.4569	calcium-dependent lipid-binding (CaLB domain) family protein	PF00168(C2 domain)	PTHR10774:SF2(), PTHR10774(EXTENDED SYNAPTOTAGMIN-RELATED)				GO:0005515(molecular_function: protein binding)	AT1G20080.1	Calcium-dependent lipid-binding (CaLB domain) family protein
Medtr1g025560	chr1	+	8180282	8185564	0	0	0	0	0	0	0	0	0	0	0	0.000476	ABC transporter B family protein	PF00005(ABC transporter), PF00664(ABC transporter transmembrane region)	PTHR24221(FAMILY NOT NAMED), PTHR24221:SF96()	KOG0055(Multidrug/pheromone exporter, ABC superfamily)			GO:0005524(molecular_function: ATP binding), GO:0016887(molecular_function: ATPase activity), GO:0042626(molecular_function: ATPase activity, coupled to transmembrane movement of substances), GO:0006810(biological_process: transport), GO:0055085(biological_process: transmembrane transport), GO:0016021(cellular_component: integral component of membrane)	AT1G27940.1	P-glycoprotein 13
Medtr1g025570	chr1	-	8186269	8187285	0	0	0	0	0.164872	0	0	0.088364	0	0	0.100252	0	plant/K21P3-8 protein, putative							AT5G49210.1
MT4Noble_001188	chr1	-	8188334	8189170	0	0	0.209239	0	0.069833	0	0	0	0	0	0	0	FBD protein | PF08387 FBD
Medtr1g025600	chr1	-	8192819	8193217	0	0	0	0	0	0	0	0.205794	0.009247	0	0	0	hypothetical protein
MT4Noble_001190	chr1	-	8193220	8193511	0	0	0	0	0	0	0	0.036141	0.088356	0	0	0	F-box/RNI superfamily protein, putative | PF00646 F-box domain
Medtr1g025610	chr1	-	8194669	8204815	19.0782	19.3348	17.7474	12.8903	14.8593	15.0408	11.6687	10.8933	12.5002	15.9624	14.3391	15.274	vacuolar protein sorting-associated 35A-like protein	PF03635(Vacuolar protein sorting-associated protein 35 )	PTHR11099(VACUOLAR SORTING PROTEIN 35)	KOG1107(Membrane coat complex Retromer, subunit VPS35)			GO:0015031(biological_process: protein transport), GO:0042147(biological_process: retrograde transport, endosome to Golgi), GO:0030904(cellular_component: retromer complex)	AT1G75850.1	VPS35 homolog B
Medtr1g025620	chr1	-	8206318	8208807	48.1011	49.6037	50.8621	48.3318	43.1429	44.0213	41.8383	43.1615	51.4785	56.1823	50.476	50.6793	hypothetical protein							AT4G35940.1
Medtr1g025640	chr1	-	8214719	8215545	0	0	0	0	0	0	0	0	0.003877	0	0	0	hypothetical protein
Medtr1g025655	chr1	+	8218924	8219898	0.127766	0.101822	0.051031	0.343402	0.021728	0.124891	0.141699	0.04758	0.228953	0	0.073961	0.097234	hypothetical protein
Medtr1g025670	chr1	-	8225287	8226756	0	0	0	0	0	0	0	0	0	0	0	0	hypothetical protein
Medtr1g025680	chr1	+	8230926	8235973	21.5175	17.8395	21.7314	17.1224	14.5083	17.2523	14.4294	13.3475	13.6021	11.0832	10.2069	9.15523	GDSL-like lipase/acylhydrolase	PF00657(GDSL-like Lipase/Acylhydrolase)	PTHR22835(ZINC FINGER FYVE DOMAIN CONTAINING PROTEIN), PTHR22835:SF39()				GO:0016788(molecular_function: hydrolase activity, acting on ester bonds), GO:0006629(biological_process: lipid metabolic process)	AT1G75890.2	GDSL-like Lipase/Acylhydrolase superfamily protein
Medtr1g025700	chr1	+	8242402	8245929	1.79255	1.5067	3.14077	1.41804	1.55759	1.54133	0.612128	0.883914	1.1318	0.612568	1.02562	0.568489	GDSL-like lipase/acylhydrolase	PF00657(GDSL-like Lipase/Acylhydrolase)	PTHR22835(ZINC FINGER FYVE DOMAIN CONTAINING PROTEIN), PTHR22835:SF39()				GO:0016788(molecular_function: hydrolase activity, acting on ester bonds), GO:0006629(biological_process: lipid metabolic process)	AT1G75880.2	SGNH hydrolase-type esterase superfamily protein
Medtr1g025720	chr1	+	8252489	8255443	0.757321	1.13933	1.90645	0.83748	0.573072	0.970287	0.659757	0.770755	0.784737	0.746441	0.180731	0.317397	GDSL-like lipase/acylhydrolase	PF00657(GDSL-like Lipase/Acylhydrolase)	PTHR22835(ZINC FINGER FYVE DOMAIN CONTAINING PROTEIN), PTHR22835:SF39()				GO:0016788(molecular_function: hydrolase activity, acting on ester bonds), GO:0006629(biological_process: lipid metabolic process)	AT1G75880.2	SGNH hydrolase-type esterase superfamily protein
Medtr1g025780	chr1	+	8285801	8290431	0.036312	0	0	0.033298	0.04337	0	0	0	0.040287	0.055124	0	0.029674	GDSL-like lipase/acylhydrolase	PF00657(GDSL-like Lipase/Acylhydrolase)	PTHR22835(ZINC FINGER FYVE DOMAIN CONTAINING PROTEIN), PTHR22835:SF39()				GO:0016788(molecular_function: hydrolase activity, acting on ester bonds), GO:0006629(biological_process: lipid metabolic process)	AT1G75900.1	GDSL-like Lipase/Acylhydrolase superfamily protein
Medtr1g025800	chr1	+	8292429	8295330	0	0	0	0	0	0.018766	0.033043	0	0	0	0	0	F-box protein	PF00646(F-box domain)					GO:0005515(molecular_function: protein binding)	AT3G56470.1	F-box family protein
Medtr1g025810	chr1	-	8297017	8297751	0	0	0	0	0	0.057525	0	0	0	0	0	0	F-box-like protein	PF00646(F-box domain)					GO:0005515(molecular_function: protein binding)	AT3G16210.1	F-box family protein
Medtr1g025830	chr1	-	8300592	8301266	0	0	0	0	0	0	0	0	0	0	0	0	F-box-like protein	PF00646(F-box domain)					GO:0005515(molecular_function: protein binding)	AT3G16210.1	F-box family protein
Medtr1g025850	chr1	-	8309793	8310425	0	0	0	0	0	0	0	0	0	0	0	0	hypothetical protein
Medtr1g025870	chr1	+	8316225	8318280	0	0	0	0	0	0	0	0.001279	0	0	0.006196	0	F-box/RNI/FBD-like domain protein	PF00646(F-box domain), PF08387(FBD)					GO:0005515(molecular_function: protein binding)	AT5G22730.1	F-box/RNI-like/FBD-like domains-containing protein
Medtr1g025910	chr1	+	8335594	8337087	0	0	0	0	0	0	0	0	0	0	0	0	GDSL-like lipase/acylhydrolase	PF00657(GDSL-like Lipase/Acylhydrolase)	PTHR22835(ZINC FINGER FYVE DOMAIN CONTAINING PROTEIN), PTHR22835:SF39()				GO:0016788(molecular_function: hydrolase activity, acting on ester bonds), GO:0006629(biological_process: lipid metabolic process)	AT1G23500.1	GDSL-like Lipase/Acylhydrolase superfamily protein
Medtr1g025920	chr1	-	8339214	8346097	11.3451	12.3989	8.40942	10.2163	10.3449	10.6068	10.6419	10.2472	10.4673	11.3441	12.1517	12.5302	LA-related protein 6 LA RNA-binding domain protein	PF05383(La domain)	PTHR22792(LUPUS LA PROTEIN-RELATED), PTHR22792:SF23()					AT5G66100.1	winged-helix DNA-binding transcription factor family protein
Medtr1g025950	chr1	+	8352878	8355066	64.3915	74.852	47.0127	13.1225	26.6689	25.6612	17.904	9.31531	11.1976	17.0525	18.6386	12.8738	cinnamyl alcohol dehydrogenase-like protein	PF08240(Alcohol dehydrogenase GroES-like domain), PF00107(Zinc-binding dehydrogenase)	PTHR11695(ALCOHOL DEHYDROGENASE RELATED), PTHR11695:SF285(L-THREONINE 3-DEHYDROGENASE)	KOG0023(Alcohol dehydrogenase, class V)			GO:0008270(molecular_function: zinc ion binding), GO:0016491(molecular_function: oxidoreductase activity), GO:0055114(biological_process: oxidation-reduction process)	AT4G39330.1	cinnamyl alcohol dehydrogenase 9
Medtr1g025960	chr1	+	8356913	8358551	0.140413	0	0.039771	0.072684	0.123335	0.035087	0.124396	0.076868	0.229905	0.05202	0.1558	0.201772	transmembrane protein	PF05055(Protein of unknown function (DUF677))						AT1G20180.1	Protein of unknown function (DUF677)
Medtr1g025980	chr1	-	8360879	8362371	0.000696	0.027885	0	0	0	0	0	0	0	0	0	0	peroxidase family protein	PF00141(Peroxidase)			1.11.1.7(Peroxidase.)	K00430(Biosynthesis of other secondary metabolites: Phenylpropanoid biosynthesis [PATH:ko00940]: E1.11.1.7; peroxidase)	GO:0004601(molecular_function: peroxidase activity), GO:0020037(molecular_function: heme binding), GO:0006979(biological_process: response to oxidative stress), GO:0055114(biological_process: oxidation-reduction process)	AT5G42180.1	Peroxidase superfamily protein
Medtr1g026020	chr1	-	8373566	8375989	0	0	0	0	0	0	0	0	0	0	0	0.045885	expansin-A1-like protein	PF03330(Rare lipoprotein A (RlpA)-like double-psi beta-barrel), PF01357(Pollen allergen)						AT1G20190.1	expansin 11
Medtr1g026030	chr1	-	8377821	8383258	18.4038	17.0488	16.8286	17.2354	17.8848	16.0807	17.8812	15.4205	14.7164	17.9402	17.8631	15.7981	26S proteasome non-ATPase regulatory subunit 3	PF01399(PCI domain), PF08375(Proteasome regulatory subunit C-terminal)	PTHR10758(26S PROTEASOME NON-ATPASE REGULATORY SUBUNIT 3/COP9 SIGNALOSOME COMPLEX SUBUNIT 3), PTHR10758:SF2(26S PROTEASOME NON-ATPASE REGULATORY SUBUNIT 3)	KOG2581(26S proteasome regulatory complex, subunit RPN3/PSMD3)		K03033(Infectious diseases: Epstein-Barr virus infection [PATH:ko05169]: PSMD3, RPN3; 26S proteasome regulatory subunit N3)	GO:0005515(molecular_function: protein binding), GO:0030234(molecular_function: enzyme regulator activity), GO:0042176(biological_process: regulation of protein catabolic process), GO:0000502(cellular_component: proteasome complex)	AT1G20200.1	PAM domain (PCI/PINT associated module) protein
Medtr1g026035	chr1	+	8385143	8388094	1.58218	1.34711	1.7557	2.68168	2.11656	2.617	3.31726	3.78263	3.2536	2.66992	2.4447	2.37556	PPR containing plant-like protein	PF03161(LAGLIDADG DNA endonuclease family), PF01535(PPR repeat)	PTHR24015(FAMILY NOT NAMED)				GO:0004519(molecular_function: endonuclease activity)	AT2G15820.1	endonucleases
MT4Noble_001223	chr1	+	8387865	8389591	0.675263	0.580123	0.929611	1.89815	1.09976	1.43387	1.97195	2.68765	1.76577	1.724	1.12043	1.31145
Medtr1g026070	chr1	+	8393300	8394110	0.796205	0.6049	1.09327	1.75322	1.05914	1.74702	2.64464	2.16377	1.94951	6.07368	4.63546	7.62153	anaphase-promoting complex subunit 11 RING-H2 finger protein	PF00097(Zinc finger, C3HC4 type (RING finger))	PTHR14155(RING FINGER DOMAIN-CONTAINING)				GO:0046872(molecular_function: metal ion binding)	AT5G42200.1	RING/U-box superfamily protein
Medtr1g026072	chr1	+	8401406	8401849	0	0	0	0	0	0	0	0	0.000416	0	0	0	hypothetical protein
Medtr1g026075	chr1	+	8403017	8403813	0.107709	0.207696	0.124683	0.01532	0	0	0	0	0	0	0.23911	0.040708	calcium-dependent kinase family protein	PF00069(Protein kinase domain)	PTHR24347(SERINE/THREONINE-PROTEIN KINASE), PTHR24347:SF13()				GO:0004672(molecular_function: protein kinase activity), GO:0005524(molecular_function: ATP binding), GO:0006468(biological_process: protein phosphorylation)	AT1G76040.2	calcium-dependent protein kinase 29
Medtr1g026190	chr1	+	8404402	8408507	1.69706	1.24199	1.57269	1.10512	1.64718	1.11359	1.02685	1.19785	1.01072	1.36967	1.01497	1.40306	calcium-dependent kinase	PF00069(Protein kinase domain), PF00036(EF hand)	PTHR24347(SERINE/THREONINE-PROTEIN KINASE), PTHR24347:SF13()	KOG0032(Ca2+/calmodulin-dependent protein kinase, EF-Hand protein superfamily)			GO:0005509(molecular_function: calcium ion binding), GO:0004672(molecular_function: protein kinase activity), GO:0005524(molecular_function: ATP binding), GO:0006468(biological_process: protein phosphorylation)	AT1G76040.2	calcium-dependent protein kinase 29
Medtr1g026200	chr1	-	8409408	8409731	0.128303	0.257758	0	0.32786	0	0.130497	0	0	0.27711	0.081805	0.313906	0.07315	hypothetical protein
Medtr1g026078	chr1	-	8410910	8413910	7.34656	7.92632	7.83258	7.2137	8.96564	6.34679	7.80753	6.61189	7.17245	7.73492	9.81194	9.12386	complex 1 protein, LYR family protein	PF05347(Complex 1 protein (LYR family))						AT1G76060.1	LYR family of Fe/S cluster biogenesis protein
Medtr1g026090	chr1	+	8424552	8425507	0	0	0	0	0	0	0	0	0.03453	0.026997	0	0.004311	60S ribosomal L23-like protein	PF00238(Ribosomal protein L14p/L23e)	PTHR11761(50S/60S RIBOSOMAL PROTEIN L14/L23)	KOG0901(60S ribosomal protein L14/L17/L23)			GO:0003735(molecular_function: structural constituent of ribosome), GO:0006412(biological_process: translation), GO:0005840(cellular_component: ribosome)	AT3G04400.1	Ribosomal protein L14p/L23e family protein
Medtr1g026100	chr1	-	8428388	8429355	0.592646	0.641996	1.00593	2.30012	1.38992	0.855001	1.8927	2.886	1.79205	1.07363	1.69146	1.14428	LYR family of Fe/S cluster biogenesis protein		PTHR13675(FAMILY NOT NAMED)					AT1G76065.1	LYR family of Fe/S cluster biogenesis protein
Medtr1g026110	chr1	+	8431354	8432503	34.7671	49.7911	21.1422	78.3345	59.1743	69.4691	32.794	29.0203	50.5721	96.6529	103.679	96.3631	syringolide-induced protein 14-1-1							AT1G76070.1
Medtr1g026125	chr1	-	8437558	8438652	354.55	327.462	319.648	458.263	400.026	443.987	521.32	522.088	504.267	473.808	475.297	430.562	CDSP32 protein (drought-induced stress protein of 32 kDa)	PF00085(Thioredoxin)	PTHR10438(THIOREDOXIN), PTHR10438:SF71()	KOG0907(Thioredoxin)			GO:0045454(biological_process: cell redox homeostasis)	AT1G76080.1	chloroplastic drought-induced stress protein of 32 kD
Medtr1g026140	chr1	-	8446317	8447711	10.6572	11.2786	13.0038	20.1715	14.6736	19.8519	22.4616	27.66	21.1453	12.4459	15.6158	14.4396	glutathione S-transferase, amine-terminal domain protein	PF00043(Glutathione S-transferase, C-terminal domain), PF02798(Glutathione S-transferase, N-terminal domain)	PTHR11260(GLUTATHIONE S-TRANSFERASE, GST, SUPERFAMILY, GST DOMAIN CONTAINING), PTHR11260:SF55()	KOG0867(Glutathione S-transferase)			GO:0005515(molecular_function: protein binding)	AT2G47730.1	glutathione S-transferase phi 8
Medtr1g026160	chr1	-	8448218	8453684	0.100164	0.076681	0.089678	0.392576	0.377523	0.182248	0.137045	0.399788	0.524966	0.302846	0.255198	0.171197	ACT-like tyrosine kinase family protein	PF01842(ACT domain), PF00069(Protein kinase domain)	PTHR23257:SF82(), PTHR23257(SERINE-THREONINE PROTEIN KINASE)	KOG0192(Tyrosine kinase specific for activated (GTP-bound) p21cdc42Hs)			GO:0004672(molecular_function: protein kinase activity), GO:0005524(molecular_function: ATP binding), GO:0006468(biological_process: protein phosphorylation), GO:0016597(molecular_function: amino acid binding), GO:0008152(biological_process: metabolic process)	AT4G38470.1	ACT-like protein tyrosine kinase family protein
Medtr1g026170	chr1	+	8455846	8461251	19.5182	20.0734	17.0644	18.6236	17.5424	18.4182	14.9588	20.3412	17.9258	25.7532	26.4263	21.4287	alpha amylase domain protein	PF00128(Alpha amylase, catalytic domain), PF07821(Alpha-amylase C-terminal beta-sheet domain)	PTHR10357:SF9(), PTHR10357(ALPHA-AMYLASE)	KOG0471(Alpha-amylase)			GO:0003824(molecular_function: catalytic activity), GO:0043169(molecular_function: cation binding), GO:0005975(biological_process: carbohydrate metabolic process), GO:0004556(molecular_function: alpha-amylase activity), GO:0005509(molecular_function: calcium ion binding)	AT1G76130.1	alpha-amylase-like 2
Medtr1g026240	chr1	-	8470474	8471409	0	0	0	0	0	0	0	0	0	0	0	0	hypothetical protein							AT1G36675.1	glycine-rich protein
Medtr1g026290	chr1	-	8515221	8526183	29.9447	31.1602	31.7263	24.8441	27.457	26.4832	24.3748	24.0788	26.7249	30.1157	24.2259	23.9046	scythe protein ubiquitin-like domain protein	PF00240(Ubiquitin family)	PTHR15204(SCYTHE/BAT3)	KOG0005(Ubiquitin-like protein)			GO:0005515(molecular_function: protein binding)	AT5G42220.1	Ubiquitin-like superfamily protein
Medtr1g026310	chr1	-	8532183	8535392	5.39613	6.87699	7.1358	6.33183	7.65619	8.02093	4.95205	5.66855	5.9063	4.81449	6.16253	6.07213	acyl:CoA ligase	PF00501(AMP-binding enzyme)	PTHR24096:SF43(), PTHR24096(FAMILY NOT NAMED)	KOG1176(Acyl-CoA synthetase)	6.2.1.-()	K10526(Lipid metabolism: alpha-Linolenic acid metabolism [PATH:ko00592]: OPCL1; OPC-8:0 CoA ligase 1)	GO:0003824(molecular_function: catalytic activity), GO:0008152(biological_process: metabolic process)	AT1G20510.1	OPC-8:0 CoA ligase1
Medtr1g026340	chr1	+	8543960	8546569	0.326667	0.164391	0.315634	0.302529	0.198336	0.293494	0.902101	0.824561	0.535405	0.033354	0.160508	0.113054	PPR containing plant-like protein	PF01535(PPR repeat)	PTHR24015(FAMILY NOT NAMED)					AT1G76280.3	Tetratricopeptide repeat (TPR)-like superfamily protein
Medtr1g026350	chr1	+	8547538	8548351	2.30452	2.56869	2.86063	2.58168	3.73006	3.1874	2.00777	2.79158	2.46895	2.50987	2.42139	3.05617	4-coumarate-CoA ligase-like protein	PF00501(AMP-binding enzyme)	PTHR24096(FAMILY NOT NAMED), PTHR24096:SF43()				GO:0003824(molecular_function: catalytic activity), GO:0008152(biological_process: metabolic process)	AT1G20510.2	OPC-8:0 CoA ligase1
Medtr1g026370	chr1	+	8552093	8555481	0.674854	0.497763	0.399386	1.08637	0.967667	0.774172	0.753465	0.930232	1.14682	1.12996	0.844163	1.08098	prolyl oligopeptidase-like protein	PF02897(Prolyl oligopeptidase, N-terminal beta-propeller domain), PF00326(Prolyl oligopeptidase family)	PTHR11757(PROTEASE FAMILY S9A OLIGOPEPTIDASE), PTHR11757:SF2(PROLYL ENDOPEPTIDASE)	KOG2237(Predicted serine protease)			GO:0008236(molecular_function: serine-type peptidase activity), GO:0006508(biological_process: proteolysis), GO:0004252(molecular_function: serine-type endopeptidase activity), GO:0070008(molecular_function: serine-type exopeptidase activity)	AT1G76140.1	Prolyl oligopeptidase family protein
Medtr1g026380	chr1	+	8556165	8560141	3.74826	3.8695	3.23023	12.2743	14.1853	16.5221	8.25725	12.408	7.52316	11.9488	9.95746	8.93194	prolyl oligopeptidase-like protein	PF02897(Prolyl oligopeptidase, N-terminal beta-propeller domain), PF00326(Prolyl oligopeptidase family)	PTHR11757(PROTEASE FAMILY S9A OLIGOPEPTIDASE), PTHR11757:SF2(PROLYL ENDOPEPTIDASE)	KOG2237(Predicted serine protease)	3.4.21.26(Prolyl oligopeptidase.)	K01322(Endocrine system: Renin-angiotensin system [PATH:ko04614]: PREP; prolyl oligopeptidase)	GO:0008236(molecular_function: serine-type peptidase activity), GO:0006508(biological_process: proteolysis), GO:0004252(molecular_function: serine-type endopeptidase activity), GO:0070008(molecular_function: serine-type exopeptidase activity)	AT1G76140.1	Prolyl oligopeptidase family protein
Medtr1g026400	chr1	-	8564269	8568905	15.02	13.842	15.1603	16.8383	20.8415	18.6258	15.5832	16.6482	17.944	15.4081	14.8904	13.6525	tRNA pseudouridine synthase Pus10, putative		PTHR21568(UNCHARACTERIZED)	KOG2364(Predicted pseudouridylate synthase)				AT1G20410.1	Pseudouridine synthase family protein
Medtr1g026410	chr1	-	8569956	8573184	0.516436	0.737406	4.9508	0.332686	0.621958	0.606724	1.27979	0.476146	0.21044	0.029105	0	0.022383	multi-copper oxidase-like protein	PF07731(Multicopper oxidase), PF00394(Multicopper oxidase), PF07732(Multicopper oxidase)	PTHR11709:SF11(SUBFAMILY NOT NAMED), PTHR11709(MULTI-COPPER OXIDASE)	KOG1263(Multicopper oxidases)			GO:0016491(molecular_function: oxidoreductase activity), GO:0055114(biological_process: oxidation-reduction process), GO:0005507(molecular_function: copper ion binding)	AT1G76160.1	SKU5 similar 5
Medtr1g026430	chr1	-	8578144	8600613	3.3666	4.22478	4.43397	4.19542	4.80668	5.21087	3.39774	3.90623	3.83814	3.55723	4.22692	4.16291	4-coumarate-CoA ligase-like protein	PF00501(AMP-binding enzyme)	PTHR24096(FAMILY NOT NAMED), PTHR24096:SF43()				GO:0003824(molecular_function: catalytic activity), GO:0008152(biological_process: metabolic process)	AT1G20510.1	OPC-8:0 CoA ligase1
Medtr1g026460	chr1	+	8609239	8611808	0.33951	0.161078	0.35727	0.316776	0.281197	0.343577	0.778381	0.831898	0.544508	0.071976	0.162977	0.117808	PPR containing plant-like protein	PF01535(PPR repeat)	PTHR24015(FAMILY NOT NAMED)					AT1G76280.3	Tetratricopeptide repeat (TPR)-like superfamily protein
Medtr1g026470	chr1	+	8612936	8614162	3.965	3.64298	4.55764	5.06927	4.99063	5.29327	4.23381	5.13156	5.49477	4.47462	4.78173	4.53389	4-coumarate-CoA ligase-like protein	PF00501(AMP-binding enzyme)	PTHR24096:SF43(), PTHR24096(FAMILY NOT NAMED)	KOG1176(Acyl-CoA synthetase)			GO:0003824(molecular_function: catalytic activity), GO:0008152(biological_process: metabolic process)	AT1G20510.1	OPC-8:0 CoA ligase1
Medtr1g026480	chr1	+	8614318	8616882	3.9769	2.40591	2.57234	5.46842	5.68103	5.2495	5.45104	5.23911	5.88245	5.93017	4.11831	5.25038	hypothetical protein							AT1G76280.3	Tetratricopeptide repeat (TPR)-like superfamily protein
Medtr1g026490	chr1	-	8617169	8631572	0.645442	0.750929	0.692999	0.830536	0.990141	1.00691	0.667637	0.908805	1.06778	0.802545	0.691853	0.45727	fanconi anemia group J-like protein	PF06733(DEAD_2)	PTHR11472(DNA REPAIR DEAD HELICASE RAD3/XP-D SUBFAMILY MEMBER), PTHR11472:SF6(FANCONI ANEMIA GROUP J PROTEIN)	KOG1132(Helicase of the DEAD superfamily)			GO:0003677(molecular_function: DNA binding), GO:0004003(molecular_function: ATP-dependent DNA helicase activity), GO:0005524(molecular_function: ATP binding)	AT1G20720.1	RAD3-like DNA-binding helicase protein
Medtr1g026510	chr1	-	8638640	8640774	4.14408	4.44252	4.03273	5.5983	5.12519	5.31935	5.58361	4.67287	6.27468	5.96493	5.47833	6.6346	phloem protein 2-B5	PF00646(F-box domain)					GO:0005515(molecular_function: protein binding)	AT5G24560.1	phloem protein 2-B12
Medtr1g026540	chr1	+	8655620	8658952	25.6686	27.2652	26.5608	29.8953	29.0679	29.6509	28.7084	27.861	29.9347	30.7054	30.1612	29.7868	3-beta-hydroxy-delta5-steroid dehydrogenase	PF01073(3-beta hydroxysteroid dehydrogenase/isomerase family)	PTHR10366(NAD DEPENDENT EPIMERASE/DEHYDRATASE), PTHR10366:SF20()	KOG1430(C-3 sterol dehydrogenase/3-beta-hydroxysteroid dehydrogenase and related dehydrogenases)			GO:0003854(molecular_function: 3-beta-hydroxy-delta5-steroid dehydrogenase activity), GO:0016616(molecular_function: oxidoreductase activity, acting on the CH-OH group of donors, NAD or NADP as acceptor), GO:0006694(biological_process: steroid biosynthetic process), GO:0055114(biological_process: oxidation-reduction process)	AT2G33630.1	NAD(P)-binding Rossmann-fold superfamily protein
Medtr1g026550	chr1	+	8659686	8663216	16.5582	12.9652	14.1493	17.2065	17.6561	19.8261	18.186	22.4075	19.6553	15.2055	15.1607	16.7261	light-harvesting complex I chlorophyll A/B-binding protein	PF00504(Chlorophyll A-B binding protein)	PTHR21649(CHLOROPHYLL A/B BINDING PROTEIN)					AT1G76570.1	Chlorophyll A-B binding family protein
Medtr1g026560	chr1	-	8665743	8668237	9.10706	7.53295	9.55268	9.09977	8.54924	7.15932	6.97087	6.86318	7.38419	6.53178	5.79264	6.32775	hydroxyproline-rich glycoprotein family protein, putative							AT1G76660.1
Medtr1g026590	chr1	-	8674827	8678076	22.2839	25.4735	25.7986	19.8178	22.3026	19.4159	22.0858	19.1076	20.7189	23.9173	20.123	20.5259	nucleotide/sugar transporter family protein	PF03151(Triose-phosphate Transporter family)	PTHR11132(SOLUTE CARRIER FAMILY 35)	KOG1441(Glucose-6-phosphate/phosphate and phosphoenolpyruvate/phosphate antiporter)				AT1G21070.1	Nucleotide-sugar transporter family protein
Medtr1g026620	chr1	+	8696867	8697397	0.070982	0.081673	0.023983	0.016506	0.036508	0.04007	0	0	0.054889	0	0.140477	0.110516	hypothetical protein
Medtr1g026650	chr1	+	8705461	8706179	0.335013	0.555631	1.64623	0.908803	1.08428	1.58771	0.507116	1.28386	0.466279	0.37007	0.817428	0.544398	transmembrane protein, putative
Medtr1g026700	chr1	+	8724014	8725020	0.259897	0.230074	0	0	0.138499	0	0.110991	0.12266	0	0	0	0	hypothetical protein
Medtr1g026710	chr1	-	8732791	8739654	0	0.02327	0	0.019313	0.05506	0.054977	0.024364	0.029959	0	0	0	0	D-arabinono-1,4-lactone oxidase family protein	PF04030(D-arabinono-1,4-lactone oxidase )	PTHR13878:SF10(), PTHR13878(GULONOLACTONE OXIDASE)	KOG4730(D-arabinono-1, 4-lactone oxidase)			GO:0003885(molecular_function: D-arabinono-1,4-lactone oxidase activity), GO:0055114(biological_process: oxidation-reduction process), GO:0016020(cellular_component: membrane)	AT5G11540.1	D-arabinono-1,4-lactone oxidase family protein
Medtr1g026740	chr1	-	8747237	8751027	0.691079	0.544018	0.620412	0.406219	0.277528	0.609992	0.121948	0.314417	0.166239	0.162931	0.380639	0.151185	peptide/nitrate transporter plant	PF00854(POT family)	PTHR11654:SF57(), PTHR11654(OLIGOPEPTIDE TRANSPORTER-RELATED)	KOG1237(H+/oligopeptide symporter)			GO:0005215(molecular_function: transporter activity), GO:0006810(biological_process: transport), GO:0016020(cellular_component: membrane)	AT1G52190.1	Major facilitator superfamily protein
Medtr1g026750	chr1	-	8754653	8759408	0	0	0	0	0	0.001401	0	0	0	0	0.032313	0	peptide/nitrate transporter plant	PF00854(POT family)	PTHR11654:SF57(), PTHR11654(OLIGOPEPTIDE TRANSPORTER-RELATED)	KOG1237(H+/oligopeptide symporter)			GO:0005215(molecular_function: transporter activity), GO:0006810(biological_process: transport), GO:0016020(cellular_component: membrane)	AT1G52190.1	Major facilitator superfamily protein
Medtr1g026760	chr1	+	8764037	8764931	0.362442	0.224332	0.590917	0.432627	0.125816	0.251672	0.305278	0.302435	0.612342	0.19855	0.422387	0.316701	hypothetical protein
Medtr1g026770	chr1	-	8765192	8767747	0	0	0	0	0	0	0	0	0	0	0	0	peptide/nitrate transporter plant	PF00854(POT family)	PTHR11654(OLIGOPEPTIDE TRANSPORTER-RELATED), PTHR11654:SF57()	KOG1237(H+/oligopeptide symporter)			GO:0005215(molecular_function: transporter activity), GO:0006810(biological_process: transport), GO:0016020(cellular_component: membrane)	AT1G52190.1	Major facilitator superfamily protein
Medtr1g026790	chr1	+	8773712	8778014	0.269455	0.097174	0.144513	0.17574	0.249026	0.274131	0.281825	0.379414	0.25583	0.446649	0.295974	0.19017	hypothetical protein							AT1G21560.2
Medtr1g026800	chr1	+	8780008	8784725	0.474583	0.162857	0.283097	0.234771	0.193652	0.407349	0.269693	0.359305	0.566322	0.29508	0.105741	0.288605	hypothetical protein							AT1G77270.1
Medtr1g026810	chr1	+	8786144	8790973	3.26003	3.07208	3.34713	4.24829	5.06396	4.22024	3.63433	3.79752	4.1616	4.9262	4.54119	4.88281	hypothetical protein							AT1G21560.2
Medtr1g026820	chr1	-	8791012	8792717	1263.86	1061.52	1697.91	737.093	599.818	753.969	1313.68	1282.93	991.884	470.199	428.989	254.153	photosystem I reaction center subunit X psaK	PF01241(Photosystem I psaG / psaK)					GO:0015979(biological_process: photosynthesis), GO:0009522(cellular_component: photosystem I), GO:0016020(cellular_component: membrane)	AT1G30380.1	photosystem I subunit K
Medtr1g026830	chr1	+	8797246	8799070	0.657985	0.518295	0.937585	0.745054	0.876214	0.836659	1.06408	1.35241	0.805045	0.634755	0.327703	0.768469	DEAD-box ATP-dependent RNA helicase	PF00271(Helicase conserved C-terminal domain), PF00270(DEAD/DEAH box helicase)	PTHR24031:SF46(), PTHR24031(RNA HELICASE)	KOG0341(DEAD-box protein abstrakt)	3.6.4.13(RNA helicase.)	K13116(Transcription: Spliceosome [BR:ko03041]: DDX41, ABS; ATP-dependent RNA helicase DDX41)	GO:0003676(molecular_function: nucleic acid binding), GO:0005524(molecular_function: ATP binding), GO:0008026(molecular_function: ATP-dependent helicase activity), GO:0004386(molecular_function: helicase activity)	AT5G51280.1	DEAD-box protein abstrakt, putative
Medtr1g026840	chr1	-	8799978	8810775	26.0966	28.1064	25.7333	20.8721	23.4514	22.2433	19.9451	18.552	21.6816	26.0364	24.8939	27.9391	ENTH/VHS/GAT family protein	PF03127(GAT domain), PF00790(VHS domain)	PTHR13856(VHS DOMAIN CONTAINING PROTEIN FAMILY), PTHR13856:SF27()	KOG1087(Cytosolic sorting protein GGA2/TOM1)			GO:0006886(biological_process: intracellular protein transport), GO:0005622(cellular_component: intracellular)	AT4G32760.2	ENTH/VHS/GAT family protein
Medtr1g026850	chr1	+	8813545	8814639	0	0	0	0	0	0	0	0	0	0	0	0	F-box SKIP23-like protein	PF03478(Protein of unknown function (DUF295))						AT2G17030.1	F-box family protein with a domain of unknown function (DUF295)
Medtr1g026860	chr1	-	8815529	8818802	1.30761	1.35662	1.28632	1.94034	2.14679	2.17944	1.90975	1.70217	2.03989	1.73671	2.16742	2.01493	branched-chain-amino-acid aminotransferase-like protein	PF01063(Amino-transferase class IV)	PTHR11825(SUBGROUP IIII AMINOTRANSFERASE), PTHR11825:SF6()	KOG0975(Branched chain aminotransferase BCAT1, pyridoxal phosphate enzymes type IV superfamily)	2.6.1.42(Branched-chain-amino-acid transaminase.)	K00826(Metabolism of cofactors and vitamins: Pantothenate and CoA biosynthesis [PATH:ko00770]: E2.6.1.42, ilvE; branched-chain amino acid aminotransferase)	GO:0003824(molecular_function: catalytic activity), GO:0008152(biological_process: metabolic process)	AT5G57850.1	D-aminoacid aminotransferase-like PLP-dependent enzymes superfamily protein
Medtr1g026870	chr1	-	8820780	8826887	4.47741	4.37896	4.76133	2.44708	2.54671	3.18817	2.27404	2.41385	3.43685	2.25019	2.54175	2.87573	transcription repressor MYB5	PF00249(Myb-like DNA-binding domain)	PTHR10641(MYB-LIKE DNA-BINDING PROTEIN MYB)	KOG0048(Transcription factor, Myb superfamily)			GO:0003682(molecular_function: chromatin binding)	AT4G32730.1	Homeodomain-like protein
Medtr1g026880	chr1	+	8827503	8827712	1.03331	1.5565	1.35288	0.928786	0.333371	0.772465	0.860133	0.316637	2.61796	0.557943	0.934731	0.373131	hypothetical protein
Medtr1g026890	chr1	-	8830191	8835899	21.9179	23.284	19.1379	23.4994	21.0306	18.6401	22.2721	19.8749	19.1866	23.9134	22.0135	17.1826	RNA recognition motif protein	PF00076(RNA recognition motif. (a.k.a. RRM, RBD, or RNP domain)), PF05383(La domain), PF08777(RNA binding motif)	PTHR22792(LUPUS LA PROTEIN-RELATED), PTHR22792:SF4()	KOG4213(RNA-binding protein La)		K11090(Immune diseases: Systemic lupus erythematosus [PATH:ko05322]: LA, SSB; lupus La protein)	GO:0003676(molecular_function: nucleic acid binding)	AT4G32720.2	La protein 1
Medtr1g026910	chr1	-	8839537	8844393	25.0517	22.5879	28.4682	70.296	59.2615	56.154	62.3711	50.0501	41.0587	47.1965	37.3958	30.5466	sulfite exporter TauE/SafE family protein	PF01925(Sulfite exporter TauE/SafE)	PTHR14255(ATP-DEPENDENT PROTEASE CEREBLON)				GO:0016021(cellular_component: integral component of membrane)	AT2G25737.1	Sulfite exporter TauE/SafE family protein
Medtr1g026920	chr1	+	8852374	8858380	7.69962	8.09843	6.94832	8.01012	7.84928	7.35159	6.1645	7.76991	5.84766	8.8047	8.66625	9.07092	Got1/SFT2-like vescicle transporter family protein	PF04178(Got1/Sft2-like family )	PTHR23137(UNCHARACTERIZED)				GO:0016192(biological_process: vesicle-mediated transport)	AT5G24170.1	Got1/Sft2-like vescicle transport protein family
Medtr1g026940	chr1	-	8861130	8863132	6.10555	7.95559	5.06231	5.47869	5.08593	6.42399	3.81533	3.5233	3.37558	5.78669	7.54398	5.9443	receptor-like kinase	PF07714(Protein tyrosine kinase)	PTHR24420(), PTHR24420:SF441()	KOG1187(Serine/threonine protein kinase)			GO:0004672(molecular_function: protein kinase activity), GO:0006468(biological_process: protein phosphorylation)	AT1G66980.1	suppressor of npr1-1 constitutive 4
Medtr1g026950	chr1	+	8863692	8864675	6.66347	7.34238	4.7647	3.46989	4.33302	4.81389	5.1077	2.7734	3.48991	4.41853	4.65555	3.93513	wall-associated receptor kinase galacturonan-binding protein							AT5G38260.1	Protein kinase superfamily protein
Medtr1g026960	chr1	-	8866235	8866972	0.067688	0.213771	0.027417	0.01188	0.296022	0.215733	0.1065	0.008381	0.02854	0	0.008375	0.203394	hypothetical protein							AT5G53110.1	RING/U-box superfamily protein
Medtr1g026970	chr1	+	8867990	8869729	0.958071	0.93327	0.813282	1.43391	1.83163	1.80192	1.705	1.47156	1.66054	3.06634	3.20318	2.65168	wall-associated receptor kinase galacturonan-binding protein							AT1G18390.2	Protein kinase superfamily protein
Medtr1g026990	chr1	+	8873569	8874561	8.46501	9.71243	6.09894	7.72435	8.19982	7.93657	8.26908	6.7291	9.29727	10.3669	12.5037	9.9023	stress-induced receptor-like kinase	PF00069(Protein kinase domain)	PTHR24420(), PTHR24420:SF441()	KOG1187(Serine/threonine protein kinase)			GO:0004672(molecular_function: protein kinase activity), GO:0005524(molecular_function: ATP binding), GO:0006468(biological_process: protein phosphorylation)	AT5G38280.1	PR5-like receptor kinase
MT4Noble_001289	chr1	+	8886622	8886771	0	0	0	0	0	0	0	0	0	0	0	0
Medtr1g027020	chr1	+	8906141	8918572	80.1817	79.384	93.2786	73.3918	94.5314	94.564	90.5449	64.607	77.2392	24.8307	28.8777	30.1655	NADH glutamate synthase	PF07992(Pyridine nucleotide-disulphide oxidoreductase), PF04898(Glutamate synthase central domain), PF01493(GXGXG motif), PF01645(Conserved region in glutamate synthase), PF00070(Pyridine nucleotide-disulphide oxidoreductase), PF00310(Glutamine amidotransferases class-II)	PTHR11938:SF1(PROTEIN W07E11.1, ISOFORM B), PTHR11938(FAD NADPH DEHYDROGENASE/OXIDOREDUCTASE)	KOG0399(Glutamate synthase)	1.4.1.13(Glutamate synthase (NADPH).), 1.4.1.14(Glutamate synthase (NADH).)	K00264(Amino acid metabolism: Alanine, aspartate and glutamate metabolism [PATH:ko00250]: GLT1; glutamate synthase (NADPH/NADH))	GO:0016491(molecular_function: oxidoreductase activity), GO:0050660(molecular_function: flavin adenine dinucleotide binding), GO:0055114(biological_process: oxidation-reduction process), GO:0008152(biological_process: metabolic process), GO:0015930(molecular_function: glutamate synthase activity), GO:0016638(molecular_function: oxidoreductase activity, acting on the CH-NH2 group of donors), GO:00…	AT5G53460.1	NADH-dependent glutamate synthase 1
Medtr1g027030	chr1	-	8920173	8925104	2.87401	3.39868	2.57679	3.05789	5.28096	4.39752	2.82432	3.19238	3.70809	4.45687	5.65941	4.3093	stress-induced receptor-like kinase	PF00069(Protein kinase domain)	PTHR24420(), PTHR24420:SF441()	KOG1187(Serine/threonine protein kinase)			GO:0004672(molecular_function: protein kinase activity), GO:0005524(molecular_function: ATP binding), GO:0006468(biological_process: protein phosphorylation)	AT1G67000.1	Protein kinase superfamily protein
Medtr1g027040	chr1	+	8925788	8927830	9.86855	9.08679	7.27597	9.78835	12.5214	9.32491	6.80505	6.81954	7.30446	10.9681	12.8812	12.4736	receptor-like kinase	PF07714(Protein tyrosine kinase)	PTHR24420(), PTHR24420:SF441()	KOG1187(Serine/threonine protein kinase)			GO:0004672(molecular_function: protein kinase activity), GO:0006468(biological_process: protein phosphorylation)	AT5G39020.1	Malectin/receptor-like protein kinase family protein
Medtr1g027050	chr1	-	8931485	8936674	1.34522	2.35056	1.42945	1.2171	2.17969	1.35556	0.862016	1.37357	1.49946	1.80906	3.04236	1.93871	stress-induced receptor-like kinase	PF00069(Protein kinase domain)	PTHR24420(), PTHR24420:SF441()	KOG1187(Serine/threonine protein kinase)			GO:0004672(molecular_function: protein kinase activity), GO:0005524(molecular_function: ATP binding), GO:0006468(biological_process: protein phosphorylation)	AT5G38260.1	Protein kinase superfamily protein
MT4Noble_001295	chr1	-	8934493	8934600	0	0	0	0.081181	0	0	0	0	0	0	0.112729	0
Medtr1g027060	chr1	+	8938282	8940101	7.54213	4.41756	2.05433	5.52135	7.97788	6.27433	4.07861	3.72709	3.35141	5.80433	7.84788	7.72538	receptor-like kinase	PF07714(Protein tyrosine kinase)	PTHR24420(), PTHR24420:SF441()	KOG1187(Serine/threonine protein kinase)			GO:0004672(molecular_function: protein kinase activity), GO:0006468(biological_process: protein phosphorylation)	AT1G66980.1	suppressor of npr1-1 constitutive 4
Medtr1g027070	chr1	-	8941424	8946260	3.19375	4.20824	3.64544	5.70173	5.83958	4.26777	5.13129	5.13713	6.16637	8.59878	10.7612	11.0986	stress-induced receptor-like kinase	PF00069(Protein kinase domain)	PTHR24420(), PTHR24420:SF441()	KOG1187(Serine/threonine protein kinase)			GO:0004672(molecular_function: protein kinase activity), GO:0005524(molecular_function: ATP binding), GO:0006468(biological_process: protein phosphorylation)	AT1G67000.1	Protein kinase superfamily protein
Medtr1g027140	chr1	-	8955613	8960288	0.854761	0.96803	0.882846	0.976814	1.18689	0.771429	0.786291	0.817947	0.816945	0.818806	1.13393	1.1477	stress-induced receptor-like kinase	PF00069(Protein kinase domain)	PTHR24420:SF441(), PTHR24420()	KOG1187(Serine/threonine protein kinase)			GO:0004672(molecular_function: protein kinase activity), GO:0005524(molecular_function: ATP binding), GO:0006468(biological_process: protein phosphorylation)	AT5G38260.1	Protein kinase superfamily protein
Medtr1g027150	chr1	+	8961183	8963268	0.515015	0.491134	0.481369	1.70088	1.7372	1.03149	1.2726	1.47261	1.46949	1.63357	3.94414	2.3087	receptor-like kinase	PF07714(Protein tyrosine kinase)	PTHR24420:SF441(), PTHR24420()	KOG1187(Serine/threonine protein kinase)			GO:0004672(molecular_function: protein kinase activity), GO:0006468(biological_process: protein phosphorylation)	AT1G67000.1	Protein kinase superfamily protein
Medtr1g027160	chr1	-	8964033	8965121	0.189973	0.03809	0	0.491459	0.300003	0.318498	0.639834	0.34818	0.605356	1.25808	1.90812	2.12041	stress-induced receptor-like kinase	PF00069(Protein kinase domain)	PTHR24420:SF441(), PTHR24420()	KOG1187(Serine/threonine protein kinase)			GO:0004672(molecular_function: protein kinase activity), GO:0005524(molecular_function: ATP binding), GO:0006468(biological_process: protein phosphorylation)	AT1G66980.1	suppressor of npr1-1 constitutive 4
Medtr1g027170	chr1	-	8965928	8967588	0.089782	0.056667	0	0.278234	0.533977	0.255908	0.388301	0.442181	1.00645	0.939621	1.04121	0.904446	transmembrane protein, putative
Medtr1g027180	chr1	-	8968312	8972633	0	0.072248	0	0.062617	0	0	0.020031	0.027166	0.017313	0	0.020924	0	wall-associated receptor kinase galacturonan-binding protein							AT5G38260.1	Protein kinase superfamily protein
Medtr1g027250	chr1	-	8999283	9000272	0	0	0	0.00231	0.002173	0	0	0	0	0	0	0	stress-induced receptor-like kinase	PF00069(Protein kinase domain)	PTHR24420(), PTHR24420:SF441()	KOG1187(Serine/threonine protein kinase)			GO:0004672(molecular_function: protein kinase activity), GO:0005524(molecular_function: ATP binding), GO:0006468(biological_process: protein phosphorylation)	AT4G18250.1	receptor serine/threonine kinase, putative
Medtr1g027280	chr1	+	9024165	9025409	0	0	0	0	0	0	0	0	0	0	0	0	hypothetical protein							AT3G21000.1	Gag-Pol-related retrotransposon family protein
Medtr1g027290	chr1	+	9029037	9031813	0	0.039718	0.046504	0.068391	0	0	0	0.043359	0	0	0.054538	0	flavonol synthase/flavanone 3-hydroxylase	PF03171(2OG-Fe(II) oxygenase superfamily)	PTHR10209(OXIDOREDUCTASE, 2OG-FE II OXYGENASE FAMILY PROTEIN), PTHR10209:SF55()	KOG0143(Iron/ascorbate family oxidoreductases)			GO:0016491(molecular_function: oxidoreductase activity), GO:0016706(molecular_function: oxidoreductase activity, acting on paired donors, with incorporation or reduction of molecular oxygen, 2-oxoglutarate as one donor, and incorporation of one atom each of oxygen into both donors), GO:0055114(biological_process: oxidation-reduction process)	AT2G36690.1	2-oxoglutarate (2OG) and Fe(II)-dependent oxygenase superfamily protein
Medtr1g027310	chr1	+	9037367	9048661	0	0	0	0	0	0	0	0	0	0	0	0	leucoanthocyanidin dioxygenase-like protein	PF03171(2OG-Fe(II) oxygenase superfamily)	PTHR10209(OXIDOREDUCTASE, 2OG-FE II OXYGENASE FAMILY PROTEIN), PTHR10209:SF55()	KOG0143(Iron/ascorbate family oxidoreductases)			GO:0016491(molecular_function: oxidoreductase activity), GO:0016706(molecular_function: oxidoreductase activity, acting on paired donors, with incorporation or reduction of molecular oxygen, 2-oxoglutarate as one donor, and incorporation of one atom each of oxygen into both donors), GO:0055114(biological_process: oxidation-reduction process)	AT2G36690.1	2-oxoglutarate (2OG) and Fe(II)-dependent oxygenase superfamily protein
Medtr1g027430	chr1	+	9087900	9088203	0.018574	0	0.044736	0	0	0.019124	0	0	0	0	0	0	hypothetical protein
Medtr1g027440	chr1	+	9093133	9097307	0	0	0	0	0	0	0	0	0	0	0	0	stress-induced receptor-like kinase	PF00069(Protein kinase domain)	PTHR24420(), PTHR24420:SF441()	KOG1187(Serine/threonine protein kinase)			GO:0004672(molecular_function: protein kinase activity), GO:0005524(molecular_function: ATP binding), GO:0006468(biological_process: protein phosphorylation)	AT5G39020.1	Malectin/receptor-like protein kinase family protein
Medtr1g027460	chr1	+	9104350	9105569	0	0	0	0	0	0	0	0	0	0	0	0.004097	stress-induced receptor-like kinase	PF00069(Protein kinase domain)	PTHR24420(), PTHR24420:SF441()	KOG1187(Serine/threonine protein kinase)			GO:0004672(molecular_function: protein kinase activity), GO:0005524(molecular_function: ATP binding), GO:0006468(biological_process: protein phosphorylation)	AT5G38280.1	PR5-like receptor kinase
Medtr1g027490	chr1	+	9113969	9119222	0	0	0	0	0	0	0	0	0	0	0	0	wall-associated receptor kinase-like protein	PF07645(Calcium-binding EGF domain), PF00069(Protein kinase domain)	PTHR24420:SF444(), PTHR24420()	KOG1187(Serine/threonine protein kinase)			GO:0004672(molecular_function: protein kinase activity), GO:0005524(molecular_function: ATP binding), GO:0006468(biological_process: protein phosphorylation), GO:0005509(molecular_function: calcium ion binding)	AT1G21270.1	wall-associated kinase 2
Medtr1g027500	chr1	-	9124774	9126693	0.022568	0.042861	0	0.04132	0.052472	0	0.020277	0	0.049661	0.231368	0.086432	0.727984	receptor-like kinase	PF00069(Protein kinase domain)	PTHR24420(), PTHR24420:SF441()	KOG1187(Serine/threonine protein kinase)			GO:0004672(molecular_function: protein kinase activity), GO:0005524(molecular_function: ATP binding), GO:0006468(biological_process: protein phosphorylation)	AT1G66980.1	suppressor of npr1-1 constitutive 4
Medtr1g027520	chr1	+	9136186	9137143	0	0.002053	0.065804	0.038583	0.051147	0.061434	0.13975	0.077005	0.020333	0.318798	0.14509	0.677121	wall-associated receptor kinase galacturonan-binding protein							AT1G66880.1	Protein kinase superfamily protein
MT4Noble_001326	chr1	-	9136591	9141139	0	0.075673	0.03183	0.029287	0	0	0	0	0.035294	0.115512	0	0.076099	DUF4283 domain protein
Medtr1g027540	chr1	+	9142061	9143565	0.079918	0.045477	0	0.050319	0.188377	0.109378	0.08466	0.12299	0.015323	0.527216	0.330549	0.527612	stress-induced receptor-like kinase	PF00069(Protein kinase domain)	PTHR24420(), PTHR24420:SF441()	KOG1187(Serine/threonine protein kinase)			GO:0004672(molecular_function: protein kinase activity), GO:0005524(molecular_function: ATP binding), GO:0006468(biological_process: protein phosphorylation)	AT5G39020.1	Malectin/receptor-like protein kinase family protein
MT4Noble_001330	chr1	+	9152405	9153702	0	0	0	0.008266	0	0	0	0	0	0	0	0	Stress-induced receptor-like kinase | PF07714 Protein tyrosine kinase
Medtr1g027570	chr1	-	9155270	9158538	0.00093	0.002042	0	0.001706	0.001629	0.002333	0	0.001038	0.020567	0.005788	0.002933	0	wall-associated receptor kinase-like protein	PF07645(Calcium-binding EGF domain), PF00069(Protein kinase domain), PF08488(Wall-associated kinase)	PTHR24420(), PTHR24420:SF444()	KOG1187(Serine/threonine protein kinase)			GO:0004672(molecular_function: protein kinase activity), GO:0005524(molecular_function: ATP binding), GO:0006468(biological_process: protein phosphorylation), GO:0005509(molecular_function: calcium ion binding), GO:0004674(molecular_function: protein serine/threonine kinase activity), GO:0016021(cellular_component: integral component of membrane)	AT1G21270.1	wall-associated kinase 2
Medtr1g027580	chr1	-	9161150	9164653	0.040146	0.024403	0	0.052808	0.079335	0.02207	0.023617	0.033219	0.040554	0.010578	0.536339	0.186444	wall-associated receptor kinase-like protein	PF07645(Calcium-binding EGF domain), PF00069(Protein kinase domain)	PTHR24420(), PTHR24420:SF444()	KOG1187(Serine/threonine protein kinase)			GO:0004672(molecular_function: protein kinase activity), GO:0005524(molecular_function: ATP binding), GO:0006468(biological_process: protein phosphorylation), GO:0005509(molecular_function: calcium ion binding)	AT1G21270.1	wall-associated kinase 2
Medtr1g027600	chr1	-	9170008	9176510	17.3618	19.6919	10.7804	14.2447	17.3409	15.5336	11.9892	12.5608	13.7154	15.3841	20.0001	15.7954	wall-associated receptor kinase-like protein	PF07645(Calcium-binding EGF domain), PF00069(Protein kinase domain), PF08488(Wall-associated kinase)	PTHR24420(), PTHR24420:SF444()	KOG1187(Serine/threonine protein kinase)			GO:0004672(molecular_function: protein kinase activity), GO:0005524(molecular_function: ATP binding), GO:0006468(biological_process: protein phosphorylation), GO:0005509(molecular_function: calcium ion binding), GO:0004674(molecular_function: protein serine/threonine kinase activity), GO:0016021(cellular_component: integral component of membrane)	AT1G21240.1	wall associated kinase 3
Medtr1g027610	chr1	-	9178905	9179550	7.60267	6.49259	4.47186	7.3275	7.18101	6.64975	4.26546	4.48086	6.61467	3.12858	9.23625	5.57632	wall associated kinase-like protein	PF07645(Calcium-binding EGF domain)	PTHR24420:SF444(), PTHR24420()				GO:0005509(molecular_function: calcium ion binding)	AT1G21240.1	wall associated kinase 3
Medtr1g027630	chr1	-	9198246	9199202	0	0.026337	0	0	0	0	0.064582	0	0	0	0	0	hypothetical protein
Medtr1g027640	chr1	-	9199322	9203571	8.95173	11.7595	7.12594	8.02163	11.2501	7.73689	4.8361	5.89733	7.07488	7.73303	9.29852	8.25718	wall-associated receptor kinase-like protein	PF07645(Calcium-binding EGF domain), PF08488(Wall-associated kinase), PF00069(Protein kinase domain)	PTHR24420(), PTHR24420:SF444()	KOG1187(Serine/threonine protein kinase)			GO:0004672(molecular_function: protein kinase activity), GO:0005524(molecular_function: ATP binding), GO:0006468(biological_process: protein phosphorylation), GO:0005509(molecular_function: calcium ion binding), GO:0004674(molecular_function: protein serine/threonine kinase activity), GO:0016021(cellular_component: integral component of membrane)	AT1G21240.1	wall associated kinase 3
Medtr1g027650	chr1	-	9210341	9210656	0	0.028248	0	0	0	0	0	0	0	0	0	0	transmembrane protein, putative
Medtr1g027660	chr1	-	9218091	9220934	0.004574	0.006969	0.005666	0.01754	0.002178	0.002115	0.001009	0	0.004756	0.003205	0.060272	0.003834	wall-associated receptor kinase-like protein	PF07645(Calcium-binding EGF domain), PF08488(Wall-associated kinase), PF00069(Protein kinase domain)	PTHR24420(), PTHR24420:SF444()	KOG1187(Serine/threonine protein kinase)			GO:0004672(molecular_function: protein kinase activity), GO:0005524(molecular_function: ATP binding), GO:0006468(biological_process: protein phosphorylation), GO:0005509(molecular_function: calcium ion binding), GO:0004674(molecular_function: protein serine/threonine kinase activity), GO:0016021(cellular_component: integral component of membrane)	AT1G21270.1	wall-associated kinase 2
Medtr1g027680	chr1	+	9231851	9234544	0.294495	0.336013	0.274367	0.397764	0.548579	0.331969	0.461463	0.139783	0.219515	0.574744	0.77407	0.612036	stress-induced receptor-like kinase	PF00069(Protein kinase domain)	PTHR24420(), PTHR24420:SF441()	KOG1187(Serine/threonine protein kinase)			GO:0004672(molecular_function: protein kinase activity), GO:0005524(molecular_function: ATP binding), GO:0006468(biological_process: protein phosphorylation)	AT1G66910.1	Protein kinase superfamily protein
Medtr1g027690	chr1	-	9235498	9237903	0.004883	0.132098	0.032563	0.074465	0.045447	0	0.17694	0.105875	0.045453	0.029459	0.099738	0.115185	receptor-like kinase	PF00069(Protein kinase domain)	PTHR24420:SF441(), PTHR24420()	KOG1187(Serine/threonine protein kinase)			GO:0004672(molecular_function: protein kinase activity), GO:0005524(molecular_function: ATP binding), GO:0006468(biological_process: protein phosphorylation)	AT1G66980.1	suppressor of npr1-1 constitutive 4
Medtr1g027700	chr1	-	9241923	9242966	2.85088	3.5588	2.91575	1.60706	1.37534	1.94246	2.09592	1.73581	1.99542	2.1777	1.76054	0.968697	malectin/receptor-like kinase family protein	PF07714(Protein tyrosine kinase)	PTHR24420(), PTHR24420:SF441()	KOG1187(Serine/threonine protein kinase)			GO:0004672(molecular_function: protein kinase activity), GO:0006468(biological_process: protein phosphorylation)	AT1G70250.1	receptor serine/threonine kinase, putative
MT4Noble_001343	chr1	+	9243357	9243467	5.47028	4.21405	1.9454	1.41603	0.984072	1.41571	1.39883	2.63439	3.31439	1.49902	1.12719	1.70671
Medtr1g027710	chr1	+	9244844	9246067	0.95995	1.65808	1.2634	1.09459	1.32822	0.919885	1.55522	1.11505	1.42297	2.05733	0.827714	1.29023	wall-associated receptor kinase galacturonan-binding protein							AT1G67025.1
Medtr1g027720	chr1	-	9247832	9249056	0.056087	0.043456	0.03475	0	0.074082	0	0.031526	0.053755	0.019766	0.041069	0	0	hypothetical protein
Medtr1g027730	chr1	+	9254451	9255677	0.101638	0.195062	0.164027	0.062135	0	0.037024	0.091625	0.1961	0.38842	0.21207	0.165474	0.203147	stress-induced receptor-like kinase	PF00069(Protein kinase domain)	PTHR24420(), PTHR24420:SF441()	KOG1187(Serine/threonine protein kinase)			GO:0004672(molecular_function: protein kinase activity), GO:0005524(molecular_function: ATP binding), GO:0006468(biological_process: protein phosphorylation)	AT1G66980.1	suppressor of npr1-1 constitutive 4
Medtr1g027740	chr1	-	9257285	9258745	0	0.039999	0	0	0	0	0	0	0	0	0	0	Serine/Threonine kinase domain protein	PF00069(Protein kinase domain)	PTHR24420(), PTHR24420:SF441()				GO:0004672(molecular_function: protein kinase activity), GO:0005524(molecular_function: ATP binding), GO:0006468(biological_process: protein phosphorylation)	AT4G18250.1	receptor serine/threonine kinase, putative
Medtr1g027820	chr1	+	9298986	9300905	32.2683	40.664	20.7901	29.7701	40.4149	45.8346	23.8617	23.188	26.0765	26.466	37.2019	28.4017	receptor-like kinase	PF07714(Protein tyrosine kinase)	PTHR24420(), PTHR24420:SF441()	KOG1187(Serine/threonine protein kinase)			GO:0004672(molecular_function: protein kinase activity), GO:0006468(biological_process: protein phosphorylation)	AT1G66910.1	Protein kinase superfamily protein
Medtr1g027830	chr1	+	9306621	9319054	7.92922	8.67036	9.8082	5.21788	4.79695	7.82256	5.05201	5.197	4.36225	4.53754	5.12416	4.60057	stress-induced receptor-like kinase	PF00069(Protein kinase domain)	PTHR24420(), PTHR24420:SF441()	KOG1187(Serine/threonine protein kinase)			GO:0004672(molecular_function: protein kinase activity), GO:0005524(molecular_function: ATP binding), GO:0006468(biological_process: protein phosphorylation)	AT1G66920.2	Protein kinase superfamily protein
Medtr1g027840	chr1	-	9319519	9320589	6.47713	8.77734	7.67179	6.55321	6.38392	8.17534	5.10095	5.84443	5.93881	7.74865	6.89719	6.56808	stress-induced receptor-like kinase	PF00069(Protein kinase domain)	PTHR24420(), PTHR24420:SF441()	KOG1187(Serine/threonine protein kinase)			GO:0004672(molecular_function: protein kinase activity), GO:0005524(molecular_function: ATP binding), GO:0006468(biological_process: protein phosphorylation)	AT5G38280.1	PR5-like receptor kinase
Medtr1g027850	chr1	+	9323590	9326542	4.15701	4.09232	3.87595	4.10541	4.00451	3.15356	4.88269	6.31429	6.27205	5.521	3.77076	6.90236	hypothetical protein
Medtr1g027860	chr1	-	9324033	9327037	0.876127	0.500574	0.82818	0.776224	0.849375	1.06468	0.704691	0.622192	0.917821	1.31849	0.774896	0.70988	hypothetical protein
Medtr1g027870	chr1	+	9331280	9331929	2.01416	1.84181	0.455354	0.844514	1.471	0.955713	0.875998	0.6394	1.00889	0.674422	0.079115	0.816814	hypothetical protein
Medtr1g027880	chr1	-	9334937	9335884	10.0484	10.8526	9.00378	8.21789	8.96265	7.86433	4.30694	4.85563	5.00949	7.11736	8.38917	5.99287	wall-associated receptor kinase galacturonan-binding protein							AT5G38260.1	Protein kinase superfamily protein
Medtr1g027890	chr1	+	9336833	9338259	13.2689	13.2967	8.25365	10.6833	13.6059	10.1143	6.9948	7.32299	8.14222	11.7954	12.9489	10.2428	receptor-like kinase	PF00069(Protein kinase domain)	PTHR24420(), PTHR24420:SF441()	KOG1187(Serine/threonine protein kinase)			GO:0004672(molecular_function: protein kinase activity), GO:0005524(molecular_function: ATP binding), GO:0006468(biological_process: protein phosphorylation)	AT1G70250.1	receptor serine/threonine kinase, putative
Medtr1g027920	chr1	+	9348454	9348937	4.38143	5.33331	5.90142	2.34878	3.32566	4.46298	4.70852	1.53283	4.78507	4.39976	3.03343	3.96234	stress-induced receptor-like kinase		PTHR24420:SF441(), PTHR24420()					AT5G38280.1	PR5-like receptor kinase
Medtr1g027930	chr1	-	9349830	9350828	40.4591	41.7913	39.1123	32.5614	35.9782	46.8743	34.0675	32.2706	36.2997	33.7692	37.1864	31.0993	stress-induced receptor-like kinase	PF00069(Protein kinase domain)	PTHR24420(), PTHR24420:SF441()	KOG1187(Serine/threonine protein kinase)			GO:0004672(molecular_function: protein kinase activity), GO:0005524(molecular_function: ATP binding), GO:0006468(biological_process: protein phosphorylation)	AT5G38280.1	PR5-like receptor kinase
Medtr1g027940	chr1	+	9355680	9356555	7.30916	8.14284	5.12134	4.48831	5.31419	5.67607	3.76381	3.82496	5.10727	4.06687	4.48163	4.18679	hypothetical protein
Medtr1g027950	chr1	-	9357358	9359668	72.5876	84.5038	62.1879	47.9597	54.8226	69.3382	51.3836	47.3888	47.9146	44.3792	50.9353	43.9809	wall-associated receptor kinase galacturonan-binding protein							AT1G18390.2	Protein kinase superfamily protein
Medtr1g027960	chr1	+	9363272	9365121	51.6806	57.4774	40.3913	31.7128	35.0516	41.8668	31.0516	30.2647	32.7797	38.9653	46.2828	38.7288	receptor-like kinase	PF00069(Protein kinase domain)	PTHR24420(), PTHR24420:SF441()	KOG1187(Serine/threonine protein kinase)			GO:0004672(molecular_function: protein kinase activity), GO:0005524(molecular_function: ATP binding), GO:0006468(biological_process: protein phosphorylation)	AT1G66980.1	suppressor of npr1-1 constitutive 4
Medtr1g027970	chr1	+	9376042	9378439	30.8055	31.2932	25.4723	20.4321	24.8605	23.1049	19.301	20.0637	21.8874	24.1581	25.9141	24.2774	receptor-like kinase	PF07714(Protein tyrosine kinase)	PTHR24420:SF441(), PTHR24420()	KOG1187(Serine/threonine protein kinase)			GO:0004672(molecular_function: protein kinase activity), GO:0006468(biological_process: protein phosphorylation)	AT1G66980.1	suppressor of npr1-1 constitutive 4
Medtr1g027990	chr1	-	9383872	9386910	12.0602	14.0959	9.63525	10.2025	11.0815	10.09	7.01864	6.60854	10.4365	9.76874	13.9163	11.4453	stress-induced receptor-like kinase	PF00069(Protein kinase domain)	PTHR24420(), PTHR24420:SF441()	KOG1187(Serine/threonine protein kinase)			GO:0004672(molecular_function: protein kinase activity), GO:0005524(molecular_function: ATP binding), GO:0006468(biological_process: protein phosphorylation)	AT1G66910.1	Protein kinase superfamily protein
Medtr1g028010	chr1	-	9391272	9395422	0.115695	0.282296	0.047576	0.230713	0.275043	0.090796	0.257238	0.321416	0.240957	0.115291	0.351193	0.443381	hypothetical protein
Medtr1g028020	chr1	-	9396920	9401393	0.001343	0	0.023865	0	0.012028	0	0.017914	0.044278	0	0.032715	0.005717	0	receptor-like kinase	PF00069(Protein kinase domain)	PTHR24420(), PTHR24420:SF441()	KOG1187(Serine/threonine protein kinase)			GO:0004672(molecular_function: protein kinase activity), GO:0005524(molecular_function: ATP binding), GO:0006468(biological_process: protein phosphorylation)	AT4G18250.1	receptor serine/threonine kinase, putative
MT4Noble_001368	chr1	-	9403005	9403800	0	0	0	0	0	0	0	0	0	0	0.122294	0
MT4Noble_001370	chr1	-	9412409	9412658	0	0	0	0	0	0	0	0	0	0.079468	0.115504	0.18631
Medtr1g028060	chr1	-	9417087	9418222	0.960612	0.724349	0.067427	0.103663	0.500122	0.490104	0.249831	0.312015	0.410251	1.296	0.298714	1.00257	hypothetical protein
Medtr1g028070	chr1	+	9418580	9419356	0.034969	0	0	0.027271	0	0	0	0	0	0	0.131642	0.228155	IAA-amino acid hydrolase ILR1-like protein		PTHR11014:SF41(), PTHR11014(PEPTIDASE M20 FAMILY MEMBER)					AT1G51760.1	peptidase M20/M25/M40 family protein
Medtr1g028080	chr1	-	9419828	9422200	3.19231	2.63703	1.66399	3.53409	3.17883	3.37435	4.01783	4.07686	3.62535	6.3143	5.95504	4.81472	receptor-like kinase	PF07714(Protein tyrosine kinase)	PTHR24420(), PTHR24420:SF441()	KOG1187(Serine/threonine protein kinase)			GO:0004672(molecular_function: protein kinase activity), GO:0006468(biological_process: protein phosphorylation)	AT1G66980.1	suppressor of npr1-1 constitutive 4
Medtr1g028090	chr1	+	9423734	9427938	1.61265	1.6546	1.0064	0.630332	0.506948	0.52922	0.592949	0.877639	0.608492	1.18714	2.45822	1.3745	hypothetical protein							AT1G66920.2	Protein kinase superfamily protein
MT4Noble_001375	chr1	+	9429319	9429776	0	0	0	0.020871	0	0.089872	0.376557	0	0	0	0.227116	0.30065
MT4Noble_001376	chr1	+	9430459	9430749	0	0	0	0	0.016918	0	0.286473	0.063916	0	0	0	0
Medtr1g028100	chr1	+	9431907	9433315	1.51194	2.9742	1.46998	0.642864	1.68128	1.30386	1.29972	0.83465	0.89799	1.25313	2.10183	2.33054	stress-induced receptor-like kinase	PF00069(Protein kinase domain)	PTHR24420(), PTHR24420:SF441()	KOG1187(Serine/threonine protein kinase)			GO:0004672(molecular_function: protein kinase activity), GO:0005524(molecular_function: ATP binding), GO:0006468(biological_process: protein phosphorylation)	AT1G66910.1	Protein kinase superfamily protein
Medtr1g028130	chr1	-	9437143	9440637	21.8227	16.5408	12.727	25.6457	19.5432	23.8147	23.6144	24.9028	24.1536	30.5871	33.4621	26.9278	receptor-like kinase	PF00069(Protein kinase domain)	PTHR24420(), PTHR24420:SF441()	KOG1187(Serine/threonine protein kinase)			GO:0004672(molecular_function: protein kinase activity), GO:0005524(molecular_function: ATP binding), GO:0006468(biological_process: protein phosphorylation)	AT1G66980.1	suppressor of npr1-1 constitutive 4
Medtr1g028150	chr1	+	9443897	9444932	14.9592	15.5436	17.2261	14.7951	15.2325	15.0414	13.5686	14.6129	16.544	22.9901	23.5956	20.9119	wall-associated receptor kinase galacturonan-binding protein							AT1G66920.2	Protein kinase superfamily protein
Medtr1g028160	chr1	-	9446579	9449384	2.46163	2.74255	1.63873	1.28358	2.28394	2.04382	1.46392	1.98694	1.78014	2.27405	3.03234	1.94833	transmembrane protein, putative
Medtr1g028170	chr1	+	9451279	9454456	17.3021	21.7246	18.3637	20.35	23.1599	19.7303	21.1606	20.1405	25.4891	29.8429	30.7071	29.8058	stress-induced receptor-like kinase	PF00069(Protein kinase domain)	PTHR24420(), PTHR24420:SF441()	KOG1187(Serine/threonine protein kinase)			GO:0004672(molecular_function: protein kinase activity), GO:0005524(molecular_function: ATP binding), GO:0006468(biological_process: protein phosphorylation)	AT1G66910.1	Protein kinase superfamily protein
Medtr1g028180	chr1	+	9455657	9455890	0	0	0	0	0	0	0	0	0	0	0.178498	0	hypothetical protein
Medtr1g028220	chr1	-	9466117	9467931	0	0.021482	0.002884	0.001547	0.008011	0.113852	0	0.002644	0.02442	0	0.033552	0.008552	receptor-like kinase	PF07714(Protein tyrosine kinase)	PTHR24420(), PTHR24420:SF441()	KOG1187(Serine/threonine protein kinase)			GO:0004672(molecular_function: protein kinase activity), GO:0006468(biological_process: protein phosphorylation)	AT1G70250.1	receptor serine/threonine kinase, putative
Medtr1g028250	chr1	+	9475037	9475971	0	0.088728	0.106429	0.091867	0.336139	0.184197	0.22605	0.094766	0.249271	0.289098	0.522245	0.415576	wall-associated receptor kinase galacturonan-binding protein							AT1G66920.2	Protein kinase superfamily protein
Medtr1g028280	chr1	-	9487950	9491291	0.028925	0	0.034678	0	0	0.029567	0.013016	0.016166	0.032092	0	0.019582	0	stress-induced receptor-like kinase, putative	PF00069(Protein kinase domain)	PTHR24420(), PTHR24420:SF441()	KOG1187(Serine/threonine protein kinase)			GO:0004672(molecular_function: protein kinase activity), GO:0005524(molecular_function: ATP binding), GO:0006468(biological_process: protein phosphorylation)	AT1G67000.1	Protein kinase superfamily protein
Medtr1g028290	chr1	+	9493222	9496168	0	0.020406	0	0	0.022873	0	0.058142	0.021982	0.022689	0.169759	0.631986	1.74997	receptor-like kinase	PF07714(Protein tyrosine kinase)	PTHR24420:SF441(), PTHR24420()	KOG1187(Serine/threonine protein kinase)			GO:0004672(molecular_function: protein kinase activity), GO:0006468(biological_process: protein phosphorylation)	AT5G38280.1	PR5-like receptor kinase
Medtr1g028300	chr1	+	9502076	9505086	16.5226	23.6702	14.2005	3.69351	8.35258	5.71521	5.39196	9.84464	6.88717	17.8233	21.738	24.4128	protein phosphatase 2C-like protein	PF00481(Protein phosphatase 2C)	PTHR13832:SF115(), PTHR13832(PROTEIN PHOSPHATASE 2C)	KOG0698(Serine/threonine protein phosphatase)			GO:0003824(molecular_function: catalytic activity)	AT2G29380.1	highly ABA-induced PP2C gene 3
Medtr1g028310	chr1	+	9510205	9513474	9.87349	9.17212	8.9248	11.9198	11.1024	9.52195	11.1053	12.166	13.4165	10.26	8.53911	10.1505	fertilization-independent endosperm protein	PF00400(WD domain, G-beta repeat)	PTHR10253:SF2(), PTHR10253(POLYCOMB PROTEIN)	KOG1034(Transcriptional repressor EED/ESC/FIE, required for transcriptional silencing, WD repeat superfamily)		K11462(Replication and repair: Chromosome and associated proteins [BR:ko03036]: EED; polycomb protein EED)	GO:0005515(molecular_function: protein binding)	AT3G20740.1	Transducin/WD40 repeat-like superfamily protein
Medtr1g028320	chr1	-	9514158	9515701	1.17041	1.94853	1.35196	0.42355	0.462652	0.504034	0.115446	0.507586	0.515178	1.18808	1.33932	0.374193	glucosamine-6-phosphate isomerase/6-phosphogluconolactonase	PF01182(Glucosamine-6-phosphate isomerases/6-phosphogluconolactonase)	PTHR11054(6-PHOSPHOGLUCONOLACTONASE)	KOG3147(6-phosphogluconolactonase - like protein)			GO:0005975(biological_process: carbohydrate metabolic process)	AT5G24400.1	NagB/RpiA/CoA transferase-like superfamily protein
Medtr1g028330	chr1	-	9518565	9520779	0.140935	0.392404	0.97958	0.016328	0.024548	0.0578	0	0.031709	0	0.129405	0	0.098633	glucosamine-6-phosphate isomerase/6-phosphogluconolactonase		PTHR11054(6-PHOSPHOGLUCONOLACTONASE)	KOG3147(6-phosphogluconolactonase - like protein)				AT5G24400.1	NagB/RpiA/CoA transferase-like superfamily protein
Medtr1g028350	chr1	-	9536573	9539061	1.04129	1.67378	0.978851	4.06391	3.96721	3.45259	3.1183	3.34856	4.3582	6.82573	5.72284	4.66775	transmembrane protein, putative
Medtr1g028360	chr1	+	9541147	9544464	0	0	0	0	0	0	0	0	0	0	0	0	spermine/spermidine synthase	PF01564(Spermine/spermidine synthase)	PTHR11558(SPERMIDINE/SPERMINE SYNTHASE), PTHR11558:SF11(SPERMIDINE SYNTHASE)	KOG1562(Spermidine synthase)			GO:0003824(molecular_function: catalytic activity)	AT5G53120.1	spermidine synthase 3
Medtr1g028370	chr1	-	9544996	9551891	6.5552	8.74005	5.46252	3.88147	5.6242	5.18194	3.05594	2.09963	2.73362	3.91097	4.83497	3.81553	cyclic nucleotide-gated ion channel-like protein	PF00027(Cyclic nucleotide-binding domain)	PTHR10217:SF7(), PTHR10217(VOLTAGE AND LIGAND GATED POTASSIUM CHANNEL)	KOG0498(K+-channel ERG and related proteins, contain PAS/PAC sensor domain)				AT5G53130.1	cyclic nucleotide gated channel 1
Medtr1g028380	chr1	+	9560076	9562623	20.1224	15.6462	14.4947	24.2468	24.8247	20.5082	27.279	28.3161	27.3289	35.1448	32.4146	28.9482	abscisic acid receptor PYL9-like protein	PF10604(Polyketide cyclase / dehydrase and lipid transport)				K14496(Signal transduction: Plant hormone signal transduction [PATH:ko04075]: PYL; abscisic acid receptor PYR/PYL family)		AT5G53160.2	regulatory components of ABA receptor 3
Medtr1g028390	chr1	-	9564094	9573739	93.8076	91.9489	96.4604	107.092	109.437	105.068	112.186	121.236	124.953	111.209	110.158	121.828	ATP-dependent zinc metalloprotease FTSH protein	PF01434(Peptidase family M41), PF00004(ATPase family associated with various cellular activities (AAA))	PTHR23076(METALLOPROTEASE M41 FTSH), PTHR23076:SF10(PROTEIN SPG-7)	KOG0734(AAA+-type ATPase containing the peptidase M41 domain)			GO:0005524(molecular_function: ATP binding), GO:0004222(molecular_function: metalloendopeptidase activity), GO:0006508(biological_process: proteolysis)	AT5G53170.1	FTSH protease 11
Medtr1g028410	chr1	-	9585049	9587567	0	0	0	0	0	0	0	0	0	0	0	0	hypothetical protein
Medtr1g028440	chr1	-	9594292	9601447	22.9299	25.6701	24.7167	26.1117	25.5224	26.9957	25.2341	23.9228	24.909	25.4329	24.3634	28.3556	polypyrimidine tract-binding-like protein	PF00076(RNA recognition motif. (a.k.a. RRM, RBD, or RNP domain))	PTHR11546:SF16(), PTHR11546()	KOG1190(Polypyrimidine tract-binding protein)			GO:0003676(molecular_function: nucleic acid binding)	AT5G53180.1	polypyrimidine tract-binding protein 2
Medtr1g028450	chr1	+	9597709	9599229	1.26177	1.7352	0.802737	1.03369	1.77394	0.591044	1.89962	1.39834	1.42313	1.16454	0.805319	1.77716	hypothetical protein
Medtr1g028460	chr1	-	9609945	9612620	2.43957	2.42657	2.82123	3.87075	3.62063	3.43873	2.86112	3.2684	2.8649	4.36569	2.83988	1.4401	bidirectional sugar transporter	PF03083(Sugar efflux transporter for intercellular exchange)	PTHR10791(RAG1-ACTIVATING PROTEIN 1)	KOG1623(Multitransmembrane protein)			GO:0016021(cellular_component: integral component of membrane)	AT5G53190.1	Nodulin MtN3 family protein
Medtr1g028470	chr1	-	9629472	9631278	0	0	0	0	0	0	0	0	0	0	0	0	basic helix loop helix (BHLH) DNA-binding family protein	PF00010(Helix-loop-helix DNA-binding domain)	PTHR11534(MYOGENIC FACTOR), PTHR11534:SF7()				GO:0046983(molecular_function: protein dimerization activity)	AT5G53210.1	basic helix-loop-helix (bHLH) DNA-binding superfamily protein
Medtr1g028510	chr1	-	9645711	9657320	1.39872	1.28876	1.59336	2.29468	1.46306	1.99115	2.29806	2.14217	1.94626	1.03627	1.37436	1.14003	tetrahydrofolylpolyglutamate synthase	PF08245(Mur ligase middle domain)	PTHR11136(FOLYLPOLYGLUTAMATE SYNTHASE-RELATED)				GO:0005524(molecular_function: ATP binding), GO:0009058(biological_process: biosynthetic process)	AT5G41480.1	Folylpolyglutamate synthetase family protein
Medtr1g028560	chr1	+	9676743	9678418	0.024224	0.098751	0.096285	0.022744	0.088874	0.040952	0.056495	0.131478	0.217858	0.049828	0.033527	0	AP2 domain class transcription factor	PF00847(AP2 domain)					GO:0003700(molecular_function: sequence-specific DNA binding transcription factor activity), GO:0006355(biological_process: regulation of transcription, DNA-templated)	AT4G27950.1	cytokinin response factor 4
Medtr1g028580	chr1	-	9690415	9695401	7.12238	6.60962	4.04874	7.32593	7.27417	8.54043	7.32371	7.7009	6.62962	8.68044	8.38827	8.51683	plastid division PDV1-like protein, putative							AT5G53280.1	plastid division1
Medtr1g028610	chr1	-	9703281	9704641	0	0	0	0	0.079558	0	0	0	0	0	0	0	arabinogalactan peptide-like protein	PF06376(Protein of unknown function (DUF1070))						AT2G46330.1	arabinogalactan protein 16
Medtr1g028620	chr1	-	9705975	9709082	0.367271	0.168741	0.256605	0.275232	0.418326	0.31149	0.314958	0.367244	0.352724	0.393176	0.320734	0.358136	hypothetical protein							AT5G53220.1
Medtr1g028690	chr1	+	9752085	9752460	0	0	0	0	0	0	0	0	0	0	0	0	hypothetical protein
Medtr1g028700	chr1	-	9755477	9756192	0	0.218488	0.169139	0.062044	0.09125	0	0	0.127331	0	0	0.086396	0.043285	hypothetical protein
Medtr1g028710	chr1	+	9756321	9756683	0	0	0	0.10007	0	0.133709	0	0	0.173449	0.044691	0.238074	0.106305	hypothetical protein
Medtr1g028720	chr1	-	9765197	9767710	1.08599	1.06099	1.18557	0.475407	0.913558	1.61892	0.524258	0.493926	0.810524	0.793812	0.777077	1.4045	NB-ARC domain disease resistance protein	PF00931(NB-ARC domain)	PTHR23155(LEUCINE-RICH REPEAT-CONTAINING PROTEIN), PTHR23155:SF108()	KOG4658(Apoptotic ATPase)			GO:0043531(molecular_function: ADP binding)	AT5G63020.1	Disease resistance protein (CC-NBS-LRR class) family
MT4Noble_001426	chr1	+	9770276	9770536	0.650363	0.148333	1.09678	0.203499	0.190233	0.657703	0.137838	0.266022	0.368149	0	0.096881	0.813561
Medtr1g028770	chr1	+	9786359	9786939	0	0	0	0.006198	0	0	0	0.025144	0	0	0	0	hypothetical protein
Medtr1g028880	chr1	-	9827101	9829942	0	0	0	0	0	0	0	0	0	0	0	0	hypothetical protein							AT5G53220.1
Medtr1g028890	chr1	-	9836147	9839907	0.01876	0.018973	0.012863	0.20503	0.337538	0.035832	0.163783	0.139095	0.126364	1.00003	1.01603	2.98249	LRR receptor-like kinase	PF07714(Protein tyrosine kinase), PF08263(Leucine rich repeat N-terminal domain)	PTHR24420(), PTHR24420:SF850()	KOG1187(Serine/threonine protein kinase)			GO:0004672(molecular_function: protein kinase activity), GO:0006468(biological_process: protein phosphorylation)	AT4G23740.1	Leucine-rich repeat protein kinase family protein
Medtr1g028920	chr1	-	9855883	9856191	0	0	0	0.123364	0	0	0.241746	0	0	0	0	0.313067	VQ motif protein	PF05678(VQ motif)						AT3G18690.1	MAP kinase substrate 1
Medtr1g028950	chr1	-	9868259	9870138	0	0	0	0	0	0	0	0.079602	0	0	0.047419	0	hypothetical protein
Medtr1g029000	chr1	+	9887989	9893526	11.9	8.3572	7.86343	14.3036	12.8703	12.8814	13.2415	13.0972	13.9483	15.8715	16.1974	13.5093	transmembrane protein, putative							AT1G21370.1
Medtr1g029030	chr1	-	9906337	9907347	0	0	0	0.002081	0.021437	0.001544	0	0	0.017863	0	0	0.007248	transmembrane protein, putative
MT4Noble_001445	chr1	+	9912060	9913624	0	0	0	0	0	0.042825	0	0	0	0	0	0	Transmembrane protein, putative | PF03004 Plant transposase (Ptta/En/Spm family)
Medtr1g029130	chr1	+	9941161	9944849	6.29031	6.31532	5.33463	6.9643	7.05514	7.1864	8.51567	7.56881	8.40661	7.96816	7.28255	8.16657	UDP-glucuronate:xylan alpha-glucuronosyltransferase	PF01501(Glycosyl transferase family 8)	PTHR11183(GLYCOGENIN), PTHR11183:SF7()	KOG1950(Glycosyl transferase, family 8 - glycogenin)			GO:0016757(molecular_function: transferase activity, transferring glycosyl groups)	AT1G77130.1	plant glycogenin-like starch initiation protein 2
Medtr1g029140	chr1	+	9945563	9946595	1.01544	0.701912	1.46585	0.203452	0.332448	0.213519	0.024911	0.213916	0	0.819022	2.72741	12.0307	transmembrane protein, putative							AT1G43790.1	tracheary element differentiation-related 6
Medtr1g029150	chr1	+	9950088	9952717	0.099012	0.086782	0.058754	0.430733	0.612371	0.250232	0.146175	0.346229	0.256263	2.18214	2.44104	6.16136	stearoyl-acyl-carrier desaturase	PF03405(Fatty acid desaturase)			1.14.19.2(Acyl-[acyl-carrier-protein] desaturase.)	K03921(Lipid metabolism: Lipid biosynthesis proteins [BR:ko01004]: FAB2, SSI2, desA1; acyl-[acyl-carrier-protein] desaturase)	GO:0045300(molecular_function: acyl-[acyl-carrier-protein] desaturase activity), GO:0006631(biological_process: fatty acid metabolic process), GO:0055114(biological_process: oxidation-reduction process)	AT1G43800.1	Plant stearoyl-acyl-carrier-protein desaturase family protein
Medtr1g029190	chr1	-	9960584	9970586	0	0.019182	0.06273	0	0	0.0147	0	0	0	0	0	0	auxin efflux carrier family transporter	PF03547(Membrane transport protein)				K13947(Membrane transport: Transporters [BR:ko02000]: PIN; auxin efflux carrier family)	GO:0055085(biological_process: transmembrane transport), GO:0016021(cellular_component: integral component of membrane)	AT1G77110.1	Auxin efflux carrier family protein
Medtr1g029260	chr1	+	9993914	9995124	0	0	0	0	0	0	0	0	0	0.012406	0	0	hypothetical protein
Medtr1g029330	chr1	+	10037420	10038783	0	0	0	0	0	0	0	0	0	0	0	0.001774	F-box/LRR plant protein	PF00646(F-box domain)	PTHR23125(), PTHR23125:SF101()				GO:0005515(molecular_function: protein binding)	AT3G48880.1	RNI-like superfamily protein
Medtr1g029350	chr1	+	10041664	10048151	2.24881	2.80988	2.41623	2.43486	2.9166	2.05724	3.13061	3.37096	2.58776	2.45365	2.1549	2.19438	exostosin family protein	PF03016(Exostosin family)	PTHR11062(EXOSTOSIN HEPARAN SULFATE GLYCOSYLTRANSFERASE -RELATED), PTHR11062:SF39()	KOG1021(Acetylglucosaminyltransferase EXT1/exostosin 1)				AT1G21480.1	Exostosin family protein
Medtr1g029380	chr1	+	10054058	10056439	0.116709	0.291465	0.139845	0.106544	0.311425	0.211603	0	0	0.084737	0.058267	0.339959	0.051321	bidirectional sugar transporter	PF03083(Sugar efflux transporter for intercellular exchange)	PTHR10791(RAG1-ACTIVATING PROTEIN 1)	KOG1623(Multitransmembrane protein)			GO:0016021(cellular_component: integral component of membrane)	AT1G21460.1	Nodulin MtN3 family protein
Medtr1g029400	chr1	+	10071239	10080236	21.8153	22.4454	20.3277	19.5799	22.3761	19.9572	16.9443	18.1014	20.2127	22.7263	21.1806	23.0879	transcriptional corepressor SEUSS-like protein		PTHR10378:SF6(), PTHR10378(LIM DOMAIN-BINDING PROTEIN)					AT1G43850.1	SEUSS transcriptional co-regulator
Medtr1g029410	chr1	+	10081800	10091381	7.05026	6.17479	4.35603	8.0368	7.88807	6.21924	7.59534	7.47413	6.77559	7.69457	8.42281	8.55049	small RNA degrading nuclease	PF00929(Exonuclease)	PTHR12801(EXONUCLEASE)	KOG2248(3'-5' exonuclease)				AT5G25800.1	Polynucleotidyl transferase, ribonuclease H-like superfamily protein
Medtr1g029420	chr1	-	10092148	10095890	38.9606	47.69	43.2359	44.7218	56.8341	45.8829	36.3571	37.1378	39.6285	46.4374	49.4431	51.2528	GRAS family transcription factor	PF03514(GRAS domain family)						AT1G21450.1	SCARECROW-like 1
Medtr1g029440	chr1	+	10107059	10108491	69.1984	68.0965	57.7119	74.6116	79.1754	73.2797	57.5732	63.789	66.1939	81.1138	85.3848	88.4288	transmembrane protein, putative							AT1G31130.1
Medtr1g029450	chr1	+	10110413	10114701	15.829	17.0111	16.6045	13.299	13.4318	11.977	14.4409	12.7398	12.796	18.1392	18.265	16.5731	small GTPase family RAB protein	PF00071(Ras family)	PTHR24073:SF482(RAS-RELATED PROTEIN RAB-7B), PTHR24073(FAMILY NOT NAMED)	KOG0080(GTPase Rab18, small G protein superfamily)		K07910(Signaling molecules and interaction: GTP-binding proteins [BR:ko04031]: RAB18; Ras-related protein Rab-18)	GO:0005525(molecular_function: GTP binding), GO:0007264(biological_process: small GTPase mediated signal transduction)	AT1G43890.1	RAB GTPASE HOMOLOG B18
Medtr1g029460	chr1	+	10116505	10120061	0.035886	0.034538	0.001524	0	0	0	0	0	0	0.052545	0.083246	0	DnaJ heat shock amine-terminal domain protein	PF00226(DnaJ domain)	PTHR24077()	KOG0691(Molecular chaperone (DnaJ superfamily))				AT1G77020.1	DNAJ heat shock N-terminal domain-containing protein
Medtr1g029470	chr1	+	10123465	10127643	2.07238	1.50999	1.98203	1.30216	1.15021	2.36533	0.533437	1.4323	0.985536	1.2381	0.977911	1.23116	DnaJ heat shock amine-terminal domain protein	PF00226(DnaJ domain)	PTHR24076:SF72(), PTHR24076()	KOG0691(Molecular chaperone (DnaJ superfamily))				AT1G77020.1	DNAJ heat shock N-terminal domain-containing protein
Medtr1g029480	chr1	-	10127929	10128200	0	0	0	0	0	0	0	0	0	0	0	0	hypothetical protein
Medtr1g029490	chr1	+	10128811	10130651	0.210146	0.134137	0.255039	0.190632	0.123431	0.334312	0.417629	0.151109	0.142799	0	0.200733	0.026273	pentatricopeptide (PPR) repeat protein	PF01535(PPR repeat)	PTHR24015(FAMILY NOT NAMED)					AT1G62670.1	rna processing factor 2
Medtr1g029500	chr1	-	10130817	10133328	1.28341	0.913369	1.0672	3.14032	4.65116	3.82434	4.32195	4.94299	5.20481	6.9198	6.28545	8.33128	F-box SKP2A-like protein		PTHR23125:SF104(), PTHR23125()	KOG1947(Leucine rich repeat proteins, some proteins contain F-box)		K03875(Infectious diseases: Epstein-Barr virus infection [PATH:ko05169]: SKP2, FBXL1; F-box and leucine-rich repeat protein 1 (S-phase kinase-associated protein 2))		AT1G21410.1	F-box/RNI-like superfamily protein
Medtr1g029520	chr1	-	10141713	10147665	5.23766	5.04739	4.86768	5.06487	5.28141	4.78648	3.95436	5.0144	5.27597	7.2822	5.60831	6.84178	four ACT domain ACT domain protein which protein	PF01842(ACT domain)	PTHR13734:SF23(), PTHR13734(TRNA-NUCLEOTIDYLTRANSFERASE/POLY A POLYMERASE FAMILY MEMBER)				GO:0016597(molecular_function: amino acid binding), GO:0008152(biological_process: metabolic process)	AT1G76990.1	ACT domain repeat 3
Medtr1g029540	chr1	+	10161428	10162813	2.96989	3.86072	3.29885	4.44022	4.82395	4.07536	2.60349	1.73503	2.28141	5.77537	7.31022	9.85071	zeatin O-glucosyltransferase-like protein	PF00201(UDP-glucoronosyl and UDP-glucosyl transferase)	PTHR11926:SF15(), PTHR11926(GLUCOSYL/GLUCURONOSYL TRANSFERASES)	KOG1192(UDP-glucuronosyl and UDP-glucosyl transferase)			GO:0016758(molecular_function: transferase activity, transferring hexosyl groups), GO:0008152(biological_process: metabolic process)	AT2G15490.1	UDP-glycosyltransferase 73B4
MT4Noble_001482	chr1	-	10161859	10162114	0	0	0	0	0	0	0	0	0	0	0	0
Medtr1g029550	chr1	+	10168072	10171905	1.7047	2.14	1.40257	2.51851	3.18542	3.60166	1.85145	2.20208	2.35111	3.86346	4.89946	5.87767	hypothetical protein							AT1G76980.1
Medtr1g029560	chr1	-	10173527	10174402	0	0	0	0	0	0	0	0.094458	0	0	0	0	M48 family peptidase	PF01435(Peptidase family M48)	PTHR22726(OMA1 HOMOLOG, ZINC METALLOPEPTIDASE)				GO:0004222(molecular_function: metalloendopeptidase activity), GO:0006508(biological_process: proteolysis), GO:0016020(cellular_component: membrane)	AT5G51740.1	Peptidase family M48 family protein
Medtr1g029590	chr1	+	10184799	10185166	0.227468	0	0	0	0	0.027783	0	0	0	0.211109	0.192002	0	hypothetical protein
Medtr1g029600	chr1	+	10187403	10188286	0.130416	0.341446	2.24598	0.448321	0.213244	0.189881	0.21083	0.196619	0.104348	0.807394	0.820404	0.717326	receptor-like kinase plant, putative							AT1G11050.1	Protein kinase superfamily protein
Medtr1g029610	chr1	+	10190369	10192447	25.381	28.0176	14.6019	43.0175	37.1116	45.6001	19.6299	18.8793	29.3212	46.9697	46.2639	51.3748	receptor-like kinase plant-like protein, putative	PF00069(Protein kinase domain)	PTHR24420(), PTHR24420:SF420()	KOG1187(Serine/threonine protein kinase)			GO:0004672(molecular_function: protein kinase activity), GO:0005524(molecular_function: ATP binding), GO:0006468(biological_process: protein phosphorylation)	AT1G11050.1	Protein kinase superfamily protein
Medtr1g029620	chr1	-	10193513	10201356	56.8908	55.8147	57.7017	65.193	72.096	72.3675	60.0822	61.0491	66.4866	85.6273	82.3702	99.2263	NAD/NADH kinase family protein	PF01513(ATP-NAD kinase)	PTHR20275(FAMILY NOT NAMED)				GO:0003951(molecular_function: NAD+ kinase activity), GO:0006741(biological_process: NADP biosynthetic process), GO:0008152(biological_process: metabolic process)	AT1G21640.1	NAD kinase 2
Medtr1g029630	chr1	-	10202528	10213449	1.15592	1.45907	1.39297	1.99071	1.93855	1.86479	2.01242	2.1697	2.13734	2.05125	1.88512	1.69734	DNA topoisomerase 2-binding-like protein	PF00533(BRCA1 C Terminus (BRCT) domain)	PTHR13561:SF18(), PTHR13561(DNA REPLICATION REGULATOR DPB11-RELATED)			K10728(Replication and repair: DNA repair and recombination proteins [BR:ko03400]: TOPBP1; topoisomerase (DNA) II binding protein 1)		AT1G77320.1	transcription coactivators
Medtr1g029650	chr1	+	10217958	10220427	1.34087	1.01647	1.05085	1.8722	1.22959	1.9632	1.63053	2.01739	2.09616	2.55169	2.15033	1.47713	F-box protein interaction domain protein	PF00646(F-box domain)					GO:0005515(molecular_function: protein binding)	AT3G23880.1	F-box and associated interaction domains-containing protein
MT4Noble_001492	chr1	-	10218014	10218422	0.130589	0	0.02915	0	0.053663	0.007687	0	0	0	0	0.042001	0.025406
Medtr1g029660	chr1	+	10221590	10222196	0.009588	0.068109	0	0.142765	0	0.006733	0.185007	0	0.089913	0.082132	0.043509	0.198947	hypothetical protein
MT4Noble_001494	chr1	+	10222374	10223421	0	0.223582	0.165852	0	0	0	0.409298	0	0	0	0	0
Medtr1g029670	chr1	-	10223486	10225617	0.031315	0.172014	0.074212	0.069635	0.126231	0.141255	0.051236	0.027782	0.086685	0.069406	0.146245	0.048824	MADS-box transcription factor	PF01486(K-box region), PF00319(SRF-type transcription factor (DNA-binding and dimerisation domain))	PTHR11945:SF134(), PTHR11945(MADS BOX PROTEIN)	KOG0014(MADS box transcription factor)			GO:0003677(molecular_function: DNA binding), GO:0046983(molecular_function: protein dimerization activity), GO:0003700(molecular_function: sequence-specific DNA binding transcription factor activity), GO:0006355(biological_process: regulation of transcription, DNA-templated), GO:0005634(cellular_component: nucleus)	AT5G20240.1	K-box region and MADS-box transcription factor family protein
Medtr1g029680	chr1	+	10232447	10245932	1.73604	1.21289	1.28223	1.90838	1.62935	1.68678	1.54155	1.62222	1.88424	2.47718	2.23288	2.35285	wound-responsive family protein		PTHR16426:SF7(), PTHR16426()					AT1G21610.2	wound-responsive family protein
Medtr1g029690	chr1	+	10257112	10261697	2.41521	1.56163	2.29501	1.22257	1.02908	1.22257	1.43971	1.29377	0.79501	1.31573	0.962224	0.87031	adenine nucleotide alpha hydrolase-like domain kinase	PF00069(Protein kinase domain)	PTHR24420(), PTHR24420:SF425()	KOG1187(Serine/threonine protein kinase)			GO:0004672(molecular_function: protein kinase activity), GO:0005524(molecular_function: ATP binding), GO:0006468(biological_process: protein phosphorylation)	AT1G77280.1	Protein kinase protein with adenine nucleotide alpha hydrolases-like domain
Medtr1g029710	chr1	+	10267097	10277364	15.0084	13.8953	13.8313	12.4059	13.2325	13.6014	10.1143	12.0012	15.0181	13.7334	12.4171	15.5168	zinc finger CCCH domain protein, putative							AT1G21580.1	Zinc finger C-x8-C-x5-C-x3-H type family protein
Medtr1g029720	chr1	+	10279965	10284682	9.8623	7.5507	5.88449	14.7269	12.8305	12.6206	11.6371	12.3033	12.6385	15.0862	16.4106	16.1099	TPR repeat protein	PF00515(Tetratricopeptide repeat)	PTHR15544(OSMOSIS RESPONSIVE FACTOR)				GO:0005515(molecular_function: protein binding)	AT1G77230.1	Tetratricopeptide repeat (TPR)-like superfamily protein
Medtr1g029730	chr1	+	10285380	10291199	9.51003	7.83558	7.63913	9.06686	8.70406	7.79828	9.74037	9.02111	8.23608	9.02211	8.63197	9.25527	methyltransferase PMT16, putative	PF03141(Putative S-adenosyl-L-methionine-dependent methyltransferase)	PTHR10108(METHYLTRANSFERASE), PTHR10108:SF58()				GO:0008168(molecular_function: methyltransferase activity)	AT1G77260.1	S-adenosyl-L-methionine-dependent methyltransferases superfamily protein
Medtr1g029750	chr1	-	10297813	10302811	47.2946	73.1856	57.2951	47.4695	61.2378	55.396	26.2643	31.6527	28.9724	61.5622	64.9466	82.2056	transmembrane amino acid transporter family protein	PF01490(Transmembrane amino acid transporter protein)	PTHR22950(AMINO ACID TRANSPORTER)	KOG1303(Amino acid transporters)				AT5G09220.1	amino acid permease 2
MT4Noble_001503	chr1	-	10302469	10302727	5.20292	4.47065	2.43437	8.96922	9.67118	8.14564	3.10736	5.82639	4.45409	12.6738	10.7509	15.1264
Medtr1g029760	chr1	-	10308671	10310555	0	0.054073	0.01393	0.129733	0.284961	0.244881	0	0.128661	0.069808	0.095516	0.224665	0.319497	hypothetical protein
Medtr1g029790	chr1	-	10313898	10323565	5.89015	6.22391	6.56542	4.71705	5.13254	4.76285	5.6512	5.19646	5.06005	4.28289	3.81232	4.03446	armadillo/beta-catenin-like repeat protein	PF00168(C2 domain), PF00514(Armadillo/beta-catenin-like repeat)	PTHR23315:SF7(U-BOX DOMAIN-CONTAINING PROTEIN 2-RELATED), PTHR23315(BETA CATENIN-RELATED ARMADILLO REPEAT-CONTAINING)	KOG0166(Karyopherin (importin) alpha)			GO:0005515(molecular_function: protein binding)	AT1G77460.1	Armadillo/beta-catenin-like repeat ; C2 calcium/lipid-binding domain (CaLB) protein
Medtr1g029800	chr1	+	10325682	10326733	1.30282	0.378417	1.04458	0.947973	0.293986	0.221913	0.470077	0.300456	0.131487	0.119017	0.174159	0	transmembrane protein, putative
Medtr1g029810	chr1	-	10327870	10331864	44.6948	81.1538	54.9824	19.6442	33.3539	25.3898	16.6243	13.3876	17.2968	21.2893	25.7849	22.7061	eukaryotic aspartyl protease family protein	PF00026(Eukaryotic aspartyl protease)	PTHR13683:SF98(), PTHR13683(ASPARTYL PROTEASES)	KOG1339(Aspartyl protease)			GO:0004190(molecular_function: aspartic-type endopeptidase activity), GO:0006508(biological_process: proteolysis)	AT1G44130.1	Eukaryotic aspartyl protease family protein
Medtr1g029840	chr1	-	10360290	10369270	26.7548	27.707	25.6655	32.2784	31.0317	31.3006	34.0099	36.3283	36.2707	71.3708	73.3183	89.199	NAD-dependent aldehyde dehydrogenase family protein	PF00171(Aldehyde dehydrogenase family)	PTHR11699(ALDEHYDE DEHYDROGENASE-RELATED), PTHR11699:SF15(ALDEHYDE DEHYDROGENASE TYPE III, ISOFORM O)	KOG2456(Aldehyde dehydrogenase)	1.2.1.3(Aldehyde dehydrogenase (NAD(+)).)	K00128(Xenobiotics biodegradation and metabolism: Chloroalkane and chloroalkene degradation [PATH:ko00625]: ALDH; aldehyde dehydrogenase (NAD+))	GO:0016491(molecular_function: oxidoreductase activity), GO:0008152(biological_process: metabolic process), GO:0055114(biological_process: oxidation-reduction process)	AT1G44170.1	aldehyde dehydrogenase 3H1
MT4Noble_001512	chr1	-	10368606	10369119	12.3036	12.1064	11.2221	10.7613	9.68363	10.4175	12.0544	14.0978	14.0945	21.5615	22.941	27.4395	Aldehyde dehydrogenase
Medtr1g029850	chr1	+	10376822	10380705	6.91323	6.39116	6.65511	7.84453	8.22672	9.32775	8.36371	8.33882	8.21173	12.0419	10.5151	14.5142	BTB/POZ domain plant protein	PF00651(BTB/POZ domain)	PTHR24413(FAMILY NOT NAMED), PTHR24413:SF216()				GO:0005515(molecular_function: protein binding)	AT1G21780.1	BTB/POZ domain-containing protein
Medtr1g029930	chr1	-	10409687	10412420	0	0.000751	0.001801	0	0	0	0	0	0.003404	0	0.001017	0	LRR receptor-like kinase	PF00069(Protein kinase domain), PF00560(Leucine Rich Repeat), PF08263(Leucine rich repeat N-terminal domain)	PTHR24420(), PTHR24420:SF474()	KOG0472(Leucine-rich repeat protein)			GO:0004672(molecular_function: protein kinase activity), GO:0005524(molecular_function: ATP binding), GO:0006468(biological_process: protein phosphorylation), GO:0005515(molecular_function: protein binding)	AT3G47570.1	Leucine-rich repeat protein kinase family protein
[truncated: 39,473 more rows]

## Sheet: FPKM Values Dark treatment
Gene ID	Chromosome	Strand	Start	End	0d_dark_R1	0d_dark_R2	0d_dark_R3	1d_dark_R1	1d_dark_R2	1d_dark_R3	2d_dark_R1	2d_dark_R2	2d_dark_R3	3d_dark_R1	3d_dark_R2	3d_dark_R3	Gene description	PFAM domains	PANTHER families	KEGG Orthologous Groups	EC Pathways	KEGG Pathways	Gene Ontology	Arabidopsis hit ID	Arabidopsis hit description
[truncated: 40,685 more rows]
