# Supplementary material for: Transcriptional Programs and Regulators Underlying Age-Dependent and Dark-Induced Senescence in Medicago truncatula
Source: Cells. 2022 May 6;11(9):1570. doi: 10.3390/cells11091570 (PMC9103780; doi:10.3390/cells11091570)
Supplement: Supplementary file 1 [file cells-11-01570-s001.zip › Supplementary Dataset S2. Log2 Fold change values of DE genes during age-dependent senescence.xlsx]

## Sheet: 28d.21d genes
Gene ID	log2FoldChange	lfcSE	stat	pvalue	padj	Gene description	ATG ID	Annotation
Medtr2g043030	7.31318	0.89348	8.18506	2.72167e-16	2.17733e-14	PF00847(AP2 domain)	AT1G19210	Integrase-type DNA-binding superfamily protein
Medtr5g056140	7.00354	1.27076	5.51131	3.56169e-08	5.74382e-07	PF02265(S1/P1 Nuclease)	AT1G68290	endonuclease 2
Medtr2g043020	6.75355	0.864331	7.81361	5.55719e-15	3.60672e-13	PF00847(AP2 domain)	AT1G19210	Integrase-type DNA-binding superfamily protein
Medtr7g012040	6.70913	1.67822	3.99776	6.39443e-05	0.000459871	PF00891(O-methyltransferase), PF08100(Dimerisation domain)	AT5G54160	O-methyltransferase 1
Medtr2g043040	6.40174	0.840625	7.61546	2.62755e-14	1.48988e-12	PF00847(AP2 domain)	AT1G19210	Integrase-type DNA-binding superfamily protein
Medtr7g068370	6.01585	1.80821	3.32696	0.000877992	0.00445985
Medtr3g103210	5.50436	1.25849	4.37377	1.2212e-05	0.000107719
Medtr2g023810	5.48328	1.43084	3.8322	0.000127001	0.000839696		AT4G04480
Medtr5g064950	5.2814	1.62133	3.25744	0.0011242	0.00550154	PF00010(Helix-loop-helix DNA-binding domain)	AT1G72210	basic helix-loop-helix (bHLH) DNA-binding superfamily protein
Medtr2g094020	5.26241	0.652314	8.0673	7.187e-16	5.40659e-14	PF01301(Glycosyl hydrolases family 35), PF02140(Galactose binding lectin domain), PF02837(Glycosyl hydrolases family 2, sugar binding domain)	AT2G28470	beta-galactosidase 8
Medtr4g121570	5.10077	1.84914	2.75845	0.00580754	0.0220037		AT4G24220	NAD(P)-binding Rossmann-fold superfamily protein
Medtr1g081420	5.07592	0.821407	6.17954	6.42883e-10	1.49329e-08	PF00383(Cytidine and deoxycytidylate deaminase zinc-binding region)	AT5G28050	Cytidine/deoxycytidylate deaminase family protein
Medtr3g467290	5.02755	1.29336	3.88721	0.000101401	0.000690081	PF00067(Cytochrome P450)	AT4G39950	cytochrome P450, family 79, subfamily B, polypeptide 2
Medtr0056s0160	5.01302	0.805136	6.2263	4.77582e-10	1.13217e-08	PF03171(2OG-Fe(II) oxygenase superfamily)	AT1G17020	senescence-related gene 1
Medtr7g007820	4.95642	1.61121	3.07621	0.00209652	0.00941747	PF08263(Leucine rich repeat N-terminal domain), PF00560(Leucine Rich Repeat)	AT1G45616	receptor like protein 6
Medtr1g103420	4.84583	1.94239	2.49477	0.0126038	0.0416875	PF00234(Protease inhibitor/seed storage/LTP family)	AT1G05450	Bifunctional inhibitor/lipid-transfer protein/seed storage 2S albumin superfamily protein
Medtr3g088855	4.76557	1.261	3.77919	0.000157338	0.00100549	PF00069(Protein kinase domain)	AT5G56790	Protein kinase superfamily protein
Medtr2g059890	4.75398	1.54061	3.08578	0.00203022	0.0091491	PF00581(Rhodanese-like domain)	AT2G21045	Rhodanese/Cell cycle control phosphatase superfamily protein
Medtr3g024520	4.7471	0.611291	7.7657	8.11949e-15	5.09488e-13	PF00067(Cytochrome P450)	AT5G07990	Cytochrome P450 superfamily protein
Medtr2g023760	4.71687	1.23456	3.8207	0.000133071	0.00087221		AT4G22030	F-box family protein with a domain of unknown function (DUF295)
Medtr4g125620	4.68418	1.323	3.54057	0.00039927	0.0022625		AT3G42800
Medtr1g011600	4.62303	1.39831	3.30615	0.000945861	0.00475083	PF03171(2OG-Fe(II) oxygenase superfamily)	AT1G52820	2-oxoglutarate (2OG) and Fe(II)-dependent oxygenase superfamily protein
Medtr6g005630	4.62121	1.48014	3.12215	0.00179537	0.00822372	PF00295(Glycosyl hydrolases family 28)	AT5G14650	Pectin lyase-like superfamily protein
Medtr2g043050	4.61575	0.67355	6.85286	7.23861e-12	2.4669e-10	PF00847(AP2 domain)	AT1G19210	Integrase-type DNA-binding superfamily protein
Medtr4g086165	4.61499	0.819585	5.63088	1.79288e-08	3.09488e-07	PF00847(AP2 domain)	AT4G34410	redox responsive transcription factor 1
Medtr2g101650	4.61368	1.38094	3.34097	0.000834861	0.00426943	PF00854(POT family)	AT1G52190	Major facilitator superfamily protein
Medtr1g007830	4.51102	1.34834	3.3456	0.000821037	0.00420931		AT4G27790	Calcium-binding EF hand family protein
Medtr2g013010	4.43468	0.572492	7.74627	9.46337e-15	5.86862e-13	PF12143(Protein of unknown function (DUF_B2219)), PF00264(Common central domain of tyrosinase), PF12142(Polyphenol oxidase middle domain)
Medtr5g045770	4.34724	0.326044	13.3333	1.48256e-40	2.61721e-37	PF00067(Cytochrome P450)	AT4G31500	cytochrome P450, family 83, subfamily B, polypeptide 1
Medtr8g041870	4.31126	1.4985	2.87705	0.00401409	0.0162082	PF01657(Salt stress response/antifungal)	AT4G05200	cysteine-rich RLK (RECEPTOR-like protein kinase) 25
Medtr7g077180	4.30188	0.69336	6.20439	5.49077e-10	1.28669e-08	PF00228(Bowman-Birk serine protease inhibitor family)
Medtr4g026080	4.28273	1.35771	3.15438	0.00160842	0.00748784	PF00067(Cytochrome P450)	AT3G26330	cytochrome P450, family 71, subfamily B, polypeptide 37
Medtr6g027740	4.27501	1.11339	3.83965	0.000123212	0.000817709
Medtr5g018480	4.23226	1.42498	2.97005	0.00297749	0.0126413	PF00067(Cytochrome P450)	AT4G31940	cytochrome P450, family 82, subfamily C, polypeptide 4
Medtr4g068860	4.18694	0.879474	4.76073	1.92894e-06	2.10112e-05	PF00042(Globin)	AT2G16060	hemoglobin 1
Medtr3g435150	4.15459	0.577105	7.19901	6.06507e-13	2.56555e-11	PF02365(No apical meristem (NAM) protein)	AT5G61430	NAC domain containing protein 100
Medtr5g045710	4.14429	1.29051	3.21135	0.00132112	0.00632721	PF00107(Zinc-binding dehydrogenase), PF08240(Alcohol dehydrogenase GroES-like domain)	AT4G22110	GroES-like zinc-binding dehydrogenase family protein
Medtr7g090420	4.1435	1.29619	3.19667	0.00139023	0.00661633
Medtr1g056870	4.1231	1.29292	3.18897	0.00142781	0.00677205	PF04564(U-box domain)	AT3G52450	plant U-box 22
Medtr2g072910	4.121	1.26551	3.2564	0.00112833	0.00551868	PF03171(2OG-Fe(II) oxygenase superfamily)	AT1G17020	senescence-related gene 1
Medtr1g073770	4.0728	1.2628	3.22521	0.00125878	0.00607371		AT1G06137
Medtr3g026330	4.06768	1.57814	2.57751	0.00995159	0.0343794		AT5G09530	hydroxyproline-rich glycoprotein family protein
Medtr7g011950	4.03578	1.37118	2.94328	0.00324755	0.0136025	PF00319(SRF-type transcription factor (DNA-binding and dimerisation domain))	AT5G48670	AGAMOUS-like 80
Medtr1g070020	4.01153	1.35576	2.95887	0.00308765	0.01304	PF00847(AP2 domain)	AT3G23240	ethylene response factor 1
Medtr1g017840	4.00452	1.35576	2.95371	0.00313982	0.0132182		AT2G04420	Polynucleotidyl transferase, ribonuclease H-like superfamily protein
Medtr1g085750	3.97006	1.1764	3.37476	0.000738793	0.003848	PF02309(AUX/IAA family)	AT3G62100	indole-3-acetic acid inducible 30
Medtr1g090737	3.9681	1.37112	2.89407	0.00380285	0.0154851	PF00501(AMP-binding enzyme)	AT1G20510	OPC-8:0 CoA ligase1
Medtr6g027730	3.96358	0.682695	5.80579	6.40632e-09	1.21258e-07	PF07847(Protein of unknown function (DUF1637))	AT5G39890	Protein of unknown function (DUF1637)
Medtr8g077330	3.93002	1.52331	2.57992	0.00988229	0.0341801		AT4G04650	RNA-directed DNA polymerase (reverse transcriptase)-related family protein
Medtr2g105800	3.92868	1.10252	3.56335	0.000366149	0.00209862		AT3G03280
Medtr4g063500	3.92828	0.548432	7.16275	7.9073e-13	3.25132e-11	PF00903(Glyoxalase/Bleomycin resistance protein/Dioxygenase superfamily)	AT1G07645	dessication-induced 1VOC superfamily protein
Medtr5g031610	3.86804	1.31484	2.94184	0.00326272	0.0136531	PF00011(Hsp20/alpha crystallin family)	AT4G25200	mitochondrion-localized small heat shock protein 23.6
Medtr1g036490	3.86105	0.302637	12.758	2.81234e-37	3.91951e-34	PF00891(O-methyltransferase), PF08100(Dimerisation domain)	AT5G54160	O-methyltransferase 1
Medtr2g104380	3.85879	1.56712	2.46235	0.0138028	0.0450455		AT5G11090	serine-rich protein-related
Medtr6g042660	3.85198	1.36835	2.81506	0.00487683	0.0190864	PF01095(Pectinesterase)	AT3G24130	Pectin lyase-like superfamily protein
Medtr8g076880	3.84733	0.99037	3.88475	0.000102437	0.000696056	PF03765(CRAL/TRIO, N-terminal domain), PF00650(CRAL/TRIO domain)	AT4G36490	SEC14-like 12
Medtr1g075540	3.83448	0.41957	9.13908	6.29846e-20	9.16391e-18	PF04117(Mpv17 / PMP22 family )	AT4G14305	Peroxisomal membrane 22 kDa (Mpv17/PMP22) family protein
Medtr3g086880	3.82377	0.943974	4.05071	5.10614e-05	0.000378423	PF01764(Lipase (class 3))	AT5G67050	alpha/beta-Hydrolases superfamily protein
Medtr4g009340	3.81924	1.48997	2.5633	0.0103682	0.0355681	PF03140(Plant protein of unknown function)	AT3G02645	Plant protein of unknown function (DUF247)
Medtr4g086160	3.78973	1.29341	2.93002	0.00338935	0.0140608	PF00847(AP2 domain)	AT4G34410	redox responsive transcription factor 1
Medtr1g075340	3.76947	0.669315	5.63183	1.78305e-08	3.07992e-07	PF00280(Potato inhibitor I family)	AT2G38870	Serine protease inhibitor, potato inhibitor I-type family protein
Medtr3g021430	3.74627	0.763694	4.90546	9.32088e-07	1.09648e-05	PF00891(O-methyltransferase), PF08100(Dimerisation domain)	AT5G54160	O-methyltransferase 1
Medtr5g090250	3.743	0.687626	5.44338	5.22802e-08	8.10526e-07	PF00280(Potato inhibitor I family)	AT2G38870	Serine protease inhibitor, potato inhibitor I-type family protein
Medtr3g034130	3.74228	1.22399	3.05746	0.00223223	0.00992102	PF00646(F-box domain)	AT3G23880	F-box and associated interaction domains-containing protein
Medtr2g056070	3.73269	1.39049	2.68445	0.00726495	0.0264361		AT1G74055
Medtr1g048360	3.7022	1.50309	2.46305	0.013776	0.044969	PF00139(Legume lectin domain), PF00069(Protein kinase domain)	AT5G06740	Concanavalin A-like lectin protein kinase family protein
Medtr2g023830	3.69664	0.598997	6.17139	6.76932e-10	1.56279e-08		AT4G22030	F-box family protein with a domain of unknown function (DUF295)
Medtr1g056840	3.69586	1.34459	2.74868	0.00598356	0.0225673	PF04564(U-box domain)	AT3G52450	plant U-box 22
Medtr2g023660	3.67185	0.69766	5.2631	1.41647e-07	2.00044e-06		AT4G22030	F-box family protein with a domain of unknown function (DUF295)
Medtr3g058710	3.66265	1.50047	2.44101	0.0146464	0.047297		AT5G17880	disease resistance protein (TIR-NBS-LRR class)
MT4Noble_004686	3.6235	1.35293	2.67826	0.00740049	0.0268666
Medtr5g081070	3.61728	1.45554	2.48518	0.0129486	0.0426254
Medtr8g058350	3.60972	1.02546	3.52009	0.0004314	0.00241562		AT1G78780	pathogenesis-related family protein
Medtr5g019010	3.60365	1.00873	3.57247	0.00035363	0.0020379	PF00067(Cytochrome P450)	AT3G26300	cytochrome P450, family 71, subfamily B, polypeptide 34
Medtr4g094550	3.58574	0.560026	6.40281	1.52543e-10	3.99029e-09	PF07712(Stress up-regulated Nod 19)	AT5G61820
Medtr5g083500	3.58352	0.681627	5.25731	1.46179e-07	2.05567e-06		AT2G40390
Medtr4g118355	3.55939	0.320541	11.1043	1.19532e-28	7.03377e-26	PF02896(PEP-utilising enzyme, TIM barrel domain)	AT4G15530	pyruvate orthophosphate dikinase
Medtr2g068760	3.55288	0.7478	4.75111	2.02299e-06	2.18737e-05	PF03195(Protein of unknown function DUF260)	AT1G31320	LOB domain-containing protein 4
Medtr1g070185	3.52392	1.42973	2.46474	0.0137113	0.0447909	PF03171(2OG-Fe(II) oxygenase superfamily)	AT1G06620	2-oxoglutarate (2OG) and Fe(II)-dependent oxygenase superfamily protein
Medtr2g075780	3.52156	0.291013	12.101	1.04282e-33	1.02273e-30	PF07722(Peptidase C26)	AT1G78680	gamma-glutamyl hydrolase 2
Medtr4g072350	3.49741	0.640651	5.45915	4.7843e-08	7.49191e-07	PF00248(Aldo/keto reductase family)	AT1G59960	NAD(P)-linked oxidoreductase superfamily protein
Medtr4g127670	3.48914	1.42177	2.45409	0.0141243	0.0458847	PF00141(Peroxidase)	AT2G18980	Peroxidase superfamily protein
Medtr3g065080	3.48729	0.411439	8.47583	2.3341e-17	2.2807e-15	PF04564(U-box domain)	AT5G37490	ARM repeat superfamily protein
Medtr7g013610	3.48035	1.43992	2.41704	0.0156472	0.0499562	PF00125(Core histone H2A/H2B/H3/H4)	AT5G10390	Histone superfamily protein
Medtr2g020510	3.45085	1.35783	2.54145	0.0110393	0.0373907		AT3G18670	Ankyrin repeat family protein
Medtr2g047968	3.42315	1.34746	2.54044	0.0110714	0.0374851	PF01733(Nucleoside transporter)	AT4G05120	Major facilitator superfamily protein
Medtr1g102810	3.41546	0.422526	8.08343	6.29691e-16	4.79144e-14	PF00504(Chlorophyll A-B binding protein)	AT3G22840	Chlorophyll A-B binding family protein
Medtr1g115210	3.40365	1.35803	2.50631	0.0121997	0.0406299	PF00026(Eukaryotic aspartyl protease)	AT3G20015	Eukaryotic aspartyl protease family protein
Medtr7g109440	3.37616	0.858761	3.93143	8.44409e-05	0.000589816
Medtr2g029560	3.36079	0.798679	4.20793	2.57717e-05	0.00020749	PF00141(Peroxidase)	AT5G06730	Peroxidase superfamily protein
Medtr2g029750	3.35785	1.11724	3.00549	0.0026515	0.0114631	PF00141(Peroxidase)	AT2G38380	Peroxidase superfamily protein
Medtr2g031590	3.33521	0.70168	4.75318	2.00242e-06	2.16868e-05	PF01565(FAD binding domain ), PF08031(Berberine and berberine like )	AT1G30700	FAD-binding Berberine family protein
Medtr5g035610	3.32838	0.590585	5.63574	1.74309e-08	3.01681e-07
Medtr2g083920	3.31667	0.30092	11.0218	3.00103e-28	1.69079e-25	PF00226(DnaJ domain)	AT2G42750	DNAJ heat shock N-terminal domain-containing protein
Medtr4g094555	3.31496	1.31107	2.52844	0.011457	0.0385138	PF07712(Stress up-regulated Nod 19)	AT5G61820
Medtr0650s0010	3.31404	0.955212	3.46943	0.000521562	0.00284703	PF04525(LURP-one-related)	AT2G05910	Protein of unknown function (DUF567)
Medtr5g019580	3.31122	0.442997	7.47459	7.74427e-14	4.0769e-12	PF00201(UDP-glucoronosyl and UDP-glucosyl transferase)	AT3G50740	UDP-glucosyl transferase 72E1
Medtr3g101960	3.30058	0.512455	6.44071	1.18913e-10	3.2098e-09	PF02458(Transferase family)	AT5G42830	HXXXD-type acyl-transferase family protein
Medtr5g007450	3.28214	0.482236	6.80608	1.00295e-11	3.32392e-10	PF00067(Cytochrome P450)	AT2G45550	cytochrome P450, family 76, subfamily C, polypeptide 4
Medtr2g097350	3.26602	0.674071	4.84521	1.26477e-06	1.44234e-05	PF03514(GRAS domain family)	AT2G29060	GRAS family transcription factor
Medtr5g035240	3.26427	1.10984	2.94119	0.00326953	0.0136708	PF00931(NB-ARC domain)	AT3G14470	NB-ARC domain-containing disease resistance protein
Medtr6g471740	3.26321	1.02837	3.17318	0.00150777	0.00707653
Medtr1g080990	3.24445	0.267717	12.1189	8.38329e-34	8.53805e-31		AT4G14746
Medtr5g007460	3.23852	0.405608	7.98434	1.41272e-15	1.00832e-13	PF00067(Cytochrome P450)	AT2G45550	cytochrome P450, family 76, subfamily C, polypeptide 4
Medtr4g032865	3.20314	0.556161	5.75938	8.4425e-09	1.56225e-07	PF02428(Potato type II proteinase inhibitor family)	AT1G72060	serine-type endopeptidase inhibitors
Medtr1g069620	3.20182	1.09353	2.92798	0.00341177	0.0141339		AT5G49830	exocyst complex component 84B
Medtr7g063280	3.20051	0.467114	6.85167	7.29931e-12	2.4812e-10
Medtr2g023730	3.18854	0.361682	8.81587	1.18762e-18	1.41658e-16		AT4G22030	F-box family protein with a domain of unknown function (DUF295)
Medtr5g016090	3.09809	1.21083	2.55864	0.0105082	0.0358948		AT4G33910	2-oxoglutarate (2OG) and Fe(II)-dependent oxygenase superfamily protein
Medtr2g100450	3.06118	0.663757	4.6119	3.99006e-06	4.00215e-05	PF00069(Protein kinase domain), PF00560(Leucine Rich Repeat)	AT4G29990	Leucine-rich repeat transmembrane protein kinase protein
Medtr5g075650	3.05372	0.375487	8.1327	4.19847e-16	3.26028e-14	PF00560(Leucine Rich Repeat), PF00069(Protein kinase domain)	AT1G06840	Leucine-rich repeat protein kinase family protein
Medtr4g019225	3.05325	0.613976	4.97292	6.59524e-07	7.99341e-06	PF07732(Multicopper oxidase), PF00394(Multicopper oxidase), PF07731(Multicopper oxidase)	AT3G09220	laccase 7
Medtr8g076290	3.05315	0.238952	12.7772	2.19795e-37	3.23344e-34	PF00067(Cytochrome P450)	AT4G36220	ferulic acid 5-hydroxylase 1
Medtr5g040430	3.02468	0.706018	4.28413	1.83453e-05	0.000153584	PF02798(Glutathione S-transferase, N-terminal domain)	AT5G62480	glutathione S-transferase tau 9
Medtr1g019590	3.0158	0.801668	3.7619	0.000168627	0.0010685
Medtr2g097390	3.00193	0.510199	5.88385	4.0084e-09	7.91518e-08	PF03514(GRAS domain family)	AT1G07530	SCARECROW-like 14
Medtr2g023790	2.99524	0.353813	8.46559	2.54854e-17	2.46296e-15		AT4G22030	F-box family protein with a domain of unknown function (DUF295)
Medtr4g036150	2.99478	0.955485	3.1343	0.00172265	0.00793731		AT4G13010	Oxidoreductase, zinc-binding dehydrogenase family protein
Medtr6g043240	2.99294	1.02429	2.92196	0.00347842	0.0143561	PF00141(Peroxidase)	AT1G71695	Peroxidase superfamily protein
Medtr5g058530	2.98821	1.18344	2.52503	0.0115688	0.0388168	PF00097(Zinc finger, C3HC4 type (RING finger))	AT1G60360	RING/U-box superfamily protein
Medtr2g435490	2.98414	0.481702	6.195	5.82846e-10	1.3598e-08	PF00188(Cysteine-rich secretory protein family)	AT2G14610	pathogenesis-related gene 1
Medtr5g071410	2.98034	1.02285	2.91376	0.00357108	0.0146904
Medtr2g031600	2.96365	0.539557	5.49276	3.95709e-08	6.2971e-07	PF08031(Berberine and berberine like ), PF01565(FAD binding domain )	AT5G44400	FAD-binding Berberine family protein
Medtr7g100100	2.93179	0.399576	7.33725	2.18027e-13	1.03095e-11		AT2G37430	C2H2 and C2HC zinc fingers superfamily protein
Medtr5g010640	2.93099	0.524008	5.59341	2.22658e-08	3.7578e-07	PF00314(Thaumatin family)	AT4G11650	osmotin 34
Medtr7g093090	2.9202	0.997908	2.92632	0.00342995	0.0141959	PF08743(Nse4 C-terminal)	AT1G51130	Nse4, component of Smc5/6 DNA repair complex
Medtr1g056880	2.91931	0.767506	3.80363	0.000142593	0.000925001	PF04564(U-box domain)	AT3G52450	plant U-box 22
Medtr3g072560	2.91916	0.839679	3.47652	0.000507973	0.00278318	PF00892(EamA-like transporter family)	AT4G08290	nodulin MtN21 /EamA-like transporter family protein
Medtr8g083520	2.90775	0.368172	7.89781	2.8385e-15	1.92727e-13	PF00171(Aldehyde dehydrogenase family)	AT3G24503	aldehyde dehydrogenase 2C4
Medtr7g075620	2.90618	0.734021	3.95927	7.51802e-05	0.000531297
MT4Noble_019329	2.90558	1.0075	2.88394	0.00392731	0.0159058
Medtr1g100763	2.8812	0.947891	3.03959	0.00236902	0.010431	PF07734(F-box associated), PF00646(F-box domain)	AT2G04920	F-box and associated interaction domains-containing protein
Medtr3g063310	2.87497	0.289901	9.91708	3.50863e-23	8.44623e-21	PF03168(Late embryogenesis abundant protein)	AT1G65690	Late embryogenesis abundant (LEA) hydroxyproline-rich glycoprotein family
Medtr3g083760	2.85691	0.680651	4.19732	2.70088e-05	0.000216725	PF00234(Protease inhibitor/seed storage/LTP family)	AT1G55260	Bifunctional inhibitor/lipid-transfer protein/seed storage 2S albumin superfamily protein
Medtr5g023120	2.85038	1.14046	2.49933	0.012443	0.0412867	PF08137(DVL family)	AT4G35783	ROTUNDIFOLIA like 6
Medtr1g102830	2.83473	0.472108	6.00441	1.92033e-09	4.06153e-08	PF00504(Chlorophyll A-B binding protein)	AT3G22840	Chlorophyll A-B binding family protein
Medtr4g094772	2.81941	0.27708	10.1754	2.55313e-24	6.96978e-22	PF00067(Cytochrome P450)	AT4G37370	cytochrome P450, family 81, subfamily D, polypeptide 8
Medtr5g088770	2.78285	0.506662	5.49253	3.96216e-08	6.30138e-07	PF00031(Cystatin domain)	AT3G12490	cystatin B
Medtr2g023650	2.78004	0.259847	10.6988	1.03155e-26	3.90221e-24		AT4G22030	F-box family protein with a domain of unknown function (DUF295)
Medtr1g037580	2.76707	0.604972	4.57388	4.78764e-06	4.7164e-05	PF00067(Cytochrome P450)	AT2G29090	cytochrome P450, family 707, subfamily A, polypeptide 2
Medtr5g006950	2.7602	1.01341	2.72367	0.00645611	0.0240244	PF00234(Protease inhibitor/seed storage/LTP family)	AT3G22600	Bifunctional inhibitor/lipid-transfer protein/seed storage 2S albumin superfamily protein
Medtr2g082590	2.75707	0.478985	5.75608	8.6092e-09	1.59024e-07	PF00085(Thioredoxin)	AT1G11530	C-terminal cysteine residue is changed to a serine 1
Medtr7g112560	2.75451	0.565513	4.87082	1.11138e-06	1.28456e-05	PF00646(F-box domain)	AT1G09155	phloem protein 2-B15
Medtr2g097310	2.75374	0.587535	4.68693	2.77335e-06	2.89241e-05	PF03514(GRAS domain family)	AT1G07530	SCARECROW-like 14
Medtr3g464700	2.75348	0.954268	2.88543	0.00390873	0.0158528	PF00481(Protein phosphatase 2C)	AT2G30020	Protein phosphatase 2C family protein
Medtr7g068650	2.7419	0.414438	6.61595	3.69182e-11	1.09129e-09	PF03171(2OG-Fe(II) oxygenase superfamily)	AT5G05600	2-oxoglutarate (2OG) and Fe(II)-dependent oxygenase superfamily protein
Medtr3g095680	2.73467	0.586956	4.65907	3.17649e-06	3.26908e-05	PF00069(Protein kinase domain)	AT1G49160	Protein kinase superfamily protein
Medtr1g076930	2.72552	0.796642	3.42126	0.000623323	0.00331904	PF00891(O-methyltransferase), PF08100(Dimerisation domain)	AT4G35160	O-methyltransferase family protein
Medtr4g126160	2.72251	0.410845	6.62662	3.43468e-11	1.02191e-09	PF01565(FAD binding domain ), PF09265(Cytokinin dehydrogenase 1, FAD and cytokinin binding)	AT5G56970	cytokinin oxidase 3
Medtr0010s0050	2.71922	0.423588	6.4195	1.36725e-10	3.63137e-09	PF00097(Zinc finger, C3HC4 type (RING finger))	AT5G40250	RING/U-box superfamily protein
MT4Noble_027564	2.71331	0.661565	4.10135	4.10752e-05	0.000313359
Medtr7g009790	2.69129	0.34754	7.74384	9.64617e-15	5.96801e-13	PF08263(Leucine rich repeat N-terminal domain), PF00560(Leucine Rich Repeat)	AT3G05650	receptor like protein 32
Medtr7g025130	2.68247	1.02228	2.62401	0.00869001	0.0307102	PF07649(C1-like domain), PF03107(C1 domain)	AT2G16050	Cysteine/Histidine-rich C1 domain family protein
Medtr6g059410	2.66438	0.513166	5.19205	2.07991e-07	2.82732e-06	PF00197(Trypsin and protease inhibitor)	AT1G73260	kunitz trypsin inhibitor 1
Medtr1g016170	2.66258	0.248938	10.6957	1.06561e-26	3.97428e-24	PF00320(GATA zinc finger)	AT5G56860	GATA type zinc finger transcription factor family protein
Medtr8g096910	2.65825	0.37466	7.0951	1.29254e-12	5.15894e-11	PF00314(Thaumatin family)	AT4G11650	osmotin 34
Medtr4g104570	2.65419	0.331423	8.00845	1.16161e-15	8.52065e-14	PF00067(Cytochrome P450)	AT3G48280	cytochrome P450, family 71, subfamily A, polypeptide 25
Medtr8g022340	2.65165	0.885061	2.99601	0.00273541	0.0117683	PF02519(Auxin responsive protein)	AT1G19840	SAUR-like auxin-responsive protein family
Medtr6g036450	2.64659	0.33134	7.98754	1.3766e-15	9.87873e-14	PF00892(EamA-like transporter family)	AT1G43650	nodulin MtN21 /EamA-like transporter family protein
Medtr8g010530	2.63402	0.726158	3.62734	0.000286352	0.00170051	PF03094(Mlo family)	AT4G02600	Seven transmembrane MLO family protein
Medtr1g027170	2.62872	0.799383	3.28844	0.00100745	0.005007
Medtr7g074865	2.62316	0.548277	4.78437	1.71523e-06	1.898e-05	PF01370(NAD dependent epimerase/dehydratase family)	AT4G35420	dihydroflavonol 4-reductase-like1
Medtr3g103190	2.61868	0.277075	9.45115	3.35134e-21	6.03697e-19		AT1G59590	ZCF37
MT4Noble_029526	2.60802	0.717688	3.63393	0.000279141	0.00166366
Medtr4g104540	2.60724	0.256386	10.1692	2.72061e-24	7.35119e-22	PF00067(Cytochrome P450)	AT3G48280	cytochrome P450, family 71, subfamily A, polypeptide 25
Medtr1g050145	2.59063	0.855815	3.02709	0.0024692	0.0108109	PF01535(PPR repeat)	AT1G66345	Pentatricopeptide repeat (PPR) superfamily protein
Medtr2g022560	2.58541	0.373014	6.93115	4.1743e-12	1.50593e-10	PF03005()	AT3G06080	Plant protein of unknown function (DUF828)
Medtr8g058780	2.57387	0.538183	4.78252	1.73115e-06	1.91402e-05	PF06325(Ribosomal protein L11 methyltransferase (PrmA))	AT5G53920	ribosomal protein L11 methyltransferase-related
Medtr3g025230	2.56754	0.348086	7.37615	1.62931e-13	7.94549e-12	PF00067(Cytochrome P450)	AT5G07990	Cytochrome P450 superfamily protein
Medtr7g103200	2.53122	0.763071	3.31715	0.000909395	0.00459557	PF04398(Protein of unknown function, DUF538)	AT1G09310	Protein of unknown function, DUF538
Medtr7g011900	2.52819	0.338347	7.47216	7.88866e-14	4.13647e-12	PF00891(O-methyltransferase), PF08100(Dimerisation domain)	AT5G54160	O-methyltransferase 1
Medtr1g079760	2.51995	0.579225	4.35056	1.35792e-05	0.000118204	PF00909(Ammonium Transporter Family)	AT1G64780	ammonium transporter 1;2
Medtr3g108990	2.51812	0.912728	2.7589	0.00579965	0.0219801	PF01266(FAD dependent oxidoreductase)	AT2G24580	FAD-dependent oxidoreductase family protein
Medtr4g118480	2.51318	0.393982	6.37891	1.78357e-10	4.6167e-09	PF05078(Protein of unknown function (DUF679))	AT3G21550	DUF679 domain membrane protein 2
Medtr7g065710	2.50848	0.840552	2.98433	0.00284201	0.012146	PF02798(Glutathione S-transferase, N-terminal domain), PF00043(Glutathione S-transferase, C-terminal domain)	AT3G09270	glutathione S-transferase TAU 8
Medtr8g076910	2.49367	0.885849	2.81501	0.00487757	0.0190865	PF01582(TIR domain), PF00931(NB-ARC domain)	AT5G17680	disease resistance protein (TIR-NBS-LRR class), putative
Medtr2g035130	2.48609	0.684368	3.63268	0.000280489	0.00167108	PF00407(Pathogenesis-related protein Bet v I family)
Medtr1g102780	2.48596	0.277519	8.95779	3.3125e-19	4.34232e-17	PF00504(Chlorophyll A-B binding protein)	AT3G22840	Chlorophyll A-B binding family protein
Medtr1g028890	2.48079	0.796162	3.11593	0.00183366	0.00837162	PF07714(Protein tyrosine kinase), PF08263(Leucine rich repeat N-terminal domain)	AT4G23740	Leucine-rich repeat protein kinase family protein
Medtr8g061260	2.47928	0.527311	4.70174	2.57954e-06	2.71164e-05	PF06325(Ribosomal protein L11 methyltransferase (PrmA))	AT5G53920	ribosomal protein L11 methyltransferase-related
Medtr6g012830	2.47566	0.423636	5.84383	5.10135e-09	9.86732e-08	PF09366(Protein of unknown function (DUF1997))	AT5G39530	Protein of unknown function (DUF1997)
Medtr4g083140	2.46944	0.577877	4.2733	1.92603e-05	0.00016023
Medtr4g104550	2.46366	0.305282	8.07012	7.02269e-16	5.29803e-14	PF00067(Cytochrome P450)	AT3G48280	cytochrome P450, family 71, subfamily A, polypeptide 25
Medtr2g096120	2.44612	0.520006	4.70403	2.5508e-06	2.68676e-05		AT5G02640
Medtr3g114750	2.44185	0.4364	5.59543	2.20076e-08	3.72134e-07		AT1G76070
Medtr3g090350	2.43966	0.352326	6.92444	4.37711e-12	1.57267e-10	PF05678(VQ motif)	AT1G21326	VQ motif-containing protein
Medtr2g028580	2.43458	0.971353	2.50638	0.0121975	0.0406299	PF00069(Protein kinase domain)	AT5G49760	Leucine-rich repeat protein kinase family protein
Medtr3g111530	2.42806	0.64005	3.79355	0.000148508	0.000957744	PF00067(Cytochrome P450)	AT5G42650	allene oxide synthase
Medtr2g089530	2.41447	0.870099	2.77493	0.00552127	0.0211578		AT4G28100
Medtr1g017830	2.41427	0.341776	7.0639	1.61898e-12	6.31377e-11		AT1G10140	Uncharacterised conserved protein UCP031279
Medtr4g086190	2.39994	0.591665	4.05625	4.9867e-05	0.000371442	PF00847(AP2 domain)	AT4G34410	redox responsive transcription factor 1
Medtr3g064260	2.39949	0.759466	3.15944	0.00158073	0.0073719	PF03126(Plus-3 domain), PF02201(SWIB/MDM2 domain)	AT5G63700	zinc ion binding;DNA binding
Medtr8g104290	2.38947	0.534144	4.47345	7.69692e-06	7.15892e-05		AT1G48780
Medtr6g016820	2.38521	0.236698	10.077	6.98053e-24	1.83014e-21	PF03639(Glycosyl hydrolase family 81 )	AT5G15870	glycosyl hydrolase family 81 protein
Medtr0131s0030	2.36465	0.405481	5.83171	5.48629e-09	1.05733e-07
Medtr4g051000	2.36151	0.862063	2.73937	0.00615566	0.0231208		AT4G28100
Medtr4g108760	2.36085	0.29204	8.08399	6.26805e-16	4.78323e-14	PF02365(No apical meristem (NAM) protein)	AT5G61430	NAC domain containing protein 100
Medtr3g105510	2.36049	0.874675	2.69871	0.00696091	0.0255368	PF00847(AP2 domain)	AT1G74930	Integrase-type DNA-binding superfamily protein
Medtr6g007767	2.3579	0.65679	3.59004	0.00033063	0.00192208	PF03098(Animal haem peroxidase)	AT3G01420	Peroxidase superfamily protein
Medtr5g009870	2.35713	0.618519	3.81092	0.000138452	0.000902121		AT1G64080
Medtr3g051220	2.35614	0.427472	5.5118	3.55187e-08	5.73147e-07	PF10520(B domain of TMEM189, localisation domain)	AT4G27030	fatty acid desaturase A
Medtr3g049150	2.35354	0.437338	5.38151	7.38627e-08	1.1069e-06	PF02458(Transferase family)	AT2G19070	spermidine hydroxycinnamoyl transferase
Medtr7g063270	2.34837	0.288328	8.1448	3.79908e-16	2.99404e-14	PF00106(short chain dehydrogenase)	AT5G06060	NAD(P)-binding Rossmann-fold superfamily protein
Medtr2g015750	2.34834	0.394882	5.94694	2.73204e-09	5.6081e-08
Medtr4g132000	2.34344	0.321067	7.2989	2.90123e-13	1.32001e-11
Medtr3g479470	2.33883	0.385082	6.07359	1.25086e-09	2.74194e-08	PF00201(UDP-glucoronosyl and UDP-glucosyl transferase)	AT1G22400	UDP-Glycosyltransferase superfamily protein
Medtr3g088520	2.33776	0.391766	5.96723	2.41322e-09	5.00409e-08	PF01301(Glycosyl hydrolases family 35)	AT1G77410	beta-galactosidase 16
Medtr1g072380	2.33665	0.71256	3.27923	0.0010409	0.00515102		AT1G03220	Eukaryotic aspartyl protease family protein
Medtr6g009510	2.33632	0.685567	3.40787	0.000654721	0.00346038	PF00004(ATPase family associated with various cellular activities (AAA))	AT5G40010	AAA-ATPase 1
Medtr7g014510	2.33357	0.286723	8.13875	3.99384e-16	3.12891e-14	PF08100(Dimerisation domain), PF00891(O-methyltransferase)	AT4G35150	O-methyltransferase family protein
Medtr4g118470	2.32867	0.441871	5.27003	1.36404e-07	1.93257e-06	PF05078(Protein of unknown function (DUF679))	AT3G21550	DUF679 domain membrane protein 2
MT4Noble_046169	2.32127	0.940124	2.46911	0.013545	0.0443243
Medtr4g119790	2.31873	0.329488	7.03738	1.95882e-12	7.46325e-11		AT5G24860	flowering promoting factor 1
Medtr6g046930	2.31427	0.330173	7.00925	2.39606e-12	9.02529e-11	PF05630(Necrosis inducing protein (NPP1)), PF00931(NB-ARC domain)	AT3G14470	NB-ARC domain-containing disease resistance protein
Medtr8g041390	2.30146	0.262333	8.77307	1.73867e-18	2.03717e-16	PF00892(EamA-like transporter family)	AT5G07050	nodulin MtN21 /EamA-like transporter family protein
Medtr2g035150	2.29622	0.607186	3.78174	0.000155737	0.000997722	PF00407(Pathogenesis-related protein Bet v I family)
Medtr7g108420	2.28626	0.918412	2.48937	0.0127971	0.0422211	PF00464(Serine hydroxymethyltransferase)	AT4G32520	serine hydroxymethyltransferase 3
Medtr7g105670	2.28564	0.892738	2.56025	0.0104596	0.0357795
Medtr3g054330	2.27347	0.591921	3.84084	0.000122615	0.000814355	PF03492(SAM dependent carboxyl methyltransferase)	AT5G55250	IAA carboxylmethyltransferase 1
Medtr7g106340	2.26813	0.530572	4.27489	1.91232e-05	0.000159342	PF04564(U-box domain)	AT3G52450	plant U-box 22
Medtr2g068880	2.26671	0.314583	7.20544	5.78553e-13	2.46303e-11	PF02365(No apical meristem (NAM) protein)	AT2G43000	NAC domain containing protein 42
Medtr5g090910	2.26303	0.3631	6.23251	4.59011e-10	1.09304e-08	PF00043(Glutathione S-transferase, C-terminal domain)	AT2G30860	glutathione S-transferase PHI 9
Medtr5g065600	2.25973	0.521983	4.32912	1.49703e-05	0.00012879
Medtr7g098750	2.25723	0.666572	3.38633	0.000708348	0.00370839	PF01061(ABC-2 type transporter), PF08370(Plant PDR ABC transporter associated), PF00005(ABC transporter)	AT1G15520	pleiotropic drug resistance 12
Medtr3g048590	2.25357	0.918828	2.45266	0.0141804	0.0460339	PF00560(Leucine Rich Repeat), PF08263(Leucine rich repeat N-terminal domain)	AT3G28890	receptor like protein 43
Medtr1g037680	2.25174	0.301487	7.4688	8.09308e-14	4.23527e-12	PF00085(Thioredoxin)	AT3G06730	Thioredoxin z
Medtr7g110580	2.23026	0.378115	5.89836	3.67127e-09	7.31491e-08		AT1G75250	RAD-like 6
Medtr5g010940	2.22876	0.739704	3.01304	0.00258648	0.0112316	PF00847(AP2 domain)	AT1G12610	Integrase-type DNA-binding superfamily protein
Medtr3g092635	2.22817	0.81048	2.7492	0.00597407	0.0225471
Medtr7g068430	2.22438	0.500616	4.44329	8.85926e-06	8.08106e-05
Medtr6g033890	2.22385	0.668694	3.32567	0.000882071	0.00447371
Medtr3g117825	2.21796	0.68275	3.24857	0.00115985	0.00565405		AT1G35515	high response to osmotic stress 10
Medtr7g113980	2.21766	0.81684	2.71493	0.00662907	0.0245748	PF07714(Protein tyrosine kinase)	AT3G05140	ROP binding protein kinases 2
Medtr2g079000	2.21295	0.696858	3.17561	0.00149524	0.00702868	PF04935(Surfeit locus protein 6)	AT5G05210	Surfeit locus protein 6
Medtr2g023010	2.21215	0.304462	7.26577	3.70924e-13	1.65355e-11		AT3G20340
Medtr4g099510	2.20981	0.587791	3.75952	0.000170242	0.0010777	PF01764(Lipase (class 3))	AT4G16820	alpha/beta-Hydrolases superfamily protein
MT4Noble_014659	2.19512	0.66357	3.30804	0.000939501	0.00472606
Medtr4g114870	2.19246	0.373237	5.87417	4.24971e-09	8.31724e-08	PF02298(Plastocyanin-like domain)	AT1G45063	copper ion binding;electron carriers
Medtr7g101740	2.19119	0.621596	3.5251	0.000423323	0.00238248	PF02519(Auxin responsive protein)	AT2G37030	SAUR-like auxin-responsive protein family
Medtr4g086220	2.18994	0.855463	2.55995	0.0104687	0.0357969	PF00847(AP2 domain)	AT4G34410	redox responsive transcription factor 1
Medtr7g069980	2.18244	0.628776	3.47094	0.000518645	0.00283403	PF00210(Ferritin-like domain)	AT5G01600	ferretin 1
Medtr8g086820	2.17621	0.300041	7.25303	4.07555e-13	1.79868e-11	PF07939(Protein of unknown function (DUF1685))	AT2G42760
Medtr7g109420	2.17111	0.396815	5.47133	4.46677e-08	7.02792e-07		AT3G03280
Medtr2g070550	2.16967	0.712218	3.04636	0.0023163	0.0102328	PF05678(VQ motif)	AT1G17147	VQ motif-containing protein
Medtr5g069230	2.16753	0.66646	3.2523	0.00114474	0.00558658
Medtr4g132380	2.16406	0.555439	3.89612	9.77477e-05	0.000668481		AT4G04480
Medtr1g014510	2.16183	0.285255	7.57857	3.49376e-14	1.93545e-12	PF00892(EamA-like transporter family)	AT5G40240	nodulin MtN21 /EamA-like transporter family protein
Medtr1g015980	2.15255	0.305423	7.04777	1.81805e-12	7.00472e-11	PF08244(Glycosyl hydrolases family 32 C terminal), PF00251(Glycosyl hydrolases family 32 N-terminal domain)	AT3G13790	Glycosyl hydrolases family 32 protein
Medtr1g047620	2.13678	0.712815	2.99766	0.0027206	0.0117141
Medtr4g128470	2.13645	0.39521	5.40586	6.44974e-08	9.77055e-07		AT5G57510
Medtr8g089825	2.12715	0.686645	3.09788	0.00194908	0.00883156
Medtr2g055430	2.11963	0.573534	3.69574	0.000219246	0.0013489	PF00067(Cytochrome P450)	AT3G14690	cytochrome P450, family 72, subfamily A, polypeptide 15
Medtr4g099260	2.1186	0.47711	4.44049	8.97555e-06	8.17306e-05	PF02705(K+ potassium transporter)	AT4G13420	high affinity K+ transporter 5
Medtr7g028020	2.11589	0.488099	4.33496	1.4579e-05	0.000125914	PF00067(Cytochrome P450)	AT5G06900	cytochrome P450, family 93, subfamily D, polypeptide 1
Medtr7g109580	2.11243	0.560852	3.76646	0.000165582	0.00105197	PF03514(GRAS domain family)	AT3G03450	RGA-like 2
Medtr2g101090	2.10964	0.274857	7.67543	1.64859e-14	9.81002e-13	PF01061(ABC-2 type transporter), PF08370(Plant PDR ABC transporter associated), PF00005(ABC transporter)	AT1G59870	ABC-2 and Plant PDR ABC-type transporter family protein
Medtr2g034340	2.10546	0.481903	4.36906	1.24782e-05	0.000109829
Medtr1g099470	2.0969	0.816192	2.56912	0.0101957	0.0350262	PF00004(ATPase family associated with various cellular activities (AAA))	AT4G28000	P-loop containing nucleoside triphosphate hydrolases superfamily protein
Medtr5g088410	2.0951	0.618801	3.38575	0.000709842	0.00371475		AT3G13230	RNA-binding KH domain-containing protein
Medtr7g020980	2.08866	0.307729	6.78734	1.1422e-11	3.71567e-10	PF00847(AP2 domain)	AT5G13330	related to AP2 6l
Medtr7g009820	2.08805	0.560182	3.72745	0.000193425	0.00120657	PF01011(PQQ enzyme repeat), PF10527()
Medtr4g118800	2.08655	0.533412	3.91171	9.16442e-05	0.000633317	PF04535(Domain of unknown function (DUF588))	AT4G15610	Uncharacterised protein family (UPF0497)
Medtr6g033895	2.08648	0.542621	3.84519	0.000120459	0.00080185	PF07714(Protein tyrosine kinase)	AT5G50180	Protein kinase superfamily protein
Medtr8g077290	2.08644	0.71832	2.9046	0.00367717	0.0150381	PF00561(alpha/beta hydrolase fold)	AT2G18360	alpha/beta-Hydrolases superfamily protein
MT4Noble_006312	2.0792	0.770784	2.69751	0.00698597	0.0256004
Medtr8g038620	2.07786	0.786416	2.64219	0.00823712	0.0293832	PF00072(Response regulator receiver domain)	AT2G41310	response regulator 3
Medtr6g071340	2.07377	0.311433	6.65878	2.76111e-11	8.30842e-10	PF04564(U-box domain)	AT5G37490	ARM repeat superfamily protein
Medtr3g115600	2.06669	0.313942	6.58305	4.60883e-11	1.33233e-09	PF00724(NADH:flavin oxidoreductase / NADH oxidase family)	AT1G76680	12-oxophytodienoate reductase 1
Medtr3g078860	2.06171	0.191871	10.7453	6.23889e-27	2.54163e-24	PF02777(Iron/manganese superoxide dismutases, C-terminal domain), PF00081(Iron/manganese superoxide dismutases, alpha-hairpin domain)	AT5G23310	Fe superoxide dismutase 3
Medtr4g069810	2.0557	0.458372	4.48478	7.29884e-06	6.84395e-05	PF10950(Protein of unknown function (DUF2775))
Medtr8g103233	2.05557	0.546936	3.75833	0.00017105	0.00108229	PF00854(POT family)	AT3G16180	Major facilitator superfamily protein
Medtr1173s0010	2.054	0.563676	3.64393	0.000268501	0.00160785	PF00403(Heavy-metal-associated domain)	AT1G01490	Heavy metal transport/detoxification superfamily protein
Medtr7g079320	2.05249	0.492076	4.17108	3.03161e-05	0.000240422	PF00069(Protein kinase domain), PF01476(LysM domain)	AT1G16120	wall associated kinase-like 1
Medtr7g055660	2.04782	0.537455	3.81021	0.00013885	0.000903376	PF00856(SET domain)	AT4G02020	SET domain-containing protein
Medtr2g073010	2.04633	0.394736	5.18403	2.17142e-07	2.93963e-06	PF00197(Trypsin and protease inhibitor)	AT1G17860	Kunitz family trypsin and protease inhibitor protein
Medtr3g092425	2.04527	0.367175	5.57028	2.54329e-08	4.24899e-07
Medtr2g010450	2.04403	0.745887	2.7404	0.00613639	0.0230583	PF00010(Helix-loop-helix DNA-binding domain)	AT4G37850	basic helix-loop-helix (bHLH) DNA-binding superfamily protein
Medtr4g094570	2.03773	0.660454	3.08534	0.00203316	0.00916083	PF07712(Stress up-regulated Nod 19)	AT5G61820
Medtr4g124160	2.03151	0.585115	3.47198	0.000516633	0.00282421
Medtr7g035095	2.03002	0.341565	5.94329	2.79353e-09	5.72058e-08		AT5G62960
MT4Noble_046690	2.02602	0.652267	3.10612	0.00189558	0.00861863
Medtr1g104555	2.02471	0.527859	3.8357	0.000125205	0.000829687	PF00069(Protein kinase domain), PF00954(S-locus glycoprotein domain), PF01453(D-mannose binding lectin)	AT5G60900	receptor-like protein kinase 1
Medtr3g117690	2.02184	0.720498	2.80616	0.00501351	0.0195491	PF04833(COBRA-like protein)	AT3G29810	COBRA-like protein 2 precursor
Medtr4g009510	2.02051	0.365795	5.52361	3.32097e-08	5.39836e-07		AT4G37850	basic helix-loop-helix (bHLH) DNA-binding superfamily protein
Medtr4g099010	2.01521	0.583911	3.45122	0.000558054	0.00301577	PF04043(Plant invertase/pectin methylesterase inhibitor)	AT5G46960	Plant invertase/pectin methylesterase inhibitor superfamily protein
Medtr1g069940	2.01147	0.593541	3.38892	0.000701681	0.00367858	PF00847(AP2 domain)	AT3G23240	ethylene response factor 1
Medtr3g104030	2.00948	0.276661	7.26332	3.77692e-13	1.67807e-11	PF03080(Domain of unknown function (DUF239))	AT5G25950	Protein of Unknown Function (DUF239)
Medtr2g072400	2.00453	0.482767	4.15216	3.29348e-05	0.000258174	PF00067(Cytochrome P450)	AT3G14690	cytochrome P450, family 72, subfamily A, polypeptide 15
Medtr4g014970	2.00179	0.573623	3.48973	0.000483512	0.00266626	PF06127(Protein of unknown function (DUF962))	AT3G09085	Protein of unknown function (DUF962)
Medtr7g065265	2.00025	0.297631	6.72057	1.81017e-11	5.62599e-10	PF02798(Glutathione S-transferase, N-terminal domain), PF00043(Glutathione S-transferase, C-terminal domain)	AT3G09270	glutathione S-transferase TAU 8
Medtr6g012640	1.99637	0.195005	10.2375	1.34634e-24	3.83346e-22		AT3G29034
Medtr8g106150	1.99593	0.127083	15.7057	1.38204e-55	7.31926e-52	PF00512(His Kinase A (phospho-acceptor) domain), PF03924(CHASE domain), PF00072(Response regulator receiver domain), PF02518(Histidine kinase-, DNA gyrase B-, and HSP90-like ATPase)	AT2G01830	CHASE domain containing histidine kinase protein
Medtr3g434920	1.99321	0.744546	2.67708	0.00742661	0.0269466		AT1G01490	Heavy metal transport/detoxification superfamily protein
Medtr1g111300	1.99122	0.543906	3.66096	0.000251271	0.00151806
Medtr2g064940	1.99089	0.670502	2.96926	0.0029852	0.012666	PF00069(Protein kinase domain)	AT1G16670	Protein kinase superfamily protein
Medtr3g058390	1.98888	0.513726	3.87147	0.000108181	0.000730027	PF00067(Cytochrome P450)	AT3G26310	cytochrome P450, family 71, subfamily B, polypeptide 35
Medtr1g102800	1.98823	0.382594	5.19672	2.02839e-07	2.76579e-06	PF00504(Chlorophyll A-B binding protein)	AT3G22840	Chlorophyll A-B binding family protein
MT4Noble_054194	1.98765	0.521211	3.81352	0.000136999	0.000894411
Medtr7g114020	1.98724	0.340747	5.83202	5.4762e-09	1.05615e-07	PF01627(Hpt domain)	AT1G03430	histidine-containing phosphotransfer factor 5
Medtr1g029150	1.98498	0.564051	3.51915	0.000432926	0.00242233	PF03405(Fatty acid desaturase)	AT1G43800	Plant stearoyl-acyl-carrier-protein desaturase family protein
Medtr1g044155	1.96912	0.47012	4.18856	2.80733e-05	0.000224247	PF03479(Domain of unknown function (DUF296))	AT4G14465	AT-hook motif nuclear-localized protein 20
Medtr5g043880	1.96732	0.289917	6.7858	1.15442e-11	3.75079e-10	PF03106(WRKY DNA -binding domain)	AT1G69310	WRKY DNA-binding protein 57
Medtr7g077160	1.96418	0.519481	3.78104	0.000156172	0.000999379	PF00228(Bowman-Birk serine protease inhibitor family)
Medtr5g007550	1.96167	0.766815	2.5582	0.0105215	0.0359207	PF00067(Cytochrome P450)	AT2G45550	cytochrome P450, family 76, subfamily C, polypeptide 4
Medtr7g102550	1.95573	0.423516	4.61784	3.87755e-06	3.90261e-05	PF00201(UDP-glucoronosyl and UDP-glucosyl transferase)	AT2G36780	UDP-Glycosyltransferase superfamily protein
Medtr1g088620	1.95549	0.72715	2.68925	0.00716134	0.026149	PF00582(Universal stress protein family), PF04434(SWIM zinc finger)	AT2G47710	Adenine nucleotide alpha hydrolases-like superfamily protein
Medtr1g045610	1.95079	0.783617	2.48946	0.0127936	0.0422148	PF00249(Myb-like DNA-binding domain)	AT3G24310	myb domain protein 305
Medtr8g098485	1.94778	0.384549	5.0651	4.08192e-07	5.18911e-06	PF02214(BTB/POZ domain)	AT5G41330	BTB/POZ domain with WD40/YVTN repeat-like protein
Medtr7g012250	1.94574	0.377319	5.15675	2.51274e-07	3.35708e-06	PF00782(Dual specificity phosphatase, catalytic domain), PF10409(C2 domain of PTEN tumour-suppressor protein)	AT5G39400	Calcium/lipid-binding (CaLB) phosphatase
Medtr6g012970	1.9445	0.511105	3.8045	0.00014209	0.000922483	PF00847(AP2 domain)	AT5G19790	related to AP2 11
Medtr8g096500	1.94115	0.707241	2.74468	0.00605706	0.0228087	PF02519(Auxin responsive protein)	AT5G50760	SAUR-like auxin-responsive protein family
Medtr1g088640	1.9381	0.28834	6.72159	1.79753e-11	5.59326e-10	PF00582(Universal stress protein family)	AT2G47710	Adenine nucleotide alpha hydrolases-like superfamily protein
Medtr2g096210	1.93329	0.198413	9.74373	1.96225e-22	4.20268e-20	PF08392(FAE1/Type III polyketide synthase-like protein), PF08541(3-Oxoacyl-[acyl-carrier-protein (ACP)] synthase III C terminal )	AT2G28630	3-ketoacyl-CoA synthase 12
Medtr2g064400	1.93141	0.361758	5.33897	9.34771e-08	1.37134e-06	PF00646(F-box domain)	AT3G60790	F-box family protein
Medtr3g463730	1.92927	0.362842	5.3171	1.05432e-07	1.52476e-06	PF00909(Ammonium Transporter Family)	AT1G64780	ammonium transporter 1;2
Medtr5g013230	1.9289	0.234775	8.21593	2.10524e-16	1.71529e-14	PF01764(Lipase (class 3))	AT4G16820	alpha/beta-Hydrolases superfamily protein
Medtr8g041330	1.92557	0.71236	2.70308	0.00686999	0.0252838	PF01633(Choline/ethanolamine kinase)	AT1G74320	Protein kinase superfamily protein
Medtr5g010930	1.92278	0.631126	3.04659	0.00231455	0.0102268	PF00847(AP2 domain)	AT1G12610	Integrase-type DNA-binding superfamily protein
MT4Noble_019825	1.91642	0.335892	5.70545	1.16036e-08	2.08739e-07
Medtr5g097300	1.91611	0.380419	5.03685	4.73252e-07	5.92235e-06		AT4G16447
Medtr5g010635	1.91558	0.261327	7.3302	2.29816e-13	1.07708e-11	PF00314(Thaumatin family)	AT4G11650	osmotin 34
Medtr3g078410	1.91545	0.48744	3.92962	8.50794e-05	0.000593493	PF05089(Alpha-N-acetylglucosaminidase (NAGLU) tim-barrel domain)	AT5G13690	alpha-N-acetylglucosaminidase family / NAGLU family
Medtr3g034370	1.91484	0.47243	4.05317	5.05289e-05	0.000375287		AT1G01550	Protein of unknown function (DUF793)
Medtr8g088860	1.90281	0.250884	7.58443	3.33963e-14	1.85395e-12	PF00190(Cupin)	AT2G28680	RmlC-like cupins superfamily protein
Medtr4g102660	1.9015	0.676454	2.81098	0.00493904	0.0192985	PF00847(AP2 domain)	AT5G51990	C-repeat-binding factor 4
Medtr8g445800	1.89977	0.18043	10.5291	6.3429e-26	2.1813e-23	PF11721(Di-glucose binding within endoplasmic reticulum), PF07714(Protein tyrosine kinase), PF00560(Leucine Rich Repeat)	AT1G56130	Leucine-rich repeat transmembrane protein kinase
Medtr5g094990	1.89342	0.618274	3.06242	0.00219552	0.00978957
Medtr5g077510	1.893	0.380586	4.9739	6.56199e-07	7.95976e-06	PF04564(U-box domain)	AT1G66160	CYS, MET, PRO, and GLY protein 1
Medtr4g077960	1.89094	0.536752	3.52292	0.000426815	0.00239704	PF00201(UDP-glucoronosyl and UDP-glucosyl transferase)	AT2G22590	UDP-Glycosyltransferase superfamily protein
Medtr1g071150	1.88717	0.700204	2.69517	0.00703537	0.02576	PF00036(EF hand)	AT3G22930	calmodulin-like 11
Medtr7g076600	1.88134	0.263978	7.12687	1.02679e-12	4.13212e-11
Medtr3g089090	1.87602	0.322684	5.81378	6.10759e-09	1.16436e-07	PF00036(EF hand)	AT1G76650	calmodulin-like 38
Medtr2g438630	1.87284	0.772664	2.42387	0.015356	0.049211
Medtr4g117040	1.87191	0.405221	4.61948	3.84703e-06	3.87926e-05	PF00704(Glycosyl hydrolases family 18), PF00069(Protein kinase domain)	AT3G16030	lectin protein kinase family protein
Medtr1g081610	1.8687	0.227419	8.21702	2.08618e-16	1.705e-14	PF00291(Pyridoxal-phosphate dependent enzyme)	AT4G14880	O-acetylserine (thiol) lyase (OAS-TL) isoform A1
MT4Noble_049083	1.86173	0.626934	2.96958	0.00298212	0.0126549
Medtr3g450310	1.85953	0.49665	3.74415	0.000181004	0.00113767	PF00249(Myb-like DNA-binding domain)	AT2G02060	Homeodomain-like superfamily protein
Medtr1g103290	1.85359	0.206193	8.9896	2.48125e-19	3.26981e-17	PF02574(Homocysteine S-methyltransferase)	AT3G22740	homocysteine S-methyltransferase 3
Medtr4g064570	1.84933	0.355367	5.20399	1.95054e-07	2.66788e-06	PF06547(Protein of unknown function (DUF1117)), PF00097(Zinc finger, C3HC4 type (RING finger))	AT3G46620	zinc finger (C3HC4-type RING finger) family protein
Medtr3g087330	1.84654	0.607185	3.04115	0.00235673	0.0103864		AT5G10210
Medtr7g011390	1.84557	0.563843	3.2732	0.00106338	0.00524362
Medtr1g026380	1.8439	0.24574	7.50345	6.21605e-14	3.30524e-12	PF02897(Prolyl oligopeptidase, N-terminal beta-propeller domain), PF00326(Prolyl oligopeptidase family)	AT1G76140	Prolyl oligopeptidase family protein
Medtr0008s0390	1.84359	0.692406	2.66259	0.00775429	0.0279365	PF00249(Myb-like DNA-binding domain)	AT2G31180	myb domain protein 14
Medtr3g085460	1.83827	0.405216	4.53652	5.71907e-06	5.50895e-05	PF04727(ELMO/CED-12 family)	AT1G67400	ELMO/CED-12 family protein
Medtr2g018175	1.83787	0.4805	3.82491	0.00013082	0.000861507	PF04520(Senescence regulator)	AT1G29640	Protein of unknown function, DUF584
Medtr3g032520	1.83675	0.563083	3.26195	0.00110647	0.0054278		AT1G06010
Medtr3g069310	1.83638	0.339608	5.40736	6.39595e-08	9.70015e-07
Medtr7g063260	1.8308	0.258687	7.07726	1.4703e-12	5.76413e-11	PF00106(short chain dehydrogenase)	AT5G06060	NAD(P)-binding Rossmann-fold superfamily protein
Medtr8g028475	1.82911	0.435973	4.19546	2.72315e-05	0.000218205	PF03168(Late embryogenesis abundant protein)	AT2G46150	Late embryogenesis abundant (LEA) hydroxyproline-rich glycoprotein family
Medtr1g102570	1.82878	0.329083	5.5572	2.74134e-08	4.54437e-07	PF00504(Chlorophyll A-B binding protein)	AT3G22840	Chlorophyll A-B binding family protein
Medtr5g023980	1.82874	0.497156	3.6784	0.000234703	0.00142872	PF00069(Protein kinase domain)	AT4G35600	Protein kinase superfamily protein
Medtr4g081870	1.82658	0.208911	8.74337	2.26265e-18	2.56047e-16	PF02365(No apical meristem (NAM) protein)	AT1G69490	NAC-like, activated by AP3/PI
Medtr3g045020	1.82298	0.489216	3.72634	0.000194282	0.0012115	PF08263(Leucine rich repeat N-terminal domain), PF00560(Leucine Rich Repeat)	AT3G05360	receptor like protein 30
Medtr6g042310	1.82098	0.397922	4.57621	4.73465e-06	4.67115e-05	PF00201(UDP-glucoronosyl and UDP-glucosyl transferase)	AT2G22590	UDP-Glycosyltransferase superfamily protein
Medtr4g116610	1.81861	0.356201	5.10559	3.29767e-07	4.28781e-06		AT2G46490
Medtr3g088845	1.81626	0.419737	4.32715	1.51053e-05	0.000129866	PF00676(Dehydrogenase E1 component)	AT1G21400	Thiamin diphosphate-binding fold (THDP-binding) superfamily protein
Medtr4g053250	1.81474	0.614174	2.95477	0.003129	0.013181	PF00170(bZIP transcription factor)	AT1G08320	bZIP transcription factor family protein
Medtr1g061870	1.81273	0.595239	3.04538	0.00232388	0.0102595	PF00076(RNA recognition motif. (a.k.a. RRM, RBD, or RNP domain))	AT2G36660	poly(A) binding protein 7
Medtr4g070640	1.81077	0.404201	4.47987	7.46897e-06	6.9911e-05		AT5G66440
Medtr6g015965	1.80956	0.185583	9.75065	1.83289e-22	3.98044e-20		AT5G15802
Medtr1g090680	1.80875	0.496836	3.64054	0.000272072	0.00162703	PF00931(NB-ARC domain)	AT1G53350	Disease resistance protein (CC-NBS-LRR class) family
Medtr3g016355	1.80773	0.745191	2.42587	0.0152719	0.0489944
Medtr2g008110	1.80448	0.591535	3.0505	0.00228461	0.0101198	PF01988(VIT family)	AT3G43660	Vacuolar iron transporter (VIT) family protein
Medtr5g092040	1.79918	0.66449	2.70761	0.00677701	0.0249868	PF01535(PPR repeat)	AT3G48250	Pentatricopeptide repeat (PPR) superfamily protein
Medtr1g088430	1.7896	0.187653	9.53678	1.47332e-21	2.78668e-19	PF01699(Sodium/calcium exchanger protein)	AT2G47600	magnesium/proton exchanger
Medtr7g093870	1.7888	0.284662	6.28396	3.30056e-10	8.12257e-09	PF03018(Dirigent-like protein)	AT4G38700	Disease resistance-responsive (dirigent-like protein) family protein
Medtr7g092430	1.78845	0.640886	2.79058	0.00526131	0.0203535	PF00560(Leucine Rich Repeat), PF08263(Leucine rich repeat N-terminal domain), PF00069(Protein kinase domain)	AT5G06940	Leucine-rich repeat receptor-like protein kinase family protein
Medtr2g087350	1.78776	0.544146	3.28544	0.00101822	0.00505198	PF04564(U-box domain)	AT2G35930	plant U-box 23
Medtr2g086920	1.78746	0.468321	3.81673	0.000135231	0.000884831	PF00646(F-box domain)	AT2G27310	F-box family protein
Medtr4g068990	1.78578	0.343877	5.19309	2.06835e-07	2.81304e-06	PF00271(Helicase conserved C-terminal domain), PF00270(DEAD/DEAH box helicase)	AT5G54910	DEA(D/H)-box RNA helicase family protein
Medtr7g075580	1.78286	0.187172	9.52525	1.64637e-21	3.07014e-19	PF00067(Cytochrome P450)	AT2G45550	cytochrome P450, family 76, subfamily C, polypeptide 4
Medtr4g050130	1.78151	0.371104	4.80057	1.58211e-06	1.76471e-05		AT3G11690
Medtr1g027160	1.78048	0.666721	2.6705	0.00757382	0.0273982	PF00069(Protein kinase domain)	AT1G66980	suppressor of npr1-1 constitutive 4
Medtr3g434890	1.77854	0.590979	3.00949	0.00261687	0.0113412	PF00403(Heavy-metal-associated domain)	AT1G01490	Heavy metal transport/detoxification superfamily protein
Medtr4g114320	1.77439	0.159516	11.1236	9.63209e-29	5.93157e-26	PF00153(Mitochondrial carrier protein)	AT4G32400	Mitochondrial substrate carrier family protein
Medtr0119s0010	1.77318	0.418236	4.23966	2.23857e-05	0.000183011	PF01988(VIT family)	AT3G43660	Vacuolar iron transporter (VIT) family protein
Medtr3g019120	1.76897	0.490136	3.60914	0.00030721	0.00180535	PF07714(Protein tyrosine kinase), PF03358(NADPH-dependent FMN reductase)	AT2G43230	Protein kinase superfamily protein
Medtr1g031060	1.7657	0.647198	2.72822	0.00636762	0.0237342	PF02485(Core-2/I-Branching enzyme)	AT3G52060	Core-2/I-branching beta-1,6-N-acetylglucosaminyltransferase family protein
Medtr8g012090	1.75678	0.599974	2.92809	0.00341055	0.014131		AT3G06240	F-box family protein
Medtr2g090035	1.75676	0.635854	2.76283	0.00573021	0.021778	PF09685(Domain of unknown function (DUF4870) )	AT4G03320	translocon at the inner envelope membrane of chloroplasts 20-IV
Medtr1g064170	1.754	0.449467	3.90239	9.52458e-05	0.000653735	PF01535(PPR repeat)	AT1G62720	Pentatricopeptide repeat (PPR-like) superfamily protein
Medtr0119s0020	1.75199	0.43724	4.00693	6.15128e-05	0.0004448	PF01988(VIT family)	AT3G43660	Vacuolar iron transporter (VIT) family protein
Medtr4g078555	1.74737	0.567839	3.07722	0.00208941	0.00939028	PF08311(Mad3/BUB1 homology region 1), PF00069(Protein kinase domain)	AT2G20635	ATP binding;protein kinases;protein serine/threonine kinases
Medtr5g061510	1.74733	0.532227	3.28305	0.00102691	0.00508937	PF00560(Leucine Rich Repeat)	AT4G20270	Leucine-rich receptor-like protein kinase family protein
Medtr1g108640	1.74459	0.438127	3.98194	6.83561e-05	0.000487233		AT3G03280
Medtr4g094732	1.73254	0.523648	3.3086	0.000937634	0.00471756		AT4G20040	Pectin lyase-like superfamily protein
Medtr8g097390	1.73172	0.34741	4.98466	6.20697e-07	7.58323e-06	PF04525(LURP-one-related)	AT1G63410	Protein of unknown function (DUF567)
Medtr1g116890	1.73006	0.494498	3.49862	0.000467669	0.00259294	PF00067(Cytochrome P450)	AT3G52970	cytochrome P450, family 76, subfamily G, polypeptide 1
Medtr2g088590	1.72921	0.319049	5.4199	5.96338e-08	9.12248e-07		AT3G21710
Medtr5g072960	1.72815	0.378687	4.56352	5.03041e-06	4.93353e-05		AT1G13080	cytochrome P450, family 71, subfamily B, polypeptide 2
Medtr4g050140	1.72441	0.390831	4.41216	1.02343e-05	9.18657e-05	PF07859(alpha/beta hydrolase fold)	AT5G06570	alpha/beta-Hydrolases superfamily protein
Medtr4g066130	1.7229	0.427419	4.03094	5.55552e-05	0.000407733	PF01946(Thi4 family), PF00501(AMP-binding enzyme), PF00550(Phosphopantetheine attachment site)	AT1G20480	AMP-dependent synthetase and ligase family protein
Medtr1g014180	1.72205	0.630787	2.73	0.00633334	0.0236373	PF04525(LURP-one-related)	AT5G01750	Protein of unknown function (DUF567)
Medtr8g094290	1.72168	0.510498	3.37255	0.000744758	0.00387146	PF01490(Transmembrane amino acid transporter protein)	AT5G09220	amino acid permease 2
Medtr7g009670	1.72153	0.36166	4.76007	1.93529e-06	2.10631e-05	PF01081(KDPG and KHG aldolase)
Medtr6g018370	1.71264	0.554687	3.08757	0.00201799	0.00910347		AT2G17030	F-box family protein with a domain of unknown function (DUF295)
Medtr3g014240	1.71054	0.347233	4.92622	8.38368e-07	9.95068e-06	PF00085(Thioredoxin)	AT3G06730	Thioredoxin z
Medtr4g055580	1.70886	0.475499	3.59383	0.000325858	0.00189809	PF08387(FBD), PF00646(F-box domain)	AT3G59160	F-box/RNI-like superfamily protein
Medtr3g464580	1.7042	0.506118	3.36719	0.000759389	0.00393706	PF00733(Asparagine synthase)	AT3G47340	glutamine-dependent asparagine synthase 1
Medtr2g063813	1.6989	0.478154	3.55304	0.000380808	0.00217276		AT1G79350	RING/FYVE/PHD zinc finger superfamily protein
Medtr1g106730	1.69533	0.364741	4.64803	3.35126e-06	3.42763e-05		AT1G27730	salt tolerance zinc finger
Medtr6g022020	1.69204	0.473965	3.56998	0.000357013	0.00205426	PF00240(Ubiquitin family)	AT5G14360	Ubiquitin-like superfamily protein
Medtr1g043775	1.68726	0.334142	5.04952	4.42917e-07	5.58763e-06	PF03171(2OG-Fe(II) oxygenase superfamily)	AT5G59540	2-oxoglutarate (2OG) and Fe(II)-dependent oxygenase superfamily protein
Medtr2g461710	1.68559	0.608469	2.77021	0.00560205	0.0213781	PF00319(SRF-type transcription factor (DNA-binding and dimerisation domain))	AT5G60910	AGAMOUS-like 8
Medtr3g093360	1.68332	0.645879	2.60625	0.0091539	0.0321223
Medtr6g471240	1.68286	0.294346	5.7173	1.08231e-08	1.96433e-07	PF00560(Leucine Rich Repeat), PF08263(Leucine rich repeat N-terminal domain)	AT3G11010	receptor like protein 34
Medtr6g036920	1.68121	0.69199	2.42952	0.0151187	0.0485913	PF05633(Protein of unknown function (DUF793))	AT1G18740	Protein of unknown function (DUF793)
Medtr4g082810	1.67691	0.253781	6.60769	3.90351e-11	1.14722e-09	PF00201(UDP-glucoronosyl and UDP-glucosyl transferase)	AT3G16520	UDP-glucosyl transferase 88A1
Medtr3g015420	1.67543	0.601239	2.78663	0.00532586	0.0205611
Medtr7g096870	1.6742	0.467807	3.57884	0.000345127	0.00199323	PF00083(Sugar (and other) transporter)	AT2G38940	phosphate transporter 1;4
Medtr4g118350	1.66643	0.184693	9.02271	1.83498e-19	2.53074e-17	PF00391(PEP-utilising enzyme, mobile domain), PF01326(Pyruvate phosphate dikinase, PEP/pyruvate binding domain)	AT4G15530	pyruvate orthophosphate dikinase
Medtr1g029500	1.66272	0.222318	7.47903	7.48722e-14	3.94953e-12		AT1G21410	F-box/RNI-like superfamily protein
Medtr7g017530	1.66203	0.325003	5.11391	3.15565e-07	4.12762e-06	PF01535(PPR repeat)	AT2G31400	genomes uncoupled 1
Medtr4g105220	1.66049	0.264513	6.27753	3.43989e-10	8.4185e-09	PF04864(Allinase)	AT4G24670	tryptophan aminotransferase related 2
Medtr5g034230	1.65517	0.294279	5.62448	1.86071e-08	3.1953e-07	PF07816(Protein of unknown function (DUF1645))	AT1G70420	Protein of unknown function (DUF1645)
Medtr4g133250	1.65487	0.628764	2.63194	0.00848997	0.0301077
Medtr8g015220	1.65304	0.532244	3.1058	0.00189767	0.00862664	PF05153(Myo-inositol oxygenase)	AT1G14520	myo-inositol oxygenase 1
Medtr5g095420	1.65018	0.337281	4.89259	9.95192e-07	1.16245e-05	PF00560(Leucine Rich Repeat), PF08263(Leucine rich repeat N-terminal domain)	AT3G05660	receptor like protein 33
Medtr8g067280	1.64914	0.652049	2.52916	0.0114335	0.0384407	PF00010(Helix-loop-helix DNA-binding domain)	AT1G32640	Basic helix-loop-helix (bHLH) DNA-binding family protein
Medtr5g095120	1.64707	0.489106	3.36751	0.000758506	0.00393365	PF00560(Leucine Rich Repeat), PF08263(Leucine rich repeat N-terminal domain)	AT1G45616	receptor like protein 6
Medtr8g032890	1.64683	0.390867	4.21326	2.51709e-05	0.000202899	PF01476(LysM domain)	AT3G52790	peptidoglycan-binding LysM domain-containing protein
Medtr5g062370	1.64148	0.205377	7.99253	1.32202e-15	9.56479e-14	PF01915(Glycosyl hydrolase family 3 C-terminal domain), PF00933(Glycosyl hydrolase family 3 N terminal domain)	AT1G78060	Glycosyl hydrolase family protein
Medtr8g036830	1.63963	0.206555	7.93797	2.05523e-15	1.43595e-13
Medtr1g063330	1.63899	0.363291	4.51152	6.43653e-06	6.1199e-05	PF02519(Auxin responsive protein)	AT3G09870	SAUR-like auxin-responsive protein family
Medtr6g080680	1.63816	0.348306	4.70322	2.56095e-06	2.69423e-05	PF07734(F-box associated)	AT3G06240	F-box family protein
Medtr5g430430	1.63815	0.149065	10.9896	4.29042e-28	2.27221e-25
Medtr3g086890	1.63763	0.365414	4.48156	7.40987e-06	6.94315e-05		AT4G40020	Myosin heavy chain-related protein
Medtr1g060890	1.63715	0.278923	5.86954	4.37e-09	8.53375e-08		AT5G03670
MT4Noble_002654	1.63653	0.446815	3.66266	0.000249609	0.0015094
Medtr3g056620	1.63177	0.403811	4.04091	5.32435e-05	0.000392398	PF00931(NB-ARC domain)	AT3G07040	NB-ARC domain-containing disease resistance protein
Medtr3g434960	1.63067	0.59657	2.73341	0.0062682	0.0234546	PF00403(Heavy-metal-associated domain)	AT1G01490	Heavy metal transport/detoxification superfamily protein
Medtr3g479620	1.6278	0.156951	10.3714	3.34669e-25	1.055e-22		AT1G22370	UDP-glucosyl transferase 85A5
Medtr4g086740	1.62618	0.599254	2.71368	0.00665407	0.0246502	PF02298(Plastocyanin-like domain)	AT2G15780	Cupredoxin superfamily protein
Medtr3g105730	1.6253	0.334778	4.85486	1.2047e-06	1.38037e-05	PF00481(Protein phosphatase 2C)	AT4G31750	HOPW1-1-interacting 2
Medtr5g086810	1.62102	0.325813	4.97529	6.51503e-07	7.90642e-06	PF00560(Leucine Rich Repeat), PF08263(Leucine rich repeat N-terminal domain)	AT1G47890	receptor like protein 7
Medtr2g055920	1.61985	0.659316	2.45687	0.0140155	0.0456157		AT5G43970	translocase of outer membrane 22-V
Medtr5g030290	1.61334	0.146633	11.0026	3.71312e-28	2.0066e-25
Medtr4g118590	1.61303	0.63413	2.54369	0.0109689	0.0371714	PF01156(Inosine-uridine preferring nucleoside hydrolase)	AT5G18860	inosine-uridine preferring nucleoside hydrolase family protein
Medtr3g092260	1.61291	0.526872	3.0613	0.00220376	0.00981944	PF05030(SSXT protein (N-terminal region))	AT4G00850	GRF1-interacting factor 3
Medtr8g105190	1.60921	0.412164	3.90429	9.45032e-05	0.000649311		AT1G67920
Medtr4g015050	1.60917	0.393874	4.08549	4.39838e-05	0.000332769	PF00931(NB-ARC domain)	AT5G36930	Disease resistance protein (TIR-NBS-LRR class) family
Medtr4g087120	1.60385	0.39576	4.05258	5.06567e-05	0.000375634	PF03171(2OG-Fe(II) oxygenase superfamily)	AT3G19000	2-oxoglutarate (2OG) and Fe(II)-dependent oxygenase superfamily protein
Medtr4g093070	1.60358	0.543668	2.94955	0.00318237	0.0133731	PF00069(Protein kinase domain), PF00139(Legume lectin domain)	AT5G10530	Concanavalin A-like lectin protein kinase family protein
Medtr7g092750	1.6021	0.266778	6.00535	1.90914e-09	4.04432e-08	PF00170(bZIP transcription factor)	AT5G06839	bZIP transcription factor family protein
Medtr1g111150	1.60012	0.261077	6.12893	8.84735e-10	1.99113e-08		AT1G68585
Medtr7g069970	1.5943	0.625081	2.55055	0.0107553	0.0365738
MT4Noble_026425	1.58938	0.575316	2.76262	0.00573388	0.0217838
Medtr1g103690	1.58909	0.226973	7.0012	2.53771e-12	9.5182e-11	PF00291(Pyridoxal-phosphate dependent enzyme)	AT4G14880	O-acetylserine (thiol) lyase (OAS-TL) isoform A1
Medtr6g021870	1.58864	0.416032	3.81855	0.000134238	0.000879201
Medtr5g020860	1.58722	0.303932	5.22229	1.76723e-07	2.44112e-06		AT3G50900
Medtr7g110370	1.58583	0.190645	8.31822	8.92948e-17	7.72721e-15		AT4G12560	F-box and associated interaction domains-containing protein
Medtr3g467370	1.58434	0.420695	3.766	0.000165881	0.00105336	PF00398(Ribosomal RNA adenine dimethylase)	AT2G47420	Ribosomal RNA adenine dimethylase family protein
Medtr6g016260	1.58357	0.608642	2.60181	0.00927332	0.0324725	PF00069(Protein kinase domain)	AT5G58350	with no lysine (K) kinase 4
Medtr2g102730	1.57859	0.309469	5.10097	3.37915e-07	4.37341e-06	PF03000(NPH3 family)	AT3G15570	Phototropic-responsive NPH3 family protein
Medtr1g026160	1.57323	0.605763	2.5971	0.00940144	0.0328387	PF01842(ACT domain), PF00069(Protein kinase domain)	AT4G38470	ACT-like protein tyrosine kinase family protein
Medtr6g088375	1.57113	0.305403	5.14444	2.68318e-07	3.55609e-06	PF00083(Sugar (and other) transporter)	AT1G77210	sugar transporter 14
Medtr7g073250	1.57103	0.149782	10.4887	9.73222e-26	3.26214e-23	PF01132(Elongation factor P (EF-P) OB domain), PF09285(Elongation factor P, C-terminal), PF08207(Elongation factor P (EF-P) KOW-like domain)	AT3G08740	elongation factor P (EF-P) family protein
Medtr6g079440	1.56848	0.427866	3.66583	0.00024654	0.00149254	PF01535(PPR repeat)	AT1G62670	rna processing factor 2
Medtr5g037700	1.56778	0.315911	4.96273	6.95091e-07	8.36924e-06	PF01582(TIR domain)	AT2G20142	Toll-Interleukin-Resistance (TIR) domain family protein
Medtr5g011820	1.56567	0.392181	3.99221	6.54606e-05	0.000468359	PF07279(Protein of unknown function (DUF1442))	AT2G45360	Protein of unknown function (DUF1442)
Medtr8g099765	1.56509	0.401301	3.90005	9.61739e-05	0.000659421
Medtr8g062270	1.56499	0.427593	3.66001	0.000252208	0.00152302	PF07723(Leucine Rich Repeat), PF00646(F-box domain), PF08387(FBD)	AT5G53840	F-box/RNI-like/FBD-like domains-containing protein
Medtr4g104870	1.56445	0.217622	7.18884	6.53439e-13	2.74652e-11		AT4G24700
Medtr3g498715	1.56339	0.34453	4.53775	5.68588e-06	5.48296e-05	PF00999(Sodium/hydrogen exchanger family)	AT3G44900	cation/H+ exchanger 4
Medtr4g104610	1.56207	0.229468	6.80734	9.94194e-12	3.30732e-10	PF00067(Cytochrome P450)	AT3G48270	cytochrome P450, family 71, subfamily A, polypeptide 26
Medtr5g072930	1.55972	0.197831	7.88412	3.16772e-15	2.13438e-13	PF00067(Cytochrome P450)	AT4G31500	cytochrome P450, family 83, subfamily B, polypeptide 1
Medtr5g082150	1.55438	0.381184	4.07777	4.54695e-05	0.000342736	PF07014(Hs1pro-1 protein C-terminus), PF07231(Hs1pro-1 N-terminus)	AT2G40000	ortholog of sugar beet HS1 PRO-1 2
Medtr7g099260	1.55357	0.346987	4.47731	7.55884e-06	7.05608e-05		AT4G17940	Tetratricopeptide repeat (TPR)-like superfamily protein
Medtr4g124910	1.5529	0.174146	8.9172	4.7823e-19	6.14734e-17	PF00166(Chaperonin 10 Kd subunit)	AT5G20720	chaperonin 20
Medtr3g078160	1.55219	0.150358	10.3233	5.52854e-25	1.68271e-22	PF04564(U-box domain)	AT1G10560	plant U-box 18
Medtr6g021830	1.55212	0.473403	3.27863	0.00104312	0.00515813
Medtr3g464650	1.54833	0.640202	2.4185	0.0155848	0.0498052	PF00481(Protein phosphatase 2C)	AT2G30020	Protein phosphatase 2C family protein
Medtr6g079540	1.54753	0.275016	5.62705	1.83315e-08	3.15412e-07	PF07714(Protein tyrosine kinase)	AT1G18160	Protein kinase superfamily protein
Medtr3g094210	1.54537	0.413098	3.74093	0.000183341	0.00115044	PF04928(Poly(A) polymerase central domain), PF01909(Nucleotidyltransferase domain)	AT3G56320	PAP/OAS1 substrate-binding domain superfamily
Medtr8g096130	1.54397	0.371283	4.15848	3.20372e-05	0.000252258	PF00923(Transaldolase)	AT5G13420	Aldolase-type TIM barrel family protein
Medtr7g068380	1.54227	0.173737	8.87702	6.86762e-19	8.53777e-17	PF01699(Sodium/calcium exchanger protein)	AT3G51860	cation exchanger 3
Medtr2g080280	1.54094	0.530246	2.90608	0.00365992	0.0149837
Medtr3g479610	1.53578	0.115451	13.3024	2.2425e-40	3.71134e-37	PF00201(UDP-glucoronosyl and UDP-glucosyl transferase)	AT1G22380	UDP-glucosyl transferase 85A3
Medtr2g096230	1.53504	0.460394	3.33418	0.000855508	0.00436154	PF03081(Exo70 exocyst complex subunit)	AT5G59730	exocyst subunit exo70 family protein H7
Medtr5g086945	1.53503	0.574899	2.67008	0.00758336	0.0274189	PF00560(Leucine Rich Repeat)	AT2G33060	receptor like protein 27
Medtr5g035690	1.53096	0.438742	3.48944	0.000484035	0.00266804	PF06880(Protein of unknown function (DUF1262))	AT1G13480	Protein of unknown function (DUF1262)
Medtr3g012050	1.52748	0.516334	2.95832	0.0030932	0.0130593	PF00931(NB-ARC domain)	AT3G07040	NB-ARC domain-containing disease resistance protein
Medtr7g023690	1.52563	0.17527	8.70447	3.19069e-18	3.50578e-16	PF08263(Leucine rich repeat N-terminal domain), PF00560(Leucine Rich Repeat)	AT5G06860	polygalacturonase inhibiting protein 1
Medtr8g027200	1.52259	0.402527	3.78258	0.000155214	0.000994693	PF00004(ATPase family associated with various cellular activities (AAA))	AT2G46620	P-loop containing nucleoside triphosphate hydrolases superfamily protein
Medtr3g104920	1.51608	0.376772	4.02387	5.72501e-05	0.000417687	PF00924(Mechanosensitive ion channel)	AT5G12080	mechanosensitive channel of small conductance-like 10
Medtr2g021150	1.51545	0.171585	8.83204	1.0278e-18	1.24845e-16	PF00646(F-box domain)	AT3G23880	F-box and associated interaction domains-containing protein
Medtr7g112620	1.51499	0.562193	2.69479	0.00704332	0.0257856	PF00561(alpha/beta hydrolase fold)	AT3G05600	alpha/beta-Hydrolases superfamily protein
Medtr5g033320	1.51492	0.52871	2.86531	0.00416607	0.0167249	PF00664(ABC transporter transmembrane region), PF00005(ABC transporter)	AT3G13080	multidrug resistance-associated protein 3
Medtr1g080800	1.50792	0.413647	3.64542	0.000266959	0.00160079	PF00967(Barwin family)	AT3G04720	pathogenesis-related 4
Medtr1g063850	1.50028	0.152527	9.83612	7.86909e-23	1.81194e-20	PF04545(Sigma-70, region 4), PF04542(Sigma-70 region 2 ), PF04539(Sigma-70 region 3)	AT2G36990	RNApolymerase sigma-subunit F
Medtr5g010030	1.49934	0.154645	9.69541	3.15378e-22	6.57575e-20	PF00069(Protein kinase domain)	AT4G01370	MAP kinase 4
Medtr2g007690	1.49904	0.171473	8.74216	2.28704e-18	2.57705e-16	PF03470(XS zinc finger domain), PF03468(XS domain)	AT5G23570	XS domain-containing protein / XS zinc finger domain-containing protein-related
Medtr2g097620	1.49877	0.404377	3.70637	0.000210255	0.00129961	PF00097(Zinc finger, C3HC4 type (RING finger)), PF06547(Protein of unknown function (DUF1117))	AT3G46620	zinc finger (C3HC4-type RING finger) family protein
Medtr5g011800	1.49718	0.268974	5.56626	2.60262e-08	4.33442e-07	PF07279(Protein of unknown function (DUF1442))	AT2G45360	Protein of unknown function (DUF1442)
Medtr2g461760	1.49524	0.388526	3.8485	0.000118842	0.000793678	PF01486(K-box region)	AT5G60910	AGAMOUS-like 8
Medtr2g097800	1.49477	0.240586	6.21304	5.197e-10	1.22e-08		AT5G59050
Medtr1g021070	1.49242	0.430017	3.47062	0.000519265	0.00283684	PF07816(Protein of unknown function (DUF1645))	AT2G15760	Protein of unknown function (DUF1645)
Medtr8g028600	1.49174	0.303995	4.90713	9.24179e-07	1.08862e-05	PF00155(Aminotransferase class I and II)	AT3G61510	ACC synthase 1
Medtr5g045920	1.48882	0.498139	2.98876	0.00280108	0.012002	PF03031(NLI interacting factor-like phosphatase)	AT5G11860	SCP1-like small phosphatase 5
Medtr8g469630	1.48834	0.564894	2.63473	0.00842039	0.0299171	PF00962(Adenosine/AMP deaminase)	AT2G38280	AMP deaminase, putative / myoadenylate deaminase, putative
Medtr1g083950	1.48439	0.161145	9.21155	3.21449e-20	4.89193e-18	PF00582(Universal stress protein family)	AT3G62550	Adenine nucleotide alpha hydrolases-like superfamily protein
Medtr4g090525	1.48232	0.246278	6.0189	1.75601e-09	3.73788e-08	PF00459(Inositol monophosphatase family)	AT5G54390	HAL2-like
Medtr4g094488	1.47895	0.512332	2.88671	0.0038929	0.0158007	PF08031(Berberine and berberine like ), PF01565(FAD binding domain )	AT5G44440	FAD-binding Berberine family protein
Medtr2g030100	1.47655	0.304559	4.84815	1.24621e-06	1.42547e-05	PF05938(Plant self-incompatibility protein S1)	AT3G24060	Plant self-incompatibility protein S1 family
Medtr5g015840	1.47531	0.366349	4.02705	5.64802e-05	0.000413034	PF10343(Potential Queuosine, Q, salvage protein family)
Medtr1g100335	1.47491	0.415783	3.54732	0.000389176	0.00220956	PF00106(short chain dehydrogenase)	AT4G23420	NAD(P)-binding Rossmann-fold superfamily protein
Medtr4g073560	1.47365	0.415364	3.54786	0.000388379	0.00220645		AT3G21620	ERD (early-responsive to dehydration stress) family protein
Medtr4g015600	1.47355	0.344712	4.27473	1.91368e-05	0.000159403		AT3G47160	RING/U-box superfamily protein
Medtr8g464690	1.46902	0.193268	7.60094	2.93977e-14	1.65981e-12	PF01221(Dynein light chain type 1 )	AT4G27360	Dynein light chain type 1 family protein
Medtr5g058595	1.46884	0.592878	2.47747	0.0132318	0.0434659
Medtr8g005010	1.46828	0.408941	3.59044	0.000330125	0.00192041	PF00149(Calcineurin-like phosphoesterase)	AT5G59160	type one serine/threonine protein phosphatase 2
Medtr3g088630	1.46826	0.176212	8.33232	7.92746e-17	6.99731e-15	PF00072(Response regulator receiver domain)	AT3G57040	response regulator 9
Medtr3g452760	1.46695	0.230663	6.35971	2.02129e-10	5.2066e-09	PF00560(Leucine Rich Repeat), PF08263(Leucine rich repeat N-terminal domain)	AT4G13920	receptor like protein 50
Medtr8g022300	1.46569	0.235842	6.2147	5.14239e-10	1.20933e-08	PF05564(Dormancy/auxin associated protein)	AT1G54070	Dormancy/auxin associated family protein
Medtr1g114220	1.46166	0.293321	4.98313	6.25637e-07	7.6345e-06	PF01535(PPR repeat)	AT5G08305	Pentatricopeptide repeat (PPR) superfamily protein
Medtr5g004800	1.4597	0.388875	3.75366	0.000174275	0.00109876	PF00168(C2 domain)	AT4G34150	Calcium-dependent lipid-binding (CaLB domain) family protein
Medtr7g051910	1.45955	0.23376	6.24381	4.27047e-10	1.02615e-08	PF03188(Eukaryotic cytochrome b561), PF04526(Protein of unknown function (DUF568))	AT3G25290	Auxin-responsive family protein
Medtr6g038540	1.45626	0.510476	2.85276	0.00433417	0.0172781	PF04117(Mpv17 / PMP22 family )	AT5G43140	Peroxisomal membrane 22 kDa (Mpv17/PMP22) family protein
Medtr2g014730	1.45407	0.430979	3.37388	0.000741173	0.00385585	PF00931(NB-ARC domain)	AT3G14460	LRR and NB-ARC domains-containing disease resistance protein
Medtr5g048470	1.45008	0.167091	8.6784	4.0138e-18	4.37389e-16	PF03171(2OG-Fe(II) oxygenase superfamily)	AT1G17020	senescence-related gene 1
Medtr1g115345	1.44914	0.249683	5.80392	6.47816e-09	1.22442e-07		AT2G37430	C2H2 and C2HC zinc fingers superfamily protein
Medtr0365s0030	1.44892	0.357483	4.05312	5.0539e-05	0.000375287	PF00069(Protein kinase domain), PF00560(Leucine Rich Repeat), PF08263(Leucine rich repeat N-terminal domain)	AT1G35710	Protein kinase family protein with leucine-rich repeat domain
Medtr7g086640	1.44837	0.154961	9.34668	9.04448e-21	1.54515e-18	PF01138(3' exoribonuclease family, domain 1), PF03726(Polyribonucleotide nucleotidyltransferase, RNA binding domain), PF00575(S1 RNA binding domain), PF03725(3' exoribonuclease family, domain 2), PF00013(KH domain)	AT3G03710	polyribonucleotide nucleotidyltransferase, putative
Medtr7g082760	1.44621	0.30213	4.78674	1.69515e-06	1.87735e-05
Medtr3g078613	1.44058	0.244014	5.90369	3.55466e-09	7.10649e-08	PF00072(Response regulator receiver domain)	AT3G48100	response regulator 5
MT4Noble_049810	1.44041	0.594539	2.42274	0.0154039	0.0493403
Medtr8g096220	1.43908	0.410093	3.50915	0.000449542	0.00250081	PF06911(Senescence-associated protein)	AT3G21600	Senescence/dehydration-associated protein-related
Medtr4g013245	1.43853	0.221948	6.48139	9.08828e-11	2.51998e-09	PF06963(Ferroportin1 (FPN1))	AT5G03570	iron regulated 2
Medtr3g022730	1.43797	0.435232	3.30391	0.000953474	0.00478272		AT3G14460	LRR and NB-ARC domains-containing disease resistance protein
Medtr6g071475	1.43775	0.474457	3.03032	0.00244297	0.0107209	PF12146(Serine aminopeptidase, S33)	AT1G73480	alpha/beta-Hydrolases superfamily protein
Medtr1g062710	1.43586	0.428537	3.35061	0.000806332	0.00414033	PF04909(Amidohydrolase)	AT3G53180	glutamate-ammonia ligases;catalytics;glutamate-ammonia ligases
Medtr6g012810	1.43516	0.562771	2.55017	0.010767	0.036609	PF00069(Protein kinase domain), PF00954(S-locus glycoprotein domain), PF08276(PAN-like domain), PF01453(D-mannose binding lectin)	AT1G11300	protein serine/threonine kinases;protein kinases;ATP binding;sugar binding;kinases;carbohydrate binding
Medtr2g044440	1.43135	0.550529	2.59995	0.00932371	0.0326069	PF00097(Zinc finger, C3HC4 type (RING finger)), PF01485(IBR domain, a half RING-finger domain)	AT3G53690	RING/U-box superfamily protein
Medtr1g018420	1.43102	0.375461	3.81137	0.0001382	0.000900922		AT1G27730	salt tolerance zinc finger
Medtr8g099475	1.4308	0.467731	3.05903	0.00222055	0.00988073
Medtr3g450510	1.43053	0.213389	6.70389	2.02944e-11	6.24154e-10	PF00494(Squalene/phytoene synthase)	AT5G17230	PHYTOENE SYNTHASE
Medtr6g087150	1.43031	0.396299	3.60915	0.000307198	0.00180535	PF00097(Zinc finger, C3HC4 type (RING finger))	AT2G20030	RING/U-box superfamily protein
Medtr3g109430	1.42909	0.51338	2.78369	0.0053744	0.0207032		AT2G25735
Medtr0400s0040	1.42904	0.352885	4.04959	5.1307e-05	0.00038003	PF00069(Protein kinase domain), PF00560(Leucine Rich Repeat), PF08263(Leucine rich repeat N-terminal domain)	AT1G35710	Protein kinase family protein with leucine-rich repeat domain
Medtr1g069275	1.42797	0.485481	2.94135	0.00326784	0.0136702	PF00743(Flavin-binding monooxygenase-like)	AT4G28720	Flavin-binding monooxygenase family protein
Medtr5g072980	1.42658	0.193813	7.36061	1.83073e-13	8.79816e-12	PF00067(Cytochrome P450)	AT4G31500	cytochrome P450, family 83, subfamily B, polypeptide 1
Medtr5g035910	1.42647	0.257004	5.55039	2.85029e-08	4.70253e-07	PF00069(Protein kinase domain), PF00139(Legume lectin domain)	AT3G55550	Concanavalin A-like lectin protein kinase family protein
Medtr2g098420	1.42621	0.305419	4.6697	3.01642e-06	3.11601e-05		AT5G12900
Medtr1g028350	1.42616	0.355807	4.00823	6.1175e-05	0.000442842
Medtr4g021260	1.42246	0.316018	4.50122	6.75661e-06	6.40121e-05	PF05003(Protein of unknown function (DUF668)), PF11961(Domain of unknown function (DUF3475))	AT3G23160	Protein of unknown function (DUF668)
Medtr8g091690	1.42138	0.478146	2.9727	0.00295193	0.0125449	PF00067(Cytochrome P450)	AT5G07990	Cytochrome P450 superfamily protein
Medtr4g093840	1.42051	0.138032	10.2911	7.72532e-25	2.2985e-22	PF03171(2OG-Fe(II) oxygenase superfamily)	AT2G36690	2-oxoglutarate (2OG) and Fe(II)-dependent oxygenase superfamily protein
Medtr1g019440	1.42026	0.17339	8.19116	2.58715e-16	2.07599e-14	PF07821(Alpha-amylase C-terminal beta-sheet domain), PF00128(Alpha amylase, catalytic domain)	AT4G25000	alpha-amylase-like
Medtr6g072600	1.4189	0.370936	3.8252	0.000130664	0.000860692	PF01582(TIR domain), PF00931(NB-ARC domain)	AT5G46260	disease resistance protein (TIR-NBS-LRR class) family
Medtr1g027150	1.41727	0.365171	3.88113	0.000103973	0.000704865	PF07714(Protein tyrosine kinase)	AT1G67000	Protein kinase superfamily protein
Medtr4g105020	1.41539	0.363393	3.89493	9.82268e-05	0.000671238	PF00564(PB1 domain)	AT3G48240	Octicosapeptide/Phox/Bem1p family protein
Medtr4g132970	1.41504	0.347769	4.06891	4.72341e-05	0.000354423	PF04720(PDDEXK-like family of unknown function)	AT1G62420	Protein of unknown function (DUF506)
Medtr2g012780	1.41291	0.204079	6.92334	4.41116e-12	1.58276e-10		AT1G11120
Medtr1g070345	1.41288	0.274735	5.1427	2.70818e-07	3.58563e-06	PF00067(Cytochrome P450)	AT5G63450	cytochrome P450, family 94, subfamily B, polypeptide 1
Medtr5g087960	1.41274	0.338712	4.17091	3.03383e-05	0.000240526	PF01575(MaoC like domain)	AT5G60335	Thioesterase superfamily protein
Medtr5g020110	1.40797	0.3952	3.56267	0.000367097	0.0021036
Medtr3g099670	1.40775	0.29796	4.72463	2.30529e-06	2.46344e-05	PF07651(ANTH domain)	AT4G40080	ENTH/ANTH/VHS superfamily protein
Medtr1g082430	1.40757	0.158101	8.90303	5.43447e-19	6.8854e-17		AT5G27390	Mog1/PsbP/DUF1795-like photosystem II reaction center PsbP family protein
Medtr8g032940	1.40745	0.394585	3.56691	0.000361221	0.00207474	PF01476(LysM domain)	AT3G52790	peptidoglycan-binding LysM domain-containing protein
Medtr7g103900	1.40646	0.214653	6.55223	5.66829e-11	1.62266e-09	PF05910(Plant protein of unknown function (DUF868))	AT2G27770	Plant protein of unknown function (DUF868)
Medtr8g076340	1.40388	0.271185	5.17683	2.25683e-07	3.04591e-06	PF00320(GATA zinc finger)	AT5G66320	GATA transcription factor 5
Medtr2g078750	1.40351	0.185769	7.55513	4.18431e-14	2.294e-12		AT5G53900	Serine/threonine-protein kinase WNK (With No Lysine)-related
Medtr3g007630	1.4023	0.407584	3.44051	0.000580625	0.00312023	PF00954(S-locus glycoprotein domain), PF00069(Protein kinase domain), PF11883(Domain of unknown function (DUF3403)), PF01453(D-mannose binding lectin), PF08276(PAN-like domain)	AT4G21380	receptor kinase 3
Medtr6g033985	1.40146	0.53607	2.61431	0.0089407	0.0314576
MT4Noble_050062	1.40131	0.541944	2.58572	0.00971772	0.033699
Medtr7g101250	1.39984	0.235924	5.93344	2.96647e-09	6.03783e-08	PF04520(Senescence regulator)	AT5G03230	Protein of unknown function, DUF584
Medtr1g103870	1.39927	0.262195	5.33676	9.46228e-08	1.38432e-06	PF01063(Amino-transferase class IV)	AT3G54970	D-aminoacid aminotransferase-like PLP-dependent enzymes superfamily protein
Medtr7g106540	1.39912	0.377736	3.70396	0.000212259	0.00130956		AT3G11760
Medtr8g014020	1.39704	0.336095	4.15667	3.22914e-05	0.000253939		AT1G52140
Medtr2g022760	1.39642	0.206652	6.75737	1.4052e-11	4.4616e-10	PF00232(Glycosyl hydrolase family 1)	AT1G61820	beta glucosidase 46
Medtr4g104430	1.39541	0.425477	3.27965	0.00103937	0.00514631	PF09415(CENP-S associating Centromere protein X)	AT1G78790
Medtr8g059425	1.39457	0.217459	6.41302	1.42663e-10	3.75518e-09	PF00201(UDP-glucoronosyl and UDP-glucosyl transferase)	AT1G22400	UDP-Glycosyltransferase superfamily protein
Medtr1g012760	1.39054	0.436338	3.18686	0.00143829	0.00680955	PF03101(FAR1 DNA-binding domain)
Medtr7g105840	1.39001	0.147033	9.45373	3.26961e-21	5.93008e-19		AT2G33180
Medtr4g085900	1.38961	0.109537	12.6863	7.04798e-37	8.71885e-34	PF01965(DJ-1/PfpI family)	AT4G34020	Class I glutamine amidotransferase-like superfamily protein
Medtr7g115180	1.38882	0.251176	5.52927	3.21572e-08	5.2466e-07	PF02416(mttA/Hcf106 family)	AT5G28750	Bacterial sec-independent translocation protein mttA/Hcf106
Medtr6g016325	1.38471	0.359541	3.85134	0.000117473	0.000785921	PF01747(ATP-sulfurylase)	AT1G19920	Pseudouridine synthase/archaeosine transglycosylase-like family protein
Medtr8g056860	1.38407	0.158297	8.74355	2.25905e-18	2.56047e-16	PF00004(ATPase family associated with various cellular activities (AAA)), PF01434(Peptidase family M41)	AT1G79560	FTSH protease 12
Medtr1g107315	1.3839	0.213502	6.48189	9.05787e-11	2.51681e-09	PF00201(UDP-glucoronosyl and UDP-glucosyl transferase)	AT4G15480	UDP-Glycosyltransferase superfamily protein
Medtr1g112050	1.38384	0.304152	4.54984	5.3686e-06	5.21881e-05	PF00111(2Fe-2S iron-sulfur cluster binding domain)	AT2G27510	ferredoxin 3
Medtr4g098900	1.38308	0.1799	7.68805	1.49394e-14	8.95011e-13	PF03151(Triose-phosphate Transporter family)	AT4G18210	purine permease 10
MT4Noble_045446	1.37912	0.499989	2.7583	0.00581029	0.0220109
Medtr1g032290	1.37057	0.490692	2.79314	0.00521983	0.0202285	PF00293(NUDIX domain)	AT2G01670	nudix hydrolase homolog 17
Medtr5g011990	1.3683	0.0942848	14.5124	1.01096e-47	2.67703e-44		AT1G62780
Medtr3g016290	1.36736	0.464689	2.94252	0.00325558	0.013634
Medtr5g091600	1.3671	0.315283	4.3361	1.4503e-05	0.000125462	PF03169(OPT oligopeptide transporter protein)	AT1G65730	YELLOW STRIPE like 7
Medtr3g078210	1.36521	0.502449	2.7171	0.0065856	0.0244342	PF02358(Trehalose-phosphatase), PF00982(Glycosyltransferase family 20)	AT1G23870	trehalose-phosphatase/synthase 9
Medtr7g088850	1.36476	0.295997	4.61072	4.0127e-06	4.02019e-05	PF00004(ATPase family associated with various cellular activities (AAA))	AT2G03670	cell division cycle 48B
Medtr8g028565	1.36384	0.311434	4.37923	1.19102e-05	0.000105373	PF03106(WRKY DNA -binding domain)	AT4G01250	WRKY family transcription factor
Medtr2g039410	1.3638	0.513761	2.65454	0.00794172	0.0284916	PF09265(Cytokinin dehydrogenase 1, FAD and cytokinin binding), PF01565(FAD binding domain )	AT5G56970	cytokinin oxidase 3
Medtr2g076320	1.3634	0.377859	3.60823	0.000308294	0.00181092	PF02536(mTERF)	AT5G07900	Mitochondrial transcription termination factor family protein
Medtr5g094140	1.36307	0.246647	5.52641	3.26844e-08	5.31951e-07		AT5G55340	MBOAT (membrane bound O-acyl transferase) family protein
Medtr7g056647	1.36024	0.207935	6.54167	6.08372e-11	1.73222e-09	PF00954(S-locus glycoprotein domain), PF07714(Protein tyrosine kinase), PF08276(PAN-like domain)	AT1G11330	S-locus lectin protein kinase family protein
Medtr3g067980	1.35489	0.354134	3.82592	0.000130286	0.000858419	PF08137(DVL family)	AT2G39705	ROTUNDIFOLIA like 8
Medtr8g032010	1.35255	0.24257	5.57591	2.46242e-08	4.12428e-07	PF00106(short chain dehydrogenase)	AT3G61220	NAD(P)-binding Rossmann-fold superfamily protein
Medtr1g068630	1.35132	0.229278	5.89381	3.77388e-09	7.49679e-08	PF00892(EamA-like transporter family)	AT2G37460	nodulin MtN21 /EamA-like transporter family protein
Medtr4g127680	1.34906	0.367654	3.66937	0.000243153	0.00147541		AT5G57340
Medtr6g043810	1.34759	0.285989	4.71204	2.45255e-06	2.59359e-05	PF01554(MatE)	AT1G71870	MATE efflux family protein
Medtr2g081580	1.3394	0.45812	2.92368	0.00345917	0.0142922		AT4G27280	Calcium-binding EF-hand family protein
Medtr8g099000	1.33735	0.226743	5.89808	3.67764e-09	7.32209e-08	PF04525(LURP-one-related)	AT5G41590	Protein of unknown function (DUF567)
Medtr5g091930	1.3368	0.281795	4.74387	2.09674e-06	2.25881e-05	PF00285(Citrate synthase)	AT3G58750	citrate synthase 2
Medtr8g432400	1.3358	0.474898	2.81281	0.00491105	0.0191957	PF00168(C2 domain)	AT2G45760	BON association protein 2
Medtr7g050980	1.33567	0.531205	2.51441	0.0119231	0.0398491	PF01095(Pectinesterase), PF04043(Plant invertase/pectin methylesterase inhibitor)	AT1G11580	methylesterase PCR A
Medtr2g088350	1.33524	0.358983	3.71949	0.000199624	0.00124027	PF00271(Helicase conserved C-terminal domain)	AT3G22750	Protein kinase superfamily protein
Medtr6g080440	1.33511	0.286256	4.66403	3.10082e-06	3.19618e-05	PF02798(Glutathione S-transferase, N-terminal domain), PF00043(Glutathione S-transferase, C-terminal domain)	AT2G29420	glutathione S-transferase tau 7
Medtr7g082550	1.33443	0.366284	3.64317	0.000269303	0.00161192	PF01535(PPR repeat)	AT2G37320	Tetratricopeptide repeat (TPR)-like superfamily protein
Medtr8g061030	1.33417	0.184679	7.22431	5.03669e-13	2.17927e-11	PF00929(Exonuclease)	AT3G15140	Polynucleotidyl transferase, ribonuclease H-like superfamily protein
Medtr1g102070	1.33267	0.457124	2.91534	0.00355303	0.014623	PF03171(2OG-Fe(II) oxygenase superfamily)	AT5G51810	gibberellin 20 oxidase 2
Medtr2g080010	1.32988	0.113538	11.713	1.09299e-31	8.51248e-29	PF02365(No apical meristem (NAM) protein)	AT3G15510	NAC domain containing protein 2
Medtr2g086300	1.3294	0.514914	2.58179	0.00982881	0.0340352	PF00561(alpha/beta hydrolase fold)	AT3G44510	alpha/beta-Hydrolases superfamily protein
Medtr3g078380	1.32783	0.445399	2.98122	0.00287105	0.0122543	PF00400(WD domain, G-beta repeat)	AT5G50120	Transducin/WD40 repeat-like superfamily protein
Medtr2g035660	1.32762	0.0897487	14.7926	1.63411e-49	4.8079e-46	PF09273(Rubisco LSMT substrate-binding), PF00856(SET domain)	AT4G20130	plastid transcriptionally active 14
Medtr3g071050	1.32408	0.417329	3.17276	0.00150998	0.00708188		AT3G27230	S-adenosyl-L-methionine-dependent methyltransferases superfamily protein
Medtr4g061930	1.3237	0.252189	5.24884	1.5306e-07	2.13859e-06	PF07714(Protein tyrosine kinase), PF11721(Di-glucose binding within endoplasmic reticulum)	AT3G46290	hercules receptor kinase 1
Medtr6g021915	1.32345	0.496666	2.66467	0.00770628	0.0278061	PF01210(NAD-dependent glycerol-3-phosphate dehydrogenase N-terminus), PF07479(NAD-dependent glycerol-3-phosphate dehydrogenase C-terminus)	AT5G40610	NAD-dependent glycerol-3-phosphate dehydrogenase family protein
Medtr7g074870	1.32155	0.261869	5.0466	4.49731e-07	5.6655e-06	PF01370(NAD dependent epimerase/dehydratase family)	AT2G45400	NAD(P)-binding Rossmann-fold superfamily protein
Medtr7g102380	1.32022	0.284279	4.64412	3.4153e-06	3.4864e-05	PF00314(Thaumatin family)	AT1G20030	Pathogenesis-related thaumatin superfamily protein
Medtr8g061360	1.32011	0.300731	4.38967	1.13521e-05	0.00010084	PF00155(Aminotransferase class I and II)	AT5G53970	Tyrosine transaminase family protein
Medtr3g103590	1.31911	0.177849	7.41704	1.19766e-13	6.00644e-12	PF02183(Homeobox associated leucine zipper), PF00046(Homeobox domain)	AT5G06710	homeobox from Arabidopsis thaliana
Medtr8g088800	1.31893	0.270275	4.87996	1.06109e-06	1.23236e-05	PF03800(Nuf2 family)	AT1G61000
Medtr3g111660	1.31693	0.543965	2.42098	0.0154789	0.0495263	PF01040(UbiA prenyltransferase family)	AT4G23660	polyprenyltransferase 1
Medtr2g018870	1.31682	0.390599	3.37129	0.000748182	0.00388468	PF01535(PPR repeat)	AT4G21065	Tetratricopeptide repeat (TPR)-like superfamily protein
Medtr7g075185	1.31389	0.493381	2.66304	0.00774376	0.0279062		AT1G01930	zinc finger protein-related
Medtr5g091390	1.31371	0.184122	7.13501	9.67785e-13	3.92449e-11	PF03106(WRKY DNA -binding domain)	AT4G18170	WRKY DNA-binding protein 28
Medtr1g116370	1.31314	0.221357	5.93225	2.98819e-09	6.0727e-08	PF04652(Vta1 like), PF02364(1,3-beta-glucan synthase component )	AT5G13000	glucan synthase-like 12
Medtr3g092150	1.31313	0.291901	4.49855	6.8417e-06	6.47261e-05	PF02183(Homeobox associated leucine zipper), PF00046(Homeobox domain)	AT2G46680	homeobox 7
Medtr5g085580	1.31302	0.4443	2.95526	0.00312402	0.0131642	PF07983(X8 domain), PF00332(Glycosyl hydrolases family 17)	AT2G05790	O-Glycosyl hydrolases family 17 protein
Medtr4g046040	1.31222	0.494467	2.6538	0.00795902	0.0285411
Medtr7g068340	1.31005	0.155466	8.42663	3.55749e-17	3.3524e-15	PF00153(Mitochondrial carrier protein)	AT3G51870	Mitochondrial substrate carrier family protein
Medtr2g038380	1.30921	0.506184	2.58644	0.00969739	0.0336461	PF00560(Leucine Rich Repeat)	AT2G19330	plant intracellular ras group-related LRR 6
Medtr5g073020	1.30874	0.416084	3.14536	0.00165882	0.00769138	PF00067(Cytochrome P450)	AT4G31500	cytochrome P450, family 83, subfamily B, polypeptide 1
Medtr6g092940	1.30739	0.305388	4.2811	1.85975e-05	0.000155498	PF02386(Cation transport protein)	AT4G10310	high-affinity K+ transporter 1
Medtr1g079525	1.30693	0.10338	12.642	1.23803e-36	1.42535e-33	PF02037(SAP domain)	AT3G04260	plastid transcriptionally active 3
Medtr8g069675	1.3064	0.451347	2.89445	0.00379827	0.0154712
Medtr4g083440	1.30513	0.141272	9.23842	2.5017e-20	3.96676e-18	PF05742(Transport and Golgi organisation 2)	AT4G38260	Protein of unknown function (DUF833)
Medtr4g116530	1.30315	0.424217	3.0719	0.00212702	0.00952699		AT5G25240
Medtr5g079980	1.30266	0.359684	3.62168	0.000292696	0.00173314	PF00560(Leucine Rich Repeat), PF08263(Leucine rich repeat N-terminal domain)	AT3G11010	receptor like protein 34
Medtr7g063950	1.30202	0.482237	2.69996	0.00693476	0.0254727
Medtr4g061833	1.3	0.250741	5.18464	2.16429e-07	2.93148e-06	PF07714(Protein tyrosine kinase), PF11721(Di-glucose binding within endoplasmic reticulum)	AT3G46290	hercules receptor kinase 1
Medtr3g088760	1.29738	0.334236	3.88162	0.000103761	0.00070379	PF07645(Calcium-binding EGF domain), PF00069(Protein kinase domain)	AT1G21270	wall-associated kinase 2
Medtr4g094562	1.29628	0.19858	6.52772	6.67777e-11	1.88717e-09	PF07712(Stress up-regulated Nod 19)	AT5G61820
Medtr7g118230	1.29608	0.21614	5.99649	2.0163e-09	4.24417e-08	PF00076(RNA recognition motif. (a.k.a. RRM, RBD, or RNP domain))	AT1G01080	RNA-binding (RRM/RBD/RNP motifs) family protein
Medtr6g087260	1.29603	0.436309	2.97045	0.00297365	0.0126291	PF00560(Leucine Rich Repeat), PF01582(TIR domain), PF00931(NB-ARC domain)	AT5G17680	disease resistance protein (TIR-NBS-LRR class), putative
Medtr0126s0080	1.29554	0.26671	4.85747	1.18893e-06	1.36467e-05	PF00170(bZIP transcription factor)	AT5G06839	bZIP transcription factor family protein
Medtr3g114460	1.29433	0.462667	2.79754	0.0051494	0.0200053	PF05055(Protein of unknown function (DUF677))	AT1G20180	Protein of unknown function (DUF677)
MT4Noble_026712	1.29128	0.363735	3.55006	0.000385142	0.00218994
Medtr1g086000	1.29022	0.152613	8.4542	2.81013e-17	2.7059e-15	PF05899(Protein of unknown function (DUF861))	AT2G32180	plastid transcriptionally active 18
Medtr4g089025	1.28912	0.216907	5.94318	2.79548e-09	5.72058e-08	PF00067(Cytochrome P450)	AT3G48270	cytochrome P450, family 71, subfamily A, polypeptide 26
Medtr6g065550	1.28671	0.465141	2.76627	0.00567008	0.0215972		AT2G27280	Coiled-coil domain-containing protein 55 (DUF2040)
Medtr7g108250	1.28552	0.296891	4.32995	1.49142e-05	0.000128432	PF00462(Glutaredoxin)	AT3G62930	Thioredoxin superfamily protein
Medtr1g057290	1.28502	0.257221	4.99579	5.85968e-07	7.18686e-06		AT2G35460	Late embryogenesis abundant (LEA) hydroxyproline-rich glycoprotein family
Medtr8g063150	1.28103	0.134404	9.53118	1.55508e-21	2.92046e-19		AT1G10522
Medtr7g110880	1.277	0.194508	6.56526	5.1942e-11	1.4934e-09		AT2G46940
Medtr6g091960	1.27677	0.270629	4.71779	2.38415e-06	2.53137e-05		AT1G79350	RING/FYVE/PHD zinc finger superfamily protein
Medtr7g451210	1.27672	0.430272	2.96723	0.00300494	0.0127373	PF00403(Heavy-metal-associated domain)	AT1G01490	Heavy metal transport/detoxification superfamily protein
Medtr7g113250	1.27451	0.416167	3.06249	0.00219502	0.00978957		AT1G09040
Medtr4g091200	1.27421	0.257614	4.9462	7.56752e-07	9.07554e-06	PF01565(FAD binding domain ), PF08031(Berberine and berberine like )	AT4G20800	FAD-binding Berberine family protein
Medtr5g015350	1.27147	0.479671	2.65071	0.00803231	0.0287504
Medtr8g066780	1.26948	0.208927	6.07619	1.23073e-09	2.70324e-08	PF00097(Zinc finger, C3HC4 type (RING finger))	AT4G17905	RING/U-box superfamily protein
Medtr8g076320	1.2688	0.303487	4.18073	2.90571e-05	0.000231408
Medtr3g088455	1.26806	0.503045	2.52078	0.0117096	0.0392148	PF01490(Transmembrane amino acid transporter protein)	AT1G77380	amino acid permease 3
Medtr5g464810	1.26784	0.224952	5.63607	1.73976e-08	3.013e-07	PF00201(UDP-glucoronosyl and UDP-glucosyl transferase)	AT1G22360	UDP-glucosyl transferase 85A2
Medtr3g450500	1.26752	0.363264	3.48927	0.000484347	0.00266834	PF02536(mTERF)	AT5G07900	Mitochondrial transcription termination factor family protein
Medtr3g089070	1.26537	0.326762	3.87244	0.000107753	0.000727816	PF00036(EF hand)	AT1G76650	calmodulin-like 38
Medtr5g021390	1.26417	0.210583	6.00317	1.93501e-09	4.08932e-08	PF00067(Cytochrome P450)	AT4G36220	ferulic acid 5-hydroxylase 1
Medtr0009s0370	1.26315	0.146315	8.6331	5.97117e-18	6.35007e-16	PF00083(Sugar (and other) transporter)	AT1G11260	sugar transporter 1
Medtr4g071620	1.26294	0.377712	3.34365	0.000826832	0.00423573	PF01501(Glycosyl transferase family 8)	AT3G28340	galacturonosyltransferase-like 10
Medtr3g056730	1.26218	0.329387	3.83193	0.000127144	0.000840432
Medtr3g108320	1.2616	0.352839	3.57558	0.000349453	0.00201558	PF00520(Ion transport protein), PF00027(Cyclic nucleotide-binding domain)	AT4G32650	potassium channel in Arabidopsis thaliana 3
Medtr3g101930	1.25941	0.259827	4.84711	1.2527e-06	1.43104e-05	PF02458(Transferase family)	AT5G42830	HXXXD-type acyl-transferase family protein
Medtr7g100810	1.25853	0.389383	3.23212	0.00122876	0.00594728	PF01535(PPR repeat)	AT3G53360	Tetratricopeptide repeat (TPR)-like superfamily protein
Medtr1g098460	1.2575	0.458469	2.74281	0.00609151	0.0229221	PF00847(AP2 domain)	AT5G61890	Integrase-type DNA-binding superfamily protein
Medtr1g107155	1.25745	0.512989	2.45123	0.0142368	0.0461773		AT1G30600	Subtilase family protein
Medtr3g051530	1.25678	0.257868	4.87374	1.09507e-06	1.26848e-05		AT3G20340
Medtr7g019160	1.25658	0.185329	6.78027	1.19952e-11	3.8878e-10		AT3G19660
Medtr5g080000	1.25569	0.514225	2.4419	0.0146101	0.0472023	PF00560(Leucine Rich Repeat), PF08263(Leucine rich repeat N-terminal domain)	AT3G11010	receptor like protein 34
Medtr5g037710	1.25319	0.287824	4.35402	1.33662e-05	0.000116583	PF01582(TIR domain)	AT2G20142	Toll-Interleukin-Resistance (TIR) domain family protein
Medtr1g009840	1.25297	0.218431	5.73625	9.67943e-09	1.77133e-07		AT3G15000	cobalt ion binding
Medtr2g070410	1.25283	0.161178	7.77294	7.66859e-15	4.85144e-13	PF01596(O-methyltransferase)	AT3G62000	S-adenosyl-L-methionine-dependent methyltransferases superfamily protein
Medtr5g064240	1.25244	0.225513	5.55374	2.79615e-08	4.62762e-07	PF00201(UDP-glucoronosyl and UDP-glucosyl transferase)	AT1G22360	UDP-glucosyl transferase 85A2
Medtr8g009290	1.25198	0.133964	9.34566	9.13201e-21	1.5501e-18		AT2G44640
Medtr2g080030	1.25181	0.280988	4.45505	8.38734e-06	7.71974e-05		AT3G15518
Medtr7g109280	1.25151	0.31125	4.0209	5.79756e-05	0.000421873		AT1G02700
Medtr3g010320	1.25071	0.407288	3.07083	0.00213462	0.00955295		AT4G33925
Medtr8g036035	1.25045	0.11356	11.0114	3.36753e-28	1.85775e-25	PF00701(Dihydrodipicolinate synthetase family)	AT2G45440	dihydrodipicolinate synthase
Medtr3g117620	1.24984	0.295745	4.22607	2.37804e-05	0.000192806	PF01535(PPR repeat)	AT3G12770	mitochondrial editing factor 22
Medtr5g041530	1.24925	0.378963	3.2965	0.000978989	0.00488204	PF02701(Dof domain, zinc finger)	AT3G47500	cycling DOF factor 3
Medtr4g126350	1.24472	0.173896	7.15785	8.19538e-13	3.35935e-11	PF00320(GATA zinc finger)	AT5G56860	GATA type zinc finger transcription factor family protein
Medtr7g026910	1.24399	0.261216	4.76228	1.9142e-06	2.08765e-05
Medtr3g027140	1.2436	0.120964	10.2808	8.60307e-25	2.53121e-22	PF00076(RNA recognition motif. (a.k.a. RRM, RBD, or RNP domain))	AT3G52150	RNA-binding (RRM/RBD/RNP motifs) family protein
Medtr4g485550	1.24265	0.352811	3.52215	0.000428068	0.00240073		AT4G06744	Leucine-rich repeat (LRR) family protein
Medtr1g046790	1.24201	0.233559	5.31777	1.05048e-07	1.52087e-06	PF02110(Hydroxyethylthiazole kinase family)	AT3G24030	hydroxyethylthiazole kinase family protein
Medtr6g012180	1.23989	0.277856	4.46235	8.10665e-06	7.4848e-05	PF00249(Myb-like DNA-binding domain)	AT3G28910	myb domain protein 30
Medtr2g034360	1.23969	0.169446	7.31614	2.55213e-13	1.1877e-11
Medtr3g028460	1.23829	0.432873	2.86063	0.00422796	0.0169349
Medtr7g017570	1.23754	0.129992	9.5201	1.7301e-21	3.20372e-19	PF01535(PPR repeat)	AT2G31400	genomes uncoupled 1
Medtr8g058520	1.23705	0.217468	5.68842	1.28218e-08	2.28326e-07		AT4G02440	F-box family protein
Medtr0229s0020	1.23683	0.295549	4.18485	2.85358e-05	0.000227599	PF01396(Topoisomerase DNA binding C4 zinc finger)	AT4G31210	DNA topoisomerase, type IA, core
Medtr6g008900	1.2363	0.374184	3.30398	0.000953218	0.00478234	PF01501(Glycosyl transferase family 8)	AT3G28340	galacturonosyltransferase-like 10
Medtr3g437850	1.23571	0.371458	3.32665	0.000878964	0.00446313	PF00226(DnaJ domain)	AT1G59725	DNAJ heat shock family protein
Medtr4g117960	1.23557	0.320067	3.86036	0.00011322	0.000760741	PF00201(UDP-glucoronosyl and UDP-glucosyl transferase)	AT2G36770	UDP-Glycosyltransferase superfamily protein
Medtr4g071880	1.23514	0.135831	9.09315	9.62086e-20	1.36968e-17	PF00274(Fructose-bisphosphate aldolase class-I)	AT2G21330	fructose-bisphosphate aldolase 1
Medtr2g005130	1.23476	0.443692	2.78291	0.00538737	0.0207381	PF00854(POT family)	AT1G59740	Major facilitator superfamily protein
Medtr4g102220	1.23344	0.250139	4.93101	8.18035e-07	9.74868e-06	PF07279(Protein of unknown function (DUF1442))	AT2G45360	Protein of unknown function (DUF1442)
Medtr7g088820	1.23245	0.500507	2.46239	0.0138013	0.0450455	PF00854(POT family)	AT1G68570	Major facilitator superfamily protein
Medtr4g133030	1.23045	0.265747	4.63015	3.65407e-06	3.70302e-05	PF00514(Armadillo/beta-catenin-like repeat)	AT4G16143	importin alpha isoform 2
Medtr3g099590	1.22927	0.0921501	13.3398	1.35736e-40	2.56735e-37	PF00076(RNA recognition motif. (a.k.a. RRM, RBD, or RNP domain))	AT4G09040	RNA-binding (RRM/RBD/RNP motifs) family protein
Medtr4g100450	1.22774	0.284456	4.31609	1.58819e-05	0.000135406	PF00847(AP2 domain)	AT5G47230	ethylene responsive element binding factor 5
Medtr4g094340	1.22753	0.247045	4.96886	6.73468e-07	8.1394e-06	PF00892(EamA-like transporter family)	AT1G68170	nodulin MtN21 /EamA-like transporter family protein
Medtr1g108810	1.22697	0.198888	6.16917	6.86503e-10	1.5835e-08	PF01554(MatE)	AT5G52450	MATE efflux family protein
Medtr1g492630	1.22497	0.247876	4.94188	7.73711e-07	9.25796e-06		AT3G52230
Medtr3g052740	1.22164	0.342496	3.56686	0.000361278	0.00207474	PF06155(Protein of unknown function (DUF971))	AT3G27340
MT4Noble_027038	1.22025	0.410232	2.97453	0.00293436	0.0124842
Medtr8g015950	1.21939	0.408361	2.98607	0.00282589	0.0120849	PF06888(Putative Phosphatase)	AT1G17710	Pyridoxal phosphate phosphatase-related protein
Medtr3g086830	1.21913	0.463388	2.63091	0.00851568	0.0301757		AT1G72240
Medtr7g055793	1.21695	0.263659	4.61563	3.91912e-06	3.93995e-05	PF00067(Cytochrome P450)	AT5G24910	cytochrome P450, family 714, subfamily A, polypeptide 1
Medtr1g060550	1.21511	0.460604	2.63809	0.00833754	0.0296705	PF00067(Cytochrome P450)	AT2G27690	cytochrome P450, family 94, subfamily C, polypeptide 1
Medtr7g091430	1.2146	0.405647	2.99424	0.00275132	0.0118252	PF06470(SMC proteins Flexible Hinge Domain), PF02463(RecF/RecN/SMC N terminal domain)	AT5G48600	structural maintenance of chromosome 3
Medtr8g103550	1.21352	0.449076	2.70225	0.00688715	0.0253349	PF00071(Ras family)	AT4G19640	Ras-related small GTP-binding family protein
Medtr7g026210	1.21311	0.350302	3.46304	0.000534109	0.00290594		AT4G26055
Medtr5g096750	1.21187	0.266793	4.54238	5.56237e-06	5.38346e-05	PF05922(Peptidase inhibitor I9), PF02225(PA domain), PF00082(Subtilase family)	AT2G04160	Subtilisin-like serine endopeptidase family protein
Medtr3g080130	1.20961	0.232527	5.20203	1.97128e-07	2.69209e-06	PF00076(RNA recognition motif. (a.k.a. RRM, RBD, or RNP domain))	AT3G08000	RNA-binding (RRM/RBD/RNP motifs) family protein
Medtr5g092630	1.20958	0.202669	5.96822	2.39857e-09	4.9776e-08	PF01582(TIR domain)	AT3G25510	disease resistance protein (TIR-NBS-LRR class), putative
Medtr5g093830	1.20943	0.130322	9.28031	1.68988e-20	2.712e-18	PF05697(Bacterial trigger factor protein (TF)), PF05698(Bacterial trigger factor protein (TF) C-terminus)	AT5G55220	trigger factor type chaperone family protein
Medtr2g028530	1.20906	0.394189	3.06722	0.00216061	0.00965597	PF01794(Ferric reductase like transmembrane component), PF08022(FAD-binding domain), PF08030(Ferric reductase NAD binding domain)	AT5G49740	ferric reduction oxidase 7
MT4Noble_046916	1.20869	0.464476	2.60228	0.0092607	0.0324455
Medtr8g022040	1.20832	0.175943	6.86765	6.52675e-12	2.24161e-10		AT3G14110	Tetratricopeptide repeat (TPR)-like superfamily protein
Medtr2g035210	1.20456	0.308514	3.90441	9.44547e-05	0.000649147	PF00407(Pathogenesis-related protein Bet v I family)	AT1G24020	MLP-like protein 423
Medtr8g099160	1.20334	0.125726	9.57109	1.05782e-21	2.0749e-19	PF03417(Acyl-coenzyme A:6-aminopenicillanic acid acyl-transferase)
Medtr4g005960	1.19955	0.33333	3.59869	0.000319821	0.00186951	PF04627(Mitochondrial ATP synthase epsilon chain)	AT1G51650	ATP synthase epsilon chain, mitochondrial
Medtr8g013990	1.19879	0.248523	4.82367	1.40943e-06	1.59426e-05	PF07911(Protein of unknown function (DUF1677))	AT5G25840	Protein of unknown function (DUF1677)
Medtr3g053220	1.19782	0.143609	8.34083	7.37709e-17	6.57729e-15	PF02806(Alpha amylase, C-terminal all-beta domain), PF02922(Carbohydrate-binding module 48 (Isoamylase N-terminal domain)), PF00128(Alpha amylase, catalytic domain)	AT3G20440	Alpha amylase family protein
Medtr4g011020	1.19691	0.450249	2.65832	0.00785324	0.0282431	PF00903(Glyoxalase/Bleomycin resistance protein/Dioxygenase superfamily)	AT1G80160	Lactoylglutathione lyase / glyoxalase I family protein
Medtr3g057910	1.19232	0.161963	7.36168	1.81606e-13	8.74349e-12	PF00067(Cytochrome P450)	AT3G26330	cytochrome P450, family 71, subfamily B, polypeptide 37
Medtr4g093835	1.19027	0.336935	3.53263	0.000411444	0.00232502
Medtr2g095180	1.18987	0.325979	3.65013	0.000262103	0.00157524	PF00069(Protein kinase domain)	AT3G57120	Protein kinase superfamily protein
Medtr2g087200	1.18958	0.372046	3.19741	0.00138669	0.00660424	PF01535(PPR repeat)	AT1G06140	Pentatricopeptide repeat (PPR) superfamily protein
Medtr2g084375	1.18838	0.317823	3.73914	0.000184654	0.00115731		AT2G27980	Acyl-CoA N-acyltransferase with RING/FYVE/PHD-type zinc finger domain
Medtr6g012450	1.18818	0.27625	4.3011	1.6995e-05	0.000143825	PF02701(Dof domain, zinc finger)	AT5G39660	cycling DOF factor 2
Medtr3g051570	1.18745	0.341004	3.48222	0.000497268	0.00273188		AT3G20340
Medtr7g090640	1.18434	0.108511	10.9144	9.83341e-28	4.48946e-25		AT3G57180	P-loop containing nucleoside triphosphate hydrolases superfamily protein
Medtr1g013450	1.18261	0.0994908	11.8866	1.38872e-32	1.14916e-29	PF00643(B-box zinc finger), PF06203(CCT motif)	AT5G24930	CONSTANS-like 4
Medtr2g045490	1.18116	0.18561	6.36367	1.96994e-10	5.08421e-09	PF10436(Mitochondrial branched-chain alpha-ketoacid dehydrogenase kinase), PF02518(Histidine kinase-, DNA gyrase B-, and HSP90-like ATPase)	AT3G06483	pyruvate dehydrogenase kinase
Medtr2g067640	1.17987	0.363588	3.24508	0.00117417	0.00571649	PF06101(Plant protein of unknown function (DUF946))	AT2G44230	Plant protein of unknown function (DUF946)
Medtr1g112900	1.17847	0.306617	3.84347	0.000121308	0.000806483	PF04699(ARP2/3 complex 16 kDa subunit (p16-Arc))	AT4G01710	ARP2/3 complex 16 kDa subunit (p16-Arc)
Medtr7g108210	1.17667	0.459968	2.55817	0.0105225	0.0359207	PF00462(Glutaredoxin)	AT3G62950	Thioredoxin superfamily protein
Medtr3g111540	1.17521	0.20965	5.60558	2.07561e-08	3.53455e-07		AT1G48460
Medtr3g070220	1.17512	0.480475	2.44575	0.0144553	0.0467599	PF00069(Protein kinase domain), PF00560(Leucine Rich Repeat), PF08263(Leucine rich repeat N-terminal domain)	AT3G47570	Leucine-rich repeat protein kinase family protein
Medtr4g021520	1.17435	0.304601	3.85538	0.000115551	0.000774432	PF00450(Serine carboxypeptidase)	AT5G09640	serine carboxypeptidase-like 19
Medtr2g010590	1.17311	0.246444	4.76017	1.93432e-06	2.10612e-05	PF00188(Cysteine-rich secretory protein family)	AT2G14580	basic pathogenesis-related protein 1
Medtr3g103180	1.17186	0.326812	3.58574	0.000336127	0.00194933
Medtr4g478130	1.17067	0.23549	4.97123	6.65298e-07	8.05248e-06	PF00407(Pathogenesis-related protein Bet v I family)
Medtr3g079610	1.16936	0.409485	2.85568	0.0042945	0.0171469
Medtr3g100200	1.1692	0.457573	2.55522	0.0106121	0.0361657		AT4G38060
Medtr7g029620	1.16563	0.152142	7.66146	1.83837e-14	1.08178e-12		AT3G01860
Medtr4g101050	1.1646	0.269717	4.31787	1.57543e-05	0.000134529		AT4G17250
Medtr8g464870	1.16437	0.345803	3.36716	0.000759461	0.00393706	PF00931(NB-ARC domain)	AT4G27190	NB-ARC domain-containing disease resistance protein
Medtr4g089055	1.16328	0.249939	4.65427	3.25138e-06	3.33449e-05	PF00067(Cytochrome P450)	AT3G48270	cytochrome P450, family 71, subfamily A, polypeptide 26
Medtr4g011060	1.16173	0.195502	5.94228	2.81082e-09	5.74753e-08		AT1G80180
Medtr3g094060	1.16135	0.364747	3.18398	0.00145266	0.00686535	PF01357(Pollen allergen), PF03330(Rare lipoprotein A (RlpA)-like double-psi beta-barrel)	AT2G40610	expansin A8
Medtr2g036440	1.16128	0.385236	3.01446	0.00257435	0.011188	PF00069(Protein kinase domain)	AT1G34300	lectin protein kinase family protein
Medtr8g014030	1.16111	0.42447	2.73543	0.00622989	0.0233533		AT1G52140
Medtr5g089820	1.16012	0.382371	3.03401	0.00241327	0.0106072		AT5G12340
MT4Noble_054159	1.15884	0.316665	3.65951	0.0002527	0.0015253
Medtr5g016450	1.15779	0.250372	4.62429	3.75889e-06	3.80051e-05		AT4G37300	maternal effect embryo arrest 59
Medtr3g046650	1.15759	0.170894	6.77373	1.25501e-11	4.04782e-10		AT2G05642	Nucleic acid-binding, OB-fold-like protein
Medtr3g053770	1.15701	0.397183	2.91303	0.00357936	0.0147153
Medtr1g107165	1.15664	0.307987	3.75547	0.000173014	0.00109237		AT2G15020
Medtr8g447300	1.15621	0.240367	4.81019	1.50788e-06	1.69333e-05		AT1G79390
Medtr1g089920	1.15611	0.451494	2.56064	0.010448	0.0357644	PF12483(E3 Ubiquitin ligase)	AT1G63900	E3 Ubiquitin ligase family protein
Medtr1g112780	1.1559	0.456907	2.52983	0.0114117	0.0383966	PF01494(FAD binding domain)	AT5G05320	FAD/NAD(P)-binding oxidoreductase family protein
Medtr3g077410	1.15529	0.193923	5.95747	2.56171e-09	5.28715e-08	PF00106(short chain dehydrogenase)	AT5G50130	NAD(P)-binding Rossmann-fold superfamily protein
Medtr4g084630	1.15439	0.133492	8.64762	5.2585e-18	5.63745e-16	PF02536(mTERF)	AT4G38160	Mitochondrial transcription termination factor family protein
Medtr0045s0110	1.15385	0.393913	2.9292	0.00339837	0.0140916	PF04862(Protein of unknown function (DUF642))	AT3G08030	Protein of unknown function, DUF642
Medtr4g083080	1.15375	0.176446	6.53879	6.2019e-11	1.76208e-09	PF00561(alpha/beta hydrolase fold)	AT1G13820	alpha/beta-Hydrolases superfamily protein
Medtr4g123970	1.15293	0.284128	4.05779	4.95389e-05	0.000369414	PF01416(tRNA pseudouridine synthase)	AT3G06950	Pseudouridine synthase family protein
Medtr2g064370	1.15278	0.476063	2.42148	0.0154574	0.0494637	PF10184(Uncharacterized conserved protein (DUF2358))	AT1G79510	Uncharacterized conserved protein (DUF2358)
Medtr1g086790	1.15179	0.177886	6.4749	9.48754e-11	2.61971e-09	PF03106(WRKY DNA -binding domain)	AT2G47260	WRKY DNA-binding protein 23
Medtr4g062330	1.15167	0.291176	3.95525	7.64536e-05	0.000539002	PF03081(Exo70 exocyst complex subunit)	AT5G59730	exocyst subunit exo70 family protein H7
Medtr1g014320	1.1516	0.393802	2.92432	0.00345212	0.0142724	PF00171(Aldehyde dehydrogenase family)	AT2G24270	aldehyde dehydrogenase 11A3
Medtr0400s0030	1.15144	0.27046	4.25732	2.06888e-05	0.000170826	PF00069(Protein kinase domain), PF00560(Leucine Rich Repeat), PF08263(Leucine rich repeat N-terminal domain)	AT4G08850	Leucine-rich repeat receptor-like protein kinase family protein
Medtr7g065150	1.15127	0.134709	8.54632	1.27081e-17	1.29927e-15		AT5G02020
MT4Noble_055750	1.15083	0.174796	6.58382	4.58502e-11	1.32981e-09
Medtr1g049240	1.14968	0.307127	3.74334	0.000181593	0.00114083		AT4G32090	Beta-1,3-N-Acetylglucosaminyltransferase family protein
Medtr1g055425	1.14751	0.105301	10.8975	1.18482e-27	5.22901e-25	PF02221(ML domain)	AT3G11780	MD-2-related lipid recognition domain-containing protein / ML domain-containing protein
Medtr4g011970	1.14739	0.365182	3.14196	0.0016782	0.007769	PF00916(Sulfate permease family), PF01740(STAS domain)	AT3G15990	sulfate transporter 3;4
Medtr5g082610	1.14651	0.216296	5.30063	1.15405e-07	1.65723e-06	PF07034(Origin recognition complex (ORC) subunit 3 N-terminus)	AT5G16690	origin recognition complex subunit 3
Medtr4g083370	1.14633	0.112384	10.2001	1.98094e-24	5.52161e-22	PF01029(NusB family)	AT4G26370	antitermination NusB domain-containing protein
Medtr7g490310	1.14631	0.190057	6.0314	1.62544e-09	3.48234e-08	PF00072(Response regulator receiver domain)	AT3G57040	response regulator 9
Medtr5g090630	1.14604	0.278537	4.1145	3.88012e-05	0.000298073	PF00201(UDP-glucoronosyl and UDP-glucosyl transferase)	AT3G21760	UDP-Glycosyltransferase superfamily protein
Medtr1g026910	1.14373	0.154368	7.40912	1.2714e-13	6.35219e-12	PF01925(Sulfite exporter TauE/SafE)	AT2G25737	Sulfite exporter TauE/SafE family protein
Medtr1g094160	1.14274	0.139999	8.16254	3.28054e-16	2.60867e-14		AT3G10405
MT4Noble_024178	1.14264	0.329729	3.46539	0.000529461	0.00288599
Medtr2g010520	1.14218	0.120907	9.44681	3.49307e-21	6.24976e-19	PF01595(Domain of unknown function DUF21)	AT2G14520	CBS domain-containing protein with a domain of unknown function (DUF21)
Medtr6g081060	1.14168	0.221449	5.15549	2.52967e-07	3.3763e-06	PF03407(Nucleotide-diphospho-sugar transferase)	AT1G14590	Nucleotide-diphospho-sugar transferase family protein
Medtr4g113710	1.14141	0.469752	2.42981	0.0151066	0.0485642	PF00069(Protein kinase domain)	AT5G20050	Protein kinase superfamily protein
Medtr7g075610	1.1405	0.165099	6.908	4.91544e-12	1.75183e-10	PF00067(Cytochrome P450)	AT2G45550	cytochrome P450, family 76, subfamily C, polypeptide 4
Medtr5g024100	1.14001	0.415993	2.74046	0.00613533	0.0230583	PF01535(PPR repeat)	AT4G39530	Tetratricopeptide repeat (TPR)-like superfamily protein
Medtr7g087190	1.13965	0.233053	4.89009	1.00789e-06	1.17624e-05	PF00657(GDSL-like Lipase/Acylhydrolase)	AT3G26430	GDSL-like Lipase/Acylhydrolase superfamily protein
Medtr3g008010	1.13895	0.159473	7.14196	9.20064e-13	3.7367e-11	PF00201(UDP-glucoronosyl and UDP-glucosyl transferase)	AT1G22340	UDP-glucosyl transferase 85A7
Medtr4g106410	1.13814	0.193482	5.88242	4.04316e-09	7.97191e-08	PF02527(rRNA small subunit methyltransferase G)	AT5G50110	S-adenosyl-L-methionine-dependent methyltransferases superfamily protein
Medtr3g095620	1.13803	0.223201	5.09867	3.42056e-07	4.42052e-06	PF00069(Protein kinase domain)	AT1G49180	protein kinase family protein
Medtr1g055135	1.13693	0.354841	3.20406	0.00135506	0.0064699	PF00646(F-box domain), PF08268(F-box associated domain)	AT3G23880	F-box and associated interaction domains-containing protein
Medtr5g074640	1.13419	0.186531	6.08043	1.19858e-09	2.64227e-08	PF01416(tRNA pseudouridine synthase)	AT2G30320	Pseudouridine synthase family protein
Medtr1g099310	1.13396	0.415454	2.72944	0.00634425	0.0236614	PF00704(Glycosyl hydrolases family 18)	AT5G24090	chitinase A
Medtr8g040080	1.13225	0.240523	4.70745	2.50833e-06	2.64519e-05	PF05678(VQ motif)	AT2G41180	VQ motif-containing protein
Medtr4g020670	1.12936	0.410711	2.74977	0.00596374	0.0225181	PF01107(Viral movement protein (MP))
Medtr8g097160	1.12935	0.221166	5.10633	3.28467e-07	4.27411e-06	PF04104(Eukaryotic and archaeal DNA primase, large subunit)	AT1G67320	DNA primase, large subunit family
Medtr4g088400	1.12893	0.190144	5.93725	2.89846e-09	5.91759e-08	PF00067(Cytochrome P450)	AT4G31940	cytochrome P450, family 82, subfamily C, polypeptide 4
Medtr8g009280	1.12867	0.115293	9.78957	1.2482e-22	2.82498e-20	PF00166(Chaperonin 10 Kd subunit)	AT3G60210	GroES-like family protein
Medtr3g070090	1.12841	0.250566	4.50345	6.68586e-06	6.34623e-05	PF03767(HAD superfamily, subfamily IIIB (Acid phosphatase))	AT2G39920	HAD superfamily, subfamily IIIB acid phosphatase
Medtr7g089830	1.12834	0.425991	2.64874	0.0080793	0.0288991
Medtr1g016120	1.12828	0.194144	5.8116	6.18785e-09	1.17627e-07	PF02535(ZIP Zinc transporter)	AT1G10970	zinc transporter 4 precursor
Medtr0365s0020	1.1273	0.267477	4.21458	2.50241e-05	0.000201814	PF00069(Protein kinase domain), PF00560(Leucine Rich Repeat), PF08263(Leucine rich repeat N-terminal domain)	AT4G08850	Leucine-rich repeat receptor-like protein kinase family protein
Medtr3g074610	1.12687	0.157499	7.15476	8.38184e-13	3.42517e-11	PF00481(Protein phosphatase 2C)	AT1G34750	Protein phosphatase 2C family protein
Medtr7g108820	1.12618	0.231486	4.86501	1.1445e-06	1.31882e-05		AT4G02440	F-box family protein
Medtr4g106590	1.1258	0.312389	3.60385	0.000313534	0.00183762	PF00072(Response regulator receiver domain)	AT3G48100	response regulator 5
Medtr5g097180	1.1256	0.172894	6.51035	7.49739e-11	2.10755e-09	PF00450(Serine carboxypeptidase)	AT1G15000	serine carboxypeptidase-like 50
Medtr8g099065	1.12445	0.230803	4.87189	1.10534e-06	1.279e-05	PF00004(ATPase family associated with various cellular activities (AAA))	AT1G64110	P-loop containing nucleoside triphosphate hydrolases superfamily protein
Medtr1g025370	1.1231	0.406797	2.76084	0.00576534	0.0218876	PF08246(Cathepsin propeptide inhibitor domain (I29))	AT1G29110	Cysteine proteinases superfamily protein
Medtr7g091280	1.1227	0.44662	2.51376	0.0119452	0.0399129	PF04577(Protein of unknown function (DUF563))	AT2G41640	Glycosyltransferase family 61 protein
Medtr4g126120	1.12269	0.185868	6.04022	1.539e-09	3.31323e-08	PF12146(Serine aminopeptidase, S33), PF08840(BAAT / Acyl-CoA thioester hydrolase C terminal)	AT3G47590	alpha/beta-Hydrolases superfamily protein
Medtr6g075930	1.12179	0.28803	3.8947	9.83205e-05	0.000671704	PF00931(NB-ARC domain)	AT1G64070	Disease resistance protein (TIR-NBS-LRR class) family
Medtr3g088605	1.11867	0.163306	6.85016	7.37689e-12	2.50436e-10		AT1G21600	plastid transcriptionally active 6
Medtr3g030250	1.11839	0.372219	3.00465	0.0026589	0.0114839	PF00646(F-box domain)	AT3G23880	F-box and associated interaction domains-containing protein
Medtr5g080580	1.11688	0.19882	5.61755	1.93679e-08	3.31306e-07	PF03479(Domain of unknown function (DUF296))	AT4G14465	AT-hook motif nuclear-localized protein 20
Medtr5g034980	1.11627	0.152589	7.31555	2.56338e-13	1.19085e-11	PF00892(EamA-like transporter family)	AT5G40240	nodulin MtN21 /EamA-like transporter family protein
Medtr3g033420	1.11593	0.132604	8.4155	3.91236e-17	3.66076e-15	PF04542(Sigma-70 region 2 ), PF04545(Sigma-70, region 4), PF04539(Sigma-70 region 3)	AT5G13730	sigma factor 4
Medtr7g107100	1.11577	0.201535	5.53638	3.08795e-08	5.06309e-07	PF04389(Peptidase family M28), PF02225(PA domain), PF04253(Transferrin receptor-like dimerisation domain)	AT3G54720	Peptidase M28 family protein
Medtr2g015740	1.11122	0.211512	5.2537	1.49072e-07	2.09284e-06
Medtr4g127790	1.11071	0.150806	7.36514	1.76958e-13	8.55083e-12	PF00152(tRNA synthetases class II (D, K and N) )	AT3G11710	lysyl-tRNA synthetase 1
Medtr8g035760	1.11008	0.200707	5.53087	3.18646e-08	5.20527e-07	PF00067(Cytochrome P450)	AT2G45510	cytochrome P450, family 704, subfamily A, polypeptide 2
Medtr3g012060	1.10856	0.236779	4.68185	2.84294e-06	2.95683e-05	PF00931(NB-ARC domain)	AT3G07040	NB-ARC domain-containing disease resistance protein
Medtr3g096200	1.10699	0.168816	6.55736	5.47694e-11	1.56958e-09	PF04652(Vta1 like), PF02364(1,3-beta-glucan synthase component )	AT2G13680	callose synthase 5
Medtr3g099200	1.10448	0.166473	6.6346	3.25394e-11	9.7032e-10		AT2G23520	Pyridoxal phosphate (PLP)-dependent transferases superfamily protein
Medtr3g020970	1.10439	0.236504	4.66965	3.01716e-06	3.11601e-05	PF00280(Potato inhibitor I family)	AT2G38900	Serine protease inhibitor, potato inhibitor I-type family protein
Medtr1g046510	1.10415	0.150041	7.35895	1.85368e-13	8.8762e-12	PF02110(Hydroxyethylthiazole kinase family)	AT3G24030	hydroxyethylthiazole kinase family protein
Medtr2g015540	1.10401	0.440016	2.50901	0.0121068	0.0403663		AT2G31090
Medtr8g093330	1.10338	0.106001	10.4092	2.25221e-25	7.18537e-23	PF00696(Amino acid kinase family)	AT3G18680	Amino acid kinase family protein
Medtr8g093335	1.10275	0.337555	3.26687	0.00108745	0.00534439	PF05678(VQ motif)	AT3G18690	MAP kinase substrate 1
Medtr7g055900	1.10084	0.236471	4.65529	3.23529e-06	3.32057e-05
Medtr2g031560	1.10014	0.292432	3.76203	0.000168542	0.00106822	PF01565(FAD binding domain ), PF08031(Berberine and berberine like )	AT1G30700	FAD-binding Berberine family protein
Medtr8g077145	1.09924	0.402158	2.73335	0.00626934	0.0234546		AT2G18210
Medtr7g111450	1.09843	0.361098	3.04192	0.00235077	0.0103678	PF01679(Proteolipid membrane potential modulator)	AT3G05890	Low temperature and salt responsive protein family
Medtr1g031280	1.09838	0.292418	3.75622	0.000172502	0.00108992	PF07714(Protein tyrosine kinase)	AT4G18250	receptor serine/threonine kinase, putative
Medtr7g082680	1.0974	0.204715	5.36065	8.29224e-08	1.2322e-06
Medtr8g069820	1.09681	0.202645	5.41248	6.2158e-08	9.45945e-07		AT5G62960
Medtr3g048300	1.09576	0.266845	4.10635	4.01961e-05	0.000307806	PF04450(Peptidase of plants and bacteria)	AT2G42900	Plant basic secretory protein (BSP) family protein
Medtr7g091550	1.09566	0.353149	3.10256	0.00191854	0.00870959	PF00560(Leucine Rich Repeat), PF00931(NB-ARC domain)	AT3G14470	NB-ARC domain-containing disease resistance protein
Medtr8g088880	1.0947	0.325468	3.36346	0.000769721	0.00398168	PF00190(Cupin)	AT1G07750	RmlC-like cupins superfamily protein
Medtr7g010950	1.09438	0.257117	4.25638	2.07767e-05	0.000171445	PF02701(Dof domain, zinc finger)	AT5G39660	cycling DOF factor 2
Medtr7g114200	1.09275	0.278736	3.92038	8.84098e-05	0.000613493		AT1G71080	RNA polymerase II transcription elongation factor
Medtr7g112860	1.09077	0.320321	3.40524	0.000661063	0.00348773	PF05564(Dormancy/auxin associated protein)	AT1G56220	Dormancy/auxin associated family protein
Medtr2g072380	1.09067	0.178661	6.10467	1.03015e-09	2.29615e-08	PF00067(Cytochrome P450)	AT3G14690	cytochrome P450, family 72, subfamily A, polypeptide 15
Medtr7g113930	1.0903	0.208106	5.23917	1.613e-07	2.24667e-06	PF12166(Piezo non-specific cation channel, R-Ras-binding domain)	AT2G48060
Medtr1g106215	1.09015	0.34887	3.12481	0.00177917	0.00816224		AT3G19615
Medtr7g089950	1.09001	0.423734	2.57239	0.0101	0.0347742	PF01504(Phosphatidylinositol-4-phosphate 5-Kinase), PF02493(MORN repeat)	AT3G56960	phosphatidyl inositol monophosphate 5 kinase 4
Medtr1g066900	1.08923	0.116559	9.34488	9.1992e-21	1.55156e-18	PF01535(PPR repeat)	AT3G09650	Tetratricopeptide repeat (TPR)-like superfamily protein
Medtr4g057970	1.08863	0.112012	9.71881	2.50683e-22	5.31046e-20	PF00118(TCP-1/cpn60 chaperonin family)	AT2G28000	chaperonin-60alpha
Medtr6g018390	1.08751	0.240779	4.51664	6.28298e-06	5.98465e-05	PF03478(Protein of unknown function (DUF295))	AT2G17036	F-box family protein with a domain of unknown function (DUF295)
Medtr3g079480	1.0862	0.100877	10.7676	4.89491e-27	2.02527e-24	PF00201(UDP-glucoronosyl and UDP-glucosyl transferase)	AT1G22380	UDP-glucosyl transferase 85A3
Medtr4g126130	1.08604	0.339897	3.19519	0.00139738	0.00664318
Medtr5g006570	1.08601	0.230402	4.71355	2.43435e-06	2.5764e-05	PF01535(PPR repeat)	AT3G22690
Medtr1g064630	1.08437	0.258272	4.19854	2.68638e-05	0.000215627	PF00069(Protein kinase domain)	AT1G16670	Protein kinase superfamily protein
Medtr5g029470	1.08368	0.19904	5.44454	5.19403e-08	8.05728e-07	PF00249(Myb-like DNA-binding domain)	AT1G32240	Homeodomain-like superfamily protein
Medtr3g098490	1.08345	0.170982	6.33662	2.34861e-10	5.96846e-09		AT3G23760
Medtr7g087110	1.08268	0.136607	7.92551	2.27219e-15	1.56876e-13	PF00291(Pyridoxal-phosphate dependent enzyme)	AT3G03630	cysteine synthase 26
Medtr4g126360	1.08236	0.263132	4.11339	3.89887e-05	0.000299166		AT1G55160
Medtr2g101140	1.08141	0.326373	3.31342	0.000921619	0.00464936	PF07911(Protein of unknown function (DUF1677))	AT5G25840	Protein of unknown function (DUF1677)
Medtr7g095680	1.08112	0.228539	4.73058	2.23881e-06	2.40015e-05	PF00447(HSF-type DNA-binding)	AT3G22830	heat shock transcription factor A6B
Medtr5g021810	1.08015	0.222295	4.85906	1.17943e-06	1.35494e-05	PF05911(Filament-like plant protein, long coiled-coil)	AT4G36120	Plant protein of unknown function (DUF869)
Medtr5g030900	1.07983	0.102485	10.5365	5.86579e-26	2.04377e-23		AT4G37920
Medtr7g088330	1.07976	0.140947	7.66072	1.8489e-14	1.08556e-12	PF00067(Cytochrome P450)	AT3G56630	cytochrome P450, family 94, subfamily D, polypeptide 2
Medtr8g099560	1.07922	0.318603	3.38734	0.000705743	0.00369695	PF03168(Late embryogenesis abundant protein)	AT1G64450	Glycine-rich protein family
MT4Noble_040766	1.07876	0.346664	3.11184	0.00185922	0.00847809
Medtr2g031460	1.07709	0.305734	3.52296	0.000426764	0.00239704	PF01565(FAD binding domain ), PF08031(Berberine and berberine like )	AT2G34790	FAD-binding Berberine family protein
Medtr3g015430	1.07622	0.35766	3.00906	0.0026206	0.0113536
Medtr7g102280	1.07596	0.281076	3.82801	0.000129183	0.000852422		AT5G03450	Transducin/WD40 repeat-like superfamily protein
Medtr1g013130	1.07575	0.209101	5.14464	2.6804e-07	3.55529e-06		AT5G10970	C2H2 and C2HC zinc fingers superfamily protein
Medtr4g063220	1.0757	0.208018	5.17119	2.32609e-07	3.13301e-06	PF00125(Core histone H2A/H2B/H3/H4)	AT3G45980	Histone superfamily protein
Medtr1g103020	1.07548	0.147055	7.31344	2.60392e-13	1.20756e-11	PF00109(Beta-ketoacyl synthase, N-terminal domain), PF02801(Beta-ketoacyl synthase, C-terminal domain)	AT5G46290	3-ketoacyl-acyl carrier protein synthase I
Medtr8g091930	1.07528	0.154225	6.97212	3.12196e-12	1.1466e-10	PF05627(Cleavage site for pathogenic type III effector avirulence factor Avr)	AT5G09960
Medtr3g033150	1.07505	0.162126	6.63094	3.3355e-11	9.9352e-10	PF04545(Sigma-70, region 4), PF04539(Sigma-70 region 3)	AT5G13730	sigma factor 4
Medtr5g079550	1.07489	0.145407	7.39229	1.4432e-13	7.15656e-12	PF00514(Armadillo/beta-catenin-like repeat)	AT3G03440	ARM repeat superfamily protein
MT4Noble_001140	1.07404	0.332718	3.22808	0.00124623	0.00601973
Medtr0590s0020	1.07363	0.260523	4.12105	3.77156e-05	0.000290829	PF00862(Sucrose synthase)	AT5G54880	DTW domain-containing protein
Medtr6g071450	1.07308	0.419627	2.55722	0.0105513	0.0359956
Medtr4g076600	1.07277	0.170337	6.29796	3.01596e-10	7.46379e-09	PF01379(Porphobilinogen deaminase, dipyromethane cofactor binding domain), PF03900(Porphobilinogen deaminase, C-terminal domain)	AT5G08280	hydroxymethylbilane synthase
Medtr0308s0020	1.07165	0.424805	2.52269	0.0116461	0.0390514	PF01535(PPR repeat)	AT1G12700	ATP binding;nucleic acid binding;helicases
Medtr5g079715	1.06973	0.428984	2.49362	0.0126446	0.0418015
Medtr1g067000	1.06948	0.235424	4.54281	5.55096e-06	5.37831e-05	PF00249(Myb-like DNA-binding domain)	AT3G09600	Homeodomain-like superfamily protein
Medtr8g086560	1.0694	0.181116	5.90452	3.53685e-09	7.07904e-08	PF01535(PPR repeat)	AT4G18750	Pentatricopeptide repeat (PPR) superfamily protein
Medtr4g134280	1.06864	0.164905	6.48033	9.15234e-11	2.53508e-09	PF00332(Glycosyl hydrolases family 17), PF07983(X8 domain)	AT4G17180	O-Glycosyl hydrolases family 17 protein
Medtr5g009740	1.0681	0.305532	3.49588	0.000472504	0.00261591		AT5G41650	Lactoylglutathione lyase / glyoxalase I family protein
Medtr7g091390	1.06752	0.305948	3.48921	0.000484442	0.00266834		AT2G41710	Integrase-type DNA-binding superfamily protein
Medtr1g063350	1.06601	0.16105	6.61916	3.61253e-11	1.07122e-09		AT5G52970	thylakoid lumen 15.0 kDa protein
Medtr7g094760	1.06532	0.244381	4.35927	1.30498e-05	0.000114121	PF01657(Salt stress response/antifungal)	AT1G61750	Receptor-like protein kinase-related family protein
Medtr8g086060	1.06445	0.139471	7.63208	2.30991e-14	1.32682e-12		AT4G28590
Medtr1g080810	1.06322	0.218348	4.86937	1.11955e-06	1.29338e-05	PF00967(Barwin family)	AT3G04720	pathogenesis-related 4
Medtr2g100630	1.0619	0.320697	3.31124	0.000928822	0.00468034		AT1G52080	actin binding protein family
Medtr8g028430	1.0613	0.376313	2.82027	0.00479829	0.0188151	PF00150(Cellulase (glycosyl hydrolase family 5))	AT1G13130	Cellulase (glycosyl hydrolase family 5) protein
Medtr5g036660	1.06129	0.270224	3.92744	8.58533e-05	0.000598104	PF08148(DSHCT (NUC185) domain), PF00270(DEAD/DEAH box helicase), PF00271(Helicase conserved C-terminal domain)	AT1G70070	DEAD/DEAH box helicase, putative
Medtr4g094932	1.05932	0.229579	4.61419	3.94626e-06	3.96272e-05		AT5G67250	SKP1/ASK1-interacting protein 2
Medtr7g105450	1.05907	0.318848	3.32155	0.000895184	0.00453336
Medtr5g024260	1.05761	0.366597	2.88494	0.00391491	0.0158682		AT3G06240	F-box family protein
Medtr5g091615	1.05705	0.355126	2.97654	0.00291523	0.012414	PF03169(OPT oligopeptide transporter protein)	AT1G65730	YELLOW STRIPE like 7
Medtr2g069420	1.05692	0.434228	2.43401	0.0149325	0.0481036		AT2G32210
Medtr5g031390	1.05679	0.268962	3.92912	8.52579e-05	0.000594583	PF08240(Alcohol dehydrogenase GroES-like domain), PF00107(Zinc-binding dehydrogenase)	AT4G37980	elicitor-activated gene 3-1
Medtr3g078637	1.05612	0.128527	8.21711	2.08467e-16	1.705e-14	PF01571(Aminomethyltransferase folate-binding domain), PF08669(Glycine cleavage T-protein C-terminal barrel domain)	AT4G12130	Glycine cleavage T-protein family
Medtr3g098280	1.0558	0.216638	4.87359	1.09589e-06	1.26887e-05	PF01535(PPR repeat)	AT4G21065	Tetratricopeptide repeat (TPR)-like superfamily protein
Medtr2g437020	1.05454	0.295857	3.56436	0.000364741	0.00209236	PF02536(mTERF)	AT5G07900	Mitochondrial transcription termination factor family protein
Medtr3g019340	1.05435	0.289962	3.63616	0.000276734	0.00165117	PF00931(NB-ARC domain)	AT3G07040	NB-ARC domain-containing disease resistance protein
Medtr5g075370	1.05414	0.414076	2.54575	0.0109043	0.0369712	PF01434(Peptidase family M41)	AT2G26140	FTSH protease 4
Medtr8g006905	1.05409	0.328022	3.21348	0.00131135	0.00628956
Medtr4g126020	1.05273	0.342671	3.07212	0.00212545	0.00952476		AT4G33050	calmodulin-binding family protein
Medtr4g111975	1.05262	0.297531	3.53785	0.000403407	0.00228301	PF00249(Myb-like DNA-binding domain)	AT1G49010	Duplicated homeodomain-like superfamily protein
Medtr3g105050	1.05186	0.114603	9.17825	4.38142e-20	6.5548e-18		AT2G26340
Medtr4g019165	1.05144	0.111717	9.41164	4.88472e-21	8.56591e-19	PF00294(pfkB family carbohydrate kinase)	AT3G54090	fructokinase-like 1
Medtr2g435740	1.05106	0.141817	7.41135	1.25017e-13	6.25793e-12
Medtr2g006440	1.05053	0.367495	2.85864	0.00425466	0.0170212	PF00570(HRDC domain), PF00271(Helicase conserved C-terminal domain), PF09382(RQC domain), PF00270(DEAD/DEAH box helicase)	AT1G10930	DNA helicase (RECQl4A)
Medtr4g092820	1.05015	0.381935	2.74956	0.00596755	0.0225293	PF00745(Glutamyl-tRNAGlu reductase, dimerisation domain), PF01488(Shikimate / quinate 5-dehydrogenase), PF05201(Glutamyl-tRNAGlu reductase, N-terminal domain)	AT1G58290	Glutamyl-tRNA reductase family protein
Medtr6g015815	1.04995	0.401243	2.61674	0.00887745	0.0312807	PF02458(Transferase family)	AT5G39090	HXXXD-type acyl-transferase family protein
Medtr5g083530	1.04987	0.306359	3.42692	0.000610462	0.00325776	PF02153(Prephenate dehydrogenase)	AT5G34930	arogenate dehydrogenase
Medtr8g101650	1.04969	0.306534	3.42439	0.000616182	0.00328564	PF00249(Myb-like DNA-binding domain)	AT5G56840	myb-like transcription factor family protein
Medtr1g030268	1.04933	0.349044	3.0063	0.0026445	0.0114385	PF00657(GDSL-like Lipase/Acylhydrolase)	AT3G26430	GDSL-like Lipase/Acylhydrolase superfamily protein
Medtr1g032490	1.04845	0.331284	3.1648	0.00155191	0.00725284	PF00201(UDP-glucoronosyl and UDP-glucosyl transferase)	AT4G15480	UDP-Glycosyltransferase superfamily protein
Medtr4g094588	1.04763	0.318833	3.28582	0.00101685	0.00504803	PF03106(WRKY DNA -binding domain)	AT4G18170	WRKY DNA-binding protein 28
Medtr4g020110	1.04698	0.31408	3.33349	0.000857636	0.00436987	PF00171(Aldehyde dehydrogenase family), PF00696(Amino acid kinase family)	AT3G55610	delta 1-pyrroline-5-carboxylate synthase 2
Medtr7g075040	1.04685	0.301385	3.47347	0.00051378	0.00281209	PF00036(EF hand)	AT1G24620	EF hand calcium-binding protein family
Medtr3g005330	1.04652	0.309673	3.37944	0.000726327	0.00379053	PF01535(PPR repeat)	AT1G59720	Tetratricopeptide repeat (TPR)-like superfamily protein
Medtr1g055250	1.04606	0.224239	4.66494	3.08706e-06	3.18447e-05	PF07734(F-box associated)	AT3G06240	F-box family protein
Medtr1g070220	1.04498	0.353704	2.95439	0.00313291	0.0131933	PF03195(Protein of unknown function DUF260)	AT2G42430	lateral organ boundaries-domain 16
Medtr4g095065	1.04446	0.156632	6.66824	2.5889e-11	7.81689e-10	PF01535(PPR repeat)	AT4G37380	Tetratricopeptide repeat (TPR)-like superfamily protein
Medtr4g076230	1.04355	0.117647	8.87014	7.30567e-19	9.03992e-17	PF03435(Saccharopine dehydrogenase NADP binding domain)	AT1G50450	Saccharopine dehydrogenase
Medtr5g009460	1.04352	0.396788	2.62991	0.00854063	0.0302469		AT2G30420	Homeodomain-like superfamily protein
Medtr4g052500	1.04312	0.125143	8.33541	7.72289e-17	6.83953e-15		AT5G22340
Medtr7g117415	1.04211	0.159725	6.5244	6.8275e-11	1.92742e-09	PF03145(Seven in absentia protein family)	AT3G61790	Protein with RING/U-box and TRAF-like domains
Medtr4g005360	1.04179	0.242229	4.30085	1.70141e-05	0.00014394		AT3G20270	lipid-binding serum glycoprotein family protein
Medtr3g012080	1.0416	0.291398	3.57449	0.000350909	0.00202353		AT3G07040	NB-ARC domain-containing disease resistance protein
Medtr3g104880	1.04075	0.370794	2.8068	0.00500358	0.0195161		AT3G13980
Medtr5g018690	1.04023	0.303158	3.43132	0.000600646	0.00321251	PF01535(PPR repeat)	AT2G29760	Tetratricopeptide repeat (TPR)-like superfamily protein
Medtr5g026500	1.03887	0.34979	2.96998	0.00297823	0.0126424	PF00368(Hydroxymethylglutaryl-coenzyme A reductase)	AT1G76490	hydroxy methylglutaryl CoA reductase 1
Medtr4g091090	1.0374	0.427431	2.42705	0.015222	0.0488698		AT2G32210
Medtr2g098240	1.03699	0.260706	3.97764	6.96017e-05	0.000495978	PF00069(Protein kinase domain)	AT1G51170	Protein kinase superfamily protein
Medtr8g087440	1.0369	0.130197	7.96409	1.66444e-15	1.17532e-13	PF11788(39S mitochondrial ribosomal protein L46 )	AT1G14620	decoy
MT4Noble_037292	1.03641	0.168022	6.16831	6.90231e-10	1.58933e-08
Medtr8g099665	1.03624	0.195282	5.3064	1.11813e-07	1.61089e-06	PF00462(Glutaredoxin)	AT1G64500	Glutaredoxin family protein
Medtr3g075540	1.03515	0.101928	10.1557	3.12543e-24	8.31268e-22	PF00581(Rhodanese-like domain)	AT4G24750	Rhodanese/Cell cycle control phosphatase superfamily protein
Medtr8g079120	1.03507	0.222651	4.64887	3.33765e-06	3.41635e-05	PF00561(alpha/beta hydrolase fold)	AT2G23620	methyl esterase 1
Medtr1g008380	1.03473	0.266368	3.88459	0.000102504	0.000696333	PF00743(Flavin-binding monooxygenase-like)	AT5G25620	Flavin-binding monooxygenase family protein
Medtr3g089940	1.0346	0.267068	3.87392	0.000107097	0.000724372	PF00107(Zinc-binding dehydrogenase), PF08240(Alcohol dehydrogenase GroES-like domain)	AT1G77120	alcohol dehydrogenase 1
Medtr1g036510	1.03439	0.255506	4.04839	5.15709e-05	0.000381878	PF08100(Dimerisation domain), PF00891(O-methyltransferase)	AT5G54160	O-methyltransferase 1
Medtr1g083290	1.03325	0.170479	6.06086	1.35397e-09	2.95087e-08	PF08414(Respiratory burst NADPH oxidase), PF08030(Ferric reductase NAD binding domain), PF08022(FAD-binding domain), PF01794(Ferric reductase like transmembrane component)	AT1G09090	respiratory burst oxidase homolog B
Medtr7g069430	1.0326	0.210601	4.90312	9.43245e-07	1.10812e-05	PF04427(Brix domain)	AT3G15460	Ribosomal RNA processing Brix domain protein
Medtr5g034440	1.0322	0.168743	6.117	9.5351e-10	2.13612e-08	PF00514(Armadillo/beta-catenin-like repeat), PF04564(U-box domain)	AT1G60190	ARM repeat superfamily protein
Medtr8g009680	1.03187	0.147552	6.99324	2.68604e-12	1.00037e-10	PF02390(Putative methyltransferase )	AT5G17660	tRNA (guanine-N-7) methyltransferase
Medtr5g044990	1.03016	0.113176	9.10236	8.83916e-20	1.26519e-17	PF00294(pfkB family carbohydrate kinase)	AT1G69200	fructokinase-like 2
Medtr5g044260	1.02761	0.271385	3.78655	0.000152755	0.00098131	PF01535(PPR repeat)	AT1G59720	Tetratricopeptide repeat (TPR)-like superfamily protein
MT4Noble_015940	1.0275	0.363954	2.82317	0.00475518	0.0186904
Medtr1g097240	1.02617	0.352759	2.909	0.0036259	0.0148789	PF00067(Cytochrome P450)	AT2G45560	cytochrome P450, family 76, subfamily C, polypeptide 1
Medtr5g083770	1.02583	0.260588	3.9366	8.26454e-05	0.000578802	PF01490(Transmembrane amino acid transporter protein)	AT3G56200	Transmembrane amino acid transporter family protein
Medtr2g083420	1.02539	0.342564	2.99329	0.00275989	0.0118505	PF00201(UDP-glucoronosyl and UDP-glucosyl transferase)	AT5G54010	UDP-Glycosyltransferase superfamily protein
Medtr2g461250	1.02514	0.282396	3.63016	0.000283245	0.00168471		AT1G36990
Medtr5g071560	1.02476	0.20294	5.04955	4.42843e-07	5.58763e-06	PF00069(Protein kinase domain)	AT2G30040	mitogen-activated protein kinase kinase kinase 14
Medtr3g023160	1.02425	0.166303	6.15894	7.32346e-10	1.67901e-08		AT4G31560	high chlorophyll fluorescence 153
Medtr4g098660	1.02406	0.102517	9.9891	1.70117e-23	4.21e-21	PF01535(PPR repeat)	AT5G46580	pentatricopeptide (PPR) repeat-containing protein
Medtr0105s0110	1.02404	0.325697	3.14416	0.00166566	0.00771769		AT1G80630	RNI-like superfamily protein
Medtr4g116920	1.02322	0.397566	2.57372	0.0100612	0.0346677	PF00704(Glycosyl hydrolases family 18)	AT4G19810	Glycosyl hydrolase family protein with chitinase insertion domain
Medtr8g064990	1.02313	0.129435	7.90454	2.68918e-15	1.83058e-13	PF00378(Enoyl-CoA hydratase/isomerase)	AT1G60550	enoyl-CoA hydratase/isomerase D
Medtr1g070390	1.02288	0.196125	5.21545	1.83374e-07	2.52772e-06	PF00538(linker histone H1 and H5 family)	AT2G30620	winged-helix DNA-binding transcription factor family protein
Medtr3g061570	1.02071	0.229507	4.44738	8.69231e-06	7.94794e-05		AT3G20898
Medtr8g105140	1.02042	0.402245	2.53682	0.0111865	0.0377831	PF00293(NUDIX domain)	AT2G01670	nudix hydrolase homolog 17
Medtr6g012765	1.02037	0.364167	2.80192	0.00507996	0.0197762		AT4G30400	RING/U-box superfamily protein
Medtr6g083780	1.02031	0.285791	3.57012	0.000356823	0.00205361	PF07714(Protein tyrosine kinase)	AT1G66920	Protein kinase superfamily protein
Medtr5g036410	1.02026	0.311524	3.27507	0.00105635	0.00521285	PF01471(Putative peptidoglycan binding domain), PF00413(Matrixin)	AT1G70170	matrix metalloproteinase
Medtr6g016445	1.02006	0.366136	2.78602	0.0053359	0.0205879
Medtr3g079680	1.01926	0.229033	4.45026	8.57678e-06	7.86675e-05		AT4G39880	Ribosomal protein L23/L15e family protein
Medtr7g093030	1.0191	0.156745	6.5016	7.94689e-11	2.22446e-09	PF00249(Myb-like DNA-binding domain)	AT5G06800	myb-like HTH transcriptional regulator family protein
Medtr3g078800	1.0179	0.345129	2.94934	0.00318452	0.0133787	PF03168(Late embryogenesis abundant protein)	AT2G27080	Late embryogenesis abundant (LEA) hydroxyproline-rich glycoprotein family
Medtr5g071550	1.01757	0.369633	2.75292	0.00590655	0.0223341	PF00481(Protein phosphatase 2C)	AT2G30020	Protein phosphatase 2C family protein
Medtr2g436470	1.01725	0.355066	2.86495	0.00417076	0.0167387	PF01535(PPR repeat)	AT5G50990	Tetratricopeptide repeat (TPR)-like superfamily protein
Medtr5g021220	1.0166	0.401461	2.53226	0.0113331	0.0381952	PF00067(Cytochrome P450)	AT4G36380	Cytochrome P450 superfamily protein
Medtr1g054990	1.01522	0.230675	4.40107	1.07718e-05	9.61366e-05		AT3G11690
Medtr3g108060	1.01493	0.359288	2.82483	0.00473062	0.0186104	PF01535(PPR repeat)	AT1G77405	Pentatricopeptide repeat (PPR) superfamily protein
Medtr3g096750	1.01427	0.191226	5.30401	1.13287e-07	1.62946e-06	PF01789(PsbP)	AT2G28605	Photosystem II reaction center PsbP family protein
Medtr7g014620	1.01398	0.211575	4.79254	1.64686e-06	1.82847e-05	PF02458(Transferase family)	AT5G39050	HXXXD-type acyl-transferase family protein
Medtr8g039820	1.01313	0.225593	4.49095	7.09073e-06	6.67956e-05	PF01582(TIR domain), PF00931(NB-ARC domain)	AT5G17680	disease resistance protein (TIR-NBS-LRR class), putative
Medtr8g075400	1.01186	0.207372	4.87946	1.06379e-06	1.23495e-05	PF05890(Eukaryotic rRNA processing protein EBP2)	AT3G22660	rRNA processing protein-related
Medtr1g070435	1.01102	0.216084	4.67882	2.88535e-06	2.99859e-05	PF00538(linker histone H1 and H5 family)	AT2G30620	winged-helix DNA-binding transcription factor family protein
Medtr1g069610	1.01011	0.202412	4.99037	6.02641e-07	7.37428e-06		AT1G04030
Medtr5g040960	1.01009	0.414186	2.43873	0.0147388	0.0475375	PF00445(Ribonuclease T2 family)	AT2G02990	ribonuclease 1
Medtr4g057845	1.00995	0.11897	8.4891	2.08249e-17	2.05762e-15		AT3G45050
Medtr2g096100	1.00916	0.142295	7.09202	1.32169e-12	5.24713e-11	PF00125(Core histone H2A/H2B/H3/H4)	AT3G46320	Histone superfamily protein
Medtr7g015750	1.00906	0.30245	3.33628	0.000849072	0.00433374	PF00069(Protein kinase domain)	AT3G51550	Malectin/receptor-like protein kinase family protein
Medtr1g088980	1.00885	0.132384	7.62068	2.52352e-14	1.43705e-12	PF00089(Trypsin)	AT2G47940	DEGP protease 2
Medtr0038s0040	1.00871	0.26828	3.75991	0.000169971	0.00107624	PF01582(TIR domain), PF00931(NB-ARC domain)	AT5G36930	Disease resistance protein (TIR-NBS-LRR class) family
Medtr1g062130	1.00812	0.181541	5.55309	2.80663e-08	4.64065e-07	PF02133(Permease for cytosine/purines, uracil, thiamine, allantoin)	AT5G03555	permease, cytosine/purines, uracil, thiamine, allantoin family protein
Medtr1g060720	1.00609	0.279836	3.59527	0.00032405	0.00188964	PF06962(Putative rRNA methylase)	AT1G16445	S-adenosyl-L-methionine-dependent methyltransferases superfamily protein
Medtr1g013090	1.00585	0.299195	3.36186	0.000774196	0.0040017	PF00240(Ubiquitin family)	AT4G03430	pre-mRNA splicing factor-related
Medtr1g067600	1.00575	0.137608	7.30886	2.6942e-13	1.23858e-11		AT3G53560	Tetratricopeptide repeat (TPR)-like superfamily protein
Medtr2g015530	1.00558	0.409703	2.45441	0.0141117	0.0458669	PF01535(PPR repeat)	AT1G28690	Tetratricopeptide repeat (TPR)-like superfamily protein
Medtr4g088915	1.00476	0.16827	5.97111	2.35649e-09	4.8941e-08	PF05755(Rubber elongation factor protein (REF))	AT3G05500	Rubber elongation factor protein (REF)
Medtr5g023680	1.00445	0.232789	4.31485	1.59714e-05	0.000135988	PF00067(Cytochrome P450)	AT4G31500	cytochrome P450, family 83, subfamily B, polypeptide 1
Medtr3g109420	1.00426	0.256887	3.90933	9.2552e-05	0.000638057	PF01152(Bacterial-like globin)	AT4G32690	hemoglobin 3
Medtr5g073090	1.00369	0.310984	3.22747	0.00124888	0.00603034
Medtr3g063230	1.00294	0.351657	2.85203	0.00434412	0.0173093	PF11955(Plant organelle RNA recognition domain)	AT1G06440	Ubiquitin carboxyl-terminal hydrolase family protein
Medtr0405s0060	1.00181	0.399317	2.50882	0.0121136	0.0403837		AT4G38900	Basic-leucine zipper (bZIP) transcription factor family protein
Medtr4g127630	1.00155	0.340974	2.93732	0.00331064	0.0138078		AT2G19080	metaxin-related
Medtr1g030640	1.00133	0.112775	8.879	6.74612e-19	8.46623e-17	PF11805(Protein of unknown function (DUF3326))
Medtr4g028360	1.00123	0.169099	5.921	3.19996e-09	6.46831e-08		AT2G38540	lipid transfer protein 1
Medtr5g015230	1.00076	0.392771	2.54796	0.0108355	0.0367759		AT5G67640
Medtr8g093390	1.00042	0.306922	3.25954	0.00111594	0.00546719	PF05678(VQ motif)	AT3G18690	MAP kinase substrate 1
Medtr4g075510	-1.00006	0.231335	-4.32301	1.53917e-05	0.000131982
Medtr5g091980	-1.00039	0.11724	-8.53286	1.42779e-17	1.45415e-15	PF03088(Strictosidine synthase)	AT3G57030	Calcium-dependent phosphotriesterase superfamily protein
Medtr1g077580	-1.00039	0.0915925	-10.9222	9.02755e-28	4.26874e-25	PF03097(BRO1-like domain)	AT1G73390	Endosomal targeting BRO1-like domain-containing protein
Medtr3g090900	-1.00047	0.138319	-7.23308	4.72172e-13	2.06322e-11	PF04539(Sigma-70 region 3), PF04542(Sigma-70 region 2 )	AT5G24120	sigma factor E
Medtr8g099365	-1.00065	0.183667	-5.44818	5.0889e-08	7.91739e-07
Medtr8g028410	-1.00269	0.139592	-7.18305	6.81756e-13	2.84298e-11		AT2G46225	ABI-1-like 1
Medtr8g058330	-1.00286	0.126461	-7.93021	2.18771e-15	1.5165e-13	PF10559(Plug domain of Sec61p), PF00344(SecY translocase)	AT2G34250	SecY protein transport family protein
Medtr7g056103	-1.00325	0.400005	-2.50809	0.0121384	0.0404513	PF00067(Cytochrome P450)	AT5G06900	cytochrome P450, family 93, subfamily D, polypeptide 1
Medtr7g060220	-1.00328	0.286217	-3.50533	0.000456048	0.00253381	PF03140(Plant protein of unknown function)	AT3G50120	Plant protein of unknown function (DUF247)
Medtr8g432510	-1.00331	0.276329	-3.63087	0.000282467	0.00168084	PF00069(Protein kinase domain)	AT4G00720	shaggy-like protein kinase 32
Medtr1g061530	-1.00333	0.368895	-2.71981	0.00653192	0.024269	PF03479(Domain of unknown function (DUF296)), PF02178(AT hook motif)	AT4G12080	AT-hook motif nuclear-localized protein 1
Medtr8g028230	-1.0034	0.263304	-3.8108	0.000138517	0.000902266		AT5G41620
Medtr2g093010	-1.00368	0.369952	-2.71299	0.00666784	0.0246877	PF07899(Frigida-like protein)	AT5G27220	Frigida-like protein
Medtr1g110180	-1.00664	0.265901	-3.78577	0.000153234	0.00098367	PF00069(Protein kinase domain)	AT1G25390	Protein kinase superfamily protein
Medtr4g123940	-1.00665	0.312384	-3.22249	0.00127081	0.00612508	PF03822(NAF domain), PF00069(Protein kinase domain)	AT3G17510	CBL-interacting protein kinase 1
Medtr8g099945	-1.00698	0.128992	-7.80654	5.87791e-15	3.77784e-13	PF00012(Hsp70 protein)	AT5G42020	Heat shock protein 70 (Hsp 70) family protein
Medtr4g094695	-1.00807	0.187977	-5.36274	8.19688e-08	1.2194e-06	PF00702(haloacid dehalogenase-like hydrolase), PF00403(Heavy-metal-associated domain), PF00122(E1-E2 ATPase)	AT5G44790	copper-exporting ATPase / responsive-to-antagonist 1 / copper-transporting ATPase (RAN1)
Medtr8g077420	-1.00849	0.175836	-5.7354	9.72801e-09	1.77899e-07		AT1G75250	RAD-like 6
Medtr6g007980	-1.00951	0.266465	-3.78854	0.000151536	0.000975605	PF01764(Lipase (class 3))	AT5G14930	senescence-associated gene 101
Medtr2g022710	-1.01021	0.230872	-4.37564	1.21076e-05	0.000106906	PF00232(Glycosyl hydrolase family 1)	AT4G21760	beta-glucosidase 47
Medtr4g093580	-1.01107	0.169952	-5.94912	2.69584e-09	5.54123e-08	PF00795(Carbon-nitrogen hydrolase)	AT5G64370	beta-ureidopropionase
Medtr8g007140	-1.01118	0.147352	-6.86233	6.77484e-12	2.3208e-10	PF01734(Patatin-like phospholipase)	AT4G37070	Acyl transferase/acyl hydrolase/lysophospholipase superfamily protein
Medtr3g064510	-1.01129	0.303802	-3.32878	0.000872262	0.00443415	PF03330(Rare lipoprotein A (RlpA)-like double-psi beta-barrel), PF01357(Pollen allergen)	AT3G03220	expansin A13
Medtr4g115580	-1.0121	0.242593	-4.17201	3.01926e-05	0.000239574	PF03006(Haemolysin-III related)	AT5G20270	heptahelical transmembrane protein1
Medtr8g028150	-1.01274	0.24715	-4.09765	4.1736e-05	0.000317669	PF00170(bZIP transcription factor), PF07777(G-box binding protein MFMR)	AT2G46270	G-box binding factor 3
Medtr7g015950	-1.01312	0.159246	-6.362	1.99146e-10	5.13474e-09	PF04833(COBRA-like protein)	AT5G60920	COBRA-like extracellular glycosyl-phosphatidyl inositol-anchored protein family
Medtr1g018590	-1.01385	0.366916	-2.76318	0.00572412	0.0217686		AT4G24220	NAD(P)-binding Rossmann-fold superfamily protein
Medtr8g071130	-1.01391	0.147156	-6.89006	5.57673e-12	1.95592e-10	PF05368(NmrA-like family)	AT1G32100	pinoresinol reductase 1
Medtr0034s0170	-1.01474	0.175386	-5.78577	7.2183e-09	1.35465e-07	PF02358(Trehalose-phosphatase), PF00982(Glycosyltransferase family 20)	AT1G78580	trehalose-6-phosphate synthase
Medtr4g112810	-1.01692	0.17667	-5.75602	8.61182e-09	1.59024e-07	PF04371(Porphyromonas-type peptidyl-arginine deiminase)	AT5G08170	porphyromonas-type peptidyl-arginine deiminase family protein
Medtr4g006940	-1.01745	0.375408	-2.71026	0.00672302	0.0248466	PF01370(NAD dependent epimerase/dehydratase family)	AT1G15950	cinnamoyl coa reductase 1
Medtr1g010260	-1.01813	0.253951	-4.00915	6.09365e-05	0.000441356	PF07645(Calcium-binding EGF domain), PF07714(Protein tyrosine kinase), PF08488(Wall-associated kinase)	AT1G21270	wall-associated kinase 2
Medtr4g049410	-1.01889	0.403398	-2.52577	0.0115445	0.0387499
Medtr6g043790	-1.02095	0.320546	-3.18504	0.00144734	0.00684875	PF00954(S-locus glycoprotein domain), PF00069(Protein kinase domain), PF01453(D-mannose binding lectin)	AT1G34300	lectin protein kinase family protein
Medtr8g068210	-1.0213	0.393618	-2.59466	0.00946855	0.0330165	PF02701(Dof domain, zinc finger)	AT5G65590	Dof-type zinc finger DNA-binding family protein
Medtr4g051698	-1.02229	0.297803	-3.43277	0.00059744	0.00319859	PF01582(TIR domain), PF00931(NB-ARC domain)	AT5G36930	Disease resistance protein (TIR-NBS-LRR class) family
Medtr7g079080	-1.0226	0.37415	-2.73312	0.00627375	0.0234612	PF00155(Aminotransferase class I and II)	AT3G61510	ACC synthase 1
Medtr7g070200	-1.02327	0.267553	-3.82454	0.000131015	0.000862146	PF00069(Protein kinase domain), PF00560(Leucine Rich Repeat), PF08263(Leucine rich repeat N-terminal domain)	AT1G67510	Leucine-rich repeat protein kinase family protein
Medtr3g062640	-1.0246	0.256644	-3.99229	6.54376e-05	0.000468331	PF00013(KH domain)	AT2G38610	RNA-binding KH domain-containing protein
Medtr3g103110	-1.02515	0.337852	-3.03431	0.00241087	0.0106011	PF00628(PHD-finger), PF00583(Acetyltransferase (GNAT) family)	AT5G63900	Acyl-CoA N-acyltransferase with RING/FYVE/PHD-type zinc finger domain
Medtr8g083150	-1.0261	0.39854	-2.57465	0.0100341	0.0345922	PF05498(Rapid ALkalinization Factor (RALF) )	AT4G14010	ralf-like 32
Medtr7g100230	-1.02662	0.357111	-2.87481	0.00404277	0.0163115		AT3G58090	Disease resistance-responsive (dirigent-like protein) family protein
Medtr5g013780	-1.02751	0.0939484	-10.937	7.66957e-28	3.73577e-25	PF06101(Plant protein of unknown function (DUF946)), PF00169(PH domain)	AT4G17140	pleckstrin homology (PH) domain-containing protein
Medtr7g103030	-1.02779	0.25862	-3.97412	7.06404e-05	0.000502298	PF00230(Major intrinsic protein)	AT2G36830	gamma tonoplast intrinsic protein
Medtr2g450880	-1.02795	0.372117	-2.76245	0.00573699	0.0217894
Medtr1g022160	-1.02939	0.122689	-8.3902	4.85299e-17	4.43128e-15	PF00332(Glycosyl hydrolases family 17)	AT5G42720	Glycosyl hydrolase family 17 protein
Medtr8g080050	-1.02962	0.215016	-4.78859	1.6796e-06	1.86091e-05	PF00005(ABC transporter), PF00664(ABC transporter transmembrane region)	AT3G13080	multidrug resistance-associated protein 3
Medtr1g017270	-1.03042	0.217317	-4.74153	2.12106e-06	2.28223e-05	PF01946(Thi4 family), PF08491(Squalene epoxidase)	AT1G58440	FAD/NAD(P)-binding oxidoreductase family protein
Medtr7g033320	-1.03131	0.354446	-2.90964	0.00361843	0.0148552	PF02365(No apical meristem (NAM) protein)	AT1G25580	NAC (No Apical Meristem) domain transcriptional regulator superfamily protein
Medtr1g093630	-1.03183	0.271957	-3.79409	0.000148188	0.000957077	PF11721(Di-glucose binding within endoplasmic reticulum)	AT1G25570	Di-glucose binding protein with Leucine-rich repeat domain
Medtr1g007920	-1.0319	0.252019	-4.09455	4.22989e-05	0.000321324	PF00612(IQ calmodulin-binding motif)	AT3G49260	IQ-domain 21
Medtr7g094650	-1.0322	0.422934	-2.44057	0.0146642	0.0473431		AT3G63095	Tetratricopeptide repeat (TPR)-like superfamily protein
Medtr2g079050	-1.0324	0.195684	-5.27587	1.32129e-07	1.87803e-06	PF01471(Putative peptidoglycan binding domain)	AT1G59970	Matrixin family protein
Medtr1g073740	-1.03247	0.139056	-7.42485	1.12912e-13	5.72779e-12	PF03552(Cellulose synthase)	AT4G24000	cellulose synthase like G2
Medtr5g036580	-1.03367	0.239823	-4.31011	1.63172e-05	0.000138709	PF01501(Glycosyl transferase family 8)	AT1G70090	glucosyl transferase family 8
Medtr4g113335	-1.03452	0.361501	-2.86173	0.00421339	0.0168893
Medtr7g101425	-1.03475	0.256826	-4.02901	5.60134e-05	0.0004103	PF00221(Aromatic amino acid lyase)	AT2G37040	PHE ammonia lyase 1
Medtr1g097935	-1.03475	0.270917	-3.81945	0.000133752	0.000876236	PF00195(Chalcone and stilbene synthases, N-terminal domain), PF02797(Chalcone and stilbene synthases, C-terminal domain)	AT5G13930	Chalcone and stilbene synthase family protein
Medtr4g075790	-1.03508	0.272927	-3.79249	0.000149143	0.000961369	PF01357(Pollen allergen), PF03330(Rare lipoprotein A (RlpA)-like double-psi beta-barrel)	AT4G38400	expansin-like A2
Medtr1g025490	-1.0355	0.329815	-3.13964	0.00169153	0.00782252		AT1G75810
Medtr8g019020	-1.03617	0.247995	-4.17819	2.93843e-05	0.000233718		AT4G13266
Medtr4g091240	-1.03727	0.1014	-10.2294	1.46349e-24	4.12269e-22	PF07992(Pyridine nucleotide-disulphide oxidoreductase), PF00070(Pyridine nucleotide-disulphide oxidoreductase)	AT4G05020	NAD(P)H dehydrogenase B2
Medtr3g022400	-1.03739	0.269764	-3.84555	0.000120281	0.000801467	PF00931(NB-ARC domain)	AT3G14460	LRR and NB-ARC domains-containing disease resistance protein
MT4Noble_024364	-1.03763	0.323252	-3.20998	0.00132745	0.00635296
Medtr4g126970	-1.0379	0.161614	-6.42213	1.34383e-10	3.58202e-09	PF07714(Protein tyrosine kinase)	AT2G17220	Protein kinase superfamily protein
Medtr4g113530	-1.03853	0.38679	-2.685	0.00725296	0.0264071	PF00023(Ankyrin repeat), PF00520(Ion transport protein), PF11834(KHA, dimerisation domain of potassium ion channel), PF00027(Cyclic nucleotide-binding domain)	AT2G26650	K+ transporter 1
Medtr7g033410	-1.03995	0.371724	-2.79764	0.00514769	0.0200045	PF03404(Mo-co oxidoreductase dimerisation domain), PF00174(Oxidoreductase molybdopterin binding domain)	AT3G01910	sulfite oxidase
Medtr4g127480	-1.04023	0.239906	-4.33598	1.45113e-05	0.000125493	PF02225(PA domain), PF05922(Peptidase inhibitor I9), PF00082(Subtilase family), PF06280(Fn3-like domain)	AT4G30020	PA-domain containing subtilase family protein
Medtr1g013790	-1.04034	0.218957	-4.75137	2.02045e-06	2.18552e-05	PF03106(WRKY DNA -binding domain)	AT1G80840	WRKY DNA-binding protein 40
Medtr1g105650	-1.04055	0.2035	-5.11324	3.16682e-07	4.13906e-06	PF07714(Protein tyrosine kinase), PF01657(Salt stress response/antifungal)	AT4G05200	cysteine-rich RLK (RECEPTOR-like protein kinase) 25
MT4Noble_026511	-1.04073	0.280083	-3.71577	0.000202583	0.0012563
Medtr1g008500	-1.04092	0.194395	-5.35468	8.57087e-08	1.27098e-06	PF03181(BURP domain)	AT5G25610	BURP domain-containing protein
Medtr3g101400	-1.04194	0.373365	-2.79067	0.00525984	0.0203508	PF01734(Patatin-like phospholipase)	AT2G26560	phospholipase A 2A
Medtr3g041560	-1.04203	0.273084	-3.81578	0.000135754	0.000887598	PF00560(Leucine Rich Repeat), PF08263(Leucine rich repeat N-terminal domain)	AT1G17250	receptor like protein 3
Medtr4g127220	-1.04285	0.161289	-6.46574	1.00802e-10	2.76317e-09	PF12146(Serine aminopeptidase, S33)	AT1G52760	lysophospholipase 2
Medtr1g096200	-1.04289	0.0953631	-10.9359	7.75934e-28	3.73577e-25		AT1G34340	alpha/beta-Hydrolases superfamily protein
Medtr5g020990	-1.04324	0.204342	-5.10539	3.30106e-07	4.28911e-06	PF00004(ATPase family associated with various cellular activities (AAA))	AT2G18193	P-loop containing nucleoside triphosphate hydrolases superfamily protein
Medtr1g104890	-1.04426	0.22934	-4.55334	5.28019e-06	5.13959e-05	PF01657(Salt stress response/antifungal)	AT4G05200	cysteine-rich RLK (RECEPTOR-like protein kinase) 25
Medtr0184s0040	-1.04438	0.234672	-4.45036	8.57254e-06	7.86559e-05	PF00201(UDP-glucoronosyl and UDP-glucosyl transferase)	AT4G01070	UDP-Glycosyltransferase superfamily protein
Medtr7g117395	-1.04648	0.182725	-5.7271	1.02159e-08	1.8605e-07	PF00240(Ubiquitin family), PF00454(Phosphatidylinositol 3- and 4-kinase)	AT2G46500	phosphoinositide 4-kinase gamma 4
Medtr1g027700	-1.04656	0.303446	-3.44891	0.000562857	0.00303801	PF07714(Protein tyrosine kinase)	AT1G70250	receptor serine/threonine kinase, putative
Medtr1g064060	-1.04695	0.118711	-8.81929	1.15183e-18	1.38011e-16	PF00294(pfkB family carbohydrate kinase)	AT5G03300	adenosine kinase 2
Medtr1g022290	-1.04702	0.333985	-3.13494	0.0017189	0.00792832	PF00249(Myb-like DNA-binding domain)	AT4G39250	RAD-like 1
Medtr3g109030	-1.04723	0.319729	-3.27538	0.00105518	0.00521	PF00027(Cyclic nucleotide-binding domain)	AT2G24610	cyclic nucleotide-gated channel 14
Medtr7g082700	-1.04811	0.433259	-2.41913	0.0155576	0.0497242		AT2G47485
Medtr2g062920	-1.04825	0.193134	-5.42759	5.71185e-08	8.78848e-07	PF08442(ATP-grasp domain)	AT1G60810	ATP-citrate lyase A-2
Medtr1g081230	-1.05132	0.334451	-3.14342	0.00166987	0.00773588	PF02466(Tim17/Tim22/Tim23/Pmp24 family)	AT1G17530	translocase of inner mitochondrial membrane 23
Medtr5g012920	-1.05223	0.146472	-7.18386	6.77719e-13	2.83507e-11	PF02770(Acyl-CoA dehydrogenase, middle domain), PF01756(Acyl-CoA oxidase)	AT4G16760	acyl-CoA oxidase 1
Medtr1g041285	-1.05229	0.24493	-4.29631	1.73665e-05	0.000146501	PF00036(EF hand)	AT3G22930	calmodulin-like 11
Medtr3g079390	-1.05266	0.318841	-3.30154	0.000961573	0.00481332	PF03140(Plant protein of unknown function)	AT3G60470	Plant protein of unknown function (DUF247)
Medtr3g028260	-1.0528	0.404505	-2.60268	0.00924987	0.0324162
Medtr8g089830	-1.05283	0.162781	-6.46778	9.94522e-11	2.72901e-09
Medtr0087s0030	-1.05283	0.285793	-3.68389	0.0002297	0.0014031	PF00560(Leucine Rich Repeat)	AT2G34930	disease resistance family protein / LRR family protein
Medtr7g033770	-1.05307	0.277571	-3.79388	0.00014831	0.000957248	PF02788(Ribulose bisphosphate carboxylase large chain, N-terminal domain), PF00016(Ribulose bisphosphate carboxylase large chain, catalytic domain)	ATCG00490	ribulose-bisphosphate carboxylases
Medtr1g110210	-1.05337	0.261857	-4.02267	5.75415e-05	0.000419174	PF00481(Protein phosphatase 2C)	AT1G68410	Protein phosphatase 2C family protein
Medtr7g011800	-1.05389	0.374611	-2.81329	0.00490369	0.0191769	PF00069(Protein kinase domain)	AT5G39420	CDC2C
Medtr2g040500	-1.05425	0.244856	-4.30558	1.66547e-05	0.000141261	PF00481(Protein phosphatase 2C)	AT1G72770	homology to ABI1
Medtr2g461270	-1.0545	0.269912	-3.90682	9.35185e-05	0.00064405		AT2G46490
Medtr2g063110	-1.05512	0.254253	-4.14987	3.32659e-05	0.000260385	PF00026(Eukaryotic aspartyl protease)	AT3G12700	Eukaryotic aspartyl protease family protein
Medtr2g086090	-1.05667	0.218035	-4.84634	1.25758e-06	1.43537e-05	PF07993(Male sterility protein), PF03015(Male sterility protein)	AT4G33790	Jojoba acyl CoA reductase-related male sterility protein
Medtr3g072210	-1.05687	0.299131	-3.53314	0.000410655	0.00232105	PF00141(Peroxidase)	AT4G36430	Peroxidase superfamily protein
Medtr2g046710	-1.05773	0.110436	-9.57782	9.91115e-22	1.95856e-19	PF02772(S-adenosylmethionine synthetase, central domain), PF00438(S-adenosylmethionine synthetase, N-terminal domain), PF02773(S-adenosylmethionine synthetase, C-terminal domain)	AT3G17390	S-adenosylmethionine synthetase family protein
Medtr4g090970	-1.05828	0.36698	-2.88377	0.00392949	0.015909	PF07887(Calmodulin binding protein-like)	AT5G57580	Calmodulin-binding protein
Medtr6g033100	-1.05833	0.301485	-3.51039	0.000447451	0.00249075	PF05653(Magnesium transporter NIPA)	AT3G26670	Protein of unknown function (DUF803)
Medtr5g074970	-1.05839	0.162817	-6.50048	8.00638e-11	2.23638e-09	PF00141(Peroxidase)	AT5G58390	Peroxidase superfamily protein
Medtr4g059730	-1.05872	0.304191	-3.48043	0.00050061	0.00274739	PF02798(Glutathione S-transferase, N-terminal domain), PF00043(Glutathione S-transferase, C-terminal domain)	AT3G09270	glutathione S-transferase TAU 8
Medtr2g075770	-1.05878	0.417888	-2.53363	0.0112886	0.0380916	PF07722(Peptidase C26)	AT1G78660	gamma-glutamyl hydrolase 1
Medtr2g062660	-1.05942	0.23365	-4.53422	5.78162e-06	5.56312e-05	PF00063(Myosin head (motor domain)), PF00612(IQ calmodulin-binding motif), PF02736(Myosin N-terminal SH3-like domain), PF01843(DIL domain)	AT2G31900	myosin-like protein XIF
Medtr0470s0010	-1.061	0.231167	-4.58978	4.43717e-06	4.40391e-05		AT4G13266
Medtr5g030990	-1.06114	0.375893	-2.82297	0.00475804	0.0186989
Medtr4g123030	-1.06225	0.229129	-4.63603	3.55159e-06	3.61299e-05	PF04853()	AT3G06500	Plant neutral invertase family protein
Medtr7g065890	-1.06268	0.396347	-2.68117	0.00733646	0.0266634		AT2G37940	Arabidopsis Inositol phosphorylceramide synthase 2
Medtr4g051738	-1.06298	0.246803	-4.30701	1.65477e-05	0.000140444	PF01582(TIR domain), PF00931(NB-ARC domain)	AT5G36930	Disease resistance protein (TIR-NBS-LRR class) family
Medtr6g034975	-1.06321	0.233922	-4.54514	5.4898e-06	5.32881e-05	PF01988(VIT family)	AT3G43660	Vacuolar iron transporter (VIT) family protein
Medtr1g022455	-1.06532	0.389575	-2.73458	0.00624607	0.0234007	PF03492(SAM dependent carboxyl methyltransferase)	AT1G19640	jasmonic acid carboxyl methyltransferase
Medtr4g011880	-1.06567	0.205296	-5.19086	2.0932e-07	2.84245e-06	PF02309(AUX/IAA family)	AT3G15540	indole-3-acetic acid inducible 19
Medtr3g103410	-1.06779	0.235559	-4.53302	5.81464e-06	5.5888e-05	PF11443(Domain of unknown function (DUF2828))	AT5G13210	Uncharacterised conserved protein UCP015417, vWA
Medtr5g030600	-1.06787	0.208804	-5.11424	3.15013e-07	4.12335e-06	PF08323(Starch synthase catalytic domain)	AT5G65685	UDP-Glycosyltransferase superfamily protein
Medtr5g081460	-1.06841	0.399987	-2.67111	0.00756	0.0273557		AT2G39870
Medtr1g442790	-1.06846	0.200703	-5.32358	1.01745e-07	1.47708e-06	PF00433(Protein kinase C terminal domain), PF00069(Protein kinase domain)	AT4G14350	AGC (cAMP-dependent, cGMP-dependent and protein kinase C) kinase family protein
Medtr0419s0050	-1.06879	0.336314	-3.17794	0.00148323	0.00697993	PF00534(Glycosyl transferases group 1)	AT1G73370	sucrose synthase 6
Medtr1g090770	-1.06894	0.424515	-2.51804	0.0118011	0.0394763
Medtr5g018290	-1.06948	0.311176	-3.43688	0.000588447	0.00315682	PF07731(Multicopper oxidase)	AT5G66920	SKU5 similar 17
Medtr5g048160	-1.06951	0.385726	-2.77273	0.00555886	0.0212592	PF00646(F-box domain)	AT3G06240	F-box family protein
MT4Noble_026513	-1.0719	0.12766	-8.39659	4.59631e-17	4.22605e-15
MT4Noble_026512	-1.07286	0.19826	-5.41136	6.25471e-08	9.50773e-07
Medtr4g094608	-1.07347	0.404257	-2.65542	0.00792088	0.0284284
Medtr2g069320	-1.07358	0.185854	-5.77646	7.62888e-09	1.42162e-07	PF03144(Elongation factor Tu domain 2), PF00679(Elongation factor G C-terminus), PF00009(Elongation factor Tu GTP binding domain), PF03764(Elongation factor G, domain IV)	AT1G56070	Ribosomal protein S5/Elongation factor G/III/V family protein
Medtr1g094930	-1.07487	0.276491	-3.88754	0.000101266	0.000689513	PF00320(GATA zinc finger)	AT3G54810	Plant-specific GATA-type zinc finger transcription factor family protein
Medtr8g099515	-1.07635	0.254022	-4.23723	2.26298e-05	0.000184608	PF00097(Zinc finger, C3HC4 type (RING finger))	AT5G53110	RING/U-box superfamily protein
Medtr2g011660	-1.07701	0.338674	-3.18007	0.00147241	0.00693761	PF00249(Myb-like DNA-binding domain)	AT4G21440	MYB-like 102
Medtr7g106760	-1.07717	0.176952	-6.08735	1.14792e-09	2.54156e-08	PF02469(Fasciclin domain)	AT2G35860	FASCICLIN-like arabinogalactan protein 16 precursor
Medtr8g073130	-1.07765	0.131034	-8.22425	1.96423e-16	1.6305e-14	PF03094(Mlo family)	AT2G17480	Seven transmembrane MLO family protein
Medtr7g096120	-1.07822	0.180225	-5.98262	2.19573e-09	4.58903e-08	PF01764(Lipase (class 3))	AT2G30550	alpha/beta-Hydrolases superfamily protein
Medtr2g028190	-1.08224	0.197122	-5.4902	4.01469e-08	6.3811e-07	PF00026(Eukaryotic aspartyl protease)	AT5G10770	Eukaryotic aspartyl protease family protein
Medtr7g116870	-1.08321	0.39903	-2.71462	0.00663518	0.024594	PF00657(GDSL-like Lipase/Acylhydrolase)	AT4G01130	GDSL-like Lipase/Acylhydrolase superfamily protein
Medtr8g038370	-1.08377	0.269348	-4.02369	5.72925e-05	0.000417705	PF03145(Seven in absentia protein family)	AT3G61790	Protein with RING/U-box and TRAF-like domains
Medtr5g091190	-1.08421	0.26996	-4.01618	5.91497e-05	0.00042964		AT2G42975
Medtr1g098680	-1.08483	0.134015	-8.09481	5.73528e-16	4.41483e-14	PF02496(ABA/WDS induced protein)
Medtr2g014020	-1.08515	0.370767	-2.92676	0.00342512	0.014179	PF00400(WD domain, G-beta repeat)	AT2G32700	LEUNIG_homolog
Medtr4g052460	-1.08521	0.24468	-4.43524	9.19714e-06	8.34899e-05	PF00646(F-box domain)	AT3G44326	F-box family protein
Medtr8g104490	-1.08525	0.425672	-2.54949	0.0107881	0.0366619	PF07887(Calmodulin binding protein-like)	AT1G73805	Calmodulin binding protein-like
Medtr4g005190	-1.08527	0.34131	-3.17972	0.00147415	0.00694213	PF00432(Prenyltransferase and squalene oxidase repeat)	AT1G78950	Terpenoid cyclases family protein
Medtr5g022880	-1.08542	0.221501	-4.9003	9.56926e-07	1.1237e-05	PF00026(Eukaryotic aspartyl protease)	AT2G17760	Eukaryotic aspartyl protease family protein
Medtr4g022430	-1.08576	0.22474	-4.83117	1.35735e-06	1.53798e-05	PF02803(Thiolase, C-terminal domain), PF00108(Thiolase, N-terminal domain)	AT2G33150	peroxisomal 3-ketoacyl-CoA thiolase 3
Medtr2g069350	-1.08626	0.261981	-4.14633	3.37841e-05	0.000263894		AT3G12920	SBP (S-ribonuclease binding protein) family protein
Medtr2g100060	-1.08636	0.242815	-4.47402	7.67611e-06	7.14459e-05	PF03168(Late embryogenesis abundant protein)	AT1G17620	Late embryogenesis abundant (LEA) hydroxyproline-rich glycoprotein family
Medtr3g102010	-1.08648	0.264101	-4.11386	3.89089e-05	0.000298727	PF02458(Transferase family)	AT5G42830	HXXXD-type acyl-transferase family protein
Medtr8g011300	-1.0865	0.244664	-4.44078	8.96345e-06	8.16485e-05	PF00931(NB-ARC domain)	AT3G14470	NB-ARC domain-containing disease resistance protein
Medtr8g042770	-1.08681	0.371519	-2.92532	0.00344107	0.0142374	PF07690(Major Facilitator Superfamily)	AT5G13750	zinc induced facilitator-like 1
Medtr2g054940	-1.08756	0.267954	-4.05876	4.93332e-05	0.000368161	PF08392(FAE1/Type III polyketide synthase-like protein), PF08541(3-Oxoacyl-[acyl-carrier-protein (ACP)] synthase III C terminal )	AT2G26640	3-ketoacyl-CoA synthase 11
Medtr1g026820	-1.08784	0.179802	-6.05021	1.4466e-09	3.12702e-08	PF01241(Photosystem I psaG / psaK)	AT1G30380	photosystem I subunit K
Medtr2g019860	-1.08812	0.297253	-3.66059	0.000251636	0.00151992	PF01344(Kelch motif)	AT5G18590	Galactose oxidase/kelch repeat superfamily protein
Medtr2g090675	-1.08822	0.187788	-5.79495	6.83427e-09	1.28805e-07	PF00249(Myb-like DNA-binding domain)	AT2G20570	GBF\'s pro-rich region-interacting factor 1
Medtr5g019220	-1.08874	0.225325	-4.83186	1.35264e-06	1.53462e-05	PF01501(Glycosyl transferase family 8)	AT3G50760	galacturonosyltransferase-like 2
Medtr4g088160	-1.08997	0.403766	-2.69952	0.00694403	0.0254941	PF00067(Cytochrome P450)	AT5G06900	cytochrome P450, family 93, subfamily D, polypeptide 1
MT4Noble_034374	-1.09045	0.446798	-2.44059	0.0146633	0.0473431
Medtr8g032030	-1.091	0.237095	-4.60153	4.194e-06	4.18609e-05	PF00106(short chain dehydrogenase)	AT3G61220	NAD(P)-binding Rossmann-fold superfamily protein
Medtr5g012220	-1.09168	0.318216	-3.43063	0.000602191	0.00321817		AT1G62520
Medtr4g062170	-1.09194	0.165858	-6.58358	4.59243e-11	1.3305e-09	PF08392(FAE1/Type III polyketide synthase-like protein), PF08541(3-Oxoacyl-[acyl-carrier-protein (ACP)] synthase III C terminal )	AT2G28630	3-ketoacyl-CoA synthase 12
Medtr2g034440	-1.09242	0.140652	-7.76685	8.04635e-15	5.06098e-13	PF00332(Glycosyl hydrolases family 17)	AT4G16260	Glycosyl hydrolase superfamily protein
Medtr4g068240	-1.09249	0.208731	-5.23398	1.65901e-07	2.30607e-06	PF03711(Orn/Lys/Arg decarboxylase, C-terminal domain), PF01276(Orn/Lys/Arg decarboxylase, major domain)
Medtr2g435340	-1.09288	0.182585	-5.98558	2.15615e-09	4.517e-08	PF00295(Glycosyl hydrolases family 28)	AT3G06770	Pectin lyase-like superfamily protein
Medtr8g020300	-1.09323	0.289274	-3.77924	0.000157309	0.00100549	PF00931(NB-ARC domain), PF01582(TIR domain)	AT5G41750	Disease resistance protein (TIR-NBS-LRR class) family
Medtr2g027410	-1.09359	0.424336	-2.57719	0.0099607	0.0343921	PF03000(NPH3 family)	AT5G47800	Phototropic-responsive NPH3 family protein
Medtr7g106050	-1.09432	0.179043	-6.11203	9.83719e-10	2.19822e-08	PF03168(Late embryogenesis abundant protein)	AT3G11660	NDR1/HIN1-like 1
Medtr3g094650	-1.09445	0.218712	-5.00407	5.61319e-07	6.90693e-06	PF00141(Peroxidase)	AT5G05340	Peroxidase superfamily protein
Medtr0078s0190	-1.09485	0.250413	-4.37218	1.23009e-05	0.000108396	PF00201(UDP-glucoronosyl and UDP-glucosyl transferase)	AT4G01070	UDP-Glycosyltransferase superfamily protein
Medtr1g009270	-1.09612	0.417403	-2.62604	0.00863838	0.0305481	PF00560(Leucine Rich Repeat), PF08263(Leucine rich repeat N-terminal domain), PF00069(Protein kinase domain)	AT4G31250	Leucine-rich repeat protein kinase family protein
Medtr7g006540	-1.09618	0.240674	-4.55462	5.24792e-06	5.11277e-05	PF00854(POT family)	AT5G13400	Major facilitator superfamily protein
Medtr3g008160	-1.09646	0.308844	-3.55023	0.000384899	0.00218952	PF00083(Sugar (and other) transporter)	AT5G61520	Major facilitator superfamily protein
Medtr5g026620	-1.09771	0.15563	-7.05335	1.74658e-12	6.77151e-11	PF01786(Alternative oxidase)	AT3G22370	alternative oxidase 1A
Medtr2g090250	-1.09817	0.401879	-2.73259	0.00628378	0.0234896	PF00139(Legume lectin domain), PF00069(Protein kinase domain)	AT4G04960	Concanavalin A-like lectin protein kinase family protein
Medtr5g010520	-1.10087	0.259711	-4.23884	2.24675e-05	0.000183453		AT1G63300	Myosin heavy chain-related protein
Medtr4g059870	-1.10129	0.178564	-6.16747	6.93913e-10	1.59642e-08		AT3G45260	C2H2-like zinc finger protein
Medtr8g104520	-1.10316	0.219425	-5.02753	4.96843e-07	6.19124e-06	PF07714(Protein tyrosine kinase)	AT1G66910	Protein kinase superfamily protein
Medtr1g094155	-1.10369	0.134285	-8.21902	2.0518e-16	1.69257e-14	PF00450(Serine carboxypeptidase)	AT3G10410	SERINE CARBOXYPEPTIDASE-LIKE 49
Medtr1g105800	-1.10398	0.297643	-3.70907	0.000208025	0.00128733	PF00069(Protein kinase domain), PF01657(Salt stress response/antifungal)	AT4G23180	cysteine-rich RLK (RECEPTOR-like protein kinase) 10
Medtr4g028080	-1.10456	0.313056	-3.52832	0.0004182	0.0023577	PF03911(Sec61beta family)	AT3G60540	Preprotein translocase Sec, Sec61-beta subunit protein
Medtr7g117405	-1.10501	0.299868	-3.68498	0.00022872	0.00139841	PF00201(UDP-glucoronosyl and UDP-glucosyl transferase)	AT2G36780	UDP-Glycosyltransferase superfamily protein
Medtr8g060850	-1.10529	0.265313	-4.16597	3.10025e-05	0.000245278		AT3G15353	metallothionein 3
Medtr2g012320	-1.10577	0.417559	-2.64818	0.00809273	0.0289353	PF05553(Cotton fibre expressed protein)	AT1G61260	Protein of unknown function (DUF761)
Medtr3g090120	-1.10596	0.402328	-2.74891	0.0059794	0.022558	PF03005()	AT1G48880	TRICHOME BIREFRINGENCE-LIKE 7
Medtr3g077640	-1.1061	0.10863	-10.1823	2.37909e-24	6.56233e-22	PF00892(EamA-like transporter family), PF03151(Triose-phosphate Transporter family)	AT5G33320	Glucose-6-phosphate/phosphate translocator-related
Medtr3g014615	-1.10637	0.203881	-5.42656	5.74517e-08	8.82437e-07
Medtr7g096340	-1.1065	0.351216	-3.15048	0.00163002	0.0075791	PF00067(Cytochrome P450)	AT5G63450	cytochrome P450, family 94, subfamily B, polypeptide 1
Medtr1g089280	-1.10729	0.45256	-2.44672	0.0144163	0.0466508	PF00560(Leucine Rich Repeat), PF08263(Leucine rich repeat N-terminal domain)	AT1G03440	Leucine-rich repeat (LRR) family protein
Medtr4g014350	-1.10738	0.268938	-4.11761	3.82818e-05	0.000294424	PF00069(Protein kinase domain), PF04689(DNA binding protein S1FA), PF00560(Leucine Rich Repeat), PF08263(Leucine rich repeat N-terminal domain)	AT1G67510	Leucine-rich repeat protein kinase family protein
Medtr4g119830	-1.10784	0.214642	-5.16134	2.45194e-07	3.2858e-06	PF00481(Protein phosphatase 2C)	AT3G16560	Protein phosphatase 2C family protein
Medtr6g083270	-1.10797	0.271043	-4.0878	4.35478e-05	0.000329847	PF00967(Barwin family), PF00069(Protein kinase domain)	AT1G66980	suppressor of npr1-1 constitutive 4
Medtr7g013180	-1.10883	0.229168	-4.8385	1.30825e-06	1.48936e-05	PF00201(UDP-glucoronosyl and UDP-glucosyl transferase)	AT3G02100	UDP-Glycosyltransferase superfamily protein
Medtr8g470380	-1.1091	0.260148	-4.26333	2.014e-05	0.000166815	PF08263(Leucine rich repeat N-terminal domain), PF00560(Leucine Rich Repeat)	AT5G20480	EF-TU receptor
Medtr6g023340	-1.11011	0.268092	-4.14078	3.46132e-05	0.000269973	PF00704(Glycosyl hydrolases family 18)	AT5G24090	chitinase A
Medtr6g015310	-1.11012	0.430359	-2.57953	0.00989361	0.0342148	PF02458(Transferase family)	AT3G29590	HXXXD-type acyl-transferase family protein
Medtr4g082883	-1.11106	0.244471	-4.54474	5.50031e-06	5.33706e-05
Medtr4g099140	-1.1115	0.156995	-7.07983	1.44328e-12	5.67876e-11	PF03908(Sec20)	AT2G35190	novel plant snare 11
Medtr3g074830	-1.11238	0.439797	-2.52929	0.0114293	0.0384362	PF04674(Phosphate-induced protein 1 conserved region)	AT4G08950	Phosphate-responsive 1 family protein
Medtr3g072260	-1.1127	0.353782	-3.14516	0.00165994	0.00769525	PF00141(Peroxidase)	AT5G05340	Peroxidase superfamily protein
Medtr4g052290	-1.11372	0.298887	-3.72624	0.000194359	0.00121154	PF11721(Di-glucose binding within endoplasmic reticulum), PF07714(Protein tyrosine kinase)	AT3G51550	Malectin/receptor-like protein kinase family protein
Medtr2g095430	-1.1139	0.370839	-3.00373	0.00266689	0.0115127	PF02519(Auxin responsive protein)	AT2G28085	SAUR-like auxin-responsive protein family
Medtr5g066187	-1.11446	0.446247	-2.4974	0.0125108	0.0414316
Medtr3g009030	-1.11523	0.127533	-8.7446	2.23798e-18	2.55438e-16	PF00150(Cellulase (glycosyl hydrolase family 5))
Medtr7g010750	-1.11546	0.201042	-5.54841	2.88286e-08	4.74445e-07	PF01490(Transmembrane amino acid transporter protein)	AT3G28960	Transmembrane amino acid transporter family protein
MT4Noble_017811	-1.11563	0.200778	-5.55652	2.75209e-08	4.55755e-07
Medtr1g022245	-1.11591	0.332816	-3.35294	0.000799592	0.00411118	PF00004(ATPase family associated with various cellular activities (AAA))	AT3G28510	P-loop containing nucleoside triphosphate hydrolases superfamily protein
Medtr7g087570	-1.11693	0.301752	-3.70148	0.000214344	0.0013215	PF03959(Serine hydrolase (FSH1))	AT4G24380
Medtr1g086170	-1.11773	0.365866	-3.05502	0.00225048	0.00999542		AT2G47010
Medtr7g069540	-1.1181	0.153467	-7.2856	3.20249e-13	1.44467e-11	PF02775(Thiamine pyrophosphate enzyme, C-terminal TPP binding domain), PF02776(Thiamine pyrophosphate enzyme, N-terminal TPP binding domain), PF00205(Thiamine pyrophosphate enzyme, central domain)	AT5G54960	pyruvate decarboxylase-2
Medtr2g035170	-1.11883	0.230809	-4.84744	1.25066e-06	1.42994e-05	PF00407(Pathogenesis-related protein Bet v I family)
Medtr4g114710	-1.11891	0.442535	-2.52841	0.0114582	0.0385138	PF01733(Nucleoside transporter)	AT1G02630	Nucleoside transporter family protein
Medtr0419s0040	-1.11919	0.344059	-3.25291	0.00114231	0.00557677	PF01582(TIR domain), PF00931(NB-ARC domain)	AT5G36930	Disease resistance protein (TIR-NBS-LRR class) family
Medtr8g089670	-1.11942	0.196259	-5.70378	1.17176e-08	2.1054e-07	PF07002(Copine)	AT5G14420	RING domain ligase2
Medtr5g075450	-1.11969	0.120408	-9.29915	1.41574e-20	2.3285e-18	PF00067(Cytochrome P450)	AT2G30490	cinnamate-4-hydroxylase
Medtr8g087425	-1.12097	0.0949392	-11.8072	3.58238e-32	2.87459e-29	PF02798(Glutathione S-transferase, N-terminal domain), PF00043(Glutathione S-transferase, C-terminal domain)	AT2G29420	glutathione S-transferase tau 7
Medtr6g083730	-1.12108	0.338978	-3.30724	0.000942209	0.00473699	PF07887(Calmodulin binding protein-like)	AT1G73805	Calmodulin binding protein-like
Medtr6g007743	-1.12155	0.463753	-2.41842	0.0155879	0.0498092	PF00892(EamA-like transporter family)	AT3G28050	nodulin MtN21 /EamA-like transporter family protein
Medtr4g105750	-1.12179	0.275394	-4.07341	4.63301e-05	0.00034843	PF07816(Protein of unknown function (DUF1645))	AT1G70420	Protein of unknown function (DUF1645)
Medtr7g061830	-1.12292	0.136916	-8.20152	2.37366e-16	1.9163e-14	PF01237(Oxysterol-binding protein )	AT5G02100	Oxysterol-binding family protein
Medtr5g022450	-1.12302	0.124041	-9.05364	1.38281e-19	1.91711e-17	PF06911(Senescence-associated protein)	AT2G17840	Senescence/dehydration-associated protein-related
Medtr2g011210	-1.12395	0.434925	-2.58423	0.00975953	0.0338262	PF00954(S-locus glycoprotein domain), PF07714(Protein tyrosine kinase), PF08276(PAN-like domain), PF01453(D-mannose binding lectin)	AT4G21390	S-locus lectin protein kinase family protein
Medtr7g109200	-1.12445	0.335756	-3.34902	0.000810975	0.00416175	PF03552(Cellulose synthase)	AT1G02730	cellulose synthase-like D5
Medtr6g478020	-1.1246	0.330536	-3.40235	0.000668081	0.00351985	PF00534(Glycosyl transferases group 1), PF01582(TIR domain), PF00931(NB-ARC domain)	AT5G36930	Disease resistance protein (TIR-NBS-LRR class) family
Medtr1g019280	-1.1248	0.203446	-5.52874	3.22535e-08	5.25583e-07	PF03763(Remorin, C-terminal region )	AT1G45207	Remorin family protein
Medtr4g103970	-1.12513	0.454444	-2.47584	0.0132922	0.0436209		AT5G50335
Medtr7g086770	-1.12677	0.222069	-5.07396	3.89622e-07	4.97214e-06
MT4Noble_039344	-1.12694	0.455986	-2.47144	0.013457	0.0440799
MT4Noble_039345	-1.12694	0.455986	-2.47144	0.013457	0.0440799
Medtr4g081750	-1.12752	0.24821	-4.54259	5.55666e-06	5.3799e-05	PF07714(Protein tyrosine kinase), PF00954(S-locus glycoprotein domain), PF08276(PAN-like domain), PF01453(D-mannose binding lectin)	AT1G11300	protein serine/threonine kinases;protein kinases;ATP binding;sugar binding;kinases;carbohydrate binding
Medtr1g492760	-1.12776	0.20142	-5.59904	2.15543e-08	3.65202e-07	PF00730(HhH-GPD superfamily base excision DNA repair protein)	AT5G04560	HhH-GPD base excision DNA repair family protein
Medtr8g005225	-1.12805	0.358583	-3.14585	0.00165605	0.00768257	PF03140(Plant protein of unknown function)	AT2G28580	Plant protein of unknown function (DUF247)
Medtr1g086340	-1.12923	0.156007	-7.23834	4.54219e-13	1.98805e-11	PF03364(Polyketide cyclase / dehydrase and lipid transport)	AT1G02475	Polyketide cyclase/dehydrase and lipid transport superfamily protein
Medtr6g081410	-1.12954	0.313067	-3.60798	0.000308591	0.00181226	PF01554(MatE)	AT5G52450	MATE efflux family protein
Medtr5g009920	-1.1297	0.207173	-5.45294	4.95445e-08	7.73549e-07	PF02891(MIZ/SP-RING zinc finger)	AT5G41580	RING/U-box superfamily protein
Medtr1g061220	-1.13061	0.137516	-8.22166	2.00702e-16	1.66081e-14	PF00730(HhH-GPD superfamily base excision DNA repair protein)	AT2G36490	demeter-like 1
Medtr8g026680	-1.13092	0.263889	-4.28557	1.82271e-05	0.000152787	PF00786(P21-Rho-binding domain), PF00620(RhoGAP domain)	AT2G46710	Rho GTPase activating protein with PAK-box/P21-Rho-binding domain
Medtr3g051770	-1.1315	0.267592	-4.22845	2.35312e-05	0.000191019	PF00036(EF hand), PF00069(Protein kinase domain)	AT3G20410	calmodulin-domain protein kinase 9
Medtr1g105750	-1.13221	0.295377	-3.83309	0.000126544	0.000836881	PF00069(Protein kinase domain), PF01657(Salt stress response/antifungal)	AT4G21410	cysteine-rich RLK (RECEPTOR-like protein kinase) 29
Medtr5g016610	-1.13272	0.255407	-4.43495	9.20928e-06	8.35715e-05	PF10533(Plant zinc cluster domain), PF03106(WRKY DNA -binding domain)	AT4G24240	WRKY DNA-binding protein 7
Medtr4g094925	-1.13274	0.343055	-3.30193	0.000960229	0.00480841	PF01596(O-methyltransferase)	AT4G34050	S-adenosyl-L-methionine-dependent methyltransferases superfamily protein
Medtr4g045810	-1.13306	0.186944	-6.06093	1.35334e-09	2.95087e-08	PF03936(Terpene synthase family, metal binding domain), PF01397(Terpene synthase, N-terminal domain)	AT3G25820	terpene synthase-like sequence-1,8-cineole
Medtr5g018720	-1.13347	0.342445	-3.30994	0.000933162	0.00470042		AT4G37240
Medtr1g015140	-1.13361	0.259563	-4.3674	1.25737e-05	0.000110505	PF03106(WRKY DNA -binding domain)	AT5G26170	WRKY DNA-binding protein 50
Medtr0086s0010	-1.13398	0.212888	-5.32664	1.00048e-07	1.45485e-06	PF02179(BAG domain)	AT5G52060	BCL-2-associated athanogene 1
Medtr6g009720	-1.13424	0.290904	-3.89902	9.65826e-05	0.000661645	PF00004(ATPase family associated with various cellular activities (AAA))	AT3G28510	P-loop containing nucleoside triphosphate hydrolases superfamily protein
Medtr7g007440	-1.13503	0.346099	-3.2795	0.00103989	0.00514795	PF00234(Protease inhibitor/seed storage/LTP family)	AT3G18280	Bifunctional inhibitor/lipid-transfer protein/seed storage 2S albumin superfamily protein
Medtr4g073720	-1.1355	0.421286	-2.69532	0.00703213	0.0257517	PF00314(Thaumatin family)	AT4G38660	Pathogenesis-related thaumatin superfamily protein
Medtr1g115870	-1.13591	0.29435	-3.85905	0.000113827	0.000764429	PF02431(Chalcone-flavanone isomerase)	AT3G55120	Chalcone-flavanone isomerase family protein
Medtr4g087980	-1.13715	0.245381	-4.63423	3.58276e-06	3.64202e-05	PF01095(Pectinesterase), PF04043(Plant invertase/pectin methylesterase inhibitor)	AT3G43270	Plant invertase/pectin methylesterase inhibitor superfamily
Medtr6g016470	-1.13958	0.399822	-2.85023	0.00436882	0.0173964	PF00689(Cation transporting ATPase, C-terminus), PF00702(haloacid dehalogenase-like hydrolase), PF00690(Cation transporter/ATPase, N-terminus), PF00122(E1-E2 ATPase)	AT3G22910	ATPase E1-E2 type family protein / haloacid dehalogenase-like hydrolase family protein
Medtr5g069010	-1.13977	0.333591	-3.41668	0.000633897	0.00336519
Medtr6g083010	-1.14162	0.267372	-4.26976	1.95683e-05	0.000162589		AT1G67000	Protein kinase superfamily protein
Medtr7g110000	-1.14376	0.286202	-3.99634	6.43299e-05	0.000462017	PF00955(HCO3- transporter family)	AT3G62270	HCO3- transporter family
Medtr7g069500	-1.14505	0.115962	-9.87438	5.37667e-23	1.2489e-20	PF02776(Thiamine pyrophosphate enzyme, N-terminal TPP binding domain), PF02775(Thiamine pyrophosphate enzyme, C-terminal TPP binding domain)	AT4G33070	Thiamine pyrophosphate dependent pyruvate decarboxylase family protein
Medtr5g040970	-1.14629	0.180807	-6.33985	2.29993e-10	5.861e-09
Medtr3g048910	-1.147	0.284978	-4.02489	5.70028e-05	0.000416166	PF00560(Leucine Rich Repeat), PF08263(Leucine rich repeat N-terminal domain)	AT3G05660	receptor like protein 33
Medtr1g069235	-1.14703	0.361486	-3.17311	0.00150816	0.00707661	PF02427(Photosystem I reaction centre subunit IV / PsaE)	AT2G20260	photosystem I subunit E-2
Medtr7g116890	-1.14737	0.117312	-9.7805	1.36534e-22	3.06392e-20	PF07777(G-box binding protein MFMR), PF00170(bZIP transcription factor)	AT2G46270	G-box binding factor 3
Medtr1g024840	-1.14991	0.249139	-4.61553	3.92086e-06	3.94021e-05		AT1G75690	DnaJ/Hsp40 cysteine-rich domain superfamily protein
Medtr1g025340	-1.15069	0.212045	-5.42664	5.74257e-08	8.82437e-07	PF11961(Domain of unknown function (DUF3475)), PF05003(Protein of unknown function (DUF668))	AT1G30755	Protein of unknown function (DUF668)
Medtr0036s0070	-1.15131	0.288384	-3.99229	6.5439e-05	0.000468331	PF00026(Eukaryotic aspartyl protease)	AT1G31450	Eukaryotic aspartyl protease family protein
Medtr1g105495	-1.15154	0.461202	-2.49683	0.0125308	0.0414873	PF00722(Glycosyl hydrolases family 16), PF06955(Xyloglucan endo-transglycosylase (XET) C-terminus)	AT1G11545	xyloglucan endotransglucosylase/hydrolase 8
Medtr8g024540	-1.15259	0.252435	-4.56589	4.97375e-06	4.87977e-05	PF00612(IQ calmodulin-binding motif)	AT1G01110	IQ-domain 18
Medtr0036s0010	-1.15297	0.159704	-7.21942	5.22093e-13	2.24797e-11		AT1G79570	Protein kinase superfamily protein with octicosapeptide/Phox/Bem1p domain
Medtr6g033055	-1.15305	0.271506	-4.24686	2.16787e-05	0.00017789	PF00722(Glycosyl hydrolases family 16), PF06955(Xyloglucan endo-transglycosylase (XET) C-terminus)	AT5G13870	xyloglucan endotransglucosylase/hydrolase 5
Medtr6g082480	-1.15361	0.374556	-3.07994	0.00207044	0.00931134		AT3G18280	Bifunctional inhibitor/lipid-transfer protein/seed storage 2S albumin superfamily protein
Medtr6g014187	-1.15427	0.263705	-4.37713	1.2025e-05	0.000106282	PF00201(UDP-glucoronosyl and UDP-glucosyl transferase)	AT1G22380	UDP-glucosyl transferase 85A3
Medtr7g103180	-1.15466	0.240363	-4.80383	1.55661e-06	1.73993e-05	PF00069(Protein kinase domain)	AT5G02070	Protein kinase family protein
Medtr2g028480	-1.15713	0.124712	-9.27843	1.71989e-20	2.74354e-18	PF00759(Glycosyl hydrolase family 9)	AT5G49720	glycosyl hydrolase 9A1
Medtr2g043900	-1.15907	0.400612	-2.89325	0.00381276	0.015523	PF08022(FAD-binding domain), PF08030(Ferric reductase NAD binding domain), PF01794(Ferric reductase like transmembrane component), PF08414(Respiratory burst NADPH oxidase)	AT1G19230	Riboflavin synthase-like superfamily protein
Medtr1g423960	-1.15935	0.43912	-2.64017	0.00828642	0.0295322		AT5G67240	small RNA degrading nuclease 3
Medtr2g038040	-1.15942	0.401268	-2.88938	0.00386005	0.015689	PF00010(Helix-loop-helix DNA-binding domain)	AT5G57150	basic helix-loop-helix (bHLH) DNA-binding superfamily protein
Medtr6g478010	-1.15967	0.43158	-2.68705	0.00720872	0.0262857	PF01582(TIR domain), PF00931(NB-ARC domain)	AT5G18370	Disease resistance protein (TIR-NBS-LRR class) family
Medtr6g080710	-1.16132	0.256804	-4.52221	6.1197e-06	5.83962e-05	PF01412(Putative GTPase activating protein for Arf)	AT3G17660	ARF-GAP domain 15
Medtr1g099550	-1.16225	0.265079	-4.38455	1.16224e-05	0.000103068		AT5G52870
MT4Noble_037207	-1.16456	0.22033	-5.28553	1.25342e-07	1.79215e-06
Medtr2g014550	-1.16472	0.431475	-2.69941	0.00694634	0.0254941	PF05078(Protein of unknown function (DUF679))	AT5G46090	Protein of unknown function (DUF679)
Medtr4g101260	-1.16475	0.425605	-2.73669	0.00620602	0.0232737	PF00234(Protease inhibitor/seed storage/LTP family)	AT2G45180	Bifunctional inhibitor/lipid-transfer protein/seed storage 2S albumin superfamily protein
Medtr3g058880	-1.16484	0.183218	-6.3577	2.048e-10	5.25494e-09	PF00931(NB-ARC domain), PF01582(TIR domain), PF07725(Leucine Rich Repeat)	AT5G17680	disease resistance protein (TIR-NBS-LRR class), putative
Medtr6g074160	-1.16497	0.45586	-2.55555	0.0106019	0.036145		AT3G17740
Medtr3g084090	-1.165	0.1642	-7.09499	1.29363e-12	5.15894e-11	PF01370(NAD dependent epimerase/dehydratase family)	AT3G23820	UDP-D-glucuronate 4-epimerase 6
Medtr7g007560	-1.16531	0.278987	-4.17694	2.95458e-05	0.000234876	PF00069(Protein kinase domain), PF00560(Leucine Rich Repeat)	AT4G08850	Leucine-rich repeat receptor-like protein kinase family protein
Medtr1g043350	-1.1675	0.138757	-8.414	3.96249e-17	3.6946e-15	PF00847(AP2 domain)	AT3G23240	ethylene response factor 1
Medtr4g094240	-1.16771	0.243345	-4.7986	1.5978e-06	1.78146e-05	PF04674(Phosphate-induced protein 1 conserved region)	AT5G64260	EXORDIUM like 2
Medtr4g124960	-1.16816	0.399753	-2.9222	0.00347568	0.014347	PF09425(Divergent CCT motif), PF06200(tify domain)	AT1G19180	jasmonate-zim-domain protein 1
Medtr2g074980	-1.1689	0.247734	-4.71838	2.37736e-06	2.52719e-05	PF07714(Protein tyrosine kinase), PF00560(Leucine Rich Repeat), PF11721(Di-glucose binding within endoplasmic reticulum)	AT3G14840	Leucine-rich repeat transmembrane protein kinase
Medtr2g101980	-1.1702	0.375393	-3.11726	0.00182539	0.00833962		AT3G16070
Medtr4g027040	-1.17038	0.356892	-3.27937	0.00104041	0.00514952		AT1G10170	NF-X-like 1
Medtr8g030620	-1.17046	0.27935	-4.18994	2.79033e-05	0.000223092	PF01553(Acyltransferase)	AT1G01610	glycerol-3-phosphate acyltransferase 4
Medtr6g004200	-1.17241	0.149573	-7.83839	4.5636e-15	2.99861e-13	PF00205(Thiamine pyrophosphate enzyme, central domain), PF02775(Thiamine pyrophosphate enzyme, C-terminal TPP binding domain), PF02776(Thiamine pyrophosphate enzyme, N-terminal TPP binding domain)	AT5G17380	Thiamine pyrophosphate dependent pyruvate decarboxylase family protein
Medtr6g028110	-1.17367	0.249013	-4.71331	2.43729e-06	2.57849e-05	PF00933(Glycosyl hydrolase family 3 N terminal domain), PF01915(Glycosyl hydrolase family 3 C-terminal domain)	AT5G20950	Glycosyl hydrolase family protein
Medtr2g070460	-1.1738	0.282184	-4.1597	3.18672e-05	0.000250994	PF03055(Retinal pigment epithelial membrane protein)	AT3G14440	nine-cis-epoxycarotenoid dioxygenase 3
Medtr8g012585	-1.17432	0.397227	-2.9563	0.00311353	0.0131305	PF00067(Cytochrome P450)	AT3G25180	cytochrome P450, family 82, subfamily G, polypeptide 1
Medtr7g024760	-1.17558	0.204499	-5.74857	9.00012e-09	1.65617e-07	PF00583(Acetyltransferase (GNAT) family)	AT2G32020	Acyl-CoA N-acyltransferases (NAT) superfamily protein
Medtr2g013310	-1.17743	0.486572	-2.41985	0.0155269	0.04965	PF00083(Sugar (and other) transporter)	AT2G20780	Major facilitator superfamily protein
Medtr3g449240	-1.17746	0.452685	-2.60106	0.00929373	0.0325354	PF00560(Leucine Rich Repeat), PF08263(Leucine rich repeat N-terminal domain)	AT3G05650	receptor like protein 32
Medtr7g095410	-1.17803	0.164342	-7.1682	7.59913e-13	3.14345e-11	PF07765(KIP1-like protein)	AT1G03080	kinase interacting (KIP1-like) family protein
Medtr1g107425	-1.17833	0.154507	-7.62635	2.415e-14	1.38418e-12	PF00107(Zinc-binding dehydrogenase), PF08240(Alcohol dehydrogenase GroES-like domain)	AT3G19450	GroES-like zinc-binding alcohol dehydrogenase family protein
Medtr4g019210	-1.17857	0.285524	-4.12773	3.66357e-05	0.000284074	PF10250(GDP-fucose protein O-fucosyltransferase)	AT2G37980	O-fucosyltransferase family protein
Medtr1g075490	-1.18046	0.287893	-4.10033	4.12561e-05	0.000314468
Medtr5g056550	-1.18085	0.118868	-9.93415	2.95687e-23	7.24982e-21	PF12146(Serine aminopeptidase, S33), PF00756(Putative esterase)	AT1G77420	alpha/beta-Hydrolases superfamily protein
Medtr1g085140	-1.18101	0.217978	-5.41803	6.02592e-08	9.1969e-07	PF00190(Cupin)	AT3G62020	germin-like protein 10
Medtr1g094780	-1.18216	0.204379	-5.78415	7.28805e-09	1.36649e-07	PF00221(Aromatic amino acid lyase)	AT2G37040	PHE ammonia lyase 1
Medtr2g079030	-1.18294	0.210573	-5.61771	1.93502e-08	3.31218e-07	PF01554(MatE), PF02298(Plastocyanin-like domain)	AT3G23560	MATE efflux family protein
Medtr4g017820	-1.18472	0.211094	-5.61228	1.99683e-08	3.40915e-07	PF00909(Ammonium Transporter Family)	AT2G38290	ammonium transporter 2
Medtr6g083810	-1.18482	0.372414	-3.18145	0.00146539	0.00690762	PF07887(Calmodulin binding protein-like)	AT1G73805	Calmodulin binding protein-like
Medtr0591s0010	-1.18486	0.331324	-3.57613	0.000348715	0.00201176	PF00891(O-methyltransferase), PF08100(Dimerisation domain)	AT5G54160	O-methyltransferase 1
Medtr7g071440	-1.1861	0.196578	-6.03375	1.60197e-09	3.43762e-08		AT2G38440	SCAR homolog 2
Medtr3g113920	-1.18649	0.426834	-2.77975	0.00544008	0.0209076	PF00810(ER lumen protein retaining receptor)	AT1G75760	ER lumen protein retaining receptor family protein
Medtr0002s0270	-1.18692	0.201682	-5.8851	3.97804e-09	7.86109e-08
Medtr4g094805	-1.18801	0.15152	-7.84065	4.48223e-15	2.95248e-13	PF04095(Nicotinate phosphoribosyltransferase (NAPRTase) family)	AT2G23420	nicotinate phosphoribosyltransferase 2
Medtr0277s0020	-1.19024	0.229323	-5.19021	2.10059e-07	2.85104e-06	PF00931(NB-ARC domain), PF01582(TIR domain), PF00560(Leucine Rich Repeat)	AT5G36930	Disease resistance protein (TIR-NBS-LRR class) family
Medtr6g069560	-1.19083	0.272219	-4.37455	1.21686e-05	0.000107408	PF00931(NB-ARC domain), PF01582(TIR domain)	AT5G36930	Disease resistance protein (TIR-NBS-LRR class) family
Medtr7g099820	-1.19282	0.292474	-4.07837	4.53519e-05	0.000342002	PF00999(Sodium/hydrogen exchanger family)	AT3G53720	cation/H+ exchanger 20
Medtr1g069200	-1.19312	0.260999	-4.57135	4.84595e-06	4.76498e-05	PF00067(Cytochrome P450)	AT5G52400	cytochrome P450, family 715, subfamily A, polypeptide 1
Medtr3g062570	-1.19364	0.304624	-3.91842	8.91317e-05	0.000617802	PF00069(Protein kinase domain), PF00560(Leucine Rich Repeat)	AT1G06840	Leucine-rich repeat protein kinase family protein
Medtr3g094130	-1.19476	0.355759	-3.35833	0.000784149	0.00404288
Medtr6g086340	-1.19491	0.309676	-3.85859	0.000114043	0.000765321	PF00171(Aldehyde dehydrogenase family)	AT3G24503	aldehyde dehydrogenase 2C4
Medtr7g106080	-1.19564	0.345286	-3.46276	0.000534661	0.00290775		AT3G11660	NDR1/HIN1-like 1
MT4Noble_026515	-1.1963	0.196684	-6.08238	1.18413e-09	2.61299e-08
Medtr5g090620	-1.19645	0.267204	-4.47765	7.54684e-06	7.05125e-05	PF00201(UDP-glucoronosyl and UDP-glucosyl transferase)	AT3G21760	UDP-Glycosyltransferase superfamily protein
Medtr1g016070	-1.19647	0.372959	-3.20806	0.00133634	0.0063874	PF00173(Cytochrome b5-like Heme/Steroid binding domain), PF00487(Fatty acid desaturase)	AT3G61580	Fatty acid/sphingolipid desaturase
Medtr4g087925	-1.19757	0.304866	-3.92817	8.55932e-05	0.000596606	PF01094(Receptor family ligand binding region), PF00060(Ligand-gated ion channel), PF00497(Bacterial extracellular solute-binding proteins, family 3)	AT2G29120	glutamate receptor 2.7
Medtr3g107100	-1.19902	0.457171	-2.62269	0.00872396	0.0308055	PF00646(F-box domain), PF08387(FBD)	AT1G78750	F-box/RNI-like superfamily protein
Medtr8g091280	-1.19969	0.133453	-8.98957	2.48199e-19	3.26981e-17	PF00155(Aminotransferase class I and II)	AT2G22250	aspartate aminotransferase
Medtr5g093050	-1.2002	0.263561	-4.55379	5.26889e-06	5.1313e-05
Medtr8g089800	-1.20059	0.437382	-2.74496	0.0060519	0.0227925	PF00067(Cytochrome P450)	AT2G32440	ent-kaurenoic acid hydroxylase 2
Medtr2g098070	-1.20096	0.21721	-5.52901	3.22042e-08	5.25102e-07	PF00153(Mitochondrial carrier protein)	AT5G13490	ADP/ATP carrier 2
Medtr4g072600	-1.20097	0.33409	-3.59475	0.000324698	0.001893	PF02519(Auxin responsive protein)	AT4G38840	SAUR-like auxin-responsive protein family
Medtr1g097910	-1.20288	0.268484	-4.48026	7.45533e-06	6.98115e-05	PF02797(Chalcone and stilbene synthases, C-terminal domain), PF00195(Chalcone and stilbene synthases, N-terminal domain)	AT5G13930	Chalcone and stilbene synthase family protein
Medtr3g035650	-1.20317	0.197557	-6.09023	1.12746e-09	2.50253e-08
Medtr0415s0010	-1.20386	0.350802	-3.43172	0.000599764	0.00320908		AT5G41140	Myosin heavy chain-related protein
Medtr7g108905	-1.20435	0.254551	-4.73125	2.23139e-06	2.39317e-05	PF01095(Pectinesterase), PF04043(Plant invertase/pectin methylesterase inhibitor)	AT4G02320	Plant invertase/pectin methylesterase inhibitor superfamily
Medtr4g016790	-1.20466	0.423055	-2.84753	0.00440596	0.0175233		AT2G25470	receptor like protein 21
Medtr5g095190	-1.20501	0.30157	-3.99578	6.44815e-05	0.000462604
Medtr5g053950	-1.20545	0.165892	-7.26645	3.69063e-13	1.64802e-11	PF06351(Allene oxide cyclase)	AT1G13280	allene oxide cyclase 4
Medtr1g078000	-1.20717	0.244727	-4.93272	8.10923e-07	9.67263e-06	PF00534(Glycosyl transferases group 1), PF08323(Starch synthase catalytic domain)	AT1G32900	UDP-Glycosyltransferase superfamily protein
Medtr8g005530	-1.20827	0.414825	-2.91273	0.00358283	0.0147273	PF03767(HAD superfamily, subfamily IIIB (Acid phosphatase))	AT2G38600	HAD superfamily, subfamily IIIB acid phosphatase
MT4Noble_009772	-1.20844	0.198483	-6.08837	1.1407e-09	2.52767e-08
Medtr6g083320	-1.20948	0.362771	-3.33401	0.000856048	0.00436345	PF07887(Calmodulin binding protein-like)	AT1G73805	Calmodulin binding protein-like
Medtr7g015710	-1.20999	0.226676	-5.33798	9.39904e-08	1.37658e-06		AT1G13680	PLC-like phosphodiesterases superfamily protein
Medtr3g078740	-1.21042	0.428348	-2.82579	0.00471648	0.0185654	PF00394(Multicopper oxidase), PF07732(Multicopper oxidase), PF07731(Multicopper oxidase)	AT5G21105	Plant L-ascorbate oxidase
Medtr2g008430	-1.21053	0.404238	-2.9946	0.00274801	0.0118129	PF00155(Aminotransferase class I and II)	AT2G13810	AGD2-like defense response protein 1
Medtr6g072780	-1.21063	0.256567	-4.71855	2.37526e-06	2.52598e-05	PF01582(TIR domain), PF00931(NB-ARC domain)	AT5G17680	disease resistance protein (TIR-NBS-LRR class), putative
Medtr2g019950	-1.21104	0.465637	-2.60082	0.00930008	0.0325447	PF00462(Glutaredoxin)	AT3G21460	Glutaredoxin family protein
Medtr1g061590	-1.21139	0.436608	-2.77454	0.00552797	0.0211747	PF00069(Protein kinase domain), PF00560(Leucine Rich Repeat), PF08263(Leucine rich repeat N-terminal domain)	AT2G36570	Leucine-rich repeat protein kinase family protein
Medtr3g083470	-1.21167	0.384651	-3.15004	0.00163248	0.00758919	PF00036(EF hand)	AT1G24620	EF hand calcium-binding protein family
Medtr3g035630	-1.21177	0.214083	-5.66029	1.51118e-08	2.65183e-07
Medtr0263s0020	-1.21192	0.189191	-6.40578	1.49598e-10	3.91826e-09	PF00704(Glycosyl hydrolases family 18)
Medtr5g031860	-1.2136	0.228478	-5.31169	1.08613e-07	1.56734e-06	PF00201(UDP-glucoronosyl and UDP-glucosyl transferase)	AT1G22380	UDP-glucosyl transferase 85A3
Medtr8g006600	-1.21596	0.358401	-3.39275	0.00069195	0.00363116	PF03767(HAD superfamily, subfamily IIIB (Acid phosphatase))	AT2G38600	HAD superfamily, subfamily IIIB acid phosphatase
Medtr8g042070	-1.21668	0.415369	-2.92915	0.00339894	0.0140917	PF03140(Plant protein of unknown function)	AT3G50120	Plant protein of unknown function (DUF247)
Medtr4g017850	-1.21911	0.249599	-4.88428	1.03807e-06	1.20667e-05	PF01426(BAH domain), PF00385(Chromo (CHRromatin Organisation MOdifier) domain), PF00145(C-5 cytosine-specific DNA methylase)	AT1G69770	chromomethylase 3
Medtr4g027840	-1.22225	0.382835	-3.19262	0.0014099	0.00669747	PF00234(Protease inhibitor/seed storage/LTP family)	AT2G38540	lipid transfer protein 1
Medtr1g112630	-1.22261	0.264867	-4.61592	3.91362e-06	3.93591e-05	PF00149(Calcineurin-like phosphoesterase)	AT2G16430	purple acid phosphatase 10
Medtr3g110122	-1.22405	0.459942	-2.66132	0.00778347	0.028034	PF03638(Tesmin/TSO1-like CXC domain, cysteine-rich domain)	AT4G29000	Tesmin/TSO1-like CXC domain-containing protein
Medtr3g012440	-1.22507	0.273717	-4.4757	7.61614e-06	7.09375e-05	PF07859(alpha/beta hydrolase fold)	AT5G16080	carboxyesterase 17
Medtr3g085890	-1.22848	0.238871	-5.14285	2.706e-07	3.58454e-06	PF06522(NADH-ubiquinone reductase complex 1 MLRQ subunit)	AT3G48140	B12D protein
Medtr8g028720	-1.22987	0.154306	-7.97034	1.58243e-15	1.12039e-13	PF00069(Protein kinase domain)	AT4G01370	MAP kinase 4
Medtr4g009620	-1.23125	0.470997	-2.61414	0.00894515	0.0314649	PF03140(Plant protein of unknown function)	AT3G02645	Plant protein of unknown function (DUF247)
Medtr7g050425	-1.2327	0.300345	-4.10426	4.05613e-05	0.000309975	PF00300(Histidine phosphatase superfamily (branch 1))	AT3G60450	Phosphoglycerate mutase family protein
Medtr4g014280	-1.23469	0.292832	-4.21638	2.48253e-05	0.000200541	PF01582(TIR domain), PF00560(Leucine Rich Repeat), PF00931(NB-ARC domain), PF05212(Protein of unknown function (DUF707))	AT5G17680	disease resistance protein (TIR-NBS-LRR class), putative
Medtr5g063760	-1.23506	0.509933	-2.42201	0.015435	0.0494099	PF08263(Leucine rich repeat N-terminal domain), PF00560(Leucine Rich Repeat)	AT2G33060	receptor like protein 27
Medtr3g082100	-1.2352	0.249308	-4.95452	7.2509e-07	8.70371e-06	PF00234(Protease inhibitor/seed storage/LTP family)	AT3G22142	Bifunctional inhibitor/lipid-transfer protein/seed storage 2S albumin superfamily protein
Medtr5g094820	-1.23608	0.437026	-2.82839	0.00467826	0.0184373	PF08263(Leucine rich repeat N-terminal domain), PF00560(Leucine Rich Repeat), PF00005(ABC transporter)	AT3G13080	multidrug resistance-associated protein 3
Medtr5g092190	-1.23677	0.372488	-3.32029	0.000899231	0.00455115	PF01582(TIR domain), PF00931(NB-ARC domain)	AT4G27190	NB-ARC domain-containing disease resistance protein
Medtr3g104750	-1.2371	0.268313	-4.61065	4.01412e-06	4.02019e-05	PF03106(WRKY DNA -binding domain)	AT5G26170	WRKY DNA-binding protein 50
Medtr5g031300	-1.23715	0.348178	-3.5532	0.00038057	0.00217188	PF08240(Alcohol dehydrogenase GroES-like domain), PF00107(Zinc-binding dehydrogenase)	AT4G37980	elicitor-activated gene 3-1
Medtr7g071110	-1.23932	0.34173	-3.62659	0.000287188	0.0017051	PF04535(Domain of unknown function (DUF588))	AT2G38480	Uncharacterised protein family (UPF0497)
Medtr7g016720	-1.24067	0.360156	-3.4448	0.000571476	0.00307762	PF02797(Chalcone and stilbene synthases, C-terminal domain), PF00195(Chalcone and stilbene synthases, N-terminal domain)	AT5G13930	Chalcone and stilbene synthase family protein
Medtr3g031040	-1.24149	0.390837	-3.17651	0.0014906	0.00700962	PF02518(Histidine kinase-, DNA gyrase B-, and HSP90-like ATPase), PF00204(DNA gyrase B), PF00521(DNA gyrase/topoisomerase IV, subunit A)	AT3G23890	topoisomerase II
Medtr7g089905	-1.24212	0.30586	-4.06108	4.88467e-05	0.000364663	PF01490(Transmembrane amino acid transporter protein)	AT2G41190	Transmembrane amino acid transporter family protein
Medtr2g438440	-1.24399	0.344098	-3.61521	0.000300099	0.00177182		AT3G54070	Ankyrin repeat family protein
Medtr1g054175	-1.24711	0.176911	-7.04935	1.79757e-12	6.93871e-11	PF08879(WRC)	AT2G42040
MT4Noble_054828	-1.24736	0.226861	-5.49833	3.83414e-08	6.11619e-07
Medtr6g007070	-1.24925	0.225659	-5.536	3.09452e-08	5.07073e-07	PF02910(Fumarate reductase flavoprotein C-term), PF00890(FAD binding domain)	AT5G14760	L-aspartate oxidase
Medtr7g065660	-1.25047	0.21973	-5.69094	1.26344e-08	2.25292e-07	PF00043(Glutathione S-transferase, C-terminal domain), PF02798(Glutathione S-transferase, N-terminal domain)	AT3G09270	glutathione S-transferase TAU 8
Medtr8g099030	-1.25078	0.167239	-7.47903	7.48741e-14	3.94953e-12	PF08414(Respiratory burst NADPH oxidase), PF01794(Ferric reductase like transmembrane component), PF08022(FAD-binding domain)	AT1G64060	respiratory burst oxidase protein F
Medtr6g034870	-1.25155	0.159385	-7.85234	4.08348e-15	2.70326e-13	PF04554(Extensin-like region)
Medtr8g005410	-1.25237	0.420318	-2.97959	0.00288635	0.0123127	PF03767(HAD superfamily, subfamily IIIB (Acid phosphatase))	AT2G38600	HAD superfamily, subfamily IIIB acid phosphatase
Medtr4g095002	-1.2524	0.348676	-3.59187	0.000328313	0.00191113		AT2G23270
Medtr7g101070	-1.25248	0.173887	-7.2028	5.89866e-13	2.50717e-11	PF00226(DnaJ domain)	AT5G03160	homolog of mamallian P58IPK
Medtr2g097473	-1.25327	0.516556	-2.42621	0.0152574	0.0489657	PF03514(GRAS domain family)	AT1G07530	SCARECROW-like 14
Medtr7g104250	-1.25395	0.398664	-3.14539	0.00165865	0.00769138	PF01476(LysM domain)	AT3G52790	peptidoglycan-binding LysM domain-containing protein
Medtr2g011180	-1.25448	0.400185	-3.13474	0.00172008	0.00793239	PF00954(S-locus glycoprotein domain), PF00069(Protein kinase domain), PF08276(PAN-like domain), PF12398(Receptor serine/threonine kinase ), PF01453(D-mannose binding lectin)	AT4G21380	receptor kinase 3
Medtr1g097440	-1.25448	0.372636	-3.36649	0.000761303	0.00394584	PF00076(RNA recognition motif. (a.k.a. RRM, RBD, or RNP domain)), PF00658(Poly-adenylate binding protein, unique domain)	AT1G22760	poly(A) binding protein 3
Medtr7g114130	-1.25465	0.368617	-3.40367	0.000664868	0.00350571	PF00168(C2 domain), PF07002(Copine)	AT1G08860	Calcium-dependent phospholipid-binding Copine family protein
Medtr2g460800	-1.25571	0.236873	-5.30118	1.15056e-07	1.65311e-06	PF02453(Reticulon)	AT5G58000	Reticulon family protein
Medtr1g022370	-1.26221	0.337917	-3.73525	0.000187528	0.00117338	PF01167(Tub family), PF00646(F-box domain)	AT1G47270	tubby like protein 6
Medtr4g035870	-1.26248	0.390001	-3.23713	0.00120739	0.00585561	PF04043(Plant invertase/pectin methylesterase inhibitor)	AT5G62360	Plant invertase/pectin methylesterase inhibitor superfamily protein
Medtr2g039620	-1.26473	0.344247	-3.67391	0.000238868	0.00145174	PF00010(Helix-loop-helix DNA-binding domain)	AT5G56960	basic helix-loop-helix (bHLH) DNA-binding family protein
Medtr8g006575	-1.26543	0.35058	-3.60953	0.000306748	0.00180344	PF03767(HAD superfamily, subfamily IIIB (Acid phosphatase))	AT2G38600	HAD superfamily, subfamily IIIB acid phosphatase
Medtr3g021090	-1.26654	0.352788	-3.59009	0.000330564	0.00192208	PF03005()	AT1G29050	TRICHOME BIREFRINGENCE-LIKE 38
Medtr8g016070	-1.2666	0.408705	-3.09906	0.00194136	0.00880561	PF00005(ABC transporter), PF00664(ABC transporter transmembrane region)	AT3G21250	multidrug resistance-associated protein 6
Medtr5g064500	-1.26773	0.128311	-9.88008	5.0792e-23	1.19024e-20	PF01474(Class-II DAHP synthetase family)	AT1G22410	Class-II DAHP synthetase family protein
Medtr4g006040	-1.26793	0.194537	-6.51767	7.14087e-11	2.00946e-09
Medtr4g018880	-1.26913	0.321897	-3.94266	8.05825e-05	0.000565252	PF06521(PAR1 protein)	AT3G54040	PAR1 protein
Medtr4g076255	-1.2693	0.174741	-7.2639	3.7608e-13	1.67372e-11	PF00332(Glycosyl hydrolases family 17)	AT4G16260	Glycosyl hydrolase superfamily protein
Medtr8g086600	-1.27061	0.345016	-3.68275	0.000230731	0.0014081	PF03552(Cellulose synthase)	AT4G18780	cellulose synthase family protein
Medtr3g071980	-1.27137	0.234189	-5.42882	5.67279e-08	8.73854e-07	PF02153(Prephenate dehydrogenase)	AT5G34930	arogenate dehydrogenase
Medtr3g035635	-1.27162	0.198167	-6.41691	1.39064e-10	3.6714e-09
MT4Noble_034366	-1.27178	0.256124	-4.96548	6.85321e-07	8.26756e-06
Medtr3g079210	-1.2725	0.189597	-6.71161	1.92489e-11	5.94763e-10	PF00234(Protease inhibitor/seed storage/LTP family)	AT3G43720	Bifunctional inhibitor/lipid-transfer protein/seed storage 2S albumin superfamily protein
Medtr1g017170	-1.27295	0.155044	-8.21027	2.20693e-16	1.78714e-14	PF02714(Calcium-dependent channel, 7TM region, putative phosphate)	AT1G58520	lipases;hydrolases, acting on ester bonds
Medtr3g083810	-1.27457	0.36386	-3.5029	0.000460219	0.00255538	PF00149(Calcineurin-like phosphoesterase)	AT3G07130	purple acid phosphatase 15
Medtr8g016370	-1.27466	0.433381	-2.94121	0.00326937	0.0136708	PF03168(Late embryogenesis abundant protein)	AT1G17620	Late embryogenesis abundant (LEA) hydroxyproline-rich glycoprotein family
Medtr3g092900	-1.27519	0.157741	-8.08407	6.26421e-16	4.78323e-14	PF08100(Dimerisation domain), PF00891(O-methyltransferase)	AT5G54160	O-methyltransferase 1
Medtr2g008390	-1.27641	0.118357	-10.7844	4.07856e-27	1.71429e-24	PF08263(Leucine rich repeat N-terminal domain), PF07714(Protein tyrosine kinase), PF00560(Leucine Rich Repeat)	AT4G33430	BRI1-associated receptor kinase
Medtr1g040360	-1.27875	0.360424	-3.54791	0.000388296	0.00220645		AT3G01680
Medtr4g011790	-1.27949	0.148802	-8.59861	8.06897e-18	8.44531e-16	PF00501(AMP-binding enzyme)	AT3G16170	AMP-dependent synthetase and ligase family protein
Medtr3g014608	-1.28012	0.177464	-7.21341	5.4568e-13	2.34192e-11
Medtr7g080370	-1.28315	0.183342	-6.99868	2.58378e-12	9.66363e-11	PF00262(Calreticulin family)	AT1G08450	calreticulin 3
Medtr2g100210	-1.28385	0.296894	-4.32426	1.53045e-05	0.000131408	PF00223(Photosystem I psaA/psaB protein)	ATCG00340	Photosystem I, PsaA/PsaB protein
Medtr7g093213	-1.285	0.23758	-5.40871	6.34792e-08	9.64388e-07
Medtr3g110630	-1.28501	0.342194	-3.75522	0.000173191	0.00109323	PF06219(Protein of unknown function (DUF1005))	AT1G10020	Protein of unknown function (DUF1005)
Medtr3g105650	-1.28622	0.496445	-2.59087	0.00957337	0.0333206		AT4G10720	Ankyrin repeat family protein
Medtr6g074090	-1.28657	0.387583	-3.31947	0.000901893	0.00456288	PF01582(TIR domain), PF00931(NB-ARC domain)	AT5G17680	disease resistance protein (TIR-NBS-LRR class), putative
Medtr8g010000	-1.28671	0.218063	-5.90061	3.62153e-09	7.23214e-08	PF00107(Zinc-binding dehydrogenase)	AT5G16970	alkenal reductase
Medtr8g005420	-1.28806	0.35345	-3.64424	0.000268181	0.00160666	PF03767(HAD superfamily, subfamily IIIB (Acid phosphatase))	AT2G38600	HAD superfamily, subfamily IIIB acid phosphatase
Medtr1g062630	-1.28824	0.457817	-2.81388	0.0048948	0.0191454	PF00314(Thaumatin family)	AT1G20030	Pathogenesis-related thaumatin superfamily protein
Medtr3g061630	-1.28872	0.20699	-6.22602	4.78441e-10	1.1332e-08	PF02341(RbcX protein)	AT5G19855	Chaperonin-like RbcX protein
Medtr2g438470	-1.28927	0.273629	-4.71172	2.45629e-06	2.59651e-05		AT3G54070	Ankyrin repeat family protein
Medtr3g062220	-1.28946	0.352116	-3.66204	0.000250213	0.0015127	PF00931(NB-ARC domain)	AT4G27220	NB-ARC domain-containing disease resistance protein
Medtr1g015165	-1.28981	0.381943	-3.37697	0.000732895	0.00381954	PF00011(Hsp20/alpha crystallin family)	AT5G12020	17.6 kDa class II heat shock protein
Medtr4g129630	-1.29124	0.153515	-8.41116	4.05983e-17	3.77208e-15	PF12076(WAX2 C-terminal domain), PF04116(Fatty acid hydroxylase superfamily)	AT5G57800	Fatty acid hydroxylase superfamily
Medtr8g006690	-1.29297	0.368383	-3.50984	0.000448377	0.00249486	PF03767(HAD superfamily, subfamily IIIB (Acid phosphatase))	AT2G38600	HAD superfamily, subfamily IIIB acid phosphatase
Medtr5g007717	-1.29325	0.204242	-6.33195	2.42081e-10	6.11086e-09	PF02797(Chalcone and stilbene synthases, C-terminal domain), PF00195(Chalcone and stilbene synthases, N-terminal domain)	AT5G13930	Chalcone and stilbene synthase family protein
Medtr8g067490	-1.29398	0.237945	-5.43814	5.38397e-08	8.31298e-07	PF00092(von Willebrand factor type A domain), PF00097(Zinc finger, C3HC4 type (RING finger))	AT2G22680	Zinc finger (C3HC4-type RING finger) family protein
Medtr1g060590	-1.29728	0.209267	-6.1992	5.67525e-10	1.32757e-08		AT3G52870	IQ calmodulin-binding motif family protein
Medtr2g078260	-1.29748	0.360876	-3.59537	0.000323932	0.00188936	PF00560(Leucine Rich Repeat), PF08263(Leucine rich repeat N-terminal domain)	AT1G47890	receptor like protein 7
Medtr4g027800	-1.29841	0.352888	-3.67938	0.000233799	0.00142387	PF00234(Protease inhibitor/seed storage/LTP family)	AT5G59310	lipid transfer protein 4
Medtr2g015850	-1.30025	0.245203	-5.30276	1.14063e-07	1.63973e-06	PF08246(Cathepsin propeptide inhibitor domain (I29)), PF00112(Papain family cysteine protease)	AT2G34080	Cysteine proteinases superfamily protein
Medtr1g090060	-1.30082	0.195651	-6.64869	2.95713e-11	8.86804e-10	PF02798(Glutathione S-transferase, N-terminal domain), PF00043(Glutathione S-transferase, C-terminal domain)	AT3G09270	glutathione S-transferase TAU 8
Medtr4g088385	-1.30084	0.416838	-3.12074	0.00180395	0.00825572		AT2G33850
Medtr3g111600	-1.30102	0.4088	-3.18254	0.00145988	0.00689206	PF01501(Glycosyl transferase family 8)	AT3G50760	galacturonosyltransferase-like 2
Medtr3g062020	-1.30133	0.279095	-4.66267	3.1214e-06	3.21614e-05	PF00931(NB-ARC domain)	AT5G63020	Disease resistance protein (CC-NBS-LRR class) family
Medtr7g109340	-1.30278	0.170191	-7.6548	1.93613e-14	1.12927e-12	PF00226(DnaJ domain), PF01556(DnaJ C terminal domain)	AT3G62600	DNAJ heat shock family protein
Medtr0002s0040	-1.30343	0.18893	-6.89903	5.23599e-12	1.85112e-10	PF00704(Glycosyl hydrolases family 18)
Medtr5g015670	-1.30511	0.378954	-3.44399	0.000573202	0.00308504	PF00134(Cyclin, N-terminal domain), PF02984(Cyclin, C-terminal domain)	AT4G37630	cyclin d5;1
Medtr7g099200	-1.3061	0.388597	-3.36107	0.000776416	0.00401239	PF05899(Protein of unknown function (DUF861))	AT3G04300	RmlC-like cupins superfamily protein
Medtr4g051270	-1.30616	0.192562	-6.78309	1.17636e-11	3.8174e-10	PF02788(Ribulose bisphosphate carboxylase large chain, N-terminal domain), PF00016(Ribulose bisphosphate carboxylase large chain, catalytic domain)	ATCG00490	ribulose-bisphosphate carboxylases
Medtr1g090937	-1.3078	0.399309	-3.27515	0.00105605	0.00521285	PF00139(Legume lectin domain)	AT5G65600	Concanavalin A-like lectin protein kinase family protein
Medtr5g071860	-1.30799	0.426615	-3.06598	0.00216959	0.0096865	PF02705(K+ potassium transporter)	AT2G30070	potassium transporter 1
Medtr7g015970	-1.30832	0.212647	-6.15252	7.62623e-10	1.74239e-08	PF03214(Reversibly glycosylated polypeptide)	AT5G15650	reversibly glycosylated polypeptide 2
Medtr4g133450	-1.30909	0.438824	-2.98316	0.00285285	0.0121844	PF05701(Weak chloroplast movement under blue light)	AT1G12150	Plant protein of unknown function (DUF827)
Medtr8g045735	-1.30943	0.299707	-4.36903	1.24802e-05	0.000109829	PF00407(Pathogenesis-related protein Bet v I family)	AT5G28010	Polyketide cyclase/dehydrase and lipid transport superfamily protein
Medtr8g040640	-1.31458	0.34553	-3.80454	0.000142069	0.000922483		AT3G12320
Medtr3g053710	-1.31476	0.180218	-7.29542	2.97728e-13	1.35229e-11	PF00026(Eukaryotic aspartyl protease)	AT5G10770	Eukaryotic aspartyl protease family protein
Medtr1g017950	-1.31532	0.268757	-4.89409	9.87611e-07	1.15461e-05	PF00412(LIM domain)	AT1G10200	GATA type zinc finger transcription factor family protein
Medtr3g435460	-1.31573	0.215445	-6.10705	1.01492e-09	2.26412e-08	PF00504(Chlorophyll A-B binding protein)	AT3G47470	light-harvesting chlorophyll-protein complex I subunit A4
Medtr1g040215	-1.31582	0.236781	-5.55713	2.74241e-08	4.54437e-07	PF02458(Transferase family)	AT5G17540	HXXXD-type acyl-transferase family protein
Medtr5g025270	-1.31584	0.159477	-8.25096	1.57131e-16	1.32511e-14	PF03055(Retinal pigment epithelial membrane protein)	AT4G19170	nine-cis-epoxycarotenoid dioxygenase 4
Medtr4g050910	-1.31637	0.401449	-3.27904	0.00104162	0.00515193	PF00931(NB-ARC domain), PF01582(TIR domain)	AT5G17680	disease resistance protein (TIR-NBS-LRR class), putative
Medtr3g081170	-1.31675	0.169327	-7.77635	7.46442e-15	4.73999e-13	PF00012(Hsp70 protein)	AT4G16660	heat shock protein 70 (Hsp 70) family protein
Medtr6g007110	-1.31843	0.300055	-4.39394	1.11315e-05	9.913e-05	PF00515(Tetratricopeptide repeat)	AT3G27960	Tetratricopeptide repeat (TPR)-like superfamily protein
MT4Noble_054823	-1.31865	0.204595	-6.44516	1.15479e-10	3.1203e-09
Medtr7g024950	-1.31933	0.438991	-3.00537	0.00265256	0.011464	PF07649(C1-like domain), PF03107(C1 domain)	AT2G16050	Cysteine/Histidine-rich C1 domain family protein
Medtr5g091310	-1.3215	0.295602	-4.47055	7.80184e-06	7.24379e-05		AT1G06475
Medtr5g097910	-1.32154	0.213214	-6.19819	5.71171e-10	1.33492e-08	PF00248(Aldo/keto reductase family)	AT1G59960	NAD(P)-linked oxidoreductase superfamily protein
Medtr3g117500	-1.32276	0.264797	-4.99539	5.87185e-07	7.19845e-06	PF00759(Glycosyl hydrolase family 9)	AT4G39010	glycosyl hydrolase 9B18
Medtr4g122710	-1.32297	0.398641	-3.3187	0.00090439	0.00457329		AT1G02380
Medtr2g017960	-1.32311	0.39052	-3.38808	0.000703832	0.00368913	PF02469(Fasciclin domain)	AT5G60490	FASCICLIN-like arabinogalactan-protein 12
Medtr7g016800	-1.32333	0.30437	-4.34778	1.37525e-05	0.000119517	PF02797(Chalcone and stilbene synthases, C-terminal domain), PF00195(Chalcone and stilbene synthases, N-terminal domain)	AT5G13930	Chalcone and stilbene synthase family protein
MT4Noble_021938	-1.32417	0.205849	-6.43272	1.25339e-10	3.37638e-09
Medtr4g102840	-1.32468	0.478894	-2.76612	0.0056728	0.0216044	PF00612(IQ calmodulin-binding motif)	AT4G23060	IQ-domain 22
Medtr1g088845	-1.32721	0.28111	-4.72132	2.34324e-06	2.49795e-05	PF00043(Glutathione S-transferase, C-terminal domain), PF02798(Glutathione S-transferase, N-terminal domain)	AT1G02920	glutathione S-transferase 7
Medtr3g086980	-1.32746	0.197204	-6.73141	1.68028e-11	5.25312e-10	PF00071(Ras family)	AT5G65270	RAB GTPase homolog A4A
Medtr7g092710	-1.32903	0.449778	-2.95486	0.0031281	0.0131793	PF03208(PRA1 family protein)	AT1G55190	PRA1 (Prenylated rab acceptor) family protein
Medtr2g027130	-1.32943	0.409554	-3.24604	0.00117023	0.00569939	PF05701(Weak chloroplast movement under blue light)	AT1G12150	Plant protein of unknown function (DUF827)
Medtr4g113070	-1.33013	0.384785	-3.4568	0.000546621	0.00296184	PF00005(ABC transporter), PF01061(ABC-2 type transporter), PF08370(Plant PDR ABC transporter associated)	AT2G26910	pleiotropic drug resistance 4
Medtr6g033280	-1.33036	0.279854	-4.75374	1.99684e-06	2.16352e-05	PF00153(Mitochondrial carrier protein)	AT5G14040	phosphate transporter 3;1
Medtr7g114250	-1.33047	0.469141	-2.83597	0.00456863	0.0180644	PF00999(Sodium/hydrogen exchanger family)	AT3G05030	sodium hydrogen exchanger 2
Medtr8g017580	-1.3308	0.301989	-4.40679	1.04916e-05	9.40159e-05		AT4G33050	calmodulin-binding family protein
Medtr2g079500	-1.33283	0.242245	-5.50201	3.75496e-08	6.01521e-07	PF03094(Mlo family)	AT5G53760	Seven transmembrane MLO family protein
Medtr1g040195	-1.33323	0.198336	-6.72208	1.79143e-11	5.58084e-10	PF02458(Transferase family)	AT5G17540	HXXXD-type acyl-transferase family protein
MT4Noble_054824	-1.33392	0.205166	-6.50167	7.94328e-11	2.22446e-09
Medtr5g089320	-1.33482	0.347188	-3.84467	0.000120715	0.000803004	PF00069(Protein kinase domain), PF00036(EF hand)	AT5G12180	calcium-dependent protein kinase 17
Medtr5g029620	-1.33484	0.319334	-4.18008	2.9141e-05	0.000232006		AT2G35470
Medtr1g098140	-1.33646	0.281252	-4.75181	2.01607e-06	2.18168e-05	PF02797(Chalcone and stilbene synthases, C-terminal domain), PF00195(Chalcone and stilbene synthases, N-terminal domain)	AT5G13930	Chalcone and stilbene synthase family protein
Medtr7g089920	-1.33868	0.307571	-4.35244	1.34633e-05	0.000117272	PF01490(Transmembrane amino acid transporter protein)	AT2G41190	Transmembrane amino acid transporter family protein
Medtr8g099410	-1.33915	0.322272	-4.15534	3.2481e-05	0.00025507	PF00759(Glycosyl hydrolase family 9)	AT1G64390	glycosyl hydrolase 9C2
Medtr1g018440	-1.33985	0.291865	-4.59065	4.41876e-06	4.38728e-05	PF04484(Family of unknown function (DUF566) )	AT1G49890	Family of unknown function (DUF566)
Medtr0041s0130	-1.34044	0.289423	-4.63143	3.63148e-06	3.68435e-05	PF02359(Cell division protein 48 (CDC48), N-terminal domain)	AT5G03340	ATPase, AAA-type, CDC48 protein
Medtr7g021770	-1.34189	0.256638	-5.22872	1.70692e-07	2.36769e-06	PF00016(Ribulose bisphosphate carboxylase large chain, catalytic domain), PF02788(Ribulose bisphosphate carboxylase large chain, N-terminal domain)	ATCG00490	ribulose-bisphosphate carboxylases
Medtr6g088445	-1.3429	0.365254	-3.67662	0.000236341	0.00143737	PF10604(Polyketide cyclase / dehydrase and lipid transport)	AT2G25770	Polyketide cyclase/dehydrase and lipid transport superfamily protein
Medtr3g026400	-1.34432	0.333375	-4.03244	5.51999e-05	0.000405463	PF00232(Glycosyl hydrolase family 1)	AT2G44480	beta glucosidase 17
Medtr4g059390	-1.34667	0.293216	-4.59275	4.37453e-06	4.34663e-05	PF00230(Major intrinsic protein)	AT2G37170	plasma membrane intrinsic protein 2
Medtr7g080230	-1.34784	0.184853	-7.29139	3.06776e-13	1.38625e-11	PF00026(Eukaryotic aspartyl protease)	AT1G05840	Eukaryotic aspartyl protease family protein
Medtr1g029810	-1.34935	0.245284	-5.50117	3.77286e-08	6.03658e-07	PF00026(Eukaryotic aspartyl protease)	AT1G44130	Eukaryotic aspartyl protease family protein
Medtr6g016480	-1.35007	0.518309	-2.60477	0.00919372	0.0322365		AT2G24762	glutamine dumper 4
Medtr5g091950	-1.35068	0.187305	-7.21113	5.54885e-13	2.37756e-11	PF00560(Leucine Rich Repeat), PF07714(Protein tyrosine kinase), PF11721(Di-glucose binding within endoplasmic reticulum)	AT1G07650	Leucine-rich repeat transmembrane protein kinase
Medtr8g098360	-1.35088	0.25908	-5.21416	1.8465e-07	2.54266e-06	PF00091(Tubulin/FtsZ family, GTPase domain), PF03953(Tubulin C-terminal domain)	AT5G12250	beta-6 tubulin
Medtr2g096530	-1.35128	0.215173	-6.27998	3.3861e-10	8.29455e-09	PF02065(Melibiase)	AT3G26380	Melibiase family protein
Medtr4g056430	-1.35143	0.256833	-5.26189	1.42584e-07	2.01045e-06	PF02170(PAZ domain), PF02171(Piwi domain), PF08699(Argonaute linker 1 domain)	AT2G27880	Argonaute family protein
Medtr2g088080	-1.35173	0.259389	-5.21118	1.87638e-07	2.57844e-06	PF07731(Multicopper oxidase), PF07732(Multicopper oxidase), PF00394(Multicopper oxidase)	AT1G76160	SKU5 similar 5
Medtr8g099795	-1.35238	0.178508	-7.57601	3.56333e-14	1.96988e-12	PF00012(Hsp70 protein)	AT5G42020	Heat shock protein 70 (Hsp 70) family protein
Medtr5g086690	-1.35378	0.480625	-2.81671	0.00485176	0.0189967	PF01582(TIR domain), PF00931(NB-ARC domain)	AT5G17680	disease resistance protein (TIR-NBS-LRR class), putative
Medtr7g117930	-1.35447	0.19418	-6.97535	3.05108e-12	1.12212e-10	PF02788(Ribulose bisphosphate carboxylase large chain, N-terminal domain), PF00016(Ribulose bisphosphate carboxylase large chain, catalytic domain)	ATCG00490	ribulose-bisphosphate carboxylases
Medtr6g015995	-1.35566	0.384356	-3.5271	0.000420131	0.00236804	PF01190(Pollen proteins Ole e I like)	AT5G15780	Pollen Ole e 1 allergen and extensin family protein
Medtr7g100880	-1.35816	0.233331	-5.82072	5.85943e-09	1.12128e-07	PF04689(DNA binding protein S1FA)	AT2G37120	S1FA-like DNA-binding protein
Medtr5g080940	-1.3599	0.393745	-3.45376	0.000552824	0.00299239	PF10695()
Medtr6g057750	-1.36011	0.220383	-6.17155	6.76219e-10	1.5625e-08	PF01657(Salt stress response/antifungal), PF00069(Protein kinase domain)	AT4G05200	cysteine-rich RLK (RECEPTOR-like protein kinase) 25
Medtr5g056510	-1.3603	0.243044	-5.59693	2.18183e-08	3.69169e-07	PF08392(FAE1/Type III polyketide synthase-like protein), PF08541(3-Oxoacyl-[acyl-carrier-protein (ACP)] synthase III C terminal )	AT1G68530	3-ketoacyl-CoA synthase 6
Medtr4g094958	-1.36047	0.215125	-6.3241	2.54711e-10	6.41136e-09	PF00069(Protein kinase domain), PF00560(Leucine Rich Repeat), PF08263(Leucine rich repeat N-terminal domain)	AT4G37250	Leucine-rich repeat protein kinase family protein
Medtr5g097900	-1.36122	0.221436	-6.14723	7.88467e-10	1.79524e-08	PF00248(Aldo/keto reductase family)	AT1G59960	NAD(P)-linked oxidoreductase superfamily protein
Medtr3g096910	-1.36149	0.31007	-4.39091	1.12879e-05	0.000100337	PF01301(Glycosyl hydrolases family 35)	AT5G63800	Glycosyl hydrolase family 35 protein
MT4Noble_003209	-1.36161	0.320874	-4.24344	2.20115e-05	0.000180174
Medtr4g029090	-1.36399	0.170275	-8.01052	1.14223e-15	8.40175e-14	PF05701(Weak chloroplast movement under blue light)	AT2G38370	Plant protein of unknown function (DUF827)
Medtr6g091635	-1.36529	0.56413	-2.42017	0.0155133	0.0496187
Medtr1g100623	-1.36547	0.209391	-6.52115	6.97697e-11	1.96543e-09		AT5G52300	CAP160 protein
Medtr2g013070	-1.3668	0.466666	-2.92885	0.00340217	0.0141029	PF00487(Fatty acid desaturase), PF08557(Sphingolipid Delta4-desaturase (DES))	AT4G04930	fatty acid desaturase family protein
Medtr1g090920	-1.36743	0.253629	-5.39144	6.9896e-08	1.05281e-06	PF09258(Glycosyl transferase family 64 domain)	AT5G04500	glycosyltransferase family protein 47
Medtr3g083370	-1.36756	0.198694	-6.88274	5.87131e-12	2.04838e-10	PF03171(2OG-Fe(II) oxygenase superfamily)	AT1G05010	ethylene-forming enzyme
Medtr6g055010	-1.36913	0.284733	-4.80848	1.52085e-06	1.705e-05	PF02788(Ribulose bisphosphate carboxylase large chain, N-terminal domain), PF00016(Ribulose bisphosphate carboxylase large chain, catalytic domain)	ATCG00490	ribulose-bisphosphate carboxylases
Medtr7g117690	-1.37037	0.30048	-4.56058	5.10127e-06	4.99441e-05	PF00847(AP2 domain)	AT1G01250	Integrase-type DNA-binding superfamily protein
Medtr1g058120	-1.37261	0.340233	-4.03431	5.47627e-05	0.000402922		AT5G06270
Medtr1g011800	-1.37563	0.287509	-4.78465	1.71289e-06	1.89621e-05	PF04862(Protein of unknown function (DUF642))	AT5G11420	Protein of unknown function, DUF642
Medtr5g087510	-1.37613	0.445099	-3.09174	0.00198987	0.00899025
Medtr7g072560	-1.37626	0.2494	-5.51829	3.42317e-08	5.55039e-07	PF03489(Saposin-like type B, region 2), PF05184(Saposin-like type B, region 1)	AT3G51730	saposin B domain-containing protein
Medtr2g102670	-1.37799	0.149322	-9.22833	2.74894e-20	4.28188e-18	PF01061(ABC-2 type transporter), PF00005(ABC transporter), PF08370(Plant PDR ABC transporter associated)	AT1G15520	pleiotropic drug resistance 12
MT4Noble_054825	-1.38078	0.20885	-6.61132	3.80901e-11	1.12319e-09
Medtr5g097940	-1.38082	0.195351	-7.06842	1.56711e-12	6.12956e-11	PF00248(Aldo/keto reductase family)	AT1G59960	NAD(P)-linked oxidoreductase superfamily protein
Medtr7g021850	-1.38559	0.183501	-7.5509	4.32268e-14	2.35577e-12	PF00248(Aldo/keto reductase family)	AT1G60730	NAD(P)-linked oxidoreductase superfamily protein
Medtr6g463700	-1.38675	0.201119	-6.89515	5.38093e-12	1.8973e-10	PF00069(Protein kinase domain), PF01657(Salt stress response/antifungal)	AT4G05200	cysteine-rich RLK (RECEPTOR-like protein kinase) 25
Medtr7g078150	-1.38739	0.180401	-7.69059	1.46456e-14	8.79401e-13	PF00097(Zinc finger, C3HC4 type (RING finger))	AT3G61460	brassinosteroid-responsive RING-H2
MT4Noble_013918	-1.38782	0.241133	-5.7554	8.64349e-09	1.59498e-07
Medtr3g077630	-1.38788	0.302583	-4.58679	4.50122e-06	4.46079e-05		AT5G62960
Medtr0003s0090	-1.38823	0.394238	-3.52129	0.000429449	0.00240705	PF01582(TIR domain), PF00931(NB-ARC domain)	AT5G36930	Disease resistance protein (TIR-NBS-LRR class) family
Medtr8g092890	-1.38879	0.276745	-5.01832	5.21254e-07	6.47412e-06	PF00400(WD domain, G-beta repeat)	AT1G48870	Transducin/WD40 repeat-like superfamily protein
Medtr4g072880	-1.3893	0.361324	-3.84504	0.000120534	0.000802146	PF02519(Auxin responsive protein)	AT4G38840	SAUR-like auxin-responsive protein family
Medtr8g072000	-1.39054	0.150845	-9.21836	3.01672e-20	4.6715e-18	PF03283(Pectinacetylesterase)	AT4G19420	Pectinacetylesterase family protein
Medtr4g016800	-1.39101	0.359175	-3.87278	0.000107601	0.000727225	PF00560(Leucine Rich Repeat)	AT1G74190	receptor like protein 15
Medtr7g109390	-1.39222	0.403076	-3.45399	0.000552367	0.00299053	PF00933(Glycosyl hydrolase family 3 N terminal domain), PF01915(Glycosyl hydrolase family 3 C-terminal domain)	AT1G02640	beta-xylosidase 2
Medtr3g097260	-1.39391	0.21699	-6.42387	1.32856e-10	3.55251e-09	PF01504(Phosphatidylinositol-4-phosphate 5-Kinase), PF02493(MORN repeat)	AT1G21980	phosphatidylinositol-4-phosphate 5-kinase 1
Medtr7g111770	-1.39529	0.322895	-4.3212	1.55182e-05	0.000132899
Medtr2g013780	-1.39546	0.239569	-5.82488	5.71534e-09	1.09748e-07	PF04720(PDDEXK-like family of unknown function)	AT4G32480	Protein of unknown function (DUF506)
Medtr3g055750	-1.39554	0.385251	-3.62241	0.000291876	0.00172906		AT3G18670	Ankyrin repeat family protein
Medtr3g019160	-1.39708	0.327327	-4.26815	1.971e-05	0.000163612	PF03358(NADPH-dependent FMN reductase)	AT3G27890	NADPH:quinone oxidoreductase
Medtr7g095230	-1.3977	0.370872	-3.76867	0.000164118	0.00104392	PF00234(Protease inhibitor/seed storage/LTP family)	AT3G22600	Bifunctional inhibitor/lipid-transfer protein/seed storage 2S albumin superfamily protein
Medtr2g014400	-1.39839	0.275373	-5.07817	3.81082e-07	4.88198e-06		AT2G33850
Medtr2g084540	-1.40037	0.231988	-6.03638	1.57615e-09	3.38769e-08	PF08510(PIG-P)	AT2G39445	Phosphatidylinositol N-acetylglucosaminyltransferase, GPI19/PIG-P subunit
Medtr5g061550	-1.40102	0.406571	-3.44594	0.000569081	0.0030666
Medtr2g041180	-1.40256	0.566557	-2.47559	0.0133017	0.0436414	PF03140(Plant protein of unknown function)	AT3G50120	Plant protein of unknown function (DUF247)
Medtr5g099250	-1.40366	0.384066	-3.65473	0.00025745	0.00155009		AT4G35320
Medtr2g008610	-1.40439	0.21878	-6.41918	1.37013e-10	3.63173e-09	PF00504(Chlorophyll A-B binding protein)	AT1G15820	light harvesting complex photosystem II subunit 6
Medtr8g107730	-1.40513	0.26691	-5.26444	1.40617e-07	1.98694e-06		AT5G42710
Medtr1g007540	-1.40571	0.483588	-2.90685	0.00365093	0.0149608	PF03169(OPT oligopeptide transporter protein)	AT5G53550	YELLOW STRIPE like 3
Medtr5g032670	-1.40819	0.313311	-4.49456	6.97125e-06	6.58106e-05
Medtr4g013345	-1.40988	0.252036	-5.59398	2.21924e-08	3.7478e-07	PF03018(Dirigent-like protein)	AT1G55210	Disease resistance-responsive (dirigent-like protein) family protein
Medtr7g010580	-1.41038	0.508265	-2.77489	0.00552197	0.0211578	PF02704(Gibberellin regulated protein)	AT5G15230	GAST1 protein homolog 4
Medtr4g076440	-1.41068	0.276434	-5.10311	3.3411e-07	4.33264e-06	PF00332(Glycosyl hydrolases family 17)	AT4G16260	Glycosyl hydrolase superfamily protein
Medtr3g064420	-1.4115	0.321241	-4.3939	1.11334e-05	9.913e-05	PF00501(AMP-binding enzyme)	AT1G65890	acyl activating enzyme 12
Medtr4g051682	-1.41161	0.356193	-3.96305	7.39979e-05	0.000523781	PF01582(TIR domain), PF00931(NB-ARC domain)	AT5G36930	Disease resistance protein (TIR-NBS-LRR class) family
Medtr2g093970	-1.41305	0.372242	-3.79605	0.000147023	0.000950937	PF02469(Fasciclin domain)	AT5G60490	FASCICLIN-like arabinogalactan-protein 12
MT4Noble_054822	-1.41343	0.203847	-6.93377	4.09782e-12	1.48036e-10
Medtr4g080350	-1.41356	0.161045	-8.7774	1.67302e-18	1.96895e-16	PF00226(DnaJ domain)	AT2G42750	DNAJ heat shock N-terminal domain-containing protein
Medtr8g065030	-1.4161	0.363747	-3.89308	9.89784e-05	0.000675502	PF00295(Glycosyl hydrolases family 28)	AT1G23460	Pectin lyase-like superfamily protein
Medtr8g069160	-1.41693	0.368674	-3.84332	0.000121383	0.000806583	PF02365(No apical meristem (NAM) protein)	AT4G28500	NAC domain containing protein 73
Medtr5g016830	-1.41739	0.221033	-6.4126	1.43063e-10	3.76059e-09	PF05911(Filament-like plant protein, long coiled-coil)	AT2G23360	Plant protein of unknown function (DUF869)
Medtr4g063090	-1.4176	0.379671	-3.73377	0.000188637	0.00117976	PF00230(Major intrinsic protein)	AT2G36830	gamma tonoplast intrinsic protein
Medtr6g028050	-1.41826	0.394463	-3.59541	0.000323878	0.00188936	PF08372(Plant phosphoribosyltransferase C-terminal), PF11696(Protein of unknown function (DUF3292)), PF00168(C2 domain)	AT5G17980	C2 calcium/lipid-binding plant phosphoribosyltransferase family protein
Medtr2g087230	-1.41884	0.346853	-4.0906	4.3025e-05	0.000326354	PF00560(Leucine Rich Repeat), PF00069(Protein kinase domain), PF08263(Leucine rich repeat N-terminal domain)	AT2G01820	Leucine-rich repeat protein kinase family protein
Medtr4g092550	-1.41888	0.276504	-5.1315	2.87442e-07	3.78492e-06	PF07714(Protein tyrosine kinase)	AT5G48380	BAK1-interacting receptor-like kinase 1
Medtr7g086300	-1.42017	0.104416	-13.6011	3.94609e-42	8.7077e-39	PF08267(Cobalamin-independent synthase, N-terminal domain), PF01717(Cobalamin-independent synthase, Catalytic domain)	AT5G17920	Cobalamin-independent synthase family protein
Medtr2g070730	-1.42124	0.347572	-4.08906	4.33132e-05	0.000328352		AT1G17140	interactor of constitutive active rops 1
Medtr2g076970	-1.42302	0.234565	-6.06664	1.30618e-09	2.85376e-08	PF00004(ATPase family associated with various cellular activities (AAA))	AT3G50940	P-loop containing nucleoside triphosphate hydrolases superfamily protein
Medtr4g055170	-1.42359	0.44314	-3.21252	0.00131578	0.00630622	PF02458(Transferase family)	AT5G07080	HXXXD-type acyl-transferase family protein
Medtr4g451295	-1.42413	0.21397	-6.65573	2.81894e-11	8.46321e-10	PF10695()
Medtr1g090930	-1.42547	0.166572	-8.55764	1.15203e-17	1.187e-15	PF00139(Legume lectin domain)	AT5G10530	Concanavalin A-like lectin protein kinase family protein
Medtr6g011870	-1.42597	0.322195	-4.42581	9.6079e-06	8.68318e-05	PF00504(Chlorophyll A-B binding protein)	AT1G29930	chlorophyll A/B binding protein 1
Medtr2g076990	-1.42649	0.276754	-5.15435	2.54516e-07	3.39013e-06	PF00004(ATPase family associated with various cellular activities (AAA))	AT3G50940	P-loop containing nucleoside triphosphate hydrolases superfamily protein
Medtr8g096670	-1.42789	0.450621	-3.16872	0.00153112	0.00716959	PF03134(TB2/DP1, HVA22 family)	AT5G50720	HVA22 homologue E
Medtr5g083910	-1.43018	0.16847	-8.4892	2.08066e-17	2.05762e-15	PF11721(Di-glucose binding within endoplasmic reticulum), PF07714(Protein tyrosine kinase), PF00560(Leucine Rich Repeat)	AT3G14840	Leucine-rich repeat transmembrane protein kinase
Medtr6g015390	-1.43072	0.216791	-6.59955	4.12421e-11	1.20407e-09		AT1G26355	SPIRAL1-like1
MT4Noble_009941	-1.432	0.544299	-2.6309	0.00851596	0.0301757
Medtr3g035620	-1.43383	0.227652	-6.29836	3.00819e-10	7.45153e-09
Medtr4g007600	-1.4345	0.307534	-4.66452	3.09343e-06	3.1898e-05
Medtr1g101120	-1.43793	0.541403	-2.65593	0.00790899	0.0283934	PF06521(PAR1 protein)	AT5G52390	PAR1 protein
Medtr8g044230	-1.43816	0.465315	-3.09072	0.0019967	0.00901647	PF00069(Protein kinase domain), PF00560(Leucine Rich Repeat)	AT5G14210	Leucine-rich repeat protein kinase family protein
MT4Noble_021940	-1.43978	0.201432	-7.14772	8.82284e-13	3.58877e-11
Medtr2g461970	-1.44072	0.169261	-8.51179	1.71274e-17	1.71145e-15	PF03214(Reversibly glycosylated polypeptide)	AT3G02230	reversibly glycosylated polypeptide 1
Medtr0635s0010	-1.44081	0.305045	-4.72326	2.3209e-06	2.47612e-05	PF00403(Heavy-metal-associated domain)	AT4G05030	Copper transport protein family
Medtr5g029370	-1.44127	0.358185	-4.02382	5.72611e-05	0.000417687	PF02928(C5HC2 zinc finger), PF02375(jmjN domain), PF02373(JmjC domain, hydroxylase)	AT5G46910	Transcription factor jumonji (jmj) family protein / zinc finger (C5HC2 type) family protein
Medtr8g007020	-1.44137	0.547586	-2.63222	0.00848288	0.0300866	PF02298(Plastocyanin-like domain)	AT2G44790	uclacyanin 2
Medtr4g015570	-1.44168	0.209462	-6.88279	5.86905e-12	2.04838e-10	PF00504(Chlorophyll A-B binding protein)	AT3G08940	light harvesting complex photosystem II
Medtr6g074860	-1.44395	0.553845	-2.60713	0.00913035	0.0320524	PF00249(Myb-like DNA-binding domain)	AT1G17950	myb domain protein 52
Medtr8g087400	-1.44541	0.590288	-2.44866	0.0143389	0.0464469	PF04859(Plant protein of unknown function (DUF641))	AT1G29300	Plant protein of unknown function (DUF641)
Medtr8g072510	-1.44888	0.267008	-5.42636	5.75139e-08	8.8288e-07		AT4G10720	Ankyrin repeat family protein
MT4Noble_021936	-1.44909	0.208635	-6.94561	3.76822e-12	1.37252e-10
MT4Noble_021937	-1.44909	0.208635	-6.94561	3.76822e-12	1.37252e-10
Medtr4g109770	-1.45019	0.358562	-4.04447	5.24413e-05	0.000387387	PF03110(SBP domain)	AT1G69170	Squamosa promoter-binding protein-like (SBP domain) transcription factor family protein
Medtr4g013350	-1.45142	0.217316	-6.67886	2.40802e-11	7.31243e-10	PF03018(Dirigent-like protein)	AT1G55210	Disease resistance-responsive (dirigent-like protein) family protein
Medtr4g128337	-1.45144	0.15007	-9.67177	3.97434e-22	8.22191e-20	PF00501(AMP-binding enzyme)	AT3G21240	4-coumarate:CoA ligase 2
Medtr8g020690	-1.45154	0.518059	-2.80187	0.00508073	0.0197762	PF03492(SAM dependent carboxyl methyltransferase)	AT3G11480	S-adenosyl-L-methionine-dependent methyltransferases superfamily protein
Medtr8g006815	-1.45363	0.571001	-2.54576	0.010904	0.0369712	PF00847(AP2 domain)	AT2G44840	ethylene-responsive element binding factor 13
Medtr0002s0250	-1.45449	0.212198	-6.8544	7.16145e-12	2.44375e-10
Medtr2g034910	-1.45516	0.241747	-6.01933	1.75138e-09	3.73101e-08
Medtr7g089400	-1.45794	0.590523	-2.4689	0.013553	0.0443451	PF00010(Helix-loop-helix DNA-binding domain)	AT2G41130	basic helix-loop-helix (bHLH) DNA-binding superfamily protein
Medtr3g045760	-1.45829	0.583636	-2.49862	0.0124676	0.0413365
Medtr4g112035	-1.45872	0.511947	-2.84935	0.00438083	0.0174364	PF06075(Plant protein of unknown function (DUF936))	AT4G13370	Plant protein of unknown function (DUF936)
Medtr7g026890	-1.45886	0.320028	-4.55856	5.15061e-06	5.02906e-05		AT3G48190	ataxia-telangiectasia mutated
Medtr4g006070	-1.46005	0.206305	-7.07715	1.47151e-12	5.76413e-11	PF10695()
Medtr4g086130	-1.46026	0.244857	-5.96373	2.46548e-09	5.10844e-08	PF00067(Cytochrome P450)	AT3G19270	cytochrome P450, family 707, subfamily A, polypeptide 4
Medtr2g014380	-1.46162	0.494214	-2.95747	0.00310172	0.0130869
Medtr4g088810	-1.46444	0.162902	-8.98969	2.47922e-19	3.26981e-17	PF00305(Lipoxygenase), PF01477(PLAT/LH2 domain)	AT1G17420	lipoxygenase 3
Medtr7g090230	-1.46804	0.461052	-3.18411	0.001452	0.00686342	PF00462(Glutaredoxin)	AT2G41330	Glutaredoxin family protein
Medtr2g027600	-1.46812	0.321747	-4.56297	5.04356e-06	4.94459e-05	PF00403(Heavy-metal-associated domain)	AT4G05030	Copper transport protein family
Medtr1g107550	-1.4682	0.226027	-6.49568	8.26593e-11	2.3016e-09	PF08246(Cathepsin propeptide inhibitor domain (I29)), PF00112(Papain family cysteine protease), PF00396(Granulin)	AT5G43060	Granulin repeat cysteine protease family protein
Medtr3g116080	-1.4685	0.289808	-5.06714	4.03831e-07	5.13861e-06	PF00112(Papain family cysteine protease), PF08246(Cathepsin propeptide inhibitor domain (I29))	AT1G20850	xylem cysteine peptidase 2
Medtr3g113970	-1.46899	0.246425	-5.96121	2.50384e-09	5.17577e-08	PF03953(Tubulin C-terminal domain), PF00091(Tubulin/FtsZ family, GTPase domain)	AT1G75780	tubulin beta-1 chain
Medtr8g039950	-1.47005	0.311211	-4.72366	2.31635e-06	2.47226e-05	PF02458(Transferase family)	AT5G17540	HXXXD-type acyl-transferase family protein
Medtr5g023730	-1.47021	0.327643	-4.48723	7.21548e-06	6.7802e-05	PF00501(AMP-binding enzyme)	AT1G20560	acyl activating enzyme 1
Medtr8g042780	-1.47237	0.200944	-7.32727	2.34893e-13	1.09893e-11	PF07690(Major Facilitator Superfamily)	AT5G13750	zinc induced facilitator-like 1
Medtr7g011010	-1.47253	0.488908	-3.01188	0.00259637	0.0112602	PF00036(EF hand)	AT5G39670	Calcium-binding EF-hand family protein
Medtr8g469180	-1.47338	0.549594	-2.68086	0.00734333	0.0266811	PF02671(Paired amphipathic helix repeat)	AT3G01320	SIN3-like 1
Medtr2g449840	-1.47407	0.471702	-3.12501	0.00177801	0.00815834	PF00702(haloacid dehalogenase-like hydrolase), PF00690(Cation transporter/ATPase, N-terminus), PF00122(E1-E2 ATPase)	AT3G42640	H(+)-ATPase 8
Medtr3g116590	-1.47457	0.401209	-3.67532	0.000237548	0.00144438	PF00069(Protein kinase domain)	AT4G34500	Protein kinase superfamily protein
Medtr2g086790	-1.47539	0.294409	-5.01136	5.40454e-07	6.68124e-06	PF03168(Late embryogenesis abundant protein)	AT3G44220	Late embryogenesis abundant (LEA) hydroxyproline-rich glycoprotein family
Medtr2g438330	-1.47572	0.544835	-2.70856	0.00675762	0.0249362
Medtr0079s0070	-1.47815	0.313211	-4.71935	2.36594e-06	2.51809e-05	PF08100(Dimerisation domain), PF00891(O-methyltransferase)	AT5G54160	O-methyltransferase 1
Medtr4g120270	-1.47919	0.42237	-3.50212	0.000461569	0.0025618	PF00097(Zinc finger, C3HC4 type (RING finger))	AT3G16720	TOXICOS EN LEVADURA 2
Medtr4g097480	-1.48009	0.575598	-2.5714	0.0101288	0.0348416
Medtr1g054150	-1.48106	0.23655	-6.26107	3.82352e-10	9.27169e-09
Medtr5g077850	-1.48176	0.207021	-7.15751	8.2154e-13	3.36235e-11	PF00026(Eukaryotic aspartyl protease)	AT1G66180	Eukaryotic aspartyl protease family protein
Medtr5g068910	-1.48384	0.218476	-6.79177	1.10763e-11	3.62546e-10
Medtr1g028090	-1.4847	0.420503	-3.53078	0.000414337	0.00233887		AT1G66920	Protein kinase superfamily protein
Medtr6g090535	-1.48704	0.402605	-3.69354	0.000221156	0.00135875	PF06376(Protein of unknown function (DUF1070))	AT3G61640	arabinogalactan protein 20
Medtr6g088805	-1.48789	0.463146	-3.21258	0.0013155	0.006306	PF01554(MatE)	AT4G29140	MATE efflux family protein
Medtr4g063130	-1.48812	0.393237	-3.78428	0.000154152	0.000988329	PF06136(Domain of unknown function (DUF966))	AT5G59790	Domain of unknown function (DUF966)
Medtr2g090875	-1.4885	0.38927	-3.82383	0.000131396	0.000863798	PF00071(Ras family)	AT4G35020	RAC-like 3
Medtr1g102230	-1.48868	0.438505	-3.39489	0.000686567	0.0036072	PF01120(Alpha-L-fucosidase)	AT2G28100	alpha-L-fucosidase 1
Medtr7g105170	-1.48919	0.364859	-4.08154	4.47379e-05	0.000337702	PF02365(No apical meristem (NAM) protein)	AT5G22380	NAC domain containing protein 90
Medtr3g008580	-1.49027	0.361934	-4.11754	3.82945e-05	0.000294436	PF00394(Multicopper oxidase), PF07731(Multicopper oxidase), PF07732(Multicopper oxidase)	AT4G25240	SKU5 similar 1
Medtr6g084250	-1.49063	0.31569	-4.72182	2.33741e-06	2.49273e-05
Medtr4g088030	-1.49091	0.346811	-4.29891	1.7164e-05	0.000144931	PF03005()	AT1G29050	TRICHOME BIREFRINGENCE-LIKE 38
Medtr5g027240	-1.49137	0.282345	-5.28207	1.27735e-07	1.82226e-06	PF05368(NmrA-like family)	AT1G32100	pinoresinol reductase 1
Medtr2g014760	-1.49194	0.304056	-4.9068	9.25764e-07	1.09001e-05	PF00462(Glutaredoxin)	AT1G28480	Thioredoxin superfamily protein
Medtr0160s0040	-1.49348	0.302673	-4.93431	8.04328e-07	9.5983e-06	PF04535(Domain of unknown function (DUF588))	AT5G54980	Uncharacterised protein family (UPF0497)
Medtr2g046150	-1.49481	0.540543	-2.76538	0.00568568	0.0216504	PF04398(Protein of unknown function, DUF538)	AT4G24130	Protein of unknown function, DUF538
Medtr7g007540	-1.49516	0.474179	-3.15316	0.00161515	0.00751653	PF07714(Protein tyrosine kinase)	AT4G08850	Leucine-rich repeat receptor-like protein kinase family protein
Medtr5g017350	-1.49685	0.16769	-8.92628	4.40588e-19	5.69111e-17	PF01494(FAD binding domain), PF00498(FHA domain)	AT5G67030	zeaxanthin epoxidase (ZEP) (ABA1)
Medtr1g025430	-1.49983	0.171087	-8.76645	1.84387e-18	2.12286e-16	PF00183(Hsp90 protein), PF02518(Histidine kinase-, DNA gyrase B-, and HSP90-like ATPase)	AT4G24190	Chaperone protein htpG family protein
Medtr3g083910	-1.50023	0.368737	-4.06856	4.73049e-05	0.000354753	PF02797(Chalcone and stilbene synthases, C-terminal domain), PF00195(Chalcone and stilbene synthases, N-terminal domain)	AT5G13930	Chalcone and stilbene synthase family protein
Medtr3g075030	-1.50107	0.343688	-4.36752	1.25663e-05	0.000110505		AT5G50360
Medtr7g084770	-1.50119	0.452046	-3.32087	0.000897366	0.00454345	PF00722(Glycosyl hydrolases family 16), PF06955(Xyloglucan endo-transglycosylase (XET) C-terminus)	AT5G13870	xyloglucan endotransglucosylase/hydrolase 5
Medtr4g007740	-1.50186	0.349759	-4.29398	1.75499e-05	0.000147859	PF00026(Eukaryotic aspartyl protease)	AT1G79720	Eukaryotic aspartyl protease family protein
Medtr7g109360	-1.50268	0.334726	-4.48927	7.14673e-06	6.72514e-05	PF00226(DnaJ domain)	AT4G02100	Heat shock protein DnaJ with tetratricopeptide repeat
Medtr4g038440	-1.50695	0.295078	-5.10695	3.27408e-07	4.26242e-06	PF08100(Dimerisation domain), PF00891(O-methyltransferase)	AT5G54160	O-methyltransferase 1
Medtr0684s0020	-1.50745	0.352527	-4.27614	1.90166e-05	0.000158551	PF00139(Legume lectin domain)	AT5G10530	Concanavalin A-like lectin protein kinase family protein
Medtr1g099050	-1.5081	0.349507	-4.31492	1.59659e-05	0.000135985	PF00282(Pyridoxal-dependent decarboxylase conserved domain)	AT1G43710	Pyridoxal phosphate (PLP)-dependent transferases superfamily protein
Medtr4g058015	-1.50925	0.499566	-3.02113	0.00251833	0.0109879	PF04784(Protein of unknown function, DUF547)	AT5G60720	Protein of unknown function, DUF547
Medtr6g027550	-1.50993	0.519005	-2.90927	0.00362272	0.0148682	PF02485(Core-2/I-Branching enzyme)	AT3G03690	Core-2/I-branching beta-1,6-N-acetylglucosaminyltransferase family protein
Medtr1g106430	-1.51141	0.472673	-3.19759	0.00138581	0.00660125	PF00651(BTB/POZ domain), PF03000(NPH3 family)	AT2G14820	Phototropic-responsive NPH3 family protein
Medtr6g071410	-1.5126	0.382308	-3.95649	7.60587e-05	0.000536646	PF03168(Late embryogenesis abundant protein)	AT2G35980	Late embryogenesis abundant (LEA) hydroxyproline-rich glycoprotein family
Medtr3g035680	-1.51421	0.295799	-5.11903	3.07113e-07	4.02392e-06	PF00016(Ribulose bisphosphate carboxylase large chain, catalytic domain)	ATCG00490	ribulose-bisphosphate carboxylases
Medtr4g068520	-1.51482	0.108354	-13.9803	2.05524e-44	4.94754e-41	PF05562(Cold acclimation protein WCOR413)	AT3G50830	cold-regulated 413-plasma membrane 2
Medtr0163s0020	-1.51611	0.38063	-3.98317	6.80029e-05	0.000484845	PF00139(Legume lectin domain)	AT5G10530	Concanavalin A-like lectin protein kinase family protein
Medtr7g104360	-1.51612	0.476032	-3.18492	0.00144794	0.00685004	PF00149(Calcineurin-like phosphoesterase)	AT3G52780	Purple acid phosphatases superfamily protein
Medtr1g039020	-1.51695	0.216878	-6.99449	2.66226e-12	9.92912e-11
Medtr2g093980	-1.51771	0.482386	-3.14626	0.00165372	0.00767446	PF02469(Fasciclin domain)	AT5G03170	FASCICLIN-like arabinogalactan-protein 11
Medtr2g008240	-1.51855	0.237579	-6.39178	1.63963e-10	4.26917e-09	PF00933(Glycosyl hydrolase family 3 N terminal domain), PF01915(Glycosyl hydrolase family 3 C-terminal domain)	AT5G64570	beta-D-xylosidase 4
Medtr1g006490	-1.52021	0.507517	-2.99538	0.00274103	0.0117848	PF00230(Major intrinsic protein)	AT2G25810	tonoplast intrinsic protein 4;1
Medtr8g100075	-1.52065	0.431432	-3.52466	0.000424022	0.00238591	PF03141(Putative S-adenosyl-L-methionine-dependent methyltransferase)	AT1G33170	S-adenosyl-L-methionine-dependent methyltransferases superfamily protein
MT4Noble_052989	-1.5208	0.533932	-2.84831	0.00439516	0.0174856
Medtr6g090080	-1.52286	0.562257	-2.70848	0.00675915	0.0249383	PF00560(Leucine Rich Repeat), PF08263(Leucine rich repeat N-terminal domain)	AT4G29240	Leucine-rich repeat (LRR) family protein
Medtr6g032990	-1.5245	0.266635	-5.71755	1.0807e-08	1.96275e-07	PF00249(Myb-like DNA-binding domain)	AT3G04030	Homeodomain-like superfamily protein
Medtr8g107370	-1.52487	0.195103	-7.81571	5.46539e-15	3.57342e-13	PF08241(Methyltransferase domain)	AT1G48600	S-adenosyl-L-methionine-dependent methyltransferases superfamily protein
Medtr5g007760	-1.52621	0.436834	-3.4938	0.000476201	0.0026343	PF02797(Chalcone and stilbene synthases, C-terminal domain), PF00195(Chalcone and stilbene synthases, N-terminal domain)	AT5G13930	Chalcone and stilbene synthase family protein
Medtr8g014910	-1.52976	0.307781	-4.97028	6.68559e-07	8.08377e-06	PF00657(GDSL-like Lipase/Acylhydrolase)	AT3G16370	GDSL-like Lipase/Acylhydrolase superfamily protein
Medtr4g485570	-1.53202	0.482537	-3.17492	0.00149875	0.00704295	PF04669(Polysaccharide biosynthesis)	AT5G67210	Protein of unknown function (DUF579)
Medtr1g040175	-1.53244	0.274284	-5.58703	2.3098e-08	3.8834e-07	PF02458(Transferase family)	AT5G17540	HXXXD-type acyl-transferase family protein
Medtr2g062300	-1.53298	0.58719	-2.61071	0.0090355	0.0317532	PF06075(Plant protein of unknown function (DUF936))	AT2G31920	Plant protein of unknown function (DUF936)
Medtr2g091110	-1.53581	0.485673	-3.16223	0.00156568	0.00730946	PF07899(Frigida-like protein)	AT5G27220	Frigida-like protein
Medtr7g075453	-1.53821	0.544343	-2.82582	0.00471602	0.0185654	PF02469(Fasciclin domain)	AT3G60900	FASCICLIN-like arabinogalactan-protein 10
Medtr7g105850	-1.53985	0.254283	-6.05565	1.39849e-09	3.03292e-08	PF00026(Eukaryotic aspartyl protease)	AT3G52500	Eukaryotic aspartyl protease family protein
Medtr1g111350	-1.54094	0.448966	-3.43219	0.000598717	0.00320478	PF00026(Eukaryotic aspartyl protease)	AT1G25510	Eukaryotic aspartyl protease family protein
Medtr6g463390	-1.54166	0.410212	-3.7582	0.000171138	0.00108241		AT4G23140	cysteine-rich RLK (RECEPTOR-like protein kinase) 6
Medtr3g479460	-1.54273	0.35376	-4.36096	1.2949e-05	0.000113513	PF00305(Lipoxygenase), PF01477(PLAT/LH2 domain)	AT3G45140	lipoxygenase 2
Medtr7g059810	-1.54322	0.565371	-2.72956	0.00634183	0.0236557	PF03140(Plant protein of unknown function)	AT3G50120	Plant protein of unknown function (DUF247)
Medtr5g020800	-1.54399	0.282165	-5.47195	4.45119e-08	7.00758e-07	PF05368(NmrA-like family)	AT1G75290	NAD(P)-binding Rossmann-fold superfamily protein
Medtr2g097520	-1.54438	0.331813	-4.65436	3.24983e-06	3.3342e-05		AT5G59480	Haloacid dehalogenase-like hydrolase (HAD) superfamily protein
Medtr4g090580	-1.54531	0.333745	-4.6302	3.65317e-06	3.70302e-05	PF07992(Pyridine nucleotide-disulphide oxidoreductase), PF00070(Pyridine nucleotide-disulphide oxidoreductase)	AT1G07180	alternative NAD(P)H dehydrogenase 1
Medtr4g051662	-1.54554	0.326	-4.74094	2.12728e-06	2.28799e-05	PF01582(TIR domain), PF00931(NB-ARC domain)	AT5G36930	Disease resistance protein (TIR-NBS-LRR class) family
Medtr8g091320	-1.54643	0.288644	-5.35759	8.43394e-08	1.25256e-06	PF01658(Myo-inositol-1-phosphate synthase), PF07994(Myo-inositol-1-phosphate synthase)	AT5G10170	myo-inositol-1-phosphate synthase 3
Medtr8g013610	-1.54679	0.384432	-4.02358	5.73211e-05	0.000417798	PF00954(S-locus glycoprotein domain), PF07714(Protein tyrosine kinase), PF01453(D-mannose binding lectin), PF08276(PAN-like domain)	AT1G11330	S-locus lectin protein kinase family protein
Medtr5g020760	-1.54751	0.276616	-5.59443	2.21348e-08	3.74046e-07	PF05368(NmrA-like family)	AT1G75290	NAD(P)-binding Rossmann-fold superfamily protein
Medtr8g006260	-1.55056	0.249448	-6.21598	5.10068e-10	1.20165e-08	PF00201(UDP-glucoronosyl and UDP-glucosyl transferase)	AT4G01070	UDP-Glycosyltransferase superfamily protein
Medtr3g035610	-1.55082	0.232278	-6.67659	2.44562e-11	7.41811e-10	PF00253(Ribosomal protein S14p/S29e)	ATCG00330	chloroplast ribosomal protein S14
Medtr5g062660	-1.5514	0.248663	-6.23894	4.40558e-10	1.05384e-08	PF00293(NUDIX domain)	AT1G68760	nudix hydrolase 1
Medtr5g071010	-1.55433	0.454702	-3.41836	0.000629996	0.00335053	PF00388(Phosphatidylinositol-specific phospholipase C, X domain), PF09279(Phosphoinositide-specific phospholipase C, efhand-like), PF00168(C2 domain), PF00387(Phosphatidylinositol-specific phospholipase C, Y domain)	AT5G58700	phosphatidylinositol-speciwc phospholipase C4
Medtr6g091680	-1.55502	0.279418	-5.56522	2.61817e-08	4.35759e-07	PF01596(O-methyltransferase)	AT4G26220	S-adenosyl-L-methionine-dependent methyltransferases superfamily protein
Medtr3g062540	-1.5551	0.186802	-8.32484	8.44398e-17	7.38073e-15	PF03000(NPH3 family)	AT2G30520	Phototropic-responsive NPH3 family protein
Medtr5g007730	-1.55599	0.23437	-6.63903	3.15747e-11	9.42614e-10	PF02797(Chalcone and stilbene synthases, C-terminal domain), PF00195(Chalcone and stilbene synthases, N-terminal domain)	AT5G13930	Chalcone and stilbene synthase family protein
Medtr4g007540	-1.55615	0.162842	-9.55617	1.22191e-21	2.36176e-19	PF02458(Transferase family)	AT5G48930	hydroxycinnamoyl-CoA shikimate/quinate hydroxycinnamoyl transferase
Medtr7g083060	-1.5563	0.226835	-6.86092	6.84189e-12	2.33772e-10	PF00403(Heavy-metal-associated domain)	AT5G17450	Heavy metal transport/detoxification superfamily protein
Medtr5g034200	-1.55685	0.623169	-2.49827	0.01248	0.0413607		AT1G23530
Medtr3g464370	-1.55904	0.182775	-8.52981	1.46583e-17	1.4815e-15	PF01419(Jacalin-like lectin domain)	AT1G19715	Mannose-binding lectin superfamily protein
Medtr4g075760	-1.55997	0.380403	-4.10083	4.11671e-05	0.000313971	PF02519(Auxin responsive protein)	AT1G29450	SAUR-like auxin-responsive protein family
Medtr7g021780	-1.56008	0.498936	-3.12681	0.00176715	0.00811692	PF02823(ATP synthase, Delta/Epsilon chain, beta-sandwich domain), PF02874(ATP synthase alpha/beta family, beta-barrel domain), PF00306(ATP synthase alpha/beta chain, C terminal domain), PF00006(ATP synthase alpha/beta family, nucleotide-binding domain), PF00401(ATP synthase, Delta/Epsilon chain, long alpha-helix domain)	ATCG00480	ATP synthase subunit beta
MT4Noble_024296	-1.56288	0.532567	-2.93462	0.00333953	0.0138977
MT4Noble_024415	-1.56433	0.366731	-4.26562	1.99351e-05	0.000165273
Medtr1g051670	-1.56552	0.563919	-2.77614	0.00550079	0.021095		AT1G61190	LRR and NB-ARC domains-containing disease resistance protein
Medtr1g041875	-1.5657	0.403807	-3.87735	0.000105602	0.000715177	PF00854(POT family)	AT5G46050	peptide transporter 3
MT4Noble_024345	-1.56587	0.234316	-6.68272	2.34546e-11	7.13063e-10
Medtr7g090920	-1.57085	0.427878	-3.67126	0.000241356	0.00146484	PF01565(FAD binding domain ), PF09265(Cytokinin dehydrogenase 1, FAD and cytokinin binding)	AT2G41510	cytokinin oxidase/dehydrogenase 1
Medtr0372s0010	-1.57674	0.645644	-2.44213	0.0146011	0.0471853		AT5G60760	P-loop containing nucleoside triphosphate hydrolases superfamily protein
Medtr6g047570	-1.57845	0.390655	-4.04054	5.33288e-05	0.000392918	PF00010(Helix-loop-helix DNA-binding domain)	AT4G37850	basic helix-loop-helix (bHLH) DNA-binding superfamily protein
MT4Noble_054821	-1.57847	0.239393	-6.59365	4.29152e-11	1.25154e-09
Medtr6g070890	-1.57954	0.367829	-4.29423	1.75304e-05	0.000147742	PF03168(Late embryogenesis abundant protein)	AT2G35980	Late embryogenesis abundant (LEA) hydroxyproline-rich glycoprotein family
Medtr5g032660	-1.58764	0.640164	-2.48006	0.0131362	0.0431731	PF03959(Serine hydrolase (FSH1))	AT5G65400	alpha/beta-Hydrolases superfamily protein
Medtr0102s0060	-1.59093	0.338984	-4.69322	2.68935e-06	2.81367e-05	PF03321(GH3 auxin-responsive promoter)	AT4G03400	Auxin-responsive GH3 family protein
Medtr1g103160	-1.59144	0.21348	-7.45474	9.00449e-14	4.64793e-12	PF07765(KIP1-like protein)	AT3G22790	Kinase interacting (KIP1-like) family protein
Medtr2g089290	-1.59179	0.241795	-6.58321	4.60401e-11	1.33233e-09	PF00954(S-locus glycoprotein domain), PF07714(Protein tyrosine kinase), PF01453(D-mannose binding lectin), PF08276(PAN-like domain)	AT4G03230	S-locus lectin protein kinase family protein
Medtr3g008500	-1.59263	0.340238	-4.68094	2.85564e-06	2.96888e-05	PF02358(Trehalose-phosphatase)	AT5G51460	Haloacid dehalogenase-like hydrolase (HAD) superfamily protein
Medtr8g470840	-1.59379	0.497915	-3.20092	0.00136988	0.00652885	PF08263(Leucine rich repeat N-terminal domain)	AT5G20480	EF-TU receptor
Medtr6g038940	-1.59387	0.262136	-6.08032	1.1994e-09	2.64227e-08	PF08263(Leucine rich repeat N-terminal domain), PF00560(Leucine Rich Repeat)	AT2G34930	disease resistance family protein / LRR family protein
Medtr4g097700	-1.5939	0.385862	-4.13076	3.61561e-05	0.000280684	PF06955(Xyloglucan endo-transglycosylase (XET) C-terminus), PF00722(Glycosyl hydrolases family 16)	AT5G65730	xyloglucan endotransglucosylase/hydrolase 6
Medtr8g074530	-1.59429	0.28906	-5.51545	3.47893e-08	5.6275e-07	PF03087(Arabidopsis protein of unknown function)	AT4G35690	Arabidopsis protein of unknown function (DUF241)
MT4Noble_012118	-1.59531	0.414083	-3.85263	0.000116857	0.00078279
Medtr4g076430	-1.596	0.16136	-9.8909	4.55911e-23	1.07791e-20	PF00332(Glycosyl hydrolases family 17)	AT4G16260	Glycosyl hydrolase superfamily protein
Medtr4g019010	-1.59661	0.562595	-2.83794	0.00454053	0.0179721	PF00560(Leucine Rich Repeat), PF08263(Leucine rich repeat N-terminal domain)	AT1G47890	receptor like protein 7
Medtr2g102660	-1.59743	0.423913	-3.76829	0.000164369	0.00104527	PF01061(ABC-2 type transporter), PF08370(Plant PDR ABC transporter associated), PF00005(ABC transporter)	AT1G15520	pleiotropic drug resistance 12
Medtr7g081750	-1.59827	0.24321	-6.57156	4.97921e-11	1.43471e-09	PF05922(Peptidase inhibitor I9), PF00082(Subtilase family), PF02225(PA domain)	AT5G59810	Subtilase family protein
Medtr3g460780	-1.60033	0.511452	-3.12899	0.00175407	0.00806245	PF02469(Fasciclin domain)	AT5G55730	FASCICLIN-like arabinogalactan 1
Medtr3g024510	-1.60169	0.364493	-4.39429	1.11135e-05	9.9019e-05	PF00657(GDSL-like Lipase/Acylhydrolase)	AT1G29670	GDSL-like Lipase/Acylhydrolase superfamily protein
Medtr1g108330	-1.60597	0.364711	-4.40341	1.06561e-05	9.52643e-05		AT2G01300
Medtr5g026290	-1.60716	0.391414	-4.10603	4.02509e-05	0.000308137
Medtr3g013440	-1.6082	0.527452	-3.049	0.00229605	0.0101632	PF00249(Myb-like DNA-binding domain)	AT2G21650	Homeodomain-like superfamily protein
Medtr5g018820	-1.61096	0.309501	-5.20503	1.93963e-07	2.65434e-06	PF04784(Protein of unknown function, DUF547)	AT5G66600	Protein of unknown function, DUF547
Medtr2g008330	-1.61201	0.398572	-4.04445	5.24465e-05	0.000387387	PF07731(Multicopper oxidase), PF07732(Multicopper oxidase), PF00394(Multicopper oxidase)	AT5G09360	laccase 14
Medtr1g077990	-1.61285	0.503245	-3.20489	0.00135112	0.00645342	PF00332(Glycosyl hydrolases family 17)	AT1G32860	Glycosyl hydrolase superfamily protein
Medtr7g053050	-1.61301	0.495199	-3.2573	0.00112478	0.00550334	PF00954(S-locus glycoprotein domain), PF08276(PAN-like domain), PF01453(D-mannose binding lectin), PF00069(Protein kinase domain)	AT2G19130	S-locus lectin protein kinase family protein
Medtr4g415290	-1.61365	0.214895	-7.50899	5.95864e-14	3.18115e-12	PF01553(Acyltransferase)	AT2G38110	glycerol-3-phosphate acyltransferase 6
Medtr5g067410	-1.61404	0.201971	-7.99146	1.33354e-15	9.62185e-14	PF01488(Shikimate / quinate 5-dehydrogenase), PF05201(Glutamyl-tRNAGlu reductase, N-terminal domain), PF00745(Glutamyl-tRNAGlu reductase, dimerisation domain)	AT1G58290	Glutamyl-tRNA reductase family protein
MT4Noble_001343	-1.61577	0.628218	-2.57199	0.0101116	0.0348073
Medtr0009s0100	-1.61638	0.3462	-4.66891	3.028e-06	3.12599e-05
Medtr5g076380	-1.6183	0.337785	-4.79092	1.66015e-06	1.84167e-05		AT1G65810	P-loop containing nucleoside triphosphate hydrolases superfamily protein
Medtr5g025250	-1.62699	0.460584	-3.53244	0.000411746	0.00232575	PF03055(Retinal pigment epithelial membrane protein)	AT4G19170	nine-cis-epoxycarotenoid dioxygenase 4
Medtr1g073700	-1.62853	0.168557	-9.66162	4.38857e-22	9.00847e-20	PF02353(Mycolic acid cyclopropane synthetase), PF01593(Flavin containing amine oxidoreductase)	AT3G23510	Cyclopropane-fatty-acyl-phospholipid synthase
Medtr6g068930	-1.62929	0.17543	-9.28741	1.58089e-20	2.55255e-18	PF00107(Zinc-binding dehydrogenase), PF08240(Alcohol dehydrogenase GroES-like domain)	AT5G24760	GroES-like zinc-binding dehydrogenase family protein
Medtr0041s0100	-1.62951	0.448784	-3.63094	0.000282395	0.00168079	PF03641(Possible lysine decarboxylase)	AT2G37210	lysine decarboxylase family protein
Medtr1g021855	-1.63012	0.215404	-7.56776	3.79728e-14	2.09483e-12	PF01501(Glycosyl transferase family 8)	AT3G50760	galacturonosyltransferase-like 2
Medtr1g064090	-1.63066	0.205904	-7.91949	2.38479e-15	1.63599e-13	PF00221(Aromatic amino acid lyase)	AT2G37040	PHE ammonia lyase 1
Medtr3g062500	-1.63154	0.348834	-4.67713	2.90916e-06	3.01741e-05	PF00069(Protein kinase domain), PF00560(Leucine Rich Repeat), PF08263(Leucine rich repeat N-terminal domain)	AT5G58300	Leucine-rich repeat protein kinase family protein
Medtr2g044880	-1.63198	0.154852	-10.539	5.71123e-26	2.01644e-23	PF04043(Plant invertase/pectin methylesterase inhibitor), PF01095(Pectinesterase)	AT4G33220	pectin methylesterase 44
Medtr3g047390	-1.63264	0.396842	-4.11409	3.88712e-05	0.000298524	PF02364(1,3-beta-glucan synthase component )	AT1G06490	glucan synthase-like 7
Medtr4g075750	-1.63362	0.298235	-5.47762	4.3108e-08	6.8068e-07	PF01490(Transmembrane amino acid transporter protein)	AT1G47670	Transmembrane amino acid transporter family protein
Medtr4g075730	-1.63608	0.455736	-3.58997	0.000330718	0.00192217		AT2G41990
Medtr3g064780	-1.64114	0.38602	-4.25143	2.12411e-05	0.000174733		AT2G45760	BON association protein 2
Medtr1g101130	-1.64252	0.300836	-5.45986	4.76517e-08	7.46637e-07	PF03953(Tubulin C-terminal domain), PF00091(Tubulin/FtsZ family, GTPase domain)	AT5G23860	tubulin beta 8
Medtr4g108330	-1.64266	0.233252	-7.04241	1.88949e-12	7.24076e-11	PF03271(EB1-like C-terminal motif), PF00307(Calponin homology (CH) domain)	AT5G62500	end binding protein 1B
Medtr7g014430	-1.64292	0.229239	-7.16686	7.67371e-13	3.16256e-11	PF00560(Leucine Rich Repeat), PF08263(Leucine rich repeat N-terminal domain)	AT2G34930	disease resistance family protein / LRR family protein
Medtr1g025950	-1.64705	0.268158	-6.1421	8.14389e-10	1.84949e-08	PF08240(Alcohol dehydrogenase GroES-like domain), PF00107(Zinc-binding dehydrogenase)	AT4G39330	cinnamyl alcohol dehydrogenase 9
Medtr5g018270	-1.64818	0.260684	-6.32251	2.57346e-10	6.4654e-09	PF00394(Multicopper oxidase), PF07732(Multicopper oxidase), PF07731(Multicopper oxidase)	AT5G66920	SKU5 similar 17
Medtr4g092010	-1.64985	0.671103	-2.45842	0.0139552	0.0454453	PF03936(Terpene synthase family, metal binding domain), PF01397(Terpene synthase, N-terminal domain)	AT1G61680	terpene synthase 14
Medtr3g027045	-1.65015	0.5774	-2.8579	0.00426457	0.0170506
Medtr5g040755	-1.65365	0.479663	-3.44752	0.000565756	0.00304992
Medtr5g012810	-1.65372	0.566475	-2.91932	0.003508	0.0144646	PF00230(Major intrinsic protein)	AT5G47450	tonoplast intrinsic protein 2;3
Medtr4g104240	-1.65373	0.293831	-5.62816	1.82138e-08	3.13795e-07	PF00657(GDSL-like Lipase/Acylhydrolase)	AT3G48460	GDSL-like Lipase/Acylhydrolase superfamily protein
Medtr8g079380	-1.65409	0.465241	-3.55533	0.000377501	0.00215854	PF00560(Leucine Rich Repeat)	AT5G66910	Disease resistance protein (CC-NBS-LRR class) family
Medtr6g070900	-1.65558	0.621547	-2.66365	0.00772982	0.0278636	PF03168(Late embryogenesis abundant protein)	AT2G35980	Late embryogenesis abundant (LEA) hydroxyproline-rich glycoprotein family
Medtr2g083250	-1.65816	0.253116	-6.55099	5.71566e-11	1.63446e-09	PF02298(Plastocyanin-like domain)	AT3G20570	early nodulin-like protein 9
Medtr1g054205	-1.65969	0.405131	-4.09667	4.1914e-05	0.00031884	PF00141(Peroxidase)	AT5G06720	peroxidase 2
Medtr7g108600	-1.6599	0.686106	-2.41931	0.01555	0.049706	PF05498(Rapid ALkalinization Factor (RALF) )	AT1G02900	rapid alkalinization factor 1
Medtr8g028725	-1.66	0.32717	-5.07382	3.89903e-07	4.97333e-06	PF00295(Glycosyl hydrolases family 28)	AT3G61490	Pectin lyase-like superfamily protein
Medtr6g463400	-1.66052	0.361885	-4.58855	4.4634e-06	4.42662e-05	PF01657(Salt stress response/antifungal)	AT4G05200	cysteine-rich RLK (RECEPTOR-like protein kinase) 25
Medtr4g055520	-1.66064	0.18428	-9.01152	2.03217e-19	2.77381e-17	PF00535(Glycosyl transferase family 2)	AT5G22740	cellulose synthase-like A02
Medtr1g066850	-1.66136	0.366612	-4.53166	5.85227e-06	5.62076e-05		AT2G37080	ROP interactive partner 3
Medtr4g096830	-1.66363	0.633025	-2.62807	0.00858706	0.030395
Medtr1g087880	-1.66424	0.308331	-5.39758	6.75443e-08	1.01971e-06	PF00225(Kinesin motor domain), PF00307(Calponin homology (CH) domain)	AT2G47500	P-loop nucleoside triphosphate hydrolases superfamily protein with CH (Calponin Homology) domain
Medtr0204s0020	-1.66869	0.394478	-4.23012	2.33563e-05	0.000189833	PF00083(Sugar (and other) transporter)	AT4G02050	sugar transporter protein 7
Medtr4g116360	-1.66955	0.584629	-2.85575	0.00429351	0.0171456
Medtr7g071680	-1.671	0.490275	-3.4083	0.000653698	0.00345645	PF00106(short chain dehydrogenase)	AT3G51680	NAD(P)-binding Rossmann-fold superfamily protein
Medtr2g105570	-1.67124	0.165955	-10.0704	7.46635e-24	1.90105e-21	PF00501(AMP-binding enzyme)	AT3G21240	4-coumarate:CoA ligase 2
Medtr5g098720	-1.67224	0.292764	-5.71189	1.11729e-08	2.02227e-07	PF00221(Aromatic amino acid lyase)	AT2G37040	PHE ammonia lyase 1
Medtr2g059540	-1.67638	0.315192	-5.31861	1.04564e-07	1.51469e-06	PF02701(Dof domain, zinc finger)	AT5G60850	OBF binding protein 4
Medtr6g065430	-1.67706	0.175462	-9.55794	1.20121e-21	2.33883e-19	PF07859(alpha/beta hydrolase fold)	AT5G23530	carboxyesterase 18
Medtr7g021640	-1.67748	0.166565	-10.071	7.42048e-24	1.90105e-21	PF00182(Chitinase class I)	AT1G05850	Chitinase family protein
Medtr4g072190	-1.67846	0.339742	-4.94039	7.79671e-07	9.32085e-06	PF02519(Auxin responsive protein)	AT4G34760	SAUR-like auxin-responsive protein family
Medtr7g114960	-1.68105	0.227718	-7.38215	1.55755e-13	7.63776e-12	PF02458(Transferase family)	AT4G29250	HXXXD-type acyl-transferase family protein
Medtr7g084760	-1.68173	0.57941	-2.90248	0.00370218	0.0151247	PF00722(Glycosyl hydrolases family 16), PF06955(Xyloglucan endo-transglycosylase (XET) C-terminus)	AT5G13870	xyloglucan endotransglucosylase/hydrolase 5
Medtr4g097670	-1.68966	0.391862	-4.31187	1.61879e-05	0.000137699	PF00722(Glycosyl hydrolases family 16), PF06955(Xyloglucan endo-transglycosylase (XET) C-terminus)	AT5G65730	xyloglucan endotransglucosylase/hydrolase 6
Medtr6g071400	-1.69198	0.653112	-2.59065	0.00957955	0.0333323	PF03168(Late embryogenesis abundant protein)	AT2G35980	Late embryogenesis abundant (LEA) hydroxyproline-rich glycoprotein family
Medtr4g021875	-1.69287	0.291976	-5.79798	6.71175e-09	1.26677e-07		AT5G02440
Medtr1g047370	-1.69616	0.381832	-4.44216	8.90622e-06	8.1211e-05	PF00544(Pectate lyase)	AT4G13710	Pectin lyase-like superfamily protein
Medtr4g055310	-1.7009	0.288935	-5.88677	3.93808e-09	7.78793e-08	PF00800(Prephenate dehydratase)	AT1G08250	arogenate dehydratase 6
Medtr7g113950	-1.70107	0.53965	-3.15217	0.00162062	0.00753802	PF11250(Fantastic Four meristem regulator)	AT1G54740	Protein of unknown function (DUF3049)
Medtr6g006950	-1.70177	0.660113	-2.578	0.00993744	0.0343395	PF07816(Protein of unknown function (DUF1645))	AT3G27880	Protein of unknown function (DUF1645)
Medtr1g084200	-1.70454	0.306317	-5.56462	2.62722e-08	4.36991e-07	PF04398(Protein of unknown function, DUF538)	AT1G09310	Protein of unknown function, DUF538
Medtr3g110720	-1.70498	0.236722	-7.20249	5.91215e-13	2.50887e-11	PF00091(Tubulin/FtsZ family, GTPase domain), PF03953(Tubulin C-terminal domain)	AT4G14960	Tubulin/FtsZ family protein
Medtr3g008530	-1.70638	0.697199	-2.44748	0.0143859	0.0465808	PF11837(Domain of unknown function (DUF3357)), PF08244(Glycosyl hydrolases family 32 C terminal), PF00251(Glycosyl hydrolases family 32 N-terminal domain)	AT1G62660	Glycosyl hydrolases family 32 protein
Medtr6g090470	-1.70771	0.511295	-3.33997	0.00083787	0.00428234	PF00069(Protein kinase domain)	AT5G56580	MAP kinase kinase 6
Medtr3g436860	-1.70983	0.289931	-5.89737	3.69352e-09	7.34819e-08	PF00646(F-box domain)	AT2G32560	F-box family protein
Medtr7g104905	-1.71169	0.175547	-9.7506	1.83389e-22	3.98044e-20
Medtr1g086450	-1.71468	0.256157	-6.69385	2.17369e-11	6.62363e-10
Medtr4g072830	-1.71894	0.652407	-2.63477	0.00841951	0.0299171	PF02519(Auxin responsive protein)	AT4G38840	SAUR-like auxin-responsive protein family
Medtr5g012080	-1.7203	0.651355	-2.64111	0.00826352	0.0294585	PF02365(No apical meristem (NAM) protein)	AT1G12260	NAC 007
Medtr8g079450	-1.72108	0.399373	-4.30947	1.63648e-05	0.000139069	PF00931(NB-ARC domain), PF00560(Leucine Rich Repeat)	AT5G66900	Disease resistance protein (CC-NBS-LRR class) family
Medtr5g069180	-1.72384	0.627695	-2.7463	0.00602724	0.0227191	PF09507(DNA polymerase subunit Cdc27), PF00403(Heavy-metal-associated domain)	AT5G24580	Heavy metal transport/detoxification superfamily protein
Medtr2g090660	-1.72643	0.677676	-2.54758	0.0108473	0.0368063		AT1G03820
Medtr4g415300	-1.72755	0.463956	-3.72352	0.000196461	0.00122263	PF00230(Major intrinsic protein)	AT4G00430	plasma membrane intrinsic protein 1;4
Medtr4g069940	-1.72925	0.303634	-5.69519	1.23235e-08	2.20044e-07	PF00332(Glycosyl hydrolases family 17), PF07983(X8 domain)	AT4G34480	O-Glycosyl hydrolases family 17 protein
MT4Noble_001747	-1.72964	0.375667	-4.60417	4.14106e-06	4.13793e-05
Medtr5g037890	-1.7318	0.26631	-6.50293	7.87685e-11	2.21187e-09	PF00085(Thioredoxin)	AT5G39950	thioredoxin 2
Medtr5g016440	-1.73245	0.50698	-3.41719	0.000632704	0.00336083	PF00067(Cytochrome P450)	AT4G37340	cytochrome P450, family 81, subfamily D, polypeptide 3
Medtr4g093660	-1.73454	0.419548	-4.1343	3.56043e-05	0.000276806		AT4G33640
Medtr3g110205	-1.73671	0.410305	-4.23273	2.3087e-05	0.000187874	PF00847(AP2 domain)	AT5G11590	Integrase-type DNA-binding superfamily protein
Medtr3g101870	-1.7384	0.590415	-2.94436	0.00323619	0.0135678	PF00447(HSF-type DNA-binding)	AT1G46264	heat shock transcription factor B4
Medtr5g073240	-1.73954	0.694914	-2.50325	0.0123058	0.0409165	PF00067(Cytochrome P450)	AT1G13110	cytochrome P450, family 71 subfamily B, polypeptide 7
Medtr4g006210	-1.74102	0.649657	-2.67991	0.00736419	0.0267532		AT1G80630	RNI-like superfamily protein
Medtr2g016470	-1.74446	0.403812	-4.31997	1.56051e-05	0.000133505	PF10250(GDP-fucose protein O-fucosyltransferase)	AT1G29200	O-fucosyltransferase family protein
Medtr7g025000	-1.74491	0.592842	-2.9433	0.00324732	0.0136025	PF07649(C1-like domain), PF03107(C1 domain)	AT2G16050	Cysteine/Histidine-rich C1 domain family protein
Medtr7g011330	-1.74782	0.653298	-2.67538	0.00746443	0.0270653	PF03105(SPX domain), PF03124(EXS family)	AT3G29060	EXS (ERD1/XPR1/SYG1) family protein
Medtr8g092010	-1.75109	0.344112	-5.08871	3.60506e-07	4.63408e-06	PF03106(WRKY DNA -binding domain)	AT5G64810	WRKY DNA-binding protein 51
Medtr3g111990	-1.75457	0.476414	-3.68287	0.000230624	0.00140777	PF05368(NmrA-like family)	AT4G39230	NmrA-like negative transcriptional regulator family protein
Medtr3g085210	-1.75601	0.205841	-8.53093	1.45172e-17	1.47285e-15	PF00234(Protease inhibitor/seed storage/LTP family)	AT1G27950	glycosylphosphatidylinositol-anchored lipid protein transfer 1
Medtr8g064180	-1.7566	0.541656	-3.24301	0.00118275	0.00574962	PF00722(Glycosyl hydrolases family 16), PF06955(Xyloglucan endo-transglycosylase (XET) C-terminus)	AT1G10550	xyloglucan:xyloglucosyl transferase 33
Medtr2g091250	-1.75675	0.603392	-2.91146	0.00359749	0.0147784	PF07899(Frigida-like protein)	AT5G27220	Frigida-like protein
Medtr4g033790	-1.75713	0.368623	-4.76673	1.87244e-06	2.04801e-05	PF04674(Phosphate-induced protein 1 conserved region)	AT5G51550	EXORDIUM like 3
Medtr1g028300	-1.75732	0.304786	-5.76574	8.13003e-09	1.50811e-07	PF00481(Protein phosphatase 2C)	AT2G29380	highly ABA-induced PP2C gene 3
Medtr7g015180	-1.75903	0.515033	-3.41537	0.00063696	0.00337807	PF03031(NLI interacting factor-like phosphatase)	AT4G26190	Haloacid dehalogenase-like hydrolase (HAD) superfamily protein
Medtr2g014300	-1.75935	0.313002	-5.62091	1.89957e-08	3.25359e-07	PF00847(AP2 domain)	AT1G28360	ERF domain protein 12
Medtr6g027580	-1.76011	0.639616	-2.75182	0.00592656	0.0223941	PF01699(Sodium/calcium exchanger protein)	AT5G17860	calcium exchanger 7
Medtr4g451275	-1.76066	0.561782	-3.13407	0.001724	0.00794217	PF00006(ATP synthase alpha/beta family, nucleotide-binding domain), PF02874(ATP synthase alpha/beta family, beta-barrel domain), PF00306(ATP synthase alpha/beta chain, C terminal domain)	ATCG00480	ATP synthase subunit beta
Medtr3g082260	-1.76289	0.392171	-4.49521	6.95021e-06	6.56354e-05		AT5G48290	Heavy metal transport/detoxification superfamily protein
Medtr6g075410	-1.76587	0.298635	-5.91314	3.35648e-09	6.74351e-08		AT3G17700	cyclic nucleotide-binding transporter 1
Medtr6g045200	-1.76746	0.405371	-4.36011	1.29997e-05	0.000113871	PF03595(Voltage-dependent anion channel)	AT5G24030	SLAC1 homologue 3
Medtr6g015880	-1.76752	0.546623	-3.23353	0.0012227	0.00592201	PF04833(COBRA-like protein)	AT5G15630	COBRA-like extracellular glycosyl-phosphatidyl inositol-anchored protein family
Medtr3g091680	-1.76838	0.228533	-7.73795	1.01033e-14	6.23625e-13		AT4G27810
Medtr4g088245	-1.77175	0.351185	-5.04505	4.53401e-07	5.7036e-06	PF02365(No apical meristem (NAM) protein)	AT1G28470	NAC domain containing protein 10
Medtr0006s0080	-1.77331	0.312229	-5.67952	1.35074e-08	2.39633e-07	PF00931(NB-ARC domain)	AT4G27190	NB-ARC domain-containing disease resistance protein
Medtr7g093820	-1.77467	0.284549	-6.23678	4.46669e-10	1.06749e-08	PF03018(Dirigent-like protein)	AT5G42500	Disease resistance-responsive (dirigent-like protein) family protein
Medtr3g117090	-1.77669	0.420739	-4.22279	2.41295e-05	0.000195517	PF03765(CRAL/TRIO, N-terminal domain), PF00650(CRAL/TRIO domain)	AT2G21540	SEC14-like 3
Medtr4g084270	-1.77832	0.228872	-7.76994	7.85257e-15	4.95086e-13	PF02880(Phosphoglucomutase/phosphomannomutase, alpha/beta/alpha domain III), PF02878(Phosphoglucomutase/phosphomannomutase, alpha/beta/alpha domain I), PF02879(Phosphoglucomutase/phosphomannomutase, alpha/beta/alpha domain II)	AT1G70820	phosphoglucomutase, putative / glucose phosphomutase, putative
Medtr1g041300	-1.77932	0.539607	-3.29744	0.000975711	0.00486936		AT4G14650
Medtr5g028130	-1.78124	0.522891	-3.40652	0.000657966	0.00347555		AT3G18670	Ankyrin repeat family protein
Medtr8g042490	-1.783	0.407631	-4.37405	1.2196e-05	0.000107614	PF03083(Sugar efflux transporter for intercellular exchange)	AT3G14770	Nodulin MtN3 family protein
Medtr3g058320	-1.78523	0.350601	-5.09191	3.54483e-07	4.56774e-06
Medtr7g117980	-1.78813	0.243833	-7.33342	2.2436e-13	1.05525e-11		AT2G46630
Medtr3g456110	-1.78838	0.704409	-2.53884	0.0111221	0.0376039
Medtr1g028320	-1.79379	0.457089	-3.92438	8.69544e-05	0.000605298	PF01182(Glucosamine-6-phosphate isomerases/6-phosphogluconolactonase)	AT5G24400	NagB/RpiA/CoA transferase-like superfamily protein
Medtr1g095540	-1.79537	0.541669	-3.31451	0.000918053	0.00463313	PF00450(Serine carboxypeptidase)	AT3G07990	serine carboxypeptidase-like 27
Medtr2g089030	-1.79542	0.461201	-3.89293	9.90405e-05	0.000675752	PF01373(Glycosyl hydrolase family 14)	AT2G32290	beta-amylase 6
Medtr3g067430	-1.80042	0.570126	-3.15793	0.00158891	0.00740615	PF08027(Albumin I chain b)
Medtr3g035730	-1.80058	0.590304	-3.05026	0.00228647	0.0101264	PF00006(ATP synthase alpha/beta family, nucleotide-binding domain), PF02874(ATP synthase alpha/beta family, beta-barrel domain), PF00306(ATP synthase alpha/beta chain, C terminal domain)	ATCG00480	ATP synthase subunit beta
Medtr8g090205	-1.8184	0.395963	-4.59235	4.38277e-06	4.35318e-05	PF03859(CG-1 domain), PF00023(Ankyrin repeat)	AT2G22300	signal responsive 1
Medtr3g060900	-1.81847	0.461018	-3.94447	7.99757e-05	0.000561441	PF00225(Kinesin motor domain), PF00307(Calponin homology (CH) domain)	AT3G44730	kinesin-like protein 1
Medtr5g060880	-1.82214	0.55222	-3.29967	0.000967991	0.00483722		AT1G22030
Medtr2g048860	-1.82289	0.448646	-4.0631	4.8426e-05	0.000361931
Medtr1g008160	-1.82943	0.282436	-6.47733	9.33599e-11	2.58325e-09	PF03007(Wax ester synthase-like Acyl-CoA acyltransferase domain), PF06974(Protein of unknown function (DUF1298))	AT5G53390	O-acyltransferase (WSD1-like) family protein
Medtr8g056780	-1.82994	0.42579	-4.29776	1.72536e-05	0.00014564	PF01737(YCF9)	ATCG00300	YCF9
Medtr3g111880	-1.83542	0.267432	-6.86313	6.73685e-12	2.31078e-10	PF00249(Myb-like DNA-binding domain)	AT4G39250	RAD-like 1
Medtr2g071760	-1.83848	0.513374	-3.58116	0.000342066	0.00197814
Medtr7g033765	-1.84191	0.560836	-3.28422	0.00102264	0.00507013	PF00401(ATP synthase, Delta/Epsilon chain, long alpha-helix domain), PF02874(ATP synthase alpha/beta family, beta-barrel domain), PF00006(ATP synthase alpha/beta family, nucleotide-binding domain), PF02823(ATP synthase, Delta/Epsilon chain, beta-sandwich domain), PF00306(ATP synthase alpha/beta chain, C terminal domain)	ATCG00480	ATP synthase subunit beta
Medtr8g033150	-1.8428	0.712768	-2.58542	0.00972614	0.0337237	PF00082(Subtilase family), PF02225(PA domain), PF05922(Peptidase inhibitor I9)	AT4G00230	xylem serine peptidase 1
Medtr1g018200	-1.84397	0.263846	-6.98882	2.77216e-12	1.02667e-10	PF01301(Glycosyl hydrolases family 35)	AT4G26140	beta-galactosidase 12
Medtr1g095850	-1.84501	0.562248	-3.28148	0.00103263	0.00511675	PF03195(Protein of unknown function DUF260)	AT1G07900	LOB domain-containing protein 1
Medtr1g116270	-1.84689	0.233928	-7.89512	2.90028e-15	1.96418e-13	PF00043(Glutathione S-transferase, C-terminal domain)	AT3G55040	glutathione transferase lambda 2
Medtr7g102120	-1.84691	0.565632	-3.26522	0.00109381	0.00537267	PF02772(S-adenosylmethionine synthetase, central domain), PF02773(S-adenosylmethionine synthetase, C-terminal domain), PF00438(S-adenosylmethionine synthetase, N-terminal domain)	AT2G36880	methionine adenosyltransferase 3
Medtr4g085590	-1.84903	0.153034	-12.0824	1.30801e-33	1.237e-30	PF01596(O-methyltransferase)	AT4G34050	S-adenosyl-L-methionine-dependent methyltransferases superfamily protein
Medtr2g017970	-1.84932	0.272925	-6.77592	1.23618e-11	3.99197e-10	PF02469(Fasciclin domain)	AT5G60490	FASCICLIN-like arabinogalactan-protein 12
Medtr5g053250	-1.85025	0.37685	-4.90977	9.11842e-07	1.07649e-05	PF03188(Eukaryotic cytochrome b561)	AT1G26100	Cytochrome b561/ferric reductase transmembrane protein family
Medtr8g070700	-1.85145	0.426285	-4.34321	1.40415e-05	0.00012168	PF01697(Glycosyltransferase family 92)	AT4G20170	Domain of unknown function (DUF23)
Medtr6g034030	-1.85302	0.296405	-6.25165	4.06131e-10	9.77668e-09	PF03595(Voltage-dependent anion channel)	AT5G24030	SLAC1 homologue 3
Medtr5g010120	-1.8531	0.700909	-2.64384	0.00819703	0.029257	PF06203(CCT motif)	AT5G41380	CCT motif family protein
Medtr5g430470	-1.85546	0.61476	-3.01819	0.00254286	0.0110767
Medtr6g012520	-1.85548	0.23412	-7.92536	2.27493e-15	1.56876e-13	PF03330(Rare lipoprotein A (RlpA)-like double-psi beta-barrel), PF01357(Pollen allergen)	AT2G03090	expansin A15
Medtr1g068970	-1.85767	0.325341	-5.70992	1.1303e-08	2.04163e-07	PF00106(short chain dehydrogenase)	AT5G02540	NAD(P)-binding Rossmann-fold superfamily protein
Medtr8g085900	-1.85776	0.373282	-4.97684	6.46303e-07	7.84757e-06		AT3G13600	calmodulin-binding family protein
Medtr5g035030	-1.85972	0.577207	-3.22193	0.0012733	0.00613591	PF00069(Protein kinase domain)	AT1G24030	Protein kinase superfamily protein
Medtr5g084750	-1.86033	0.462026	-4.02646	5.66231e-05	0.00041385	PF00657(GDSL-like Lipase/Acylhydrolase)	AT2G42990	GDSL-like Lipase/Acylhydrolase superfamily protein
Medtr6g084270	-1.86068	0.326616	-5.69684	1.22051e-08	2.18078e-07
Medtr4g078810	-1.86125	0.469232	-3.96659	7.29091e-05	0.000516903	PF00249(Myb-like DNA-binding domain)	AT2G20570	GBF\'s pro-rich region-interacting factor 1
Medtr2g095750	-1.86465	0.333419	-5.59249	2.23832e-08	3.77521e-07	PF00450(Serine carboxypeptidase)	AT3G45010	serine carboxypeptidase-like 48
Medtr3g466760	-1.86467	0.460107	-4.0527	5.06306e-05	0.000375621	PF03330(Rare lipoprotein A (RlpA)-like double-psi beta-barrel), PF01357(Pollen allergen)	AT2G40610	expansin A8
Medtr7g071760	-1.867	0.581654	-3.20981	0.00132823	0.00635551	PF07107(Wound-induced protein WI12)	AT5G01740	Nuclear transport factor 2 (NTF2) family protein
Medtr3g065440	-1.87092	0.316173	-5.91741	3.2705e-09	6.58577e-08	PF00249(Myb-like DNA-binding domain)	AT1G66230	myb domain protein 20
Medtr3g055830	-1.87122	0.43803	-4.2719	1.93811e-05	0.000161134	PF00931(NB-ARC domain)	AT3G07040	NB-ARC domain-containing disease resistance protein
Medtr2g100250	-1.87533	0.591171	-3.17223	0.00151273	0.00709102	PF00614(Phospholipase D Active site motif), PF12357(Phospholipase D C terminal )	AT1G55180	phospholipase D alpha 4
Medtr4g023390	-1.87637	0.707167	-2.65336	0.00796955	0.0285643	PF08372(Plant phosphoribosyltransferase C-terminal)	AT5G48060	C2 calcium/lipid-binding plant phosphoribosyltransferase family protein
Medtr4g019750	-1.87859	0.30027	-6.25634	3.94128e-10	9.52236e-09
Medtr5g005420	-1.88097	0.491152	-3.82971	0.000128292	0.000847388	PF06219(Protein of unknown function (DUF1005))	AT3G19680	Protein of unknown function (DUF1005)
Medtr7g085410	-1.88131	0.453007	-4.15293	3.28242e-05	0.000257384	PF00320(GATA zinc finger)	AT4G32890	GATA transcription factor 9
Medtr4g049640	-1.88336	0.528531	-3.56338	0.000366111	0.00209862	PF03595(Voltage-dependent anion channel)	AT1G62280	SLAC1 homologue 1
Medtr2g007960	-1.886	0.60659	-3.10919	0.00187599	0.0085446	PF00892(EamA-like transporter family)	AT1G25270	nodulin MtN21 /EamA-like transporter family protein
Medtr6g023760	-1.88619	0.428203	-4.40491	1.05827e-05	9.4714e-05	PF02298(Plastocyanin-like domain)	AT3G27200	Cupredoxin superfamily protein
Medtr4g091100	-1.88777	0.492221	-3.83521	0.000125458	0.000830738		AT1G61340	F-box family protein
Medtr1g109320	-1.88964	0.448587	-4.21242	2.5265e-05	0.000203596	PF00642(Zinc finger C-x8-C-x5-C-x3-H type (and similar))	AT1G68200	Zinc finger C-x8-C-x5-C-x3-H type family protein
Medtr7g085200	-1.89403	0.470308	-4.02721	5.64434e-05	0.000412879	PF01150(GDA1/CD39 (nucleoside phosphatase) family)	AT5G18280	apyrase 2
Medtr1g025250	-1.89457	0.351729	-5.38645	7.18617e-08	1.07935e-06	PF02704(Gibberellin regulated protein)	AT1G75750	GAST1 protein homolog 1
Medtr7g113860	-1.8952	0.428858	-4.41917	9.90788e-06	8.92687e-05	PF00657(GDSL-like Lipase/Acylhydrolase)	AT1G54790	GDSL-like Lipase/Acylhydrolase superfamily protein
Medtr2g075480	-1.89524	0.474776	-3.99185	6.55601e-05	0.000468691
Medtr2g026920	-1.89538	0.42436	-4.46645	7.95287e-06	7.36336e-05	PF00234(Protease inhibitor/seed storage/LTP family)	AT5G46890	Bifunctional inhibitor/lipid-transfer protein/seed storage 2S albumin superfamily protein
Medtr5g035010	-1.89539	0.315131	-6.01461	1.80316e-09	3.83515e-08	PF00407(Pathogenesis-related protein Bet v I family)	AT1G24020	MLP-like protein 423
Medtr6g012110	-1.8962	0.602794	-3.14569	0.00165697	0.00768549	PF00504(Chlorophyll A-B binding protein)	AT1G29930	chlorophyll A/B binding protein 1
Medtr6g045553	-1.89729	0.240891	-7.87616	3.37605e-15	2.25183e-13	PF02458(Transferase family)	AT5G23940	HXXXD-type acyl-transferase family protein
Medtr6g086115	-1.89919	0.222959	-8.51811	1.62183e-17	1.63293e-15		AT3G24480	Leucine-rich repeat (LRR) family protein
Medtr2g005910	-1.90017	0.694734	-2.7351	0.00623611	0.0233731		AT1G58070
Medtr3g060220	-1.90331	0.305768	-6.22469	4.82507e-10	1.1418e-08	PF03552(Cellulose synthase)	AT1G55850	cellulose synthase like E1
Medtr7g065880	-1.90422	0.347559	-5.47882	4.28168e-08	6.76888e-07	PF12043(Domain of unknown function (DUF3527))	AT5G01030	Protein of unknown function (DUF3527)
Medtr7g109550	-1.90707	0.710304	-2.68487	0.00725587	0.026414	PF03005()	AT3G62390	TRICHOME BIREFRINGENCE-LIKE 6
Medtr4g124800	-1.90803	0.516564	-3.6937	0.000221016	0.00135821	PF00743(Flavin-binding monooxygenase-like)	AT1G19250	flavin-dependent monooxygenase 1
MT4Noble_036094	-1.91122	0.215711	-8.8601	7.99441e-19	9.84613e-17
Medtr8g107360	-1.91429	0.599848	-3.19129	0.00141638	0.00672385	PF03547(Membrane transport protein)	AT1G73590	Auxin efflux carrier family protein
Medtr3g064190	-1.9144	0.380471	-5.03165	4.86276e-07	6.07628e-06		AT1G65810	P-loop containing nucleoside triphosphate hydrolases superfamily protein
Medtr1g022250	-1.91531	0.282843	-6.77166	1.27315e-11	4.10135e-10	PF00004(ATPase family associated with various cellular activities (AAA))	AT5G40010	AAA-ATPase 1
Medtr3g118010	-1.91842	0.776678	-2.47004	0.0135099	0.0442201	PF00230(Major intrinsic protein)	AT4G35100	plasma membrane intrinsic protein 3
Medtr5g006370	-1.91908	0.653694	-2.93574	0.00332748	0.0138584	PF00903(Glyoxalase/Bleomycin resistance protein/Dioxygenase superfamily)	AT2G32090	Lactoylglutathione lyase / glyoxalase I family protein
Medtr4g131920	-1.92318	0.449907	-4.27462	1.91467e-05	0.000159435		AT1G22710	sucrose-proton symporter 2
Medtr1g107055	-1.92342	0.666735	-2.88483	0.00391628	0.0158713		AT1G24625	zinc finger protein 7
Medtr2g029815	-1.92579	0.403277	-4.77536	1.79386e-06	1.97265e-05	PF00141(Peroxidase)	AT5G06730	Peroxidase superfamily protein
Medtr5g083980	-1.92585	0.426433	-4.51617	6.29673e-06	5.99559e-05	PF05701(Weak chloroplast movement under blue light)	AT2G40480	Plant protein of unknown function (DUF827)
Medtr6g004880	-1.92805	0.502019	-3.84058	0.000122742	0.000814998	PF05691(Raffinose synthase or seed imbibition protein Sip1)	AT5G40390	Raffinose synthase family protein
Medtr4g129760	-1.93009	0.392303	-4.91989	8.65926e-07	1.02502e-05		AT4G30460	glycine-rich protein
Medtr7g118170	-1.93145	0.300935	-6.41815	1.37939e-10	3.6459e-09	PF08541(3-Oxoacyl-[acyl-carrier-protein (ACP)] synthase III C terminal ), PF08392(FAE1/Type III polyketide synthase-like protein)	AT1G01120	3-ketoacyl-CoA synthase 1
Medtr2g090265	-1.93204	0.272384	-7.09305	1.31191e-12	5.21612e-11	PF01357(Pollen allergen), PF03330(Rare lipoprotein A (RlpA)-like double-psi beta-barrel)	AT4G28250	expansin B3
Medtr1g086430	-1.93265	0.342901	-5.63616	1.73885e-08	3.013e-07
Medtr7g093850	-1.93297	0.382587	-5.05235	4.36402e-07	5.51332e-06	PF03018(Dirigent-like protein)	AT5G42500	Disease resistance-responsive (dirigent-like protein) family protein
Medtr8g432480	-1.93305	0.530091	-3.64664	0.000265694	0.00159406	PF00168(C2 domain)	AT2G45760	BON association protein 2
Medtr1g063280	-1.93381	0.725765	-2.66451	0.00771013	0.0278148	PF02519(Auxin responsive protein)	AT3G09870	SAUR-like auxin-responsive protein family
Medtr1g022500	-1.93384	0.596845	-3.24011	0.00119486	0.00580121
Medtr2g036780	-1.93538	0.67671	-2.85999	0.00423655	0.0169641	PF02458(Transferase family)	AT4G24510	HXXXD-type acyl-transferase family protein
Medtr4g022410	-1.93852	0.706606	-2.74343	0.00608015	0.0228827	PF00097(Zinc finger, C3HC4 type (RING finger))	AT2G37580	RING/U-box superfamily protein
Medtr3g007970	-1.93937	0.282374	-6.86809	6.50692e-12	2.2377e-10	PF05368(NmrA-like family)	AT1G75280	NmrA-like negative transcriptional regulator family protein
Medtr2g009720	-1.94187	0.259807	-7.47429	7.76242e-14	4.07835e-12	PF00117(Glutamine amidotransferase class-I)	AT2G23970	Class I glutamine amidotransferase-like superfamily protein
Medtr3g115210	-1.94547	0.339603	-5.72865	1.01235e-08	1.84739e-07		AT1G42430
Medtr1g105585	-1.94672	0.762112	-2.55437	0.0106379	0.0362305	PF00069(Protein kinase domain), PF01657(Salt stress response/antifungal)	AT4G05200	cysteine-rich RLK (RECEPTOR-like protein kinase) 25
Medtr5g035580	-1.94906	0.696336	-2.79903	0.00512569	0.0199249	PF00201(UDP-glucoronosyl and UDP-glucosyl transferase)	AT1G24100	UDP-glucosyl transferase 74B1
Medtr7g099850	-1.95264	0.236441	-8.25845	1.47575e-16	1.2525e-14	PF00106(short chain dehydrogenase)	AT2G37540	NAD(P)-binding Rossmann-fold superfamily protein
Medtr4g008010	-1.95335	0.735568	-2.65557	0.00791744	0.0284199	PF02485(Core-2/I-Branching enzyme)	AT1G71070	Core-2/I-branching beta-1,6-N-acetylglucosaminyltransferase family protein
Medtr5g016250	-1.95501	0.322927	-6.05404	1.41256e-09	3.06093e-08		AT4G37450	arabinogalactan protein 18
Medtr7g417750	-1.95696	0.282846	-6.9188	4.55472e-12	1.62985e-10	PF06351(Allene oxide cyclase)	AT1G13280	allene oxide cyclase 4
Medtr5g086540	-1.9639	0.335341	-5.85642	4.72963e-09	9.18861e-08	PF00069(Protein kinase domain)	AT3G21630	chitin elicitor receptor kinase 1
MT4Noble_028619	-1.96926	0.667956	-2.94819	0.00319642	0.0134181
Medtr4g076570	-1.97017	0.784472	-2.51146	0.0120234	0.0401284	PF00332(Glycosyl hydrolases family 17)	AT4G16260	Glycosyl hydrolase superfamily protein
Medtr8g013810	-1.97031	0.466464	-4.22393	2.40079e-05	0.000194591	PF00690(Cation transporter/ATPase, N-terminus), PF00122(E1-E2 ATPase)	AT3G22910	ATPase E1-E2 type family protein / haloacid dehalogenase-like hydrolase family protein
Medtr5g017210	-1.97098	0.587095	-3.35718	0.000787422	0.00405581	PF00010(Helix-loop-helix DNA-binding domain)	AT3G50330	basic helix-loop-helix (bHLH) DNA-binding superfamily protein
Medtr7g010710	-1.97417	0.551184	-3.58168	0.000341388	0.00197552	PF01397(Terpene synthase, N-terminal domain), PF03936(Terpene synthase family, metal binding domain)	AT4G16740	terpene synthase 03
Medtr4g060580	-1.97421	0.44656	-4.42093	9.82791e-06	8.86689e-05
Medtr3g102670	-1.97497	0.444826	-4.43988	9.0011e-06	8.19069e-05	PF04788(Protein of unknown function (DUF620))	AT3G19540	Protein of unknown function (DUF620)
Medtr7g065630	-1.97558	0.798884	-2.47292	0.0134014	0.0439302	PF02798(Glutathione S-transferase, N-terminal domain), PF00043(Glutathione S-transferase, C-terminal domain)	AT2G29420	glutathione S-transferase tau 7
Medtr1g033130	-1.97994	0.31783	-6.22955	4.67765e-10	1.11089e-08	PF01190(Pollen proteins Ole e I like), PF04554(Extensin-like region)
Medtr4g104350	-1.98116	0.458978	-4.31645	1.58557e-05	0.000135264	PF00004(ATPase family associated with various cellular activities (AAA))	AT4G24790	AAA-type ATPase family protein
Medtr5g009660	-1.98243	0.455211	-4.35498	1.33077e-05	0.000116223	PF08263(Leucine rich repeat N-terminal domain), PF00560(Leucine Rich Repeat), PF00069(Protein kinase domain)	AT4G23740	Leucine-rich repeat protein kinase family protein
Medtr8g018747	-1.98314	0.484316	-4.09473	4.22654e-05	0.000321236	PF00403(Heavy-metal-associated domain)	AT5G24580	Heavy metal transport/detoxification superfamily protein
Medtr5g042910	-1.98452	0.733127	-2.70692	0.00679108	0.0250282	PF07059(Protein of unknown function (DUF1336))	AT3G29180	Protein of unknown function (DUF1336)
Medtr2g097950	-1.98623	0.563175	-3.52684	0.000420546	0.00236988	PF00171(Aldehyde dehydrogenase family)	AT4G36250	aldehyde dehydrogenase 3F1
Medtr4g109140	-1.98631	0.712411	-2.78815	0.00530094	0.0204858	PF04398(Protein of unknown function, DUF538)	AT2G03350	Protein of unknown function, DUF538
Medtr4g063975	-1.98641	0.340945	-5.82618	5.67096e-09	1.09054e-07	PF01357(Pollen allergen), PF03330(Rare lipoprotein A (RlpA)-like double-psi beta-barrel)	AT2G39700	expansin A4
Medtr1g010270	-1.98648	0.294281	-6.75029	1.47551e-11	4.67363e-10		AT2G25680	molybdate transporter 1
Medtr4g103620	-1.99375	0.469915	-4.24278	2.20767e-05	0.000180652	PF00156(Phosphoribosyl transferase domain), PF00485(Phosphoribulokinase / Uridine kinase family)	AT5G40870	uridine kinase/uracil phosphoribosyltransferase 1
Medtr3g107610	-1.99376	0.498949	-3.99591	6.44452e-05	0.000462468	PF00641(Zn-finger in Ran binding protein and others)	AT3G15680	Ran BP2/NZF zinc finger-like superfamily protein
Medtr2g014470	-1.99485	0.769328	-2.59297	0.00951501	0.0331654	PF01556(DnaJ C terminal domain), PF00226(DnaJ domain)	AT2G20560	DNAJ heat shock family protein
Medtr1g088925	-1.99502	0.552416	-3.61145	0.000304496	0.00179219	PF00462(Glutaredoxin)	AT1G06830	Glutaredoxin family protein
Medtr1g034270	-1.99765	0.440429	-4.53569	5.74153e-06	5.52857e-05		AT2G15960
Medtr7g092780	-2.00119	0.575825	-3.47534	0.000510212	0.00279429	PF01095(Pectinesterase)	AT1G05310	Pectin lyase-like superfamily protein
Medtr1g087270	-2.00175	0.406626	-4.92284	8.52957e-07	1.01148e-05		AT4G02100	Heat shock protein DnaJ with tetratricopeptide repeat
Medtr6g084260	-2.00481	0.338696	-5.91919	3.23529e-09	6.52478e-08
Medtr8g086460	-2.00677	0.580219	-3.45863	0.000542921	0.00294601	PF05097(Protein of unknown function (DUF688))	AT5G45850	Protein of unknown function (DUF688)
Medtr5g015720	-2.00699	0.66297	-3.02727	0.00246777	0.01081	PF00332(Glycosyl hydrolases family 17), PF07983(X8 domain)	AT5G67460	O-Glycosyl hydrolases family 17 protein
Medtr4g093080	-2.00821	0.614365	-3.26875	0.00108023	0.00531385	PF00011(Hsp20/alpha crystallin family), PF00069(Protein kinase domain), PF00139(Legume lectin domain)	AT5G10530	Concanavalin A-like lectin protein kinase family protein
Medtr1g050385	-2.00843	0.469821	-4.27489	1.91235e-05	0.000159342	PF01814(Hemerythrin HHE cation binding domain)	AT3G54290
Medtr3g091380	-2.01263	0.29644	-6.78932	1.12662e-11	3.67399e-10	PF04043(Plant invertase/pectin methylesterase inhibitor), PF01095(Pectinesterase)	AT3G49220	Plant invertase/pectin methylesterase inhibitor superfamily
Medtr8g104990	-2.01317	0.265262	-7.58937	3.21471e-14	1.7997e-12	PF01657(Salt stress response/antifungal)	AT2G01660	plasmodesmata-located protein 6
MT4Noble_013136	-2.01477	0.682146	-2.95358	0.00314108	0.0132214
Medtr1g033100	-2.0154	0.385356	-5.22997	1.69534e-07	2.3541e-06	PF01190(Pollen proteins Ole e I like), PF04554(Extensin-like region)
Medtr5g083970	-2.0171	0.564376	-3.57403	0.000351533	0.00202669		AT4G25850	OSBP(oxysterol binding protein)-related protein 4B
Medtr7g033755	-2.0197	0.538498	-3.75061	0.000176402	0.00111138	PF00401(ATP synthase, Delta/Epsilon chain, long alpha-helix domain), PF02823(ATP synthase, Delta/Epsilon chain, beta-sandwich domain), PF00006(ATP synthase alpha/beta family, nucleotide-binding domain), PF02874(ATP synthase alpha/beta family, beta-barrel domain), PF00306(ATP synthase alpha/beta chain, C terminal domain)	ATCG00480	ATP synthase subunit beta
Medtr1g038260	-2.02153	0.612975	-3.29789	0.00097414	0.00486427		AT2G41610
Medtr7g075890	-2.02485	0.364672	-5.55254	2.81548e-08	4.64915e-07	PF05922(Peptidase inhibitor I9), PF00082(Subtilase family)	AT4G00230	xylem serine peptidase 1
Medtr1g093900	-2.02731	0.764417	-2.65209	0.00799944	0.0286521	PF00560(Leucine Rich Repeat)	AT1G68780	RNI-like superfamily protein
Medtr7g016780	-2.02778	0.475444	-4.26502	1.99887e-05	0.000165666	PF02797(Chalcone and stilbene synthases, C-terminal domain), PF00195(Chalcone and stilbene synthases, N-terminal domain)	AT5G13930	Chalcone and stilbene synthase family protein
Medtr3g461450	-2.02947	0.815679	-2.48808	0.0128435	0.0423532
Medtr7g103440	-2.0296	0.604976	-3.35484	0.000794099	0.00408464	PF00069(Protein kinase domain), PF00560(Leucine Rich Repeat)	AT2G36570	Leucine-rich repeat protein kinase family protein
Medtr2g100880	-2.03135	0.378185	-5.37132	7.81643e-08	1.16608e-06	PF01627(Hpt domain)	AT3G16360	HPT phosphotransmitter 4
Medtr2g082650	-2.03257	0.31599	-6.43238	1.25619e-10	3.38048e-09	PF01501(Glycosyl transferase family 8)	AT5G54690	galacturonosyltransferase 12
Medtr2g096830	-2.03667	0.465415	-4.37603	1.2086e-05	0.000106786	PF01490(Transmembrane amino acid transporter protein)	AT5G40780	lysine histidine transporter 1
Medtr7g089090	-2.04115	0.399791	-5.10554	3.29844e-07	4.28781e-06		AT2G40820
Medtr6g452990	-2.04299	0.33733	-6.05635	1.39248e-09	3.02236e-08	PF00183(Hsp90 protein), PF02518(Histidine kinase-, DNA gyrase B-, and HSP90-like ATPase)	AT5G52640	heat shock protein 90.1
Medtr7g090180	-2.04323	0.151471	-13.4892	1.81019e-41	3.68721e-38	PF08241(Methyltransferase domain)	AT2G41380	S-adenosyl-L-methionine-dependent methyltransferases superfamily protein
Medtr2g091325	-2.04383	0.786032	-2.60019	0.00931732	0.0325955		AT5G41790	COP1-interactive protein 1
Medtr2g100620	-2.05247	0.178801	-11.4791	1.68039e-30	1.14094e-27	PF00657(GDSL-like Lipase/Acylhydrolase)	AT3G16370	GDSL-like Lipase/Acylhydrolase superfamily protein
Medtr8g081040	-2.05348	0.363361	-5.65135	1.59195e-08	2.78617e-07	PF00722(Glycosyl hydrolases family 16), PF06955(Xyloglucan endo-transglycosylase (XET) C-terminus)	AT3G23730	xyloglucan endotransglucosylase/hydrolase 16
Medtr7g010650	-2.0535	0.360414	-5.69762	1.21495e-08	2.17377e-07	PF00230(Major intrinsic protein)	AT5G37820	NOD26-like intrinsic protein 4;2
Medtr4g075333	-2.05625	0.479087	-4.29201	1.77059e-05	0.000149031	PF01190(Pollen proteins Ole e I like)	AT2G21140	proline-rich protein 2
Medtr2g088770	-2.06014	0.579716	-3.55371	0.000379838	0.00216863	PF00141(Peroxidase)	AT4G11290	Peroxidase superfamily protein
Medtr4g005750	-2.06132	0.216542	-9.51925	1.74436e-21	3.20768e-19	PF00501(AMP-binding enzyme)	AT3G21240	4-coumarate:CoA ligase 2
Medtr3g062030	-2.06388	0.742738	-2.77874	0.00545695	0.0209542	PF00464(Serine hydroxymethyltransferase)	AT1G76130	alpha-amylase-like 2
[truncated: 428 more rows]

## Sheet: 35d.21d genes
Gene ID	log2FoldChange	lfcSE	stat	pvalue	padj	Gene description	ATG ID	Annotation
Medtr7g007820	7.16948	1.58498	4.52339	6.08578e-06	3.72747e-05	PF08263(Leucine rich repeat N-terminal domain), PF00560(Leucine Rich Repeat)	AT1G45616	receptor like protein 6
Medtr5g056140	6.18518	1.27933	4.83472	1.33335e-06	9.36576e-06	PF02265(S1/P1 Nuclease)	AT1G68290	endonuclease 2
Medtr2g043030	5.77774	0.896819	6.44248	1.17534e-10	1.60166e-09	PF00847(AP2 domain)	AT1G19210	Integrase-type DNA-binding superfamily protein
Medtr3g088855	5.73343	1.23814	4.6307	3.6444e-06	2.33606e-05	PF00069(Protein kinase domain)	AT5G56790	Protein kinase superfamily protein
Medtr2g101650	5.59913	1.35732	4.12515	3.70492e-05	0.000192982	PF00854(POT family)	AT1G52190	Major facilitator superfamily protein
Medtr1g013410	5.59639	1.50776	3.71173	0.000205848	0.000909147		AT4G31730	glutamine dumper 1
Medtr6g088810	5.54773	1.1221	4.94404	7.65207e-07	5.63176e-06	PF01095(Pectinesterase)	AT5G19730	Pectin lyase-like superfamily protein
Medtr1g011600	5.52633	1.37665	4.01433	5.96147e-05	0.00029718	PF03171(2OG-Fe(II) oxygenase superfamily)	AT1G52820	2-oxoglutarate (2OG) and Fe(II)-dependent oxygenase superfamily protein
Medtr5g064950	5.45306	1.61932	3.36749	0.000758557	0.00292028	PF00010(Helix-loop-helix DNA-binding domain)	AT1G72210	basic helix-loop-helix (bHLH) DNA-binding superfamily protein
Medtr4g125620	5.30071	1.30721	4.05498	5.01383e-05	0.000254452		AT3G42800
Medtr2g043020	5.18888	0.867368	5.98233	2.19964e-09	2.47953e-08	PF00847(AP2 domain)	AT1G19210	Integrase-type DNA-binding superfamily protein
Medtr5g040490	5.15375	1.8955	2.71894	0.00654914	0.0193732	PF01582(TIR domain), PF00931(NB-ARC domain)	AT5G17680	disease resistance protein (TIR-NBS-LRR class), putative
Medtr3g026330	5.13342	1.54603	3.32038	0.000898938	0.0033927		AT5G09530	hydroxyproline-rich glycoprotein family protein
Medtr5g071410	5.05618	0.993322	5.09017	3.57741e-07	2.78234e-06
Medtr5g045710	4.84866	1.27691	3.79718	0.000146354	0.000668358	PF00107(Zinc-binding dehydrogenase), PF08240(Alcohol dehydrogenase GroES-like domain)	AT4G22110	GroES-like zinc-binding dehydrogenase family protein
Medtr4g068860	4.84592	0.874514	5.54127	3.00278e-08	2.81567e-07	PF00042(Globin)	AT2G16060	hemoglobin 1
Medtr4g070370	4.81109	1.803	2.66839	0.0076216	0.0220854	PF05368(NmrA-like family)	AT4G39230	NmrA-like negative transcriptional regulator family protein
Medtr1g054750	4.80285	1.74344	2.75481	0.00587269	0.0176265	PF00582(Universal stress protein family)	AT3G11930	Adenine nucleotide alpha hydrolases-like superfamily protein
Medtr1g103420	4.74226	1.94596	2.43698	0.0148105	0.0390385	PF00234(Protease inhibitor/seed storage/LTP family)	AT1G05450	Bifunctional inhibitor/lipid-transfer protein/seed storage 2S albumin superfamily protein
Medtr2g043040	4.71341	0.846861	5.56574	2.61043e-08	2.47415e-07	PF00847(AP2 domain)	AT1G19210	Integrase-type DNA-binding superfamily protein
Medtr5g045770	4.57211	0.325958	14.0267	1.07059e-44	3.94497e-42	PF00067(Cytochrome P450)	AT4G31500	cytochrome P450, family 83, subfamily B, polypeptide 1
Medtr3g435150	4.54946	0.57501	7.91198	2.53334e-15	6.40807e-14	PF02365(No apical meristem (NAM) protein)	AT5G61430	NAC domain containing protein 100
Medtr4g063865	4.52467	1.47865	3.06	0.0022134	0.00751805
Medtr7g069980	4.51032	0.602328	7.48814	6.98541e-14	1.48347e-12	PF00210(Ferritin-like domain)	AT5G01600	ferretin 1
Medtr5g031610	4.47271	1.30073	3.43862	0.000584697	0.00232046	PF00011(Hsp20/alpha crystallin family)	AT4G25200	mitochondrion-localized small heat shock protein 23.6
Medtr1g075540	4.44704	0.417303	10.6566	1.62384e-26	1.40123e-24	PF04117(Mpv17 / PMP22 family )	AT4G14305	Peroxisomal membrane 22 kDa (Mpv17/PMP22) family protein
Medtr7g012040	4.40326	1.71742	2.56388	0.0103509	0.0287567	PF00891(O-methyltransferase), PF08100(Dimerisation domain)	AT5G54160	O-methyltransferase 1
Medtr5g018480	4.35791	1.42353	3.06134	0.00220348	0.00748902	PF00067(Cytochrome P450)	AT4G31940	cytochrome P450, family 82, subfamily C, polypeptide 4
Medtr1g019590	4.24899	0.785412	5.40989	6.30629e-08	5.58856e-07
Medtr7g005930	4.22449	1.43547	2.94293	0.00325125	0.0105366	PF00854(POT family)	AT5G19640	Major facilitator superfamily protein
Medtr6g005310	4.2175	1.59385	2.64611	0.00814223	0.0233585	PF00190(Cupin)	AT5G39120	RmlC-like cupins superfamily protein
Medtr1g090737	4.18851	1.36296	3.07309	0.00211852	0.00723092	PF00501(AMP-binding enzyme)	AT1G20510	OPC-8:0 CoA ligase1
Medtr1g007830	4.18291	1.36503	3.06433	0.00218155	0.00742653		AT4G27790	Calcium-binding EF hand family protein
Medtr7g009790	4.02188	0.344072	11.689	1.45009e-31	1.89191e-29	PF08263(Leucine rich repeat N-terminal domain), PF00560(Leucine Rich Repeat)	AT3G05650	receptor like protein 32
Medtr3g024520	4.00532	0.616501	6.49686	8.20119e-11	1.13981e-09	PF00067(Cytochrome P450)	AT5G07990	Cytochrome P450 superfamily protein
Medtr5g019580	3.97738	0.441179	9.01535	1.96245e-19	8.34824e-18	PF00201(UDP-glucoronosyl and UDP-glucosyl transferase)	AT3G50740	UDP-glucosyl transferase 72E1
Medtr2g082590	3.95095	0.476201	8.29681	1.06941e-16	3.22575e-15	PF00085(Thioredoxin)	AT1G11530	C-terminal cysteine residue is changed to a serine 1
MT4Noble_028814	3.93505	1.52122	2.58677	0.00968789	0.0271947
Medtr8g103880	3.91989	1.46845	2.66941	0.00759853	0.0220258	PF00026(Eukaryotic aspartyl protease)	AT1G25510	Eukaryotic aspartyl protease family protein
MT4Noble_019758	3.91252	1.4685	2.66429	0.00771503	0.022309
Medtr3g091660	3.82194	1.49139	2.56267	0.0103869	0.0288482	PF08378(Nuclease-related domain)	AT1G65020
Medtr7g105660	3.78992	1.03469	3.66285	0.000249423	0.00108128		AT1G79000	histone acetyltransferase of the CBP family 1
Medtr1g115190	3.77095	1.44689	2.60624	0.00915425	0.0258538	PF11744(Aluminium activated malate transporter)	AT4G17970	aluminum-activated, malate transporter 12
Medtr3g034130	3.75333	1.22496	3.06405	0.0021836	0.00743258	PF00646(F-box domain)	AT3G23880	F-box and associated interaction domains-containing protein
Medtr3g021430	3.74448	0.76447	4.89815	9.6745e-07	6.97526e-06	PF00891(O-methyltransferase), PF08100(Dimerisation domain)	AT5G54160	O-methyltransferase 1
Medtr3g115300	3.7355	1.31932	2.83137	0.00463484	0.0143454		AT5G42330
Medtr3g101960	3.70592	0.511233	7.24899	4.19893e-13	8.12607e-12	PF02458(Transferase family)	AT5G42830	HXXXD-type acyl-transferase family protein
Medtr1g113760	3.68302	1.36597	2.69626	0.00701232	0.0205494		AT3G18670	Ankyrin repeat family protein
Medtr5g035240	3.66444	1.10383	3.31976	0.000900951	0.00339982	PF00931(NB-ARC domain)	AT3G14470	NB-ARC domain-containing disease resistance protein
Medtr2g068760	3.65592	0.747179	4.89296	9.93304e-07	7.14466e-06	PF03195(Protein of unknown function DUF260)	AT1G31320	LOB domain-containing protein 4
Medtr1g102810	3.63717	0.421698	8.62506	6.40595e-18	2.27741e-16	PF00504(Chlorophyll A-B binding protein)	AT3G22840	Chlorophyll A-B binding family protein
Medtr2g075780	3.60288	0.290991	12.3814	3.29489e-35	5.51703e-33	PF07722(Peptidase C26)	AT1G78680	gamma-glutamyl hydrolase 2
Medtr3g086880	3.57298	0.949541	3.76285	0.000167988	0.000756763	PF01764(Lipase (class 3))	AT5G67050	alpha/beta-Hydrolases superfamily protein
Medtr2g023810	3.56603	1.50562	2.36849	0.0178611	0.0456539		AT4G04480
Medtr8g058780	3.54069	0.526749	6.72178	1.79517e-11	2.74695e-10	PF06325(Ribosomal protein L11 methyltransferase (PrmA))	AT5G53920	ribosomal protein L11 methyltransferase-related
Medtr7g090420	3.53806	1.33828	2.64374	0.00819963	0.023491
Medtr4g020470	3.50882	1.40772	2.49255	0.012683	0.0342722	PF01912(eIF-6 family)	AT3G55620	Translation initiation factor IF6
Medtr3g049150	3.46072	0.4313	8.02393	1.02418e-15	2.69569e-14	PF02458(Transferase family)	AT2G19070	spermidine hydroxycinnamoyl transferase
Medtr8g061260	3.43372	0.515013	6.66723	2.6067e-11	3.87988e-10	PF06325(Ribosomal protein L11 methyltransferase (PrmA))	AT5G53920	ribosomal protein L11 methyltransferase-related
Medtr1g027170	3.42716	0.784082	4.37092	1.23725e-05	7.1296e-05
Medtr2g008110	3.41866	0.574968	5.94582	2.7507e-09	3.05898e-08	PF01988(VIT family)	AT3G43660	Vacuolar iron transporter (VIT) family protein
Medtr2g089530	3.35928	0.847051	3.96585	7.31334e-05	0.000357192		AT4G28100
Medtr2g023100	3.33144	1.33292	2.49936	0.0124418	0.0337088	PF00249(Myb-like DNA-binding domain)	AT2G46410	Homeodomain-like superfamily protein
Medtr8g076910	3.31419	0.866473	3.82492	0.000130817	0.000603825	PF01582(TIR domain), PF00931(NB-ARC domain)	AT5G17680	disease resistance protein (TIR-NBS-LRR class), putative
Medtr2g100450	3.30859	0.661712	5.00005	5.73146e-07	4.30776e-06	PF00069(Protein kinase domain), PF00560(Leucine Rich Repeat)	AT4G29990	Leucine-rich repeat transmembrane protein kinase protein
Medtr8g083520	3.30796	0.367038	9.01259	2.01249e-19	8.54774e-18	PF00171(Aldehyde dehydrogenase family)	AT3G24503	aldehyde dehydrogenase 2C4
Medtr0094s0110	3.30236	0.852577	3.87339	0.000107331	0.00050618
Medtr8g076290	3.29027	0.238775	13.7798	3.3735e-43	1.04533e-40	PF00067(Cytochrome P450)	AT4G36220	ferulic acid 5-hydroxylase 1
Medtr0119s0020	3.26342	0.414421	7.87464	3.41731e-15	8.53327e-14	PF01988(VIT family)	AT3G43660	Vacuolar iron transporter (VIT) family protein
Medtr1g102830	3.26221	0.468474	6.96348	3.3197e-12	5.59812e-11	PF00504(Chlorophyll A-B binding protein)	AT3G22840	Chlorophyll A-B binding family protein
Medtr4g068380	3.24829	1.35723	2.39333	0.0166963	0.0431623
Medtr1g037680	3.24498	0.296303	10.9516	6.53093e-28	6.27061e-26	PF00085(Thioredoxin)	AT3G06730	Thioredoxin z
Medtr5g015840	3.24219	0.346708	9.35134	8.65469e-21	4.29084e-19	PF10343(Potential Queuosine, Q, salvage protein family)
Medtr0119s0010	3.24194	0.397519	8.15543	3.4795e-16	9.74117e-15	PF01988(VIT family)	AT3G43660	Vacuolar iron transporter (VIT) family protein
Medtr2g023760	3.23878	1.28383	2.52274	0.0116443	0.0318646		AT4G22030	F-box family protein with a domain of unknown function (DUF295)
Medtr7g109290	3.22902	1.2191	2.64869	0.00808045	0.0232179	PF12023(Domain of unknown function (DUF3511))	AT3G62640	Protein of unknown function (DUF3511)
Medtr6g023665	3.18943	0.977283	3.26356	0.00110021	0.00405961	PF00201(UDP-glucoronosyl and UDP-glucosyl transferase)	AT1G01420	UDP-glucosyl transferase 72B3
Medtr5g019610	3.16448	1.22437	2.58458	0.0097499	0.0273491
Medtr1g045610	3.15632	0.749528	4.21108	2.54157e-05	0.000137398	PF00249(Myb-like DNA-binding domain)	AT3G24310	myb domain protein 305
Medtr1g081420	3.10131	0.847078	3.66119	0.000251051	0.00108799	PF00383(Cytidine and deoxycytidylate deaminase zinc-binding region)	AT5G28050	Cytidine/deoxycytidylate deaminase family protein
Medtr4g063500	3.0984	0.557846	5.55422	2.78853e-08	2.62833e-07	PF00903(Glyoxalase/Bleomycin resistance protein/Dioxygenase superfamily)	AT1G07645	dessication-induced 1VOC superfamily protein
Medtr1g050145	3.07335	0.844284	3.64019	0.000272439	0.00117304	PF01535(PPR repeat)	AT1G66345	Pentatricopeptide repeat (PPR) superfamily protein
Medtr4g094550	3.06951	0.560176	5.47955	4.26405e-08	3.89094e-07	PF07712(Stress up-regulated Nod 19)	AT5G61820
Medtr2g082880	3.06822	1.10718	2.77119	0.00558511	0.0168449	PF00646(F-box domain), PF08387(FBD)	AT5G44490	FBD, F-box, Skp2-like and Leucine Rich Repeat domains containing protein
Medtr6g071475	3.06553	0.445371	6.88309	5.85694e-12	9.58852e-11	PF12146(Serine aminopeptidase, S33)	AT1G73480	alpha/beta-Hydrolases superfamily protein
Medtr4g051000	3.03335	0.843931	3.59431	0.000325257	0.00137399		AT4G28100
Medtr1g073860	3.02603	0.976307	3.09947	0.00193869	0.00669323	PF03479(Domain of unknown function (DUF296))	AT4G14465	AT-hook motif nuclear-localized protein 20
Medtr4g036150	2.99439	0.957232	3.12818	0.00175893	0.0061506		AT4G13010	Oxidoreductase, zinc-binding dehydrogenase family protein
Medtr2g105800	2.98916	1.12968	2.64602	0.00814458	0.0233628		AT3G03280
Medtr5g007460	2.97617	0.407481	7.30383	2.79696e-13	5.53465e-12	PF00067(Cytochrome P450)	AT2G45550	cytochrome P450, family 76, subfamily C, polypeptide 4
Medtr5g016090	2.97479	1.21684	2.44469	0.0144977	0.0383438		AT4G33910	2-oxoglutarate (2OG) and Fe(II)-dependent oxygenase superfamily protein
Medtr8g099975	2.97081	0.878106	3.3832	0.00071646	0.00277822
Medtr7g079370	2.9681	1.19657	2.4805	0.0131197	0.0352218	PF07734(F-box associated)	AT4G12560	F-box and associated interaction domains-containing protein
Medtr8g010530	2.96426	0.722613	4.10214	4.09348e-05	0.000211364	PF03094(Mlo family)	AT4G02600	Seven transmembrane MLO family protein
Medtr2g029750	2.95888	1.13217	2.61345	0.00896331	0.0253934	PF00141(Peroxidase)	AT2G38380	Peroxidase superfamily protein
Medtr3g054330	2.94726	0.584387	5.04333	4.5749e-07	3.49435e-06	PF03492(SAM dependent carboxyl methyltransferase)	AT5G55250	IAA carboxylmethyltransferase 1
Medtr7g075620	2.92637	0.734804	3.98252	6.81881e-05	0.000335805
Medtr4g124910	2.91329	0.173591	16.7825	3.2786e-63	4.96671e-60	PF00166(Chaperonin 10 Kd subunit)	AT5G20720	chaperonin 20
Medtr2g013010	2.89145	0.572671	5.04906	4.4398e-07	3.40451e-06	PF12143(Protein of unknown function (DUF_B2219)), PF00264(Common central domain of tyrosinase), PF12142(Polyphenol oxidase middle domain)
Medtr1g069620	2.88977	1.10016	2.62667	0.00862245	0.024563		AT5G49830	exocyst complex component 84B
Medtr2g010580	2.8813	0.691533	4.16654	3.09257e-05	0.000164094	PF00188(Cysteine-rich secretory protein family)	AT4G33720	CAP (Cysteine-rich secretory proteins, Antigen 5, and Pathogenesis-related 1 protein) superfamily protein
Medtr7g035095	2.88107	0.333817	8.63068	6.09877e-18	2.17104e-16		AT5G62960
Medtr1g099470	2.87606	0.79866	3.60111	0.000316862	0.00134123	PF00004(ATPase family associated with various cellular activities (AAA))	AT4G28000	P-loop containing nucleoside triphosphate hydrolases superfamily protein
Medtr4g023570	2.87295	1.1783	2.43821	0.01476	0.0389129	PF00646(F-box domain)	AT5G24560	phloem protein 2-B12
Medtr3g117690	2.8487	0.710108	4.01164	6.02995e-05	0.000300264	PF04833(COBRA-like protein)	AT3G29810	COBRA-like protein 2 precursor
Medtr7g009670	2.84728	0.354029	8.04248	8.80365e-16	2.3512e-14	PF01081(KDPG and KHG aldolase)
Medtr5g007450	2.83703	0.485541	5.84303	5.12592e-09	5.42389e-08	PF00067(Cytochrome P450)	AT2G45550	cytochrome P450, family 76, subfamily C, polypeptide 4
Medtr5g085580	2.83187	0.431289	6.56606	5.16629e-11	7.36406e-10	PF07983(X8 domain), PF00332(Glycosyl hydrolases family 17)	AT2G05790	O-Glycosyl hydrolases family 17 protein
Medtr2g064400	2.83143	0.352937	8.02248	1.03629e-15	2.72493e-14	PF00646(F-box domain)	AT3G60790	F-box family protein
MT4Noble_019329	2.82825	1.01162	2.79578	0.0051775	0.0157867
Medtr7g087430	2.82566	1.17819	2.39831	0.0164709	0.0426645	PF01554(MatE)	AT1G33110	MATE efflux family protein
Medtr1g037580	2.8235	0.60501	4.66686	3.05845e-06	1.99564e-05	PF00067(Cytochrome P450)	AT2G29090	cytochrome P450, family 707, subfamily A, polypeptide 2
Medtr7g105670	2.81886	0.880669	3.20081	0.00137041	0.00493573
Medtr4g025940	2.80501	0.379571	7.38996	1.46868e-13	3.00211e-12	PF00067(Cytochrome P450)	AT3G26330	cytochrome P450, family 71, subfamily B, polypeptide 37
Medtr4g025950	2.80089	0.374016	7.4887	6.9557e-14	1.47832e-12	PF00067(Cytochrome P450)	AT4G31500	cytochrome P450, family 83, subfamily B, polypeptide 1
Medtr4g118355	2.79806	0.321005	8.71656	2.86773e-18	1.05815e-16	PF02896(PEP-utilising enzyme, TIM barrel domain)	AT4G15530	pyruvate orthophosphate dikinase
Medtr7g110580	2.78408	0.37248	7.47443	7.75367e-14	1.6377e-12		AT1G75250	RAD-like 6
Medtr0056s0160	2.76986	0.839639	3.29887	0.000970751	0.00363405	PF03171(2OG-Fe(II) oxygenase superfamily)	AT1G17020	senescence-related gene 1
Medtr3g073030	2.76778	0.848153	3.26331	0.00110119	0.00406159
Medtr7g077180	2.75197	0.707458	3.88995	0.000100267	0.000475822	PF00228(Bowman-Birk serine protease inhibitor family)
Medtr1g079760	2.73891	0.576967	4.74708	2.06371e-06	1.39428e-05	PF00909(Ammonium Transporter Family)	AT1G64780	ammonium transporter 1;2
Medtr6g036450	2.73474	0.331206	8.25691	1.49489e-16	4.4259e-15	PF00892(EamA-like transporter family)	AT1G43650	nodulin MtN21 /EamA-like transporter family protein
Medtr3g063310	2.72402	0.290993	9.3611	7.89131e-21	3.93382e-19	PF03168(Late embryogenesis abundant protein)	AT1G65690	Late embryogenesis abundant (LEA) hydroxyproline-rich glycoprotein family
Medtr2g043050	2.72029	0.675972	4.02426	5.71555e-05	0.0002856	PF00847(AP2 domain)	AT1G19210	Integrase-type DNA-binding superfamily protein
Medtr3g013770	2.69784	0.762142	3.53981	0.000400409	0.0016553	PF00646(F-box domain), PF07734(F-box associated)	AT3G23880	F-box and associated interaction domains-containing protein
Medtr2g040360	2.69351	1.09789	2.45335	0.0141534	0.0375678	PF00560(Leucine Rich Repeat)	AT4G16890	disease resistance protein (TIR-NBS-LRR class), putative
Medtr5g033510	2.68888	1.07504	2.5012	0.0123773	0.0335591	PF04864(Allinase)	AT1G70560	tryptophan aminotransferase of Arabidopsis 1
Medtr5g023120	2.68639	1.14995	2.33609	0.0194865	0.0491543	PF08137(DVL family)	AT4G35783	ROTUNDIFOLIA like 6
Medtr5g004830	2.68636	0.8818	3.04645	0.00231561	0.0078311
Medtr2g094020	2.6813	0.654953	4.09389	4.24202e-05	0.000218124	PF01301(Glycosyl hydrolases family 35), PF02140(Galactose binding lectin domain), PF02837(Glycosyl hydrolases family 2, sugar binding domain)	AT2G28470	beta-galactosidase 8
Medtr3g115600	2.67595	0.309161	8.65551	4.90714e-18	1.76295e-16	PF00724(NADH:flavin oxidoreductase / NADH oxidase family)	AT1G76680	12-oxophytodienoate reductase 1
Medtr5g043880	2.66983	0.28404	9.39949	5.48296e-21	2.76357e-19	PF03106(WRKY DNA -binding domain)	AT1G69310	WRKY DNA-binding protein 57
Medtr8g028440	2.62812	1.02958	2.55263	0.0106913	0.0295971
Medtr5g006770	2.61406	1.00256	2.60739	0.00912355	0.0257858
Medtr6g043240	2.60663	1.03472	2.51917	0.0117633	0.0321405	PF00141(Peroxidase)	AT1G71695	Peroxidase superfamily protein
Medtr1g014510	2.60016	0.28427	9.14681	5.86402e-20	2.665e-18	PF00892(EamA-like transporter family)	AT5G40240	nodulin MtN21 /EamA-like transporter family protein
Medtr2g022560	2.59675	0.373368	6.95492	3.52752e-12	5.92292e-11	PF03005()	AT3G06080	Plant protein of unknown function (DUF828)
Medtr4g108760	2.59615	0.291077	8.91911	4.70043e-19	1.92161e-17	PF02365(No apical meristem (NAM) protein)	AT5G61430	NAC domain containing protein 100
Medtr7g020980	2.5799	0.305331	8.44951	2.92533e-17	9.55304e-16	PF00847(AP2 domain)	AT5G13330	related to AP2 6l
Medtr4g100610	2.56328	1.03146	2.48511	0.0129512	0.0348759	PF03171(2OG-Fe(II) oxygenase superfamily)	AT4G16770	2-oxoglutarate (2OG) and Fe(II)-dependent oxygenase superfamily protein
Medtr5g061740	2.56114	0.831016	3.08194	0.00205655	0.00704852	PF01486(K-box region), PF00319(SRF-type transcription factor (DNA-binding and dimerisation domain))	AT1G22130	AGAMOUS-like 104
Medtr1g016170	2.55183	0.24942	10.2311	1.4392e-24	1.02465e-22	PF00320(GATA zinc finger)	AT5G56860	GATA type zinc finger transcription factor family protein
Medtr3g065080	2.54874	0.411633	6.19177	5.9492e-10	7.33376e-09	PF04564(U-box domain)	AT5G37490	ARM repeat superfamily protein
Medtr7g112560	2.53144	0.568781	4.45064	8.56134e-06	5.09384e-05	PF00646(F-box domain)	AT1G09155	phloem protein 2-B15
Medtr3g463730	2.52617	0.362644	6.96597	3.26147e-12	5.50673e-11	PF00909(Ammonium Transporter Family)	AT1G64780	ammonium transporter 1;2
Medtr7g109440	2.51438	0.88155	2.85222	0.00434147	0.0135434
Medtr4g050130	2.50859	0.366316	6.84816	7.48072e-12	1.20345e-10		AT3G11690
Medtr1g036490	2.4976	0.30655	8.14747	3.71617e-16	1.03718e-14	PF00891(O-methyltransferase), PF08100(Dimerisation domain)	AT5G54160	O-methyltransferase 1
Medtr5g019010	2.49607	1.03991	2.40026	0.0163832	0.0424938	PF00067(Cytochrome P450)	AT3G26300	cytochrome P450, family 71, subfamily B, polypeptide 34
Medtr2g055920	2.49562	0.634286	3.93454	8.33554e-05	0.000401863		AT5G43970	translocase of outer membrane 22-V
Medtr6g027730	2.49326	0.705793	3.53257	0.000411535	0.00169744	PF07847(Protein of unknown function (DUF1637))	AT5G39890	Protein of unknown function (DUF1637)
Medtr0131s0030	2.48049	0.404747	6.1285	8.87115e-10	1.06096e-08
Medtr1g035190	2.47956	0.613413	4.04223	5.29462e-05	0.000267344	PF00067(Cytochrome P450)	AT3G26320	cytochrome P450, family 71, subfamily B, polypeptide 36
Medtr3g058390	2.47883	0.509623	4.86404	1.15012e-06	8.15427e-06	PF00067(Cytochrome P450)	AT3G26310	cytochrome P450, family 71, subfamily B, polypeptide 35
Medtr5g083500	2.47748	0.694271	3.56847	0.000359077	0.00150059		AT2G40390
Medtr3g015420	2.47132	0.587276	4.2081	2.57523e-05	0.00013908
Medtr1g115220	2.4696	0.847125	2.91527	0.00355376	0.0113964	PF00505(HMG (high mobility group) box)	AT5G23420	high-mobility group box 6
Medtr7g021010	2.46936	1.01892	2.4235	0.0153716	0.0402877	PF00847(AP2 domain)	AT5G13330	related to AP2 6l
Medtr6g009510	2.46665	0.684479	3.60369	0.000313732	0.00133046	PF00004(ATPase family associated with various cellular activities (AAA))	AT5G40010	AAA-ATPase 1
Medtr1g100763	2.46414	0.96506	2.55335	0.0106692	0.0295509	PF07734(F-box associated), PF00646(F-box domain)	AT2G04920	F-box and associated interaction domains-containing protein
Medtr4g098610	2.45962	0.938251	2.62149	0.00875458	0.02489	PF11744(Aluminium activated malate transporter)	AT4G17970	aluminum-activated, malate transporter 12
Medtr3g078860	2.45623	0.191285	12.8407	9.70021e-38	1.98876e-35	PF02777(Iron/manganese superoxide dismutases, C-terminal domain), PF00081(Iron/manganese superoxide dismutases, alpha-hairpin domain)	AT5G23310	Fe superoxide dismutase 3
Medtr7g093090	2.45585	1.01548	2.41841	0.0155883	0.040746	PF08743(Nse4 C-terminal)	AT1G51130	Nse4, component of Smc5/6 DNA repair complex
Medtr3g032520	2.45384	0.555837	4.41468	1.01158e-05	5.94094e-05		AT1G06010
Medtr5g035170	2.44957	0.82325	2.97549	0.00292524	0.00960105
Medtr3g087325	2.44849	0.802655	3.05049	0.00228465	0.0077379	PF00168(C2 domain)	AT5G10210
Medtr4g126160	2.44555	0.414182	5.90454	3.53634e-09	3.86333e-08	PF01565(FAD binding domain ), PF09265(Cytokinin dehydrogenase 1, FAD and cytokinin binding)	AT5G56970	cytokinin oxidase 3
MT4Noble_055127	2.44478	0.628222	3.89158	9.95932e-05	0.000472955
Medtr5g033320	2.44432	0.516533	4.73216	2.22138e-06	1.49194e-05	PF00664(ABC transporter transmembrane region), PF00005(ABC transporter)	AT3G13080	multidrug resistance-associated protein 3
Medtr1g047620	2.44382	0.706144	3.46079	0.000538588	0.00215783
Medtr4g032865	2.43989	0.556691	4.38284	1.17142e-05	6.78036e-05	PF02428(Potato type II proteinase inhibitor family)	AT1G72060	serine-type endopeptidase inhibitors
Medtr2g435490	2.43521	0.48568	5.01402	5.33041e-07	4.02854e-06	PF00188(Cysteine-rich secretory protein family)	AT2G14610	pathogenesis-related gene 1
Medtr2g023660	2.43286	0.708009	3.4362	0.000589945	0.00233953		AT4G22030	F-box family protein with a domain of unknown function (DUF295)
MT4Noble_035377	2.427	0.485362	5.0004	5.72119e-07	4.30122e-06
Medtr6g009320	2.42344	1.00835	2.40338	0.0162445	0.0422143		AT3G28420	Putative membrane lipoprotein
Medtr2g055430	2.41648	0.568394	4.25142	2.12418e-05	0.000116286	PF00067(Cytochrome P450)	AT3G14690	cytochrome P450, family 72, subfamily A, polypeptide 15
Medtr3g105375	2.40965	0.744351	3.23726	0.00120685	0.00440778
Medtr5g075650	2.40905	0.378423	6.36601	1.94005e-10	2.56802e-09	PF00560(Leucine Rich Repeat), PF00069(Protein kinase domain)	AT1G06840	Leucine-rich repeat protein kinase family protein
Medtr6g015965	2.4019	0.182494	13.1615	1.4613e-39	3.68951e-37		AT5G15802
Medtr1g088430	2.37677	0.185208	12.833	1.07161e-37	2.18065e-35	PF01699(Sodium/calcium exchanger protein)	AT2G47600	magnesium/proton exchanger
Medtr6g038760	2.3675	0.927124	2.55359	0.0106618	0.0295333	PF00560(Leucine Rich Repeat)	AT2G34930	disease resistance family protein / LRR family protein
Medtr2g031590	2.3535	0.70363	3.3448	0.000823415	0.00313983	PF01565(FAD binding domain ), PF08031(Berberine and berberine like )	AT1G30700	FAD-binding Berberine family protein
Medtr3g117825	2.35277	0.681091	3.45441	0.000551499	0.00220341		AT1G35515	high response to osmotic stress 10
Medtr1g064170	2.3509	0.440371	5.33844	9.37494e-08	8.08974e-07	PF01535(PPR repeat)	AT1G62720	Pentatricopeptide repeat (PPR-like) superfamily protein
Medtr3g104030	2.35054	0.27569	8.52604	1.51438e-17	5.09803e-16	PF03080(Domain of unknown function (DUF239))	AT5G25950	Protein of Unknown Function (DUF239)
Medtr2g015750	2.35054	0.395788	5.93889	2.86955e-09	3.18076e-08
Medtr1g027160	2.34982	0.651385	3.60742	0.000309255	0.00131351	PF00069(Protein kinase domain)	AT1G66980	suppressor of npr1-1 constitutive 4
Medtr7g012250	2.3484	0.373676	6.28458	3.28733e-10	4.21631e-09	PF00782(Dual specificity phosphatase, catalytic domain), PF10409(C2 domain of PTEN tumour-suppressor protein)	AT5G39400	Calcium/lipid-binding (CaLB) phosphatase
Medtr7g055660	2.34708	0.531646	4.41475	1.01127e-05	5.94042e-05	PF00856(SET domain)	AT4G02020	SET domain-containing protein
Medtr3g434790	2.34634	0.755032	3.1076	0.00188611	0.00653334	PF00685(Sulfotransferase domain)	AT3G45070	P-loop containing nucleoside triphosphate hydrolases superfamily protein
Medtr2g072400	2.3434	0.475772	4.92547	8.41593e-07	6.16234e-06	PF00067(Cytochrome P450)	AT3G14690	cytochrome P450, family 72, subfamily A, polypeptide 15
Medtr2g083920	2.34247	0.303523	7.71761	1.1853e-14	2.79834e-13	PF00226(DnaJ domain)	AT2G42750	DNAJ heat shock N-terminal domain-containing protein
Medtr3g467370	2.3348	0.409334	5.70391	1.1709e-08	1.16484e-07	PF00398(Ribosomal RNA adenine dimethylase)	AT2G47420	Ribosomal RNA adenine dimethylase family protein
Medtr8g091690	2.33407	0.469534	4.97103	6.65977e-07	4.9455e-06	PF00067(Cytochrome P450)	AT5G07990	Cytochrome P450 superfamily protein
Medtr5g070210	2.3293	0.675731	3.44709	0.000566667	0.00225575	PF01255(Putative undecaprenyl diphosphate synthase)	AT5G58770	Undecaprenyl pyrophosphate synthetase family protein
Medtr8g036830	2.32816	0.201877	11.5326	9.04156e-31	1.11559e-28
Medtr6g080680	2.32643	0.346785	6.70857	1.96537e-11	2.98395e-10	PF07734(F-box associated)	AT3G06240	F-box family protein
Medtr7g076600	2.32295	0.26107	8.8978	5.69657e-19	2.29445e-17
Medtr5g014340	2.31902	0.797314	2.90854	0.0036312	0.0116174	PF01190(Pollen proteins Ole e I like), PF02990(Endomembrane protein 70)	AT5G10840	Endomembrane protein 70 protein family
Medtr7g109920	2.31883	0.867374	2.67339	0.00750886	0.0218007	PF01501(Glycosyl transferase family 8)	AT2G47180	galactinol synthase 1
Medtr7g063280	2.31172	0.477683	4.83944	1.30204e-06	9.1623e-06
Medtr3g014240	2.30552	0.342366	6.73407	1.64977e-11	2.54014e-10	PF00085(Thioredoxin)	AT3G06730	Thioredoxin z
Medtr2g034340	2.3052	0.480598	4.79653	1.61439e-06	1.11305e-05
Medtr7g073250	2.29511	0.148679	15.4367	9.26711e-54	7.01932e-51	PF01132(Elongation factor P (EF-P) OB domain), PF09285(Elongation factor P, C-terminal), PF08207(Elongation factor P (EF-P) KOW-like domain)	AT3G08740	elongation factor P (EF-P) family protein
Medtr4g086165	2.28058	0.843925	2.70235	0.00688505	0.0202373	PF00847(AP2 domain)	AT4G34410	redox responsive transcription factor 1
Medtr7g105840	2.27862	0.145154	15.698	1.56184e-55	1.46856e-52		AT2G33180
Medtr3g066070	2.27365	0.70625	3.21933	0.00128493	0.00466419	PF00352(Transcription factor TFIID (or TATA-binding protein, TBP))	AT3G13445	TATA binding protein 1
Medtr7g092430	2.27201	0.628987	3.61217	0.000303647	0.00129151	PF00560(Leucine Rich Repeat), PF08263(Leucine rich repeat N-terminal domain), PF00069(Protein kinase domain)	AT5G06940	Leucine-rich repeat receptor-like protein kinase family protein
Medtr7g088850	2.27036	0.289629	7.83883	4.54749e-15	1.11412e-13	PF00004(ATPase family associated with various cellular activities (AAA))	AT2G03670	cell division cycle 48B
Medtr3g079610	2.26658	0.393892	5.75431	8.69946e-09	8.83818e-08
Medtr4g015050	2.26569	0.383774	5.90372	3.55398e-09	3.87485e-08	PF00931(NB-ARC domain)	AT5G36930	Disease resistance protein (TIR-NBS-LRR class) family
Medtr1g063850	2.26182	0.151873	14.8928	3.67019e-50	2.08497e-47	PF04545(Sigma-70, region 4), PF04542(Sigma-70 region 2 ), PF04539(Sigma-70 region 3)	AT2G36990	RNApolymerase sigma-subunit F
Medtr4g014970	2.25254	0.569054	3.9584	7.54539e-05	0.000367276	PF06127(Protein of unknown function (DUF962))	AT3G09085	Protein of unknown function (DUF962)
Medtr5g040900	2.25041	0.935993	2.40431	0.0162032	0.0421231	PF00931(NB-ARC domain)	AT3G14470	NB-ARC domain-containing disease resistance protein
Medtr3g064260	2.24594	0.765536	2.93381	0.00334828	0.0108138	PF03126(Plus-3 domain), PF02201(SWIB/MDM2 domain)	AT5G63700	zinc ion binding;DNA binding
Medtr8g099920	2.24526	0.318758	7.04377	1.87111e-12	3.28959e-11	PF00550(Phosphopantetheine attachment site)	AT4G25050	acyl carrier protein 4
Medtr8g094790	2.24174	0.899047	2.49347	0.0126502	0.0341971		AT4G08330
Medtr3g019120	2.23723	0.483516	4.62699	3.71015e-06	2.37429e-05	PF07714(Protein tyrosine kinase), PF03358(NADPH-dependent FMN reductase)	AT2G43230	Protein kinase superfamily protein
Medtr4g068990	2.23539	0.338226	6.60915	3.86537e-11	5.61838e-10	PF00271(Helicase conserved C-terminal domain), PF00270(DEAD/DEAH box helicase)	AT5G54910	DEA(D/H)-box RNA helicase family protein
Medtr1g075340	2.23354	0.669953	3.33388	0.000856446	0.00324852	PF00280(Potato inhibitor I family)	AT2G38870	Serine protease inhibitor, potato inhibitor I-type family protein
Medtr4g124700	2.22578	0.833047	2.67186	0.0075433	0.021889	PF02519(Auxin responsive protein)	AT5G20820	SAUR-like auxin-responsive protein family
Medtr8g041330	2.219	0.705919	3.14341	0.0016699	0.00587092	PF01633(Choline/ethanolamine kinase)	AT1G74320	Protein kinase superfamily protein
Medtr8g089190	2.21723	0.847591	2.61592	0.00889881	0.0252421	PF00067(Cytochrome P450)	AT5G36110	cytochrome P450, family 716, subfamily A, polypeptide 1
Medtr1g116580	2.21447	0.44116	5.01965	5.17653e-07	3.92312e-06		AT1G05860
Medtr6g046930	2.2003	0.331894	6.62952	3.36789e-11	4.95071e-10	PF05630(Necrosis inducing protein (NPP1)), PF00931(NB-ARC domain)	AT3G14470	NB-ARC domain-containing disease resistance protein
Medtr4g014540	2.19839	0.292837	7.50723	6.03896e-14	1.29356e-12	PF00210(Ferritin-like domain)	AT5G01600	ferretin 1
Medtr4g114320	2.19422	0.158641	13.8314	1.64824e-43	5.41498e-41	PF00153(Mitochondrial carrier protein)	AT4G32400	Mitochondrial substrate carrier family protein
Medtr4g117040	2.18697	0.401944	5.44097	5.29923e-08	4.7611e-07	PF00704(Glycosyl hydrolases family 18), PF00069(Protein kinase domain)	AT3G16030	lectin protein kinase family protein
Medtr1g043775	2.18626	0.332278	6.57962	4.71638e-11	6.75808e-10	PF03171(2OG-Fe(II) oxygenase superfamily)	AT5G59540	2-oxoglutarate (2OG) and Fe(II)-dependent oxygenase superfamily protein
Medtr3g025230	2.16241	0.350269	6.17358	6.67604e-10	8.15315e-09	PF00067(Cytochrome P450)	AT5G07990	Cytochrome P450 superfamily protein
Medtr4g104610	2.15957	0.228401	9.45518	3.22474e-21	1.64976e-19	PF00067(Cytochrome P450)	AT3G48270	cytochrome P450, family 71, subfamily A, polypeptide 26
MT4Noble_027564	2.15921	0.672794	3.20931	0.00133054	0.00480609
Medtr3g076550	2.15867	0.775569	2.78333	0.00538038	0.0163213	PF00067(Cytochrome P450)	AT3G48300	cytochrome P450, family 71, subfamily A, polypeptide 23
Medtr3g027140	2.15803	0.120166	17.9588	4.09628e-72	1.01543e-68	PF00076(RNA recognition motif. (a.k.a. RRM, RBD, or RNP domain))	AT3G52150	RNA-binding (RRM/RBD/RNP motifs) family protein
Medtr5g430430	2.15641	0.147839	14.5862	3.43969e-48	1.6455e-45
Medtr5g040430	2.15293	0.734659	2.93051	0.00338402	0.0109098	PF02798(Glutathione S-transferase, N-terminal domain)	AT5G62480	glutathione S-transferase tau 9
Medtr1g028890	2.15097	0.80903	2.6587	0.0078442	0.0226178	PF07714(Protein tyrosine kinase), PF08263(Leucine rich repeat N-terminal domain)	AT4G23740	Leucine-rich repeat protein kinase family protein
Medtr1g116890	2.15078	0.486643	4.41962	9.8875e-06	5.82064e-05	PF00067(Cytochrome P450)	AT3G52970	cytochrome P450, family 76, subfamily G, polypeptide 1
Medtr4g131380	2.13446	0.541221	3.94379	8.02025e-05	0.00038831	PF03009(Glycerophosphoryl diester phosphodiesterase family)	AT5G58170	SHV3-like 5
Medtr4g094772	2.13348	0.278051	7.673	1.68022e-14	3.86309e-13	PF00067(Cytochrome P450)	AT4G37370	cytochrome P450, family 81, subfamily D, polypeptide 8
Medtr5g030290	2.13344	0.145432	14.6696	1.00905e-48	5.09534e-46
Medtr2g023680	2.13051	0.669095	3.18417	0.00145168	0.00518733	PF00067(Cytochrome P450)	AT3G14690	cytochrome P450, family 72, subfamily A, polypeptide 15
Medtr2g030100	2.13027	0.30052	7.08862	1.3546e-12	2.43488e-11	PF05938(Plant self-incompatibility protein S1)	AT3G24060	Plant self-incompatibility protein S1 family
Medtr2g461760	2.12888	0.377675	5.63679	1.73254e-08	1.68318e-07	PF01486(K-box region)	AT5G60910	AGAMOUS-like 8
Medtr2g023830	2.12501	0.610904	3.47847	0.000504291	0.00203568		AT4G22030	F-box family protein with a domain of unknown function (DUF295)
Medtr8g445800	2.12162	0.180108	11.7797	4.96732e-32	6.63966e-30	PF11721(Di-glucose binding within endoplasmic reticulum), PF07714(Protein tyrosine kinase), PF00560(Leucine Rich Repeat)	AT1G56130	Leucine-rich repeat transmembrane protein kinase
Medtr5g092570	2.12066	0.483478	4.38626	1.15318e-05	6.68896e-05	PF00012(Hsp70 protein)	AT1G11660	heat shock protein 70 (Hsp 70) family protein
Medtr7g114020	2.11972	0.339856	6.23712	4.45703e-10	5.59807e-09	PF01627(Hpt domain)	AT1G03430	histidine-containing phosphotransfer factor 5
Medtr1g112780	2.11675	0.44466	4.76037	1.93237e-06	1.31238e-05	PF01494(FAD binding domain)	AT5G05320	FAD/NAD(P)-binding oxidoreductase family protein
Medtr3g452940	2.11602	0.762618	2.77468	0.00552558	0.0167004
Medtr7g011390	2.11007	0.559196	3.77339	0.000161041	0.00072969
Medtr7g063260	2.10556	0.257298	8.18335	2.76054e-16	7.83293e-15	PF00106(short chain dehydrogenase)	AT5G06060	NAD(P)-binding Rossmann-fold superfamily protein
Medtr5g013130	2.10149	0.777086	2.70432	0.00684444	0.0201353	PF00069(Protein kinase domain), PF01453(D-mannose binding lectin)	AT5G60900	receptor-like protein kinase 1
Medtr7g063270	2.09892	0.288389	7.2781	3.38564e-13	6.59898e-12	PF00106(short chain dehydrogenase)	AT5G06060	NAD(P)-binding Rossmann-fold superfamily protein
Medtr1g009840	2.08712	0.214611	9.72514	2.35589e-22	1.37855e-20		AT3G15000	cobalt ion binding
Medtr7g101740	2.08538	0.625533	3.33376	0.0008568	0.0032494	PF02519(Auxin responsive protein)	AT2G37030	SAUR-like auxin-responsive protein family
Medtr2g009480	2.08399	0.596458	3.49395	0.000475938	0.00193526		AT5G09530	hydroxyproline-rich glycoprotein family protein
Medtr7g017530	2.06787	0.320791	6.44617	1.14714e-10	1.56635e-09	PF01535(PPR repeat)	AT2G31400	genomes uncoupled 1
MT4Noble_026425	2.06409	0.567694	3.63593	0.000276979	0.00118921
Medtr5g073840	2.06228	0.536228	3.84591	0.000120105	0.000559835
Medtr1g111480	2.05899	0.756535	2.72161	0.00649647	0.0192445
Medtr7g086640	2.04669	0.154268	13.2671	3.59253e-40	9.24163e-38	PF01138(3' exoribonuclease family, domain 1), PF03726(Polyribonucleotide nucleotidyltransferase, RNA binding domain), PF00575(S1 RNA binding domain), PF03725(3' exoribonuclease family, domain 2), PF00013(KH domain)	AT3G03710	polyribonucleotide nucleotidyltransferase, putative
Medtr1g029500	2.04664	0.219726	9.31448	1.22547e-20	6.0209e-19		AT1G21410	F-box/RNI-like superfamily protein
Medtr8g012090	2.04377	0.596218	3.42789	0.000608284	0.00240213		AT3G06240	F-box family protein
Medtr6g018680	2.04286	0.248852	8.20911	2.22826e-16	6.42285e-15	PF00162(Phosphoglycerate kinase), PF02390(Putative methyltransferase )	AT3G12780	phosphoglycerate kinase 1
Medtr5g459550	2.04091	0.810711	2.51743	0.0118214	0.0322822
Medtr1g102780	2.03796	0.278802	7.3097	2.67738e-13	5.30572e-12	PF00504(Chlorophyll A-B binding protein)	AT3G22840	Chlorophyll A-B binding family protein
Medtr2g076320	2.03482	0.369098	5.51295	3.52865e-08	3.27499e-07	PF02536(mTERF)	AT5G07900	Mitochondrial transcription termination factor family protein
MT4Noble_014721	2.03188	0.717255	2.83286	0.00461342	0.014292
Medtr5g011990	2.03147	0.0939222	21.6293	9.52933e-104	1.29923e-99		AT1G62780
Medtr8g018110	2.02633	0.848472	2.38821	0.0169306	0.0436638		AT3G06240	F-box family protein
Medtr5g045920	2.0263	0.489023	4.14357	3.41936e-05	0.000179306	PF03031(NLI interacting factor-like phosphatase)	AT5G11860	SCP1-like small phosphatase 5
Medtr1g082430	2.02557	0.15675	12.9223	3.36836e-38	7.23216e-36		AT5G27390	Mog1/PsbP/DUF1795-like photosystem II reaction center PsbP family protein
Medtr1g094160	2.02497	0.136824	14.7998	1.46852e-49	7.85168e-47		AT3G10405
Medtr3g062790	2.01996	0.728209	2.77387	0.00553934	0.0167301	PF04983(RNA polymerase Rpb1, domain 3), PF04997(RNA polymerase Rpb1, domain 1), PF00623(RNA polymerase Rpb1, domain 2)	ATCG00180	DNA-directed RNA polymerase family protein
Medtr8g022990	2.01836	0.806486	2.50265	0.0123267	0.0334484	PF03242(Late embryogenesis abundant protein)
Medtr7g069970	2.01465	0.615134	3.27514	0.0010561	0.00391168
Medtr2g031600	2.01418	0.550646	3.65785	0.000254339	0.00110154	PF08031(Berberine and berberine like ), PF01565(FAD binding domain )	AT5G44400	FAD-binding Berberine family protein
Medtr6g018370	2.01245	0.549421	3.66286	0.000249416	0.00108128		AT2G17030	F-box family protein with a domain of unknown function (DUF295)
Medtr2g023010	2.00672	0.305227	6.57453	4.88055e-11	6.97134e-10		AT3G20340
Medtr3g094060	2.00624	0.364449	5.50485	3.69487e-08	3.41185e-07	PF01357(Pollen allergen), PF03330(Rare lipoprotein A (RlpA)-like double-psi beta-barrel)	AT2G40610	expansin A8
Medtr4g013245	2.00504	0.219049	9.15339	5.51719e-20	2.51998e-18	PF06963(Ferroportin1 (FPN1))	AT5G03570	iron regulated 2
Medtr2g103795	1.9981	0.305497	6.54051	6.13102e-11	8.66222e-10		AT5G20190	Tetratricopeptide repeat (TPR)-like superfamily protein
Medtr4g033330	1.99252	0.735999	2.70723	0.00678471	0.0199768	PF00854(POT family)	AT1G22540	Major facilitator superfamily protein
Medtr1g104840	1.98934	0.412871	4.8183	1.44783e-06	1.00945e-05		AT3G05980
Medtr6g007095	1.98903	0.231022	8.60966	7.3276e-18	2.5882e-16	PF00657(GDSL-like Lipase/Acylhydrolase)	AT5G14450	GDSL-like Lipase/Acylhydrolase superfamily protein
Medtr8g062270	1.98627	0.422381	4.70257	2.5691e-06	1.7078e-05	PF07723(Leucine Rich Repeat), PF00646(F-box domain), PF08387(FBD)	AT5G53840	F-box/RNI-like/FBD-like domains-containing protein
MT4Noble_007280	1.98354	0.590584	3.35862	0.000783339	0.00300254
Medtr5g097220	1.9832	0.557964	3.55436	0.000378903	0.00157307		AT3G06240	F-box family protein
Medtr5g093830	1.97647	0.129967	15.2075	3.15391e-52	2.14712e-49	PF05697(Bacterial trigger factor protein (TF)), PF05698(Bacterial trigger factor protein (TF) C-terminus)	AT5G55220	trigger factor type chaperone family protein
Medtr7g052120	1.96991	0.461195	4.27133	1.94315e-05	0.000107454		AT4G12970	stomagen
Medtr2g098420	1.96735	0.302435	6.50502	7.76806e-11	1.08237e-09		AT5G12900
Medtr6g079440	1.9662	0.4215	4.66476	3.0898e-06	2.01224e-05	PF01535(PPR repeat)	AT1G62670	rna processing factor 2
Medtr3g087330	1.96398	0.605671	3.24265	0.00118425	0.00433103		AT5G10210
Medtr3g033620	1.9569	0.196932	9.93695	2.87502e-23	1.84028e-21	PF11891(Domain of unknown function (DUF3411))	AT5G12470	Protein of unknown function (DUF3411)
Medtr4g055580	1.95571	0.47185	4.14477	3.40155e-05	0.00017851	PF08387(FBD), PF00646(F-box domain)	AT3G59160	F-box/RNI-like superfamily protein
Medtr6g033985	1.95273	0.521363	3.74544	0.000180078	0.000805109
Medtr7g080090	1.95194	0.68996	2.82906	0.00466848	0.0144299	PF00831(Ribosomal L29 protein)	AT2G39390	Ribosomal L29 family protein
Medtr4g094625	1.95113	0.117675	16.5807	9.60888e-62	1.24769e-58	PF04481(Protein of unknown function (DUF561))
Medtr2g072010	1.94764	0.695686	2.79959	0.00511668	0.0156239	PF01535(PPR repeat)	AT1G53600	Tetratricopeptide repeat (TPR)-like superfamily protein
Medtr7g087190	1.94747	0.230547	8.44716	2.98475e-17	9.7122e-16	PF00657(GDSL-like Lipase/Acylhydrolase)	AT3G26430	GDSL-like Lipase/Acylhydrolase superfamily protein
Medtr6g042310	1.94405	0.397689	4.88836	1.0168e-06	7.29252e-06	PF00201(UDP-glucoronosyl and UDP-glucosyl transferase)	AT2G22590	UDP-Glycosyltransferase superfamily protein
Medtr5g079710	1.94045	0.535963	3.62049	0.000294042	0.00125417	PF04844(Transcriptional repressor, ovate)	AT5G19650	ovate family protein 8
Medtr3g062770	1.94028	0.732709	2.64809	0.0080947	0.023249	PF04983(RNA polymerase Rpb1, domain 3), PF00623(RNA polymerase Rpb1, domain 2), PF04997(RNA polymerase Rpb1, domain 1)	ATCG00180	DNA-directed RNA polymerase family protein
MT4Noble_017188	1.93922	0.734963	2.63853	0.00832659	0.0238072
Medtr7g015300	1.93682	0.650299	2.97835	0.00289806	0.00952559		AT3G29770	methyl esterase 11
Medtr1g073600	1.93086	0.678173	2.84715	0.00441127	0.0137298	PF00179(Ubiquitin-conjugating enzyme)	AT5G41340	ubiquitin conjugating enzyme 4
Medtr3g056620	1.92879	0.40174	4.8011	1.57795e-06	1.0905e-05	PF00931(NB-ARC domain)	AT3G07040	NB-ARC domain-containing disease resistance protein
Medtr3g012070	1.92653	0.632459	3.0461	0.00231834	0.00783936	PF03208(PRA1 family protein)	AT1G04260	CAMV movement protein interacting protein 7
Medtr2g089000	1.9265	0.18342	10.5032	8.35019e-26	6.71661e-24	PF00010(Helix-loop-helix DNA-binding domain)	AT5G54680	basic helix-loop-helix (bHLH) DNA-binding superfamily protein
Medtr7g056647	1.92579	0.205003	9.39395	5.77939e-21	2.90761e-19	PF00954(S-locus glycoprotein domain), PF07714(Protein tyrosine kinase), PF08276(PAN-like domain)	AT1G11330	S-locus lectin protein kinase family protein
Medtr5g094990	1.92545	0.618675	3.11222	0.00185684	0.00644586
Medtr0345s0020	1.92458	0.334697	5.75022	8.91248e-09	9.03441e-08		AT1G80630	RNI-like superfamily protein
MT4Noble_049810	1.92258	0.583238	3.29639	0.000979347	0.0036607
Medtr7g059010	1.9195	0.533221	3.59982	0.000318443	0.0013475		AT5G48850	Tetratricopeptide repeat (TPR)-like superfamily protein
Medtr3g005220	1.91665	0.526807	3.63825	0.000274502	0.00117987	PF03101(FAR1 DNA-binding domain)	AT3G06250	FAR1-related sequence 7
Medtr7g074850	1.91273	0.785189	2.43602	0.01485	0.0391166	PF01370(NAD dependent epimerase/dehydratase family)	AT2G45400	NAD(P)-binding Rossmann-fold superfamily protein
Medtr8g041620	1.91059	0.653723	2.92263	0.00347092	0.0111623	PF03171(2OG-Fe(II) oxygenase superfamily)	AT1G06620	2-oxoglutarate (2OG) and Fe(II)-dependent oxygenase superfamily protein
Medtr2g096080	1.9105	0.774419	2.46702	0.0136244	0.0363477	PF06203(CCT motif)	AT5G59990	CCT motif family protein
Medtr1g058050	1.90844	0.656074	2.90888	0.0036273	0.0116077	PF04707(PRELI-like family)	AT5G13070	MSF1-like family protein
Medtr4g132000	1.90783	0.3265	5.84327	5.11851e-09	5.41815e-08
Medtr8g063150	1.90672	0.133588	14.2732	3.217e-46	1.32911e-43		AT1G10522
Medtr0105s0110	1.90294	0.308952	6.15933	7.30528e-10	8.86911e-09		AT1G80630	RNI-like superfamily protein
Medtr1155s0010	1.90208	0.358473	5.30607	1.12013e-07	9.51221e-07		AT1G80630	RNI-like superfamily protein
Medtr8g063190	1.9005	0.424783	4.47405	7.67503e-06	4.6057e-05		AT1G10522
Medtr1g062710	1.90033	0.423834	4.48366	7.33723e-06	4.42245e-05	PF04909(Amidohydrolase)	AT3G53180	glutamate-ammonia ligases;catalytics;glutamate-ammonia ligases
Medtr4g019770	1.89469	0.510304	3.71287	0.000204925	0.000905507	PF03759(PRONE (Plant-specific Rop nucleotide exchanger))	AT5G02010	RHO guanyl-nucleotide exchange factor 7
Medtr2g010450	1.89332	0.751231	2.52028	0.011726	0.0320519	PF00010(Helix-loop-helix DNA-binding domain)	AT4G37850	basic helix-loop-helix (bHLH) DNA-binding superfamily protein
Medtr6g016260	1.89311	0.601803	3.14572	0.00165676	0.00583075	PF00069(Protein kinase domain)	AT5G58350	with no lysine (K) kinase 4
Medtr2g023650	1.88914	0.262662	7.1923	6.37079e-13	1.19971e-11		AT4G22030	F-box family protein with a domain of unknown function (DUF295)
Medtr8g078770	1.88881	0.709559	2.66194	0.00776908	0.022451	PF00188(Cysteine-rich secretory protein family)	AT5G66590	CAP (Cysteine-rich secretory proteins, Antigen 5, and Pathogenesis-related 1 protein) superfamily protein
Medtr2g023730	1.88635	0.363792	5.18525	2.15729e-07	1.73987e-06		AT4G22030	F-box family protein with a domain of unknown function (DUF295)
Medtr5g037700	1.88559	0.312657	6.03085	1.63104e-09	1.87343e-08	PF01582(TIR domain)	AT2G20142	Toll-Interleukin-Resistance (TIR) domain family protein
Medtr1g113900	1.88466	0.534897	3.52341	0.000426032	0.00175193		AT4G12560	F-box and associated interaction domains-containing protein
Medtr1g086000	1.88167	0.151345	12.433	1.7312e-35	3.02604e-33	PF05899(Protein of unknown function (DUF861))	AT2G32180	plastid transcriptionally active 18
Medtr6g012640	1.88109	0.195474	9.62321	6.38088e-22	3.55089e-20		AT3G29034
Medtr3g069220	1.88016	0.288255	6.52257	6.91137e-11	9.70939e-10
Medtr1g116370	1.87734	0.219305	8.56039	1.12485e-17	3.85333e-16	PF04652(Vta1 like), PF02364(1,3-beta-glucan synthase component )	AT5G13000	glucan synthase-like 12
Medtr4g072350	1.87728	0.671064	2.79747	0.00515041	0.0157146	PF00248(Aldo/keto reductase family)	AT1G59960	NAD(P)-linked oxidoreductase superfamily protein
Medtr5g023680	1.8772	0.231878	8.09564	5.69663e-16	1.55647e-14	PF00067(Cytochrome P450)	AT4G31500	cytochrome P450, family 83, subfamily B, polypeptide 1
Medtr2g097350	1.87545	0.704759	2.66113	0.00778791	0.0224982	PF03514(GRAS domain family)	AT2G29060	GRAS family transcription factor
Medtr8g035860	1.8717	0.727396	2.57315	0.0100778	0.0281011	PF00067(Cytochrome P450)	AT2G45510	cytochrome P450, family 704, subfamily A, polypeptide 2
Medtr5g024700	1.86539	0.461538	4.04169	5.30671e-05	0.00026782	PF03094(Mlo family)	AT2G17480	Seven transmembrane MLO family protein
Medtr3g118160	1.86518	0.723491	2.57803	0.0099366	0.0278003	PF10424()	AT5G27740	ATPase family associated with various cellular activities (AAA)
Medtr7g088825	1.86415	0.42622	4.37369	1.22165e-05	7.04418e-05	PF00854(POT family)	AT1G68570	Major facilitator superfamily protein
Medtr4g006090	1.86339	0.399275	4.66692	3.05746e-06	1.99547e-05	PF00312(Ribosomal protein S15)	ATCG01120	chloroplast ribosomal protein S15
Medtr8g056860	1.8619	0.15801	11.7834	4.75482e-32	6.41853e-30	PF00004(ATPase family associated with various cellular activities (AAA)), PF01434(Peptidase family M41)	AT1G79560	FTSH protease 12
Medtr5g069230	1.8616	0.676455	2.75199	0.00592337	0.0177493
Medtr8g041390	1.85874	0.262948	7.06884	1.56231e-12	2.78074e-11	PF00892(EamA-like transporter family)	AT5G07050	nodulin MtN21 /EamA-like transporter family protein
Medtr8g093250	1.8516	0.269127	6.88004	5.98343e-12	9.78154e-11	PF06838(Methionine gamma-lyase )
Medtr8g106150	1.84908	0.1274	14.5139	9.88679e-48	4.56937e-45	PF00512(His Kinase A (phospho-acceptor) domain), PF03924(CHASE domain), PF00072(Response regulator receiver domain), PF02518(Histidine kinase-, DNA gyrase B-, and HSP90-like ATPase)	AT2G01830	CHASE domain containing histidine kinase protein
Medtr2g035660	1.84433	0.0886477	20.8052	3.8833e-96	2.64724e-92	PF09273(Rubisco LSMT substrate-binding), PF00856(SET domain)	AT4G20130	plastid transcriptionally active 14
Medtr1g063350	1.83491	0.159258	11.5216	1.0274e-30	1.25628e-28		AT5G52970	thylakoid lumen 15.0 kDa protein
Medtr5g084455	1.83389	0.483743	3.79103	0.000150024	0.000683977
Medtr8g092080	1.83012	0.140909	12.988	1.43187e-38	3.25369e-36	PF00153(Mitochondrial carrier protein)	AT4G39460	S-adenosylmethionine carrier 1
MT4Noble_014659	1.82932	0.676484	2.70415	0.00684791	0.0201433
Medtr1g103290	1.82692	0.206221	8.85902	8.07233e-19	3.21979e-17	PF02574(Homocysteine S-methyltransferase)	AT3G22740	homocysteine S-methyltransferase 3
Medtr1g015980	1.82566	0.307418	5.93868	2.8732e-09	3.18352e-08	PF08244(Glycosyl hydrolases family 32 C terminal), PF00251(Glycosyl hydrolases family 32 N-terminal domain)	AT3G13790	Glycosyl hydrolases family 32 protein
Medtr7g069440	1.82513	0.596096	3.0618	0.00220013	0.00747857		AT5G11040	TRS120
Medtr0365s0030	1.82407	0.354809	5.14098	2.7331e-07	2.1652e-06	PF00069(Protein kinase domain), PF00560(Leucine Rich Repeat), PF08263(Leucine rich repeat N-terminal domain)	AT1G35710	Protein kinase family protein with leucine-rich repeat domain
Medtr5g012790	1.82232	0.572123	3.18519	0.00144657	0.00517246	PF04784(Protein of unknown function, DUF547)	AT5G47380	Protein of unknown function, DUF547
Medtr4g132380	1.82173	0.560251	3.25163	0.00114745	0.00421358		AT4G04480
Medtr2g014730	1.82111	0.425899	4.27591	1.90355e-05	0.000105414	PF00931(NB-ARC domain)	AT3G14460	LRR and NB-ARC domains-containing disease resistance protein
Medtr4g133250	1.82103	0.625737	2.91021	0.0036118	0.0115686
Medtr2g012780	1.81992	0.201795	9.01866	1.9041e-19	8.11267e-18		AT1G11120
Medtr7g075580	1.81917	0.187196	9.71795	2.52814e-22	1.47072e-20	PF00067(Cytochrome P450)	AT2G45550	cytochrome P450, family 76, subfamily C, polypeptide 4
Medtr5g044120	1.81749	0.437287	4.15628	3.23475e-05	0.000170613	PF01535(PPR repeat)	AT1G26500	Pentatricopeptide repeat (PPR) superfamily protein
Medtr0400s0040	1.81665	0.350003	5.19037	2.09882e-07	1.6976e-06	PF00069(Protein kinase domain), PF00560(Leucine Rich Repeat), PF08263(Leucine rich repeat N-terminal domain)	AT1G35710	Protein kinase family protein with leucine-rich repeat domain
Medtr3g008010	1.81342	0.158531	11.4389	2.67264e-30	3.14128e-28	PF00201(UDP-glucoronosyl and UDP-glucosyl transferase)	AT1G22340	UDP-glucosyl transferase 85A7
Medtr2g097800	1.80777	0.239194	7.55776	4.10059e-14	8.99558e-13		AT5G59050
Medtr1g013130	1.80615	0.205677	8.78149	1.61328e-18	6.1959e-17		AT5G10970	C2H2 and C2HC zinc fingers superfamily protein
Medtr2g010810	1.80505	0.715357	2.52328	0.0116264	0.0318287
MT4Noble_005530	1.80353	0.549897	3.27976	0.00103895	0.00385865
Medtr3g088605	1.79821	0.162208	11.0859	1.46944e-28	1.5007e-26		AT1G21600	plastid transcriptionally active 6
Medtr2g007350	1.7971	0.718354	2.5017	0.0123599	0.0335254
Medtr7g100100	1.79672	0.400334	4.48805	7.18788e-06	4.34011e-05		AT2G37430	C2H2 and C2HC zinc fingers superfamily protein
Medtr4g076600	1.79104	0.170123	10.5279	6.42336e-26	5.21287e-24	PF01379(Porphobilinogen deaminase, dipyromethane cofactor binding domain), PF03900(Porphobilinogen deaminase, C-terminal domain)	AT5G08280	hydroxymethylbilane synthase
Medtr5g010635	1.78802	0.261355	6.84134	7.84566e-12	1.25844e-10	PF00314(Thaumatin family)	AT4G11650	osmotin 34
Medtr1g048990	1.7869	0.170012	10.5104	7.73495e-26	6.24014e-24	PF00081(Iron/manganese superoxide dismutases, alpha-hairpin domain), PF02777(Iron/manganese superoxide dismutases, C-terminal domain)	AT5G51100	Fe superoxide dismutase 2
Medtr1g061870	1.78441	0.597042	2.98875	0.00280121	0.00924515	PF00076(RNA recognition motif. (a.k.a. RRM, RBD, or RNP domain))	AT2G36660	poly(A) binding protein 7
Medtr7g088820	1.78425	0.488848	3.64991	0.000262335	0.00113348	PF00854(POT family)	AT1G68570	Major facilitator superfamily protein
Medtr6g038420	1.7831	0.630111	2.82982	0.00465735	0.0143987
Medtr4g015600	1.78297	0.339874	5.24596	1.5547e-07	1.28699e-06		AT3G47160	RING/U-box superfamily protein
Medtr8g022040	1.78268	0.17525	10.1722	2.63879e-24	1.83558e-22		AT3G14110	Tetratricopeptide repeat (TPR)-like superfamily protein
Medtr3g078210	1.78142	0.499035	3.56972	0.000357362	0.00149456	PF02358(Trehalose-phosphatase), PF00982(Glycosyltransferase family 20)	AT1G23870	trehalose-phosphatase/synthase 9
Medtr1g026160	1.78	0.602634	2.9537	0.0031399	0.0102207	PF01842(ACT domain), PF00069(Protein kinase domain)	AT4G38470	ACT-like protein tyrosine kinase family protein
Medtr8g036035	1.77954	0.11158	15.9485	2.91623e-57	3.05845e-54	PF00701(Dihydrodipicolinate synthetase family)	AT2G45440	dihydrodipicolinate synthase
Medtr7g022840	1.77776	0.451724	3.93551	8.30211e-05	0.000400393	PF09713(Plant protein 1589 of unknown function (A_thal_3526))	AT3G55240	Plant protein 1589 of unknown function
Medtr4g061930	1.77409	0.248757	7.13179	9.90696e-13	1.81792e-11	PF07714(Protein tyrosine kinase), PF11721(Di-glucose binding within endoplasmic reticulum)	AT3G46290	hercules receptor kinase 1
Medtr3g067980	1.7704	0.349695	5.06268	4.13399e-07	3.17895e-06	PF08137(DVL family)	AT2G39705	ROTUNDIFOLIA like 8
Medtr8g015940	1.77016	0.638159	2.77385	0.00553967	0.0167301	PF06888(Putative Phosphatase)	AT1G17710	Pyridoxal phosphate phosphatase-related protein
Medtr4g104870	1.76941	0.216959	8.15548	3.47785e-16	9.74117e-15		AT4G24700
Medtr3g088630	1.76877	0.175901	10.0555	8.68744e-24	5.82037e-22	PF00072(Response regulator receiver domain)	AT3G57040	response regulator 9
Medtr4g034810	1.76733	0.392344	4.50454	6.65164e-06	4.04318e-05	PF00444(Ribosomal protein L36), PF00410(Ribosomal protein S8)	ATCG00770	ribosomal protein S8
Medtr1g087760	1.76639	0.545709	3.23687	0.00120848	0.00441195	PF00155(Aminotransferase class I and II)	AT1G77670	Pyridoxal phosphate (PLP)-dependent transferases superfamily protein
Medtr8g016010	1.76299	0.680288	2.59153	0.00955493	0.0268436	PF00664(ABC transporter transmembrane region), PF00005(ABC transporter)	AT3G21250	multidrug resistance-associated protein 6
Medtr1g085560	1.75765	0.199656	8.8034	1.3273e-18	5.17042e-17	PF00160(Cyclophilin type peptidyl-prolyl cis-trans isomerase/CLD)	AT3G62030	rotamase CYP 4
Medtr7g017525	1.75746	0.572919	3.06755	0.00215822	0.00735536	PF01713(Smr domain)	AT2G31400	genomes uncoupled 1
Medtr3g010320	1.75474	0.39882	4.39983	1.08334e-05	6.31205e-05		AT4G33925
Medtr4g105520	1.75222	0.414791	4.22435	2.39636e-05	0.000130167	PF08263(Leucine rich repeat N-terminal domain), PF00560(Leucine Rich Repeat)	AT4G20140	Leucine-rich repeat transmembrane protein kinase
Medtr7g112120	1.74771	0.637787	2.74027	0.00613879	0.0183063		AT1G56423
Medtr8g005010	1.74665	0.403733	4.32625	1.51668e-05	8.58381e-05	PF00149(Calcineurin-like phosphoesterase)	AT5G59160	type one serine/threonine protein phosphatase 2
Medtr1g081610	1.74575	0.227783	7.66409	1.80104e-14	4.12435e-13	PF00291(Pyridoxal-phosphate dependent enzyme)	AT4G14880	O-acetylserine (thiol) lyase (OAS-TL) isoform A1
Medtr8g097390	1.7419	0.34819	5.00273	5.65235e-07	4.25182e-06	PF04525(LURP-one-related)	AT1G63410	Protein of unknown function (DUF567)
Medtr4g104570	1.74118	0.344954	5.04757	4.47455e-07	3.42827e-06	PF00067(Cytochrome P450)	AT3G48280	cytochrome P450, family 71, subfamily A, polypeptide 25
Medtr0891s0010	1.73869	0.301032	5.77577	7.66029e-09	7.86449e-08	PF00201(UDP-glucoronosyl and UDP-glucosyl transferase)	AT1G22380	UDP-glucosyl transferase 85A3
Medtr7g068580	1.73591	0.486411	3.56882	0.000358597	0.00149881		AT2G38185	RING/U-box superfamily protein
Medtr2g073010	1.73411	0.395057	4.38954	1.13593e-05	6.59593e-05	PF00197(Trypsin and protease inhibitor)	AT1G17860	Kunitz family trypsin and protease inhibitor protein
Medtr5g035610	1.73383	0.616113	2.81413	0.00489088	0.0150231
Medtr8g015950	1.73139	0.401239	4.31511	1.59522e-05	8.97615e-05	PF06888(Putative Phosphatase)	AT1G17710	Pyridoxal phosphate phosphatase-related protein
Medtr7g065265	1.72877	0.300052	5.76157	8.33358e-09	8.49496e-08	PF02798(Glutathione S-transferase, N-terminal domain), PF00043(Glutathione S-transferase, C-terminal domain)	AT3G09270	glutathione S-transferase TAU 8
Medtr3g085460	1.72723	0.408077	4.23259	2.31011e-05	0.000125783	PF04727(ELMO/CED-12 family)	AT1G67400	ELMO/CED-12 family protein
Medtr7g109580	1.72664	0.568238	3.03858	0.00237694	0.00801466	PF03514(GRAS domain family)	AT3G03450	RGA-like 2
Medtr2g022940	1.72565	0.666542	2.58896	0.00962668	0.027034	PF08491(Squalene epoxidase)	AT4G37760	squalene epoxidase 3
Medtr7g117505	1.72456	0.614567	2.80614	0.00501385	0.0153529	PF01764(Lipase (class 3))	AT3G14360	alpha/beta-Hydrolases superfamily protein
Medtr5g037710	1.72417	0.285697	6.03497	1.58996e-09	1.83087e-08	PF01582(TIR domain)	AT2G20142	Toll-Interleukin-Resistance (TIR) domain family protein
Medtr3g479470	1.72326	0.385997	4.46444	8.02801e-06	4.80271e-05	PF00201(UDP-glucoronosyl and UDP-glucosyl transferase)	AT1G22400	UDP-Glycosyltransferase superfamily protein
Medtr5g017890	1.71938	0.201662	8.52606	1.51414e-17	5.09803e-16	PF00069(Protein kinase domain)	AT5G66850	mitogen-activated protein kinase kinase kinase 5
Medtr4g061833	1.71729	0.246471	6.9675	3.22615e-12	5.45385e-11	PF07714(Protein tyrosine kinase), PF11721(Di-glucose binding within endoplasmic reticulum)	AT3G46290	hercules receptor kinase 1
Medtr3g452760	1.71652	0.230532	7.44591	9.62799e-14	2.01023e-12	PF00560(Leucine Rich Repeat), PF08263(Leucine rich repeat N-terminal domain)	AT4G13920	receptor like protein 50
Medtr1g098580	1.71461	0.358716	4.77985	1.75426e-06	1.20159e-05		AT1G21090	Cupredoxin superfamily protein
Medtr1g017390	1.71069	0.128002	13.3646	9.73476e-41	2.57716e-38	PF00118(TCP-1/cpn60 chaperonin family)	AT1G55490	chaperonin 60 beta
Medtr8g028525	1.71008	0.528256	3.23721	0.00120703	0.00440784
Medtr1g017530	1.70961	0.398845	4.2864	1.81595e-05	0.000101055
MT4Noble_027038	1.70731	0.399787	4.27056	1.94982e-05	0.00010778
Medtr3g020970	1.70498	0.23366	7.29683	2.94633e-13	5.78822e-12	PF00280(Potato inhibitor I family)	AT2G38900	Serine protease inhibitor, potato inhibitor I-type family protein
Medtr8g096220	1.70477	0.405261	4.20661	2.59235e-05	0.000139921	PF06911(Senescence-associated protein)	AT3G21600	Senescence/dehydration-associated protein-related
Medtr6g043180	1.7047	0.652466	2.6127	0.00898295	0.0254464	PF02171(Piwi domain), PF08699(Argonaute linker 1 domain), PF02170(PAZ domain)	AT2G27040	Argonaute family protein
Medtr4g123970	1.70279	0.279426	6.09388	1.10205e-09	1.30486e-08	PF01416(tRNA pseudouridine synthase)	AT3G06950	Pseudouridine synthase family protein
Medtr1g103020	1.70264	0.143954	11.8277	2.80625e-32	3.90413e-30	PF00109(Beta-ketoacyl synthase, N-terminal domain), PF02801(Beta-ketoacyl synthase, C-terminal domain)	AT5G46290	3-ketoacyl-acyl carrier protein synthase I
Medtr4g119990	1.70205	0.502397	3.38785	0.000704432	0.00273586	PF02362(B3 DNA binding domain)	AT4G31680	Transcriptional factor B3 family protein
Medtr3g099590	1.70087	0.0915149	18.5857	4.19592e-77	1.27127e-73	PF00076(RNA recognition motif. (a.k.a. RRM, RBD, or RNP domain))	AT4G09040	RNA-binding (RRM/RBD/RNP motifs) family protein
MT4Noble_045446	1.69696	0.495212	3.42673	0.000610898	0.00241001
Medtr5g088770	1.69382	0.507879	3.33509	0.000852721	0.00323656	PF00031(Cystatin domain)	AT3G12490	cystatin B
Medtr4g081870	1.69278	0.209149	8.09365	5.79046e-16	1.57737e-14	PF02365(No apical meristem (NAM) protein)	AT1G69490	NAC-like, activated by AP3/PI
Medtr5g090250	1.68978	0.689071	2.45226	0.0141963	0.0376745	PF00280(Potato inhibitor I family)	AT2G38870	Serine protease inhibitor, potato inhibitor I-type family protein
Medtr4g078600	1.6893	0.214461	7.87698	3.35381e-15	8.41323e-14	PF03007(Wax ester synthase-like Acyl-CoA acyltransferase domain), PF06974(Protein of unknown function (DUF1298))	AT3G49190	O-acyltransferase (WSD1-like) family protein
Medtr5g010640	1.68887	0.525543	3.21358	0.00131093	0.00474909	PF00314(Thaumatin family)	AT4G11650	osmotin 34
Medtr6g039440	1.68702	0.247351	6.82035	9.08197e-12	1.44654e-10	PF01397(Terpene synthase, N-terminal domain), PF03936(Terpene synthase family, metal binding domain)	AT5G23960	terpene synthase 21
Medtr7g100810	1.68457	0.382577	4.40322	1.06656e-05	6.22496e-05	PF01535(PPR repeat)	AT3G53360	Tetratricopeptide repeat (TPR)-like superfamily protein
Medtr3g075320	1.68415	0.395107	4.26251	2.02145e-05	0.000111401	PF00544(Pectate lyase)	AT5G63180	Pectin lyase-like superfamily protein
Medtr2g063570	1.68397	0.428899	3.92626	8.62772e-05	0.000414629	PF00656(Caspase domain)	AT1G79330	metacaspase 5
Medtr4g023520	1.68274	0.493505	3.40977	0.000650182	0.00254291	PF01535(PPR repeat)	AT1G09220	Pentatricopeptide repeat (PPR) superfamily protein
Medtr8g066700	1.68254	0.560138	3.00379	0.00266635	0.00885688	PF00069(Protein kinase domain), PF00560(Leucine Rich Repeat), PF08263(Leucine rich repeat N-terminal domain)	AT3G47570	Leucine-rich repeat protein kinase family protein
Medtr3g498715	1.67985	0.344006	4.8832	1.04378e-06	7.46248e-06	PF00999(Sodium/hydrogen exchanger family)	AT3G44900	cation/H exchanger 4
Medtr6g016820	1.67833	0.239572	7.00555	2.46015e-12	4.25386e-11	PF03639(Glycosyl hydrolase family 81 )	AT5G15870	glycosyl hydrolase family 81 protein
Medtr8g093330	1.67824	0.105506	15.9066	5.70426e-57	5.55513e-54	PF00696(Amino acid kinase family)	AT3G18680	Amino acid kinase family protein
Medtr1g083950	1.67739	0.160421	10.4562	1.37216e-25	1.08139e-23	PF00582(Universal stress protein family)	AT3G62550	Adenine nucleotide alpha hydrolases-like superfamily protein
Medtr4g077960	1.67652	0.538331	3.11429	0.00184391	0.00641076	PF00201(UDP-glucoronosyl and UDP-glucosyl transferase)	AT2G22590	UDP-Glycosyltransferase superfamily protein
Medtr3g088845	1.67611	0.419863	3.99204	6.55075e-05	0.000324008	PF00676(Dehydrogenase E1 component)	AT1G21400	Thiamin diphosphate-binding fold (THDP-binding) superfamily protein
Medtr3g088455	1.67408	0.497074	3.36788	0.000757492	0.002917	PF01490(Transmembrane amino acid transporter protein)	AT1G77380	amino acid permease 3
Medtr3g111540	1.67316	0.208403	8.02848	9.86849e-16	2.61003e-14		AT1G48460
Medtr8g471150	1.67286	0.604688	2.76648	0.00566643	0.0170751		AT4G38070	basic helix-loop-helix (bHLH) DNA-binding superfamily protein
Medtr0316s0010	1.67278	0.1207	13.8589	1.12327e-43	3.78139e-41	PF00347(Ribosomal protein L6)	AT1G05190	Ribosomal protein L6 family
Medtr3g075540	1.67238	0.10104	16.5517	1.55636e-61	1.92904e-58	PF00581(Rhodanese-like domain)	AT4G24750	Rhodanese/Cell cycle control phosphatase superfamily protein
Medtr3g079680	1.67184	0.221989	7.53118	5.02842e-14	1.08981e-12		AT4G39880	Ribosomal protein L23/L15e family protein
Medtr4g104640	1.67043	0.314562	5.31033	1.0943e-07	9.32787e-07	PF00067(Cytochrome P450)	AT3G26330	cytochrome P450, family 71, subfamily B, polypeptide 37
Medtr4g077475	1.66935	0.363012	4.59861	4.2531e-06	2.68955e-05	PF00443(Ubiquitin carboxyl-terminal hydrolase)	AT3G20630	ubiquitin-specific protease 14
Medtr7g017570	1.6691	0.128438	12.9954	1.2997e-38	3.00341e-36	PF01535(PPR repeat)	AT2G31400	genomes uncoupled 1
Medtr7g006690	1.66575	0.485655	3.4299	0.000603793	0.00238854	PF01161(Phosphatidylethanolamine-binding protein)	AT1G65480	PEBP (phosphatidylethanolamine-binding protein) family protein
Medtr4g074950	1.66521	0.179904	9.25612	2.12001e-20	1.02497e-18		AT2G05990	NAD(P)-binding Rossmann-fold superfamily protein
Medtr2g023790	1.66463	0.355835	4.67809	2.89564e-06	1.90491e-05		AT4G22030	F-box family protein with a domain of unknown function (DUF295)
Medtr4g035590	1.66408	0.594121	2.80092	0.00509577	0.0155688	PF02365(No apical meristem (NAM) protein)	AT4G10350	NAC domain containing protein 70
Medtr8g098250	1.66195	0.538606	3.08566	0.00203101	0.00697482	PF01535(PPR repeat)	AT4G39530	Tetratricopeptide repeat (TPR)-like superfamily protein
Medtr5g095420	1.66115	0.337622	4.92015	8.64786e-07	6.31352e-06	PF00560(Leucine Rich Repeat), PF08263(Leucine rich repeat N-terminal domain)	AT3G05660	receptor like protein 33
Medtr7g114520	1.66073	0.224578	7.39488	1.41532e-13	2.90172e-12	PF02458(Transferase family)	AT5G17540	HXXXD-type acyl-transferase family protein
MT4Noble_030540	1.66019	0.62297	2.66496	0.00769972	0.0222789
Medtr8g009290	1.65841	0.133404	12.4315	1.76361e-35	3.06307e-33		AT2G44640
Medtr8g088800	1.65771	0.266565	6.21881	5.00943e-10	6.24301e-09	PF03800(Nuf2 family)	AT1G61000
Medtr2g070410	1.65703	0.1599	10.3629	3.6572e-25	2.75482e-23	PF01596(O-methyltransferase)	AT3G62000	S-adenosyl-L-methionine-dependent methyltransferases superfamily protein
MT4Noble_022504	1.65605	0.642561	2.57726	0.00995877	0.0278462
Medtr5g097180	1.65486	0.170625	9.69883	3.04964e-22	1.75438e-20	PF00450(Serine carboxypeptidase)	AT1G15000	serine carboxypeptidase-like 50
Medtr7g051910	1.65361	0.233521	7.08123	1.42877e-12	2.55642e-11	PF03188(Eukaryotic cytochrome b561), PF04526(Protein of unknown function (DUF568))	AT3G25290	Auxin-responsive family protein
Medtr3g071050	1.65135	0.412625	4.00206	6.27946e-05	0.000311835		AT3G27230	S-adenosyl-L-methionine-dependent methyltransferases superfamily protein
Medtr2g097390	1.65043	0.513027	3.21705	0.00129515	0.00469693	PF03514(GRAS domain family)	AT1G07530	SCARECROW-like 14
Medtr7g076620	1.64852	0.160166	10.2926	7.60976e-25	5.54821e-23		AT4G23890
Medtr6g051950	1.64801	0.417936	3.9432	8.04022e-05	0.000389139
Medtr1g067330	1.64648	0.191082	8.61659	6.89765e-18	2.44903e-16	PF03692(Putative zinc- or iron-chelating domain)	AT5G02710
Medtr8g090145	1.64614	0.34192	4.81439	1.47648e-06	1.02549e-05
Medtr2g078750	1.64593	0.184572	8.91759	4.76538e-19	1.94524e-17		AT5G53900	Serine/threonine-protein kinase WNK (With No Lysine)-related
Medtr2g073080	1.64355	0.191603	8.57789	9.66297e-18	3.33531e-16	PF01758(Sodium Bile acid symporter family)	AT1G78560	Sodium Bile acid symporter family
Medtr2g098540	1.64128	0.520635	3.15246	0.00161902	0.00571193	PF00232(Glycosyl hydrolase family 1)	AT2G44450	beta glucosidase 15
Medtr7g109280	1.63775	0.307457	5.32678	9.99703e-08	8.58039e-07		AT1G02700
Medtr4g025970	1.63734	0.257247	6.36487	1.95459e-10	2.58601e-09	PF00067(Cytochrome P450)	AT4G31500	cytochrome P450, family 83, subfamily B, polypeptide 1
Medtr3g092425	1.63656	0.369731	4.42635	9.58417e-06	5.65062e-05
Medtr6g463360	1.63518	0.623184	2.62392	0.00869246	0.024734	PF03492(SAM dependent carboxyl methyltransferase)
Medtr8g039820	1.63449	0.221754	7.37071	1.69716e-13	3.4382e-12	PF01582(TIR domain), PF00931(NB-ARC domain)	AT5G17680	disease resistance protein (TIR-NBS-LRR class), putative
Medtr1g112020	1.63322	0.381172	4.28474	1.82955e-05	0.000101771	PF08661(Replication factor A protein 3)	AT4G18590	Nucleic acid-binding, OB-fold-like protein
Medtr4g104550	1.63227	0.310506	5.25681	1.46573e-07	1.21815e-06	PF00067(Cytochrome P450)	AT3G48280	cytochrome P450, family 71, subfamily A, polypeptide 25
Medtr4g050863	1.63153	0.638053	2.55704	0.0105567	0.0292748		ATCG00500	acetyl-CoA carboxylase carboxyl transferase subunit beta
Medtr3g462410	1.63082	0.234375	6.95813	3.44816e-12	5.79682e-11	PF00125(Core histone H2A/H2B/H3/H4)	AT5G59690	Histone superfamily protein
Medtr8g088860	1.62598	0.25187	6.45563	1.07772e-10	1.47304e-09	PF00190(Cupin)	AT2G28680	RmlC-like cupins superfamily protein
Medtr7g062140	1.61927	0.139924	11.5725	5.68296e-31	7.20758e-29	PF05368(NmrA-like family)	AT2G37660	NAD(P)-binding Rossmann-fold superfamily protein
Medtr1g019110	1.61857	0.300008	5.39508	6.84928e-08	6.04616e-07	PF00847(AP2 domain)	AT2G23340	DREB and EAR motif protein 3
Medtr2g087110	1.61703	0.365968	4.41851	9.93833e-06	5.84678e-05	PF01535(PPR repeat)	AT1G06140	Pentatricopeptide repeat (PPR) superfamily protein
Medtr1g103870	1.61694	0.261349	6.18693	6.13476e-10	7.53865e-09	PF01063(Amino-transferase class IV)	AT3G54970	D-aminoacid aminotransferase-like PLP-dependent enzymes superfamily protein
Medtr1g040925	1.61329	0.470586	3.42827	0.000607442	0.00239985	PF00888(Cullin family), PF10557(Cullin protein neddylation domain)	AT1G26830	cullin 3
Medtr2g042670	1.61292	0.530063	3.04288	0.00234327	0.00791482		AT1G72490
Medtr8g104290	1.61112	0.559557	2.87927	0.00398598	0.0125857		AT1G48780
Medtr8g032690	1.61099	0.300846	5.35487	8.56172e-08	7.44692e-07	PF00097(Zinc finger, C3HC4 type (RING finger))	AT3G03550	RING/U-box superfamily protein
Medtr4g083370	1.61034	0.111884	14.3929	5.73059e-47	2.52035e-44	PF01029(NusB family)	AT4G26370	antitermination NusB domain-containing protein
Medtr4g132970	1.60745	0.345448	4.65324	3.26763e-06	2.11713e-05	PF04720(PDDEXK-like family of unknown function)	AT1G62420	Protein of unknown function (DUF506)
Medtr2g044920	1.60583	0.118576	13.5426	8.76493e-42	2.54258e-39	PF00861(Ribosomal L18p/L5e family)	AT1G48350	Ribosomal L18p/L5e family protein
Medtr7g087110	1.60511	0.135848	11.8155	3.24645e-32	4.42622e-30	PF00291(Pyridoxal-phosphate dependent enzyme)	AT3G03630	cysteine synthase 26
Medtr4g057970	1.60425	0.111959	14.3289	1.44316e-46	6.14875e-44	PF00118(TCP-1/cpn60 chaperonin family)	AT2G28000	chaperonin-60alpha
Medtr7g017280	1.60335	0.468699	3.42085	0.000624266	0.0024567	PF05641(Agenet domain), PF00646(F-box domain)	AT1G09320	agenet domain-containing protein
Medtr4g070640	1.6029	0.405266	3.95519	7.64726e-05	0.000371798		AT5G66440
Medtr5g009740	1.59971	0.299462	5.34196	9.19468e-08	7.95181e-07		AT5G41650	Lactoylglutathione lyase / glyoxalase I family protein
Medtr7g068340	1.59865	0.154494	10.3476	4.29028e-25	3.21394e-23	PF00153(Mitochondrial carrier protein)	AT3G51870	Mitochondrial substrate carrier family protein
Medtr2g438010	1.59784	0.15187	10.5211	6.90521e-26	5.58727e-24	PF02536(mTERF)	AT5G07900	Mitochondrial transcription termination factor family protein
Medtr6g077940	1.59745	0.403197	3.96196	7.43362e-05	0.000362352
Medtr6g012970	1.5967	0.514005	3.10638	0.0018939	0.00655949	PF00847(AP2 domain)	AT5G19790	related to AP2 11
Medtr4g076660	1.59645	0.656909	2.43025	0.0150885	0.0396409		AT1G11050	Protein kinase superfamily protein
Medtr7g026910	1.59628	0.259395	6.15385	7.56225e-10	9.15257e-09
Medtr5g024910	1.59445	0.674296	2.36461	0.018049	0.0460651
Medtr1g021740	1.59364	0.157594	10.1123	4.8736e-24	3.34744e-22	PF01554(MatE)	AT1G47530	MATE efflux family protein
Medtr2g096210	1.59111	0.1998	7.9635	1.67241e-15	4.3022e-14	PF08392(FAE1/Type III polyketide synthase-like protein), PF08541(3-Oxoacyl-[acyl-carrier-protein (ACP)] synthase III C terminal )	AT2G28630	3-ketoacyl-CoA synthase 12
Medtr8g032890	1.58982	0.391841	4.05729	4.96451e-05	0.00025209	PF01476(LysM domain)	AT3G52790	peptidoglycan-binding LysM domain-containing protein
Medtr8g028380	1.58958	0.460452	3.4522	0.000556027	0.0022202	PF01823(MAC/Perforin domain)	AT1G29690	MAC/Perforin domain-containing protein
Medtr3g093360	1.5892	0.650815	2.44187	0.0146115	0.0385849
Medtr2g097030	1.58837	0.455269	3.48886	0.000485088	0.00196807	PF01357(Pollen allergen), PF03330(Rare lipoprotein A (RlpA)-like double-psi beta-barrel)	AT2G39700	expansin A4
Medtr5g041700	1.58633	0.233656	6.78917	1.12784e-11	1.77154e-10	PF03330(Rare lipoprotein A (RlpA)-like double-psi beta-barrel), PF01357(Pollen allergen)	AT2G03090	expansin A15
Medtr5g092040	1.58547	0.672897	2.35618	0.0184638	0.0469261	PF01535(PPR repeat)	AT3G48250	Pentatricopeptide repeat (PPR) superfamily protein
Medtr8g009280	1.58418	0.114977	13.7783	3.44392e-43	1.05515e-40	PF00166(Chaperonin 10 Kd subunit)	AT3G60210	GroES-like family protein
Medtr4g083080	1.58228	0.174926	9.04541	1.49105e-19	6.42306e-18	PF00561(alpha/beta hydrolase fold)	AT1G13820	alpha/beta-Hydrolases superfamily protein
Medtr1g067170	1.58098	0.518612	3.04848	0.00230003	0.00778515		AT5G02790	Glutathione S-transferase family protein
Medtr5g011450	1.58078	0.658566	2.40034	0.0163797	0.0424888	PF01758(Sodium Bile acid symporter family)	AT4G22840	Sodium Bile acid symporter family
Medtr3g083820	1.58044	0.234442	6.74129	1.56988e-11	2.42398e-10	PF00149(Calcineurin-like phosphoesterase)	AT3G07130	purple acid phosphatase 15
Medtr1g080990	1.57974	0.270686	5.83605	5.34542e-09	5.63864e-08		AT4G14746
Medtr5g074620	1.57916	0.347139	4.54906	5.38869e-06	3.34484e-05	PF01416(tRNA pseudouridine synthase)	AT2G30320	Pseudouridine synthase family protein
Medtr3g110640	1.57803	0.0896672	17.5988	2.51766e-69	4.90368e-66		AT5G17870	plastid-specific 50S ribosomal protein 6
Medtr8g099160	1.57697	0.124269	12.6899	6.72348e-37	1.30954e-34	PF03417(Acyl-coenzyme A:6-aminopenicillanic acid acyl-transferase)
Medtr2g096120	1.57384	0.534644	2.94371	0.00324304	0.010515		AT5G02640
Medtr4g068280	1.57331	0.120123	13.0975	3.40383e-39	8.2871e-37		AT2G30695
Medtr2g017865	1.57241	0.325388	4.83241	1.34892e-06	9.46049e-06	PF00319(SRF-type transcription factor (DNA-binding and dimerisation domain)), PF01486(K-box region)	AT4G18960	K-box region and MADS-box transcription factor family protein
Medtr4g009510	1.56967	0.371088	4.22993	2.33765e-05	0.000127181		AT4G37850	basic helix-loop-helix (bHLH) DNA-binding superfamily protein
Medtr0991s0010	1.56796	0.153766	10.1971	2.04297e-24	1.43948e-22	PF00118(TCP-1/cpn60 chaperonin family)	AT5G56500	TCP-1/cpn60 chaperonin family protein
Medtr2g063560	1.56719	0.454885	3.44525	0.000570532	0.00226888	PF00011(Hsp20/alpha crystallin family)	AT1G59860	HSP20-like chaperones superfamily protein
Medtr5g005370	1.56689	0.297037	5.27509	1.32694e-07	1.11127e-06	PF05770(Inositol 1, 3, 4-trisphosphate 5/6-kinase)	AT4G08170	Inositol 1,3,4-trisphosphate 5/6-kinase family protein
Medtr3g095620	1.56654	0.219801	7.12708	1.0252e-12	1.87493e-11	PF00069(Protein kinase domain)	AT1G49180	protein kinase family protein
Medtr6g033500	1.56435	0.668912	2.33866	0.0193533	0.0488679
Medtr7g101180	1.56264	0.384292	4.06629	4.77676e-05	0.00024319	PF00667(FAD binding domain), PF00175(Oxidoreductase NAD-binding domain ), PF00258(Flavodoxin)	AT3G02280	Flavodoxin family protein
Medtr1g067600	1.56241	0.136882	11.4143	3.54824e-30	4.1525e-28		AT3G53560	Tetratricopeptide repeat (TPR)-like superfamily protein
Medtr1g100345	1.56207	0.663431	2.35453	0.0185459	0.0471042		AT4G23430	NAD(P)-binding Rossmann-fold superfamily protein
Medtr8g064990	1.5593	0.128108	12.1718	4.39435e-34	6.96657e-32	PF00378(Enoyl-CoA hydratase/isomerase)	AT1G60550	enoyl-CoA hydratase/isomerase D
Medtr4g052500	1.55738	0.124381	12.521	5.72899e-36	1.02775e-33		AT5G22340
Medtr4g090440	1.55593	0.267661	5.81306	6.13422e-09	6.42844e-08		AT1G11120
Medtr1g044155	1.55542	0.478015	3.25391	0.00113827	0.0041859	PF03479(Domain of unknown function (DUF296))	AT4G14465	AT-hook motif nuclear-localized protein 20
Medtr2g018105	1.55516	0.343369	4.52913	5.92268e-06	3.6341e-05		AT5G45660
Medtr3g108060	1.55503	0.350937	4.43106	9.3769e-06	5.5392e-05	PF01535(PPR repeat)	AT1G77405	Pentatricopeptide repeat (PPR) superfamily protein
Medtr4g028360	1.5548	0.168775	9.21227	3.19298e-20	1.52313e-18		AT2G38540	lipid transfer protein 1
Medtr5g012840	1.55423	0.627799	2.47567	0.0132985	0.0356141	PF08387(FBD)	AT4G26340	F-box/RNI-like/FBD-like domains-containing protein
Medtr5g075370	1.55342	0.403067	3.85401	0.000116201	0.000543772	PF01434(Peptidase family M41)	AT2G26140	FTSH protease 4
Medtr3g115990	1.55299	0.231534	6.70738	1.98154e-11	3.00683e-10		AT1G76405
Medtr1g079525	1.55292	0.10318	15.0506	3.42242e-51	2.21043e-48	PF02037(SAP domain)	AT3G04260	plastid transcriptionally active 3
Medtr7g059080	1.54986	0.665099	2.33027	0.0197917	0.0498089		AT3G24750
Medtr8g061030	1.54977	0.183535	8.44396	3.06771e-17	9.97024e-16	PF00929(Exonuclease)	AT3G15140	Polynucleotidyl transferase, ribonuclease H-like superfamily protein
Medtr4g063220	1.54615	0.202524	7.63441	2.2685e-14	5.14194e-13	PF00125(Core histone H2A/H2B/H3/H4)	AT3G45980	Histone superfamily protein
Medtr3g094040	1.54512	0.446943	3.45709	0.000546051	0.00218388	PF03330(Rare lipoprotein A (RlpA)-like double-psi beta-barrel), PF01357(Pollen allergen)	AT2G40610	expansin A8
Medtr4g101050	1.545	0.266417	5.79917	6.66432e-09	6.9175e-08		AT4G17250
Medtr5g091390	1.54371	0.183111	8.43043	3.44391e-17	1.10741e-15	PF03106(WRKY DNA -binding domain)	AT4G18170	WRKY DNA-binding protein 28
Medtr2g031730	1.54292	0.348008	4.43356	9.26894e-06	5.48017e-05
MT4Noble_015940	1.54273	0.354831	4.34778	1.3752e-05	7.84991e-05
Medtr4g057845	1.54006	0.117769	13.077	4.45765e-39	1.07567e-36		AT3G45050
Medtr4g020530	1.53917	0.469516	3.27822	0.00104466	0.0038756
Medtr3g104920	1.53884	0.377319	4.07837	4.53529e-05	0.000231849	PF00924(Mechanosensitive ion channel)	AT5G12080	mechanosensitive channel of small conductance-like 10
Medtr4g019165	1.53566	0.111205	13.8093	2.23996e-43	7.27132e-41	PF00294(pfkB family carbohydrate kinase)	AT3G54090	fructokinase-like 1
Medtr2g068800	1.53374	0.603125	2.54299	0.0109907	0.0303262	PF03171(2OG-Fe(II) oxygenase superfamily)	AT3G12900	2-oxoglutarate (2OG) and Fe(II)-dependent oxygenase superfamily protein
Medtr4g105220	1.53373	0.265475	5.77731	7.59052e-09	7.80167e-08	PF04864(Allinase)	AT4G24670	tryptophan aminotransferase related 2
Medtr1g031280	1.53342	0.289886	5.28974	1.22493e-07	1.03123e-06	PF07714(Protein tyrosine kinase)	AT4G18250	receptor serine/threonine kinase, putative
Medtr5g024100	1.53342	0.407248	3.76531	0.000166341	0.000750461	PF01535(PPR repeat)	AT4G39530	Tetratricopeptide repeat (TPR)-like superfamily protein
Medtr4g098660	1.5319	0.102186	14.9913	8.36414e-51	5.0683e-48	PF01535(PPR repeat)	AT5G46580	pentatricopeptide (PPR) repeat-containing protein
Medtr2g022490	1.53166	0.572173	2.67692	0.00743015	0.0216069		AT1G03220	Eukaryotic aspartyl protease family protein
Medtr3g035700	1.53139	0.251339	6.09293	1.10861e-09	1.31187e-08	PF00181(Ribosomal Proteins L2, RNA binding domain)	ATCG00830	ribosomal protein L2
Medtr4g084630	1.53095	0.132347	11.5677	6.00485e-31	7.58056e-29	PF02536(mTERF)	AT4G38160	Mitochondrial transcription termination factor family protein
Medtr4g133740	1.52989	0.142169	10.761	5.25717e-27	4.74677e-25	PF01535(PPR repeat)	AT4G16390	pentatricopeptide (PPR) repeat-containing protein
Medtr5g048470	1.52825	0.167032	9.1495	5.71988e-20	2.60819e-18	PF03171(2OG-Fe(II) oxygenase superfamily)	AT1G17020	senescence-related gene 1
Medtr3g062920	1.52738	0.118235	12.9181	3.55653e-38	7.57652e-36	PF10674(Protein of unknown function (DUF2488))	AT5G58250
Medtr4g008180	1.52631	0.377477	4.04345	5.26712e-05	0.00026622		AT1G53025	Ubiquitin-conjugating enzyme family protein
Medtr4g005960	1.52596	0.32994	4.62496	3.74665e-06	2.39652e-05	PF04627(Mitochondrial ATP synthase epsilon chain)	AT1G51650	ATP synthase epsilon chain, mitochondrial
Medtr3g051220	1.5252	0.434828	3.50759	0.000452181	0.00185025	PF10520(B domain of TMEM189, localisation domain)	AT4G27030	fatty acid desaturase A
Medtr4g126120	1.5238	0.18271	8.34	7.42882e-17	2.27095e-15	PF12146(Serine aminopeptidase, S33), PF08840(BAAT / Acyl-CoA thioester hydrolase C terminal)	AT3G47590	alpha/beta-Hydrolases superfamily protein
Medtr2g036650	1.5236	0.569453	2.67555	0.00746071	0.0216886	PF00702(haloacid dehalogenase-like hydrolase), PF00690(Cation transporter/ATPase, N-terminus), PF00122(E1-E2 ATPase)	AT4G30190	H()-ATPase 2
Medtr4g063720	1.52295	0.297018	5.12746	2.93677e-07	2.31445e-06	PF00012(Hsp70 protein)	AT3G12580	heat shock protein 70
Medtr4g082810	1.52287	0.255644	5.95699	2.56928e-09	2.86892e-08	PF00201(UDP-glucoronosyl and UDP-glucosyl transferase)	AT3G16520	UDP-glucosyl transferase 88A1
Medtr4g087120	1.52237	0.396825	3.83638	0.00012486	0.000578929	PF03171(2OG-Fe(II) oxygenase superfamily)	AT3G19000	2-oxoglutarate (2OG) and Fe(II)-dependent oxygenase superfamily protein
Medtr4g104030	1.52103	0.133666	11.3793	5.30329e-30	6.10169e-28	PF00334(Nucleoside diphosphate kinase)	AT5G63310	nucleoside diphosphate kinase 2
Medtr2g102730	1.51986	0.311438	4.88014	1.06009e-06	7.56322e-06	PF03000(NPH3 family)	AT3G15570	Phototropic-responsive NPH3 family protein
Medtr5g019030	1.51941	0.508231	2.9896	0.00279345	0.00922512	PF01535(PPR repeat)	AT5G66631	Tetratricopeptide repeat (TPR)-like superfamily protein
Medtr4g072340	1.51939	0.639737	2.37503	0.0175478	0.0450303	PF00112(Papain family cysteine protease), PF08246(Cathepsin propeptide inhibitor domain (I29))	AT4G39090	Papain family cysteine protease
Medtr5g013080	1.51887	0.56923	2.66829	0.00762394	0.0220854		AT4G16807
Medtr4g076230	1.5168	0.116609	13.0075	1.10882e-38	2.5842e-36	PF03435(Saccharopine dehydrogenase NADP binding domain)	AT1G50450	Saccharopine dehydrogenase
Medtr3g479610	1.51619	0.115538	13.1228	2.43733e-39	6.04191e-37	PF00201(UDP-glucoronosyl and UDP-glucosyl transferase)	AT1G22380	UDP-glucosyl transferase 85A3
Medtr4g107620	1.5159	0.275893	5.49454	3.91729e-08	3.60137e-07	PF00069(Protein kinase domain), PF08263(Leucine rich repeat N-terminal domain), PF00560(Leucine Rich Repeat)	AT5G62710	Leucine-rich repeat protein kinase family protein
Medtr0105s0070	1.51482	0.643066	2.35562	0.0184919	0.0469801	PF05142(Domain of unknown function (DUF702) )	AT2G21400	SHI-related sequence3
Medtr2g099910	1.51431	0.096536	15.6864	1.87281e-55	1.70226e-52	PF03446(NAD binding domain of 6-phosphogluconate dehydrogenase)	AT1G17650	glyoxylate reductase 2
Medtr3g013430	1.51346	0.327353	4.62334	3.77602e-06	2.41248e-05	PF01633(Choline/ethanolamine kinase)	AT1G74320	Protein kinase superfamily protein
Medtr7g094760	1.51316	0.242346	6.24379	4.27085e-10	5.38407e-09	PF01657(Salt stress response/antifungal)	AT1G61750	Receptor-like protein kinase-related family protein
Medtr3g117620	1.51261	0.293113	5.16052	2.46266e-07	1.96447e-06	PF01535(PPR repeat)	AT3G12770	mitochondrial editing factor 22
Medtr6g065550	1.51198	0.461542	3.27593	0.00105316	0.0039029		AT2G27280	Coiled-coil domain-containing protein 55 (DUF2040)
Medtr7g082680	1.51172	0.202361	7.47038	7.99621e-14	1.68632e-12
Medtr4g083440	1.51154	0.140375	10.7679	4.88069e-27	4.42148e-25	PF05742(Transport and Golgi organisation 2)	AT4G38260	Protein of unknown function (DUF833)
Medtr5g087960	1.51068	0.338205	4.46675	7.94168e-06	4.75211e-05	PF01575(MaoC like domain)	AT5G60335	Thioesterase superfamily protein
Medtr3g073140	1.50996	0.141721	10.6544	1.66281e-26	1.43033e-24	PF00416(Ribosomal protein S13/S18)	AT5G14320	Ribosomal protein S13/S18 family
Medtr8g464870	1.50981	0.343607	4.39402	1.11275e-05	6.47377e-05	PF00931(NB-ARC domain)	AT4G27190	NB-ARC domain-containing disease resistance protein
Medtr1g088640	1.509	0.289381	5.21459	1.84225e-07	1.50538e-06	PF00582(Universal stress protein family)	AT2G47710	Adenine nucleotide alpha hydrolases-like superfamily protein
Medtr2g014430	1.50775	0.248465	6.06826	1.29302e-09	1.51778e-08		AT2G33855
Medtr5g024260	1.50738	0.360291	4.18378	2.86699e-05	0.000153109		AT3G06240	F-box family protein
Medtr2g026635	1.50666	0.125666	11.9894	4.03743e-33	6.01599e-31	PF01535(PPR repeat)	AT4G16390	pentatricopeptide (PPR) repeat-containing protein
Medtr3g479620	1.50632	0.157101	9.58824	8.96025e-22	4.88656e-20		AT1G22370	UDP-glucosyl transferase 85A5
Medtr2g088350	1.50305	0.357314	4.20654	2.5931e-05	0.000139934	PF00271(Helicase conserved C-terminal domain)	AT3G22750	Protein kinase superfamily protein
Medtr8g107710	1.50257	0.621161	2.41897	0.0155645	0.0406993
Medtr3g106420	1.50254	0.368433	4.07819	4.53869e-05	0.000231936	PF01145(SPFH domain / Band 7 family)	AT5G25260	SPFH/Band 7/PHB domain-containing membrane-associated protein family
Medtr8g099720	1.49877	0.108566	13.8051	2.3739e-43	7.61547e-41	PF01250(Ribosomal protein S6)	AT1G64510	Translation elongation factor EF1B/ribosomal protein S6 family protein
Medtr8g103220	1.4966	0.49181	3.04304	0.00234199	0.00791146
Medtr6g465530	1.49546	0.49358	3.02983	0.00244692	0.00822719	PF00847(AP2 domain)	AT4G25470	C-repeat/DRE binding factor 2
Medtr5g080580	1.4954	0.197173	7.58419	3.34573e-14	7.42927e-13	PF03479(Domain of unknown function (DUF296))	AT4G14465	AT-hook motif nuclear-localized protein 20
Medtr2g007690	1.49514	0.171903	8.69756	3.39087e-18	1.2411e-16	PF03470(XS zinc finger domain), PF03468(XS domain)	AT5G23570	XS domain-containing protein / XS zinc finger domain-containing protein-related
Medtr5g083530	1.49462	0.302745	4.93691	7.93699e-07	5.83358e-06	PF02153(Prephenate dehydrogenase)	AT5G34930	arogenate dehydrogenase
Medtr1g069275	1.49249	0.485417	3.07465	0.00210752	0.00719877	PF00743(Flavin-binding monooxygenase-like)	AT4G28720	Flavin-binding monooxygenase family protein
Medtr6g048300	1.49037	0.24591	6.06064	1.35579e-09	1.58372e-08	PF01656(CobQ/CobB/MinD/ParA nucleotide binding domain)	AT5G24020	septum site-determining protein (MIND)
Medtr8g090185	1.48966	0.120172	12.3961	2.7447e-35	4.70707e-33	PF00831(Ribosomal L29 protein)	AT5G65220	Ribosomal L29 family protein
MT4Noble_026712	1.48935	0.359978	4.13734	3.51356e-05	0.000183751
Medtr8g014580	1.48902	0.351972	4.23052	2.33147e-05	0.000126895	PF00612(IQ calmodulin-binding motif)	AT3G16490	IQ-domain 26
Medtr7g108210	1.4883	0.458738	3.24434	0.00117724	0.00430943	PF00462(Glutaredoxin)	AT3G62950	Thioredoxin superfamily protein
Medtr2g437240	1.48743	0.341017	4.36175	1.29027e-05	7.41166e-05	PF02536(mTERF)	AT5G07900	Mitochondrial transcription termination factor family protein
Medtr1g046790	1.48737	0.23175	6.41803	1.38053e-10	1.86173e-09	PF02110(Hydroxyethylthiazole kinase family)	AT3G24030	hydroxyethylthiazole kinase family protein
Medtr8g028375	1.48678	0.474029	3.13647	0.00170995	0.00599934
MT4Noble_002654	1.48484	0.45207	3.28453	0.00102151	0.00380007
Medtr8g086820	1.4845	0.3012	4.92864	8.28052e-07	6.06645e-06	PF07939(Protein of unknown function (DUF1685))	AT2G42760
Medtr4g053250	1.48369	0.628927	2.35908	0.0183205	0.0466466	PF00170(bZIP transcription factor)	AT1G08320	bZIP transcription factor family protein
Medtr3g096750	1.48319	0.189101	7.84342	4.38455e-15	1.07807e-13	PF01789(PsbP)	AT2G28605	Photosystem II reaction center PsbP family protein
Medtr4g104540	1.48179	0.260991	5.67754	1.36648e-08	1.34809e-07	PF00067(Cytochrome P450)	AT3G48280	cytochrome P450, family 71, subfamily A, polypeptide 25
Medtr4g019900	1.47998	0.156312	9.46812	2.84933e-21	1.46319e-19	PF12043(Domain of unknown function (DUF3527))	AT5G01030	Protein of unknown function (DUF3527)
Medtr8g028145	1.47949	0.163239	9.06335	1.26501e-19	5.50146e-18	PF01113(Dihydrodipicolinate reductase, N-terminus), PF05173(Dihydrodipicolinate reductase, C-terminus)	AT3G59890	Dihydrodipicolinate reductase, bacterial/plant
Medtr4g099510	1.47933	0.591355	2.5016	0.0123633	0.0335311	PF01764(Lipase (class 3))	AT4G16820	alpha/beta-Hydrolases superfamily protein
Medtr4g094365	1.47917	0.475842	3.10853	0.00188022	0.00651709	PF00646(F-box domain)	AT3G06240	F-box family protein
Medtr1g076310	1.47819	0.0997133	14.8244	1.01849e-49	5.55445e-47	PF00886(Ribosomal protein S16)	AT4G34620	small subunit ribosomal protein 16
Medtr4g092620	1.4766	0.138542	10.6582	1.59689e-26	1.38235e-24	PF00155(Aminotransferase class I and II)	AT4G33680	Pyridoxal phosphate (PLP)-dependent transferases superfamily protein
Medtr8g088160	1.47642	0.231595	6.37504	1.82917e-10	2.4307e-09	PF00248(Aldo/keto reductase family)	AT1G04420	NAD(P)-linked oxidoreductase superfamily protein
Medtr0054s0140	1.47611	0.300852	4.90643	9.27486e-07	6.72803e-06	PF01535(PPR repeat)	AT1G12700	ATP binding;nucleic acid binding;helicases
Medtr4g089055	1.47515	0.248083	5.94619	2.74448e-09	3.0533e-08	PF00067(Cytochrome P450)	AT3G48270	cytochrome P450, family 71, subfamily A, polypeptide 26
Medtr6g091960	1.47511	0.269073	5.4822	4.20072e-08	3.83864e-07		AT1G79350	RING/FYVE/PHD zinc finger superfamily protein
Medtr4g085900	1.47474	0.109459	13.473	2.25371e-41	6.27082e-39	PF01965(DJ-1/PfpI family)	AT4G34020	Class I glutamine amidotransferase-like superfamily protein
Medtr8g076320	1.47469	0.301817	4.88604	1.02882e-06	7.36736e-06
Medtr8g086060	1.47365	0.13876	10.6201	2.40195e-26	2.04038e-24		AT4G28590
Medtr3g466790	1.47361	0.556581	2.64761	0.00810623	0.0232723	PF03330(Rare lipoprotein A (RlpA)-like double-psi beta-barrel), PF01357(Pollen allergen)	AT2G40610	expansin A8
Medtr3g061430	1.4717	0.532604	2.76322	0.00572335	0.0172294		AT3G11010	receptor like protein 34
Medtr8g007375	1.47141	0.113448	12.9699	1.81247e-38	4.01808e-36	PF01535(PPR repeat)	AT1G02150	Tetratricopeptide repeat (TPR)-like superfamily protein
Medtr5g092630	1.47102	0.201481	7.30107	2.85485e-13	5.63694e-12	PF01582(TIR domain)	AT3G25510	disease resistance protein (TIR-NBS-LRR class), putative
Medtr7g077160	1.46954	0.532068	2.76195	0.00574581	0.0172913	PF00228(Bowman-Birk serine protease inhibitor family)
Medtr5g073180	1.46921	0.179408	8.1892	2.6297e-16	7.50855e-15
Medtr2g044440	1.46608	0.551175	2.65991	0.00781608	0.0225581	PF00097(Zinc finger, C3HC4 type (RING finger)), PF01485(IBR domain, a half RING-finger domain)	AT3G53690	RING/U-box superfamily protein
Medtr7g118230	1.46479	0.214721	6.82184	8.98843e-12	1.43331e-10	PF00076(RNA recognition motif. (a.k.a. RRM, RBD, or RNP domain))	AT1G01080	RNA-binding (RRM/RBD/RNP motifs) family protein
Medtr4g130320	1.46411	0.59804	2.44818	0.014358	0.0380368
Medtr3g101930	1.46363	0.25889	5.6535	1.57213e-08	1.53541e-07	PF02458(Transferase family)	AT5G42830	HXXXD-type acyl-transferase family protein
Medtr5g086810	1.46311	0.326512	4.48102	7.42883e-06	4.46956e-05	PF00560(Leucine Rich Repeat), PF08263(Leucine rich repeat N-terminal domain)	AT1G47890	receptor like protein 7
Medtr2g026645	1.46203	0.19256	7.5926	3.13547e-14	6.97373e-13	PF01535(PPR repeat)	AT4G16390	pentatricopeptide (PPR) repeat-containing protein
Medtr2g086300	1.46061	0.513835	2.84257	0.00447514	0.013904	PF00561(alpha/beta hydrolase fold)	AT3G44510	alpha/beta-Hydrolases superfamily protein
Medtr2g435650	1.46051	0.221504	6.59359	4.29304e-11	6.18724e-10
Medtr3g106850	1.45938	0.49825	2.92901	0.0034004	0.0109601	PF02309(AUX/IAA family)	AT4G32280	indole-3-acetic acid inducible 29
Medtr4g106410	1.45902	0.190897	7.64296	2.12289e-14	4.836e-13	PF02527(rRNA small subunit methyltransferase G)	AT5G50110	S-adenosyl-L-methionine-dependent methyltransferases superfamily protein
Medtr2g076340	1.45812	0.123328	11.8231	2.96464e-32	4.08392e-30	PF01208(Uroporphyrinogen decarboxylase (URO-D))	AT3G14930	Uroporphyrinogen decarboxylase
Medtr5g072510	1.45709	0.194467	7.49275	6.74428e-14	1.43786e-12	PF04852(Protein of unknown function (DUF640))	AT1G07090	Protein of unknown function (DUF640)
MT4Noble_019825	1.4569	0.33767	4.31457	1.59913e-05	8.99447e-05
Medtr0252s0060	1.45637	0.50741	2.87019	0.0041022	0.0129045	PF01535(PPR repeat)	AT3G48250	Pentatricopeptide repeat (PPR) superfamily protein
Medtr1g030268	1.45313	0.344331	4.22017	2.44115e-05	0.000132442	PF00657(GDSL-like Lipase/Acylhydrolase)	AT3G26430	GDSL-like Lipase/Acylhydrolase superfamily protein
Medtr4g094562	1.45309	0.198396	7.3242	2.4033e-13	4.79044e-12	PF07712(Stress up-regulated Nod 19)	AT5G61820
Medtr1g094190	1.45132	0.0939949	15.4404	8.75246e-54	6.81892e-51	PF01479(S4 domain), PF00849(RNA pseudouridylate synthase)	AT2G39140	pseudouridine synthase family protein
Medtr5g012050	1.45076	0.309366	4.68947	2.73916e-06	1.81202e-05		AT4G12400	stress-inducible protein, putative
Medtr5g074640	1.45017	0.184134	7.87562	3.39054e-15	8.48195e-14	PF01416(tRNA pseudouridine synthase)	AT2G30320	Pseudouridine synthase family protein
Medtr6g034205	1.4484	0.121957	11.8763	1.57164e-32	2.23205e-30	PF11341(Protein of unknown function (DUF3143))	AT5G52960
Medtr1g102860	1.44837	0.51915	2.78989	0.00527256	0.0160353	PF00447(HSF-type DNA-binding)	AT3G22830	heat shock transcription factor A6B
Medtr7g110370	1.44821	0.191994	7.54299	4.59311e-14	1.00116e-12		AT4G12560	F-box and associated interaction domains-containing protein
Medtr2g031560	1.44745	0.290499	4.98264	6.27233e-07	4.67689e-06	PF01565(FAD binding domain ), PF08031(Berberine and berberine like )	AT1G30700	FAD-binding Berberine family protein
Medtr3g012080	1.44692	0.286042	5.0584	4.22784e-07	3.24929e-06		AT3G07040	NB-ARC domain-containing disease resistance protein
Medtr7g113930	1.44686	0.206019	7.02295	2.17228e-12	3.77526e-11	PF12166(Piezo non-specific cation channel, R-Ras-binding domain)	AT2G48060
Medtr7g015750	1.44612	0.299478	4.8288	1.37358e-06	9.60874e-06	PF00069(Protein kinase domain)	AT3G51550	Malectin/receptor-like protein kinase family protein
Medtr7g023690	1.4451	0.175509	8.23373	1.81467e-16	5.30928e-15	PF08263(Leucine rich repeat N-terminal domain), PF00560(Leucine Rich Repeat)	AT5G06860	polygalacturonase inhibiting protein 1
Medtr5g079715	1.4444	0.426313	3.38811	0.000703756	0.00273401
Medtr1g107155	1.44339	0.509474	2.8331	0.00460985	0.0142826		AT1G30600	Subtilase family protein
Medtr1g060890	1.44259	0.280412	5.14452	2.68207e-07	2.12724e-06		AT5G03670
Medtr1g046510	1.44053	0.14834	9.71101	2.70642e-22	1.57019e-20	PF02110(Hydroxyethylthiazole kinase family)	AT3G24030	hydroxyethylthiazole kinase family protein
Medtr4g020090	1.44003	0.12927	11.1397	8.03909e-29	8.4637e-27	PF00156(Phosphoribosyl transferase domain)	AT3G53900	uracil phosphoribosyltransferase
Medtr5g011800	1.43842	0.269054	5.34621	8.98131e-08	7.77468e-07	PF07279(Protein of unknown function (DUF1442))	AT2G45360	Protein of unknown function (DUF1442)
Medtr5g017160	1.43723	0.234911	6.1182	9.46401e-10	1.12939e-08	PF05498(Rapid ALkalinization Factor (RALF) )	AT5G67070	ralf-like 34
Medtr3g074610	1.43643	0.156023	9.20655	3.36768e-20	1.59704e-18	PF00481(Protein phosphatase 2C)	AT1G34750	Protein phosphatase 2C family protein
Medtr8g099765	1.43615	0.403571	3.55861	0.000372827	0.00155115
Medtr1g026100	1.43597	0.39065	3.67585	0.000237054	0.0010311		AT1G76065	LYR family of Fe/S cluster biogenesis protein
Medtr4g095065	1.4353	0.154283	9.30306	1.36458e-20	6.68034e-19	PF01535(PPR repeat)	AT4G37380	Tetratricopeptide repeat (TPR)-like superfamily protein
Medtr3g450510	1.43241	0.213445	6.71091	1.93409e-11	2.94136e-10	PF00494(Squalene/phytoene synthase)	AT5G17230	PHYTOENE SYNTHASE
Medtr0189s0010	1.43209	0.571638	2.50524	0.0122369	0.0332413	PF00069(Protein kinase domain)	AT4G36950	mitogen-activated protein kinase kinase kinase 21
Medtr4g112370	1.43111	0.23555	6.07559	1.23532e-09	1.45255e-08	PF04759(Protein of unknown function, DUF617)	AT5G23100	Protein of unknown function, DUF617
Medtr7g055710	1.43031	0.383962	3.72512	0.000195221	0.000866737	PF00201(UDP-glucoronosyl and UDP-glucosyl transferase)	AT4G34131	UDP-glucosyl transferase 73B3
Medtr8g076220	1.42794	0.116359	12.2718	1.28335e-34	2.09547e-32	PF11833(Protein of unknown function (DUF3353))	AT3G51140	Protein of unknown function (DUF3353)
Medtr5g040920	1.42665	0.166873	8.54927	1.23875e-17	4.21173e-16	PF01535(PPR repeat)	AT2G02980	Pentatricopeptide repeat (PPR) superfamily protein
Medtr1g070220	1.42544	0.350433	4.06764	4.74916e-05	0.000241966	PF03195(Protein of unknown function DUF260)	AT2G42430	lateral organ boundaries-domain 16
Medtr3g105050	1.42522	0.113633	12.5423	4.37926e-36	7.96091e-34		AT2G26340
Medtr1g088980	1.42513	0.131861	10.8078	3.16274e-27	2.92344e-25	PF00089(Trypsin)	AT2G47940	DEGP protease 2
Medtr7g019140	1.42467	0.407477	3.49632	0.000471723	0.00192156		AT5G15900	TRICHOME BIREFRINGENCE-LIKE 19
Medtr4g099010	1.42206	0.59888	2.37453	0.0175713	0.045078	PF04043(Plant invertase/pectin methylesterase inhibitor)	AT5G46960	Plant invertase/pectin methylesterase inhibitor superfamily protein
Medtr3g020780	1.42089	0.289756	4.90375	9.40239e-07	6.80968e-06	PF00067(Cytochrome P450)	AT5G06900	cytochrome P450, family 93, subfamily D, polypeptide 1
Medtr1g095920	1.4203	0.122438	11.6001	4.11405e-31	5.24215e-29	PF02686(Glu-tRNAGln amidotransferase C subunit)	AT4G32915
Medtr7g014510	1.41958	0.291298	4.8733	1.09752e-06	7.80981e-06	PF08100(Dimerisation domain), PF00891(O-methyltransferase)	AT4G35150	O-methyltransferase family protein
Medtr5g019780	1.419	0.433064	3.27666	0.00105043	0.00389437	PF00190(Cupin)	AT4G36700	RmlC-like cupins superfamily protein
Medtr7g088330	1.41803	0.140374	10.1017	5.42679e-24	3.71803e-22	PF00067(Cytochrome P450)	AT3G56630	cytochrome P450, family 94, subfamily D, polypeptide 2
Medtr8g033390	1.41785	0.256024	5.53795	3.06028e-08	2.86565e-07	PF00389(D-isomer specific 2-hydroxyacid dehydrogenase, catalytic domain), PF02826(D-isomer specific 2-hydroxyacid dehydrogenase, NAD binding domain)	AT2G45630	D-isomer specific 2-hydroxyacid dehydrogenase family protein
Medtr8g465340	1.41766	0.289339	4.89964	9.60122e-07	6.92975e-06	PF00069(Protein kinase domain), PF00560(Leucine Rich Repeat), PF08263(Leucine rich repeat N-terminal domain)	AT3G47570	Leucine-rich repeat protein kinase family protein
Medtr5g036660	1.41685	0.269862	5.2503	1.51852e-07	1.25972e-06	PF08148(DSHCT (NUC185) domain), PF00270(DEAD/DEAH box helicase), PF00271(Helicase conserved C-terminal domain)	AT1G70070	DEAD/DEAH box helicase, putative
Medtr4g119790	1.41627	0.341497	4.14726	3.36484e-05	0.000176889		AT5G24860	flowering promoting factor 1
Medtr1g115295	1.41553	0.0980231	14.4407	2.86813e-47	1.2821e-44	PF09334(tRNA synthetases class I (M)), PF08264(Anticodon-binding domain of tRNA)	AT3G55400	methionyl-tRNA synthetase / methionine--tRNA ligase / MetRS (cpMetRS)
Medtr1g096460	1.41356	0.0845101	16.7265	8.39899e-63	1.20539e-59	PF00829(Ribosomal prokaryotic L21 protein)	AT1G35680	Ribosomal protein L21
Medtr5g004970	1.41137	0.259346	5.44205	5.26703e-08	4.73685e-07		AT3G19508
Medtr4g021057	1.41122	0.274013	5.15018	2.60234e-07	2.07003e-06	PF01582(TIR domain), PF00931(NB-ARC domain)	AT5G36930	Disease resistance protein (TIR-NBS-LRR class) family
Medtr4g047920	1.41113	0.376069	3.75233	0.000175199	0.000786548	PF00181(Ribosomal Proteins L2, RNA binding domain), PF00276(Ribosomal protein L23)	ATCG00830	ribosomal protein L2
Medtr8g077125	1.40964	0.0793316	17.769	1.22957e-70	2.79399e-67	PF01926(50S ribosome-binding GTPase), PF07650(KH domain)	AT5G66470	RNA binding;GTP binding
Medtr5g464810	1.40888	0.224869	6.26535	3.71982e-10	4.73982e-09	PF00201(UDP-glucoronosyl and UDP-glucosyl transferase)	AT1G22360	UDP-glucosyl transferase 85A2
Medtr4g134280	1.40668	0.162385	8.66261	4.6109e-18	1.6653e-16	PF00332(Glycosyl hydrolases family 17), PF07983(X8 domain)	AT4G17180	O-Glycosyl hydrolases family 17 protein
Medtr2g101380	1.40575	0.238586	5.89202	3.81495e-09	4.12638e-08	PF00111(2Fe-2S iron-sulfur cluster binding domain)	AT3G16250	NDH-dependent cyclic electron flow 1
Medtr8g054450	1.40519	0.101872	13.7937	2.78197e-43	8.71941e-41	PF00572(Ribosomal protein L13)	AT1G78630	Ribosomal protein L13 family protein
Medtr7g089950	1.40519	0.419433	3.35022	0.000807469	0.00308376	PF01504(Phosphatidylinositol-4-phosphate 5-Kinase), PF02493(MORN repeat)	AT3G56960	phosphatidyl inositol monophosphate 5 kinase 4
Medtr1g028350	1.40465	0.357291	3.93138	8.44597e-05	0.000406468
Medtr1g027150	1.40383	0.365848	3.83718	0.000124454	0.000577634	PF07714(Protein tyrosine kinase)	AT1G67000	Protein kinase superfamily protein
Medtr3g078613	1.40318	0.244416	5.74096	9.41417e-09	9.49706e-08	PF00072(Response regulator receiver domain)	AT3G48100	response regulator 5
Medtr8g059425	1.40237	0.217991	6.43317	1.24967e-10	1.69701e-09	PF00201(UDP-glucoronosyl and UDP-glucosyl transferase)	AT1G22400	UDP-Glycosyltransferase superfamily protein
Medtr4g078555	1.40233	0.580844	2.4143	0.0157656	0.0411543	PF08311(Mad3/BUB1 homology region 1), PF00069(Protein kinase domain)	AT2G20635	ATP binding;protein kinases;protein serine/threonine kinases
Medtr1g110750	1.40222	0.0795431	17.6285	1.48873e-69	3.12266e-66	PF00828(Ribosomal protein L18e/L15)	AT3G25920	ribosomal protein L15
Medtr0017s0200	1.40066	0.386364	3.62524	0.000288696	0.00123349
Medtr7g082550	1.39794	0.366223	3.81718	0.000134988	0.000621241	PF01535(PPR repeat)	AT2G37320	Tetratricopeptide repeat (TPR)-like superfamily protein
Medtr7g078800	1.39783	0.0987718	14.1522	1.81118e-45	7.15756e-43	PF00281(Ribosomal protein L5), PF00673(ribosomal L5P family C-terminus)	AT4G01310	Ribosomal L5P family protein
Medtr5g044990	1.39754	0.112875	12.3813	3.29792e-35	5.51703e-33	PF00294(pfkB family carbohydrate kinase)	AT1G69200	fructokinase-like 2
MT4Noble_022590	1.39631	0.123314	11.3232	1.00729e-29	1.1397e-27
Medtr2g033020	1.39377	0.10399	13.4029	5.81184e-41	1.60078e-38	PF00575(S1 RNA binding domain)	AT5G30510	ribosomal protein S1
Medtr0229s0020	1.39345	0.294952	4.72432	2.30892e-06	1.54578e-05	PF01396(Topoisomerase DNA binding C4 zinc finger)	AT4G31210	DNA topoisomerase, type IA, core
Medtr3g084200	1.39288	0.354172	3.93277	8.39715e-05	0.000404404	PF02519(Auxin responsive protein)	AT4G38840	SAUR-like auxin-responsive protein family
Medtr2g083420	1.3928	0.337658	4.12488	3.7093e-05	0.000193173	PF00201(UDP-glucoronosyl and UDP-glucosyl transferase)	AT5G54010	UDP-Glycosyltransferase superfamily protein
MT4Noble_037292	1.39244	0.165278	8.42481	3.61326e-17	1.15641e-15
Medtr2g036430	1.39177	0.269576	5.16283	2.43242e-07	1.94223e-06	PF00069(Protein kinase domain)	AT1G34300	lectin protein kinase family protein
Medtr5g088880	1.39094	0.31557	4.4077	1.04474e-05	6.11702e-05	PF00112(Papain family cysteine protease)	AT4G11310	Papain family cysteine protease
Medtr4g008160	1.38999	0.132488	10.4915	9.45536e-26	7.55885e-24	PF00327(Ribosomal protein L30p/L7e), PF08079(Ribosomal L30 N-terminal domain)	AT3G13580	Ribosomal protein L30/L7 family protein
Medtr6g008055	1.38978	0.232733	5.97154	2.35024e-09	2.63839e-08	PF01764(Lipase (class 3))	AT5G14930	senescence-associated gene 101
Medtr3g114680	1.38929	0.426179	3.25988	0.00111459	0.00410656
Medtr3g057910	1.38823	0.161486	8.59658	8.21258e-18	2.88583e-16	PF00067(Cytochrome P450)	AT3G26330	cytochrome P450, family 71, subfamily B, polypeptide 37
Medtr3g023160	1.3878	0.165271	8.39709	4.57672e-17	1.43611e-15		AT4G31560	high chlorophyll fluorescence 153
Medtr5g021250	1.38755	0.575582	2.41068	0.0159226	0.0414925
Medtr1g018910	1.38727	0.376105	3.68851	0.000225573	0.000985409		AT4G06744	Leucine-rich repeat (LRR) family protein
Medtr5g064240	1.38716	0.225438	6.15319	7.59407e-10	9.187e-09	PF00201(UDP-glucoronosyl and UDP-glucosyl transferase)	AT1G22360	UDP-glucosyl transferase 85A2
Medtr2g069680	1.38452	0.0833047	16.62	4.99274e-62	6.80711e-59	PF01535(PPR repeat)	AT1G79080	Pentatricopeptide repeat (PPR) superfamily protein
Medtr3g019320	1.38439	0.110907	12.4824	9.31025e-36	1.65234e-33		AT1G50900	Ankyrin repeat family protein
Medtr8g028565	1.38293	0.312015	4.43226	9.32487e-06	5.51085e-05	PF03106(WRKY DNA -binding domain)	AT4G01250	WRKY family transcription factor
Medtr4g015010	1.38212	0.104788	13.1897	1.00563e-39	2.56275e-37		AT3G09050
Medtr1g026340	1.38118	0.501894	2.75193	0.00592456	0.0177509	PF01535(PPR repeat)	AT1G76280	Tetratricopeptide repeat (TPR)-like superfamily protein
Medtr5g030900	1.38087	0.101975	13.5413	8.92444e-42	2.5616e-39		AT4G37920
Medtr4g088405	1.37998	0.151797	9.091	9.81294e-20	4.31579e-18	PF00067(Cytochrome P450)	AT4G31940	cytochrome P450, family 82, subfamily C, polypeptide 4
MT4Noble_001223	1.37961	0.484964	2.84476	0.00444445	0.013822
Medtr2g101770	1.37758	0.094436	14.5874	3.37813e-48	1.64491e-45	PF00366(Ribosomal protein S17)	AT1G79850	ribosomal protein S17
Medtr1g013090	1.37617	0.294429	4.67405	2.95321e-06	1.93794e-05	PF00240(Ubiquitin family)	AT4G03430	pre-mRNA splicing factor-related
Medtr5g009810	1.37545	0.10637	12.9308	3.0156e-38	6.52615e-36	PF01169(Uncharacterized protein family UPF0016)	AT1G64150	Uncharacterized protein family (UPF0016)
Medtr1g016210	1.37461	0.53847	2.5528	0.0106861	0.0295898	PF00931(NB-ARC domain)	AT3G07040	NB-ARC domain-containing disease resistance protein
Medtr8g069820	1.3742	0.201223	6.82923	8.53699e-12	1.36692e-10		AT5G62960
Medtr8g015680	1.37138	0.399252	3.43487	0.000592839	0.00234964	PF00646(F-box domain)	AT3G58860	F-box/RNI-like superfamily protein
Medtr4g115070	1.3712	0.155757	8.80347	1.32654e-18	5.17042e-17	PF04724(Glycosyltransferase family 17)	AT2G13290	beta-1,4-N-acetylglucosaminyltransferase family protein
Medtr4g012810	1.3707	0.13113	10.453	1.41954e-25	1.1123e-23		AT3G24506
Medtr4g095700	1.37063	0.36036	3.80351	0.000142663	0.000653254	PF00583(Acetyltransferase (GNAT) family)	AT2G23060	Acyl-CoA N-acyltransferases (NAT) superfamily protein
Medtr6g018390	1.3701	0.238324	5.74892	8.98151e-09	9.09429e-08	PF03478(Protein of unknown function (DUF295))	AT2G17036	F-box family protein with a domain of unknown function (DUF295)
Medtr1g043810	1.37	0.495728	2.76361	0.00571655	0.0172128	PF03171(2OG-Fe(II) oxygenase superfamily)	AT1G06620	2-oxoglutarate (2OG) and Fe(II)-dependent oxygenase superfamily protein
Medtr3g090350	1.36904	0.356051	3.84508	0.000120512	0.000561526	PF05678(VQ motif)	AT1G21326	VQ motif-containing protein
Medtr1g114220	1.36629	0.295186	4.6286	3.68154e-06	2.35819e-05	PF01535(PPR repeat)	AT5G08305	Pentatricopeptide repeat (PPR) superfamily protein
Medtr3g093430	1.36591	0.398946	3.42379	0.000617551	0.00243309	PF00664(ABC transporter transmembrane region), PF00005(ABC transporter)	AT3G28860	ATP binding cassette subfamily B19
Medtr7g093900	1.36537	0.286612	4.76381	1.89967e-06	1.29242e-05	PF01535(PPR repeat)	AT2G22410	SLOW GROWTH 1
Medtr7g076840	1.36477	0.550004	2.48138	0.0130877	0.03516	PF00010(Helix-loop-helix DNA-binding domain)	AT5G65640	beta HLH protein 93
Medtr5g090630	1.3645	0.278134	4.90591	9.29942e-07	6.74406e-06	PF00201(UDP-glucoronosyl and UDP-glucosyl transferase)	AT3G21760	UDP-Glycosyltransferase superfamily protein
Medtr3g030250	1.3638	0.367724	3.70876	0.000208278	0.000918094	PF00646(F-box domain)	AT3G23880	F-box and associated interaction domains-containing protein
Medtr3g047930	1.36348	0.169992	8.02085	1.05013e-15	2.75866e-14		AT3G51690	PIF1 helicase
Medtr4g094832	1.36288	0.282925	4.81709	1.4567e-06	1.01367e-05	PF02458(Transferase family)	AT5G67150	HXXXD-type acyl-transferase family protein
Medtr4g080330	1.36271	0.206471	6.60001	4.11126e-11	5.95465e-10	PF01582(TIR domain), PF00560(Leucine Rich Repeat), PF00931(NB-ARC domain)	AT5G17680	disease resistance protein (TIR-NBS-LRR class), putative
Medtr3g118290	1.36263	0.0715444	19.046	7.0943e-81	2.41809e-77	PF04542(Sigma-70 region 2 ), PF04545(Sigma-70, region 4), PF04539(Sigma-70 region 3)	AT1G08540	RNApolymerase sigma subunit 2
Medtr1g032560	1.36209	0.203576	6.69084	2.21899e-11	3.33735e-10		AT2G01755
Medtr0373s0040	1.36199	0.439106	3.10173	0.00192395	0.00664837	PF00931(NB-ARC domain)	AT5G36930	Disease resistance protein (TIR-NBS-LRR class) family
Medtr8g103233	1.36131	0.555214	2.45186	0.0142119	0.0377084	PF00854(POT family)	AT3G16180	Major facilitator superfamily protein
Medtr5g098800	1.36119	0.0988769	13.7665	4.05439e-43	1.22839e-40	PF01218(Coproporphyrinogen III oxidase)	AT1G03475	Coproporphyrinogen III oxidase
Medtr2g021150	1.36105	0.17191	7.91719	2.42938e-15	6.15344e-14	PF00646(F-box domain)	AT3G23880	F-box and associated interaction domains-containing protein
Medtr4g105460	1.36074	0.141423	9.62177	6.47099e-22	3.5937e-20		AT5G63060	Sec14p-like phosphatidylinositol transfer family protein
Medtr7g053110	1.36039	0.369879	3.67792	0.000235141	0.00102392		AT4G11420	eukaryotic translation initiation factor 3A
Medtr6g088375	1.35999	0.308552	4.40766	1.04493e-05	6.11702e-05	PF00083(Sugar (and other) transporter)	AT1G77210	sugar transporter 14
Medtr2g437260	1.35994	0.257213	5.28722	1.24191e-07	1.04391e-06	PF02536(mTERF)	AT5G07900	Mitochondrial transcription termination factor family protein
Medtr6g072030	1.35965	0.42583	3.19295	0.00140829	0.00505206	PF01535(PPR repeat)	AT1G12700	ATP binding;nucleic acid binding;helicases
Medtr1g066710	1.35953	0.268033	5.07226	3.93125e-07	3.03418e-06	PF00141(Peroxidase)	AT2G37130	Peroxidase superfamily protein
Medtr3g005450	1.35945	0.13929	9.75984	1.67424e-22	9.92463e-21	PF01479(S4 domain), PF00163(Ribosomal protein S4/S9 N-terminal domain)	AT5G39850	Ribosomal protein S4
Medtr7g090640	1.35789	0.108233	12.5459	4.1842e-36	7.65737e-34		AT3G57180	P-loop containing nucleoside triphosphate hydrolases superfamily protein
MT4Noble_028678	1.35775	0.509983	2.66234	0.00775993	0.0224269
Medtr4g127790	1.35755	0.15033	9.03043	1.70991e-19	7.31961e-18	PF00152(tRNA synthetases class II (D, K and N) )	AT3G11710	lysyl-tRNA synthetase 1
Medtr4g111975	1.35742	0.296749	4.57431	4.77784e-06	2.98881e-05	PF00249(Myb-like DNA-binding domain)	AT1G49010	Duplicated homeodomain-like superfamily protein
Medtr2g019630	1.35679	0.410543	3.30487	0.000950198	0.00356592	PF00953(Glycosyl transferase family 4)	AT4G18270	translocase 11
Medtr2g095060	1.35672	0.317331	4.27541	1.90788e-05	0.000105633	PF03330(Rare lipoprotein A (RlpA)-like double-psi beta-barrel)
Medtr7g107100	1.3567	0.200953	6.75135	1.4648e-11	2.2759e-10	PF04389(Peptidase family M28), PF02225(PA domain), PF04253(Transferrin receptor-like dimerisation domain)	AT3G54720	Peptidase M28 family protein
Medtr8g086560	1.35668	0.179079	7.57589	3.5668e-14	7.89445e-13	PF01535(PPR repeat)	AT4G18750	Pentatricopeptide repeat (PPR) superfamily protein
Medtr2g020160	1.35667	0.179319	7.56566	3.85893e-14	8.49276e-13	PF05368(NmrA-like family)	AT5G18660	NAD(P)-binding Rossmann-fold superfamily protein
Medtr8g469630	1.35624	0.570815	2.37598	0.0175025	0.0449437	PF00962(Adenosine/AMP deaminase)	AT2G38280	AMP deaminase, putative / myoadenylate deaminase, putative
Medtr4g126360	1.35267	0.260418	5.19421	2.05588e-07	1.66646e-06		AT1G55160
Medtr4g050140	1.35242	0.396067	3.41463	0.000638698	0.00250448	PF07859(alpha/beta hydrolase fold)	AT5G06570	alpha/beta-Hydrolases superfamily protein
Medtr4g051130	1.35236	0.459268	2.9446	0.00323369	0.0104897	PF04561(RNA polymerase Rpb2, domain 2), PF04563(RNA polymerase beta subunit), PF04560(RNA polymerase Rpb2, domain 7), PF04565(RNA polymerase Rpb2, domain 3), PF04983(RNA polymerase Rpb1, domain 3), PF04997(RNA polymerase Rpb1, domain 1), PF00562(RNA polymerase Rpb2, domain 6), PF00623(RNA polymerase Rpb1, domain 2)	ATCG00190	RNA polymerase subunit beta
Medtr8g030690	1.35226	0.122762	11.0153	3.2243e-28	3.17401e-26	PF00069(Protein kinase domain)	AT2G45910	U-box domain-containing protein kinase family protein
Medtr0103s0090	1.35136	0.235845	5.72986	1.00515e-08	1.0099e-07	PF00892(EamA-like transporter family)	AT3G28050	nodulin MtN21 /EamA-like transporter family protein
MT4Noble_005414	1.35117	0.258523	5.2265	1.7275e-07	1.41926e-06
Medtr5g044260	1.34924	0.267317	5.04735	4.47977e-07	3.43034e-06	PF01535(PPR repeat)	AT1G59720	Tetratricopeptide repeat (TPR)-like superfamily protein
Medtr5g005200	1.34707	0.0783701	17.1886	3.23233e-66	5.50869e-63	PF02201(SWIB/MDM2 domain)	AT2G14880	SWIB/MDM2 domain superfamily protein
Medtr3g052740	1.34631	0.341435	3.94308	8.04415e-05	0.00038926	PF06155(Protein of unknown function (DUF971))	AT3G27340
Medtr1g104555	1.34545	0.540957	2.48717	0.0128763	0.0347098	PF00069(Protein kinase domain), PF00954(S-locus glycoprotein domain), PF01453(D-mannose binding lectin)	AT5G60900	receptor-like protein kinase 1
Medtr3g078380	1.34358	0.446434	3.00958	0.00261613	0.00871235	PF00400(WD domain, G-beta repeat)	AT5G50120	Transducin/WD40 repeat-like superfamily protein
Medtr8g099495	1.34186	0.309544	4.33495	1.45791e-05	8.28557e-05	PF00097(Zinc finger, C3HC4 type (RING finger))	AT5G53110	RING/U-box superfamily protein
Medtr8g099065	1.34048	0.230714	5.81013	6.24241e-09	6.53177e-08	PF00004(ATPase family associated with various cellular activities (AAA))	AT1G64110	P-loop containing nucleoside triphosphate hydrolases superfamily protein
Medtr6g007887	1.3403	0.098822	13.5628	6.65522e-42	1.97255e-39		AT5G14910	Heavy metal transport/detoxification superfamily protein
Medtr1g102800	1.33998	0.393135	3.40844	0.000653358	0.00255277	PF00504(Chlorophyll A-B binding protein)	AT3G22840	Chlorophyll A-B binding family protein
Medtr1g026070	1.33971	0.344551	3.88828	0.000100958	0.000478771	PF00097(Zinc finger, C3HC4 type (RING finger))	AT5G42200	RING/U-box superfamily protein
Medtr3g015950	1.33919	0.269504	4.96908	6.72696e-07	4.99267e-06		AT4G00310	Putative membrane lipoprotein
Medtr6g048050	1.33825	0.421696	3.17348	0.00150621	0.00535621	PF05684(Protein of unknown function (DUF819))	AT5G24000	Protein of unknown function (DUF819)
Medtr5g035910	1.33793	0.258473	5.17629	2.2634e-07	1.81631e-06	PF00069(Protein kinase domain), PF00139(Legume lectin domain)	AT3G55550	Concanavalin A-like lectin protein kinase family protein
Medtr0009s0370	1.33773	0.146238	9.14765	5.81846e-20	2.64871e-18	PF00083(Sugar (and other) transporter)	AT1G11260	sugar transporter 1
Medtr8g022300	1.33762	0.236	5.66786	1.44591e-08	1.42182e-07	PF05564(Dormancy/auxin associated protein)	AT1G54070	Dormancy/auxin associated family protein
Medtr4g105140	1.33648	0.216404	6.17583	6.58158e-10	8.05143e-09		AT5G63100	S-adenosyl-L-methionine-dependent methyltransferases superfamily protein
Medtr5g057990	1.33603	0.346218	3.85892	0.000113891	0.000534156	PF01055(Glycosyl hydrolases family 31 )	AT1G68560	alpha-xylosidase 1
Medtr3g095920	1.33587	0.269111	4.96402	6.90481e-07	5.11492e-06	PF01095(Pectinesterase), PF04043(Plant invertase/pectin methylesterase inhibitor)	AT5G09760	Plant invertase/pectin methylesterase inhibitor superfamily
Medtr4g057210	1.33409	0.0886476	15.0494	3.48571e-51	2.21043e-48	PF01281(Ribosomal protein L9, N-terminal domain), PF03948(Ribosomal protein L9, C-terminal domain)	AT3G44890	ribosomal protein L9
Medtr1g052065	1.33385	0.496953	2.68406	0.00727349	0.0212121
Medtr0493s0010	1.33306	0.525876	2.53493	0.0112468	0.0309396	PF01535(PPR repeat)	AT1G74630	Tetratricopeptide repeat (TPR)-like superfamily protein
Medtr0009s0500	1.33132	0.503601	2.64361	0.00820276	0.0234975
Medtr4g011040	1.33038	0.114543	11.6147	3.47132e-31	4.44394e-29	PF01327(Polypeptide deformylase)	AT1G15390	peptide deformylase 1A
Medtr7g095340	1.32925	0.511168	2.60042	0.00931105	0.0262531	PF00646(F-box domain)	AT3G60790	F-box family protein
Medtr7g111880	1.3288	0.224499	5.91897	3.23961e-09	3.56057e-08	PF01789(PsbP)	AT4G15510	Photosystem II reaction center PsbP family protein
Medtr4g079780	1.32877	0.148872	8.9256	4.43301e-19	1.815e-17	PF01450(Acetohydroxy acid isomeroreductase, catalytic domain), PF07991(Acetohydroxy acid isomeroreductase, NADPH-binding domain)	AT3G58610	ketol-acid reductoisomerase
Medtr6g012810	1.32601	0.565619	2.34435	0.0190602	0.0482324	PF00069(Protein kinase domain), PF00954(S-locus glycoprotein domain), PF08276(PAN-like domain), PF01453(D-mannose binding lectin)	AT1G11300	protein serine/threonine kinases;protein kinases;ATP binding;sugar binding;kinases;carbohydrate binding
[truncated: 3,068 more rows]

## Sheet: 42d.21d genes
Gene ID	log2FoldChange	lfcSE	stat	pvalue	padj	Gene description	Arabidopsis hit description	Annotation
[truncated: 4,850 more rows]

## Sheet: All DE genes Log2FoldChange
Gene ID	28d.21d	35d.21d	42d.21d	AT Gene ID	Gene description
[truncated: 6,845 more rows]

[truncated: 6 more sheets: Core DE genes Log2FoldChange, 28d.21d TFs, 35d.21d TFs, 42d.21d TFs, All DE TFs Log2FoldChange, Core TFs Log2FoldChange]
