# Supplementary material for: Transcriptional Programs and Regulators Underlying Age-Dependent and Dark-Induced Senescence in Medicago truncatula
Source: Cells. 2022 May 6;11(9):1570. doi: 10.3390/cells11091570 (PMC9103780; doi:10.3390/cells11091570)
Supplement: Supplementary file 1 [file cells-11-01570-s001.zip › Supplementary Dataset S3. STEM profiles with Mapman annotations of DE genes during age-dependent senescence.xlsx]

## Sheet: Combined 0-18 profiles age
IDENTIFIER	BINCODE	NAME Mapman annotation	TYPE
Medtr2g008610	'1.1.1.1'	'PS.lightreaction.photosystem II.LHC-II'	light harvesting complex of photosystem II.; light harvesting complex photosystem II subunit 6 (LHCB6); FUNCTIONS IN: chlorophyll binding; INVOLVED IN: photosynthesis
Medtr2g081090	'1.1.1.1'	'PS.lightreaction.photosystem II.LHC-II'	thylakoid
Medtr3g070340	'1.1.1.1'	'PS.lightreaction.photosystem II.LHC-II'	light harvesting complex of photosystem II; light harvesting complex photosystem II (LHCB4.3); CONTAINS InterPro DOMAIN/s: Chlorophyll A-B binding protein (InterPro:IPR001344); BEST Arabidopsis thaliana protein match is: light harvesting complex photosystem II (TAIR:AT3G08940.2). & (q93wd2|cb29_chlre : 247.0) Chlorophyll a-b binding protein CP29 - Chlamydomonas reinhardtii & (gnl|cdd|84819 : 159.…
Medtr4g015570	'1.1.1.1'	'PS.lightreaction.photosystem II.LHC-II'	response to red light
Medtr5g097280	'1.1.1.1'	'PS.lightreaction.photosystem II.LHC-II'	chloroplast precursor (LHCII type II CAB-215) (LHCP) - Pisum sativum (Garden pea) & (at2g05100 : 437.0) Lhcb2.1 protein encoding a subunit of the light harvesting complex II. Member of a gene family with high degree of sequence similarity. Initially LHCB2.3 was considered as a separate gene but appears to be an allele of LHCB2.1.; photosystem II light harvesting complex gene 2.1 (LHCB2.1); FUNCTI…
Medtr6g011870	'1.1.1.1'	'PS.lightreaction.photosystem II.LHC-II'	chloroplast precursor (LHCII type I CAB-AB80) (LHCP) - Pisum sativum (Garden pea) & (at1g29930 : 437.0) Subunit of light-harvesting complex II (LHCII)
Medtr6g011880	'1.1.1.1'	'PS.lightreaction.photosystem II.LHC-II'	chloroplast precursor (LHCII type I CAB-40) (LHCP) - Nicotiana tabacum (Common tobacco) & (at1g29930 : 439.0) Subunit of light-harvesting complex II (LHCII)
Medtr6g012110	'1.1.1.1'	'PS.lightreaction.photosystem II.LHC-II'	chloroplast precursor (LHCII type I CAB-AB80) (LHCP) - Pisum sativum (Garden pea) & (at1g29930 : 424.0) Subunit of light-harvesting complex II (LHCII)
Medtr6g043600	'1.1.1.1'	'PS.lightreaction.photosystem II.LHC-II'	chloroplast precursor (LHCII type I CAB-40) (LHCP) - Nicotiana tabacum (Common tobacco) & (at1g29930 : 345.0) Subunit of light-harvesting complex II (LHCII)
Medtr6g060175	'1.1.1.1'	'PS.lightreaction.photosystem II.LHC-II'	response to red light
Medtr1g057280	'1.1.1.2'	'PS.lightreaction.photosystem II.PSII polypeptide subunits'	a part of the photosystem II reaction center core; photosystem II reaction center protein A (PSBA); FUNCTIONS IN: chlorophyll binding; INVOLVED IN: photosynthesis
Medtr1g086380	'1.1.1.2'	'PS.lightreaction.photosystem II.PSII polypeptide subunits'	a part of the photosystem II reaction center core; photosystem II reaction center protein A (PSBA); FUNCTIONS IN: chlorophyll binding; INVOLVED IN: photosynthesis
Medtr1g115410	'1.1.1.2'	'PS.lightreaction.photosystem II.PSII polypeptide subunits'	chloroplast thylakoid lumen
Medtr3g088450	'1.1.1.2'	'PS.lightreaction.photosystem II.PSII polypeptide subunits'	a part of the photosystem II reaction center core; photosystem II reaction center protein A (PSBA); FUNCTIONS IN: chlorophyll binding; INVOLVED IN: photosynthesis
Medtr3g449930	'1.1.1.2'	'PS.lightreaction.photosystem II.PSII polypeptide subunits'	chloroplast precursor (OEE2) (23 kDa subunit of oxygen evolving system of photosystem II) (OEC 23 kDa subunit) (23 kDa thylakoid membrane protein) - Pisum sativum (Garden pea) & (at1g06680 : 302.0) Encodes a 23 kD extrinsic protein that is part of photosystem II and participates in the regulation of oxygen evolution.; photosystem II subunit P-1 (PSBP-1); FUNCTIONS IN: poly(U) RNA binding; INVOLVE…
Medtr4g050850	'1.1.1.2'	'PS.lightreaction.photosystem II.PSII polypeptide subunits'	but the most favored at present is that it plays a protective role by acting as an electron acceptor or electron donor under conditions when electron flow through PSII is not optimized.; photosystem II reaction center protein E (PSBE); FUNCTIONS IN: electron carrier activity
Medtr4g051290	'1.1.1.2'	'PS.lightreaction.photosystem II.PSII polypeptide subunits'	a part of the photosystem II reaction center core; photosystem II reaction center protein A (PSBA); FUNCTIONS IN: chlorophyll binding; INVOLVED IN: photosynthesis
Medtr4g051370	'1.1.1.2'	'PS.lightreaction.photosystem II.PSII polypeptide subunits'	subunit of the photosystem II reaction center.; photosystem II reaction center protein B (PSBB); FUNCTIONS IN: chlorophyll binding; INVOLVED IN: photosynthesis
Medtr5g018670	'1.1.1.2'	'PS.lightreaction.photosystem II.PSII polypeptide subunits'	chloroplast precursor (OEE1) (33 kDa subunit of oxygen evolving system of photosystem II) (OEC 33 kDa subunit) (33 kDa thylakoid membrane protein) - Pisum sativum (Garden pea) & (at3g50820 : 459.0) Encodes a protein which is an extrinsic subunit of photosystem II and which has been proposed to play a central role in stabilization of the catalytic manganese cluster. In <i>Arabidopsis thaliana</i> …
Medtr7g021750	'1.1.1.2'	'PS.lightreaction.photosystem II.PSII polypeptide subunits'	a part of the photosystem II reaction center core; photosystem II reaction center protein A (PSBA); FUNCTIONS IN: chlorophyll binding; INVOLVED IN: photosynthesis
Medtr8g005175	'1.1.1.2'	'PS.lightreaction.photosystem II.PSII polypeptide subunits'	chloroplast precursor (OEE3) (16 kDa subunit of oxygen evolving system of photosystem II) (OEC 16 kDa subunit) - Spinacia oleracea (Spinach) & (ipr008797 : 158.69604) Photosystem II PsbQ
Medtr8g056790	'1.1.1.2'	'PS.lightreaction.photosystem II.PSII polypeptide subunits'	light reaction; LOCATED IN: in 7 components; EXPRESSED IN: 25 plant structures; EXPRESSED DURING: 13 growth stages; CONTAINS InterPro DOMAIN/s: Photosystem antenna protein-like (InterPro:IPR000932)
Medtr8g078870	'1.1.1.2'	'PS.lightreaction.photosystem II.PSII polypeptide subunits'	chloroplast precursor (OEE1) (33 kDa subunit of oxygen evolving system of photosystem II) (OEC 33 kDa subunit) (33 kDa thylakoid membrane protein) - Pisum sativum (Garden pea) & (at3g50820 : 475.0) Encodes a protein which is an extrinsic subunit of photosystem II and which has been proposed to play a central role in stabilization of the catalytic manganese cluster. In <i>Arabidopsis thaliana</i> …
Medtr8g023790	'1.1.2.1'	'PS.lightreaction.photosystem I.LHC-I'	chloroplast precursor (LHCI type II CAB) - Petunia hybrida (Petunia) & (at3g61470 : 400.0) Encodes a component of the light harvesting antenna complex of photosystem I.; photosystem I light harvesting complex gene 2 (LHCA2); FUNCTIONS IN: chlorophyll binding; INVOLVED IN: photosynthesis
Medtr1g026820	'1.1.2.2'	'PS.lightreaction.photosystem I.PSI polypeptide subunits'	chloroplast precursor (Photosystem I subunit X) (PSI-K) - Medicago sativa (Alfalfa) & (at1g30380 : 153.0) Encodes subunit K of photosystem I reaction center.; photosystem I subunit K (PSAK); FUNCTIONS IN: molecular_function unknown; INVOLVED IN: photosynthesis; LOCATED IN: thylakoid
Medtr2g029370	'1.1.2.2'	'PS.lightreaction.photosystem I.PSI polypeptide subunits'	subunit III (InterPro:IPR003666); Has 387 Blast hits to 387 proteins in 119 species: Archae - 0; Bacteria - 139; Metazoa - 0; Fungi - 0; Plants - 79; Viruses - 6; Other Eukaryotes - 163 (source: NCBI BLink). & (p12355|psaf_spiol : 291.0) Photosystem I reaction center subunit III
Medtr2g100210	'1.1.2.2'	'PS.lightreaction.photosystem I.PSI polypeptide subunits'	light harvesting in photosystem II
Medtr3g010000	'1.1.2.2'	'PS.lightreaction.photosystem I.PSI polypeptide subunits'	an 11-kDa membrane protein that plays an important role in electron transport between plastocyanin and PSI and is involved in the stability of the PSI complex. PSI-G subunit is bound to PSI-B and is in contact with Lhca1. The protein inserts into thylakoids by a direct or "spontaneous" pathway that does not involve the activities of any known chloroplast protein-targeting machinery. PSI-G appears…
Medtr3g035600	'1.1.2.2'	'PS.lightreaction.photosystem I.PSI polypeptide subunits'	light harvesting in photosystem II
Medtr3g095540	'1.1.2.2'	'PS.lightreaction.photosystem I.PSI polypeptide subunits'	photosystem I
Medtr4g050960	'1.1.2.2'	'PS.lightreaction.photosystem I.PSI polypeptide subunits'	4 sulfur cluster binding
Medtr4g052420	'1.1.2.2'	'PS.lightreaction.photosystem I.PSI polypeptide subunits'	photosynthesis
Medtr7g079900	'1.1.2.2'	'PS.lightreaction.photosystem I.PSI polypeptide subunits'	light reaction
Medtr7g118290	'1.1.2.2'	'PS.lightreaction.photosystem I.PSI polypeptide subunits'	and this ratio is not affected by light. Contains seven phosphorylation sites on threonine residue and chloroplast targeting signal. Located in the proximity of PSI-L
Medtr8g024180	'1.1.2.2'	'PS.lightreaction.photosystem I.PSI polypeptide subunits'	and this ratio is not affected by light. Contains seven phosphorylation sites on threonine residue and chloroplast targeting signal. Located in the proximity of PSI-L
Medtr4g069970	'1.1.30'	'PS.lightreaction.state transition'	protein kinase activity
Medtr7g078730	'1.1.30'	'PS.lightreaction.state transition'	protein kinase activity
Medtr3g105080	'1.1.5.2'	'PS.lightreaction.other electron carrier (ox/red).ferredoxin'	T
Medtr8g088720	'1.1.5.2'	'PS.lightreaction.other electron carrier (ox/red).ferredoxin'	chloroplast precursor (PFLP) - Capsicum annuum (Bell pepper) & (at1g60950 : 158.0) encodes a major leaf ferredoxin; FED A; FUNCTIONS IN: electron carrier activity
Medtr7g021720	'1.1.6'	'PS.lightreaction.NADH DH'	chloroplast (EC 1.6.5.-) (NAD(P)H dehydrogenase
Medtr5g014260	'1.2.4.4'	'PS.photorespiration.glycine cleavage.H protein'	mitochondrial precursor - Pisum sativum (Garden pea) & (at1g32470 : 164.0) Single hybrid motif superfamily protein; FUNCTIONS IN: glycine dehydrogenase (decarboxylating) activity; INVOLVED IN: glycine catabolic process
Medtr5g096670	'1.3.6'	'PS.calvin cycle.aldolase'	cytoplasmic isozyme 1 (EC 4.1.2.13) - Pisum sativum (Garden pea) & (gnl|cdd|84661 : 618.0) no description available & (gnl|cdd|36770 : 585.0) no description available & (at4g26530 : 577.0) Aldolase superfamily protein; FUNCTIONS IN: fructose-bisphosphate aldolase activity; INVOLVED IN: glycolysis
Medtr7g081220	'10.1.12.2'	'cell wall.precursor synthesis.KDO pathway.KDO-8-Phosphate Synthase'	a component of cell wall rhamnogalacturonan II.; AtkdsA1; FUNCTIONS IN: 3-deoxy-8-phosphooctulonate synthase activity; INVOLVED IN: metabolic process
Medtr5g009160	'10.1.2'	'cell wall.precursor synthesis.UGE'	protein dimerization activity; INVOLVED IN: response to stress; LOCATED IN: endomembrane system; EXPRESSED IN: male gametophyte
Medtr7g007320	'10.1.20'	'cell wall.precursor synthesis.phosphomannose isomerase'	Cupin
Medtr3g084090	'10.1.6'	'cell wall.precursor synthesis.GAE'	catalytic activity; INVOLVED IN: cellular metabolic process
Medtr8g089180	'10.1.9'	'cell wall.precursor synthesis.MUR4'	the nucleotide sugar used by glycosyltransferases in the arabinosylation of cell wall polysaccharides and wall-resident proteoglycans.; MURUS 4 (MUR4); FUNCTIONS IN: UDP-arabinose 4-epimerase activity
Medtr1g492700	'10.2'	'cell wall.cellulose synthesis'	family 2 (InterPro:IPR001173); BEST Arabidopsis thaliana protein match is: cellulose synthase-like A02 (TAIR:AT5G22740.1); Has 1807 Blast hits to 1807 proteins in 277 species: Archae - 0; Bacteria - 0; Metazoa - 736; Fungi - 347; Plants - 385; Viruses - 0; Other Eukaryotes - 339 (source: NCBI BLink). & (gnl|cdd|31408 : 130.0) no description available & (reliability: 1608.0) & (original descriptio…
Medtr2g028480	'10.2'	'cell wall.cellulose synthesis'	family 9 & (at5g49720 : 951.0) Encodes a membrane-bound endo-1
Medtr2g035780	'10.2'	'cell wall.cellulose synthesis'	plant-type cell wall biogenesis
Medtr3g103500	'10.2'	'cell wall.cellulose synthesis'	transferase activity
Medtr4g006010	'10.2'	'cell wall.cellulose synthesis'	transferase activity
Medtr4g055520	'10.2'	'cell wall.cellulose synthesis'	family 2 (InterPro:IPR001173); BEST Arabidopsis thaliana protein match is: Nucleotide-diphospho-sugar transferases superfamily protein (TAIR:AT5G03760.1); Has 5133 Blast hits to 5129 proteins in 1484 species: Archae - 200; Bacteria - 4017; Metazoa - 35; Fungi - 91; Plants - 482; Viruses - 11; Other Eukaryotes - 297 (source: NCBI BLink). & (gnl|cdd|31408 : 124.0) no description available & (reliab…
Medtr8g063270	'10.2'	'cell wall.cellulose synthesis'	plant-type cell wall biogenesis
Medtr1g073740	'10.2.1'	'cell wall.cellulose synthesis.cellulose synthase'	transferase activity
Medtr1g098550	'10.2.1'	'cell wall.cellulose synthesis.cellulose synthase'	related to CESA6.; cellulose synthase A9 (CESA9); FUNCTIONS IN: cellulose synthase activity
Medtr2g016630	'10.2.1'	'cell wall.cellulose synthesis.cellulose synthase'	reduced cellulose content
Medtr2g037830	'10.2.1'	'cell wall.cellulose synthesis.cellulose synthase'	transferase activity
Medtr3g030040	'10.2.1'	'cell wall.cellulose synthesis.cellulose synthase'	along with CESA1 and CESA6 are present in the same plasma membrane complex for cellulose biosynthesis. As inferred from the null role of secondary wall-type CesAs
Medtr3g060220	'10.2.1'	'cell wall.cellulose synthesis.cellulose synthase'	transferase activity
Medtr4g130510	'10.2.1'	'cell wall.cellulose synthesis.cellulose synthase'	plant-type cell wall biogenesis
Medtr7g109200	'10.2.1'	'cell wall.cellulose synthesis.cellulose synthase'	reduced xylan level and reduced xylan synthase activity in stems.; cellulose synthase-like D5 (CSLD5); CONTAINS InterPro DOMAIN/s: Cellulose synthase (InterPro:IPR005150); BEST Arabidopsis thaliana protein match is: cellulose synthase-like D3 (TAIR:AT3G03050.1); Has 3375 Blast hits to 3003 proteins in 709 species: Archae - 13; Bacteria - 1269; Metazoa - 102; Fungi - 19; Plants - 1879; Viruses - 2…
Medtr8g086600	'10.2.1'	'cell wall.cellulose synthesis.cellulose synthase'	reduced cellulose content
Medtr8g092590	'10.2.1'	'cell wall.cellulose synthesis.cellulose synthase'	along with CESA1 and CESA3 are present in the same plasma membrane complex for cellulose biosynthesis. CESA2 and CESA5 are related to CESA6
Medtr2g462010	'10.2.2'	'cell wall.cellulose synthesis.COBRA'	multidimensional cell growth
Medtr6g015880	'10.2.2'	'cell wall.cellulose synthesis.COBRA'	similar to phytochelatin synthetase. Involved in secondary cell wall biosynthesis. Mutants make smaller plants with reduced levels of cellulose and cell wall sugars.; IRREGULAR XYLEM 6 (IRX6); INVOLVED IN: secondary cell wall biogenesis; LOCATED IN: plasma membrane
Medtr7g015950	'10.2.2'	'cell wall.cellulose synthesis.COBRA'	multidimensional cell growth
Medtr7g015960	'10.2.2'	'cell wall.cellulose synthesis.COBRA'	similar to phytochelatin synthetase. Involved in secondary cell wall biosynthesis. Mutants make smaller plants with reduced levels of cellulose and cell wall sugars.; IRREGULAR XYLEM 6 (IRX6); INVOLVED IN: secondary cell wall biogenesis; LOCATED IN: plasma membrane
Medtr4g107360	'10.3'	'cell wall.hemicellulose synthesis'	transferring hexosyl groups
Medtr5g037300	'10.3'	'cell wall.hemicellulose synthesis'	transferring hexosyl groups
Medtr1g019540	'10.3.2'	'cell wall.hemicellulose synthesis.glucuronoxylan'	transferring glycosyl groups; INVOLVED IN: biosynthetic process; LOCATED IN: endomembrane system; EXPRESSED IN: inflorescence meristem
Medtr1g021855	'10.3.2'	'cell wall.hemicellulose synthesis.glucuronoxylan'	transferring hexosyl groups
Medtr3g111600	'10.3.2'	'cell wall.hemicellulose synthesis.glucuronoxylan'	transferring hexosyl groups
Medtr5g019220	'10.3.2'	'cell wall.hemicellulose synthesis.glucuronoxylan'	transferring hexosyl groups
Medtr2g017950	'10.5.1.1'	'cell wall.cell wall proteins.AGPs.AGP'	anchored to membrane; EXPRESSED IN: 22 plant structures; EXPRESSED DURING: 13 growth stages; CONTAINS InterPro DOMAIN/s: FAS1 domain (InterPro:IPR000782); BEST Arabidopsis thaliana protein match is: FASCICLIN-like arabinogalactan-protein 11 (TAIR:AT5G03170.1); Has 1807 Blast hits to 1807 proteins in 277 species: Archae - 0; Bacteria - 0; Metazoa - 736; Fungi - 347; Plants - 385; Viruses - 0; Othe…
Medtr2g017960	'10.5.1.1'	'cell wall.cell wall proteins.AGPs.AGP'	anchored to membrane; EXPRESSED IN: 22 plant structures; EXPRESSED DURING: 13 growth stages; CONTAINS InterPro DOMAIN/s: FAS1 domain (InterPro:IPR000782); BEST Arabidopsis thaliana protein match is: FASCICLIN-like arabinogalactan-protein 11 (TAIR:AT5G03170.1); Has 1807 Blast hits to 1807 proteins in 277 species: Archae - 0; Bacteria - 0; Metazoa - 736; Fungi - 347; Plants - 385; Viruses - 0; Othe…
Medtr2g017970	'10.5.1.1'	'cell wall.cell wall proteins.AGPs.AGP'	anchored to membrane; EXPRESSED IN: 22 plant structures; EXPRESSED DURING: 13 growth stages; CONTAINS InterPro DOMAIN/s: FAS1 domain (InterPro:IPR000782); BEST Arabidopsis thaliana protein match is: FASCICLIN-like arabinogalactan-protein 11 (TAIR:AT5G03170.1); Has 1807 Blast hits to 1807 proteins in 277 species: Archae - 0; Bacteria - 0; Metazoa - 736; Fungi - 347; Plants - 385; Viruses - 0; Othe…
Medtr2g093970	'10.5.1.1'	'cell wall.cell wall proteins.AGPs.AGP'	anchored to membrane; EXPRESSED IN: 22 plant structures; EXPRESSED DURING: 13 growth stages; CONTAINS InterPro DOMAIN/s: FAS1 domain (InterPro:IPR000782); BEST Arabidopsis thaliana protein match is: FASCICLIN-like arabinogalactan-protein 11 (TAIR:AT5G03170.1); Has 1807 Blast hits to 1807 proteins in 277 species: Archae - 0; Bacteria - 0; Metazoa - 736; Fungi - 347; Plants - 385; Viruses - 0; Othe…
Medtr2g093980	'10.5.1.1'	'cell wall.cell wall proteins.AGPs.AGP'	T
Medtr2g093990	'10.5.1.1'	'cell wall.cell wall proteins.AGPs.AGP'	anchored to membrane; EXPRESSED IN: 22 plant structures; EXPRESSED DURING: 13 growth stages; CONTAINS InterPro DOMAIN/s: FAS1 domain (InterPro:IPR000782); BEST Arabidopsis thaliana protein match is: FASCICLIN-like arabinogalactan-protein 11 (TAIR:AT5G03170.1); Has 1807 Blast hits to 1807 proteins in 277 species: Archae - 0; Bacteria - 0; Metazoa - 736; Fungi - 347; Plants - 385; Viruses - 0; Othe…
Medtr2g437700	'10.5.1.1'	'cell wall.cell wall proteins.AGPs.AGP'	abnormal siliques and root growth is inhibited under salt stress. The gene has similarity to arabinogalactan proteins and domains associated with cell adhesion.; salt overly sensitive 5 (SOS5); FUNCTIONS IN: polysaccharide binding; INVOLVED IN: multidimensional cell growth
Medtr4g050170	'10.5.1.1'	'cell wall.cell wall proteins.AGPs.AGP'	T
Medtr4g059720	'10.5.1.1'	'cell wall.cell wall proteins.AGPs.AGP'	anchored to membrane; EXPRESSED IN: 22 plant structures; EXPRESSED DURING: 13 growth stages; CONTAINS InterPro DOMAIN/s: FAS1 domain (InterPro:IPR000782); BEST Arabidopsis thaliana protein match is: FASCICLIN-like arabinogalactan-protein 11 (TAIR:AT5G03170.1); Has 1807 Blast hits to 1807 proteins in 277 species: Archae - 0; Bacteria - 0; Metazoa - 736; Fungi - 347; Plants - 385; Viruses - 0; Othe…
Medtr4g059780	'10.5.1.1'	'cell wall.cell wall proteins.AGPs.AGP'	anchored to membrane; EXPRESSED IN: 22 plant structures; EXPRESSED DURING: 13 growth stages; CONTAINS InterPro DOMAIN/s: FAS1 domain (InterPro:IPR000782); BEST Arabidopsis thaliana protein match is: FASCICLIN-like arabinogalactan-protein 11 (TAIR:AT5G03170.1); Has 1807 Blast hits to 1807 proteins in 277 species: Archae - 0; Bacteria - 0; Metazoa - 736; Fungi - 347; Plants - 385; Viruses - 0; Othe…
Medtr4g059790	'10.5.1.1'	'cell wall.cell wall proteins.AGPs.AGP'	anchored to membrane; EXPRESSED IN: 22 plant structures; EXPRESSED DURING: 13 growth stages; CONTAINS InterPro DOMAIN/s: FAS1 domain (InterPro:IPR000782); BEST Arabidopsis thaliana protein match is: FASCICLIN-like arabinogalactan-protein 11 (TAIR:AT5G03170.1); Has 1807 Blast hits to 1807 proteins in 277 species: Archae - 0; Bacteria - 0; Metazoa - 736; Fungi - 347; Plants - 385; Viruses - 0; Othe…
Medtr5g098060	'10.5.1.1'	'cell wall.cell wall proteins.AGPs.AGP'	plasma membrane
Medtr7g075453	'10.5.1.1'	'cell wall.cell wall proteins.AGPs.AGP'	plasma membrane
Medtr7g101080	'10.5.1.1'	'cell wall.cell wall proteins.AGPs.AGP'	T
Medtr7g106760	'10.5.1.1'	'cell wall.cell wall proteins.AGPs.AGP'	T
Medtr8g087450	'10.5.1.1'	'cell wall.cell wall proteins.AGPs.AGP'	anchored to membrane; EXPRESSED IN: 22 plant structures; EXPRESSED DURING: 13 growth stages; CONTAINS InterPro DOMAIN/s: FAS1 domain (InterPro:IPR000782); BEST Arabidopsis thaliana protein match is: FASCICLIN-like arabinogalactan-protein 11 (TAIR:AT5G03170.1); Has 1807 Blast hits to 1807 proteins in 277 species: Archae - 0; Bacteria - 0; Metazoa - 736; Fungi - 347; Plants - 385; Viruses - 0; Othe…
Medtr8g087460	'10.5.1.1'	'cell wall.cell wall proteins.AGPs.AGP'	anchored to membrane; EXPRESSED IN: 22 plant structures; EXPRESSED DURING: 13 growth stages; CONTAINS InterPro DOMAIN/s: FAS1 domain (InterPro:IPR000782); BEST Arabidopsis thaliana protein match is: FASCICLIN-like arabinogalactan-protein 11 (TAIR:AT5G03170.1); Has 1807 Blast hits to 1807 proteins in 277 species: Archae - 0; Bacteria - 0; Metazoa - 736; Fungi - 347; Plants - 385; Viruses - 0; Othe…
Medtr8g087470	'10.5.1.1'	'cell wall.cell wall proteins.AGPs.AGP'	anchored to membrane; EXPRESSED IN: 22 plant structures; EXPRESSED DURING: 13 growth stages; CONTAINS InterPro DOMAIN/s: FAS1 domain (InterPro:IPR000782); BEST Arabidopsis thaliana protein match is: FASCICLIN-like arabinogalactan-protein 11 (TAIR:AT5G03170.1); Has 1807 Blast hits to 1807 proteins in 277 species: Archae - 0; Bacteria - 0; Metazoa - 736; Fungi - 347; Plants - 385; Viruses - 0; Othe…
Medtr4g075333	'10.5.2'	'cell wall.cell wall proteins.proline rich proteins'	T
Medtr6g086115	'10.5.3'	'cell wall.cell wall proteins.LRR'	plant-type cell wall; EXPRESSED IN: 22 plant structures; EXPRESSED DURING: 13 growth stages; CONTAINS InterPro DOMAIN/s: Leucine-rich repeat-containing N-terminal domain
Medtr7g015970	'10.5.5'	'cell wall.cell wall proteins.RGP'	transferring hexosyl groups
Medtr7g104250	'10.6'	'cell wall.degradation'	T
Medtr3g079750	'10.6.1'	'cell wall.degradation.cellulases and beta -1	'(at5g20950 : 938.0) Glycosyl hydrolase family protein; FUNCTIONS IN: hydrolase activity
Medtr3g113720	'10.6.1'	'cell wall.degradation.cellulases and beta -1	'(at1g19940 : 687.0) glycosyl hydrolase 9B5 (GH9B5); FUNCTIONS IN: hydrolase activity
Medtr5g085730	'10.6.1'	'cell wall.degradation.cellulases and beta -1	'(at2g32990 : 769.0) glycosyl hydrolase 9B8 (GH9B8); FUNCTIONS IN: hydrolase activity
Medtr6g028090	'10.6.1'	'cell wall.degradation.cellulases and beta -1	'(at5g20950 : 885.0) Glycosyl hydrolase family protein; FUNCTIONS IN: hydrolase activity
Medtr6g028110	'10.6.1'	'cell wall.degradation.cellulases and beta -1	'(at5g20950 : 883.0) Glycosyl hydrolase family protein; FUNCTIONS IN: hydrolase activity
Medtr7g051650	'10.6.1'	'cell wall.degradation.cellulases and beta -1	'(gnl|cdd|35845 : 512.0) no description available & (gnl|cdd|84629 : 420.0) no description available & (at2g44450 : 339.0) beta glucosidase 15 (BGLU15); FUNCTIONS IN: cation binding
Medtr7g086030	'10.6.1'	'cell wall.degradation.cellulases and beta -1	'(at5g20950 : 840.0) Glycosyl hydrolase family protein; FUNCTIONS IN: hydrolase activity
Medtr1g018200	'10.6.2'	'cell wall.degradation.mannan-xylose-arabinose-fucose'	beta-galactosidase activity
Medtr1g087240	'10.6.2'	'cell wall.degradation.mannan-xylose-arabinose-fucose'	hydrolyzing O-glycosyl compounds; INVOLVED IN: carbohydrate metabolic process; LOCATED IN: plant-type cell wall; EXPRESSED IN: 23 plant structures; EXPRESSED DURING: 13 growth stages; CONTAINS InterPro DOMAIN/s: Glycoside hydrolase
Medtr1g102230	'10.6.2'	'cell wall.degradation.mannan-xylose-arabinose-fucose'	at least when heterologously expressed in <i>Pichia pastoris</i>. The enzyme has been postulated to act on fucosylated substrates other than xyloglucan oligosaccharides. was shown (<i>Pichia pastoris</i>) to hydrolyze fucose in 3- and 4-linkage
Medtr2g008240	'10.6.2'	'cell wall.degradation.mannan-xylose-arabinose-fucose'	4-beta-xylosidase activity
Medtr3g074060	'10.6.2'	'cell wall.degradation.mannan-xylose-arabinose-fucose'	hydrolyzing O-glycosyl compounds; INVOLVED IN: carbohydrate metabolic process; LOCATED IN: apoplast
Medtr4g128570	'10.6.2'	'cell wall.degradation.mannan-xylose-arabinose-fucose'	acting on glycosyl bonds
Medtr5g062430	'10.6.2'	'cell wall.degradation.mannan-xylose-arabinose-fucose'	hydrolyzing O-glycosyl compounds; INVOLVED IN: carbohydrate metabolic process; LOCATED IN: apoplast
Medtr7g073320	'10.6.2'	'cell wall.degradation.mannan-xylose-arabinose-fucose'	hydrolase activity
Medtr7g073550	'10.6.2'	'cell wall.degradation.mannan-xylose-arabinose-fucose'	hydrolase activity
Medtr7g073620	'10.6.2'	'cell wall.degradation.mannan-xylose-arabinose-fucose'	hydrolase activity
Medtr7g109390	'10.6.2'	'cell wall.degradation.mannan-xylose-arabinose-fucose'	hydrolyzing O-glycosyl compounds; INVOLVED IN: carbohydrate metabolic process; LOCATED IN: plant-type cell wall; EXPRESSED IN: 23 plant structures; EXPRESSED DURING: 13 growth stages; CONTAINS InterPro DOMAIN/s: Glycoside hydrolase
Medtr8g005270	'10.6.2'	'cell wall.degradation.mannan-xylose-arabinose-fucose'	hydrolase activity
Medtr8g005670	'10.6.2'	'cell wall.degradation.mannan-xylose-arabinose-fucose'	hydrolase activity
Medtr8g006550	'10.6.2'	'cell wall.degradation.mannan-xylose-arabinose-fucose'	hydrolase activity
Medtr1g047370	'10.6.3'	'cell wall.degradation.pectate lyases and polygalacturonases'	pectate lyase activity; INVOLVED IN: biological_process unknown; LOCATED IN: endomembrane system; EXPRESSED IN: 20 plant structures; EXPRESSED DURING: 6 growth stages; CONTAINS InterPro DOMAIN/s: Pectin lyase fold/virulence factor (InterPro:IPR011050)
Medtr1g111590	'10.6.3'	'cell wall.degradation.pectate lyases and polygalacturonases'	AmbAllergen (InterPro:IPR018082)
Medtr2g435340	'10.6.3'	'cell wall.degradation.pectate lyases and polygalacturonases'	plant-type cell wall; EXPRESSED IN: 23 plant structures; EXPRESSED DURING: 13 growth stages; CONTAINS InterPro DOMAIN/s: Pectin lyase fold/virulence factor (InterPro:IPR011050)
Medtr3g086310	'10.6.3'	'cell wall.degradation.pectate lyases and polygalacturonases'	AmbAllergen (InterPro:IPR018082)
Medtr3g111410	'10.6.3'	'cell wall.degradation.pectate lyases and polygalacturonases'	Carbohydrate-binding-like fold (InterPro:IPR013784)
Medtr3g437820	'10.6.3'	'cell wall.degradation.pectate lyases and polygalacturonases'	defense response; LOCATED IN: cell wall
Medtr4g104320	'10.6.3'	'cell wall.degradation.pectate lyases and polygalacturonases'	AmbAllergen (InterPro:IPR018082)
Medtr5g034320	'10.6.3'	'cell wall.degradation.pectate lyases and polygalacturonases'	T
Medtr7g023590	'10.6.3'	'cell wall.degradation.pectate lyases and polygalacturonases'	defense response; LOCATED IN: cell wall
Medtr7g091850	'10.6.3'	'cell wall.degradation.pectate lyases and polygalacturonases'	the outer walls of the four meiotic products of the pollen mother cell are fused
Medtr7g110710	'10.6.3'	'cell wall.degradation.pectate lyases and polygalacturonases'	carbohydrate metabolic process; LOCATED IN: vacuole; EXPRESSED IN: 25 plant structures; EXPRESSED DURING: 15 growth stages; CONTAINS InterPro DOMAIN/s: Pectin lyase fold/virulence factor (InterPro:IPR011050)
Medtr8g064530	'10.6.3'	'cell wall.degradation.pectate lyases and polygalacturonases'	T
Medtr8g064560	'10.6.3'	'cell wall.degradation.pectate lyases and polygalacturonases'	T
Medtr8g065030	'10.6.3'	'cell wall.degradation.pectate lyases and polygalacturonases'	Pectin lyase fold (InterPro:IPR012334)
Medtr8g068120	'10.6.3'	'cell wall.degradation.pectate lyases and polygalacturonases'	Carbohydrate-binding-like fold (InterPro:IPR013784)
Medtr8g098840	'10.6.3'	'cell wall.degradation.pectate lyases and polygalacturonases'	Glycoside hydrolase
Medtr0122s0020	'10.7'	'cell wall.modification'	2004. Plant Mol Bio). Involved in the formation of nematode-induced syncytia in roots of Arabidopsis thaliana.; expansin B3 (EXPB3); INVOLVED IN: response to cyclopentenone
Medtr2g090265	'10.7'	'cell wall.modification'	2004. Plant Mol Bio). Involved in the formation of nematode-induced syncytia in roots of Arabidopsis thaliana.; expansin B3 (EXPB3); INVOLVED IN: response to cyclopentenone
Medtr2g090270	'10.7'	'cell wall.modification'	2004. Plant Mol Bio). Involved in the formation of nematode-induced syncytia in roots of Arabidopsis thaliana.; expansin B3 (EXPB3); INVOLVED IN: response to cyclopentenone
Medtr2g095800	'10.7'	'cell wall.modification'	acting on glycosyl bonds
Medtr3g084620	'10.7'	'cell wall.modification'	acting on glycosyl bonds
Medtr3g084630	'10.7'	'cell wall.modification'	acting on glycosyl bonds
Medtr3g466760	'10.7'	'cell wall.modification'	2004. Plant Mol Bio). Involved in the formation of nematode-induced syncytia in roots of Arabidopsis thaliana.; expansin A8 (EXPA8); INVOLVED IN: plant-type cell wall modification involved in multidimensional cell growth
Medtr4g063975	'10.7'	'cell wall.modification'	2004. Plant Mol Bio). Involved in the formation of nematode-induced syncytia in roots of Arabidopsis thaliana.; expansin A4 (EXPA4); CONTAINS InterPro DOMAIN/s: Barwin-related endoglucanase (InterPro:IPR009009)
Medtr4g075790	'10.7'	'cell wall.modification'	2004. Plant Mol Bio); expansin-like A1 (EXLA1); INVOLVED IN: unidimensional cell growth
Medtr4g097640	'10.7'	'cell wall.modification'	acting on glycosyl bonds
Medtr4g097670	'10.7'	'cell wall.modification'	acting on glycosyl bonds
Medtr4g097700	'10.7'	'cell wall.modification'	acting on glycosyl bonds
Medtr6g012520	'10.7'	'cell wall.modification'	2004. Plant Mol Bio); expansin A5 (EXPA5); INVOLVED IN: plant-type cell wall modification involved in multidimensional cell growth
Medtr7g084760	'10.7'	'cell wall.modification'	endoxyloglucan transferase
Medtr7g084770	'10.7'	'cell wall.modification'	endoxyloglucan transferase
Medtr0618s0020	'10.8.1'	'cell wall.pectin*esterases.PME'	pectinesterase activity; INVOLVED IN: cell wall modification; LOCATED IN: membrane
Medtr1g008140	'10.8.1'	'cell wall.pectin*esterases.PME'	active site (InterPro:IPR018040)
Medtr1g026410	'10.8.1'	'cell wall.pectin*esterases.PME'	copper ion binding; INVOLVED IN: oxidation reduction; LOCATED IN: apoplast
Medtr2g044880	'10.8.1'	'cell wall.pectin*esterases.PME'	pectinesterase activity; INVOLVED IN: cell wall modification; LOCATED IN: endomembrane system
Medtr2g088080	'10.8.1'	'cell wall.pectin*esterases.PME'	copper ion binding; INVOLVED IN: oxidation reduction; LOCATED IN: apoplast
Medtr3g010770	'10.8.1'	'cell wall.pectin*esterases.PME'	pectinesterase activity; INVOLVED IN: cell wall modification; LOCATED IN: endomembrane system
Medtr3g091380	'10.8.1'	'cell wall.pectin*esterases.PME'	pectinesterase activity; INVOLVED IN: cell wall modification; LOCATED IN: cell wall
Medtr4g049390	'10.8.1'	'cell wall.pectin*esterases.PME'	copper ion binding; INVOLVED IN: oxidation reduction; LOCATED IN: apoplast
Medtr4g075690	'10.8.1'	'cell wall.pectin*esterases.PME'	copper ion binding; INVOLVED IN: oxidation reduction; LOCATED IN: apoplast
Medtr4g087970	'10.8.1'	'cell wall.pectin*esterases.PME'	pectinesterase activity; INVOLVED IN: cell wall modification; LOCATED IN: plant-type cell wall; EXPRESSED IN: 21 plant structures; EXPRESSED DURING: 10 growth stages; CONTAINS InterPro DOMAIN/s: Pectinesterase
Medtr5g018290	'10.8.1'	'cell wall.pectin*esterases.PME'	copper ion binding; INVOLVED IN: response to karrikin; LOCATED IN: cell wall
Medtr7g050950	'10.8.1'	'cell wall.pectin*esterases.PME'	pectinesterase activity; INVOLVED IN: cell wall modification; LOCATED IN: cell wall
Medtr7g092780	'10.8.1'	'cell wall.pectin*esterases.PME'	cell wall
Medtr7g108905	'10.8.1'	'cell wall.pectin*esterases.PME'	pectinesterase activity; INVOLVED IN: cell wall modification; LOCATED IN: endomembrane system
Medtr7g112580	'10.8.1'	'cell wall.pectin*esterases.PME'	pectinesterase activity; INVOLVED IN: cell wall modification; LOCATED IN: endomembrane system
Medtr8g023150	'10.8.1'	'cell wall.pectin*esterases.PME'	plasma membrane
Medtr8g023310	'10.8.1'	'cell wall.pectin*esterases.PME'	targeted by a cellulose binding protein (CBP) from the parasitic nematode Heterodera schachtii during parasitism.; pectin methylesterase 3 (PME3); FUNCTIONS IN: pectinesterase activity; INVOLVED IN: response to nematode; LOCATED IN: cell wall
Medtr8g093460	'10.8.1'	'cell wall.pectin*esterases.PME'	pectinesterase activity; INVOLVED IN: cell wall modification; LOCATED IN: cell wall
Medtr8g104580	'10.8.1'	'cell wall.pectin*esterases.PME'	pectinesterase activity; INVOLVED IN: cell wall modification; LOCATED IN: endomembrane system
Medtr8g104645	'10.8.1'	'cell wall.pectin*esterases.PME'	pectinesterase activity; INVOLVED IN: cell wall modification; LOCATED IN: endomembrane system
Medtr8g104655	'10.8.1'	'cell wall.pectin*esterases.PME'	pectinesterase activity; INVOLVED IN: cell wall modification; LOCATED IN: endomembrane system
Medtr4g124320	'10.8.2'	'cell wall.pectin*esterases.acetyl esterase'	T
Medtr7g110900	'10.8.2'	'cell wall.pectin*esterases.acetyl esterase'	T
Medtr8g072000	'10.8.2'	'cell wall.pectin*esterases.acetyl esterase'	T
Medtr5g083520	'11.1.1'	'lipid metabolism.FA synthesis and FA elongation.Acetyl CoA Carboxylation'	Biotin/lipoyl attachment (InterPro:IPR000089)
Medtr3g073860	'11.1.1.1'	'lipid metabolism.FA synthesis and FA elongation.Acetyl CoA Carboxylation.homomeric Enzyme'	N-terminal (InterPro:IPR011762)
Medtr2g054940	'11.1.10'	'lipid metabolism.FA synthesis and FA elongation.beta ketoacyl CoA synthase'	a member of the 3-ketoacyl-CoA synthase family involved in the biosynthesis of VLCFA (very long chain fatty acids).; 3-ketoacyl-CoA synthase 11 (KCS11); FUNCTIONS IN: transferase activity
Medtr4g062170	'11.1.10'	'lipid metabolism.FA synthesis and FA elongation.beta ketoacyl CoA synthase'	a member of the 3-ketoacyl-CoA synthase family involved in the biosynthesis of VLCFA (very long chain fatty acids).; 3-ketoacyl-CoA synthase 3 (KCS3); FUNCTIONS IN: transferase activity
Medtr4g062270	'11.1.10'	'lipid metabolism.FA synthesis and FA elongation.beta ketoacyl CoA synthase'	a member of the 3-ketoacyl-CoA synthase family involved in the biosynthesis of VLCFA (very long chain fatty acids).; 3-ketoacyl-CoA synthase 12 (KCS12); FUNCTIONS IN: transferase activity
Medtr7g118170	'11.1.10'	'lipid metabolism.FA synthesis and FA elongation.beta ketoacyl CoA synthase'	acyltransferase activity; INVOLVED IN: in 7 processes; LOCATED IN: cytosolic ribosome
Medtr2g036780	'11.1.11'	'lipid metabolism.FA synthesis and FA elongation.fatty acid elongase'	transferring acyl groups other than amino-acyl groups
Medtr5g023730	'11.1.8'	'lipid metabolism.FA synthesis and FA elongation.acyl coa ligase'	conserved site (InterPro:IPR020845)
Medtr8g083170	'11.1.8'	'lipid metabolism.FA synthesis and FA elongation.acyl coa ligase'	AMP-binding
Medtr8g086050	'11.1.8'	'lipid metabolism.FA synthesis and FA elongation.acyl coa ligase'	ligase activity; INVOLVED IN: metabolic process
Medtr1g034360	'11.1.9'	'lipid metabolism.FA synthesis and FA elongation.long chain fatty acid CoA ligase'	conserved site (InterPro:IPR020845)
Medtr4g068670	'11.1.9'	'lipid metabolism.FA synthesis and FA elongation.long chain fatty acid CoA ligase'	conserved site (InterPro:IPR020845)
Medtr7g109830	'11.1.9'	'lipid metabolism.FA synthesis and FA elongation.long chain fatty acid CoA ligase'	involved in cuticular wax and cutin biosynthesis; LONG-CHAIN ACYL-COA SYNTHASE 1 (LACS1); FUNCTIONS IN: long-chain fatty acid-CoA ligase activity
Medtr8g099420	'11.1.9'	'lipid metabolism.FA synthesis and FA elongation.long chain fatty acid CoA ligase'	conserved site (InterPro:IPR020845)
Medtr7g068780	'11.2.3'	'lipid metabolism.FA desaturation.omega 3 desaturase'	chloroplast precursor (EC 1.14.19.-) - Glycine max (Soybean) & (at5g05580 : 624.0) Encodes a temperature sensitive plastidic fatty acid desaturase.; fatty acid desaturase 8 (FAD8); CONTAINS InterPro DOMAIN/s: Protein of unknown function DUF3474 (InterPro:IPR021863)
Medtr1g040500	'11.3'	'lipid metabolism.Phospholipid synthesis'	T
Medtr4g415290	'11.3'	'lipid metabolism.Phospholipid synthesis'	T
Medtr7g067380	'11.3'	'lipid metabolism.Phospholipid synthesis'	T
Medtr8g030620	'11.3'	'lipid metabolism.Phospholipid synthesis'	acyltransferase activity; INVOLVED IN: metabolic process
Medtr2g097980	'11.3.1'	'lipid metabolism.Phospholipid synthesis.1-acylglycerol-3-phosphate O-acyltransferase'	PUTATIVE SIMILAR TO ACYL-COA:1-ACYLGLYCEROL-3-PHOSPHATE ACYLTRANSFERASE GI:4583544 FROM [BRASSICA NAPUS]; lysophosphatidyl acyltransferase 3 (LPAT3); FUNCTIONS IN: 1-acylglycerol-3-phosphate O-acyltransferase activity; INVOLVED IN: metabolic process; LOCATED IN: endomembrane system; EXPRESSED IN: 9 plant structures; EXPRESSED DURING: L mature pollen stage
Medtr1g097850	'11.3.2'	'lipid metabolism.Phospholipid synthesis.choline kinase'	response to wounding; LOCATED IN: cellular_component unknown; EXPRESSED IN: 24 plant structures; EXPRESSED DURING: 15 growth stages; CONTAINS InterPro DOMAIN/s: Choline kinase
Medtr8g094940	'11.3.5'	'lipid metabolism.Phospholipid synthesis.diacylglycerol kinase'	phorbol ester/diacylglycerol binding (InterPro:IPR002219)
Medtr7g090970	'11.5.2'	'lipid metabolism.glyceral metabolism.Glycerol-3-phosphate dehydrogenase (NAD+)'	auxotrophic for glycerol/G3P due to a loss-of-function mutation in the gpsA gene.; GPDHC1; CONTAINS InterPro DOMAIN/s: 6-phosphogluconate dehydrogenase
Medtr1g094185	'11.5.3'	'lipid metabolism.glyceral metabolism.FAD-dependent glycerol-3-phosphate dehydrogenase'	and in glycerol-3-phosphate shuttle which transports reducing power from cytosol to mitochondrion.; SUGAR-DEPENDENT 6 (SDP6); FUNCTIONS IN: glycerol-3-phosphate dehydrogenase activity; INVOLVED IN: glycerophosphate shuttle
Medtr3g085210	'11.6'	'lipid metabolism.lipid transfer proteins etc'	a lipid transfer protein with a predicted GPI (glycosylphosphatidylinositol)-anchor domain. Localized in the plasma membrane. Disruption of the LTPG1 gene causes alterations of cuticular lipid composition
Medtr4g027800	'11.6'	'lipid metabolism.lipid transfer proteins etc'	basic
Medtr4g027840	'11.6'	'lipid metabolism.lipid transfer proteins etc'	basic
Medtr4g428370	'11.6'	'lipid metabolism.lipid transfer proteins etc'	At2g38530/LTP2
Medtr7g014880	'11.6'	'lipid metabolism.lipid transfer proteins etc'	anchored to membrane; EXPRESSED IN: 21 plant structures; EXPRESSED DURING: 13 growth stages; CONTAINS InterPro DOMAIN/s: Bifunctional inhibitor/plant lipid transfer protein/seed storage (InterPro:IPR016140)
Medtr2g011080	'11.8'	'lipid metabolism.'exotics'(steroids	'(at4g27270 : 211.0) Quinone reductase family protein; FUNCTIONS IN: oxidoreductase activity
Medtr3g013500	'11.8'	'lipid metabolism.'exotics'(steroids	'(at5g07010 : 410.0) Encodes a sulfotransferase that acts specifically on 11- and 12-hydroxyjasmonic acid. Transcript levels for this enzyme are increased by treatments with jasmonic acid (JA)
Medtr4g069250	'11.8'	'lipid metabolism.'exotics'(steroids	'(at4g36750 : 278.0) Quinone reductase family protein; FUNCTIONS IN: oxidoreductase activity
Medtr7g007680	'11.8'	'lipid metabolism.'exotics'(steroids	'(at5g07010 : 327.0) Encodes a sulfotransferase that acts specifically on 11- and 12-hydroxyjasmonic acid. Transcript levels for this enzyme are increased by treatments with jasmonic acid (JA)
Medtr1g016070	'11.8.1'	'lipid metabolism.'exotics' (steroids	'(at2g46210 : 613.0) Fatty acid/sphingolipid desaturase; FUNCTIONS IN: oxidoreductase activity
Medtr2g013070	'11.8.1'	'lipid metabolism.'exotics' (steroids	'(at4g04930 : 527.0) Encodes a sphingolipid delta4-desaturase
Medtr7g113780	'11.8.1'	'lipid metabolism.'exotics' (steroids	'(at3g06470 : 242.0) GNS1/SUR4 membrane protein family; FUNCTIONS IN: molecular_function unknown; INVOLVED IN: biological_process unknown; LOCATED IN: integral to membrane; EXPRESSED IN: 22 plant structures; EXPRESSED DURING: 13 growth stages; CONTAINS InterPro DOMAIN/s: GNS1/SUR4 membrane protein (InterPro:IPR002076); BEST Arabidopsis thaliana protein match is: GNS1/SUR4 membrane protein family …
Medtr4g068110	'11.8.4'	'lipid metabolism.'exotics' (steroids	'(at2g43420 : 496.0) 3-beta hydroxysteroid dehydrogenase/isomerase family protein; FUNCTIONS IN: binding
Medtr6g093180	'11.8.6'	'lipid metabolism.'exotics' (steroids	'(gnl|cdd|35718 : 1146.0) no description available & (at2g07050 : 1010.0) Involved in the biosynthesis of brassinosteroids. Catalyzes the reaction from epoxysqualene to cycloartenol.; cycloartenol synthase 1 (CAS1); FUNCTIONS IN: cycloartenol synthase activity; INVOLVED IN: pentacyclic triterpenoid biosynthetic process
Medtr8g103850	'11.9.2'	'lipid metabolism.lipid degradation.lipases'	T
Medtr1g019270	'11.9.2.1'	'lipid metabolism.lipid degradation.lipases.triacylglycerol lipase'	class 3 (InterPro:IPR002921); BEST Arabidopsis thaliana protein match is: alpha/beta-Hydrolases superfamily protein (TAIR:AT1G56630.1); Has 1515 Blast hits to 1509 proteins in 328 species: Archae - 0; Bacteria - 466; Metazoa - 48; Fungi - 299; Plants - 385; Viruses - 5; Other Eukaryotes - 312 (source: NCBI BLink). & (gnl|cdd|73213 : 135.0) no description available & (gnl|cdd|39769 : 130.0) no des…
Medtr1g110670	'11.9.3'	'lipid metabolism.lipid degradation.lysophospholipases'	T
Medtr2g100250	'11.9.3.1'	'lipid metabolism.lipid degradation.lysophospholipases.phospholipase D'	hence it is a member of the alpha class. Its amino acid sequence is quite different from other PLDs
Medtr3g107360	'11.9.3.1'	'lipid metabolism.lipid degradation.lysophospholipases.phospholipase D'	phosphatidylinositol-4
Medtr5g011050	'11.9.3.1'	'lipid metabolism.lipid degradation.lysophospholipases.phospholipase D'	protein binding
Medtr7g075910	'11.9.3.1'	'lipid metabolism.lipid degradation.lysophospholipases.phospholipase D'	protein binding
Medtr8g016160	'11.9.3.1'	'lipid metabolism.lipid degradation.lysophospholipases.phospholipase D'	hence it is a member of the alpha class. Its amino acid sequence is quite different from other PLDs
Medtr1g105020	'11.9.3.2'	'lipid metabolism.lipid degradation.lysophospholipases.carboxylesterase'	hypocotyl
Medtr3g012440	'11.9.3.2'	'lipid metabolism.lipid degradation.lysophospholipases.carboxylesterase'	petal differentiation and expansion stage; CONTAINS InterPro DOMAIN/s: Lipase
Medtr1g027830	'11.9.3.3'	'lipid metabolism.lipid degradation.lysophospholipases.glycerophosphodiester phosphodiesterase'	ATP binding site (InterPro:IPR017441)
Medtr4g109600	'11.9.3.3'	'lipid metabolism.lipid degradation.lysophospholipases.glycerophosphodiester phosphodiesterase'	glycerophosphodiester phosphodiesterase activity; INVOLVED IN: glycerol metabolic process
Medtr6g082860	'11.9.3.3'	'lipid metabolism.lipid degradation.lysophospholipases.glycerophosphodiester phosphodiesterase'	putative; FUNCTIONS IN: transmembrane receptor protein serine/threonine kinase activity
Medtr6g083270	'11.9.3.3'	'lipid metabolism.lipid degradation.lysophospholipases.glycerophosphodiester phosphodiesterase'	constitutive 4)
Medtr7g082510	'11.9.3.3'	'lipid metabolism.lipid degradation.lysophospholipases.glycerophosphodiester phosphodiesterase'	ATP binding site (InterPro:IPR017441)
Medtr7g083410	'11.9.3.3'	'lipid metabolism.lipid degradation.lysophospholipases.glycerophosphodiester phosphodiesterase'	glycerophosphodiester phosphodiesterase activity; INVOLVED IN: glycerol metabolic process
Medtr6g092790	'11.9.3.4'	'lipid metabolism.lipid degradation.lysophospholipases.phospholipase A2'	which specifically hydrolyzes the sn-2 position of phospholipids. The enzyme has a preference towards linoleoyl acyl chain over palmitoyl acyl chain. It also has a slight preference for phosphatidylcholine over phosphatidylethanolamine.; PLA2-ALPHA; FUNCTIONS IN: phospholipase A2 activity; INVOLVED IN: phospholipid metabolic process
Medtr7g015710	'11.9.3.5'	'lipid metabolism.lipid degradation.lysophospholipases.phosphoinositide phospholipase C'	phosphoric diester hydrolase activity; INVOLVED IN: intracellular signaling pathway
Medtr4g053785	'11.9.4.13'	'lipid metabolism.lipid degradation.beta-oxidation.acyl CoA reductase'	involved in cuticular wax biosynthesis. Lines carrying recessive mutations are deficient in primary alcohol and have glossy stem surfaces.; ECERIFERUM 4 (CER4); FUNCTIONS IN: oxidoreductase activity
Medtr4g053880	'11.9.4.13'	'lipid metabolism.lipid degradation.beta-oxidation.acyl CoA reductase'	involved in cuticular wax biosynthesis. Lines carrying recessive mutations are deficient in primary alcohol and have glossy stem surfaces.; ECERIFERUM 4 (CER4); FUNCTIONS IN: oxidoreductase activity
Medtr5g012920	'11.9.4.2'	'lipid metabolism.lipid degradation.beta-oxidation.acyl CoA DH'	drought stress
Medtr3g046330	'11.9.4.3'	'lipid metabolism.lipid degradation.beta-oxidation.enoyl CoA hydratase'	catalytic activity; INVOLVED IN: response to karrikin
Medtr7g024300	'11.9.4.3'	'lipid metabolism.lipid degradation.beta-oxidation.enoyl CoA hydratase'	delta2-enoyl CoA isomerase
Medtr3g098160	'11.9.4.5'	'lipid metabolism.lipid degradation.beta-oxidation.acyl-CoA thioesterase'	acting on ester bonds
Medtr6g087670	'11.9.4.9'	'lipid metabolism.lipid degradation.beta-oxidation.multifunctional'	similar to CuMFP with L-3-hydroxyacyl-CoA hydrolyase
Medtr5g059820	'12.1.1'	'N-metabolism.nitrate metabolism.NR'	nitrate reductase (NADH) activity; INVOLVED IN: nitric oxide biosynthetic process
Medtr7g089970	'12.2.1.1'	'N-metabolism.ammonia metabolism.glutamate synthase.ferredoxin dependent'	glutamate synthase (ferredoxin) activity; INVOLVED IN: response to light stimulus
Medtr2g021242	'12.2.2'	'N-metabolism.ammonia metabolism.glutamine synthetase'	chloroplast precursor (EC 6.3.1.2) (Glutamate--ammonia ligase) (Chloroplast GS2) - Medicago sativa (Alfalfa) & (at5g35630 : 640.0) chloroplastic glutamine synthetase; glutamine synthetase 2 (GS2); FUNCTIONS IN: glutamate-ammonia ligase activity; INVOLVED IN: in 8 processes; LOCATED IN: in 6 components; EXPRESSED IN: 23 plant structures; EXPRESSED DURING: 14 growth stages; CONTAINS InterPro DOMAIN…
Medtr2g021255	'12.2.2'	'N-metabolism.ammonia metabolism.glutamine synthetase'	chloroplast precursor (EC 6.3.1.2) (Glutamate--ammonia ligase) (Chloroplast GS2) - Medicago sativa (Alfalfa) & (at5g35630 : 691.0) chloroplastic glutamine synthetase; glutamine synthetase 2 (GS2); FUNCTIONS IN: glutamate-ammonia ligase activity; INVOLVED IN: in 8 processes; LOCATED IN: in 6 components; EXPRESSED IN: 23 plant structures; EXPRESSED DURING: 14 growth stages; CONTAINS InterPro DOMAIN…
Medtr8g091280	'13.1.1.2.1'	'amino acid metabolism.synthesis.central amino acid metabolism.aspartate.aspartate aminotransferase'	transferase activity
Medtr5g071360	'13.1.3.1.1'	'amino acid metabolism.synthesis.aspartate family.asparagine.asparagine synthetase'	root [glutamine-hydrolyzing] (EC 6.3.5.4) (Glutamine-dependent asparagine synthetase) - Pisum sativum (Garden pea) & (at3g47340 : 1009.0) encodes a glutamine-dependent asparagine synthetase
Medtr6g027920	'13.1.3.4'	'amino acid metabolism.synthesis.aspartate family.methionine'	involved in methionine regeneration via the activated methyl cycle (SAM cycle). The protein undergoes thiolation following treatment with the oxidant tert-butylhydroperoxide.; COBALAMIN-INDEPENDENT METHIONINE SYNTHASE (ATCIMS); FUNCTIONS IN: 5-methyltetrahydropteroyltriglutamate-homocysteine S-methyltransferase activity
Medtr7g086300	'13.1.3.4'	'amino acid metabolism.synthesis.aspartate family.methionine'	involved in methionine regeneration via the activated methyl cycle (SAM cycle). The protein undergoes thiolation following treatment with the oxidant tert-butylhydroperoxide.; COBALAMIN-INDEPENDENT METHIONINE SYNTHASE (ATCIMS); FUNCTIONS IN: 5-methyltetrahydropteroyltriglutamate-homocysteine S-methyltransferase activity
Medtr7g102120	'13.1.3.4'	'amino acid metabolism.synthesis.aspartate family.methionine'	S-adenosylmethionine biosynthetic process; LOCATED IN: plasma membrane; EXPRESSED IN: 25 plant structures; EXPRESSED DURING: 16 growth stages; CONTAINS InterPro DOMAIN/s: S-adenosylmethionine synthetase (InterPro:IPR002133)
Medtr2g008430	'13.1.3.5.3'	'amino acid metabolism.synthesis.aspartate family.lysine.LL-diaminopimelic acid aminotransferase'	transferring nitrogenous groups
Medtr6g033260	'13.1.3.6.1.1'	'amino acid metabolism.synthesis.aspartate family.misc.homoserine.aspartate kinase'	which allow binding to a extreme variety of ligands. Can function as a monomer or as a dimer with acetohydroxyacid synthase (HSDH).; aspartate kinase 1 (AK-LYS1); FUNCTIONS IN: aspartate kinase activity; INVOLVED IN: cellular amino acid biosynthetic process; LOCATED IN: chloroplast; EXPRESSED IN: 24 plant structures; EXPRESSED DURING: 15 growth stages; CONTAINS InterPro DOMAIN/s: Aspartate kinase
Medtr5g064500	'13.1.6.1.1'	'amino acid metabolism.synthesis.aromatic aa.chorismate.3-deoxy-D-arabino-heptulosonate 7-phosphate synthase'	chloroplast precursor (EC 2.5.1.54) (Phospho-2-keto-3-deoxyheptonate aldolase 1) (DAHP synthetase 1) (3-deoxy-D-arabino-heptulosonate 7-phosphate synthase 1) - Nicotiana tabacum (Common tob & (at1g22410 : 855.0) Class-II DAHP synthetase family protein; FUNCTIONS IN: 3-deoxy-7-phosphoheptulonate synthase activity; INVOLVED IN: aromatic amino acid family biosynthetic process; LOCATED IN: membrane; …
Medtr8g063470	'13.1.6.1.5'	'amino acid metabolism.synthesis.aromatic aa.chorismate.shikimate kinase'	kinase activity
Medtr1g013820	'13.1.6.2.1'	'amino acid metabolism.synthesis.aromatic aa.phenylalanine and tyrosine.chorismate mutase'	type II (InterPro:IPR020822)
Medtr2g084875	'13.1.6.3.1'	'amino acid metabolism.synthesis.aromatic aa.phenylalanine.arogenate dehydratase / prephenate dehydratase'	it is 98 times more active with arogenate than prephenate in enzymatic assays.; arogenate dehydratase 6 (ADT6); FUNCTIONS IN: arogenate dehydratase activity
Medtr4g055310	'13.1.6.3.1'	'amino acid metabolism.synthesis.aromatic aa.phenylalanine.arogenate dehydratase / prephenate dehydratase'	Prephenate dehydratase
Medtr3g071980	'13.1.6.4.1'	'amino acid metabolism.synthesis.aromatic aa.tyrosine.arogenate dehydrogenase \& prephenate dehydrogenase'	prephenate dehydrogenase (NADP+) activity
Medtr4g023390	'13.1.6.5'	'amino acid metabolism.synthesis.aromatic aa.tryptophan'	cell wall; EXPRESSED IN: 24 plant structures; EXPRESSED DURING: 13 growth stages; CONTAINS InterPro DOMAIN/s: C2 membrane targeting protein (InterPro:IPR018029)
Medtr7g076900	'13.1.6.5'	'amino acid metabolism.synthesis.aromatic aa.tryptophan'	C2 calcium/lipid-binding domain
Medtr7g096080	'13.1.6.5.5'	'amino acid metabolism.synthesis.aromatic aa.tryptophan.tryptophan synthase'	the penultimate reaction in the biosynthesis of tryptophan. Functions as a heterocomplex with tryptophan synthase beta subunit (TSA2).; tryptophan synthase alpha chain (TSA1); FUNCTIONS IN: tryptophan synthase activity; INVOLVED IN: tryptophan biosynthetic process
Medtr6g007070	'13.2.1.2'	'amino acid metabolism.degradation.central amino acid metabolism.aspartate'	oxidoreductase activity
Medtr4g058740	'13.2.3.5.1'	'mino acid metabolism.degradation.aspartate family.lysine.lysine decarboxylase'	T
Medtr4g022430	'13.2.4.1'	'amino acid metabolism.degradation.branched chain group.shared'	glyoxysome) 3-ketoacyl-CoA thiolase
Medtr4g132360	'13.2.5.2'	'amino acid metabolism.degradation.serine-glycine-cysteine group.glycine'	mitochondrial precursor (EC 2.1.2.10) (Glycine cleavage system T protein) (GCVT) - Pisum sativum (Garden pea) & (at1g11860 : 747.0) Glycine cleavage T-protein family; FUNCTIONS IN: aminomethyltransferase activity; EXPRESSED IN: 23 plant structures; EXPRESSED DURING: 14 growth stages; CONTAINS InterPro DOMAIN/s: Glycine cleavage system T protein (InterPro:IPR006223)
Medtr1g099050	'13.2.7'	'amino acid metabolism.degradation.histidine'	carboxy-lyase activity
Medtr2g436830	'15'	'metal handling'	T
Medtr1g085140	'15.2'	'metal handling.binding	'(at3g62020 : 285.0) germin-like protein (GLP10); germin-like protein 10 (GLP10); FUNCTIONS IN: manganese ion binding
Medtr1g085500	'15.2'	'metal handling.binding	'(at3g62020 : 287.0) germin-like protein (GLP10); germin-like protein 10 (GLP10); FUNCTIONS IN: manganese ion binding
Medtr3g087770	'15.2'	'metal handling.binding	'(at4g39700 : 187.0) Heavy metal transport/detoxification superfamily protein ; FUNCTIONS IN: metal ion binding; INVOLVED IN: metal ion transport; LOCATED IN: cellular_component unknown; CONTAINS InterPro DOMAIN/s: Heavy metal transport/detoxification protein (InterPro:IPR006121); BEST Arabidopsis thaliana protein match is: Heavy metal transport/detoxification superfamily protein (TAIR:AT1G22990.…
Medtr3g099030	'15.2'	'metal handling.binding	'(at5g50740 : 171.0) Heavy metal transport/detoxification superfamily protein ; FUNCTIONS IN: metal ion binding; INVOLVED IN: metal ion transport; LOCATED IN: cellular_component unknown; EXPRESSED IN: 20 plant structures; EXPRESSED DURING: 13 growth stages; CONTAINS InterPro DOMAIN/s: Heavy metal transport/detoxification protein (InterPro:IPR006121); BEST Arabidopsis thaliana protein match is: fa…
Medtr4g073040	'15.2'	'metal handling.binding	'(at4g38580 : 218.0) putative farnesylated protein (At4g38580) mRNA
Medtr5g069180	'15.2'	'metal handling.binding	'(at5g24580 : 192.0) Heavy metal transport/detoxification superfamily protein ; FUNCTIONS IN: copper ion binding
Medtr8g018747	'15.2'	'metal handling.binding	'(at5g24580 : 104.0) Heavy metal transport/detoxification superfamily protein ; FUNCTIONS IN: copper ion binding
Medtr3g105550	'16.1'	'secondary metabolism.isoprenoids'	encodes KCS10
Medtr4g005190	'16.1'	'secondary metabolism.isoprenoids'	conserved site (InterPro:IPR002365)
Medtr5g024880	'16.1.2.3'	'secondary metabolism.isoprenoids.mevalonate pathway.HMG-CoA reductase'	class I/II & (q01559|hmdh_nicsy : 771.0) 3-hydroxy-3-methylglutaryl-coenzyme A reductase (EC 1.1.1.34) (HMG-CoA reductase) - Nicotiana sylvestris (Wood tobacco) & (at1g76490 : 756.0) Encodes a 3-hydroxy-3-methylglutaryl coenzyme A reductase
Medtr5g076620	'16.1.4.1'	'secondary metabolism.isoprenoids.carotenoids.phytoene synthase'	chloroplast precursor (EC 2.5.1.-) - Capsicum annuum (Bell pepper) & (at5g17230 : 500.0) Encodes phytoene synthase.; PHYTOENE SYNTHASE (PSY); CONTAINS InterPro DOMAIN/s: Squalene/phytoene synthase
Medtr2g040060	'16.1.4.4'	'secondary metabolism.isoprenoids.carotenoids.lycopene epsilon cyclase'	member of the xanthophyll class of carotenoids. Encodes lycopene epsilon cyclase; LUTEIN DEFICIENT 2 (LUT2); CONTAINS InterPro DOMAIN/s: Lycopene beta/epsilon cyclase (InterPro:IPR008671)
Medtr2g012870	'16.1.5'	'secondary metabolism.isoprenoids.terpenoids'	a volatile plant defense C16-homoterpene. GES transcript levels rise in response to alamethicin
Medtr2g012900	'16.1.5'	'secondary metabolism.isoprenoids.terpenoids'	a volatile plant defense C16-homoterpene. GES transcript levels rise in response to alamethicin
Medtr4g092010	'16.1.5'	'secondary metabolism.isoprenoids.terpenoids'	metal-binding domain (InterPro:IPR005630)
Medtr4g092020	'16.1.5'	'secondary metabolism.isoprenoids.terpenoids'	metal-binding domain (InterPro:IPR005630)
Medtr2g008330	'16.10'	'secondary metabolism.simple phenols'	a member of laccase family of genes (17 members in Arabidopsis).; laccase 14 (LAC14); FUNCTIONS IN: laccase activity; INVOLVED IN: oxidation reduction
Medtr3g462760	'16.10'	'secondary metabolism.simple phenols'	a member of laccase family (17 members in Arabidopsis). Might be involved in cell wall biosynthesis. Mutants have a mild irregular xylem phenotype.; IRREGULAR XYLEM 12 (IRX12); FUNCTIONS IN: laccase activity; INVOLVED IN: secondary cell wall biogenesis; LOCATED IN: endomembrane system
Medtr4g015120	'16.10'	'secondary metabolism.simple phenols'	a member of laccase family (17 members in Arabidopsis). Might be involved in cell wall biosynthesis. Mutants have a mild irregular xylem phenotype.; IRREGULAR XYLEM 12 (IRX12); FUNCTIONS IN: laccase activity; INVOLVED IN: secondary cell wall biogenesis; LOCATED IN: endomembrane system
Medtr4g064530	'16.10'	'secondary metabolism.simple phenols'	knockout mutant had reduced root elongation under PEG-induced dehydration; laccase 2 (LAC2); FUNCTIONS IN: laccase activity; INVOLVED IN: response to water deprivation; LOCATED IN: endomembrane system
Medtr5g020600	'16.10'	'secondary metabolism.simple phenols'	a member of laccase family of genes (17 members in Arabidopsis).; laccase 11 (LAC11); FUNCTIONS IN: laccase activity; INVOLVED IN: oxidation reduction
Medtr5g081790	'16.10'	'secondary metabolism.simple phenols'	a member of laccase family (17 members in Arabidopsis). Might be involved in cell wall biosynthesis. Mutants have a mild irregular xylem phenotype.; IRREGULAR XYLEM 12 (IRX12); FUNCTIONS IN: laccase activity; INVOLVED IN: secondary cell wall biogenesis; LOCATED IN: endomembrane system
Medtr5g081810	'16.10'	'secondary metabolism.simple phenols'	a member of laccase family (17 members in Arabidopsis). Might be involved in cell wall biosynthesis. Mutants have a mild irregular xylem phenotype.; IRREGULAR XYLEM 12 (IRX12); FUNCTIONS IN: laccase activity; INVOLVED IN: secondary cell wall biogenesis; LOCATED IN: endomembrane system
Medtr7g060460	'16.10'	'secondary metabolism.simple phenols'	a member of laccase family of genes (17 members in Arabidopsis).; laccase 17 (LAC17); FUNCTIONS IN: laccase activity; INVOLVED IN: oxidation reduction
Medtr7g062310	'16.10'	'secondary metabolism.simple phenols'	a member of laccase family of genes (17 members in Arabidopsis).; laccase 17 (LAC17); FUNCTIONS IN: laccase activity; INVOLVED IN: oxidation reduction
Medtr7g458880	'16.10'	'secondary metabolism.simple phenols'	a member of laccase family of genes (17 members in Arabidopsis).; laccase 17 (LAC17); FUNCTIONS IN: laccase activity; INVOLVED IN: oxidation reduction
Medtr3g102010	'16.2'	'secondary metabolism.phenylpropanoids'	transferring acyl groups other than amino-acyl groups
Medtr3g465950	'16.2'	'secondary metabolism.phenylpropanoids'	transferring acyl groups other than amino-acyl groups
Medtr8g071130	'16.2'	'secondary metabolism.phenylpropanoids'	NmrA-like (InterPro:IPR008030); BEST Arabidopsis thaliana protein match is: pinoresinol reductase 2 (TAIR:AT4G13660.1); Has 2085 Blast hits to 2085 proteins in 479 species: Archae - 27; Bacteria - 779; Metazoa - 2; Fungi - 496; Plants - 600; Viruses - 0; Other Eukaryotes - 181 (source: NCBI BLink). & (p52578|ifrh_soltu : 268.0) Isoflavone reductase homolog (EC 1.3.1.-) (CP100) - Solanum tuberosum…
Medtr1g064090	'16.2.1.1'	'secondary metabolism.phenylpropanoids.lignin biosynthesis.PAL'	a phenylalanine ammonia-lyase. Arabidopsis has four PALs: AT2G37040 (PAL1)
Medtr5g098720	'16.2.1.1'	'secondary metabolism.phenylpropanoids.lignin biosynthesis.PAL'	a phenylalanine ammonia-lyase. Arabidopsis has four PALs: AT2G37040 (PAL1)
Medtr7g101395	'16.2.1.1'	'secondary metabolism.phenylpropanoids.lignin biosynthesis.PAL'	a phenylalanine ammonia-lyase. Arabidopsis has four PALs: AT2G37040 (PAL1)
Medtr7g101425	'16.2.1.1'	'secondary metabolism.phenylpropanoids.lignin biosynthesis.PAL'	a phenylalanine ammonia-lyase. Arabidopsis has four PALs: AT2G37040 (PAL1)
Medtr1g025950	'16.2.1.10'	'secondary metabolism.phenylpropanoids.lignin biosynthesis.CAD'	zinc ion binding; INVOLVED IN: oxidation reduction; LOCATED IN: apoplast; EXPRESSED IN: 25 plant structures; EXPRESSED DURING: 15 growth stages; CONTAINS InterPro DOMAIN/s: GroES-like (InterPro:IPR011032)
Medtr1g107425	'16.2.1.10'	'secondary metabolism.phenylpropanoids.lignin biosynthesis.CAD'	caffeyl
Medtr5g031300	'16.2.1.10'	'secondary metabolism.phenylpropanoids.lignin biosynthesis.CAD'	zinc ion binding; INVOLVED IN: response to bacterium
Medtr5g075450	'16.2.1.2'	'secondary metabolism.phenylpropanoids.lignin biosynthesis.C4H'	growth and development.; cinnamate-4-hydroxylase (C4H); FUNCTIONS IN: trans-cinnamate 4-monooxygenase activity; INVOLVED IN: in 9 processes; LOCATED IN: endoplasmic reticulum
Medtr4g005750	'16.2.1.3'	'secondary metabolism.phenylpropanoids.lignin biosynthesis.4CL'	which is involved in the last step of the general phenylpropanoid pathway. The catalytic efficiency was in the following (descending) order: p-coumaric acid
Medtr5g007640	'16.2.1.3'	'secondary metabolism.phenylpropanoids.lignin biosynthesis.4CL'	which is involved in the last step of the general phenylpropanoid pathway. mRNA levels are not induced in response to wounding or to fungal infection by P. parasitica. mRNA is expressed in flowers
Medtr4g094925	'16.2.1.6'	'secondary metabolism.phenylpropanoids.lignin biosynthesis.CCoAOMT'	response to cadmium ion; LOCATED IN: cytosol; EXPRESSED IN: 24 plant structures; EXPRESSED DURING: 14 growth stages; CONTAINS InterPro DOMAIN/s: O-methyltransferase
Medtr6g091680	'16.2.1.6'	'secondary metabolism.phenylpropanoids.lignin biosynthesis.CCoAOMT'	inflorescence meristem
Medtr3g031650	'16.2.1.7'	'secondary metabolism.phenylpropanoids.lignin biosynthesis.CCR1'	binding
Medtr4g006940	'16.2.1.7'	'secondary metabolism.phenylpropanoids.lignin biosynthesis.CCR1'	NAD(P)-binding domain (InterPro:IPR016040); BEST Arabidopsis thaliana protein match is: cinnamoyl coa reductase 1 (TAIR:AT1G15950.1); Has 10779 Blast hits to 10766 proteins in 1817 species: Archae - 140; Bacteria - 4512; Metazoa - 410; Fungi - 946; Plants - 2512; Viruses - 14; Other Eukaryotes - 2245 (source: NCBI BLink). & (gnl|cdd|36715 : 361.0) no description available & (p51104|dfra_diaca : 1…
Medtr6g406250	'16.2.1.7'	'secondary metabolism.phenylpropanoids.lignin biosynthesis.CCR1'	binding
Medtr3g092900	'16.2.1.9'	'secondary metabolism.phenylpropanoids.lignin biosynthesis.COMT'	quercetin 3-O-methyltransferase activity
Medtr4g050190	'16.4.1'	'secondary metabolism.N misc.alkaloid-like'	it lacks a conserved catalytic glutamate residue found in active SS enzymes and it is not expected to have SS activity.; strictosidine synthase-like 3 (SSL3); FUNCTIONS IN: strictosidine synthase activity; INVOLVED IN: alkaloid biosynthetic process
Medtr4g094492	'16.4.1'	'secondary metabolism.N misc.alkaloid-like'	oxidoreductase activity
Medtr5g091980	'16.4.1'	'secondary metabolism.N misc.alkaloid-like'	biosynthetic process; LOCATED IN: endoplasmic reticulum
Medtr6g088665	'16.4.1'	'secondary metabolism.N misc.alkaloid-like'	acting on paired donors
Medtr7g490330	'16.4.1'	'secondary metabolism.N misc.alkaloid-like'	biosynthetic process; LOCATED IN: endoplasmic reticulum
Medtr8g037880	'16.5.1.1.1.10'	'secondary metabolism.sulfur-containing.glucosinolates.synthesis.aliphatic.flavin-containing monooxygenase'	monooxygenase activity
Medtr4g026200	'16.5.1.1.4.1'	'secondary metabolism.sulfur-containing.glucosinolates.synthesis.shared.CYP83B1 phenylacetaldoxime monooxygenase'	family 83
Medtr0251s0050	'16.5.1.2.3'	'secondary metabolism.sulfur-containing.glucosinolates.regulation.indole'	DNA-binding (InterPro:IPR001005)
Medtr2g013370	'16.5.1.2.3'	'secondary metabolism.sulfur-containing.glucosinolates.regulation.indole'	Dof-type (InterPro:IPR003851); BEST Arabidopsis thaliana protein match is: OBF-binding protein 3 (TAIR:AT3G55370.3); Has 35333 Blast hits to 34131 proteins in 2444 species: Archae - 798; Bacteria - 22429; Metazoa - 974; Fungi - 991; Plants - 531; Viruses - 0; Other Eukaryotes - 9610 (source: NCBI BLink). & (p38564|mnb1a_maize : 99.0) Dof zinc finger protein MNB1A - Zea mays (Maize) & (reliability…
Medtr7g051510	'16.5.1.3.1'	'secondary metabolism.sulfur-containing.glucosinolates.degradation.myrosinase'	family 1 & (at5g44640 : 300.0) beta glucosidase 13 (BGLU13); FUNCTIONS IN: cation binding
Medtr1g110930	'16.7'	'secondary metabolism.wax'	a member of the 3-ketoacyl-CoA synthase family involved in the biosynthesis of VLCFA (very long chain fatty acids).; 3-ketoacyl-CoA synthase 6 (KCS6); FUNCTIONS IN: transferase activity
Medtr2g025710	'16.7'	'secondary metabolism.wax'	T
Medtr4g129630	'16.7'	'secondary metabolism.wax'	binding
Medtr5g056510	'16.7'	'secondary metabolism.wax'	a member of the 3-ketoacyl-CoA synthase family involved in the biosynthesis of VLCFA (very long chain fatty acids).; 3-ketoacyl-CoA synthase 6 (KCS6); FUNCTIONS IN: transferase activity
Medtr8g009560	'16.7'	'secondary metabolism.wax'	and they also lack the secondary alcohols and ketones. These suggested the CER1 protein is an aldehyde decarbonylase
Medtr8g009590	'16.7'	'secondary metabolism.wax'	and they also lack the secondary alcohols and ketones. These suggested the CER1 protein is an aldehyde decarbonylase
Medtr2g008220	'16.8.1'	'secondary metabolism.flavonoids.anthocyanins'	transferring glycosyl groups; INVOLVED IN: metabolic process; LOCATED IN: cellular_component unknown; CONTAINS InterPro DOMAIN/s: UDP-glucuronosyl/UDP-glucosyltransferase (InterPro:IPR002213); BEST Arabidopsis thaliana protein match is: UDP-Glycosyltransferase superfamily protein (TAIR:AT5G65550.1); Has 5420 Blast hits to 5242 proteins in 247 species: Archae - 0; Bacteria - 62; Metazoa - 299; Fun…
Medtr4g015790	'16.8.1'	'secondary metabolism.flavonoids.anthocyanins'	iron ion binding; INVOLVED IN: response to salt stress
Medtr7g067120	'16.8.1'	'secondary metabolism.flavonoids.anthocyanins'	transferring glycosyl groups; INVOLVED IN: metabolic process; LOCATED IN: cellular_component unknown; CONTAINS InterPro DOMAIN/s: UDP-glucuronosyl/UDP-glucosyltransferase (InterPro:IPR002213); BEST Arabidopsis thaliana protein match is: UDP-Glycosyltransferase superfamily protein (TAIR:AT5G65550.1); Has 5420 Blast hits to 5242 proteins in 247 species: Archae - 0; Bacteria - 62; Metazoa - 299; Fun…
Medtr8g068330	'16.8.1'	'secondary metabolism.flavonoids.anthocyanins'	transferring glycosyl groups; INVOLVED IN: metabolic process; LOCATED IN: cellular_component unknown; CONTAINS InterPro DOMAIN/s: UDP-glucuronosyl/UDP-glucosyltransferase (InterPro:IPR002213); BEST Arabidopsis thaliana protein match is: UDP-Glycosyltransferase superfamily protein (TAIR:AT5G65550.1); Has 5420 Blast hits to 5242 proteins in 247 species: Archae - 0; Bacteria - 62; Metazoa - 299; Fun…
Medtr5g011250	'16.8.1.1'	'secondary metabolism.flavonoids.anthocyanins.leucocyanidin dioxygenase'	which is involved in proanthocyanin biosynthesis. Mutant analysis suggests that this gene is also involved in vacuole formation.; leucoanthocyanidin dioxygenase (LDOX); CONTAINS InterPro DOMAIN/s: Oxoglutarate/iron-dependent oxygenase (InterPro:IPR005123); BEST Arabidopsis thaliana protein match is: flavonol synthase 1 (TAIR:AT5G08640.2); Has 35333 Blast hits to 34131 proteins in 2444 species: Ar…
Medtr2g089650	'16.8.1.21'	'secondary metabolism.flavonoids.anthocyanins.anthocyanin 5-aromatic acyltransferase'	transferring acyl groups other than amino-acyl groups
Medtr6g015310	'16.8.1.21'	'secondary metabolism.flavonoids.anthocyanins.anthocyanin 5-aromatic acyltransferase'	transferring acyl groups other than amino-acyl groups
Medtr1g115820	'16.8.2'	'secondary metabolism.flavonoids.chalcones'	response to UV-B
Medtr1g115840	'16.8.2'	'secondary metabolism.flavonoids.chalcones'	response to UV-B
Medtr3g083130	'16.8.2'	'secondary metabolism.flavonoids.chalcones'	Aldo/keto reductase subgroup (InterPro:IPR020471)
Medtr5g097900	'16.8.2'	'secondary metabolism.flavonoids.chalcones'	Aldo/keto reductase subgroup (InterPro:IPR020471)
Medtr5g097910	'16.8.2'	'secondary metabolism.flavonoids.chalcones'	Aldo/keto reductase subgroup (InterPro:IPR020471)
Medtr5g097940	'16.8.2'	'secondary metabolism.flavonoids.chalcones'	Aldo/keto reductase subgroup (InterPro:IPR020471)
Medtr1g097910	'16.8.2.1'	'secondary metabolism.flavonoids.chalcones.naringenin-chalcone synthase'	a key enzyme involved in the biosynthesis of flavonoids. Required for the accumulation of purple anthocyanins in leaves and stems. Also involved in the regulation of auxin transport and the modulation of root gravitropism.; TRANSPARENT TESTA 4 (TT4); FUNCTIONS IN: naringenin-chalcone synthase activity; INVOLVED IN: in 11 processes; LOCATED IN: plant-type vacuole membrane
Medtr1g097935	'16.8.2.1'	'secondary metabolism.flavonoids.chalcones.naringenin-chalcone synthase'	a key enzyme involved in the biosynthesis of flavonoids. Required for the accumulation of purple anthocyanins in leaves and stems. Also involved in the regulation of auxin transport and the modulation of root gravitropism.; TRANSPARENT TESTA 4 (TT4); FUNCTIONS IN: naringenin-chalcone synthase activity; INVOLVED IN: in 11 processes; LOCATED IN: plant-type vacuole membrane
Medtr1g098140	'16.8.2.1'	'secondary metabolism.flavonoids.chalcones.naringenin-chalcone synthase'	a key enzyme involved in the biosynthesis of flavonoids. Required for the accumulation of purple anthocyanins in leaves and stems. Also involved in the regulation of auxin transport and the modulation of root gravitropism.; TRANSPARENT TESTA 4 (TT4); FUNCTIONS IN: naringenin-chalcone synthase activity; INVOLVED IN: in 11 processes; LOCATED IN: plant-type vacuole membrane
Medtr3g083920	'16.8.2.1'	'secondary metabolism.flavonoids.chalcones.naringenin-chalcone synthase'	a key enzyme involved in the biosynthesis of flavonoids. Required for the accumulation of purple anthocyanins in leaves and stems. Also involved in the regulation of auxin transport and the modulation of root gravitropism.; TRANSPARENT TESTA 4 (TT4); FUNCTIONS IN: naringenin-chalcone synthase activity; INVOLVED IN: in 11 processes; LOCATED IN: plant-type vacuole membrane
Medtr5g007713	'16.8.2.1'	'secondary metabolism.flavonoids.chalcones.naringenin-chalcone synthase'	a key enzyme involved in the biosynthesis of flavonoids. Required for the accumulation of purple anthocyanins in leaves and stems. Also involved in the regulation of auxin transport and the modulation of root gravitropism.; TRANSPARENT TESTA 4 (TT4); FUNCTIONS IN: naringenin-chalcone synthase activity; INVOLVED IN: in 11 processes; LOCATED IN: plant-type vacuole membrane
Medtr5g007717	'16.8.2.1'	'secondary metabolism.flavonoids.chalcones.naringenin-chalcone synthase'	a key enzyme involved in the biosynthesis of flavonoids. Required for the accumulation of purple anthocyanins in leaves and stems. Also involved in the regulation of auxin transport and the modulation of root gravitropism.; TRANSPARENT TESTA 4 (TT4); FUNCTIONS IN: naringenin-chalcone synthase activity; INVOLVED IN: in 11 processes; LOCATED IN: plant-type vacuole membrane
Medtr5g007730	'16.8.2.1'	'secondary metabolism.flavonoids.chalcones.naringenin-chalcone synthase'	a key enzyme involved in the biosynthesis of flavonoids. Required for the accumulation of purple anthocyanins in leaves and stems. Also involved in the regulation of auxin transport and the modulation of root gravitropism.; TRANSPARENT TESTA 4 (TT4); FUNCTIONS IN: naringenin-chalcone synthase activity; INVOLVED IN: in 11 processes; LOCATED IN: plant-type vacuole membrane
Medtr7g016700	'16.8.2.1'	'secondary metabolism.flavonoids.chalcones.naringenin-chalcone synthase'	a key enzyme involved in the biosynthesis of flavonoids. Required for the accumulation of purple anthocyanins in leaves and stems. Also involved in the regulation of auxin transport and the modulation of root gravitropism.; TRANSPARENT TESTA 4 (TT4); FUNCTIONS IN: naringenin-chalcone synthase activity; INVOLVED IN: in 11 processes; LOCATED IN: plant-type vacuole membrane
Medtr7g016800	'16.8.2.1'	'secondary metabolism.flavonoids.chalcones.naringenin-chalcone synthase'	a key enzyme involved in the biosynthesis of flavonoids. Required for the accumulation of purple anthocyanins in leaves and stems. Also involved in the regulation of auxin transport and the modulation of root gravitropism.; TRANSPARENT TESTA 4 (TT4); FUNCTIONS IN: naringenin-chalcone synthase activity; INVOLVED IN: in 11 processes; LOCATED IN: plant-type vacuole membrane
Medtr7g016820	'16.8.2.1'	'secondary metabolism.flavonoids.chalcones.naringenin-chalcone synthase'	a key enzyme involved in the biosynthesis of flavonoids. Required for the accumulation of purple anthocyanins in leaves and stems. Also involved in the regulation of auxin transport and the modulation of root gravitropism.; TRANSPARENT TESTA 4 (TT4); FUNCTIONS IN: naringenin-chalcone synthase activity; INVOLVED IN: in 11 processes; LOCATED IN: plant-type vacuole membrane
Medtr0009s0400	'16.8.3'	'secondary metabolism.flavonoids.dihydroflavonols'	acting on paired donors
Medtr0078s0010	'16.8.3'	'secondary metabolism.flavonoids.dihydroflavonols'	T
Medtr0078s0200	'16.8.3'	'secondary metabolism.flavonoids.dihydroflavonols'	T
Medtr1g070085	'16.8.3'	'secondary metabolism.flavonoids.dihydroflavonols'	acting on paired donors
Medtr1g070100	'16.8.3'	'secondary metabolism.flavonoids.dihydroflavonols'	acting on paired donors
Medtr2g040530	'16.8.3'	'secondary metabolism.flavonoids.dihydroflavonols'	a UDP glycosyltransferase (UGT). HYR1 glucosylates hypostatin
Medtr3g092890	'16.8.3'	'secondary metabolism.flavonoids.dihydroflavonols'	acting on paired donors
Medtr5g055680	'16.8.3'	'secondary metabolism.flavonoids.dihydroflavonols'	T
Medtr5g065010	'16.8.3'	'secondary metabolism.flavonoids.dihydroflavonols'	acting on paired donors
Medtr8g006260	'16.8.3'	'secondary metabolism.flavonoids.dihydroflavonols'	T
Medtr7g074710	'16.8.3.1'	'secondary metabolism.flavonoids.dihydroflavonols.dihydroflavonol 4-reductase'	oxidoreductase activity
Medtr7g074880	'16.8.3.1'	'secondary metabolism.flavonoids.dihydroflavonols.dihydroflavonol 4-reductase'	oxidoreductase activity
Medtr4g109470	'16.8.3.3'	'secondary metabolism.flavonoids.dihydroflavonols.flavonoid 3''-monooxygenase'	Cytochrome P450
Medtr7g056103	'16.8.3.3'	'secondary metabolism.flavonoids.dihydroflavonols.flavonoid 3''-monooxygenase'	family 93
Medtr8g020940	'16.8.3.3'	'secondary metabolism.flavonoids.dihydroflavonols.flavonoid 3''-monooxygenase'	Cytochrome P450
Medtr7g117405	'16.8.4'	'secondary metabolism.flavonoids.flavonols'	transferase activity
Medtr4g485630	'16.8.4.2'	'secondary metabolism.flavonoids.flavonols.flavonol 3-O-glycosyltransferase'	transferring hexosyl groups
Medtr8g044140	'16.8.4.2'	'secondary metabolism.flavonoids.flavonols.flavonol 3-O-glycosyltransferase'	UDP-glycosyltransferase activity
Medtr3g007970	'16.8.5.1'	'secondary metabolism.flavonoids.isoflavones.isoflavone reductase'	putative
Medtr3g111990	'16.8.5.1'	'secondary metabolism.flavonoids.isoflavones.isoflavone reductase'	which catalyzes NADPH-dependent reduction of 8-5' linked lignans such as dehydrodiconiferyl alcohol to give isodihydrodehydrodiconiferyl alcohol.; NmrA-like negative transcriptional regulator family protein; FUNCTIONS IN: phenylcoumaran benzylic ether reductase activity; INVOLVED IN: response to cadmium ion; LOCATED IN: cellular_component unknown; EXPRESSED IN: 25 plant structures; EXPRESSED DURI…
Medtr5g020740	'16.8.5.1'	'secondary metabolism.flavonoids.isoflavones.isoflavone reductase'	putative
Medtr5g020760	'16.8.5.1'	'secondary metabolism.flavonoids.isoflavones.isoflavone reductase'	acting on NADH or NADPH; INVOLVED IN: metabolic process; LOCATED IN: cellular_component unknown; EXPRESSED IN: sepal
Medtr5g020800	'16.8.5.1'	'secondary metabolism.flavonoids.isoflavones.isoflavone reductase'	which catalyzes NADPH-dependent reduction of 8-5' linked lignans such as dehydrodiconiferyl alcohol to give isodihydrodehydrodiconiferyl alcohol.; NmrA-like negative transcriptional regulator family protein; FUNCTIONS IN: phenylcoumaran benzylic ether reductase activity; INVOLVED IN: response to cadmium ion; LOCATED IN: cellular_component unknown; EXPRESSED IN: 25 plant structures; EXPRESSED DURI…
Medtr5g018280	'17'	'hormone metabolism'	methyl IAA esterase activity
Medtr8g008660	'17'	'hormone metabolism'	methyl salicylate esterase activity
Medtr1g024930	'17.1.1'	'hormone metabolism.abscisic acid.synthesis-degradation'	HVA22) family protein; FUNCTIONS IN: molecular_function unknown; INVOLVED IN: biological_process unknown; LOCATED IN: cellular_component unknown; EXPRESSED IN: 24 plant structures; EXPRESSED DURING: 14 growth stages; CONTAINS InterPro DOMAIN/s: TB2/DP1/HVA22 related protein (InterPro:IPR004345); BEST Arabidopsis thaliana protein match is: HVA22-like protein H (ATHVA22H) (TAIR:AT1G19950.1); Has 30…
Medtr5g090580	'17.1.1'	'hormone metabolism.abscisic acid.synthesis-degradation'	a UDP glycosyltransferase (UGT). HYR1 glucosylates hypostatin
Medtr5g091800	'17.1.1'	'hormone metabolism.abscisic acid.synthesis-degradation'	T
Medtr5g025230	'17.1.1.1.10'	'hormone metabolism.abscisic acid.synthesis-degradation.synthesis.9-cis-epoxycarotenoid dioxygenase'	plastoglobule; EXPRESSED IN: 16 plant structures; EXPRESSED DURING: 9 growth stages; CONTAINS InterPro DOMAIN/s: Carotenoid oxygenase (InterPro:IPR004294); BEST Arabidopsis thaliana protein match is: nine-cis-epoxycarotenoid dioxygenase 5 (TAIR:AT1G30100.1); Has 2918 Blast hits to 2864 proteins in 491 species: Archae - 16; Bacteria - 796; Metazoa - 323; Fungi - 173; Plants - 887; Viruses - 0; Oth…
Medtr4g052300	'17.1.1.1.11'	'hormone metabolism.abscisic acid.synthesis-degradation.synthesis.short chain alcohol dehydrogenmase (ABA2)'	binding
Medtr4g052320	'17.1.1.1.11'	'hormone metabolism.abscisic acid.synthesis-degradation.synthesis.short chain alcohol dehydrogenmase (ABA2)'	binding
Medtr2g040500	'17.1.2'	'hormone metabolism.abscisic acid.signal transduction'	catalytic activity; INVOLVED IN: protein amino acid dephosphorylation; LOCATED IN: protein serine/threonine phosphatase complex; EXPRESSED IN: 23 plant structures; EXPRESSED DURING: 14 growth stages; CONTAINS InterPro DOMAIN/s: Protein phosphatase 2C
Medtr8g096670	'17.1.3'	'hormone metabolism.abscisic acid.induced-regulated-responsive-activated'	it may be involved in regulation of autophagy during development.; HVA22 homologue D (HVA22D); FUNCTIONS IN: molecular_function unknown; INVOLVED IN: in 7 processes; LOCATED IN: cellular_component unknown; EXPRESSED IN: 23 plant structures; EXPRESSED DURING: 15 growth stages; CONTAINS InterPro DOMAIN/s: TB2/DP1/HVA22 related protein (InterPro:IPR004345); BEST Arabidopsis thaliana protein match is…
Medtr8g100065	'17.1.3'	'hormone metabolism.abscisic acid.induced-regulated-responsive-activated'	T
Medtr2g100560	'17.2.1'	'hormone metabolism.auxin.synthesis-degradation'	stems
Medtr3g084530	'17.2.1'	'hormone metabolism.auxin.synthesis-degradation'	transferase activity
Medtr3g084540	'17.2.1'	'hormone metabolism.auxin.synthesis-degradation'	transferase activity
Medtr3g072870	'17.2.2'	'hormone metabolism.auxin.signal transduction'	which are likely to promote cell separation in advance of developing lateral root primordia.; like AUX1 3 (LAX3); CONTAINS InterPro DOMAIN/s: Amino acid transporter
Medtr4g415390	'17.2.2'	'hormone metabolism.auxin.signal transduction'	transmembrane (InterPro:IPR013057); BEST Arabidopsis thaliana protein match is: like AUXIN RESISTANT 1 (TAIR:AT5G01240.1); Has 1256 Blast hits to 1251 proteins in 143 species: Archae - 0; Bacteria - 0; Metazoa - 116; Fungi - 283; Plants - 825; Viruses - 0; Other Eukaryotes - 32 (source: NCBI BLink). & (gnl|cdd|36517 : 302.0) no description available & (gnl|cdd|85489 : 220.0) no description availa…
Medtr6g011400	'17.2.2'	'hormone metabolism.auxin.signal transduction'	transporter activity; INVOLVED IN: auxin polar transport
Medtr7g017100	'17.2.2'	'hormone metabolism.auxin.signal transduction'	binding
Medtr8g107360	'17.2.2'	'hormone metabolism.auxin.signal transduction'	pin1 mutants are characterised by an inflorescence meristem that does not initiate any flowers
Medtr1g102750	'17.2.3'	'hormone metabolism.auxin.induced-regulated-responsive-activated'	aldo-keto reductase activity; INVOLVED IN: oxidation reduction; EXPRESSED IN: hypocotyl
Medtr2g013140	'17.2.3'	'hormone metabolism.auxin.induced-regulated-responsive-activated'	nucleus
Medtr2g048210	'17.2.3'	'hormone metabolism.auxin.induced-regulated-responsive-activated'	lateral root morphogenesis; LOCATED IN: plasma membrane; EXPRESSED IN: 23 plant structures; EXPRESSED DURING: 13 growth stages; BEST Arabidopsis thaliana protein match is: Outer arm dynein light chain 1 protein (TAIR:AT1G78230.1); Has 5746 Blast hits to 1796 proteins in 310 species: Archae - 0; Bacteria - 1053; Metazoa - 771; Fungi - 422; Plants - 290; Viruses - 42; Other Eukaryotes - 3168 (sourc…
Medtr2g095430	'17.2.3'	'hormone metabolism.auxin.induced-regulated-responsive-activated'	T
Medtr3g084170	'17.2.3'	'hormone metabolism.auxin.induced-regulated-responsive-activated'	response to cold; LOCATED IN: plasma membrane; EXPRESSED IN: 21 plant structures; EXPRESSED DURING: 13 growth stages; CONTAINS InterPro DOMAIN/s: Auxin responsive SAUR protein (InterPro:IPR003676); BEST Arabidopsis thaliana protein match is: SAUR-like auxin-responsive protein family (TAIR:AT2G21210.1); Has 1324 Blast hits to 1312 proteins in 28 species: Archae - 0; Bacteria - 0; Metazoa - 0; Fung…
Medtr3g099480	'17.2.3'	'hormone metabolism.auxin.induced-regulated-responsive-activated'	T
Medtr3g113310	'17.2.3'	'hormone metabolism.auxin.induced-regulated-responsive-activated'	T
Medtr4g019210	'17.2.3'	'hormone metabolism.auxin.induced-regulated-responsive-activated'	M germinated pollen stage
Medtr4g023030	'17.2.3'	'hormone metabolism.auxin.induced-regulated-responsive-activated'	T
Medtr4g023050	'17.2.3'	'hormone metabolism.auxin.induced-regulated-responsive-activated'	T
Medtr4g072190	'17.2.3'	'hormone metabolism.auxin.induced-regulated-responsive-activated'	T
Medtr4g072300	'17.2.3'	'hormone metabolism.auxin.induced-regulated-responsive-activated'	response to cold; LOCATED IN: plasma membrane; EXPRESSED IN: 21 plant structures; EXPRESSED DURING: 13 growth stages; CONTAINS InterPro DOMAIN/s: Auxin responsive SAUR protein (InterPro:IPR003676); BEST Arabidopsis thaliana protein match is: SAUR-like auxin-responsive protein family (TAIR:AT2G21210.1); Has 1324 Blast hits to 1312 proteins in 28 species: Archae - 0; Bacteria - 0; Metazoa - 0; Fung…
Medtr4g072480	'17.2.3'	'hormone metabolism.auxin.induced-regulated-responsive-activated'	response to cold; LOCATED IN: plasma membrane; EXPRESSED IN: 21 plant structures; EXPRESSED DURING: 13 growth stages; CONTAINS InterPro DOMAIN/s: Auxin responsive SAUR protein (InterPro:IPR003676); BEST Arabidopsis thaliana protein match is: SAUR-like auxin-responsive protein family (TAIR:AT2G21210.1); Has 1324 Blast hits to 1312 proteins in 28 species: Archae - 0; Bacteria - 0; Metazoa - 0; Fung…
Medtr4g072500	'17.2.3'	'hormone metabolism.auxin.induced-regulated-responsive-activated'	response to cold; LOCATED IN: plasma membrane; EXPRESSED IN: 21 plant structures; EXPRESSED DURING: 13 growth stages; CONTAINS InterPro DOMAIN/s: Auxin responsive SAUR protein (InterPro:IPR003676); BEST Arabidopsis thaliana protein match is: SAUR-like auxin-responsive protein family (TAIR:AT2G21210.1); Has 1324 Blast hits to 1312 proteins in 28 species: Archae - 0; Bacteria - 0; Metazoa - 0; Fung…
Medtr4g072600	'17.2.3'	'hormone metabolism.auxin.induced-regulated-responsive-activated'	response to cold; LOCATED IN: plasma membrane; EXPRESSED IN: 21 plant structures; EXPRESSED DURING: 13 growth stages; CONTAINS InterPro DOMAIN/s: Auxin responsive SAUR protein (InterPro:IPR003676); BEST Arabidopsis thaliana protein match is: SAUR-like auxin-responsive protein family (TAIR:AT2G21210.1); Has 1324 Blast hits to 1312 proteins in 28 species: Archae - 0; Bacteria - 0; Metazoa - 0; Fung…
Medtr4g072610	'17.2.3'	'hormone metabolism.auxin.induced-regulated-responsive-activated'	response to cold; LOCATED IN: plasma membrane; EXPRESSED IN: 21 plant structures; EXPRESSED DURING: 13 growth stages; CONTAINS InterPro DOMAIN/s: Auxin responsive SAUR protein (InterPro:IPR003676); BEST Arabidopsis thaliana protein match is: SAUR-like auxin-responsive protein family (TAIR:AT2G21210.1); Has 1324 Blast hits to 1312 proteins in 28 species: Archae - 0; Bacteria - 0; Metazoa - 0; Fung…
Medtr4g072660	'17.2.3'	'hormone metabolism.auxin.induced-regulated-responsive-activated'	response to cold; LOCATED IN: plasma membrane; EXPRESSED IN: 21 plant structures; EXPRESSED DURING: 13 growth stages; CONTAINS InterPro DOMAIN/s: Auxin responsive SAUR protein (InterPro:IPR003676); BEST Arabidopsis thaliana protein match is: SAUR-like auxin-responsive protein family (TAIR:AT2G21210.1); Has 1324 Blast hits to 1312 proteins in 28 species: Archae - 0; Bacteria - 0; Metazoa - 0; Fung…
Medtr4g072680	'17.2.3'	'hormone metabolism.auxin.induced-regulated-responsive-activated'	response to cold; LOCATED IN: plasma membrane; EXPRESSED IN: 21 plant structures; EXPRESSED DURING: 13 growth stages; CONTAINS InterPro DOMAIN/s: Auxin responsive SAUR protein (InterPro:IPR003676); BEST Arabidopsis thaliana protein match is: SAUR-like auxin-responsive protein family (TAIR:AT2G21210.1); Has 1324 Blast hits to 1312 proteins in 28 species: Archae - 0; Bacteria - 0; Metazoa - 0; Fung…
Medtr4g072730	'17.2.3'	'hormone metabolism.auxin.induced-regulated-responsive-activated'	response to cold; LOCATED IN: plasma membrane; EXPRESSED IN: 21 plant structures; EXPRESSED DURING: 13 growth stages; CONTAINS InterPro DOMAIN/s: Auxin responsive SAUR protein (InterPro:IPR003676); BEST Arabidopsis thaliana protein match is: SAUR-like auxin-responsive protein family (TAIR:AT2G21210.1); Has 1324 Blast hits to 1312 proteins in 28 species: Archae - 0; Bacteria - 0; Metazoa - 0; Fung…
Medtr4g072850	'17.2.3'	'hormone metabolism.auxin.induced-regulated-responsive-activated'	response to cold; LOCATED IN: plasma membrane; EXPRESSED IN: 21 plant structures; EXPRESSED DURING: 13 growth stages; CONTAINS InterPro DOMAIN/s: Auxin responsive SAUR protein (InterPro:IPR003676); BEST Arabidopsis thaliana protein match is: SAUR-like auxin-responsive protein family (TAIR:AT2G21210.1); Has 1324 Blast hits to 1312 proteins in 28 species: Archae - 0; Bacteria - 0; Metazoa - 0; Fung…
Medtr4g072870	'17.2.3'	'hormone metabolism.auxin.induced-regulated-responsive-activated'	response to cold; LOCATED IN: plasma membrane; EXPRESSED IN: 21 plant structures; EXPRESSED DURING: 13 growth stages; CONTAINS InterPro DOMAIN/s: Auxin responsive SAUR protein (InterPro:IPR003676); BEST Arabidopsis thaliana protein match is: SAUR-like auxin-responsive protein family (TAIR:AT2G21210.1); Has 1324 Blast hits to 1312 proteins in 28 species: Archae - 0; Bacteria - 0; Metazoa - 0; Fung…
Medtr4g072880	'17.2.3'	'hormone metabolism.auxin.induced-regulated-responsive-activated'	response to cold; LOCATED IN: plasma membrane; EXPRESSED IN: 21 plant structures; EXPRESSED DURING: 13 growth stages; CONTAINS InterPro DOMAIN/s: Auxin responsive SAUR protein (InterPro:IPR003676); BEST Arabidopsis thaliana protein match is: SAUR-like auxin-responsive protein family (TAIR:AT2G21210.1); Has 1324 Blast hits to 1312 proteins in 28 species: Archae - 0; Bacteria - 0; Metazoa - 0; Fung…
Medtr4g082310	'17.2.3'	'hormone metabolism.auxin.induced-regulated-responsive-activated'	T
Medtr4g133620	'17.2.3'	'hormone metabolism.auxin.induced-regulated-responsive-activated'	eukaryote (InterPro:IPR004877)
Medtr5g021820	'17.2.3'	'hormone metabolism.auxin.induced-regulated-responsive-activated'	T
Medtr5g032100	'17.2.3'	'hormone metabolism.auxin.induced-regulated-responsive-activated'	T
Medtr7g114990	'17.2.3'	'hormone metabolism.auxin.induced-regulated-responsive-activated'	Aldo/keto reductase subgroup (InterPro:IPR020471); BEST Arabidopsis thaliana protein match is: NAD(P)-linked oxidoreductase superfamily protein (TAIR:AT1G60730.1); Has 30719 Blast hits to 30695 proteins in 2595 species: Archae - 650; Bacteria - 20319; Metazoa - 1822; Fungi - 2308; Plants - 1286; Viruses - 0; Other Eukaryotes - 4334 (source: NCBI BLink). & (p40691|a115_tobac : 339.0) Auxin-induced…
Medtr7g117375	'17.2.3'	'hormone metabolism.auxin.induced-regulated-responsive-activated'	eukaryote (InterPro:IPR004877)
Medtr8g009880	'17.2.3'	'hormone metabolism.auxin.induced-regulated-responsive-activated'	eukaryote (InterPro:IPR004877)
Medtr8g022380	'17.2.3'	'hormone metabolism.auxin.induced-regulated-responsive-activated'	T
Medtr8g022440	'17.2.3'	'hormone metabolism.auxin.induced-regulated-responsive-activated'	T
Medtr8g027920	'17.2.3'	'hormone metabolism.auxin.induced-regulated-responsive-activated'	(e.g. the ability to synthesize adenosine 5'-tetraphosphate and other JA conjugates)
Medtr8g027955	'17.2.3'	'hormone metabolism.auxin.induced-regulated-responsive-activated'	(e.g. the ability to synthesize adenosine 5'-tetraphosphate and other JA conjugates)
Medtr5g020020	'17.3.1.1.2'	'hormone metabolism.brassinosteroid.synthesis-degradation.BRs.DWF4'	compressed rosette
Medtr6g015910	'17.3.1.1.4'	'hormone metabolism.brassinosteroid.synthesis-degradation.BRs.BR6OX'	a C-6 oxidation
Medtr3g103510	'17.3.1.2.99'	'hormone metabolism.brassinosteroid.synthesis-degradation.sterols.other'	based on sequence similarities
Medtr4g092640	'17.3.1.2.99'	'hormone metabolism.brassinosteroid.synthesis-degradation.sterols.other'	based on sequence similarities
Medtr3g041560	'17.3.2.1'	'hormone metabolism.brassinosteroid.signal transduction.BRI'	defense response to fungus
Medtr3g048740	'17.3.2.1'	'hormone metabolism.brassinosteroid.signal transduction.BRI'	defense response; LOCATED IN: chloroplast; EXPRESSED IN: 10 plant structures; EXPRESSED DURING: 10 growth stages; CONTAINS InterPro DOMAIN/s: Leucine-rich repeat
Medtr3g437630	'17.3.2.1'	'hormone metabolism.brassinosteroid.signal transduction.BRI'	protein kinase activity
Medtr3g449240	'17.3.2.1'	'hormone metabolism.brassinosteroid.signal transduction.BRI'	defense response to fungus
Medtr1g076470	'17.3.2.99'	'hormone metabolism.brassinosteroid.signal transduction.other'	T
Medtr2g008390	'17.3.2.99'	'hormone metabolism.brassinosteroid.signal transduction.other'	when BAK1 and BRI1 are coexpressed
Medtr0036s0220	'17.4.1'	'hormone metabolism.cytokinin.synthesis-degradation'	transferase activity
Medtr1g072540	'17.4.1'	'hormone metabolism.cytokinin.synthesis-degradation'	otherwise to the chloroplast.; isopentenyltransferase 3 (IPT3); CONTAINS InterPro DOMAIN/s: tRNA isopentenyltransferase (InterPro:IPR002627); BEST Arabidopsis thaliana protein match is: isopentenyltransferase 5 (TAIR:AT5G19040.1); Has 30201 Blast hits to 17322 proteins in 780 species: Archae - 12; Bacteria - 1396; Metazoa - 17338; Fungi - 3422; Plants - 5037; Viruses - 0; Other Eukaryotes - 2996 …
Medtr4g117330	'17.4.1'	'hormone metabolism.cytokinin.synthesis-degradation'	T
Medtr4g126150	'17.4.1'	'hormone metabolism.cytokinin.synthesis-degradation'	which catalyzes the degradation of cytokinins.; cytokinin oxidase 3 (CKX3); FUNCTIONS IN: primary amine oxidase activity
Medtr5g031840	'17.4.1'	'hormone metabolism.cytokinin.synthesis-degradation'	which has been classified as a bHLH protein (AtbHLH152). Subsequently it has been found that the AAF87154 protein appears to be encoded by the AT1G23970 genomic locus.; UDP-glucosyl transferase 85A3 (UGT85A3); FUNCTIONS IN: transferase activity
Medtr6g014020	'17.4.1'	'hormone metabolism.cytokinin.synthesis-degradation'	transferase activity
Medtr6g014187	'17.4.1'	'hormone metabolism.cytokinin.synthesis-degradation'	which has been classified as a bHLH protein (AtbHLH152). Subsequently it has been found that the AAF87154 protein appears to be encoded by the AT1G23970 genomic locus.; UDP-glucosyl transferase 85A3 (UGT85A3); FUNCTIONS IN: transferase activity
Medtr6g014220	'17.4.1'	'hormone metabolism.cytokinin.synthesis-degradation'	transferase activity
Medtr7g090920	'17.4.1'	'hormone metabolism.cytokinin.synthesis-degradation'	which catalyzes the degradation of cytokinins.; cytokinin oxidase/dehydrogenase 1 (CKX1); FUNCTIONS IN: cytokinin dehydrogenase activity; INVOLVED IN: N-terminal protein myristoylation
Medtr8g043470	'17.4.1'	'hormone metabolism.cytokinin.synthesis-degradation'	T
Medtr1g032140	'17.5.1'	'hormone metabolism.ethylene.synthesis-degradation'	the last step in ethylene biosynthesis) involved in ethylene synthesis and fruit ripening in tomato. This gene is not induced by ethylene in siliques. The transcript is found in siliques
Medtr7g079080	'17.5.1.1'	'hormone metabolism.ethylene.synthesis-degradation.1-aminocyclopropane-1-carboxylate synthase'	EC 4.4.1.14) gene family. The gene is transcriptionally active but enzymatically inactive. The predicted amino-acid sequence of ACS1 is missing the highly conserved tripeptide
Medtr8g098930	'17.5.1.1'	'hormone metabolism.ethylene.synthesis-degradation.1-aminocyclopropane-1-carboxylate synthase'	EC 4.4.1.14) gene family; 1-aminocyclopropane-1-carboxylic acid (acc) synthase 6 (ACS6); CONTAINS InterPro DOMAIN/s: 1-aminocyclopropane-1-carboxylate synthase (InterPro:IPR001176)
Medtr3g083370	'17.5.1.2'	'hormone metabolism.ethylene.synthesis-degradation.1-aminocyclopropane-1-carboxylate oxidase'	ethylene biosynthetic process; EXPRESSED IN: 22 plant structures; EXPRESSED DURING: 13 growth stages; CONTAINS InterPro DOMAIN/s: Oxoglutarate/iron-dependent oxygenase (InterPro:IPR005123); BEST Arabidopsis thaliana protein match is: 2-oxoglutarate (2OG) and Fe(II)-dependent oxygenase superfamily protein (TAIR:AT1G12010.1); Has 8587 Blast hits to 8552 proteins in 1009 species: Archae - 0; Bacteri…
Medtr5g085330	'17.5.1.2'	'hormone metabolism.ethylene.synthesis-degradation.1-aminocyclopropane-1-carboxylate oxidase'	ethylene biosynthetic process; EXPRESSED IN: 22 plant structures; EXPRESSED DURING: 13 growth stages; CONTAINS InterPro DOMAIN/s: Oxoglutarate/iron-dependent oxygenase (InterPro:IPR005123); BEST Arabidopsis thaliana protein match is: 2-oxoglutarate (2OG) and Fe(II)-dependent oxygenase superfamily protein (TAIR:AT1G12010.1); Has 8587 Blast hits to 8552 proteins in 1009 species: Archae - 0; Bacteri…
Medtr1g043350	'17.5.2'	'hormone metabolism.ethylene.signal transduction'	ATERF-2
Medtr1g074370	'17.5.2'	'hormone metabolism.ethylene.signal transduction'	ATERF-2
Medtr2g014300	'17.5.2'	'hormone metabolism.ethylene.signal transduction'	ATERF-4
Medtr3g079390	'17.5.2'	'hormone metabolism.ethylene.signal transduction'	plant & (at4g31980 : 218.0) unknown protein; CONTAINS InterPro DOMAIN/s: Protein of unknown function DUF247
Medtr3g107380	'17.5.2'	'hormone metabolism.ethylene.signal transduction'	sequence-specific DNA binding transcription factor activity; INVOLVED IN: regulation of transcription
Medtr8g006815	'17.5.2'	'hormone metabolism.ethylene.signal transduction'	ATERF-2
Medtr7g077670	'17.6.1'	'hormone metabolism.gibberelin.synthesis-degradation'	T
Medtr7g011663	'17.6.1.1'	'hormone metabolism.gibberelin.synthesis-degradation.copalyl diphosphate synthase'	chloroplast precursor (EC 5.5.1.13) (Ent-copalyl diphosphate synthase) (KSA) - Pisum sativum (Garden pea) & (at4g02780 : 832.0) Catalyzes the conversion of geranylgeranyl pyrophosphate (GGPP) to copalyl pyrophosphate (CPP) of gibberellin biosynthesis; GA REQUIRING 1 (GA1); CONTAINS InterPro DOMAIN/s: Terpene synthase
Medtr3g096500	'17.6.1.11'	'hormone metabolism.gibberelin.synthesis-degradation.GA20 oxidase'	Oxoglutarate/iron-dependent oxygenase (InterPro:IPR005123); BEST Arabidopsis thaliana protein match is: 2-oxoglutarate (2OG) and Fe(II)-dependent oxygenase superfamily protein (TAIR:AT4G25420.1); Has 8534 Blast hits to 8499 proteins in 990 species: Archae - 0; Bacteria - 1114; Metazoa - 120; Fungi - 1000; Plants - 4903; Viruses - 0; Other Eukaryotes - 1397 (source: NCBI BLink). & (o04706|gao1b_wh…
Medtr6g464620	'17.6.1.11'	'hormone metabolism.gibberelin.synthesis-degradation.GA20 oxidase'	Oxoglutarate/iron-dependent oxygenase (InterPro:IPR005123); BEST Arabidopsis thaliana protein match is: gibberellin 20 oxidase 2 (TAIR:AT5G51810.1); Has 8544 Blast hits to 8501 proteins in 990 species: Archae - 0; Bacteria - 1084; Metazoa - 124; Fungi - 981; Plants - 4942; Viruses - 0; Other Eukaryotes - 1413 (source: NCBI BLink). & (o04705|gao1d_wheat : 490.0) Gibberellin 20 oxidase 1-D (EC 1.14…
Medtr1g086550	'17.6.1.13'	'hormone metabolism.gibberelin.synthesis-degradation.GA2 oxidase'	T
Medtr5g014240	'17.6.1.4'	'hormone metabolism.gibberelin.synthesis-degradation.ent-kaurenoic acid hydroxylase/oxygenase'	B-class (InterPro:IPR002397)
Medtr8g012970	'17.6.1.4'	'hormone metabolism.gibberelin.synthesis-degradation.ent-kaurenoic acid hydroxylase/oxygenase'	B-class (InterPro:IPR002397)
Medtr8g089800	'17.6.1.4'	'hormone metabolism.gibberelin.synthesis-degradation.ent-kaurenoic acid hydroxylase/oxygenase'	B-class (InterPro:IPR002397)
Medtr7g010580	'17.6.3'	'hormone metabolism.gibberelin.induced-regulated-responsive-activated'	gibberellic acid mediated signaling pathway; EXPRESSED IN: 23 plant structures; EXPRESSED DURING: 14 growth stages; CONTAINS InterPro DOMAIN/s: Gibberellin regulated protein (InterPro:IPR003854); BEST Arabidopsis thaliana protein match is: Gibberellin-regulated family protein (TAIR:AT1G74670.1); Has 474 Blast hits to 474 proteins in 44 species: Archae - 0; Bacteria - 0; Metazoa - 0; Fungi - 0; Pl…
Medtr7g090590	'17.6.3'	'hormone metabolism.gibberelin.induced-regulated-responsive-activated'	T
Medtr3g081130	'17.7.1.2'	'hormone metabolism.jasmonate.synthesis-degradation.lipoxygenase'	C-terminal & (p27480|loxa_phavu : 1135.0) Lipoxygenase 1 (EC 1.13.11.12) - Phaseolus vulgaris (Kidney bean) (French bean) & (gnl|cdd|84680 : 1018.0) no description available & (at1g55020 : 926.0) lipoxygenase
Medtr3g479460	'17.7.1.2'	'hormone metabolism.jasmonate.synthesis-degradation.lipoxygenase'	chloroplast precursor (EC 1.13.11.12) - Oryza sativa (Rice) & (at3g45140 : 926.0) Chloroplast lipoxygenase required for wound-induced jasmonic acid accumulation in Arabidopsis.Mutants are resistant to Staphylococcus aureus and accumulate salicylic acid upon infection.; lipoxygenase 2 (LOX2); FUNCTIONS IN: lipoxygenase activity; INVOLVED IN: in 7 processes; LOCATED IN: chloroplast thylakoid membra…
Medtr4g088810	'17.7.1.2'	'hormone metabolism.jasmonate.synthesis-degradation.lipoxygenase'	acting on single donors with incorporation of molecular oxygen
Medtr8g018450	'17.7.1.2'	'hormone metabolism.jasmonate.synthesis-degradation.lipoxygenase'	a defense gene conferring resistance Xanthomonas campestris; lipoxygenase 1 (LOX1); CONTAINS InterPro DOMAIN/s: Lipoxygenase
Medtr8g018690	'17.7.1.2'	'hormone metabolism.jasmonate.synthesis-degradation.lipoxygenase'	C-terminal & (p09918|lox3_pea : 1229.0) Seed lipoxygenase-3 (EC 1.13.11.12) - Pisum sativum (Garden pea) & (gnl|cdd|84680 : 1031.0) no description available & (at3g22400 : 923.0) LOX5; FUNCTIONS IN: oxidoreductase activity
Medtr8g018735	'17.7.1.2'	'hormone metabolism.jasmonate.synthesis-degradation.lipoxygenase'	a defense gene conferring resistance Xanthomonas campestris; lipoxygenase 1 (LOX1); CONTAINS InterPro DOMAIN/s: Lipoxygenase
Medtr1g034320	'17.7.1.3'	'hormone metabolism.jasmonate.synthesis-degradation.allene oxidase synthase'	the major one being a 13-AOS but also expressing a 9-AOS activity.; allene oxide synthase (AOS); FUNCTIONS IN: hydro-lyase activity
Medtr7g417750	'17.7.1.4'	'hormone metabolism.jasmonate.synthesis-degradation.allene oxidase cyclase'	which catalyzes an essential step in jasmonic acid biosynthesis. Gene expression is reduced during senescence
Medtr5g006710	'17.7.1.5'	'hormone metabolism.jasmonate.synthesis-degradation.12-Oxo-PDA-reductase'	it shows very little activity with the naturally occurring OPDA isomer. Shows activity towards 2
Medtr5g006750	'17.7.1.5'	'hormone metabolism.jasmonate.synthesis-degradation.12-Oxo-PDA-reductase'	it shows very little activity with the naturally occurring OPDA isomer. Shows activity towards 2
Medtr4g124960	'17.7.2'	'hormone metabolism.jasmonate.signal transduction'	presumably by stimulating ubiquitin-proteasome-mediated degradation. The Jas domain appears to be important for JAZ1-COI1 interactions in the presence of coronatine. Two positive residues (R205 and R206) in the Jas domain shown to be important for coronatine -dependent COI1 binding are not required for binding AtMYC2.; TIFY10A; CONTAINS InterPro DOMAIN/s: Tify (InterPro:IPR010399)
Medtr4g094805	'18'	'Co-factor and vitamine metabolism'	nicotinate nucleotide salvage; LOCATED IN: cellular_component unknown; EXPRESSED IN: 22 plant structures; EXPRESSED DURING: 13 growth stages; CONTAINS InterPro DOMAIN/s: Nicotinate phosphoribosyltransferase-related (InterPro:IPR007229)
Medtr2g009270	'18.3.1'	'Co-factor and vitamine metabolism.riboflavin.GTP cyclohydrolase II'	4-dihydroxy-2-butanone-4-phosphate synthase activity which makes it a bifunctional enzyme involved in the formation of the pyrimidine and of the carbohydrate from GTP and ribulose-5-phosphate
Medtr2g030240	'18.5.2.4'	'Co-factor and vitamine metabolism.folate & vitamine K.vitamine K.o-Succinyl-BenzoylCoa Synthetase'	conserved site (InterPro:IPR020845)
Medtr5g067410	'19.2'	'tetrapyrrole synthesis.glu-tRNA reductase'	chloroplast precursor (EC 1.2.1.70) (GluTR) - Cucumis sativus (Cucumber) & (at1g58290 : 701.0) Encodes a protein with glutamyl-tRNA reductase (GluTR) activity
Medtr4g067150	'19.40'	'tetrapyrrole synthesis.regulation'	genomes uncoupled
Medtr5g091340	'2.1.1.1'	'major CHO metabolism.synthesis.sucrose.SPS'	transferase activity
Medtr3g078570	'2.1.2.1'	'major CHO metabolism.synthesis.starch.AGPase'	nucleotidyltransferase activity; INVOLVED IN: response to cadmium ion
Medtr4g131760	'2.1.2.1'	'major CHO metabolism.synthesis.starch.AGPase'	rate limiting step in starch biosynthesis. The large subunit plays a regulatory role whereas the small subunit (ApS) is the catalytic isoform. Four isoforms (ApL1-4) have been identified. ApL1 is the major large subunit isoform present in leaves. Mutational analysis of APS1 suggests that APL1 and APL2 can compensate for loss of APS1 catalytic activity
Medtr5g030600	'2.1.2.2'	'major CHO metabolism.synthesis.starch.starch synthase'	catalytic domain (InterPro:IPR013534); BEST Arabidopsis thaliana protein match is: starch synthase 4 (TAIR:AT4G18240.1). & (gnl|cdd|80717 : 278.0) no description available & (q43846|ssy3_soltu : 190.0) Soluble starch synthase 3
Medtr1g057810	'2.2.1.1'	'major CHO metabolism.degradation.sucrose.fructokinase'	ribokinase activity; INVOLVED IN: response to cadmium ion; LOCATED IN: cellular_component unknown; EXPRESSED IN: 23 plant structures; EXPRESSED DURING: 13 growth stages; CONTAINS InterPro DOMAIN/s: Carbohydrate/purine kinase (InterPro:IPR011611)
Medtr4g123030	'2.2.1.3.1'	'major CHO metabolism.degradation.sucrose.invertases.neutral'	beta-fructofuranosidase activity; INVOLVED IN: biological_process unknown; EXPRESSED IN: 23 plant structures; EXPRESSED DURING: 13 growth stages; CONTAINS InterPro DOMAIN/s: Plant neutral invertase (InterPro:IPR006937)
Medtr7g111890	'2.2.1.3.1'	'major CHO metabolism.degradation.sucrose.invertases.neutral'	beta-fructofuranosidase activity; INVOLVED IN: biological_process unknown; EXPRESSED IN: 6 plant structures; EXPRESSED DURING: L mature pollen stage
Medtr1g015940	'2.2.1.3.2'	'major CHO metabolism.degradation.sucrose.invertases.cell wall'	family 32 (InterPro:IPR001362)
Medtr0419s0050	'2.2.1.5'	'major CHO metabolism.degradation.sucrose.Susy'	plant/cyanobacteria (InterPro:IPR012820)
Medtr2g044070	'2.2.1.5'	'major CHO metabolism.degradation.sucrose.Susy'	sucrose synthase activity
Medtr3g064610	'2.2.1.5'	'major CHO metabolism.degradation.sucrose.Susy'	plant/cyanobacteria (InterPro:IPR012820)
Medtr5g076830	'2.2.1.5'	'major CHO metabolism.degradation.sucrose.Susy'	plant/cyanobacteria (InterPro:IPR012820)
Medtr6g478000	'2.2.1.5'	'major CHO metabolism.degradation.sucrose.Susy'	plant/cyanobacteria (InterPro:IPR012820)
Medtr6g478030	'2.2.1.5'	'major CHO metabolism.degradation.sucrose.Susy'	plant/cyanobacteria (InterPro:IPR012820)
Medtr4g045667	'2.2.2.1.2'	'major CHO metabolism.degradation.starch.starch cleavage.beta amylase'	4-alpha-D-glucan maltohydrolase) - Medicago sativa (Alfalfa) & (at4g15210 : 749.0) cytosolic beta-amylase expressed in rosette leaves and inducible by sugar. RAM1 mutants have reduced beta amylase in leaves and stems.; ARABIDOPSIS THALIANA BETA-AMYLASE (ATBETA-AMY); FUNCTIONS IN: beta-amylase activity; INVOLVED IN: response to herbivore
Medtr6g093240	'2.2.2.3'	'major CHO metabolism.degradation.starch.glucan water dikinase'	water dikinase (PWD) which is required for normal degradation of leaf starch in Arabidopsis. NMR analysis of the mutants
Medtr4g088350	'2.2.2.6'	'major CHO metabolism.degradation.starch.transporter'	chloroplast precursor (cTPT) (p36) (E30) - Pisum sativum (Garden pea) & (at5g46110 : 432.0) mutant has Altered acclimation responses; Chloroplast Triose Phosphate Translocator; ACCLIMATION OF PHOTOSYNTHESIS TO ENVIRONMENT 2 (APE2); FUNCTIONS IN: antiporter activity; INVOLVED IN: transport; LOCATED IN: chloroplast
Medtr3g099500	'2.2.2.8'	'major CHO metabolism.degradation.starch.ISA3'	the chloroplastic &#945;-amylase AMY3 is upregulated.; isoamylase 3 (ISA3); FUNCTIONS IN: isoamylase activity
Medtr0003s0090	'20.1'	'stress.biotic'	putative; FUNCTIONS IN: transmembrane receptor activity
Medtr0006s0080	'20.1'	'stress.biotic'	nucleotide binding
Medtr0069s0040	'20.1'	'stress.biotic'	nucleotide binding
Medtr0087s0030	'20.1'	'stress.biotic'	defense response to fungus
Medtr0277s0010	'20.1'	'stress.biotic'	ATP binding; INVOLVED IN: signal transduction
Medtr0277s0020	'20.1'	'stress.biotic'	ATP binding; INVOLVED IN: signal transduction
Medtr0349s0020	'20.1'	'stress.biotic'	ATP binding; INVOLVED IN: signal transduction
Medtr0419s0040	'20.1'	'stress.biotic'	ATP binding; INVOLVED IN: signal transduction
Medtr1g021100	'20.1'	'stress.biotic'	defense response; LOCATED IN: apoplast; EXPRESSED IN: 22 plant structures; EXPRESSED DURING: 13 growth stages; CONTAINS InterPro DOMAIN/s: NB-ARC (InterPro:IPR002182)
Medtr1g025420	'20.1'	'stress.biotic'	conserved site (InterPro:IPR017949)
Medtr1g030840	'20.1'	'stress.biotic'	defense response; LOCATED IN: chloroplast; EXPRESSED IN: 17 plant structures; EXPRESSED DURING: 10 growth stages; CONTAINS InterPro DOMAIN/s: Bet v I allergen (InterPro:IPR000916); BEST Arabidopsis thaliana protein match is: MLP-like protein 28 (TAIR:AT1G70830.5); Has 440 Blast hits to 408 proteins in 49 species: Archae - 0; Bacteria - 0; Metazoa - 0; Fungi - 0; Plants - 440; Viruses - 0; Other E…
Medtr1g036750	'20.1'	'stress.biotic'	nucleotide binding
Medtr1g037010	'20.1'	'stress.biotic'	nucleotide binding
Medtr1g037250	'20.1'	'stress.biotic'	nucleotide binding
Medtr1g040175	'20.1'	'stress.biotic'	transferring acyl groups other than amino-acyl groups; INVOLVED IN: biological_process unknown; LOCATED IN: cellular_component unknown; EXPRESSED IN: 9 plant structures; EXPRESSED DURING: 4 anthesis
Medtr1g040195	'20.1'	'stress.biotic'	transferring acyl groups other than amino-acyl groups; INVOLVED IN: biological_process unknown; LOCATED IN: cellular_component unknown; EXPRESSED IN: 9 plant structures; EXPRESSED DURING: 4 anthesis
Medtr1g040215	'20.1'	'stress.biotic'	transferring acyl groups other than amino-acyl groups; INVOLVED IN: biological_process unknown; LOCATED IN: cellular_component unknown; EXPRESSED IN: 9 plant structures; EXPRESSED DURING: 4 anthesis
Medtr1g050402	'20.1'	'stress.biotic'	apoptosis; CONTAINS InterPro DOMAIN/s: NB-ARC (InterPro:IPR002182)
Medtr1g062630	'20.1'	'stress.biotic'	PR5-like receptor kinase; PR5-like receptor kinase (PR5K); FUNCTIONS IN: transmembrane receptor protein serine/threonine kinase activity
Medtr1g076400	'20.1'	'stress.biotic'	binding; INVOLVED IN: protein ubiquitination; LOCATED IN: plasma membrane; EXPRESSED IN: 23 plant structures; EXPRESSED DURING: 13 growth stages; CONTAINS InterPro DOMAIN/s: U box domain (InterPro:IPR003613)
Medtr1g081660	'20.1'	'stress.biotic'	transferring acyl groups other than amino-acyl groups; INVOLVED IN: biological_process unknown; LOCATED IN: cellular_component unknown; EXPRESSED IN: 9 plant structures; EXPRESSED DURING: 4 anthesis
Medtr1g090370	'20.1'	'stress.biotic'	et al. (1997).; TGACG motif-binding factor 4 (TGA4); CONTAINS InterPro DOMAIN/s: Basic-leucine zipper (bZIP) transcription factor (InterPro:IPR004827)
Medtr1g109630	'20.1'	'stress.biotic'	LP.04 four leaves visible
Medtr2g016590	'20.1'	'stress.biotic'	with more than 85% a.a. identity. It has a broad expression pattern and is involved in vascular strand development in the leaf
Medtr2g034680	'20.1'	'stress.biotic'	LP.10 ten leaves visible
Medtr2g037150	'20.1'	'stress.biotic'	nucleoside-triphosphatase activity
Medtr2g044830	'20.1'	'stress.biotic'	putative; FUNCTIONS IN: transmembrane receptor activity
Medtr2g078260	'20.1'	'stress.biotic'	defense response; LOCATED IN: endomembrane system; EXPRESSED IN: 7 plant structures; EXPRESSED DURING: 9 growth stages; CONTAINS InterPro DOMAIN/s: Leucine-rich repeat
Medtr2g086790	'20.1'	'stress.biotic'	group 2 (InterPro:IPR004864); BEST Arabidopsis thaliana protein match is: Late embryogenesis abundant (LEA) hydroxyproline-rich glycoprotein family (TAIR:AT5G22200.1); Has 838 Blast hits to 838 proteins in 28 species: Archae - 0; Bacteria - 0; Metazoa - 0; Fungi - 0; Plants - 838; Viruses - 0; Other Eukaryotes - 0 (source: NCBI BLink). & (gnl|cdd|70773 : 139.0) no description available & (reliabi…
Medtr3g015560	'20.1'	'stress.biotic'	defense response; LOCATED IN: endomembrane system; EXPRESSED IN: 23 plant structures; EXPRESSED DURING: 14 growth stages; CONTAINS InterPro DOMAIN/s: Leucine-rich repeat-containing protein (InterPro:IPR015766)
Medtr3g034030	'20.1'	'stress.biotic'	defense response; LOCATED IN: cell wall; EXPRESSED IN: 13 plant structures; EXPRESSED DURING: 9 growth stages; CONTAINS InterPro DOMAIN/s: Plant disease resistance response protein (InterPro:IPR004265); BEST Arabidopsis thaliana protein match is: Disease resistance-responsive (dirigent-like protein) family protein (TAIR:AT1G22900.1); Has 912 Blast hits to 910 proteins in 44 species: Archae - 0; B…
Medtr3g055830	'20.1'	'stress.biotic'	nucleotide binding; INVOLVED IN: defense response
Medtr3g058880	'20.1'	'stress.biotic'	putative; FUNCTIONS IN: transmembrane receptor activity
Medtr3g062020	'20.1'	'stress.biotic'	apoptosis
Medtr3g062090	'20.1'	'stress.biotic'	defense response
Medtr3g062220	'20.1'	'stress.biotic'	apoptosis; CONTAINS InterPro DOMAIN/s: NB-ARC (InterPro:IPR002182)
Medtr3g062990	'20.1'	'stress.biotic'	defense response
Medtr3g063010	'20.1'	'stress.biotic'	defense response
Medtr3g078633	'20.1'	'stress.biotic'	class 3 (InterPro:IPR002921); BEST Arabidopsis thaliana protein match is: alpha/beta-Hydrolases superfamily protein (TAIR:AT3G48080.1); Has 35333 Blast hits to 34131 proteins in 2444 species: Archae - 798; Bacteria - 22429; Metazoa - 974; Fungi - 991; Plants - 531; Viruses - 0; Other Eukaryotes - 9610 (source: NCBI BLink). & (gnl|cdd|85661 : 90.8) no description available & (reliability: 782.0) &…
Medtr3g079340	'20.1'	'stress.biotic'	class 3 (InterPro:IPR002921); BEST Arabidopsis thaliana protein match is: alpha/beta-Hydrolases superfamily protein (TAIR:AT3G48080.1); Has 35333 Blast hits to 34131 proteins in 2444 species: Archae - 798; Bacteria - 22429; Metazoa - 974; Fungi - 991; Plants - 531; Viruses - 0; Other Eukaryotes - 9610 (source: NCBI BLink). & (gnl|cdd|85661 : 84.6) no description available & (reliability: 808.0) &…
Medtr3g455910	'20.1'	'stress.biotic'	nucleotide binding; INVOLVED IN: defense response
Medtr3g464810	'20.1'	'stress.biotic'	nucleotide binding
Medtr4g013325	'20.1'	'stress.biotic'	lignan biosynthetic process
Medtr4g013335	'20.1'	'stress.biotic'	defense response; LOCATED IN: endomembrane system; EXPRESSED IN: 22 plant structures; EXPRESSED DURING: 13 growth stages; CONTAINS InterPro DOMAIN/s: Plant disease resistance response protein (InterPro:IPR004265); BEST Arabidopsis thaliana protein match is: Disease resistance-responsive (dirigent-like protein) family protein (TAIR:AT5G49040.1). & (gnl|cdd|66675 : 148.0) no description available &…
Medtr4g013345	'20.1'	'stress.biotic'	defense response; LOCATED IN: endomembrane system; EXPRESSED IN: 22 plant structures; EXPRESSED DURING: 13 growth stages; CONTAINS InterPro DOMAIN/s: Plant disease resistance response protein (InterPro:IPR004265); BEST Arabidopsis thaliana protein match is: Disease resistance-responsive (dirigent-like protein) family protein (TAIR:AT5G49040.1). & (gnl|cdd|66675 : 145.0) no description available &…
Medtr4g013350	'20.1'	'stress.biotic'	defense response; LOCATED IN: endomembrane system; EXPRESSED IN: 22 plant structures; EXPRESSED DURING: 13 growth stages; CONTAINS InterPro DOMAIN/s: Plant disease resistance response protein (InterPro:IPR004265); BEST Arabidopsis thaliana protein match is: Disease resistance-responsive (dirigent-like protein) family protein (TAIR:AT5G49040.1). & (gnl|cdd|66675 : 148.0) no description available &…
Medtr4g014120	'20.1'	'stress.biotic'	nucleoside-triphosphatase activity
Medtr4g014140	'20.1'	'stress.biotic'	nucleoside-triphosphatase activity
Medtr4g014280	'20.1'	'stress.biotic'	ATP binding; INVOLVED IN: signal transduction
Medtr4g016790	'20.1'	'stress.biotic'	typical subtype (InterPro:IPR003591)
Medtr4g016800	'20.1'	'stress.biotic'	type 2 (InterPro:IPR013210)
Medtr4g017720	'20.1'	'stress.biotic'	defense response; LOCATED IN: membrane; EXPRESSED IN: leaf; CONTAINS InterPro DOMAIN/s: Leucine-rich repeat-containing N-terminal domain
Medtr4g017730	'20.1'	'stress.biotic'	defense response; LOCATED IN: membrane; EXPRESSED IN: leaf; CONTAINS InterPro DOMAIN/s: Leucine-rich repeat-containing N-terminal domain
Medtr4g050910	'20.1'	'stress.biotic'	putative; FUNCTIONS IN: transmembrane receptor activity
Medtr4g051662	'20.1'	'stress.biotic'	ATP binding; INVOLVED IN: signal transduction
Medtr4g051698	'20.1'	'stress.biotic'	ATP binding; INVOLVED IN: signal transduction
Medtr4g051715	'20.1'	'stress.biotic'	ATP binding; INVOLVED IN: signal transduction
Medtr4g051738	'20.1'	'stress.biotic'	ATP binding; INVOLVED IN: signal transduction
Medtr4g051880	'20.1'	'stress.biotic'	group 2 (InterPro:IPR004864); BEST Arabidopsis thaliana protein match is: Late embryogenesis abundant (LEA) hydroxyproline-rich glycoprotein family (TAIR:AT5G22200.1); Has 838 Blast hits to 838 proteins in 28 species: Archae - 0; Bacteria - 0; Metazoa - 0; Fungi - 0; Plants - 838; Viruses - 0; Other Eukaryotes - 0 (source: NCBI BLink). & (gnl|cdd|70773 : 136.0) no description available & (reliabi…
Medtr4g071465	'20.1'	'stress.biotic'	drug transmembrane transporter activity; INVOLVED IN: drug transmembrane transport
Medtr4g081250	'20.1'	'stress.biotic'	putative; FUNCTIONS IN: transmembrane receptor activity
Medtr4g091380	'20.1'	'stress.biotic'	defense response; LOCATED IN: cellular_component unknown; CONTAINS InterPro DOMAIN/s: Leucine-rich repeat-containing protein (InterPro:IPR015766)
Medtr5g018210	'20.1'	'stress.biotic'	defense response; CONTAINS InterPro DOMAIN/s: NB-ARC (InterPro:IPR002182)
Medtr5g063740	'20.1'	'stress.biotic'	defense response; LOCATED IN: membrane; EXPRESSED IN: leaf; CONTAINS InterPro DOMAIN/s: Leucine-rich repeat-containing N-terminal domain
Medtr5g085400	'20.1'	'stress.biotic'	nucleotide binding
Medtr5g086530	'20.1'	'stress.biotic'	defense response; LOCATED IN: endomembrane system; EXPRESSED IN: stem
Medtr5g086550	'20.1'	'stress.biotic'	defense response; LOCATED IN: endomembrane system; EXPRESSED IN: stem
Medtr6g008140	'20.1'	'stress.biotic'	putative; FUNCTIONS IN: transmembrane receptor activity
Medtr6g009480	'20.1'	'stress.biotic'	pathogenesis-related (InterPro:IPR001938); BEST Arabidopsis thaliana protein match is: Pathogenesis-related thaumatin superfamily protein (TAIR:AT4G38660.1); Has 1558 Blast hits to 1540 proteins in 173 species: Archae - 0; Bacteria - 31; Metazoa - 56; Fungi - 80; Plants - 1384; Viruses - 0; Other Eukaryotes - 7 (source: NCBI BLink). & (gnl|cdd|47535 : 211.0) no description available & (p83335|tlp…
Medtr6g016790	'20.1'	'stress.biotic'	acting on glycosyl bonds
Medtr6g016800	'20.1'	'stress.biotic'	acting on glycosyl bonds
Medtr6g016810	'20.1'	'stress.biotic'	acting on glycosyl bonds
Medtr6g038820	'20.1'	'stress.biotic'	defense response to fungus
Medtr6g069560	'20.1'	'stress.biotic'	ATP binding; INVOLVED IN: signal transduction
Medtr6g074090	'20.1'	'stress.biotic'	putative; FUNCTIONS IN: transmembrane receptor activity
Medtr6g074660	'20.1'	'stress.biotic'	ATP binding; INVOLVED IN: signal transduction
Medtr6g074810	'20.1'	'stress.biotic'	putative; FUNCTIONS IN: transmembrane receptor activity
Medtr6g074875	'20.1'	'stress.biotic'	putative; FUNCTIONS IN: transmembrane receptor activity
Medtr6g463150	'20.1'	'stress.biotic'	nucleotide binding
Medtr6g472230	'20.1'	'stress.biotic'	ATP binding; INVOLVED IN: signal transduction
Medtr6g472300	'20.1'	'stress.biotic'	ATP binding; INVOLVED IN: signal transduction
Medtr7g009450	'20.1'	'stress.biotic'	defense response; LOCATED IN: membrane; EXPRESSED IN: leaf; CONTAINS InterPro DOMAIN/s: Leucine-rich repeat-containing N-terminal domain
Medtr7g009510	'20.1'	'stress.biotic'	defense response; LOCATED IN: membrane; EXPRESSED IN: leaf; CONTAINS InterPro DOMAIN/s: Leucine-rich repeat-containing N-terminal domain
Medtr7g009540	'20.1'	'stress.biotic'	defense response; LOCATED IN: membrane; EXPRESSED IN: leaf; CONTAINS InterPro DOMAIN/s: Leucine-rich repeat-containing N-terminal domain
Medtr7g009570	'20.1'	'stress.biotic'	defense response; LOCATED IN: membrane; EXPRESSED IN: leaf; CONTAINS InterPro DOMAIN/s: Leucine-rich repeat-containing N-terminal domain
Medtr7g013170	'20.1'	'stress.biotic'	acting on glycosyl bonds
Medtr7g015770	'20.1'	'stress.biotic'	defense response; LOCATED IN: cellular_component unknown; EXPRESSED IN: shoot; CONTAINS InterPro DOMAIN/s: NB-ARC (InterPro:IPR002182)
Medtr7g070390	'20.1'	'stress.biotic'	lignan biosynthetic process
Medtr7g078640	'20.1'	'stress.biotic'	defense response; LOCATED IN: endomembrane system; EXPRESSED IN: 23 plant structures; EXPRESSED DURING: 14 growth stages; CONTAINS InterPro DOMAIN/s: Leucine-rich repeat-containing protein (InterPro:IPR015766)
Medtr7g093820	'20.1'	'stress.biotic'	T
Medtr7g093850	'20.1'	'stress.biotic'	T
Medtr7g106050	'20.1'	'stress.biotic'	group 2 (InterPro:IPR004864); BEST Arabidopsis thaliana protein match is: Late embryogenesis abundant (LEA) hydroxyproline-rich glycoprotein family (TAIR:AT3G52470.1); Has 917 Blast hits to 917 proteins in 27 species: Archae - 0; Bacteria - 0; Metazoa - 0; Fungi - 0; Plants - 917; Viruses - 0; Other Eukaryotes - 0 (source: NCBI BLink). & (gnl|cdd|70773 : 135.0) no description available & (reliabi…
Medtr7g114470	'20.1'	'stress.biotic'	transferring acyl groups other than amino-acyl groups; INVOLVED IN: biological_process unknown; LOCATED IN: cellular_component unknown; EXPRESSED IN: 9 plant structures; EXPRESSED DURING: 4 anthesis
Medtr7g117890	'20.1'	'stress.biotic'	binding; INVOLVED IN: protein ubiquitination; LOCATED IN: plasma membrane; EXPRESSED IN: 23 plant structures; EXPRESSED DURING: 13 growth stages; CONTAINS InterPro DOMAIN/s: U box domain (InterPro:IPR003613)
Medtr8g012960	'20.1'	'stress.biotic'	which is 'guarded' by R protein complex (RPM1 and RPS2 proteins). RIN4 physically interacts with RPS2 and RPM1 in vivo. Bacterial avirulence (Avr) effectors AvrB
Medtr8g016650	'20.1'	'stress.biotic'	putative; FUNCTIONS IN: transmembrane receptor activity
Medtr8g018750	'20.1'	'stress.biotic'	ATP binding; INVOLVED IN: signal transduction
Medtr8g020300	'20.1'	'stress.biotic'	nucleoside-triphosphatase activity
Medtr8g032420	'20.1'	'stress.biotic'	putative; FUNCTIONS IN: transmembrane receptor activity
Medtr8g038815	'20.1'	'stress.biotic'	putative; FUNCTIONS IN: transmembrane receptor activity
Medtr8g039950	'20.1'	'stress.biotic'	transferring acyl groups other than amino-acyl groups; INVOLVED IN: biological_process unknown; LOCATED IN: cellular_component unknown; EXPRESSED IN: 9 plant structures; EXPRESSED DURING: 4 anthesis
Medtr8g042660	'20.1'	'stress.biotic'	ATP binding; INVOLVED IN: signal transduction
Medtr8g045300	'20.1'	'stress.biotic'	defense response; LOCATED IN: cellular_component unknown; EXPRESSED IN: 22 plant structures; EXPRESSED DURING: 14 growth stages; CONTAINS InterPro DOMAIN/s: Bet v I allergen (InterPro:IPR000916); BEST Arabidopsis thaliana protein match is: MLP-like protein 34 (TAIR:AT1G70850.3); Has 30201 Blast hits to 17322 proteins in 780 species: Archae - 12; Bacteria - 1396; Metazoa - 17338; Fungi - 3422; Pla…
Medtr8g045665	'20.1'	'stress.biotic'	defense response; LOCATED IN: cellular_component unknown; EXPRESSED IN: 8 plant structures; EXPRESSED DURING: 6 growth stages; CONTAINS InterPro DOMAIN/s: Bet v I allergen (InterPro:IPR000916); BEST Arabidopsis thaliana protein match is: Polyketide cyclase/dehydrase and lipid transport superfamily protein (TAIR:AT5G28000.1); Has 1807 Blast hits to 1807 proteins in 277 species: Archae - 0; Bacteri…
Medtr8g045695	'20.1'	'stress.biotic'	defense response; LOCATED IN: cellular_component unknown; EXPRESSED IN: 8 plant structures; EXPRESSED DURING: 6 growth stages; CONTAINS InterPro DOMAIN/s: Bet v I allergen (InterPro:IPR000916); BEST Arabidopsis thaliana protein match is: Polyketide cyclase/dehydrase and lipid transport superfamily protein (TAIR:AT5G28000.1); Has 1807 Blast hits to 1807 proteins in 277 species: Archae - 0; Bacteri…
Medtr8g045735	'20.1'	'stress.biotic'	defense response; LOCATED IN: cellular_component unknown; EXPRESSED IN: 8 plant structures; EXPRESSED DURING: 6 growth stages; CONTAINS InterPro DOMAIN/s: Bet v I allergen (InterPro:IPR000916); BEST Arabidopsis thaliana protein match is: Polyketide cyclase/dehydrase and lipid transport superfamily protein (TAIR:AT5G28000.1); Has 1807 Blast hits to 1807 proteins in 277 species: Archae - 0; Bacteri…
Medtr8g074330	'20.1'	'stress.biotic'	defense response to fungus
Medtr8g074350	'20.1'	'stress.biotic'	defense response to fungus
Medtr8g079380	'20.1'	'stress.biotic'	apoptosis; LOCATED IN: endomembrane system; CONTAINS InterPro DOMAIN/s: NB-ARC (InterPro:IPR002182)
Medtr8g079450	'20.1'	'stress.biotic'	defense response; CONTAINS InterPro DOMAIN/s: NB-ARC (InterPro:IPR002182)
Medtr8g099030	'20.1.1'	'stress.biotic.respiratory burst'	integral to plasma membrane; EXPRESSED IN: 22 plant structures; EXPRESSED DURING: 13 growth stages; CONTAINS InterPro DOMAIN/s: Ferredoxin reductase-type FAD-binding domain (InterPro:IPR017927)
Medtr5g092210	'20.1.2'	'stress.biotic.receptors'	putative; FUNCTIONS IN: transmembrane receptor activity
Medtr6g074855	'20.1.2'	'stress.biotic.receptors'	nucleoside-triphosphatase activity
Medtr6g478010	'20.1.2'	'stress.biotic.receptors'	ATP binding; INVOLVED IN: signal transduction
Medtr8g062140	'20.1.2'	'stress.biotic.receptors'	ATP binding; INVOLVED IN: signal transduction
Medtr2g079500	'20.1.3.1'	'stress.biotic.signalling.MLO-like'	homologs of the barley mildew resistance locus o (MLO) protein. The Arabidopsis genome contains 15 genes encoding MLO proteins
Medtr8g073130	'20.1.3.1'	'stress.biotic.signalling.MLO-like'	homologs of the barley mildew resistance locus o (MLO) protein. The Arabidopsis genome contains 15 genes encoding MLO proteins
Medtr0006s0230	'20.1.7'	'stress.biotic.PR-proteins'	nucleotide binding
Medtr0087s0040	'20.1.7'	'stress.biotic.PR-proteins'	defense response to fungus
Medtr1g099240	'20.1.7'	'stress.biotic.PR-proteins'	defense response to fungus
Medtr1g115225	'20.1.7'	'stress.biotic.PR-proteins'	defense response; LOCATED IN: cell wall; EXPRESSED IN: 17 plant structures; EXPRESSED DURING: 10 growth stages; CONTAINS InterPro DOMAIN/s: Leucine-rich repeat-containing N-terminal domain
Medtr2g037140	'20.1.7'	'stress.biotic.PR-proteins'	putative; FUNCTIONS IN: transmembrane receptor activity
Medtr2g037690	'20.1.7'	'stress.biotic.PR-proteins'	putative; FUNCTIONS IN: transmembrane receptor activity
Medtr2g039090	'20.1.7'	'stress.biotic.PR-proteins'	defense response; LOCATED IN: endomembrane system; EXPRESSED IN: 23 plant structures; EXPRESSED DURING: 14 growth stages; CONTAINS InterPro DOMAIN/s: Leucine-rich repeat-containing protein (InterPro:IPR015766)
Medtr2g079900	'20.1.7'	'stress.biotic.PR-proteins'	defense response
Medtr3g022400	'20.1.7'	'stress.biotic.PR-proteins'	defense response; LOCATED IN: endomembrane system; EXPRESSED IN: 23 plant structures; EXPRESSED DURING: 14 growth stages; CONTAINS InterPro DOMAIN/s: Leucine-rich repeat-containing protein (InterPro:IPR015766)
Medtr3g022930	'20.1.7'	'stress.biotic.PR-proteins'	ATP binding; INVOLVED IN: signal transduction
Medtr3g030980	'20.1.7'	'stress.biotic.PR-proteins'	defense response; LOCATED IN: endomembrane system; EXPRESSED IN: 23 plant structures; EXPRESSED DURING: 14 growth stages; CONTAINS InterPro DOMAIN/s: Leucine-rich repeat-containing protein (InterPro:IPR015766)
Medtr3g033240	'20.1.7'	'stress.biotic.PR-proteins'	defense response; LOCATED IN: endomembrane system; EXPRESSED IN: 23 plant structures; EXPRESSED DURING: 14 growth stages; CONTAINS InterPro DOMAIN/s: Leucine-rich repeat-containing protein (InterPro:IPR015766)
Medtr3g048910	'20.1.7'	'stress.biotic.PR-proteins'	defense response to fungus
Medtr3g082130	'20.1.7'	'stress.biotic.PR-proteins'	defense response to fungus
Medtr4g018970	'20.1.7'	'stress.biotic.PR-proteins'	defense response to fungus
Medtr4g023400	'20.1.7'	'stress.biotic.PR-proteins'	ATP binding; INVOLVED IN: signal transduction
Medtr4g051682	'20.1.7'	'stress.biotic.PR-proteins'	putative; FUNCTIONS IN: transmembrane receptor activity
Medtr4g051688	'20.1.7'	'stress.biotic.PR-proteins'	putative; FUNCTIONS IN: transmembrane receptor activity
Medtr4g062470	'20.1.7'	'stress.biotic.PR-proteins'	E expanded cotyledon stage
Medtr5g018910	'20.1.7'	'stress.biotic.PR-proteins'	defense response; CONTAINS InterPro DOMAIN/s: NB-ARC (InterPro:IPR002182)
Medtr5g069580	'20.1.7'	'stress.biotic.PR-proteins'	typical subtype (InterPro:IPR003591)
Medtr5g086570	'20.1.7'	'stress.biotic.PR-proteins'	defense response; LOCATED IN: endomembrane system; EXPRESSED IN: stem
Medtr5g086690	'20.1.7'	'stress.biotic.PR-proteins'	ATP binding; INVOLVED IN: signal transduction
Medtr5g092990	'20.1.7'	'stress.biotic.PR-proteins'	putative; FUNCTIONS IN: transmembrane receptor activity
Medtr6g015730	'20.1.7'	'stress.biotic.PR-proteins'	ATP binding; INVOLVED IN: signal transduction
Medtr6g015750	'20.1.7'	'stress.biotic.PR-proteins'	ATP binding; INVOLVED IN: signal transduction
Medtr6g015775	'20.1.7'	'stress.biotic.PR-proteins'	ATP binding; INVOLVED IN: signal transduction
Medtr6g023340	'20.1.7'	'stress.biotic.PR-proteins'	hydrolase activity
Medtr6g036500	'20.1.7'	'stress.biotic.PR-proteins'	putative; FUNCTIONS IN: transmembrane receptor activity
Medtr6g038790	'20.1.7'	'stress.biotic.PR-proteins'	defense response to fungus
Medtr6g038940	'20.1.7'	'stress.biotic.PR-proteins'	defense response to fungus
Medtr6g039180	'20.1.7'	'stress.biotic.PR-proteins'	defense response to fungus
Medtr6g071925	'20.1.7'	'stress.biotic.PR-proteins'	putative; FUNCTIONS IN: transmembrane receptor activity
Medtr6g072290	'20.1.7'	'stress.biotic.PR-proteins'	putative; FUNCTIONS IN: transmembrane receptor activity
Medtr6g072780	'20.1.7'	'stress.biotic.PR-proteins'	putative; FUNCTIONS IN: transmembrane receptor activity
Medtr6g074620	'20.1.7'	'stress.biotic.PR-proteins'	putative; FUNCTIONS IN: transmembrane receptor activity
Medtr7g014430	'20.1.7'	'stress.biotic.PR-proteins'	defense response to fungus
Medtr7g100230	'20.1.7'	'stress.biotic.PR-proteins'	T
Medtr7g116850	'20.1.7'	'stress.biotic.PR-proteins'	hydrolase activity
Medtr8g018280	'20.1.7'	'stress.biotic.PR-proteins'	ATP binding; INVOLVED IN: signal transduction
Medtr8g079520	'20.1.7'	'stress.biotic.PR-proteins'	defense response; CONTAINS InterPro DOMAIN/s: NB-ARC (InterPro:IPR002182)
Medtr8g088970	'20.1.7'	'stress.biotic.PR-proteins'	defense response to fungus
Medtr8g089000	'20.1.7'	'stress.biotic.PR-proteins'	defense response to fungus
Medtr8g099115	'20.1.7'	'stress.biotic.PR-proteins'	defense response; LOCATED IN: endomembrane system; EXPRESSED IN: 21 plant structures; EXPRESSED DURING: 13 growth stages; CONTAINS InterPro DOMAIN/s: Plant disease resistance response protein (InterPro:IPR004265); BEST Arabidopsis thaliana protein match is: Disease resistance-responsive (dirigent-like protein) family protein (TAIR:AT1G64160.1); Has 772 Blast hits to 771 proteins in 42 species: Ar…
Medtr8g470380	'20.1.7'	'stress.biotic.PR-proteins'	with more than 85% a.a. identity. It has a broad expression pattern and is involved in vascular strand development in the leaf
Medtr5g090770	'20.1.7.10'	'stress.biotic.PR-proteins.NPR'	TGA3
Medtr6g078070	'20.1.7.6.1'	'stress.biotic.PR-proteins.proteinase inhibitors.trypsin inhibitor'	cell wall; EXPRESSED IN: 17 plant structures; EXPRESSED DURING: 13 growth stages; CONTAINS InterPro DOMAIN/s: Proteinase inhibitor I3
Medtr6g078100	'20.1.7.6.1'	'stress.biotic.PR-proteins.proteinase inhibitors.trypsin inhibitor'	cell wall; EXPRESSED IN: 17 plant structures; EXPRESSED DURING: 13 growth stages; CONTAINS InterPro DOMAIN/s: Proteinase inhibitor I3
Medtr0086s0010	'20.2'	'stress.abiotic'	plant homologs of mammalian regulators of apoptosis. Plant BAG proteins are multi-functional and remarkably similar to their animal counterparts
Medtr2g018860	'20.2'	'stress.abiotic'	plant homologs of mammalian regulators of apoptosis. Plant BAG proteins are multi-functional and remarkably similar to their animal counterparts
Medtr3g087950	'20.2'	'stress.abiotic'	EC 2.3.2.2) that is located in vascular tissues (predominantly phloem) of leaves and is involved in the degradation of glutathione. The encoded enzyme also mitigates oxidative stress by metabolizing GSSG (oxidized form of GSH - glutathione) in the apoplast.; gamma-glutamyl transpeptidase 1 (GGT1); FUNCTIONS IN: gamma-glutamyltransferase activity
Medtr4g063630	'20.2'	'stress.abiotic'	pathogenesis-related (InterPro:IPR001938); BEST Arabidopsis thaliana protein match is: Pathogenesis-related thaumatin superfamily protein (TAIR:AT1G75800.1); Has 1542 Blast hits to 1521 proteins in 166 species: Archae - 0; Bacteria - 19; Metazoa - 54; Fungi - 86; Plants - 1377; Viruses - 0; Other Eukaryotes - 6 (source: NCBI BLink). & (gnl|cdd|47535 : 254.0) no description available & (q9fsg7|tp1…
Medtr4g102740	'20.2'	'stress.abiotic'	plant homologs of mammalian regulators of apoptosis. Plant BAG proteins are multi-functional and remarkably similar to their animal counterparts
Medtr6g007770	'20.2'	'stress.abiotic'	Haem peroxidase
Medtr8g096900	'20.2'	'stress.abiotic'	incompatible interaction
Medtr8g096920	'20.2'	'stress.abiotic'	incompatible interaction
Medtr0036s0250	'20.2.1'	'stress.abiotic.heat'	mitochondrial precursor - Pisum sativum (Garden pea) & (at4g25200 : 85.5) AtHSP23.6-mito mRNA
Medtr1g015165	'20.2.1'	'stress.abiotic.heat'	HSP20-like chaperone (InterPro:IPR008978); BEST Arabidopsis thaliana protein match is: heat shock protein 17.6A (TAIR:AT5G12030.1); Has 1807 Blast hits to 1807 proteins in 277 species: Archae - 0; Bacteria - 0; Metazoa - 736; Fungi - 347; Plants - 385; Viruses - 0; Other Eukaryotes - 339 (source: NCBI BLink). & (gnl|cdd|84439 : 123.0) no description available & (gnl|cdd|35929 : 121.0) no descript…
Medtr1g022415	'20.2.1'	'stress.abiotic.heat'	N-terminal (InterPro:IPR001623); BEST Arabidopsis thaliana protein match is: Chaperone DnaJ-domain superfamily protein (TAIR:AT4G12770.2); Has 187564 Blast hits to 104912 proteins in 3501 species: Archae - 1251; Bacteria - 31029; Metazoa - 79517; Fungi - 15919; Plants - 9547; Viruses - 688; Other Eukaryotes - 49613 (source: NCBI BLink). & (gnl|cdd|35652 : 161.0) no description available & (reliab…
Medtr1g029470	'20.2.1'	'stress.abiotic.heat'	heat shock protein binding; INVOLVED IN: protein folding; LOCATED IN: cellular_component unknown; EXPRESSED IN: 22 plant structures; EXPRESSED DURING: 12 growth stages; CONTAINS InterPro DOMAIN/s: Molecular chaperone
Medtr1g087270	'20.2.1'	'stress.abiotic.heat'	heat shock protein binding; INVOLVED IN: protein folding; LOCATED IN: cellular_component unknown; EXPRESSED IN: leaf; CONTAINS InterPro DOMAIN/s: Tetratricopeptide-like helical (InterPro:IPR011990)
Medtr4g088475	'20.2.1'	'stress.abiotic.heat'	HSP20-like chaperone (InterPro:IPR008978); BEST Arabidopsis thaliana protein match is: heat shock protein 17.4 (TAIR:AT3G46230.1); Has 7090 Blast hits to 7089 proteins in 1610 species: Archae - 175; Bacteria - 4287; Metazoa - 66; Fungi - 302; Plants - 1606; Viruses - 0; Other Eukaryotes - 654 (source: NCBI BLink). & (gnl|cdd|84439 : 108.0) no description available & (gnl|cdd|35929 : 97.9) no desc…
Medtr4g088515	'20.2.1'	'stress.abiotic.heat'	response to cold
Medtr4g088900	'20.2.1'	'stress.abiotic.heat'	interacts with HSP70
Medtr5g017470	'20.2.1'	'stress.abiotic.heat'	overexpression of this gene did not result in the increase of decrease of heat shock proteins.; heat shock factor 4 (HSF4); FUNCTIONS IN: transcription repressor activity
Medtr5g087480	'20.2.1'	'stress.abiotic.heat'	HSP20-like chaperone (InterPro:IPR008978); BEST Arabidopsis thaliana protein match is: HSP20-like chaperones superfamily protein (TAIR:AT5G20970.1); Has 712 Blast hits to 708 proteins in 96 species: Archae - 0; Bacteria - 37; Metazoa - 7; Fungi - 2; Plants - 649; Viruses - 0; Other Eukaryotes - 17 (source: NCBI BLink). & (reliability: 171.0) & (original description: no original description)'
Medtr6g033800	'20.2.1'	'stress.abiotic.heat'	response to cold
Medtr6g033805	'20.2.1'	'stress.abiotic.heat'	mitochondrion
Medtr6g033855	'20.2.1'	'stress.abiotic.heat'	response to cold
Medtr6g033870	'20.2.1'	'stress.abiotic.heat'	mitochondrion
Medtr6g061940	'20.2.1'	'stress.abiotic.heat'	HSP20-like chaperone (InterPro:IPR008978); BEST Arabidopsis thaliana protein match is: HSP20-like chaperones superfamily protein (TAIR:AT1G53540.1); Has 1807 Blast hits to 1807 proteins in 277 species: Archae - 0; Bacteria - 0; Metazoa - 736; Fungi - 347; Plants - 385; Viruses - 0; Other Eukaryotes - 339 (source: NCBI BLink). & (gnl|cdd|84439 : 120.0) no description available & (gnl|cdd|35929 : 1…
Medtr7g024390	'20.2.1'	'stress.abiotic.heat'	response to cold
Medtr7g109340	'20.2.1'	'stress.abiotic.heat'	heat shock protein binding; INVOLVED IN: protein folding
Medtr7g109360	'20.2.1'	'stress.abiotic.heat'	heat shock protein binding; INVOLVED IN: protein folding; LOCATED IN: cellular_component unknown; EXPRESSED IN: 22 plant structures; EXPRESSED DURING: 13 growth stages; CONTAINS InterPro DOMAIN/s: Tetratricopeptide TPR-1 (InterPro:IPR001440)
Medtr8g075780	'20.2.1'	'stress.abiotic.heat'	response to stress; LOCATED IN: nucleus; EXPRESSED IN: 24 plant structures; EXPRESSED DURING: 14 growth stages; CONTAINS InterPro DOMAIN/s: Molecular chaperone
Medtr2g088770	'20.2.2'	'stress.abiotic.cold'	heme binding; INVOLVED IN: response to oxidative stress
Medtr3g070900	'20.2.2'	'stress.abiotic.cold'	two of which (TBR/AT5G06700 and TBL3/AT5G01360) have been shown to be involved in the synthesis and deposition of secondary wall cellulose
Medtr1g008500	'20.2.3'	'stress.abiotic.drought/salt'	response to salt stress
Medtr1g442840	'20.2.3'	'stress.abiotic.drought/salt'	plasma membrane
Medtr3g023110	'20.2.3'	'stress.abiotic.drought/salt'	light stress and treatment with plant-growth-promoting rhizobacteria (Paenibacillus polymyxa)
Medtr3g088790	'20.2.3'	'stress.abiotic.drought/salt'	methyltransferase putative (InterPro:IPR004159); BEST Arabidopsis thaliana protein match is: S-adenosyl-L-methionine-dependent methyltransferases superfamily protein (TAIR:AT1G29470.2); Has 79879 Blast hits to 39720 proteins in 2025 species: Archae - 377; Bacteria - 14382; Metazoa - 24757; Fungi - 8186; Plants - 4300; Viruses - 653; Other Eukaryotes - 27224 (source: NCBI BLink). & (gnl|cdd|66793 …
Medtr5g026930	'20.2.3'	'stress.abiotic.drought/salt'	methyltransferase putative (InterPro:IPR004159); BEST Arabidopsis thaliana protein match is: S-adenosyl-L-methionine-dependent methyltransferases superfamily protein (TAIR:AT1G31850.2); Has 1146 Blast hits to 1130 proteins in 105 species: Archae - 6; Bacteria - 157; Metazoa - 0; Fungi - 3; Plants - 960; Viruses - 0; Other Eukaryotes - 20 (source: NCBI BLink). & (gnl|cdd|66793 : 724.0) no descript…
Medtr8g100075	'20.2.3'	'stress.abiotic.drought/salt'	methyltransferase putative (InterPro:IPR004159); BEST Arabidopsis thaliana protein match is: S-adenosyl-L-methionine-dependent methyltransferases superfamily protein (TAIR:AT4G10440.1); Has 1106 Blast hits to 1098 proteins in 101 species: Archae - 5; Bacteria - 135; Metazoa - 1; Fungi - 2; Plants - 950; Viruses - 0; Other Eukaryotes - 13 (source: NCBI BLink). & (gnl|cdd|66793 : 774.0) no descript…
Medtr1g031640	'20.2.99'	'stress.abiotic.unspecified'	defense response; LOCATED IN: cellular_component unknown; EXPRESSED IN: 9 plant structures; EXPRESSED DURING: LP.04 four leaves visible
Medtr1g060120	'20.2.99'	'stress.abiotic.unspecified'	nutrient reservoir activity; INVOLVED IN: biological_process unknown; LOCATED IN: endomembrane system
Medtr1g112200	'20.2.99'	'stress.abiotic.unspecified'	nutrient reservoir activity; INVOLVED IN: biological_process unknown; LOCATED IN: endomembrane system
Medtr2g041550	'20.2.99'	'stress.abiotic.unspecified'	suggesting some kind of circadian regulation.; germin 3 (GER3); INVOLVED IN: response to cold
Medtr2g055760	'20.2.99'	'stress.abiotic.unspecified'	Rossmann-like alpha/beta/alpha sandwich fold (InterPro:IPR014729); BEST Arabidopsis thaliana protein match is: Adenine nucleotide alpha hydrolases-like superfamily protein (TAIR:AT2G03720.1); Has 185 Blast hits to 185 proteins in 20 species: Archae - 0; Bacteria - 0; Metazoa - 0; Fungi - 0; Plants - 185; Viruses - 0; Other Eukaryotes - 0 (source: NCBI BLink). & (reliability: 372.0) & (original de…
Medtr4g010340	'20.2.99'	'stress.abiotic.unspecified'	RmlC-type (InterPro:IPR011051)
Medtr4g088735	'20.2.99'	'stress.abiotic.unspecified'	petal differentiation and expansion stage; CONTAINS InterPro DOMAIN/s: Pollen Ole e 1 allergen/extensin (InterPro:IPR006041); BEST Arabidopsis thaliana protein match is: arabinogalactan protein 31 (TAIR:AT1G28290.1); Has 194 Blast hits to 194 proteins in 25 species: Archae - 0; Bacteria - 0; Metazoa - 0; Fungi - 0; Plants - 194; Viruses - 0; Other Eukaryotes - 0 (source: NCBI BLink). & (gnl|cdd|8…
Medtr5g035010	'20.2.99'	'stress.abiotic.unspecified'	defense response; EXPRESSED IN: 22 plant structures; EXPRESSED DURING: 14 growth stages; CONTAINS InterPro DOMAIN/s: Bet v I allergen (InterPro:IPR000916); BEST Arabidopsis thaliana protein match is: MLP-like protein 28 (TAIR:AT1G70830.3). & (gnl|cdd|84754 : 121.0) no description available & (reliability: 328.0) & (original description: no original description)'
Medtr5g036570	'20.2.99'	'stress.abiotic.unspecified'	nutrient reservoir activity; INVOLVED IN: biological_process unknown; LOCATED IN: apoplast; EXPRESSED IN: inflorescence meristem
Medtr5g047050	'20.2.99'	'stress.abiotic.unspecified'	C globular stage
Medtr6g015995	'20.2.99'	'stress.abiotic.unspecified'	T
Medtr8g007300	'20.2.99'	'stress.abiotic.unspecified'	nutrient reservoir activity; INVOLVED IN: response to salt stress; LOCATED IN: endomembrane system
Medtr8g020590	'20.2.99'	'stress.abiotic.unspecified'	RmlC-type (InterPro:IPR011051)
Medtr8g045560	'20.2.99'	'stress.abiotic.unspecified'	defense response; LOCATED IN: cellular_component unknown; EXPRESSED IN: 8 plant structures; EXPRESSED DURING: 6 growth stages; CONTAINS InterPro DOMAIN/s: Bet v I allergen (InterPro:IPR000916); BEST Arabidopsis thaliana protein match is: Polyketide cyclase/dehydrase and lipid transport superfamily protein (TAIR:AT5G28000.1); Has 1807 Blast hits to 1807 proteins in 277 species: Archae - 0; Bacteri…
Medtr2g078020	'21.1'	'redox.thioredoxin'	heat shock protein
Medtr5g037890	'21.1'	'redox.thioredoxin'	acting on sulfur group of donors
Medtr1g033390	'21.2'	'redox.ascorbate and glutathione'	integral to membrane; EXPRESSED IN: 16 plant structures; EXPRESSED DURING: 7 growth stages; CONTAINS InterPro DOMAIN/s: Cytochrome b561
Medtr5g022510	'21.2.1'	'redox.ascorbate and glutathione.ascorbate'	APX2
Medtr5g064610	'21.2.1'	'redox.ascorbate and glutathione.ascorbate'	no evidence of enzymatic activity has been found.; ascorbate peroxidase 4 (APX4); FUNCTIONS IN: peroxidase activity
Medtr7g115080	'21.2.1.1'	'redox.ascorbate and glutathione.ascorbate.GME'	5-epimerase 2 (EC 5.1.3.18) (GDP-Man 3
Medtr1g035690	'21.4'	'redox.glutaredoxins'	protein disulfide oxidoreductase activity; INVOLVED IN: intracellular signaling pathway
Medtr1g088920	'21.4'	'redox.glutaredoxins'	arsenate reductase (glutaredoxin) activity
Medtr2g014760	'21.4'	'redox.glutaredoxins'	a member of the glutaredoxin family that regulates protein redox state. GRX480 interacts with TGA factors and suppresses JA-responsive PDF1.2 transcription. GRX480 transcription is SA-inducible and requires NPR1. Maybe involved in SA/JA cross-talk.; GRX480; FUNCTIONS IN: electron carrier activity
Medtr2g019900	'21.4'	'redox.glutaredoxins'	arsenate reductase (glutaredoxin) activity
Medtr2g019950	'21.4'	'redox.glutaredoxins'	protein disulfide oxidoreductase activity; INVOLVED IN: cell redox homeostasis; CONTAINS InterPro DOMAIN/s: Glutaredoxin-like
Medtr3g017490	'21.4'	'redox.glutaredoxins'	protein disulfide oxidoreductase activity; INVOLVED IN: cell redox homeostasis; EXPRESSED IN: 23 plant structures; EXPRESSED DURING: 15 growth stages; CONTAINS InterPro DOMAIN/s: Thioredoxin fold (InterPro:IPR012335)
Medtr3g073590	'21.4'	'redox.glutaredoxins'	protein disulfide oxidoreductase activity; INVOLVED IN: cell redox homeostasis; LOCATED IN: cellular_component unknown; CONTAINS InterPro DOMAIN/s: Thioredoxin fold (InterPro:IPR012335)
Medtr4g079110	'21.4'	'redox.glutaredoxins'	a member of the glutaredoxin family that regulates protein redox state. GRX480 interacts with TGA factors and suppresses JA-responsive PDF1.2 transcription. GRX480 transcription is SA-inducible and requires NPR1. Maybe involved in SA/JA cross-talk.; GRX480; FUNCTIONS IN: electron carrier activity
Medtr4g119030	'21.4'	'redox.glutaredoxins'	arsenate reductase (glutaredoxin) activity
Medtr4g119040	'21.4'	'redox.glutaredoxins'	arsenate reductase (glutaredoxin) activity
Medtr7g090230	'21.4'	'redox.glutaredoxins'	protein disulfide oxidoreductase activity; INVOLVED IN: N-terminal protein myristoylation
Medtr7g106500	'21.4'	'redox.glutaredoxins'	protein disulfide oxidoreductase activity; INVOLVED IN: cell redox homeostasis; CONTAINS InterPro DOMAIN/s: Thioredoxin fold (InterPro:IPR012335)
Medtr8g044160	'21.99'	'redox.misc'	whereas no Cyt b5 reduction was observed when NADPH was used as the electron donor.; NADH:cytochrome B5 reductase 1 (CBR); FUNCTIONS IN: cytochrome-b5 reductase activity; INVOLVED IN: electron transport chain; LOCATED IN: endoplasmic reticulum
Medtr4g072020	'22.1.3'	'polyamine metabolism.synthesis.arginine decarboxylase'	a rate-limiting enzyme that catalyzes the first step of polyamine (PA) biosynthesis via ADC pathway in Arabidopsis thaliana. Arabidopsis genome has two ADC paralogs
Medtr4g112810	'22.1.4'	'polyamine metabolism.synthesis.agmatine deiminase'	Peptidyl-arginine deiminase
Medtr1g015300	'22.1.7'	'polyamine metabolism.synthesis.spermine synthase'	specifically in the mechanism that defines the boundaries between veins and nonvein regions. This mechanism may be mediated by polar auxin transport. Though ACL5 has been shown to function as a spermine synthase in E. coli
Medtr5g006140	'22.1.7'	'polyamine metabolism.synthesis.spermine synthase'	specifically in the mechanism that defines the boundaries between veins and nonvein regions. This mechanism may be mediated by polar auxin transport. Though ACL5 has been shown to function as a spermine synthase in E. coli
Medtr2g020750	'23.2'	'nucleotide metabolism.degradation'	T
Medtr7g085200	'23.2'	'nucleotide metabolism.degradation'	T
Medtr4g093580	'23.2.1.5'	'nucleotide metabolism.degradation.pyrimidine.beta-ureidopropionase'	when expressed in E. coli
Medtr3g082770	'23.3.3'	'nucleotide metabolism.salvage.NUDIX hydrolases'	ADP-ribose diphosphatase activity
Medtr3g460790	'23.3.3'	'nucleotide metabolism.salvage.NUDIX hydrolases'	NAD or NADH binding
Medtr5g062660	'23.3.3'	'nucleotide metabolism.salvage.NUDIX hydrolases'	dihydroneopterin triphosphate pyrophosphohydrolase activity
Medtr8g021233	'23.4.10'	'nucleotide metabolism.phosphotransfer and pyrophosphatases.nucleoside diphosphate kinase'	ATP binding; INVOLVED IN: UTP biosynthetic process
Medtr7g092020	'23.4.2'	'nucleotide metabolism.phosphotransfer and pyrophosphatases.guanylate kinase'	Guanylate kinase/L-type calcium channel (InterPro:IPR008145)
Medtr8g092510	'23.5.4'	'nucleotide metabolism.deoxynucleotide metabolism.ribonucleoside-diphosphate reductase'	ATP binding; INVOLVED IN: response to cadmium ion
Medtr3g113210	'24'	'Biodegradation of Xenobiotics'	flower; EXPRESSED DURING: 4 anthesis; CONTAINS InterPro DOMAIN/s: Galactose oxidase/kelch
Medtr4g019520	'24'	'Biodegradation of Xenobiotics'	beta-propeller (InterPro:IPR011043)
Medtr6g065430	'24'	'Biodegradation of Xenobiotics'	T
Medtr5g006370	'24.2'	'Biodegradation of Xenobiotics.lactoylglutathione lyase'	T
Medtr5g021610	'24.2'	'Biodegradation of Xenobiotics.lactoylglutathione lyase'	T
Medtr8g076160	'24.2'	'Biodegradation of Xenobiotics.lactoylglutathione lyase'	T
Medtr0057s0130	'26.1'	'misc.misc2'	catalytic activity; INVOLVED IN: peptidyl-pyroglutamic acid biosynthetic process
Medtr0181s0030	'26.10'	'misc.cytochrome P450'	family 93
Medtr1g492820	'26.10'	'misc.cytochrome P450'	family 77
Medtr2g010280	'26.10'	'misc.cytochrome P450'	family 89
Medtr2g019640	'26.10'	'misc.cytochrome P450'	but not that of 24-<i>epi</i>-campesterol to brassicasterol (unlike CYP710A2).; cytochrome P450
Medtr3g076530	'26.10'	'misc.cytochrome P450'	family 71
Medtr4g088160	'26.10'	'misc.cytochrome P450'	family 93
Medtr4g088170	'26.10'	'misc.cytochrome P450'	family 93
Medtr4g088195	'26.10'	'misc.cytochrome P450'	family 93
Medtr4g088415	'26.10'	'misc.cytochrome P450'	family 82
Medtr4g128020	'26.10'	'misc.cytochrome P450'	chloroplast; EXPRESSED IN: 24 plant structures; EXPRESSED DURING: 15 growth stages; CONTAINS InterPro DOMAIN/s: Ferredoxin reductase-type FAD-binding domain (InterPro:IPR017927)
Medtr5g016440	'26.10'	'misc.cytochrome P450'	family 81
Medtr5g045250	'26.10'	'misc.cytochrome P450'	promoting organ growth.; "cytochrome P450
Medtr6g008500	'26.10'	'misc.cytochrome P450'	family 82
Medtr6g035100	'26.10'	'misc.cytochrome P450'	family 71
Medtr8g098435	'26.10'	'misc.cytochrome P450'	leaves
Medtr3g079180	'26.11'	'misc.alcohol dehydrogenases'	zinc ion binding; INVOLVED IN: oxidation reduction; EXPRESSED IN: 11 plant structures; EXPRESSED DURING: 6 growth stages; CONTAINS InterPro DOMAIN/s: GroES-like (InterPro:IPR011032)
Medtr6g068930	'26.11'	'misc.alcohol dehydrogenases'	zinc ion binding; INVOLVED IN: oxidation reduction; EXPRESSED IN: 22 plant structures; EXPRESSED DURING: 13 growth stages; CONTAINS InterPro DOMAIN/s: GroES-like (InterPro:IPR011032)
Medtr4g077100	'26.11.1'	'misc.alcohol dehydrogenases.cinnamyl alcohol dehydrogenase'	apple tree
Medtr1g054205	'26.12'	'misc.peroxidases'	heme binding; INVOLVED IN: oxidation reduction
Medtr1g066680	'26.12'	'misc.peroxidases'	heme binding; INVOLVED IN: defense response to fungus; EXPRESSED IN: 15 plant structures; EXPRESSED DURING: 7 growth stages; CONTAINS InterPro DOMAIN/s: Haem peroxidase (InterPro:IPR010255)
Medtr1g077000	'26.12'	'misc.peroxidases'	heme binding; INVOLVED IN: response to oxidative stress
Medtr1g101830	'26.12'	'misc.peroxidases'	oxidation reduction; LOCATED IN: endomembrane system; EXPRESSED IN: 24 plant structures; EXPRESSED DURING: 13 growth stages; CONTAINS InterPro DOMAIN/s: Haem peroxidase (InterPro:IPR010255)
Medtr2g029815	'26.12'	'misc.peroxidases'	heme binding; INVOLVED IN: response to zinc ion
Medtr2g029820	'26.12'	'misc.peroxidases'	heme binding; INVOLVED IN: response to zinc ion
Medtr2g029830	'26.12'	'misc.peroxidases'	heme binding; INVOLVED IN: response to zinc ion
Medtr2g078610	'26.12'	'misc.peroxidases'	heme binding; INVOLVED IN: response to oxidative stress
Medtr3g072210	'26.12'	'misc.peroxidases'	heme binding; INVOLVED IN: response to other organism; LOCATED IN: cell wall; EXPRESSED IN: 8 plant structures; EXPRESSED DURING: 4 anthesis
Medtr3g072260	'26.12'	'misc.peroxidases'	heme binding; INVOLVED IN: oxidation reduction
Medtr3g094650	'26.12'	'misc.peroxidases'	peroxidase activity; INVOLVED IN: response to oxidative stress
Medtr3g094670	'26.12'	'misc.peroxidases'	peroxidase activity; INVOLVED IN: response to oxidative stress
Medtr3g105790	'26.12'	'misc.peroxidases'	heme binding; INVOLVED IN: oxidation reduction
Medtr3g466200	'26.12'	'misc.peroxidases'	heme binding; INVOLVED IN: oxidation reduction
Medtr4g095450	'26.12'	'misc.peroxidases'	heme binding; INVOLVED IN: response to oxidative stress
Medtr4g132110	'26.12'	'misc.peroxidases'	heme binding; INVOLVED IN: response to oxidative stress
Medtr5g021060	'26.12'	'misc.peroxidases'	heme binding; INVOLVED IN: response to oxidative stress
Medtr8g075100	'26.12'	'misc.peroxidases'	heme binding; INVOLVED IN: oxidation reduction
Medtr8g076820	'26.12'	'misc.peroxidases'	heme binding; INVOLVED IN: response to oxidative stress
Medtr1g112630	'26.13'	'misc.acid and other phosphatases'	acid phosphatase activity; INVOLVED IN: biological_process unknown; LOCATED IN: cell wall
Medtr2g021310	'26.13'	'misc.acid and other phosphatases'	Armadillo (InterPro:IPR000225)
Medtr2g100340	'26.13'	'misc.acid and other phosphatases'	PHOSPHO2 (InterPro:IPR016965)
Medtr3g083810	'26.13'	'misc.acid and other phosphatases'	a purple acid phosphatase with phytase activity. Expression of PAP15 is developmentally and temporally regulated
Medtr4g103520	'26.13'	'misc.acid and other phosphatases'	acid phosphatase activity; INVOLVED IN: biological_process unknown; LOCATED IN: endomembrane system; EXPRESSED IN: 24 plant structures; EXPRESSED DURING: 15 growth stages; CONTAINS InterPro DOMAIN/s: Purple acid phosphatase
Medtr7g065890	'26.13'	'misc.acid and other phosphatases'	T
Medtr8g005420	'26.13'	'misc.acid and other phosphatases'	subfamily IIIB acid phosphatase ; FUNCTIONS IN: acid phosphatase activity; INVOLVED IN: biological_process unknown; LOCATED IN: endomembrane system; EXPRESSED IN: 15 plant structures; EXPRESSED DURING: 6 growth stages; CONTAINS InterPro DOMAIN/s: Acid phosphatase (Class B) (InterPro:IPR005519)
Medtr8g005530	'26.13'	'misc.acid and other phosphatases'	subfamily IIIB acid phosphatase ; FUNCTIONS IN: acid phosphatase activity; INVOLVED IN: biological_process unknown; LOCATED IN: endomembrane system; EXPRESSED IN: 15 plant structures; EXPRESSED DURING: 6 growth stages; CONTAINS InterPro DOMAIN/s: Acid phosphatase (Class B) (InterPro:IPR005519)
Medtr8g006575	'26.13'	'misc.acid and other phosphatases'	subfamily IIIB acid phosphatase ; FUNCTIONS IN: acid phosphatase activity; INVOLVED IN: biological_process unknown; LOCATED IN: endomembrane system; EXPRESSED IN: 15 plant structures; EXPRESSED DURING: 6 growth stages; CONTAINS InterPro DOMAIN/s: Acid phosphatase (Class B) (InterPro:IPR005519)
Medtr8g006600	'26.13'	'misc.acid and other phosphatases'	subfamily IIIB acid phosphatase ; FUNCTIONS IN: acid phosphatase activity; INVOLVED IN: biological_process unknown; LOCATED IN: endomembrane system; EXPRESSED IN: 15 plant structures; EXPRESSED DURING: 6 growth stages; CONTAINS InterPro DOMAIN/s: Acid phosphatase (Class B) (InterPro:IPR005519)
Medtr8g006690	'26.13'	'misc.acid and other phosphatases'	subfamily IIIB acid phosphatase ; FUNCTIONS IN: acid phosphatase activity; INVOLVED IN: biological_process unknown; LOCATED IN: endomembrane system; EXPRESSED IN: 15 plant structures; EXPRESSED DURING: 6 growth stages; CONTAINS InterPro DOMAIN/s: Acid phosphatase (Class B) (InterPro:IPR005519)
Medtr8g014650	'26.13'	'misc.acid and other phosphatases'	subfamily IIIB acid phosphatase ; FUNCTIONS IN: acid phosphatase activity; INVOLVED IN: biological_process unknown; LOCATED IN: endomembrane system; EXPRESSED IN: 21 plant structures; EXPRESSED DURING: 9 growth stages; CONTAINS InterPro DOMAIN/s: Acid phosphatase (Class B) (InterPro:IPR005519)
Medtr8g023770	'26.13'	'misc.acid and other phosphatases'	acid phosphatase activity; LOCATED IN: endomembrane system; EXPRESSED IN: 23 plant structures; EXPRESSED DURING: 13 growth stages; CONTAINS InterPro DOMAIN/s: Metallophosphoesterase (InterPro:IPR004843)
Medtr8g046260	'26.13'	'misc.acid and other phosphatases'	subfamily IIIB acid phosphatase ; FUNCTIONS IN: acid phosphatase activity; INVOLVED IN: biological_process unknown; LOCATED IN: endomembrane system; EXPRESSED IN: 21 plant structures; EXPRESSED DURING: 9 growth stages; CONTAINS InterPro DOMAIN/s: Acid phosphatase (Class B) (InterPro:IPR005519)
Medtr8g106800	'26.14'	'misc.oxygenases'	Haem peroxidase
Medtr0113s0040	'26.16'	'misc.myrosinases-lectin-jacalin'	cyclin-like (InterPro:IPR001810)
Medtr0163s0020	'26.16'	'misc.myrosinases-lectin-jacalin'	subgroup & (at5g10530 : 103.0) Concanavalin A-like lectin protein kinase family protein; FUNCTIONS IN: kinase activity; INVOLVED IN: protein amino acid phosphorylation; LOCATED IN: endomembrane system; EXPRESSED IN: root; CONTAINS InterPro DOMAIN/s: Legume lectin
Medtr0684s0020	'26.16'	'misc.myrosinases-lectin-jacalin'	beta chain & (at5g10530 : 103.0) Concanavalin A-like lectin protein kinase family protein; FUNCTIONS IN: kinase activity; INVOLVED IN: protein amino acid phosphorylation; LOCATED IN: endomembrane system; EXPRESSED IN: root; CONTAINS InterPro DOMAIN/s: Legume lectin
Medtr1g090930	'26.16'	'misc.myrosinases-lectin-jacalin'	beta chain & (at5g10530 : 80.1) Concanavalin A-like lectin protein kinase family protein; FUNCTIONS IN: kinase activity; INVOLVED IN: protein amino acid phosphorylation; LOCATED IN: endomembrane system; EXPRESSED IN: root; CONTAINS InterPro DOMAIN/s: Legume lectin
Medtr1g090937	'26.16'	'misc.myrosinases-lectin-jacalin'	beta chain & (at5g65600 : 89.0) Concanavalin A-like lectin protein kinase family protein; FUNCTIONS IN: kinase activity; INVOLVED IN: protein amino acid phosphorylation; LOCATED IN: endomembrane system; EXPRESSED IN: stem; CONTAINS InterPro DOMAIN/s: Legume lectin
Medtr3g031490	'26.16'	'misc.myrosinases-lectin-jacalin'	sugar binding
Medtr4g094858	'26.16'	'misc.myrosinases-lectin-jacalin'	protein kinase activity; INVOLVED IN: protein amino acid phosphorylation; LOCATED IN: plasma membrane
Medtr4g114240	'26.16'	'misc.myrosinases-lectin-jacalin'	recognition of pollen; LOCATED IN: plasma membrane; EXPRESSED IN: 23 plant structures; EXPRESSED DURING: 13 growth stages; CONTAINS InterPro DOMAIN/s: Curculin-like (mannose-binding) lectin (InterPro:IPR001480)
Medtr5g010800	'26.16'	'misc.myrosinases-lectin-jacalin'	suggesting that this protein could potentially have carbohydrate binding capabilities.; phloem protein 2-A12 (PP2-A12); CONTAINS InterPro DOMAIN/s: F-box domain
Medtr7g053050	'26.16'	'misc.myrosinases-lectin-jacalin'	protein kinase activity; INVOLVED IN: protein amino acid phosphorylation; LOCATED IN: plasma membrane
Medtr7g058530	'26.16'	'misc.myrosinases-lectin-jacalin'	protein kinase activity; INVOLVED IN: protein amino acid phosphorylation; LOCATED IN: plasma membrane
Medtr7g058550	'26.16'	'misc.myrosinases-lectin-jacalin'	protein kinase activity; INVOLVED IN: protein amino acid phosphorylation; LOCATED IN: plasma membrane
Medtr8g087770	'26.17'	'misc.dynamin'	GTPase activity; INVOLVED IN: biological_process unknown; LOCATED IN: cellular_component unknown; EXPRESSED IN: egg cell; CONTAINS InterPro DOMAIN/s: Dynamin GTPase effector (InterPro:IPR003130)
Medtr4g122740	'26.18'	'misc.invertase/pectin methylesterase inhibitor family protein'	pectinesterase inhibitor activity
Medtr8g009300	'26.18'	'misc.invertase/pectin methylesterase inhibitor family protein'	pectinesterase inhibitor activity
Medtr3g089035	'26.19'	'misc.plastocyanin-like'	copper ion binding; INVOLVED IN: pollination
Medtr3g099580	'26.19'	'misc.plastocyanin-like'	copper ion binding; LOCATED IN: anchored to membrane; EXPRESSED IN: 17 plant structures; EXPRESSED DURING: 9 growth stages; CONTAINS InterPro DOMAIN/s: Plastocyanin-like (InterPro:IPR003245)
Medtr4g081100	'26.19'	'misc.plastocyanin-like'	copper ion binding; LOCATED IN: anchored to membrane; EXPRESSED IN: 22 plant structures; EXPRESSED DURING: 13 growth stages; CONTAINS InterPro DOMAIN/s: Plastocyanin-like (InterPro:IPR003245)
Medtr5g006040	'26.19'	'misc.plastocyanin-like'	copper ion binding; LOCATED IN: anchored to membrane; EXPRESSED IN: 16 plant structures; EXPRESSED DURING: 10 growth stages; CONTAINS InterPro DOMAIN/s: Plastocyanin-like (InterPro:IPR003245)
Medtr5g088990	'26.19'	'misc.plastocyanin-like'	copper ion binding; LOCATED IN: anchored to membrane; EXPRESSED IN: 14 plant structures; EXPRESSED DURING: LP.06 six leaves visible
Medtr6g013420	'26.19'	'misc.plastocyanin-like'	copper ion binding; LOCATED IN: anchored to plasma membrane
Medtr6g023760	'26.19'	'misc.plastocyanin-like'	copper ion binding; LOCATED IN: anchored to membrane; EXPRESSED IN: 22 plant structures; EXPRESSED DURING: 12 growth stages; CONTAINS InterPro DOMAIN/s: Plastocyanin-like (InterPro:IPR003245)
Medtr8g007020	'26.19'	'misc.plastocyanin-like'	copper ion binding; LOCATED IN: anchored to membrane; CONTAINS InterPro DOMAIN/s: Plastocyanin-like (InterPro:IPR003245)
Medtr8g007035	'26.19'	'misc.plastocyanin-like'	copper ion binding; LOCATED IN: anchored to membrane; CONTAINS InterPro DOMAIN/s: Plastocyanin-like (InterPro:IPR003245)
Medtr8g095020	'26.19'	'misc.plastocyanin-like'	copper ion binding; LOCATED IN: endomembrane system; EXPRESSED IN: 14 plant structures; EXPRESSED DURING: 10 growth stages; CONTAINS InterPro DOMAIN/s: Plastocyanin-like (InterPro:IPR003245)
Medtr8g463180	'26.19'	'misc.plastocyanin-like'	copper ion binding; LOCATED IN: in 6 components; EXPRESSED IN: 24 plant structures; EXPRESSED DURING: 13 growth stages; CONTAINS InterPro DOMAIN/s: Plastocyanin-like (InterPro:IPR003245)
Medtr1g090733	'26.2'	'misc.UDP glucosyl and glucoronyl transferases'	membrane; CONTAINS InterPro DOMAIN/s: Exostosin-like (InterPro:IPR004263); BEST Arabidopsis thaliana protein match is: Exostosin family protein (TAIR:AT5G19670.1); Has 1807 Blast hits to 1807 proteins in 277 species: Archae - 0; Bacteria - 0; Metazoa - 736; Fungi - 347; Plants - 385; Viruses - 0; Other Eukaryotes - 339 (source: NCBI BLink). & (gnl|cdd|36239 : 292.0) no description available & (gn…
Medtr1g090920	'26.2'	'misc.UDP glucosyl and glucoronyl transferases'	transferring glycosyl groups; INVOLVED IN: biological_process unknown; LOCATED IN: intrinsic to endoplasmic reticulum membrane; EXPRESSED IN: embryo
Medtr1g102430	'26.2'	'misc.UDP glucosyl and glucoronyl transferases'	membrane; EXPRESSED IN: 23 plant structures; EXPRESSED DURING: 13 growth stages; CONTAINS InterPro DOMAIN/s: Exostosin-like (InterPro:IPR004263); BEST Arabidopsis thaliana protein match is: Exostosin family protein (TAIR:AT2G20370.1); Has 691 Blast hits to 690 proteins in 30 species: Archae - 0; Bacteria - 0; Metazoa - 6; Fungi - 0; Plants - 667; Viruses - 0; Other Eukaryotes - 18 (source: NCBI B…
Medtr1g107360	'26.2'	'misc.UDP glucosyl and glucoronyl transferases'	T
Medtr3g031400	'26.2'	'misc.UDP glucosyl and glucoronyl transferases'	transferring hexosyl groups
Medtr3g073370	'26.2'	'misc.UDP glucosyl and glucoronyl transferases'	transferring glycosyl groups
Medtr3g084400	'26.2'	'misc.UDP glucosyl and glucoronyl transferases'	membrane; EXPRESSED IN: 18 plant structures; EXPRESSED DURING: 7 growth stages; CONTAINS InterPro DOMAIN/s: Exostosin-like (InterPro:IPR004263); BEST Arabidopsis thaliana protein match is: Exostosin family protein (TAIR:AT2G20370.1); Has 564 Blast hits to 563 proteins in 23 species: Archae - 0; Bacteria - 0; Metazoa - 6; Fungi - 0; Plants - 547; Viruses - 0; Other Eukaryotes - 11 (source: NCBI BL…
Medtr3g092310	'26.2'	'misc.UDP glucosyl and glucoronyl transferases'	transferring hexosyl groups
Medtr3g452360	'26.2'	'misc.UDP glucosyl and glucoronyl transferases'	family 8 (InterPro:IPR002495); BEST Arabidopsis thaliana protein match is: galacturonosyltransferase 14 (TAIR:AT5G15470.1); Has 1513 Blast hits to 1502 proteins in 296 species: Archae - 0; Bacteria - 573; Metazoa - 140; Fungi - 8; Plants - 775; Viruses - 2; Other Eukaryotes - 15 (source: NCBI BLink). & (gnl|cdd|85496 : 147.0) no description available & (ipr002495 : 117.49371) Glycosyl transferase
Medtr4g008010	'26.2'	'misc.UDP glucosyl and glucoronyl transferases'	6-N-acetylglucosaminyltransferase family protein; FUNCTIONS IN: transferase activity
Medtr4g115530	'26.2'	'misc.UDP glucosyl and glucoronyl transferases'	T
Medtr5g036580	'26.2'	'misc.UDP glucosyl and glucoronyl transferases'	transferring hexosyl groups
Medtr5g045960	'26.2'	'misc.UDP glucosyl and glucoronyl transferases'	transferring hexosyl groups
Medtr5g090620	'26.2'	'misc.UDP glucosyl and glucoronyl transferases'	a UDP glycosyltransferase (UGT). HYR1 glucosylates hypostatin
Medtr6g011080	'26.2'	'misc.UDP glucosyl and glucoronyl transferases'	6-N-acetylglucosaminyltransferase family protein; FUNCTIONS IN: transferase activity
Medtr6g027550	'26.2'	'misc.UDP glucosyl and glucoronyl transferases'	transferring glycosyl groups
Medtr7g013180	'26.2'	'misc.UDP glucosyl and glucoronyl transferases'	transferase activity
Medtr1g012710	'26.21'	'misc.protease inhibitor/seed storage/lipid transfer protein (LTP) family protein'	Plant lipid transfer protein/seed storage/trypsin-alpha amylase inhibitor (InterPro:IPR003612)
Medtr3g079210	'26.21'	'misc.protease inhibitor/seed storage/lipid transfer protein (LTP) family protein'	Plant lipid transfer protein/seed storage/trypsin-alpha amylase inhibitor (InterPro:IPR003612); BEST Arabidopsis thaliana protein match is: Bifunctional inhibitor/lipid-transfer protein/seed storage 2S albumin superfamily protein (TAIR:AT2G27130.1); Has 35333 Blast hits to 34131 proteins in 2444 species: Archae - 798; Bacteria - 22429; Metazoa - 974; Fungi - 991; Plants - 531; Viruses - 0; Other …
Medtr3g082100	'26.21'	'misc.protease inhibitor/seed storage/lipid transfer protein (LTP) family protein'	Plant lipid transfer protein/seed storage/trypsin-alpha amylase inhibitor (InterPro:IPR003612)
Medtr7g007440	'26.21'	'misc.protease inhibitor/seed storage/lipid transfer protein (LTP) family protein'	Plant lipid transfer protein/seed storage/trypsin-alpha amylase inhibitor (InterPro:IPR003612)
Medtr7g065210	'26.21'	'misc.protease inhibitor/seed storage/lipid transfer protein (LTP) family protein'	Plant lipid transfer protein/seed storage/trypsin-alpha amylase inhibitor (InterPro:IPR003612); BEST Arabidopsis thaliana protein match is: Bifunctional inhibitor/lipid-transfer protein/seed storage 2S albumin superfamily protein (TAIR:AT5G05960.1); Has 183 Blast hits to 183 proteins in 26 species: Archae - 0; Bacteria - 0; Metazoa - 0; Fungi - 0; Plants - 183; Viruses - 0; Other Eukaryotes - 0 (…
Medtr7g095230	'26.21'	'misc.protease inhibitor/seed storage/lipid transfer protein (LTP) family protein'	Plant lipid transfer protein/seed storage/trypsin-alpha amylase inhibitor (InterPro:IPR003612)
Medtr1g068970	'26.22'	'misc.short chain dehydrogenase/reductase (SDR)'	binding
Medtr6g023600	'26.22'	'misc.short chain dehydrogenase/reductase (SDR)'	binding
Medtr7g071680	'26.22'	'misc.short chain dehydrogenase/reductase (SDR)'	binding
Medtr7g099850	'26.22'	'misc.short chain dehydrogenase/reductase (SDR)'	binding
Medtr7g110130	'26.22'	'misc.short chain dehydrogenase/reductase (SDR)'	binding
Medtr8g031980	'26.22'	'misc.short chain dehydrogenase/reductase (SDR)'	Glucose/ribitol dehydrogenase (InterPro:IPR002347)
Medtr1g103150	'26.24'	'misc.GCN5-related N-acetyltransferase'	C-terminal (InterPro:IPR022610)
Medtr0565s0010	'26.28'	'misc.GDSL-motif lipase'	acting on ester bonds
Medtr1g025680	'26.28'	'misc.GDSL-motif lipase'	GDSL
Medtr1g025700	'26.28'	'misc.GDSL-motif lipase'	GDSL
Medtr1g025720	'26.28'	'misc.GDSL-motif lipase'	GDSL
Medtr1g030220	'26.28'	'misc.GDSL-motif lipase'	acting on ester bonds
Medtr2g015080	'26.28'	'misc.GDSL-motif lipase'	hydrolase activity
Medtr2g017965	'26.28'	'misc.GDSL-motif lipase'	acting on ester bonds
Medtr2g100620	'26.28'	'misc.GDSL-motif lipase'	acting on ester bonds
Medtr3g005660	'26.28'	'misc.GDSL-motif lipase'	acting on ester bonds
Medtr3g024510	'26.28'	'misc.GDSL-motif lipase'	acting on ester bonds
Medtr3g052480	'26.28'	'misc.GDSL-motif lipase'	acting on ester bonds
Medtr3g464730	'26.28'	'misc.GDSL-motif lipase'	acting on ester bonds
Medtr4g104240	'26.28'	'misc.GDSL-motif lipase'	acting on ester bonds
Medtr5g084750	'26.28'	'misc.GDSL-motif lipase'	acting on ester bonds
Medtr5g084790	'26.28'	'misc.GDSL-motif lipase'	acting on ester bonds
Medtr7g033150	'26.28'	'misc.GDSL-motif lipase'	acting on ester bonds
Medtr7g033165	'26.28'	'misc.GDSL-motif lipase'	acting on ester bonds
Medtr7g068550	'26.28'	'misc.GDSL-motif lipase'	hydrolase activity
Medtr7g113860	'26.28'	'misc.GDSL-motif lipase'	acting on ester bonds
Medtr8g014910	'26.28'	'misc.GDSL-motif lipase'	acting on ester bonds
Medtr8g087870	'26.28'	'misc.GDSL-motif lipase'	acting on ester bonds
Medtr0110s0020	'26.3'	'misc.gluco-	'(at3g18080 : 403.0) B-S glucosidase 44 (BGLU44); FUNCTIONS IN: in 6 functions; INVOLVED IN: carbohydrate metabolic process; LOCATED IN: cytosolic ribosome
Medtr1g082890	'26.3'	'misc.gluco-	'(q5h7p5|ebm_lillo : 1475.0) Mannosylglycoprotein endo-beta-mannosidase (EC 3.2.1.152) (Endo-beta-mannosidase) [Contains: Mannosylglycoprotein endo-beta-mannosidase 31 kDa subunit; Mannosylglycoprotein endo-beta-mannosidase 28 kDa subunit; Mannosylglycoprotein endo- & (at1g09010 : 1407.0) glycoside hydrolase family 2 protein; FUNCTIONS IN: cation binding
Medtr3g026400	'26.3'	'misc.gluco-	'(gnl|cdd|35845 : 651.0) no description available & (at2g44480 : 550.0) beta glucosidase 17 (BGLU17); FUNCTIONS IN: cation binding
Medtr4g124440	'26.3'	'misc.gluco-	'(at5g20870 : 606.0) O-Glycosyl hydrolases family 17 protein; FUNCTIONS IN: cation binding
Medtr4g131810	'26.3'	'misc.gluco-	'(gnl|cdd|35845 : 620.0) no description available & (at1g61820 : 607.0) beta glucosidase 46 (BGLU46); FUNCTIONS IN: cation binding
Medtr1g110980	'26.3.1'	'misc.gluco-	'(at1g68560 : 1437.0) Encodes a bifunctional alpha-l-arabinofuranosidase/beta-d-xylosidase that belongs to family 3 of glycoside hydrolases.; alpha-xylosidase 1 (XYL1); FUNCTIONS IN: xyloglucan 1
Medtr1g023120	'26.3.2'	'misc.gluco-	'(at1g45130 : 1046.0) beta-galactosidase 5 (BGAL5); FUNCTIONS IN: cation binding
Medtr2g094060	'26.3.2'	'misc.gluco-	'(at2g28470 : 1004.0) putative beta-galactosidase (BGAL8 gene); beta-galactosidase 8 (BGAL8); FUNCTIONS IN: cation binding
Medtr3g096900	'26.3.2'	'misc.gluco-	'(at5g63810 : 1070.0) member of Glycoside Hydrolase Family 35; beta-galactosidase 10 (BGAL10); FUNCTIONS IN: cation binding
Medtr3g096910	'26.3.2'	'misc.gluco-	'(at5g63800 : 724.0) Involved in mucilage formation. Mutants form columella and outer cell wall architecture of the mucilage cells resembles wild-type. However
Medtr3g117840	'26.3.2'	'misc.gluco-	'(at2g16730 : 1039.0) putative beta-galactosidase (BGAL13 gene); glycosyl hydrolase family 35 protein; FUNCTIONS IN: beta-galactosidase activity; INVOLVED IN: lactose catabolic process
Medtr5g021190	'26.3.2'	'misc.gluco-	'(at4g36360 : 1444.0) putative beta-galactosidase (BGAL3 gene); beta-galactosidase 3 (BGAL3); FUNCTIONS IN: beta-galactosidase activity; INVOLVED IN: carbohydrate metabolic process; LOCATED IN: endomembrane system; EXPRESSED IN: 23 plant structures; EXPRESSED DURING: 13 growth stages; CONTAINS InterPro DOMAIN/s: Glycoside hydrolase
Medtr3g098650	'26.3.3'	'misc.gluco-	'(at5g13980 : 1419.0) Glycosyl hydrolase family 38 protein; FUNCTIONS IN: in 6 functions; INVOLVED IN: mannose metabolic process
Medtr8g075330	'26.3.3'	'misc.gluco-	'(at5g66150 : 1348.0) Glycosyl hydrolase family 38 protein; FUNCTIONS IN: in 6 functions; INVOLVED IN: mannose metabolic process
Medtr1g084820	'26.4'	'misc.beta 1	'(at1g09460 : 129.0) Carbohydrate-binding X8 domain superfamily protein; LOCATED IN: endomembrane system; EXPRESSED IN: 19 plant structures; EXPRESSED DURING: 12 growth stages; CONTAINS InterPro DOMAIN/s: X8 (InterPro:IPR012946); BEST Arabidopsis thaliana protein match is: Carbohydrate-binding X8 domain superfamily protein (TAIR:AT2G30933.1); Has 28400 Blast hits to 14800 proteins in 1032 species…
Medtr2g049670	'26.4'	'misc.beta 1	'(at1g29380 : 120.0) Carbohydrate-binding X8 domain superfamily protein; FUNCTIONS IN: molecular_function unknown; INVOLVED IN: biological_process unknown; LOCATED IN: endomembrane system; CONTAINS InterPro DOMAIN/s: X8 (InterPro:IPR012946); BEST Arabidopsis thaliana protein match is: Carbohydrate-binding X8 domain superfamily protein (TAIR:AT2G30933.1); Has 79591 Blast hits to 28935 proteins in …
Medtr5g097420	'26.4'	'misc.beta 1	'(at5g35740 : 155.0) Carbohydrate-binding X8 domain superfamily protein; FUNCTIONS IN: molecular_function unknown; INVOLVED IN: biological_process unknown; LOCATED IN: endomembrane system; EXPRESSED IN: 18 plant structures; EXPRESSED DURING: 10 growth stages; CONTAINS InterPro DOMAIN/s: X8 (InterPro:IPR012946); BEST Arabidopsis thaliana protein match is: Carbohydrate-binding X8 domain superfamily…
Medtr1g022160	'26.4.1'	'misc.beta 1	'medtr1g022160.5'
Medtr1g077990	'26.4.1'	'misc.beta 1	'medtr1g077990.1'
Medtr2g034440	'26.4.1'	'misc.beta 1	'medtr2g034440.1'
Medtr4g010200	'26.4.1'	'misc.beta 1	'medtr4g010200.1'
Medtr4g076255	'26.4.1'	'misc.beta 1	'medtr4g076255.1'
Medtr4g076430	'26.4.1'	'misc.beta 1	'medtr4g076430.1'
Medtr4g076440	'26.4.1'	'misc.beta 1	'medtr4g076440.1'
Medtr4g076490	'26.4.1'	'misc.beta 1	'medtr4g076490.1'
Medtr4g076570	'26.4.1'	'misc.beta 1	'medtr4g076570.1'
Medtr4g112025	'26.4.1'	'misc.beta 1	'medtr4g112025.1'
Medtr7g026340	'26.4.1'	'misc.beta 1	'medtr7g026340.1'
Medtr8g102340	'26.4.1'	'misc.beta 1	'medtr8g102340.1'
Medtr8g028160	'26.5'	'misc.acyl transferases'	acting on ester bonds
Medtr0079s0070	'26.6'	'misc.O-methyl transferases'	quercetin 3-O-methyltransferase activity
Medtr0591s0010	'26.6'	'misc.O-methyl transferases'	quercetin 3-O-methyltransferase activity
Medtr1g036460	'26.6'	'misc.O-methyl transferases'	quercetin 3-O-methyltransferase activity
Medtr3g083620	'26.6'	'misc.O-methyl transferases'	O-methyltransferase activity
Medtr4g038440	'26.6'	'misc.O-methyl transferases'	quercetin 3-O-methyltransferase activity
Medtr4g088190	'26.6'	'misc.O-methyl transferases'	family 2 & (at4g35160 : 147.0) O-methyltransferase family protein; FUNCTIONS IN: methyltransferase activity
Medtr7g118300	'26.6'	'misc.O-methyl transferases'	quercetin 3-O-methyltransferase activity
Medtr8g068600	'26.6'	'misc.O-methyl transferases'	quercetin 3-O-methyltransferase activity
Medtr8g068620	'26.6'	'misc.O-methyl transferases'	quercetin 3-O-methyltransferase activity
Medtr1g104590	'26.7'	'misc.oxidases - copper	'(at1g31690 : 824.0) Copper amine oxidase family protein; FUNCTIONS IN: quinone binding
Medtr2g039160	'26.7'	'misc.oxidases - copper	'(at4g29720 : 570.0) polyamine oxidase 5 (PAO5); FUNCTIONS IN: primary amine oxidase activity; LOCATED IN: endomembrane system; EXPRESSED IN: 22 plant structures; EXPRESSED DURING: 13 growth stages; CONTAINS InterPro DOMAIN/s: Amine oxidase (InterPro:IPR002937); BEST Arabidopsis thaliana protein match is: LSD1-like 3 (TAIR:AT4G16310.1); Has 3107 Blast hits to 2713 proteins in 458 species: Archae …
Medtr2g450310	'26.7'	'misc.oxidases - copper	'(at1g19250 : 366.0) FMO1 is required for full expression of TIR-NB-LRR??conditioned resistance to avirulent pathogens and for basal resistance to invasive virulent pathogens. Functions in an EDS1-regulated but SA-independent mechanism that promotes resistance and cell death at pathogen infection sites.; flavin-dependent monooxygenase 1 (FMO1); FUNCTIONS IN: NADP or NADPH binding
Medtr3g008580	'26.7'	'misc.oxidases - copper	'(at4g25240 : 804.0) Encodes GPI-anchored SKU5-like protein.; SKU5 similar 1 (SKS1); FUNCTIONS IN: oxidoreductase activity
Medtr4g045887	'26.7'	'misc.oxidases - copper	'(q43077|amo_pea : 1181.0) Amine oxidase [copper-containing] precursor (EC 1.4.3.6) - Pisum sativum (Garden pea) & (at1g31710 : 682.0) Copper amine oxidase family protein; FUNCTIONS IN: primary amine oxidase activity
Medtr4g124800	'26.7'	'misc.oxidases - copper	'(at1g19250 : 686.0) FMO1 is required for full expression of TIR-NB-LRR??conditioned resistance to avirulent pathogens and for basal resistance to invasive virulent pathogens. Functions in an EDS1-regulated but SA-independent mechanism that promotes resistance and cell death at pathogen infection sites.; flavin-dependent monooxygenase 1 (FMO1); FUNCTIONS IN: NADP or NADPH binding
Medtr5g018270	'26.7'	'misc.oxidases - copper	'(at5g66920 : 726.0) SKU5 similar 17 (sks17); FUNCTIONS IN: oxidoreductase activity
Medtr7g086090	'26.7'	'misc.oxidases - copper	'(at3g17675 : 90.9) Encodes a Plantacyanin/Basic blue family protein; Cupredoxin superfamily protein; FUNCTIONS IN: electron carrier activity
Medtr8g010000	'26.7'	'misc.oxidases - copper	'(at5g16970 : 453.0) encodes a 2-alkenal reductase (EC 1.3.1.74)
Medtr8g479390	'26.7'	'misc.oxidases - copper	'(at5g66920 : 748.0) SKU5 similar 17 (sks17); FUNCTIONS IN: oxidoreductase activity
Medtr4g094518	'26.8'	'misc.nitrilases	reticuline oxidases
Medtr5g011010	'26.8'	'misc.nitrilases	reticuline oxidases
Medtr5g018300	'26.8'	'misc.nitrilases	reticuline oxidases
Medtr5g041340	'26.8'	'misc.nitrilases	reticuline oxidases
Medtr8g080880	'26.8'	'misc.nitrilases	reticuline oxidases
Medtr0186s0030	'26.9'	'misc.glutathione S transferases'	oxidative stress
Medtr4g019780	'26.9'	'misc.glutathione S transferases'	toxin catabolic process; LOCATED IN: cytoplasm; EXPRESSED IN: 7 plant structures; EXPRESSED DURING: LP.06 six leaves visible
Medtr4g059730	'26.9'	'misc.glutathione S transferases'	toxin catabolic process; LOCATED IN: cytoplasm; EXPRESSED IN: 7 plant structures; EXPRESSED DURING: LP.06 six leaves visible
Medtr7g065600	'26.9'	'misc.glutathione S transferases'	toxin catabolic process; LOCATED IN: cytoplasm; EXPRESSED IN: 7 plant structures; EXPRESSED DURING: LP.06 six leaves visible
Medtr7g065630	'26.9'	'misc.glutathione S transferases'	Glutathione S-transferase
Medtr7g065660	'26.9'	'misc.glutathione S transferases'	toxin catabolic process; LOCATED IN: cytoplasm; EXPRESSED IN: 7 plant structures; EXPRESSED DURING: LP.06 six leaves visible
Medtr7g065680	'26.9'	'misc.glutathione S transferases'	toxin catabolic process; LOCATED IN: cytoplasm; EXPRESSED IN: 7 plant structures; EXPRESSED DURING: LP.06 six leaves visible
Medtr8g087410	'26.9'	'misc.glutathione S transferases'	Glutathione S-transferase
Medtr8g087425	'26.9'	'misc.glutathione S transferases'	Glutathione S-transferase
Medtr1g063040	'27.1'	'RNA.processing'	curled leaves and reduced abundance of certain miRNA species.; HASTY (HST); CONTAINS InterPro DOMAIN/s: Exportin-1/Importin-beta-like (InterPro:IPR013598)
Medtr1g097440	'27.1'	'RNA.processing'	including mRNA turnover and translational initiation. Expression detected only in floral organs.; poly(A) binding protein 3 (PAB3); CONTAINS InterPro DOMAIN/s: Polyadenylate-binding protein/Hyperplastic disc protein (InterPro:IPR002004)
Medtr3g064190	'27.1.1'	'RNA.processing.splicing'	seed; EXPRESSED DURING: E expanded cotyledon stage; BEST Arabidopsis thaliana protein match is: P-loop containing nucleoside triphosphate hydrolases superfamily protein (TAIR:AT1G65780.1). & (gnl|cdd|37012 : 491.0) no description available & (gnl|cdd|31309 : 159.0) no description available & (reliability: 1360.0) & (original description: no original description)'
Medtr0002s1200	'27.1.19'	'RNA.processing.ribonucleases'	endoribonuclease activity
Medtr3g080000	'27.1.19'	'RNA.processing.ribonucleases'	ribonuclease III activity; INVOLVED IN: RNA processing; LOCATED IN: cellular_component unknown; EXPRESSED IN: root; CONTAINS InterPro DOMAIN/s: Ribonuclease III (InterPro:IPR000999); BEST Arabidopsis thaliana protein match is: RNAse THREE-like protein 2 (TAIR:AT3G20420.1); Has 6428 Blast hits to 6386 proteins in 2315 species: Archae - 23; Bacteria - 4325; Metazoa - 271; Fungi - 247; Plants - 236;…
Medtr5g092740	'27.1.19'	'RNA.processing.ribonucleases'	mitochondrion
Medtr7g089090	'27.1.19'	'RNA.processing.ribonucleases'	T
Medtr4g114120	'27.1.2'	'RNA.processing.RNA helicase'	ATP-dependent helicase activity
Medtr2g030490	'27.1.20'	'RNA.processing.degradation dicer'	maintenance of DNA methylation
Medtr4g122070	'27.1.3.7'	'RNA.processing.3' end processing.Fip1'	T
Medtr1g032630	'27.2'	'RNA.transcription'	it can promote turnover of viral RNAs in infected plants. Nomenclature according to Xie
Medtr4g064750	'27.2'	'RNA.transcription'	catalytic activity; INVOLVED IN: metabolic process; LOCATED IN: in 6 components; EXPRESSED IN: 21 plant structures; EXPRESSED DURING: 14 growth stages; CONTAINS InterPro DOMAIN/s: NAD(P)-binding domain (InterPro:IPR016040)
Medtr8g038990	'27.2'	'RNA.transcription'	RNA polymerase
Medtr8g065900	'27.2'	'RNA.transcription'	mitochondrial precursor (EC 2.7.7.6) (T7 bacteriophage-type single subunit RNA polymerase 1B) (NictaRpoT1-tom) - Nicotiana tabacum (Common tobacco) & (gnl|cdd|36256 : 1038.0) no description available & (at1g68990 : 1032.0) MGP3 (male gametophyte-defective 3) belongs to a small family of nuclear-encoded Phage type RNA polymerases (RPOTs) involved in the transcription of mitochondrial genes in Arab…
Medtr4g025900	'27.3.10'	'RNA.regulation of transcription.C2C2(Zn) YABBY family'	superfamily (InterPro:IPR009071)
Medtr0160s0030	'27.3.11'	'RNA.regulation of transcription.C2H2 zinc finger family'	zinc ion binding
Medtr1g067640	'27.3.11'	'RNA.regulation of transcription.C2H2 zinc finger family'	zinc ion binding
Medtr1g067650	'27.3.11'	'RNA.regulation of transcription.C2H2 zinc finger family'	zinc ion binding
Medtr4g059870	'27.3.11'	'RNA.regulation of transcription.C2H2 zinc finger family'	zinc ion binding
Medtr6g008210	'27.3.11'	'RNA.regulation of transcription.C2H2 zinc finger family'	response to chitin; LOCATED IN: cellular_component unknown; EXPRESSED IN: 12 plant structures; EXPRESSED DURING: 10 growth stages; CONTAINS InterPro DOMAIN/s: Zinc finger
Medtr1g109320	'27.3.12'	'RNA.regulation of transcription.C3H zinc finger family'	CCCH-type (InterPro:IPR000571); BEST Arabidopsis thaliana protein match is: Zinc finger C-x8-C-x5-C-x3-H type family protein (TAIR:AT1G66810.1); Has 1170 Blast hits to 1062 proteins in 230 species: Archae - 0; Bacteria - 0; Metazoa - 455; Fungi - 97; Plants - 305; Viruses - 0; Other Eukaryotes - 313 (source: NCBI BLink). & (reliability: 486.0) & (original description: no original description)'
Medtr3g103960	'27.3.12'	'RNA.regulation of transcription.C3H zinc finger family'	CCCH-type (InterPro:IPR000571); BEST Arabidopsis thaliana protein match is: CCCH-type zinc finger family protein (TAIR:AT2G19810.1); Has 726 Blast hits to 700 proteins in 125 species: Archae - 0; Bacteria - 0; Metazoa - 157; Fungi - 3; Plants - 406; Viruses - 0; Other Eukaryotes - 160 (source: NCBI BLink). & (gnl|cdd|36808 : 213.0) no description available & (reliability: 436.0) & (original descr…
Medtr5g071070	'27.3.12'	'RNA.regulation of transcription.C3H zinc finger family'	CCCH-type (InterPro:IPR000571)
Medtr6g090380	'27.3.12'	'RNA.regulation of transcription.C3H zinc finger family'	CCCH-type (InterPro:IPR000571); BEST Arabidopsis thaliana protein match is: CCCH-type zinc finger family protein (TAIR:AT2G19810.1); Has 726 Blast hits to 700 proteins in 125 species: Archae - 0; Bacteria - 0; Metazoa - 157; Fungi - 3; Plants - 406; Viruses - 0; Other Eukaryotes - 160 (source: NCBI BLink). & (gnl|cdd|36808 : 251.0) no description available & (reliability: 596.0) & (original descr…
Medtr5g095740	'27.3.15'	'RNA.regulation of transcription.CCAAT box binding factor family	'(at4g14540 : 210.0) "nuclear factor Y
Medtr1g053835	'27.3.20'	'RNA.regulation of transcription.G2-like transcription factor family	'(at5g06800 : 197.0) myb-like HTH transcriptional regulator family protein; CONTAINS InterPro DOMAIN/s: Homeodomain-like (InterPro:IPR009057)
Medtr1g093080	'27.3.20'	'RNA.regulation of transcription.G2-like transcription factor family	'(at1g68670 : 137.0) myb-like transcription factor family protein; CONTAINS InterPro DOMAIN/s: Homeodomain-like (InterPro:IPR009057)
Medtr2g090675	'27.3.20'	'RNA.regulation of transcription.G2-like transcription factor family	'(at2g20570 : 233.0) Encodes GLK1
Medtr4g078810	'27.3.20'	'RNA.regulation of transcription.G2-like transcription factor family	'(at2g20570 : 216.0) Encodes GLK1
Medtr2g089100	'27.3.21'	'RNA.regulation of transcription.GRAS transcription factor family'	T
Medtr3g065980	'27.3.21'	'RNA.regulation of transcription.GRAS transcription factor family'	a putative nuclear localization signal
Medtr1g101280	'27.3.22'	'RNA.regulation of transcription.HB	'(at4g00730 : 830.0) Encodes a homeodomain protein of the HD-GLABRA2 group. Involved in the accumulation of anthocyanin and in root development; ANTHOCYANINLESS 2 (ANL2); FUNCTIONS IN: transcription regulator activity
Medtr3g109800	'27.3.22'	'RNA.regulation of transcription.HB	'(at4g32880 : 1374.0) member of homeodomain-leucine zipper family
Medtr4g047800	'27.3.22'	'RNA.regulation of transcription.HB	'(at1g05230 : 1051.0) Encodes a homeobox-leucine zipper family protein belonging to the HD-ZIP IV family. Mutants have trichomes that appear glass-like under a dissecting microscope as compared to the wild-type trichomes. The mutations do not affect trichome growth or branch number.; homeodomain GLABROUS 2 (HDG2); FUNCTIONS IN: DNA binding
Medtr4g097600	'27.3.22'	'RNA.regulation of transcription.HB	'(at4g37790 : 229.0) Encodes homeobox protein HAT22
Medtr5g019650	'27.3.22'	'RNA.regulation of transcription.HB	'(at4g36740 : 162.0) Encodes a homeodomain leucine zipper class I (HD-Zip I) protein.; homeobox protein 40 (HB40); FUNCTIONS IN: DNA binding
Medtr5g019680	'27.3.22'	'RNA.regulation of transcription.HB	'(at4g36740 : 149.0) Encodes a homeodomain leucine zipper class I (HD-Zip I) protein.; homeobox protein 40 (HB40); FUNCTIONS IN: DNA binding
Medtr5g029320	'27.3.22'	'RNA.regulation of transcription.HB	'(at5g46880 : 784.0) homeobox-7 (HB-7); FUNCTIONS IN: DNA binding
Medtr8g006705	'27.3.22'	'RNA.regulation of transcription.HB	'(at3g60390 : 192.0) Encodes homeobox protein HAT3.; homeobox-leucine zipper protein 3 (HAT3); FUNCTIONS IN: sequence-specific DNA binding transcription factor activity; INVOLVED IN: regulation of transcription
Medtr6g464720	'27.3.24'	'RNA.regulation of transcription.MADS box transcription factor family'	binds K domain of AG in vivo; SEPALLATA 2 (SEP2); FUNCTIONS IN: protein binding
Medtr0140s0030	'27.3.25'	'RNA.regulation of transcription.MYB domain transcription factor family'	DNA-binding (InterPro:IPR001005)
Medtr1g085640	'27.3.25'	'RNA.regulation of transcription.MYB domain transcription factor family'	DNA-binding (InterPro:IPR001005)
Medtr2g011660	'27.3.25'	'RNA.regulation of transcription.MYB domain transcription factor family'	DNA-binding (InterPro:IPR001005)
Medtr3g065440	'27.3.25'	'RNA.regulation of transcription.MYB domain transcription factor family'	DNA-binding (InterPro:IPR001005)
Medtr3g101290	'27.3.25'	'RNA.regulation of transcription.MYB domain transcription factor family'	DNA-binding (InterPro:IPR001005)
Medtr4g082040	'27.3.25'	'RNA.regulation of transcription.MYB domain transcription factor family'	a MYB-domain transcription factor expressed in organ boundaries. Functions in boundary specification
Medtr4g102380	'27.3.25'	'RNA.regulation of transcription.MYB domain transcription factor family'	DNA-binding (InterPro:IPR001005)
Medtr5g010020	'27.3.25'	'RNA.regulation of transcription.MYB domain transcription factor family'	DNA-binding (InterPro:IPR001005)
Medtr5g010650	'27.3.25'	'RNA.regulation of transcription.MYB domain transcription factor family'	sequence-specific DNA binding transcription factor activity; INVOLVED IN: regulation of transcription
Medtr5g038910	'27.3.25'	'RNA.regulation of transcription.MYB domain transcription factor family'	loss of FLP activity results in a failure of guard mother cells (GMCs) to adopt the guard cell fate
Medtr5g078140	'27.3.25'	'RNA.regulation of transcription.MYB domain transcription factor family'	DNA-binding (InterPro:IPR001005)
Medtr5g079290	'27.3.25'	'RNA.regulation of transcription.MYB domain transcription factor family'	DNA-binding (InterPro:IPR001005)
Medtr6g012690	'27.3.25'	'RNA.regulation of transcription.MYB domain transcription factor family'	DNA-binding (InterPro:IPR001005)
Medtr6g074860	'27.3.25'	'RNA.regulation of transcription.MYB domain transcription factor family'	DNA-binding (InterPro:IPR001005)
Medtr7g061840	'27.3.25'	'RNA.regulation of transcription.MYB domain transcription factor family'	putative (At1g07540); TRF-like 2 (TRFL2); FUNCTIONS IN: DNA binding; INVOLVED IN: regulation of transcription; EXPRESSED IN: petal
Medtr8g027345	'27.3.25'	'RNA.regulation of transcription.MYB domain transcription factor family'	DNA-binding (InterPro:IPR001005)
Medtr8g098860	'27.3.25'	'RNA.regulation of transcription.MYB domain transcription factor family'	DNA-binding (InterPro:IPR001005)
Medtr3g111880	'27.3.26'	'RNA.regulation of transcription.MYB-related transcription factor family'	heat shock protein
Medtr5g020540	'27.3.26'	'RNA.regulation of transcription.MYB-related transcription factor family'	DNA-binding (InterPro:IPR001005)
Medtr5g027550	'27.3.26'	'RNA.regulation of transcription.MYB-related transcription factor family'	sequence-specific DNA binding transcription factor activity; INVOLVED IN: regulation of transcription; EXPRESSED IN: 20 plant structures; EXPRESSED DURING: 11 growth stages; CONTAINS InterPro DOMAIN/s: Molecular chaperone
Medtr8g077390	'27.3.26'	'RNA.regulation of transcription.MYB-related transcription factor family'	heat shock protein
Medtr8g077420	'27.3.26'	'RNA.regulation of transcription.MYB-related transcription factor family'	DNA-binding (InterPro:IPR001005)
Medtr7g105170	'27.3.27'	'RNA.regulation of transcription.NAC domain transcription factor family'	regulation of transcription; LOCATED IN: cellular_component unknown; EXPRESSED IN: 7 plant structures; EXPRESSED DURING: 8 growth stages; CONTAINS InterPro DOMAIN/s: No apical meristem (NAM) protein (InterPro:IPR003441); BEST Arabidopsis thaliana protein match is: NAC domain containing protein 61 (TAIR:AT3G44350.2); Has 2731 Blast hits to 2726 proteins in 73 species: Archae - 0; Bacteria - 0; Met…
Medtr8g099750	'27.3.27'	'RNA.regulation of transcription.NAC domain transcription factor family'	T
Medtr8g463380	'27.3.29'	'RNA.regulation of transcription.TCP transcription factor family'	sequence-specific DNA binding transcription factor activity; INVOLVED IN: in 6 processes; LOCATED IN: cellular_component unknown; EXPRESSED IN: 19 plant structures; EXPRESSED DURING: 12 growth stages; CONTAINS InterPro DOMAIN/s: Transcription factor
Medtr1g023170	'27.3.3'	'RNA.regulation of transcription.AP2/EREBP	'(at1g75490 : 134.0) encodes a member of the DREB subfamily A-2 of ERF/AP2 transcription factor family. The protein contains one AP2 domain. There are eight members in this subfamily including DREB2A AND DREB2B that are involved in response to drought.; Integrase-type DNA-binding superfamily protein; CONTAINS InterPro DOMAIN/s: DNA-binding
Medtr5g009410	'27.3.3'	'RNA.regulation of transcription.AP2/EREBP	'(at1g64380 : 152.0) encodes a member of the DREB subfamily A-6 of ERF/AP2 transcription factor family. The protein contains one AP2 domain. There are 8 members in this subfamily including RAP2.4.; Integrase-type DNA-binding superfamily protein; CONTAINS InterPro DOMAIN/s: DNA-binding
Medtr7g055857	'27.3.3'	'RNA.regulation of transcription.AP2/EREBP	'(at4g13040 : 122.0) Integrase-type DNA-binding superfamily protein; FUNCTIONS IN: DNA binding
Medtr7g085810	'27.3.3'	'RNA.regulation of transcription.AP2/EREBP	'(at5g19790 : 128.0) encodes a member of the ERF (ethylene response factor) subfamily B-6 of ERF/AP2 transcription factor family (RAP2.11). The protein contains one AP2 domain. There are 12 members in this subfamily including RAP2.11.; related to AP2 11 (RAP2.11); FUNCTIONS IN: DNA binding
Medtr7g117690	'27.3.3'	'RNA.regulation of transcription.AP2/EREBP	'(at1g01250 : 173.0) encodes a member of the DREB subfamily A-4 of ERF/AP2 transcription factor family. The protein contains one AP2 domain. There are 17 members in this subfamily including TINY.; Integrase-type DNA-binding superfamily protein; FUNCTIONS IN: DNA binding
Medtr8g012655	'27.3.3'	'RNA.regulation of transcription.AP2/EREBP	'(at4g13040 : 105.0) Integrase-type DNA-binding superfamily protein; FUNCTIONS IN: DNA binding
Medtr8g027465	'27.3.3'	'RNA.regulation of transcription.AP2/EREBP	'(at1g01250 : 142.0) encodes a member of the DREB subfamily A-4 of ERF/AP2 transcription factor family. The protein contains one AP2 domain. There are 17 members in this subfamily including TINY.; Integrase-type DNA-binding superfamily protein; FUNCTIONS IN: DNA binding
Medtr1g060990	'27.3.30'	'RNA.regulation of transcription.Trihelix	'(at5g03680 : 278.0) Recessive mutations are defective in organ initiation and orientation in the second whorl. This gene encodes a trihelix transcription factor whose expression is limited to margins of floral and vegetative organs. Overexpression and double mutant analyses suggest that this gene is involved in limiting lateral growth of organs.; PETAL LOSS (PTL); CONTAINS InterPro DOMAIN/s: SANT
Medtr1g013760	'27.3.32'	'RNA.regulation of transcription.WRKY domain transcription factor family'	WRKY40
Medtr1g013790	'27.3.32'	'RNA.regulation of transcription.WRKY domain transcription factor family'	WRKY40
Medtr1g015140	'27.3.32'	'RNA.regulation of transcription.WRKY domain transcription factor family'	T
Medtr2g075690	'27.3.32'	'RNA.regulation of transcription.WRKY domain transcription factor family'	T
Medtr3g093830	'27.3.32'	'RNA.regulation of transcription.WRKY domain transcription factor family'	T
Medtr3g095040	'27.3.32'	'RNA.regulation of transcription.WRKY domain transcription factor family'	T
Medtr4g094908	'27.3.32'	'RNA.regulation of transcription.WRKY domain transcription factor family'	Transcription factor
Medtr5g016610	'27.3.32'	'RNA.regulation of transcription.WRKY domain transcription factor family'	Transcription factor
Medtr5g067680	'27.3.32'	'RNA.regulation of transcription.WRKY domain transcription factor family'	T
Medtr7g073380	'27.3.32'	'RNA.regulation of transcription.WRKY domain transcription factor family'	T
Medtr7g073430	'27.3.32'	'RNA.regulation of transcription.WRKY domain transcription factor family'	T
Medtr7g079040	'27.3.32'	'RNA.regulation of transcription.WRKY domain transcription factor family'	T
Medtr7g117200	'27.3.32'	'RNA.regulation of transcription.WRKY domain transcription factor family'	DNA-dependent
Medtr8g005750	'27.3.32'	'RNA.regulation of transcription.WRKY domain transcription factor family'	T
Medtr8g027860	'27.3.32'	'RNA.regulation of transcription.WRKY domain transcription factor family'	DNA binding
Medtr8g092010	'27.3.32'	'RNA.regulation of transcription.WRKY domain transcription factor family'	T
Medtr1g061220	'27.3.34'	'RNA.regulation of transcription.Orphan family'	an increase in methylation is observed in a number of gene promoters. Among the loci affected by ros1
Medtr1g492760	'27.3.34'	'RNA.regulation of transcription.Orphan family'	Endonuclease III-like
Medtr2g078360	'27.3.35'	'RNA.regulation of transcription.bZIP transcription factor family'	transcription activator activity
Medtr2g090900	'27.3.35'	'RNA.regulation of transcription.bZIP transcription factor family'	transcription activator activity
Medtr3g467120	'27.3.35'	'RNA.regulation of transcription.bZIP transcription factor family'	sequence-specific DNA binding transcription factor activity; INVOLVED IN: regulation of transcription
Medtr4g079500	'27.3.35'	'RNA.regulation of transcription.bZIP transcription factor family'	transcription activator activity
Medtr5g075390	'27.3.35'	'RNA.regulation of transcription.bZIP transcription factor family'	sequence-specific DNA binding transcription factor activity; INVOLVED IN: regulation of transcription
Medtr7g115120	'27.3.35'	'RNA.regulation of transcription.bZIP transcription factor family'	partial cds; BZO2H3; FUNCTIONS IN: DNA binding
Medtr3g083300	'27.3.36'	'RNA.regulation of transcription.Argonaute'	and for DNA methylation and transcriptional gene silencing.; ARGONAUTE 6 (AGO6); CONTAINS InterPro DOMAIN/s: Domain of unknown function DUF1785 (InterPro:IPR014811)
Medtr1g106420	'27.3.37'	'RNA.regulation of transcription.AS2	'(at3g49940 : 170.0) LOB domain-containing protein 38 (LBD38); CONTAINS InterPro DOMAIN/s: Lateral organ boundaries
Medtr8g027440	'27.3.4'	'RNA.regulation of transcription.ARF	'(at4g23980 : 602.0) Encodes auxin response factor 9 (ARF9).; auxin response factor 9 (ARF9); FUNCTIONS IN: sequence-specific DNA binding transcription factor activity; INVOLVED IN: regulation of transcription
Medtr1g076270	'27.3.40'	'RNA.regulation of transcription.Aux/IAA family'	and has been shown to be phosphorylated by oat phytochrome A in vitro.; SHORT HYPOCOTYL 2 (SHY2); FUNCTIONS IN: sequence-specific DNA binding transcription factor activity; INVOLVED IN: response to auxin stimulus
Medtr1g093240	'27.3.40'	'RNA.regulation of transcription.Aux/IAA family'	AUX/IAA protein (InterPro:IPR003311); BEST Arabidopsis thaliana protein match is: indole-3-acetic acid 7 (TAIR:AT3G23050.1); Has 30201 Blast hits to 17322 proteins in 780 species: Archae - 12; Bacteria - 1396; Metazoa - 17338; Fungi - 3422; Plants - 5037; Viruses - 0; Other Eukaryotes - 2996 (source: NCBI BLink). & (p13089|aux28_soybn : 255.0) Auxin-induced protein AUX28 - Glycine max (Soybean) &…
Medtr1g093350	'27.3.40'	'RNA.regulation of transcription.Aux/IAA family'	and has been shown to be phosphorylated by oat phytochrome A in vitro.; SHORT HYPOCOTYL 2 (SHY2); FUNCTIONS IN: sequence-specific DNA binding transcription factor activity; INVOLVED IN: response to auxin stimulus
Medtr4g011880	'27.3.40'	'RNA.regulation of transcription.Aux/IAA family'	gravitropism
Medtr3g089140	'27.3.44'	'RNA.regulation of transcription.Chromatin Remodeling Factors'	T
Medtr7g089190	'27.3.44'	'RNA.regulation of transcription.Chromatin Remodeling Factors'	RING-type
Medtr5g023660	'27.3.46'	'RNA.regulation of transcription.DNA methyltransferases'	DNA binding; INVOLVED IN: DNA mediated transformation
Medtr5g036480	'27.3.5'	'RNA.regulation of transcription.ARR'	Signal transduction response regulator
Medtr1g017490	'27.3.50'	'RNA.regulation of transcription.General Transcription'	containing nuclear targeting domain. Mutants result in smaller leaves indicating the role of the gene in leaf development. Expressed in root
Medtr5g009920	'27.3.50'	'RNA.regulation of transcription.General Transcription'	MIZ-type (InterPro:IPR004181); BEST Arabidopsis thaliana protein match is: zinc ion binding;zinc ion binding (TAIR:AT1G08910.1); Has 2409 Blast hits to 1813 proteins in 283 species: Archae - 4; Bacteria - 96; Metazoa - 1110; Fungi - 536; Plants - 146; Viruses - 31; Other Eukaryotes - 486 (source: NCBI BLink). & (gnl|cdd|37380 : 102.0) no description available & (gnl|cdd|66556 : 84.1) no descripti…
Medtr4g132540	'27.3.57'	'RNA.regulation of transcription.JUMONJI family'	zinc ion binding; EXPRESSED IN: 22 plant structures; EXPRESSED DURING: 14 growth stages; CONTAINS InterPro DOMAIN/s: Transcription factor jumonji/aspartyl beta-hydroxylase (InterPro:IPR003347)
Medtr5g029370	'27.3.57'	'RNA.regulation of transcription.JUMONJI family'	regulation of transcription; LOCATED IN: nucleus; EXPRESSED IN: 24 plant structures; EXPRESSED DURING: 14 growth stages; CONTAINS InterPro DOMAIN/s: Transcription factor jumonji/aspartyl beta-hydroxylase (InterPro:IPR003347)
Medtr2g014020	'27.3.58'	'RNA.regulation of transcription.LUG'	gynoecium and ovule development. Negatively regulates AGAMOUS . Encodes a glutamine-rich protein with seven WD repeats similar to transcriptional corepressors.; LEUNIG (LUG); FUNCTIONS IN: transcription repressor activity
Medtr1g017350	'27.3.6'	'RNA.regulation of transcription.bHLH	'(at1g10120 : 202.0) basic helix-loop-helix (bHLH) DNA-binding superfamily protein; FUNCTIONS IN: DNA binding
Medtr1g094085	'27.3.6'	'RNA.regulation of transcription.bHLH	'(at1g31050 : 140.0) basic helix-loop-helix (bHLH) DNA-binding superfamily protein; FUNCTIONS IN: sequence-specific DNA binding transcription factor activity; INVOLVED IN: regulation of transcription; LOCATED IN: nucleus; EXPRESSED IN: sperm cell
Medtr2g033880	'27.3.6'	'RNA.regulation of transcription.bHLH	'(at3g17100 : 116.0) sequence-specific DNA binding transcription factors; FUNCTIONS IN: sequence-specific DNA binding transcription factor activity; INVOLVED IN: regulation of transcription; LOCATED IN: chloroplast; EXPRESSED IN: 22 plant structures; EXPRESSED DURING: 13 growth stages; BEST Arabidopsis thaliana protein match is: basic helix-loop-helix (bHLH) DNA-binding superfamily protein (TAIR:…
Medtr2g039620	'27.3.6'	'RNA.regulation of transcription.bHLH	'(at5g56960 : 179.0) basic helix-loop-helix (bHLH) DNA-binding family protein; FUNCTIONS IN: DNA binding
Medtr2g104560	'27.3.6'	'RNA.regulation of transcription.bHLH	'(at4g37850 : 117.0) basic helix-loop-helix (bHLH) DNA-binding superfamily protein; FUNCTIONS IN: DNA binding
Medtr3g027650	'27.3.6'	'RNA.regulation of transcription.bHLH	'(at2g42280 : 124.0) basic helix-loop-helix (bHLH) DNA-binding superfamily protein; BEST Arabidopsis thaliana protein match is: basic helix-loop-helix (bHLH) DNA-binding superfamily protein (TAIR:AT1G51140.1); Has 35333 Blast hits to 34131 proteins in 2444 species: Archae - 798; Bacteria - 22429; Metazoa - 974; Fungi - 991; Plants - 531; Viruses - 0; Other Eukaryotes - 9610 (source: NCBI BLink). …
Medtr3g028520	'27.3.6'	'RNA.regulation of transcription.bHLH	'(at2g42280 : 141.0) basic helix-loop-helix (bHLH) DNA-binding superfamily protein; BEST Arabidopsis thaliana protein match is: basic helix-loop-helix (bHLH) DNA-binding superfamily protein (TAIR:AT1G51140.1); Has 35333 Blast hits to 34131 proteins in 2444 species: Archae - 798; Bacteria - 22429; Metazoa - 974; Fungi - 991; Plants - 531; Viruses - 0; Other Eukaryotes - 9610 (source: NCBI BLink). …
Medtr6g047570	'27.3.6'	'RNA.regulation of transcription.bHLH	'(at2g22760 : 112.0) basic helix-loop-helix (bHLH) DNA-binding superfamily protein; FUNCTIONS IN: DNA binding
Medtr8g036235	'27.3.6'	'RNA.regulation of transcription.bHLH	'(at2g42280 : 109.0) basic helix-loop-helix (bHLH) DNA-binding superfamily protein; BEST Arabidopsis thaliana protein match is: basic helix-loop-helix (bHLH) DNA-binding superfamily protein (TAIR:AT1G51140.1); Has 35333 Blast hits to 34131 proteins in 2444 species: Archae - 798; Bacteria - 22429; Metazoa - 974; Fungi - 991; Plants - 531; Viruses - 0; Other Eukaryotes - 9610 (source: NCBI BLink). …
Medtr8g066770	'27.3.6'	'RNA.regulation of transcription.bHLH	'(at1g72210 : 209.0) basic helix-loop-helix (bHLH) DNA-binding superfamily protein; FUNCTIONS IN: DNA binding
Medtr3g114920	'27.3.62'	'RNA.regulation of transcription.Nucleosome/chromatin assembly factor group'	nucleus; EXPRESSED IN: 21 plant structures; EXPRESSED DURING: 14 growth stages; CONTAINS InterPro DOMAIN/s: High mobility group
Medtr3g103110	'27.3.63'	'RNA.regulation of transcription.PHD finger transcription factor'	putative; FUNCTIONS IN: RNA binding
Medtr3g464550	'27.3.63'	'RNA.regulation of transcription.PHD finger transcription factor'	putative; FUNCTIONS IN: RNA binding
Medtr1g056910	'27.3.64'	'RNA.regulation of transcription.PHOR1'	binding; INVOLVED IN: respiratory burst involved in defense response
Medtr1g017950	'27.3.67'	'RNA.regulation of transcription.putative transcription regulator'	zinc ion binding; INVOLVED IN: biological_process unknown; LOCATED IN: plasma membrane; EXPRESSED IN: 23 plant structures; EXPRESSED DURING: 13 growth stages; CONTAINS InterPro DOMAIN/s: Zinc finger
Medtr1g037630	'27.3.67'	'RNA.regulation of transcription.putative transcription regulator'	plant-type cell wall; EXPRESSED IN: 23 plant structures; EXPRESSED DURING: 13 growth stages; CONTAINS InterPro DOMAIN/s: Peptidase aspartic
Medtr1g061530	'27.3.67'	'RNA.regulation of transcription.putative transcription regulator'	nucleolus
Medtr1g090853	'27.3.67'	'RNA.regulation of transcription.putative transcription regulator'	T
Medtr3g014290	'27.3.67'	'RNA.regulation of transcription.putative transcription regulator'	plant-type cell wall; EXPRESSED IN: 23 plant structures; EXPRESSED DURING: 13 growth stages; CONTAINS InterPro DOMAIN/s: Peptidase aspartic
Medtr3g064300	'27.3.67'	'RNA.regulation of transcription.putative transcription regulator'	zinc ion binding; INVOLVED IN: histone modification
Medtr3g104940	'27.3.67'	'RNA.regulation of transcription.putative transcription regulator'	membrane; EXPRESSED IN: 26 plant structures; EXPRESSED DURING: 13 growth stages; CONTAINS InterPro DOMAIN/s: Membrane protein
Medtr6g069570	'27.3.67'	'RNA.regulation of transcription.putative transcription regulator'	cell wall; EXPRESSED IN: 22 plant structures; EXPRESSED DURING: 13 growth stages; CONTAINS InterPro DOMAIN/s: Pre-mRNA processing ribonucleoprotein
Medtr8g080180	'27.3.67'	'RNA.regulation of transcription.putative transcription regulator'	C-terminal (InterPro:IPR005516); BEST Arabidopsis thaliana protein match is: Remorin family protein (TAIR:AT2G02170.2); Has 35333 Blast hits to 34131 proteins in 2444 species: Archae - 798; Bacteria - 22429; Metazoa - 974; Fungi - 991; Plants - 531; Viruses - 0; Other Eukaryotes - 9610 (source: NCBI BLink). & (gnl|cdd|67381 : 103.0) no description available & (reliability: 426.0) & (original desc…
Medtr5g027020	'27.3.69'	'RNA.regulation of transcription.SET-domain transcriptional regulator family'	T
Medtr4g128930	'27.3.7'	'RNA.regulation of transcription.C2C2(Zn) CO-like	'(at5g57660 : 317.0) CONSTANS-like 5 (COL5); FUNCTIONS IN: sequence-specific DNA binding transcription factor activity
Medtr8g104190	'27.3.7'	'RNA.regulation of transcription.C2C2(Zn) CO-like	'(at1g25440 : 228.0) B-box type zinc finger protein with CCT domain; FUNCTIONS IN: sequence-specific DNA binding transcription factor activity
Medtr3g077750	'27.3.8'	'RNA.regulation of transcription.C2C2(Zn) DOF zinc finger family'	Dof-type (InterPro:IPR003851); BEST Arabidopsis thaliana protein match is: TARGET OF MONOPTEROS 6 (TAIR:AT5G60200.1); Has 1915 Blast hits to 1778 proteins in 135 species: Archae - 0; Bacteria - 49; Metazoa - 135; Fungi - 61; Plants - 1116; Viruses - 0; Other Eukaryotes - 554 (source: NCBI BLink). & (gnl|cdd|66392 : 121.0) no description available & (o24463|pbf_maize : 109.0) Dof zinc finger prote…
Medtr4g082060	'27.3.8'	'RNA.regulation of transcription.C2C2(Zn) DOF zinc finger family'	identical to H-protein promoter binding factor-2a GI:3386546 from (Arabidopsis thaliana). Interacts with LKP2 and FKF1
Medtr6g073013	'27.3.80'	'RNA.regulation of transcription.zf-HD'	ZF-HD class (InterPro:IPR006455)
Medtr4g052040	'27.3.89'	'RNA.regulation of transcription.ovate family OFP'	T
Medtr5g075210	'27.3.89'	'RNA.regulation of transcription.ovate family OFP'	T
Medtr7g105780	'27.3.89'	'RNA.regulation of transcription.ovate family OFP'	T
Medtr8g087530	'27.3.89'	'RNA.regulation of transcription.ovate family OFP'	T
Medtr8g103520	'27.3.89'	'RNA.regulation of transcription.ovate family OFP'	T
Medtr1g094930	'27.3.9'	'RNA.regulation of transcription.C2C2(Zn) GATA transcription factor family'	NHR/GATA-type (InterPro:IPR013088)
Medtr2g038720	'27.3.9'	'RNA.regulation of transcription.C2C2(Zn) GATA transcription factor family'	NHR/GATA-type (InterPro:IPR013088)
Medtr6g032830	'27.3.9'	'RNA.regulation of transcription.C2C2(Zn) GATA transcription factor family'	NHR/GATA-type (InterPro:IPR013088)
Medtr7g085410	'27.3.9'	'RNA.regulation of transcription.C2C2(Zn) GATA transcription factor family'	NHR/GATA-type (InterPro:IPR013088)
Medtr0036s0050	'27.3.99'	'RNA.regulation of transcription.unclassified'	Peptidase aspartic
Medtr0036s0070	'27.3.99'	'RNA.regulation of transcription.unclassified'	Peptidase aspartic
Medtr1g019280	'27.3.99'	'RNA.regulation of transcription.unclassified'	C-terminal (InterPro:IPR005516); BEST Arabidopsis thaliana protein match is: Remorin family protein (TAIR:AT4G36970.1); Has 35333 Blast hits to 34131 proteins in 2444 species: Archae - 798; Bacteria - 22429; Metazoa - 974; Fungi - 991; Plants - 531; Viruses - 0; Other Eukaryotes - 9610 (source: NCBI BLink). & (gnl|cdd|67381 : 103.0) no description available & (reliability: 596.0) & (original desc…
Medtr1g072260	'27.3.99'	'RNA.regulation of transcription.unclassified'	poly(U) RNA binding; INVOLVED IN: rRNA processing; LOCATED IN: in 6 components; EXPRESSED IN: 25 plant structures; EXPRESSED DURING: 15 growth stages; CONTAINS InterPro DOMAIN/s: NAD-dependent epimerase/dehydratase (InterPro:IPR001509)
Medtr2g028190	'27.3.99'	'RNA.regulation of transcription.unclassified'	aspartic-type endopeptidase activity; INVOLVED IN: proteolysis; EXPRESSED IN: 12 plant structures; EXPRESSED DURING: 4 anthesis
Medtr2g080950	'27.3.99'	'RNA.regulation of transcription.unclassified'	A thaliana has 15 members
Medtr3g025900	'27.3.99'	'RNA.regulation of transcription.unclassified'	putative exocyst subunits
Medtr3g053710	'27.3.99'	'RNA.regulation of transcription.unclassified'	aspartic-type endopeptidase activity; INVOLVED IN: proteolysis; EXPRESSED IN: 12 plant structures; EXPRESSED DURING: 4 anthesis
Medtr3g065160	'27.3.99'	'RNA.regulation of transcription.unclassified'	Peptidase aspartic
Medtr3g108220	'27.3.99'	'RNA.regulation of transcription.unclassified'	T
Medtr3g115950	'27.3.99'	'RNA.regulation of transcription.unclassified'	DHHC-type (InterPro:IPR001594); BEST Arabidopsis thaliana protein match is: DHHC-type zinc finger family protein (TAIR:AT3G22180.1); Has 30201 Blast hits to 17322 proteins in 780 species: Archae - 12; Bacteria - 1396; Metazoa - 17338; Fungi - 3422; Plants - 5037; Viruses - 0; Other Eukaryotes - 2996 (source: NCBI BLink). & (gnl|cdd|36525 : 139.0) no description available & (gnl|cdd|65336 : 89.2) …
Medtr4g035550	'27.3.99'	'RNA.regulation of transcription.unclassified'	zinc ion binding; INVOLVED IN: regulation of transcription
Medtr5g008900	'27.3.99'	'RNA.regulation of transcription.unclassified'	zinc ion binding
Medtr5g030130	'27.3.99'	'RNA.regulation of transcription.unclassified'	T
Medtr5g077850	'27.3.99'	'RNA.regulation of transcription.unclassified'	Peptidase aspartic
Medtr5g081160	'27.3.99'	'RNA.regulation of transcription.unclassified'	LIM-type (InterPro:IPR001781)
Medtr6g085010	'27.3.99'	'RNA.regulation of transcription.unclassified'	Peptidase aspartic
Medtr7g088350	'27.3.99'	'RNA.regulation of transcription.unclassified'	DHHC-type (InterPro:IPR001594); BEST Arabidopsis thaliana protein match is: DHHC-type zinc finger family protein (TAIR:AT5G05070.1). & (gnl|cdd|36525 : 223.0) no description available & (gnl|cdd|34870 : 119.0) no description available & (reliability: 924.0) & (original description: no original description)'
Medtr8g079482	'27.3.99'	'RNA.regulation of transcription.unclassified'	C-terminal (InterPro:IPR005516); BEST Arabidopsis thaliana protein match is: Remorin family protein (TAIR:AT2G02170.2); Has 12397 Blast hits to 7447 proteins in 1066 species: Archae - 25; Bacteria - 2897; Metazoa - 2750; Fungi - 978; Plants - 862; Viruses - 38; Other Eukaryotes - 4847 (source: NCBI BLink). & (gnl|cdd|67381 : 98.9) no description available & (reliability: 642.0) & (original descri…
Medtr8g090235	'27.3.99'	'RNA.regulation of transcription.unclassified'	T
Medtr8g105930	'27.3.99'	'RNA.regulation of transcription.unclassified'	Zinc finger
Medtr3g062640	'27.4'	'RNA.RNA binding'	nucleic acid binding; INVOLVED IN: biological_process unknown; LOCATED IN: cellular_component unknown; EXPRESSED IN: 23 plant structures; EXPRESSED DURING: 13 growth stages; CONTAINS InterPro DOMAIN/s: K Homology (InterPro:IPR004087)
Medtr5g064120	'27.4'	'RNA.RNA binding'	nucleotide binding
Medtr8g024520	'27.4'	'RNA.RNA binding'	nucleotide binding
Medtr1g008600	'28.1'	'DNA.synthesis/chromatin structure'	which prevent spontaneous or DNA damage-induced production of DNA double strand breaks. Two conserved functional domains: an N-terminal superfamily II DNA/RNA helicase domain and a C-terminal prokaryotic-type DNA polymerase I domain. Required for regulated cell division and differentiation in meristems. Mutant plants show morphological defects
Medtr1g063940	'28.1'	'DNA.synthesis/chromatin structure'	DNA-binding (InterPro:IPR001005)
Medtr1g070170	'28.1'	'DNA.synthesis/chromatin structure'	cyclin-dependent protein kinase activity; INVOLVED IN: chloroplast organization
Medtr1g089630	'28.1'	'DNA.synthesis/chromatin structure'	T
Medtr1g103160	'28.1'	'DNA.synthesis/chromatin structure'	T
Medtr3g113050	'28.1'	'DNA.synthesis/chromatin structure'	Forkhead-associated (FHA) domain (InterPro:IPR000253); BEST Arabidopsis thaliana protein match is: Forkhead-associated (FHA) domain-containing protein (TAIR:AT1G75530.1); Has 387 Blast hits to 260 proteins in 92 species: Archae - 0; Bacteria - 0; Metazoa - 229; Fungi - 23; Plants - 94; Viruses - 0; Other Eukaryotes - 41 (source: NCBI BLink). & (gnl|cdd|37504 : 193.0) no description available & (r…
Medtr4g104350	'28.1'	'DNA.synthesis/chromatin structure'	DNA binding
Medtr4g118720	'28.1'	'DNA.synthesis/chromatin structure'	full-length and truncated
Medtr4g122270	'28.1'	'DNA.synthesis/chromatin structure'	a protein essential to embryo development. Overexpression results in altered root meristem function.; MINICHROMOSOME MAINTENANCE 2 (MCM2); FUNCTIONS IN: DNA-dependent ATPase activity
Medtr5g006520	'28.1'	'DNA.synthesis/chromatin structure'	T
Medtr5g006820	'28.1'	'DNA.synthesis/chromatin structure'	inositol trisphosphate phosphatase activity; INVOLVED IN: in 8 processes; LOCATED IN: cellular_component unknown; EXPRESSED IN: 22 plant structures; EXPRESSED DURING: 8 growth stages; CONTAINS InterPro DOMAIN/s: Inositol polyphosphate related phosphatase (InterPro:IPR000300)
Medtr5g027390	'28.1'	'DNA.synthesis/chromatin structure'	nucleic acid binding; INVOLVED IN: DNA repair
Medtr5g076380	'28.1'	'DNA.synthesis/chromatin structure'	seed; EXPRESSED DURING: E expanded cotyledon stage; BEST Arabidopsis thaliana protein match is: P-loop containing nucleoside triphosphate hydrolases superfamily protein (TAIR:AT1G65780.1). & (gnl|cdd|37012 : 468.0) no description available & (gnl|cdd|31309 : 144.0) no description available & (reliability: 1346.0) & (original description: no original description)'
Medtr6g068790	'28.1'	'DNA.synthesis/chromatin structure'	mitochondrial precursor (PPR protein) (Fertility restorer) (Restorer for CMS) - Oryza sativa (Rice) & (reliability: 702.0) & (original description: no original description)'
Medtr7g066880	'28.1'	'DNA.synthesis/chromatin structure'	DNA topoisomerase (ATP-hydrolyzing) activity
Medtr7g095260	'28.1'	'DNA.synthesis/chromatin structure'	inositol or phosphatidylinositol phosphatase activity; INVOLVED IN: biological_process unknown; LOCATED IN: cellular_component unknown; EXPRESSED IN: 10 plant structures; EXPRESSED DURING: 4 anthesis
Medtr7g110100	'28.1'	'DNA.synthesis/chromatin structure'	OB-fold-like protein; CONTAINS InterPro DOMAIN/s: Nucleic acid-binding
Medtr8g086640	'28.1.3.2.1'	'DNA.synthesis/chromatin structure.histone.core.H2A'	a histone H2A protein.; histone H2A 12 (HTA12); FUNCTIONS IN: DNA binding; INVOLVED IN: nucleosome assembly; LOCATED IN: nucleus
Medtr0009s0230	'28.2'	'DNA.repair'	catalytic activity; INVOLVED IN: DNA repair
Medtr3g027940	'28.2'	'DNA.repair'	defense response; LOCATED IN: apoplast
Medtr8g066040	'28.2'	'DNA.repair'	catalytic activity; INVOLVED IN: DNA repair
Medtr8g447000	'28.2'	'DNA.repair'	catalytic activity; INVOLVED IN: DNA repair
Medtr1g423960	'28.99'	'DNA.unspecified'	nucleic acid binding; LOCATED IN: intracellular; EXPRESSED IN: 22 plant structures; EXPRESSED DURING: 13 growth stages; CONTAINS InterPro DOMAIN/s: Exonuclease (InterPro:IPR006055)
Medtr4g118760	'28.99'	'DNA.unspecified'	endoplasmic reticulum membrane; EXPRESSED IN: cultured cell; CONTAINS InterPro DOMAIN/s: PapD-like (InterPro:IPR008962)
Medtr5g083730	'28.99'	'DNA.unspecified'	acting on ester bonds
Medtr3g095790	'29.1'	'protein.aa activation'	an electron transport chain inhibitor.; cytochrome c oxidase 15 (COX15); FUNCTIONS IN: molecular_function unknown; INVOLVED IN: protein complex assembly; LOCATED IN: membrane; EXPRESSED IN: 21 plant structures; EXPRESSED DURING: 13 growth stages; CONTAINS InterPro DOMAIN/s: Cytochrome oxidase assembly (InterPro:IPR003780); Has 1807 Blast hits to 1807 proteins in 277 species: Archae - 0; Bacteria …
Medtr3g006740	'29.1.14'	'protein.aa activation.glycine-tRNA ligase'	nucleotide binding
Medtr7g006450	'29.1.4'	'protein.aa activation.leucine-tRNA ligase'	aminoacyl-tRNA ligase activity
Medtr4g074670	'29.1.7'	'protein.aa activation.alanine-tRNA ligase'	ligase activity
Medtr3g035610	'29.2.1.1.1.1.14'	'protein.synthesis.ribosomal protein.prokaryotic.chloroplast.30S subunit.S14'	chloroplast; EXPRESSED IN: 22 plant structures; EXPRESSED DURING: 13 growth stages; CONTAINS InterPro DOMAIN/s: Ribosomal protein S14 (InterPro:IPR001209)
Medtr3g092720	'29.2.1.1.1.1.530'	'protein.synthesis.ribosomal protein.prokaryotic.chloroplast.30S subunit.S30A'	putative; FUNCTIONS IN: structural constituent of ribosome
Medtr1g093060	'29.2.1.1.1.2.3'	'protein.synthesis.ribosomal protein.prokaryotic.chloroplast.50S subunit.L3'	Ribosomal protein L3
Medtr8g104270	'29.2.1.2.2.34'	'protein.synthesis.ribosomal protein.eukaryotic.60S subunit.L34'	ribosome
Medtr4g082590	'29.2.1.99.99'	'protein.synthesis.ribosomal protein.unknown.unknown'	plant (InterPro:IPR016804)
Medtr8g018890	'29.2.2'	'protein.synthesis.ribosome biogenesis'	ATPase activity
Medtr4g056430	'29.2.3'	'protein.synthesis.initiation'	Stem cell self-renewal protein Piwi (InterPro:IPR003165)
Medtr1g101870	'29.2.4'	'protein.synthesis.elongation'	translation elongation factor activity; INVOLVED IN: translational elongation; LOCATED IN: mitochondrion
Medtr2g069320	'29.2.4'	'protein.synthesis.elongation'	nucleic acid binding
Medtr3g090440	'29.3.1'	'protein.targeting.nucleus'	protein import into nucleus; LOCATED IN: chloroplast thylakoid membrane
Medtr1g081230	'29.3.2'	'protein.targeting.mitochondria'	P-P-bond-hydrolysis-driven protein transmembrane transporter activity; INVOLVED IN: intracellular protein transport
Medtr2g096900	'29.3.3'	'protein.targeting.chloroplast'	a 16-KDa plastid outer membrane protein involved in plastid import of protochlorophyllide oxidoreductase A. Predominantly expressed in leaves and is also inducible by cold treatment.; outer plastid envelope protein 16-1 (OEP16-1); FUNCTIONS IN: protein transporter activity
Medtr2g097700	'29.3.3'	'protein.targeting.chloroplast'	chloroplast precursor (75 kDa translocon at the outer-envelope-membrane of chloroplasts) (Import intermediate associated protein of 75 kDa) (75 kDa chloroplast outer envelope protein) - Pisum sativum (Garden pea) & (at3g46740 : 1112.0) Component of the translocon outer membrane (TOC) complex. Forms the outer envelope translocation channel (beta-barrel). Plays a role in preprotein conductance. Imp…
Medtr2g437910	'29.3.4.3'	'protein.targeting.secretory pathway.vacuole'	Golgi transport complex; EXPRESSED IN: 20 plant structures; EXPRESSED DURING: 10 growth stages; CONTAINS InterPro DOMAIN/s: Protease-associated PA (InterPro:IPR003137)
Medtr3g117090	'29.3.4.99'	'protein.targeting.secretory pathway.unspecified'	transport; LOCATED IN: intracellular; EXPRESSED IN: 25 plant structures; EXPRESSED DURING: 17 growth stages; CONTAINS InterPro DOMAIN/s: Cellular retinaldehyde-binding/triple function
Medtr4g133440	'29.3.4.99'	'protein.targeting.secretory pathway.unspecified'	transporter activity; INVOLVED IN: transport; LOCATED IN: cellular_component unknown; EXPRESSED IN: 23 plant structures; EXPRESSED DURING: 13 growth stages; CONTAINS InterPro DOMAIN/s: Cellular retinaldehyde-binding/triple function
Medtr5g062310	'29.3.4.99'	'protein.targeting.secretory pathway.unspecified'	C-terminal (InterPro:IPR001251); BEST Arabidopsis thaliana protein match is: Sec14p-like phosphatidylinositol transfer family protein (TAIR:AT4G08690.1); Has 35333 Blast hits to 34131 proteins in 2444 species: Archae - 798; Bacteria - 22429; Metazoa - 974; Fungi - 991; Plants - 531; Viruses - 0; Other Eukaryotes - 9610 (source: NCBI BLink). & (gnl|cdd|36683 : 281.0) no description available & (gn…
Medtr6g015645	'29.3.4.99'	'protein.targeting.secretory pathway.unspecified'	transport; LOCATED IN: intracellular; EXPRESSED IN: 25 plant structures; EXPRESSED DURING: 17 growth stages; CONTAINS InterPro DOMAIN/s: Cellular retinaldehyde-binding/triple function
Medtr0015s0140	'29.4'	'protein.postranslational modification'	catalytic activity; INVOLVED IN: protein amino acid dephosphorylation; LOCATED IN: mitochondrion
Medtr0137s0080	'29.4'	'protein.postranslational modification'	a RING E3 ligase involved in abscisic acid signaling. KEG is essential for Arabidopsis growth and development. ABA promotes KEG degradation via the ubiquitin dependent 26S proteasome pathway.; KEEP ON GOING (KEG); CONTAINS InterPro DOMAIN/s: Zinc finger
Medtr1g071480	'29.4'	'protein.postranslational modification'	a member of the NIMA-related serine/threonine kinases (Neks) that have been linked to cell-cycle regulation in fungi and mammals. Plant Neks might be involved in plant development processes.; NIMA-related kinase 4 (NEK4); FUNCTIONS IN: protein serine/threonine kinase activity
Medtr1g110210	'29.4'	'protein.postranslational modification'	catalytic activity; INVOLVED IN: biological_process unknown; LOCATED IN: cellular_component unknown; EXPRESSED IN: 22 plant structures; EXPRESSED DURING: 12 growth stages; CONTAINS InterPro DOMAIN/s: Protein phosphatase 2C-related (InterPro:IPR001932)
Medtr1g113960	'29.4'	'protein.postranslational modification'	protein kinase activity; INVOLVED IN: protein amino acid phosphorylation
Medtr1g442790	'29.4'	'protein.postranslational modification'	cGMP-dependent and protein kinase C) kinase family protein; FUNCTIONS IN: protein kinase activity
Medtr2g011170	'29.4'	'protein.postranslational modification'	and pedicels.; receptor kinase 3 (RK3); FUNCTIONS IN: transmembrane receptor protein serine/threonine kinase activity
Medtr2g011210	'29.4'	'protein.postranslational modification'	sugar binding
Medtr2g023890	'29.4'	'protein.postranslational modification'	protein kinase activity
Medtr2g067980	'29.4'	'protein.postranslational modification'	Protein kinase
Medtr2g089290	'29.4'	'protein.postranslational modification'	protein serine/threonine kinase activity
Medtr2g090250	'29.4'	'protein.postranslational modification'	beta chain (InterPro:IPR001220)
Medtr2g092980	'29.4'	'protein.postranslational modification'	protein kinase activity
Medtr3g086540	'29.4'	'protein.postranslational modification'	active site (InterPro:IPR016130)
Medtr3g110180	'29.4'	'protein.postranslational modification'	protein kinase activity
Medtr3g110405	'29.4'	'protein.postranslational modification'	the protein is predominantly nuclear. During mitosis
Medtr3g465590	'29.4'	'protein.postranslational modification'	kinase activity; INVOLVED IN: protein amino acid phosphorylation; LOCATED IN: cellular_component unknown; EXPRESSED IN: 14 plant structures; EXPRESSED DURING: 6 growth stages; CONTAINS InterPro DOMAIN/s: Protein kinase
Medtr4g051648	'29.4'	'protein.postranslational modification'	a member of the NIMA-related serine/threonine kinases (Neks) that have been linked to cell-cycle regulation in fungi and mammals. Plant Neks might be involved in plant development processes.Interacts physically with plant kinesins ARK1 and ARK2. Mutants show defects in root epidermal cell morphology
Medtr4g081650	'29.4'	'protein.postranslational modification'	and pedicels.; receptor kinase 3 (RK3); FUNCTIONS IN: transmembrane receptor protein serine/threonine kinase activity
Medtr4g093040	'29.4'	'protein.postranslational modification'	beta chain (InterPro:IPR001220)
Medtr4g093140	'29.4'	'protein.postranslational modification'	beta chain (InterPro:IPR001220)
Medtr4g113345	'29.4'	'protein.postranslational modification'	catalytic activity; INVOLVED IN: protein amino acid dephosphorylation; LOCATED IN: mitochondrion
Medtr4g114250	'29.4'	'protein.postranslational modification'	Protein kinase
Medtr4g114280	'29.4'	'protein.postranslational modification'	Protein kinase
Medtr4g119830	'29.4'	'protein.postranslational modification'	catalytic activity; EXPRESSED IN: 24 plant structures; EXPRESSED DURING: 15 growth stages; CONTAINS InterPro DOMAIN/s: Protein phosphatase 2C-related (InterPro:IPR001932)
Medtr5g006560	'29.4'	'protein.postranslational modification'	protein kinase activity
Medtr5g022030	'29.4'	'protein.postranslational modification'	calmodulin-dependent protein kinase activity
Medtr5g058090	'29.4'	'protein.postranslational modification'	protein kinase activity
Medtr5g091880	'29.4'	'protein.postranslational modification'	kinase activity; INVOLVED IN: regulation of signal transduction
Medtr7g072605	'29.4'	'protein.postranslational modification'	a plasma membrane H+ ATPase.This phosphorylation appears to regulate the activity of the proton transporter.; SOS3-interacting protein 4 (SIP4); CONTAINS InterPro DOMAIN/s: Protein kinase
Medtr7g078690	'29.4'	'protein.postranslational modification'	kinase activity; INVOLVED IN: in 14 processes; LOCATED IN: nucleus
Medtr7g095410	'29.4'	'protein.postranslational modification'	KIP1-like (InterPro:IPR011684); BEST Arabidopsis thaliana protein match is: Kinase interacting (KIP1-like) family protein (TAIR:AT3G22790.1); Has 30201 Blast hits to 17322 proteins in 780 species: Archae - 12; Bacteria - 1396; Metazoa - 17338; Fungi - 3422; Plants - 5037; Viruses - 0; Other Eukaryotes - 2996 (source: NCBI BLink). & (gnl|cdd|35383 : 120.0) no description available & (gnl|cdd|71206…
Medtr8g013610	'29.4'	'protein.postranslational modification'	recognition of pollen; LOCATED IN: plasma membrane; EXPRESSED IN: 21 plant structures; EXPRESSED DURING: 13 growth stages; CONTAINS InterPro DOMAIN/s: Curculin-like (mannose-binding) lectin (InterPro:IPR001480)
Medtr8g015100	'29.4'	'protein.postranslational modification'	protein kinase activity
Medtr8g028720	'29.4'	'protein.postranslational modification'	kinase activity; INVOLVED IN: in 14 processes; LOCATED IN: nucleus
Medtr8g079790	'29.4'	'protein.postranslational modification'	ATP binding site (InterPro:IPR017441)
Medtr8g432510	'29.4'	'protein.postranslational modification'	a group III Arabidopsis GSK3/shaggy-like kinase. Functions in the brassinosteroid signalling pathway.; shaggy-like protein kinase 32 (SK32); FUNCTIONS IN: kinase activity; INVOLVED IN: response to brassinosteroid stimulus; LOCATED IN: cytosol
Medtr2g040510	'29.4.1'	'protein.postranslational modification.kinase'	suggesting that MEKK1 may be a regulator of MKK2.; MAP kinase kinase 2 (MKK2); FUNCTIONS IN: MAP kinase kinase activity
Medtr3g465470	'29.4.1.51'	'protein.postranslational modification.kinase.receptor like cytoplasmatic kinase I'	kinase activity
Medtr3g462390	'29.4.1.54'	'protein.postranslational modification.kinase.receptor like cytoplasmatic kinase IV'	protein kinase activity
Medtr3g047890	'29.4.1.55'	'protein.postranslational modification.kinase.receptor like cytoplasmatic kinase V'	protein kinase activity
Medtr3g116590	'29.4.1.55'	'protein.postranslational modification.kinase.receptor like cytoplasmatic kinase V'	protein kinase activity
Medtr4g123880	'29.4.1.55'	'protein.postranslational modification.kinase.receptor like cytoplasmatic kinase V'	protein kinase activity
Medtr4g073140	'29.4.1.56'	'protein.postranslational modification.kinase.receptor like cytoplasmatic kinase VI'	protein kinase activity
Medtr4g127840	'29.4.1.56'	'protein.postranslational modification.kinase.receptor like cytoplasmatic kinase VI'	protein kinase activity
Medtr2g024330	'29.4.1.57'	'protein.postranslational modification.kinase.receptor like cytoplasmatic kinase VII'	kinase activity
Medtr4g118855	'29.4.1.57'	'protein.postranslational modification.kinase.receptor like cytoplasmatic kinase VII'	protein kinase activity
Medtr4g126970	'29.4.1.57'	'protein.postranslational modification.kinase.receptor like cytoplasmatic kinase VII'	protein kinase activity
Medtr5g035030	'29.4.1.57'	'protein.postranslational modification.kinase.receptor like cytoplasmatic kinase VII'	protein kinase activity
Medtr5g079840	'29.4.1.57'	'protein.postranslational modification.kinase.receptor like cytoplasmatic kinase VII'	protein kinase activity
Medtr5g099130	'29.4.1.57'	'protein.postranslational modification.kinase.receptor like cytoplasmatic kinase VII'	protein kinase activity
Medtr4g123870	'29.4.1.58'	'protein.postranslational modification.kinase.receptor like cytoplasmatic kinase VIII'	protein kinase activity
Medtr7g084250	'29.4.1.59'	'protein.postranslational modification.kinase.receptor like cytoplasmatic kinase IX'	protein kinase activity
Medtr4g014900	'29.4.1.61'	'protein.postranslational modification.kinase.receptor like cytoplasmatic kinase X'	protein kinase activity
Medtr1g029810	'29.5'	'protein.degradation'	embryo
Medtr2g073050	'29.5'	'protein.degradation'	plant (InterPro:IPR004314); BEST Arabidopsis thaliana protein match is: Protein of Unknown Function (DUF239) (TAIR:AT1G23340.2); Has 35333 Blast hits to 34131 proteins in 2444 species: Archae - 798; Bacteria - 22429; Metazoa - 974; Fungi - 991; Plants - 531; Viruses - 0; Other Eukaryotes - 9610 (source: NCBI BLink). & (reliability: 200.0) & (original description: no original description)'
Medtr2g093840	'29.5'	'protein.degradation'	plant (InterPro:IPR004314); BEST Arabidopsis thaliana protein match is: Protein of Unknown Function (DUF239) (TAIR:AT1G23340.2); Has 789 Blast hits to 744 proteins in 31 species: Archae - 0; Bacteria - 15; Metazoa - 0; Fungi - 10; Plants - 764; Viruses - 0; Other Eukaryotes - 0 (source: NCBI BLink). & (gnl|cdd|66735 : 222.0) no description available & (ipr004314 : 150.97737) Domain of unknown fun…
Medtr4g105400	'29.5'	'protein.degradation'	plant (InterPro:IPR004314); BEST Arabidopsis thaliana protein match is: Protein of Unknown Function (DUF239) (TAIR:AT1G23340.2); Has 1807 Blast hits to 1807 proteins in 277 species: Archae - 0; Bacteria - 0; Metazoa - 736; Fungi - 347; Plants - 385; Viruses - 0; Other Eukaryotes - 339 (source: NCBI BLink). & (gnl|cdd|66735 : 256.0) no description available & (ipr004314 : 171.86098) Domain of unkn…
Medtr7g102750	'29.5'	'protein.degradation'	Peptidase aspartic
Medtr7g105850	'29.5'	'protein.degradation'	membrane
Medtr8g080470	'29.5'	'protein.degradation'	T
Medtr1g006990	'29.5.1'	'protein.degradation.subtilases'	serine-type endopeptidase activity; INVOLVED IN: proteolysis
Medtr1g102350	'29.5.1'	'protein.degradation.subtilases'	serine-type endopeptidase activity; INVOLVED IN: proteolysis
Medtr2g042130	'29.5.1'	'protein.degradation.subtilases'	serine-type endopeptidase activity; INVOLVED IN: proteolysis
Medtr2g046740	'29.5.1'	'protein.degradation.subtilases'	serine-type endopeptidase activity; INVOLVED IN: proteolysis
Medtr3g082200	'29.5.1'	'protein.degradation.subtilases'	response to auxin stimulus
Medtr3g102810	'29.5.1'	'protein.degradation.subtilases'	seed coat development
Medtr4g073540	'29.5.1'	'protein.degradation.subtilases'	proteolysis; LOCATED IN: middle lamella-containing extracellular matrix
Medtr4g127480	'29.5.1'	'protein.degradation.subtilases'	negative regulation of catalytic activity; LOCATED IN: middle lamella-containing extracellular matrix; EXPRESSED IN: 22 plant structures; EXPRESSED DURING: 13 growth stages; CONTAINS InterPro DOMAIN/s: Protease-associated PA (InterPro:IPR003137)
Medtr5g011310	'29.5.1'	'protein.degradation.subtilases'	Proteinase inhibitor
Medtr5g011370	'29.5.1'	'protein.degradation.subtilases'	Proteinase inhibitor
Medtr7g075890	'29.5.1'	'protein.degradation.subtilases'	serine-type endopeptidase activity; INVOLVED IN: proteolysis
Medtr7g075900	'29.5.1'	'protein.degradation.subtilases'	a subtilisin-like serine protease. Cleaves the phytosulfokine AtPSK4
Medtr7g081750	'29.5.1'	'protein.degradation.subtilases'	serine-type endopeptidase activity; INVOLVED IN: proteolysis
Medtr8g022870	'29.5.1'	'protein.degradation.subtilases'	serine-type endopeptidase activity; INVOLVED IN: proteolysis
Medtr8g024380	'29.5.1'	'protein.degradation.subtilases'	serine-type endopeptidase activity; INVOLVED IN: proteolysis
Medtr8g033150	'29.5.1'	'protein.degradation.subtilases'	serine-type endopeptidase activity; INVOLVED IN: proteolysis
Medtr8g079900	'29.5.1'	'protein.degradation.subtilases'	serine-type endopeptidase activity; INVOLVED IN: proteolysis
Medtr8g083220	'29.5.1'	'protein.degradation.subtilases'	serine-type endopeptidase activity; INVOLVED IN: proteolysis
Medtr6g061930	'29.5.11'	'protein.degradation.ubiquitin'	Ubiquitin conserved site (InterPro:IPR019954)
Medtr7g117395	'29.5.11'	'protein.degradation.ubiquitin'	Phosphatidylinositol 3-/4-kinase
Medtr3g099777	'29.5.11.4.1'	'protein.degradation.ubiquitin.E3.HECT'	N-terminal (InterPro:IPR000449)
Medtr4g094705	'29.5.11.4.1'	'protein.degradation.ubiquitin.E3.HECT'	N-terminal (InterPro:IPR000449)
Medtr1g022350	'29.5.11.4.2'	'protein.degradation.ubiquitin.E3.RING'	binding; INVOLVED IN: protein ubiquitination; LOCATED IN: ubiquitin ligase complex; EXPRESSED IN: 22 plant structures; EXPRESSED DURING: 13 growth stages; CONTAINS InterPro DOMAIN/s: U box domain (InterPro:IPR003613)
Medtr1g043410	'29.5.11.4.2'	'protein.degradation.ubiquitin.E3.RING'	root; CONTAINS InterPro DOMAIN/s: Zinc finger
Medtr2g025080	'29.5.11.4.2'	'protein.degradation.ubiquitin.E3.RING'	RING-type (InterPro:IPR001841)
Medtr4g064560	'29.5.11.4.2'	'protein.degradation.ubiquitin.E3.RING'	RING-type (InterPro:IPR001841)
Medtr4g093830	'29.5.11.4.2'	'protein.degradation.ubiquitin.E3.RING'	root
Medtr4g107440	'29.5.11.4.2'	'protein.degradation.ubiquitin.E3.RING'	root; CONTAINS InterPro DOMAIN/s: Zinc finger
Medtr4g117250	'29.5.11.4.2'	'protein.degradation.ubiquitin.E3.RING'	RING-type (InterPro:IPR001841); BEST Arabidopsis thaliana protein match is: RING/U-box superfamily protein (TAIR:AT3G06140.1); Has 1807 Blast hits to 1807 proteins in 277 species: Archae - 0; Bacteria - 0; Metazoa - 736; Fungi - 347; Plants - 385; Viruses - 0; Other Eukaryotes - 339 (source: NCBI BLink). & (reliability: 548.0) & (original description: no original description)'
Medtr4g120270	'29.5.11.4.2'	'protein.degradation.ubiquitin.E3.RING'	defense response; EXPRESSED IN: 22 plant structures; EXPRESSED DURING: 13 growth stages; CONTAINS InterPro DOMAIN/s: Zinc finger
Medtr5g026260	'29.5.11.4.2'	'protein.degradation.ubiquitin.E3.RING'	RING-type (InterPro:IPR001841)
Medtr5g064890	'29.5.11.4.2'	'protein.degradation.ubiquitin.E3.RING'	root
Medtr5g081560	'29.5.11.4.2'	'protein.degradation.ubiquitin.E3.RING'	C3HC4 RING-type (InterPro:IPR018957)
Medtr5g430750	'29.5.11.4.2'	'protein.degradation.ubiquitin.E3.RING'	zinc ion binding; EXPRESSED IN: 13 plant structures; EXPRESSED DURING: 6 growth stages; CONTAINS InterPro DOMAIN/s: Zinc finger
Medtr6g008170	'29.5.11.4.2'	'protein.degradation.ubiquitin.E3.RING'	binding; INVOLVED IN: protein ubiquitination; LOCATED IN: ubiquitin ligase complex
Medtr7g053260	'29.5.11.4.2'	'protein.degradation.ubiquitin.E3.RING'	Armadillo-type fold (InterPro:IPR016024); BEST Arabidopsis thaliana protein match is: ARM repeat superfamily protein (TAIR:AT5G18320.1); Has 35333 Blast hits to 34131 proteins in 2444 species: Archae - 798; Bacteria - 22429; Metazoa - 974; Fungi - 991; Plants - 531; Viruses - 0; Other Eukaryotes - 9610 (source: NCBI BLink). & (q64ha9|spl11_orysa : 224.0) Spotted leaf protein 11 (Spotted leaf11) (…
Medtr8g067490	'29.5.11.4.2'	'protein.degradation.ubiquitin.E3.RING'	zinc ion binding; EXPRESSED IN: 13 plant structures; EXPRESSED DURING: 6 growth stages; CONTAINS InterPro DOMAIN/s: Zinc finger
Medtr8g089670	'29.5.11.4.2'	'protein.degradation.ubiquitin.E3.RING'	RING-type (InterPro:IPR001841)
Medtr8g465910	'29.5.11.4.2'	'protein.degradation.ubiquitin.E3.RING'	RING-type
Medtr8g467220	'29.5.11.4.2'	'protein.degradation.ubiquitin.E3.RING'	Zinc finger
Medtr1g022370	'29.5.11.4.3.2'	'protein.degradation.ubiquitin.E3.SCF.FBOX'	sequence-specific DNA binding transcription factor activity; INVOLVED IN: regulation of transcription; LOCATED IN: cellular_component unknown; EXPRESSED IN: 24 plant structures; EXPRESSED DURING: 15 growth stages; CONTAINS InterPro DOMAIN/s: F-box domain
Medtr1g041245	'29.5.11.4.3.2'	'protein.degradation.ubiquitin.E3.SCF.FBOX'	F-box domain
Medtr1g070515	'29.5.11.4.3.2'	'protein.degradation.ubiquitin.E3.SCF.FBOX'	seed development
Medtr1g079180	'29.5.11.4.3.2'	'protein.degradation.ubiquitin.E3.SCF.FBOX'	cyclin-like (InterPro:IPR001810)
Medtr2g091145	'29.5.11.4.3.2'	'protein.degradation.ubiquitin.E3.SCF.FBOX'	cyclin-like (InterPro:IPR001810)
Medtr4g052460	'29.5.11.4.3.2'	'protein.degradation.ubiquitin.E3.SCF.FBOX'	cyclin-like (InterPro:IPR001810)
Medtr7g070440	'29.5.11.4.3.2'	'protein.degradation.ubiquitin.E3.SCF.FBOX'	cyclin-like (InterPro:IPR001810)
Medtr7g089640	'29.5.11.4.3.2'	'protein.degradation.ubiquitin.E3.SCF.FBOX'	cyclin-like (InterPro:IPR001810)
Medtr4g104140	'29.5.11.4.5.2'	'protein.degradation.ubiquitin.E3.BTB/POZ Cullin3.BTB/POZ'	stresses
Medtr1g107550	'29.5.3'	'protein.degradation.cysteine protease'	cysteine-type endopeptidase activity; INVOLVED IN: response to salt stress; LOCATED IN: vacuole; EXPRESSED IN: 24 plant structures; EXPRESSED DURING: 15 growth stages; CONTAINS InterPro DOMAIN/s: Peptidase C1A
Medtr2g015840	'29.5.3'	'protein.degradation.cysteine protease'	cysteine-type peptidase activity; INVOLVED IN: proteolysis; LOCATED IN: endomembrane system; CONTAINS InterPro DOMAIN/s: Proteinase inhibitor I29
Medtr2g015850	'29.5.3'	'protein.degradation.cysteine protease'	cysteine-type endopeptidase activity; INVOLVED IN: proteolysis; LOCATED IN: endomembrane system; CONTAINS InterPro DOMAIN/s: Peptidase C1A
Medtr3g116080	'29.5.3'	'protein.degradation.cysteine protease'	cysteine-type endopeptidase activity; INVOLVED IN: proteolysis
Medtr4g094918	'29.5.3'	'protein.degradation.cysteine protease'	cysteine-type endopeptidase activity; INVOLVED IN: response to salt stress; LOCATED IN: vacuole; EXPRESSED IN: 24 plant structures; EXPRESSED DURING: 15 growth stages; CONTAINS InterPro DOMAIN/s: Peptidase C1A
Medtr4g104370	'29.5.3'	'protein.degradation.cysteine protease'	cysteine-type peptidase activity; INVOLVED IN: proteolysis; LOCATED IN: endomembrane system; EXPRESSED IN: 8 plant structures; EXPRESSED DURING: 4 anthesis
Medtr1g039270	'29.5.4'	'protein.degradation.aspartate protease'	Peptidase aspartic
Medtr1g111350	'29.5.4'	'protein.degradation.aspartate protease'	Peptidase aspartic
Medtr2g022430	'29.5.4'	'protein.degradation.aspartate protease'	plasma membrane
Medtr2g022460	'29.5.4'	'protein.degradation.aspartate protease'	plasma membrane
Medtr2g022480	'29.5.4'	'protein.degradation.aspartate protease'	plasma membrane
Medtr3g087780	'29.5.4'	'protein.degradation.aspartate protease'	anchored to membrane; EXPRESSED IN: cultured cell; CONTAINS InterPro DOMAIN/s: Peptidase aspartic (InterPro:IPR021109)
Medtr4g123563	'29.5.4'	'protein.degradation.aspartate protease'	response to salt stress; LOCATED IN: vacuole; EXPRESSED IN: 25 plant structures; EXPRESSED DURING: 16 growth stages; CONTAINS InterPro DOMAIN/s: Saposin-like (InterPro:IPR011001)
Medtr5g012490	'29.5.4'	'protein.degradation.aspartate protease'	Peptidase aspartic
Medtr5g022880	'29.5.4'	'protein.degradation.aspartate protease'	Peptidase aspartic
Medtr6g084710	'29.5.4'	'protein.degradation.aspartate protease'	Peptidase aspartic
Medtr2g012850	'29.5.5'	'protein.degradation.serine protease'	C globular stage
Medtr2g095750	'29.5.5'	'protein.degradation.serine protease'	serine carboxypeptidase (InterPro:IPR001563)
Medtr3g045770	'29.5.5'	'protein.degradation.serine protease'	serine carboxypeptidase (InterPro:IPR001563); BEST Arabidopsis thaliana protein match is: serine carboxypeptidase-like 1 (TAIR:AT5G36180.1); Has 4062 Blast hits to 3951 proteins in 474 species: Archae - 0; Bacteria - 539; Metazoa - 654; Fungi - 845; Plants - 1580; Viruses - 0; Other Eukaryotes - 444 (source: NCBI BLink). & (gnl|cdd|36496 : 384.0) no description available & (gnl|cdd|84781 : 365.0)…
Medtr3g111150	'29.5.5'	'protein.degradation.serine protease'	cysteine-type endopeptidase inhibitor activity; INVOLVED IN: biological_process unknown; LOCATED IN: apoplast; EXPRESSED IN: 25 plant structures; EXPRESSED DURING: 13 growth stages; CONTAINS InterPro DOMAIN/s: Protease inhibitor I4
Medtr4g057595	'29.5.5'	'protein.degradation.serine protease'	serine carboxypeptidase (InterPro:IPR001563)
Medtr7g080180	'29.5.5'	'protein.degradation.serine protease'	serine carboxypeptidase (InterPro:IPR001563)
Medtr5g075340	'29.5.7'	'protein.degradation.metalloprotease'	ATP-dependent peptidase activity
Medtr8g062770	'29.5.7'	'protein.degradation.metalloprotease'	metalloendopeptidase activity
Medtr1g022245	'29.5.9'	'protein.degradation.AAA type'	ATPase activity
Medtr1g022250	'29.5.9'	'protein.degradation.AAA type'	ATPase activity
Medtr2g061820	'29.5.9'	'protein.degradation.AAA type'	ATPase activity
Medtr2g076970	'29.5.9'	'protein.degradation.AAA type'	ATPase activity
Medtr2g076990	'29.5.9'	'protein.degradation.AAA type'	ATPase activity
Medtr5g020990	'29.5.9'	'protein.degradation.AAA type'	ATPase activity
Medtr6g009720	'29.5.9'	'protein.degradation.AAA type'	ATPase activity
Medtr6g033740	'29.5.9'	'protein.degradation.AAA type'	nucleotide binding
Medtr1g024840	'29.6'	'protein.folding'	heat shock protein binding; INVOLVED IN: protein folding; LOCATED IN: chloroplast thylakoid membrane
Medtr1g090140	'29.6'	'protein.folding'	mitochondrial precursor (HSP60-2) - Cucurbita maxima (Pumpkin) (Winter squash) & (at3g23990 : 906.0) mitochondrial chaperonin HSP. assist in rapid assembly of the oligomeric protein structures in the mitochondria.; heat shock protein 60 (HSP60); FUNCTIONS IN: copper ion binding
Medtr2g006960	'29.7.4'	'protein.glycosylation.UDP-glucose glycoprotein glucosyltransferase'	and EFR accumulation and signalling.; EMS-mutagenized bri1 suppressor 1 (EBS1); CONTAINS InterPro DOMAIN/s: Glycosyl transferase
Medtr1g115475	'29.7.5'	'protein.glycosylation.alpha-1	'medtr1g115475.1'
Medtr6g004880	'3.1.2.1'	'minor CHO metabolism.raffinose family.raffinose synthases.known'	hydrolyzing O-glycosyl compounds
Medtr4g080160	'3.2.3'	'minor CHO metabolism.trehalose.potential TPS/TPP'	neither activity has been detected in enzymatic assays nor has the protein been able to complement yeast TPS or TPP mutants.; trehalose-phosphatase/synthase 7 (TPS7); FUNCTIONS IN: transferase activity
Medtr8g063790	'3.2.3'	'minor CHO metabolism.trehalose.potential TPS/TPP'	transferring glycosyl groups
Medtr8g105740	'3.2.3'	'minor CHO metabolism.trehalose.potential TPS/TPP'	subfamily IIB (InterPro:IPR006379)
Medtr8g099985	'3.2.4'	'minor CHO metabolism.trehalose.trehalase'	member of Glycoside Hydrolase Family 37.; trehalase 1 (TRE1); CONTAINS InterPro DOMAIN/s: Glycoside hydrolase
Medtr8g091320	'3.4.3'	'minor CHO metabolism.myo-inositol.InsP Synthases'	root and silique. Immunolocaliazation experiments with an antibody recognizing MIPS1
Medtr1g061560	'3.5'	'minor CHO metabolism.others'	transferring glycosyl groups; INVOLVED IN: biosynthetic process
Medtr4g092780	'3.5'	'minor CHO metabolism.others'	isomerase activity
Medtr5g020640	'3.5'	'minor CHO metabolism.others'	isomerase activity
Medtr3g047390	'3.6'	'minor CHO metabolism.callose'	transferring glycosyl groups
Medtr7g005950	'3.6'	'minor CHO metabolism.callose'	transferring glycosyl groups
Medtr1g101120	'30.1'	'signalling.in sugar and nutrient physiology'	T
Medtr3g074830	'30.1'	'signalling.in sugar and nutrient physiology'	plant-type cell wall; EXPRESSED IN: 21 plant structures; EXPRESSED DURING: 13 growth stages; CONTAINS InterPro DOMAIN/s: Phosphate-induced protein 1 (InterPro:IPR006766); BEST Arabidopsis thaliana protein match is: Phosphate-responsive 1 family protein (TAIR:AT1G35140.1); Has 398 Blast hits to 398 proteins in 24 species: Archae - 0; Bacteria - 2; Metazoa - 0; Fungi - 0; Plants - 396; Viruses - 0;…
Medtr4g018880	'30.1'	'signalling.in sugar and nutrient physiology'	T
Medtr4g087925	'30.1'	'signalling.in sugar and nutrient physiology'	response to light stimulus; LOCATED IN: vacuole; EXPRESSED IN: stem
Medtr4g094240	'30.1'	'signalling.in sugar and nutrient physiology'	plant-type cell wall; EXPRESSED IN: 23 plant structures; EXPRESSED DURING: 13 growth stages; CONTAINS InterPro DOMAIN/s: Phosphate-induced protein 1 (InterPro:IPR006766); BEST Arabidopsis thaliana protein match is: EXORDIUM like 4 (TAIR:AT5G09440.1); Has 1807 Blast hits to 1807 proteins in 277 species: Archae - 0; Bacteria - 0; Metazoa - 736; Fungi - 347; Plants - 385; Viruses - 0; Other Eukaryot…
Medtr5g059900	'30.1'	'signalling.in sugar and nutrient physiology'	response to light stimulus; LOCATED IN: vacuole; EXPRESSED IN: stem
Medtr5g064340	'30.1'	'signalling.in sugar and nutrient physiology'	plant-type cell wall; EXPRESSED IN: 21 plant structures; EXPRESSED DURING: 13 growth stages; CONTAINS InterPro DOMAIN/s: Phosphate-induced protein 1 (InterPro:IPR006766); BEST Arabidopsis thaliana protein match is: Phosphate-responsive 1 family protein (TAIR:AT1G35140.1); Has 398 Blast hits to 398 proteins in 24 species: Archae - 0; Bacteria - 2; Metazoa - 0; Fungi - 0; Plants - 396; Viruses - 0;…
Medtr5g064345	'30.1'	'signalling.in sugar and nutrient physiology'	plant-type cell wall; EXPRESSED IN: 21 plant structures; EXPRESSED DURING: 13 growth stages; CONTAINS InterPro DOMAIN/s: Phosphate-induced protein 1 (InterPro:IPR006766); BEST Arabidopsis thaliana protein match is: Phosphate-responsive 1 family protein (TAIR:AT1G35140.1); Has 398 Blast hits to 398 proteins in 24 species: Archae - 0; Bacteria - 2; Metazoa - 0; Fungi - 0; Plants - 396; Viruses - 0;…
Medtr5g064360	'30.1'	'signalling.in sugar and nutrient physiology'	plant-type cell wall; EXPRESSED IN: 21 plant structures; EXPRESSED DURING: 13 growth stages; CONTAINS InterPro DOMAIN/s: Phosphate-induced protein 1 (InterPro:IPR006766); BEST Arabidopsis thaliana protein match is: Phosphate-responsive 1 family protein (TAIR:AT1G35140.1); Has 398 Blast hits to 398 proteins in 24 species: Archae - 0; Bacteria - 2; Metazoa - 0; Fungi - 0; Plants - 396; Viruses - 0;…
Medtr5g464340	'30.1'	'signalling.in sugar and nutrient physiology'	plant-type cell wall; EXPRESSED IN: 21 plant structures; EXPRESSED DURING: 13 growth stages; CONTAINS InterPro DOMAIN/s: Phosphate-induced protein 1 (InterPro:IPR006766); BEST Arabidopsis thaliana protein match is: Phosphate-responsive 1 family protein (TAIR:AT1G35140.1); Has 398 Blast hits to 398 proteins in 24 species: Archae - 0; Bacteria - 2; Metazoa - 0; Fungi - 0; Plants - 396; Viruses - 0;…
Medtr1g014070	'30.11'	'signalling.light'	NPY2/AT2G14820
Medtr1g035720	'30.11'	'signalling.light'	BTB/POZ (InterPro:IPR013069)
Medtr1g082690	'30.11'	'signalling.light'	BTB/POZ fold (InterPro:IPR011333)
Medtr2g027410	'30.11'	'signalling.light'	BTB/POZ (InterPro:IPR013069)
Medtr4g068970	'30.11'	'signalling.light'	catalytic activity; INVOLVED IN: metabolic process; LOCATED IN: chloroplast thylakoid membrane
Medtr8g015340	'30.11'	'signalling.light'	protein kinase activity
Medtr8g069330	'30.11'	'signalling.light'	BTB/POZ fold (InterPro:IPR011333); BEST Arabidopsis thaliana protein match is: Phototropic-responsive NPH3 family protein (TAIR:AT3G26490.1). & (q5ks50|nph3_orysa : 301.0) Coleoptile phototropism protein 1 (Non-phototropic hypocotyl 3-like protein) (NPH3-like protein) - Oryza sativa (Rice) & (gnl|cdd|66659 : 221.0) no description available & (ipr004249 : 186.03938) NPH3 & (reliability: 1625.5688)…
Medtr8g078900	'30.11'	'signalling.light'	BTB/POZ fold (InterPro:IPR011333)
Medtr1g041465	'30.11.1'	'signalling.light.COP9 signalosome'	T
Medtr8g072950	'30.2'	'signalling.receptor kinases'	a member of the Plant Intracellular Ras-group-related LRRs (Leucine rich repeat proteins). PIRLs are a distinct
Medtr8g015040	'30.2.1'	'signalling.receptor kinases.leucine rich repeat I'	protein kinase activity
Medtr4g092550	'30.2.10'	'signalling.receptor kinases.leucine rich repeat X'	one of which is the SOBIR1(AT2G31880)-dependent pathway.; BAK1-interacting receptor-like kinase 1 (BIR1); FUNCTIONS IN: protein kinase activity; INVOLVED IN: negative regulation of defense response; LOCATED IN: plasma membrane; EXPRESSED IN: 23 plant structures; EXPRESSED DURING: 13 growth stages; CONTAINS InterPro DOMAIN/s: Protein kinase
Medtr8g010180	'30.2.10'	'signalling.receptor kinases.leucine rich repeat X'	one of which is the SOBIR1(AT2G31880)-dependent pathway.; BAK1-interacting receptor-like kinase 1 (BIR1); FUNCTIONS IN: protein kinase activity; INVOLVED IN: negative regulation of defense response; LOCATED IN: plasma membrane; EXPRESSED IN: 23 plant structures; EXPRESSED DURING: 13 growth stages; CONTAINS InterPro DOMAIN/s: Protein kinase
Medtr1g069470	'30.2.11'	'signalling.receptor kinases.leucine rich repeat XI'	protein kinase activity
Medtr2g005810	'30.2.11'	'signalling.receptor kinases.leucine rich repeat XI'	with more than 85% a.a. identity. It has a broad expression pattern and is involved in vascular strand development in the leaf
Medtr2g016530	'30.2.11'	'signalling.receptor kinases.leucine rich repeat XI'	a putative leucine-rich repeat transmembrane-type receptor kinase. GSO1 and a homolog GSO2 (At5g44700) are required for the formation of a normal epidermal surface during embryogenesis.; GASSHO1 (GSO1); FUNCTIONS IN: protein serine/threonine kinase activity
Medtr2g090710	'30.2.11'	'signalling.receptor kinases.leucine rich repeat XI'	kinase activity
Medtr2g098250	'30.2.11'	'signalling.receptor kinases.leucine rich repeat XI'	defense response; LOCATED IN: apoplast
Medtr2g105680	'30.2.11'	'signalling.receptor kinases.leucine rich repeat XI'	protein serine/threonine kinase activity
Medtr3g060880	'30.2.11'	'signalling.receptor kinases.leucine rich repeat XI'	ATP binding site (InterPro:IPR017441)
Medtr3g090480	'30.2.11'	'signalling.receptor kinases.leucine rich repeat XI'	protein kinase activity
Medtr3g110450	'30.2.11'	'signalling.receptor kinases.leucine rich repeat XI'	membrane; EXPRESSED IN: 23 plant structures; EXPRESSED DURING: 14 growth stages; CONTAINS InterPro DOMAIN/s: Protein kinase
Medtr6g088785	'30.2.11'	'signalling.receptor kinases.leucine rich repeat XI'	membrane; EXPRESSED IN: 23 plant structures; EXPRESSED DURING: 14 growth stages; CONTAINS InterPro DOMAIN/s: Protein kinase
Medtr6g088790	'30.2.11'	'signalling.receptor kinases.leucine rich repeat XI'	membrane; EXPRESSED IN: 23 plant structures; EXPRESSED DURING: 14 growth stages; CONTAINS InterPro DOMAIN/s: Protein kinase
Medtr1g088930	'30.2.12'	'signalling.receptor kinases.leucine rich repeat XII'	transmembrane receptor protein kinase activity
Medtr1g088935	'30.2.12'	'signalling.receptor kinases.leucine rich repeat XII'	kinase activity
Medtr1g088940	'30.2.12'	'signalling.receptor kinases.leucine rich repeat XII'	kinase activity
Medtr2g016580	'30.2.12'	'signalling.receptor kinases.leucine rich repeat XII'	kinase activity
Medtr3g449540	'30.2.12'	'signalling.receptor kinases.leucine rich repeat XII'	kinase activity
Medtr5g024450	'30.2.12'	'signalling.receptor kinases.leucine rich repeat XII'	kinase activity
Medtr5g025900	'30.2.12'	'signalling.receptor kinases.leucine rich repeat XII'	kinase activity
Medtr5g026150	'30.2.12'	'signalling.receptor kinases.leucine rich repeat XII'	kinase activity
Medtr5g082460	'30.2.12'	'signalling.receptor kinases.leucine rich repeat XII'	kinase activity
Medtr6g036780	'30.2.12'	'signalling.receptor kinases.leucine rich repeat XII'	kinase activity
Medtr7g007560	'30.2.12'	'signalling.receptor kinases.leucine rich repeat XII'	membrane; EXPRESSED IN: 23 plant structures; EXPRESSED DURING: 13 growth stages; CONTAINS InterPro DOMAIN/s: Protein kinase
Medtr7g007620	'30.2.12'	'signalling.receptor kinases.leucine rich repeat XII'	membrane; EXPRESSED IN: 23 plant structures; EXPRESSED DURING: 13 growth stages; CONTAINS InterPro DOMAIN/s: Protein kinase
Medtr8g047230	'30.2.12'	'signalling.receptor kinases.leucine rich repeat XII'	membrane; EXPRESSED IN: 23 plant structures; EXPRESSED DURING: 13 growth stages; CONTAINS InterPro DOMAIN/s: Protein kinase
Medtr8g469720	'30.2.12'	'signalling.receptor kinases.leucine rich repeat XII'	transmembrane receptor protein kinase activity
Medtr8g469850	'30.2.12'	'signalling.receptor kinases.leucine rich repeat XII'	transmembrane receptor protein kinase activity
Medtr8g470370	'30.2.12'	'signalling.receptor kinases.leucine rich repeat XII'	kinase activity
Medtr8g470840	'30.2.12'	'signalling.receptor kinases.leucine rich repeat XII'	transmembrane receptor protein kinase activity
Medtr8g470970	'30.2.12'	'signalling.receptor kinases.leucine rich repeat XII'	transmembrane receptor protein kinase activity
Medtr1g015530	'30.2.13'	'signalling.receptor kinases.leucine rich repeat XIII'	a transmembrane region
Medtr1g022265	'30.2.14'	'signalling.receptor kinases.leucine rich repeat XIV'	protein kinase activity
Medtr1g031470	'30.2.15'	'signalling.receptor kinases.thaumatin like'	ATP binding site (InterPro:IPR017441)
Medtr2g080220	'30.2.16'	'signalling.receptor kinases.Catharanthus roseus-like RLK1'	a receptor kinase regulated by Brassinosteroids and required for cell elongation during vegetative growth.; THESEUS1 (THE1); FUNCTIONS IN: protein kinase activity
Medtr4g052290	'30.2.16'	'signalling.receptor kinases.Catharanthus roseus-like RLK1'	plasma-membrane localized receptor-like kinase that accumulates asymetrically in the synergid membrnane at the filiform apparatus and mediates male-female gametophyte interactions during pollen tube reception.; FERONIA (FER); FUNCTIONS IN: protein kinase activity
Medtr7g015250	'30.2.16'	'signalling.receptor kinases.Catharanthus roseus-like RLK1'	plasma-membrane localized receptor-like kinase that accumulates asymetrically in the synergid membrnane at the filiform apparatus and mediates male-female gametophyte interactions during pollen tube reception.; FERONIA (FER); FUNCTIONS IN: protein kinase activity
Medtr7g015420	'30.2.16'	'signalling.receptor kinases.Catharanthus roseus-like RLK1'	plasma-membrane localized receptor-like kinase that accumulates asymetrically in the synergid membrnane at the filiform apparatus and mediates male-female gametophyte interactions during pollen tube reception.; FERONIA (FER); FUNCTIONS IN: protein kinase activity
Medtr7g015510	'30.2.16'	'signalling.receptor kinases.Catharanthus roseus-like RLK1'	plasma-membrane localized receptor-like kinase that accumulates asymetrically in the synergid membrnane at the filiform apparatus and mediates male-female gametophyte interactions during pollen tube reception.; FERONIA (FER); FUNCTIONS IN: protein kinase activity
Medtr7g015550	'30.2.16'	'signalling.receptor kinases.Catharanthus roseus-like RLK1'	plasma-membrane localized receptor-like kinase that accumulates asymetrically in the synergid membrnane at the filiform apparatus and mediates male-female gametophyte interactions during pollen tube reception.; FERONIA (FER); FUNCTIONS IN: protein kinase activity
Medtr1g021638	'30.2.17'	'signalling.receptor kinases.DUF 26'	vacuole; EXPRESSED IN: 21 plant structures; EXPRESSED DURING: 13 growth stages; CONTAINS InterPro DOMAIN/s: Protein kinase
Medtr1g073320	'30.2.17'	'signalling.receptor kinases.DUF 26'	plasmodesmata-mediated intercellular transport; LOCATED IN: plasmodesma; EXPRESSED IN: 17 plant structures; EXPRESSED DURING: 12 growth stages; CONTAINS InterPro DOMAIN/s: Protein of unknown function DUF26 (InterPro:IPR002902); BEST Arabidopsis thaliana protein match is: plasmodesmata-located protein 3 (TAIR:AT2G33330.1); Has 1091 Blast hits to 1028 proteins in 65 species: Archae - 0; Bacteria - …
Medtr1g104890	'30.2.17'	'signalling.receptor kinases.DUF 26'	ATP binding site (InterPro:IPR017441)
Medtr1g105650	'30.2.17'	'signalling.receptor kinases.DUF 26'	ATP binding site (InterPro:IPR017441)
Medtr1g105700	'30.2.17'	'signalling.receptor kinases.DUF 26'	root; CONTAINS InterPro DOMAIN/s: Protein kinase
Medtr1g105750	'30.2.17'	'signalling.receptor kinases.DUF 26'	vacuole; EXPRESSED IN: 21 plant structures; EXPRESSED DURING: 13 growth stages; CONTAINS InterPro DOMAIN/s: Protein kinase
Medtr1g105755	'30.2.17'	'signalling.receptor kinases.DUF 26'	vacuole; EXPRESSED IN: 21 plant structures; EXPRESSED DURING: 13 growth stages; CONTAINS InterPro DOMAIN/s: Protein kinase
Medtr1g105800	'30.2.17'	'signalling.receptor kinases.DUF 26'	vacuole; EXPRESSED IN: 21 plant structures; EXPRESSED DURING: 13 growth stages; CONTAINS InterPro DOMAIN/s: Protein kinase
Medtr1g105820	'30.2.17'	'signalling.receptor kinases.DUF 26'	vacuole; EXPRESSED IN: 21 plant structures; EXPRESSED DURING: 13 growth stages; CONTAINS InterPro DOMAIN/s: Protein kinase
Medtr1g105840	'30.2.17'	'signalling.receptor kinases.DUF 26'	vacuole; EXPRESSED IN: 21 plant structures; EXPRESSED DURING: 13 growth stages; CONTAINS InterPro DOMAIN/s: Protein kinase
Medtr3g064090	'30.2.17'	'signalling.receptor kinases.DUF 26'	ATP binding site (InterPro:IPR017441)
Medtr5g065130	'30.2.17'	'signalling.receptor kinases.DUF 26'	protein kinase activity
Medtr5g068260	'30.2.17'	'signalling.receptor kinases.DUF 26'	ATP binding site (InterPro:IPR017441)
Medtr6g057750	'30.2.17'	'signalling.receptor kinases.DUF 26'	ATP binding site (InterPro:IPR017441)
Medtr6g463400	'30.2.17'	'signalling.receptor kinases.DUF 26'	ATP binding site (InterPro:IPR017441)
Medtr6g463700	'30.2.17'	'signalling.receptor kinases.DUF 26'	ATP binding site (InterPro:IPR017441)
Medtr8g028895	'30.2.17'	'signalling.receptor kinases.DUF 26'	ATP binding site (InterPro:IPR017441)
Medtr8g041690	'30.2.17'	'signalling.receptor kinases.DUF 26'	ATP binding site (InterPro:IPR017441)
Medtr8g041890	'30.2.17'	'signalling.receptor kinases.DUF 26'	protein kinase activity
Medtr8g104990	'30.2.17'	'signalling.receptor kinases.DUF 26'	T
Medtr8g016330	'30.2.18'	'signalling.receptor kinases.extensin'	protein kinase activity
Medtr4g093080	'30.2.19'	'signalling.receptor kinases.legume-lectin'	beta chain (InterPro:IPR001220)
Medtr7g062700	'30.2.19'	'signalling.receptor kinases.legume-lectin'	beta chain (InterPro:IPR001220)
Medtr7g062950	'30.2.19'	'signalling.receptor kinases.legume-lectin'	beta chain (InterPro:IPR001220)
Medtr7g062990	'30.2.19'	'signalling.receptor kinases.legume-lectin'	beta chain (InterPro:IPR001220)
Medtr1g097160	'30.2.2'	'signalling.receptor kinases.leucine rich repeat II'	with higher expression in the tapetal cell layer. SERK1 and SERK2 receptor kinases function redundantly as an important control point for sporophytic development controlling male gametophyte production.; somatic embryogenesis receptor-like kinase 2 (SERK2); FUNCTIONS IN: kinase activity; INVOLVED IN: pollen maturation
Medtr5g005170	'30.2.2'	'signalling.receptor kinases.leucine rich repeat II'	type 2 (InterPro:IPR013210)
Medtr1g110120	'30.2.20'	'signalling.receptor kinases.wheat LRK10 like'	ATP binding site (InterPro:IPR017441)
Medtr1g110130	'30.2.20'	'signalling.receptor kinases.wheat LRK10 like'	ATP binding site (InterPro:IPR017441)
Medtr1g110180	'30.2.20'	'signalling.receptor kinases.wheat LRK10 like'	ATP binding site (InterPro:IPR017441)
Medtr5g055310	'30.2.20'	'signalling.receptor kinases.wheat LRK10 like'	ATP binding site (InterPro:IPR017441)
Medtr6g082850	'30.2.20'	'signalling.receptor kinases.wheat LRK10 like'	protein kinase activity
Medtr6g082980	'30.2.20'	'signalling.receptor kinases.wheat LRK10 like'	protein kinase activity
Medtr6g083010	'30.2.20'	'signalling.receptor kinases.wheat LRK10 like'	protein kinase activity
Medtr6g083020	'30.2.20'	'signalling.receptor kinases.wheat LRK10 like'	protein kinase activity
Medtr6g083760	'30.2.20'	'signalling.receptor kinases.wheat LRK10 like'	protein kinase activity
Medtr7g082533	'30.2.20'	'signalling.receptor kinases.wheat LRK10 like'	ATP binding site (InterPro:IPR017441)
Medtr7g082537	'30.2.20'	'signalling.receptor kinases.wheat LRK10 like'	ATP binding site (InterPro:IPR017441)
Medtr3g080170	'30.2.21'	'signalling.receptor kinases.lysine motif'	cell wall macromolecule catabolic process; LOCATED IN: plasma membrane; EXPRESSED IN: 21 plant structures; EXPRESSED DURING: 13 growth stages; CONTAINS InterPro DOMAIN/s: Peptidoglycan-binding lysin domain (InterPro:IPR018392)
Medtr5g019050	'30.2.21'	'signalling.receptor kinases.lysine motif'	cell wall macromolecule catabolic process; LOCATED IN: plasma membrane; EXPRESSED IN: 21 plant structures; EXPRESSED DURING: 13 growth stages; CONTAINS InterPro DOMAIN/s: Peptidoglycan-binding lysin domain (InterPro:IPR018392)
Medtr5g086540	'30.2.21'	'signalling.receptor kinases.lysine motif'	receptor signaling protein activity
Medtr2g100290	'30.2.22'	'signalling.receptor kinases.proline extensin like'	protein kinase activity
Medtr6g088610	'30.2.22'	'signalling.receptor kinases.proline extensin like'	ATP binding; INVOLVED IN: protein amino acid phosphorylation
Medtr8g101670	'30.2.22'	'signalling.receptor kinases.proline extensin like'	protein kinase activity
Medtr2g011180	'30.2.24'	'signalling.receptor kinases.S-locus glycoprotein like'	and pedicels.; receptor kinase 3 (RK3); FUNCTIONS IN: transmembrane receptor protein serine/threonine kinase activity
Medtr3g019390	'30.2.24'	'signalling.receptor kinases.S-locus glycoprotein like'	protein serine/threonine kinase activity
Medtr3g019420	'30.2.24'	'signalling.receptor kinases.S-locus glycoprotein like'	protein serine/threonine kinase activity
Medtr3g020280	'30.2.24'	'signalling.receptor kinases.S-locus glycoprotein like'	protein serine/threonine kinase activity
Medtr4g091670	'30.2.24'	'signalling.receptor kinases.S-locus glycoprotein like'	and pedicels.; receptor kinase 3 (RK3); FUNCTIONS IN: transmembrane receptor protein serine/threonine kinase activity
Medtr6g043790	'30.2.24'	'signalling.receptor kinases.S-locus glycoprotein like'	recognition of pollen; LOCATED IN: plasma membrane; EXPRESSED IN: 23 plant structures; EXPRESSED DURING: 13 growth stages; CONTAINS InterPro DOMAIN/s: Curculin-like (mannose-binding) lectin (InterPro:IPR001480)
Medtr6g471820	'30.2.24'	'signalling.receptor kinases.S-locus glycoprotein like'	protein serine/threonine kinase activity
Medtr1g010240	'30.2.25'	'signalling.receptor kinases.wall associated kinase'	kinase activity; INVOLVED IN: protein amino acid phosphorylation; LOCATED IN: plasma membrane; EXPRESSED IN: 9 plant structures; EXPRESSED DURING: 9 growth stages; CONTAINS InterPro DOMAIN/s: EGF-like calcium-binding (InterPro:IPR001881)
Medtr1g010250	'30.2.25'	'signalling.receptor kinases.wall associated kinase'	kinase activity; INVOLVED IN: protein amino acid phosphorylation; LOCATED IN: plasma membrane; CONTAINS InterPro DOMAIN/s: EGF-like calcium-binding (InterPro:IPR001881)
Medtr1g010260	'30.2.25'	'signalling.receptor kinases.wall associated kinase'	affecting the expression and activity of vacuolar invertase.; wall-associated kinase 2 (WAK2); FUNCTIONS IN: protein serine/threonine kinase activity
Medtr5g018570	'30.2.25'	'signalling.receptor kinases.wall associated kinase'	ATP binding site (InterPro:IPR017441)
Medtr1g009270	'30.2.3'	'signalling.receptor kinases.leucine rich repeat III'	kinase activity
Medtr1g061590	'30.2.3'	'signalling.receptor kinases.leucine rich repeat III'	kinase activity
Medtr2g030380	'30.2.3'	'signalling.receptor kinases.leucine rich repeat III'	protein kinase activity
Medtr3g093710	'30.2.3'	'signalling.receptor kinases.leucine rich repeat III'	kinase activity
Medtr4g014350	'30.2.3'	'signalling.receptor kinases.leucine rich repeat III'	kinase activity
Medtr4g113100	'30.2.3'	'signalling.receptor kinases.leucine rich repeat III'	protein kinase activity
Medtr5g055470	'30.2.3'	'signalling.receptor kinases.leucine rich repeat III'	kinase activity
Medtr6g470960	'30.2.3'	'signalling.receptor kinases.leucine rich repeat III'	kinase activity
Medtr8g107470	'30.2.3'	'signalling.receptor kinases.leucine rich repeat III'	kinase activity
Medtr4g046113	'30.2.5'	'signalling.receptor kinases.leucine rich repeat V'	kinase activity
Medtr3g088930	'30.2.6'	'signalling.receptor kinases.leucine rich repeat VI'	protein kinase activity
Medtr5g010440	'30.2.6'	'signalling.receptor kinases.leucine rich repeat VI'	protein kinase activity
Medtr6g023390	'30.2.6'	'signalling.receptor kinases.leucine rich repeat VI'	protein kinase activity
Medtr8g044230	'30.2.6'	'signalling.receptor kinases.leucine rich repeat VI'	protein kinase activity
Medtr8g098510	'30.2.6'	'signalling.receptor kinases.leucine rich repeat VI'	protein kinase activity
Medtr3g093930	'30.2.7'	'signalling.receptor kinases.leucine rich repeat VII'	kinase activity
Medtr4g028090	'30.2.7'	'signalling.receptor kinases.leucine rich repeat VII'	kinase activity
Medtr7g074010	'30.2.8.1'	'signalling.receptor kinases.leucine rich repeat VIII.VIII-1'	kinase activity
Medtr8g070890	'30.2.8.1'	'signalling.receptor kinases.leucine rich repeat VIII.VIII-1'	kinase activity
Medtr8g070910	'30.2.8.1'	'signalling.receptor kinases.leucine rich repeat VIII.VIII-1'	kinase activity
Medtr2g074980	'30.2.8.2'	'signalling.receptor kinases.leucine rich repeat VIII.VIII-2'	protein kinase activity
Medtr2g075140	'30.2.8.2'	'signalling.receptor kinases.leucine rich repeat VIII.VIII-2'	protein kinase activity
Medtr5g091950	'30.2.8.2'	'signalling.receptor kinases.leucine rich repeat VIII.VIII-2'	kinase activity
Medtr1g104850	'30.2.99'	'signalling.receptor kinases.misc'	type 2 (InterPro:IPR013210)
Medtr3g065370	'30.2.99'	'signalling.receptor kinases.misc'	T
Medtr4g085480	'30.2.99'	'signalling.receptor kinases.misc'	T
Medtr7g071790	'30.2.99'	'signalling.receptor kinases.misc'	Wun1 (InterPro:IPR009798); BEST Arabidopsis thaliana protein match is: senescence associated gene 20 (TAIR:AT3G10985.1); Has 1807 Blast hits to 1807 proteins in 277 species: Archae - 0; Bacteria - 0; Metazoa - 736; Fungi - 347; Plants - 385; Viruses - 0; Other Eukaryotes - 339 (source: NCBI BLink). & (gnl|cdd|70566 : 108.0) no description available & (reliability: 310.0) & (original description: …
Medtr1g007920	'30.3'	'signalling.calcium'	T
Medtr1g041285	'30.3'	'signalling.calcium'	calcium-binding site (InterPro:IPR018247)
Medtr1g041430	'30.3'	'signalling.calcium'	T
Medtr1g051810	'30.3'	'signalling.calcium'	T
Medtr1g052530	'30.3'	'signalling.calcium'	calcium-dependent protein kinase C activity
Medtr1g052885	'30.3'	'signalling.calcium'	likely acts upstream of PID to regulate the activity of this protein in response to changes in calcium levels.; pinoid-binding protein 1 (PBP1); CONTAINS InterPro DOMAIN/s: EF-Hand 1
Medtr1g060590	'30.3'	'signalling.calcium'	T
Medtr1g101330	'30.3'	'signalling.calcium'	T
Medtr2g015370	'30.3'	'signalling.calcium'	T
Medtr2g078210	'30.3'	'signalling.calcium'	petal differentiation and expansion stage; CONTAINS InterPro DOMAIN/s: IQ calmodulin-binding region (InterPro:IPR000048); BEST Arabidopsis thaliana protein match is: IQ-domain 9 (TAIR:AT2G33990.1); Has 647 Blast hits to 643 proteins in 19 species: Archae - 0; Bacteria - 0; Metazoa - 0; Fungi - 0; Plants - 647; Viruses - 0; Other Eukaryotes - 0 (source: NCBI BLink). & (reliability: 434.0) & (origi…
Medtr2g078240	'30.3'	'signalling.calcium'	plasma membrane
Medtr2g078250	'30.3'	'signalling.calcium'	plasma membrane
Medtr2g078340	'30.3'	'signalling.calcium'	plasma membrane
Medtr2g078350	'30.3'	'signalling.calcium'	plasma membrane
Medtr2g081300	'30.3'	'signalling.calcium'	likely acts upstream of PID to regulate the activity of this protein in response to changes in calcium levels.; pinoid-binding protein 1 (PBP1); CONTAINS InterPro DOMAIN/s: EF-Hand 1
Medtr2g098890	'30.3'	'signalling.calcium'	calcium-binding site (InterPro:IPR018247)
Medtr3g051770	'30.3'	'signalling.calcium'	isoform 2 (EC 2.7.11.1) (CDPK 2) - Oryza sativa (Rice) & (at3g20410 : 793.0) calmodulin-domain protein kinase CDPK isoform 9 (CPK9); calmodulin-domain protein kinase 9 (CPK9); FUNCTIONS IN: calmodulin-dependent protein kinase activity
Medtr4g087420	'30.3'	'signalling.calcium'	T
Medtr4g090970	'30.3'	'signalling.calcium'	T
Medtr4g115170	'30.3'	'signalling.calcium'	EF-Hand 1
Medtr4g127560	'30.3'	'signalling.calcium'	calcium-binding site (InterPro:IPR018247)
Medtr4g131940	'30.3'	'signalling.calcium'	binding; LOCATED IN: chloroplast; EXPRESSED IN: 13 plant structures; EXPRESSED DURING: 6 growth stages; CONTAINS InterPro DOMAIN/s: Calponin-homology (InterPro:IPR016146)
Medtr5g009830	'30.3'	'signalling.calcium'	a member of the Arabidopsis CDPK gene family. CDPKs contain an intrinsic Ca2+-activation domain with four EF hand Ca2+-binding sites. CDPKs protein kinases have been proposed to function in multiple plant signal transduction pathways downstream of [Ca2+]cyt elevations
Medtr5g015590	'30.3'	'signalling.calcium'	calmodulin binding
Medtr5g084680	'30.3'	'signalling.calcium'	T
Medtr5g089320	'30.3'	'signalling.calcium'	protein amino acid phosphorylation
Medtr6g016470	'30.3'	'signalling.calcium'	calmodulin binding; INVOLVED IN: cation transport
Medtr6g023460	'30.3'	'signalling.calcium'	calcium-binding site (InterPro:IPR018247)
Medtr6g033415	'30.3'	'signalling.calcium'	T
Medtr6g083320	'30.3'	'signalling.calcium'	T
Medtr6g083730	'30.3'	'signalling.calcium'	T
Medtr6g083810	'30.3'	'signalling.calcium'	T
Medtr7g011010	'30.3'	'signalling.calcium'	calcium-binding site (InterPro:IPR018247)
Medtr7g080370	'30.3'	'signalling.calcium'	this protein restores ER Ca2+ levels. Non-receptor component required for EFR-mediated immunity. Mutants show de-repressed anthocyanin accumulation in the presence of elf18
Medtr7g106730	'30.3'	'signalling.calcium'	a key enzyme in pathogen defense.; calcium dependent protein kinase 1 (CPK1); FUNCTIONS IN: protein binding
Medtr7g111980	'30.3'	'signalling.calcium'	incompatible interaction
Medtr7g112000	'30.3'	'signalling.calcium'	incompatible interaction
Medtr7g114130	'30.3'	'signalling.calcium'	which is a member of a newly identified class of calcium-dependent
Medtr7g115040	'30.3'	'signalling.calcium'	calcium-binding site (InterPro:IPR018247)
Medtr7g115070	'30.3'	'signalling.calcium'	T
Medtr8g045070	'30.3'	'signalling.calcium'	calmodulin binding; INVOLVED IN: defense response to bacterium
Medtr8g071330	'30.3'	'signalling.calcium'	Tetratricopeptide repeat-containing (InterPro:IPR013026)
Medtr8g074730	'30.3'	'signalling.calcium'	T
Medtr8g085900	'30.3'	'signalling.calcium'	T
Medtr8g090125	'30.3'	'signalling.calcium'	calmodulin binding; INVOLVED IN: defense response to bacterium
Medtr8g104490	'30.3'	'signalling.calcium'	T
Medtr8g104510	'30.3'	'signalling.calcium'	T
Medtr3g073100	'30.4.1'	'signalling.phosphinositides.phosphatidylinositol-4-phosphate 5-kinase'	a phosphatidylinositol-4-phosphate 5-kinase (PtdIns(4)P 5-kinase 2; or PIP5K2).; phosphatidylinositol-4-phosphate 5-kinase 2 (PIP5K2); CONTAINS InterPro DOMAIN/s: Phosphatidylinositol-4-phosphate 5-kinase
Medtr3g097260	'30.4.1'	'signalling.phosphinositides.phosphatidylinositol-4-phosphate 5-kinase'	flowers and roots. A N-terminal Membrane Occupation and Recognition Nexus (MORN)affects enzyme activity and distribution.; phosphatidylinositol-4-phosphate 5-kinase 1 (PIP5K1); CONTAINS InterPro DOMAIN/s: Phosphatidylinositol-4-phosphate 5-kinase
Medtr3g070560	'30.4.4'	'signalling.phosphinositides.phosphoinositide phospholipase C'	phosphoinositide phospholipase C activity
Medtr5g071010	'30.4.4'	'signalling.phosphinositides.phosphoinositide phospholipase C'	phospholipase C activity
Medtr1g034300	'30.5'	'signalling.G-proteins'	yeast
Medtr1g070940	'30.5'	'signalling.G-proteins'	GTPase activity; INVOLVED IN: immune response; LOCATED IN: endomembrane system; EXPRESSED IN: 22 plant structures; EXPRESSED DURING: 11 growth stages; CONTAINS InterPro DOMAIN/s: Guanylate-binding protein
Medtr1g089500	'30.5'	'signalling.G-proteins'	Rho GTPase activation protein (InterPro:IPR008936)
Medtr2g086580	'30.5'	'signalling.G-proteins'	chloroplast; EXPRESSED IN: 17 plant structures; EXPRESSED DURING: 7 growth stages; CONTAINS InterPro DOMAIN/s: PAK-box/P21-Rho-binding (InterPro:IPR000095)
Medtr2g090875	'30.5'	'signalling.G-proteins'	petal differentiation and expansion stage; CONTAINS InterPro DOMAIN/s: Ras GTPase (InterPro:IPR001806)
Medtr3g107610	'30.5'	'signalling.G-proteins'	zinc ion binding; INVOLVED IN: biological_process unknown; LOCATED IN: intracellular; EXPRESSED IN: 21 plant structures; EXPRESSED DURING: 13 growth stages; CONTAINS InterPro DOMAIN/s: Zinc finger
Medtr4g088055	'30.5'	'signalling.G-proteins'	petal differentiation and expansion stage; CONTAINS InterPro DOMAIN/s: Ras GTPase (InterPro:IPR001806)
Medtr5g092060	'30.5'	'signalling.G-proteins'	flowers
Medtr6g080710	'30.5'	'signalling.G-proteins'	A thaliana has 15 members
Medtr7g107560	'30.5'	'signalling.G-proteins'	Rho GTPase activation protein (InterPro:IPR008936)
Medtr8g026680	'30.5'	'signalling.G-proteins'	Rho GTPase activation protein (InterPro:IPR008936)
Medtr8g036080	'30.5'	'signalling.G-proteins'	ARF guanyl-nucleotide exchange factor activity
Medtr8g092890	'30.5'	'signalling.G-proteins'	signal transducer activity; INVOLVED IN: signal transduction; LOCATED IN: protein phosphatase type 2A complex
Medtr8g097200	'30.5'	'signalling.G-proteins'	cell tip growth; LOCATED IN: cytoplasm; EXPRESSED IN: 25 plant structures; EXPRESSED DURING: 15 growth stages; CONTAINS InterPro DOMAIN/s: Immunoglobulin E-set (InterPro:IPR014756)
Medtr8g103750	'30.5'	'signalling.G-proteins'	but
Medtr3g101210	'30.6'	'signalling.MAP kinases'	protein kinase activity
Medtr4g061130	'30.6'	'signalling.MAP kinases'	cold
Medtr7g072640	'30.6'	'signalling.MAP kinases'	the structural design of which is clearly distinct from those of other known protein kinases
Medtr7g072860	'30.6'	'signalling.MAP kinases'	the structural design of which is clearly distinct from those of other known protein kinases
Medtr8g098425	'30.6'	'signalling.MAP kinases'	a component of the stomatal development regulatory pathway. Mutations in this locus result in embryo lethality.; YODA (YDA); FUNCTIONS IN: protein serine/threonine kinase activity
Medtr5g044160	'30.7'	'signalling.14-3-3 proteins'	M germinated pollen stage
Medtr7g108600	'30.8'	'signalling.misc'	and is believed to play an essential role in the physiology of Arabidopsis. Consists of a single exon and is characterized by a conserved C-terminal motif and N-terminal signal peptide. Mediates Ca2+-dependent signaling.; rapid alkalinization factor 1 (RALF1); CONTAINS InterPro DOMAIN/s: Rapid ALkalinization Factor (InterPro:IPR008801); BEST Arabidopsis thaliana protein match is: ralf-like 33 (TA…
Medtr7g113080	'30.8'	'signalling.misc'	and is believed to play an essential role in the physiology of Arabidopsis. Consists of a single exon and is characterized by a conserved C-terminal motif and N-terminal signal peptide.; ralf-like 33 (RALFL33); CONTAINS InterPro DOMAIN/s: Rapid ALkalinization Factor (InterPro:IPR008801); BEST Arabidopsis thaliana protein match is: rapid alkalinization factor 23 (TAIR:AT3G16570.1); Has 30201 Blast…
Medtr5g032910	'30.99'	'signalling.unspecified'	a member of the Plant Intracellular Ras-group-related LRRs (Leucine rich repeat proteins). PIRLs are a distinct
Medtr1g008170	'31.1'	'cell.organisation'	a non-canonical small heat shock protein required for both development and thermotolerance. BOB1 is cytoplasmic at basal temperatures but forms heat shock granules containing canonical small heat shock proteins at high temperatures.; BOBBER1 (BOB1); CONTAINS InterPro DOMAIN/s: CS-like domain (InterPro:IPR007052)
Medtr1g066850	'31.1'	'cell.organisation'	T
Medtr2g082570	'31.1'	'cell.organisation'	which includes the carboxyl-terminal region of KatC. This was expressed in Escherichia coli and was shown to possess microtubule-stimulated ATPase activity.; kinesin 3 (ATK3); FUNCTIONS IN: microtubule binding
Medtr2g087840	'31.1'	'cell.organisation'	ATP binding; INVOLVED IN: microtubule-based movement; LOCATED IN: chloroplast; EXPRESSED IN: 20 plant structures; EXPRESSED DURING: 8 growth stages; CONTAINS InterPro DOMAIN/s: Kinesin
Medtr2g096010	'31.1'	'cell.organisation'	ATP binding; INVOLVED IN: microtubule-based movement; EXPRESSED IN: 23 plant structures; EXPRESSED DURING: 13 growth stages; CONTAINS InterPro DOMAIN/s: Kinesin
Medtr2g101320	'31.1'	'cell.organisation'	Ankyrin repeat (InterPro:IPR002110); BEST Arabidopsis thaliana protein match is: Ankyrin repeat family protein (TAIR:AT2G24600.4); Has 20842 Blast hits to 11682 proteins in 536 species: Archae - 22; Bacteria - 1442; Metazoa - 11586; Fungi - 1324; Plants - 2714; Viruses - 98; Other Eukaryotes - 3656 (source: NCBI BLink). & (gnl|cdd|35730 : 102.0) no description available & (gnl|cdd|29261 : 90.9) n…
Medtr2g101990	'31.1'	'cell.organisation'	ATP binding; INVOLVED IN: microtubule-based movement; LOCATED IN: nucleus
Medtr2g438440	'31.1'	'cell.organisation'	Ankyrin repeat (InterPro:IPR002110); BEST Arabidopsis thaliana protein match is: Ankyrin repeat family protein (TAIR:AT5G35810.1); Has 10613 Blast hits to 6237 proteins in 350 species: Archae - 27; Bacteria - 619; Metazoa - 5584; Fungi - 682; Plants - 1506; Viruses - 31; Other Eukaryotes - 2164 (source: NCBI BLink). & (reliability: 574.0) & (original description: no original description)'
Medtr2g438740	'31.1'	'cell.organisation'	Ankyrin repeat (InterPro:IPR002110); BEST Arabidopsis thaliana protein match is: Ankyrin repeat family protein (TAIR:AT5G35810.1); Has 10613 Blast hits to 6237 proteins in 350 species: Archae - 27; Bacteria - 619; Metazoa - 5584; Fungi - 682; Plants - 1506; Viruses - 31; Other Eukaryotes - 2164 (source: NCBI BLink). & (reliability: 570.0) & (original description: no original description)'
Medtr2g438760	'31.1'	'cell.organisation'	Ankyrin repeat (InterPro:IPR002110); BEST Arabidopsis thaliana protein match is: Ankyrin repeat family protein (TAIR:AT5G35810.1); Has 10613 Blast hits to 6237 proteins in 350 species: Archae - 27; Bacteria - 619; Metazoa - 5584; Fungi - 682; Plants - 1506; Viruses - 31; Other Eukaryotes - 2164 (source: NCBI BLink). & (reliability: 570.0) & (original description: no original description)'
Medtr3g055750	'31.1'	'cell.organisation'	Ankyrin repeat (InterPro:IPR002110); BEST Arabidopsis thaliana protein match is: Ankyrin repeat family protein (TAIR:AT5G04700.1); Has 4772 Blast hits to 3121 proteins in 218 species: Archae - 7; Bacteria - 222; Metazoa - 2187; Fungi - 197; Plants - 1396; Viruses - 2; Other Eukaryotes - 761 (source: NCBI BLink). & (reliability: 278.0) & (original description: no original description)'
Medtr3g058570	'31.1'	'cell.organisation'	Ankyrin repeat (InterPro:IPR002110); BEST Arabidopsis thaliana protein match is: Ankyrin repeat family protein (TAIR:AT5G04700.1); Has 4772 Blast hits to 3121 proteins in 218 species: Archae - 7; Bacteria - 222; Metazoa - 2187; Fungi - 197; Plants - 1396; Viruses - 2; Other Eukaryotes - 761 (source: NCBI BLink). & (reliability: 300.0) & (original description: no original description)'
Medtr3g102170	'31.1'	'cell.organisation'	motor region
Medtr3g105650	'31.1'	'cell.organisation'	Ankyrin repeat (InterPro:IPR002110); BEST Arabidopsis thaliana protein match is: Ankyrin repeat family protein (TAIR:AT5G54620.1); Has 21804 Blast hits to 10802 proteins in 484 species: Archae - 19; Bacteria - 1454; Metazoa - 11942; Fungi - 1177; Plants - 2277; Viruses - 52; Other Eukaryotes - 4883 (source: NCBI BLink). & (reliability: 552.0) & (original description: no original description)'
Medtr3g113630	'31.1'	'cell.organisation'	ATP binding; INVOLVED IN: microtubule-based movement; LOCATED IN: chloroplast; CONTAINS InterPro DOMAIN/s: Kinesin
Medtr4g013235	'31.1'	'cell.organisation'	plasma membrane
Medtr4g071210	'31.1'	'cell.organisation'	zinc ion binding
Medtr4g081390	'31.1'	'cell.organisation'	which includes the carboxyl-terminal region of KatC. This was expressed in Escherichia coli and was shown to possess microtubule-stimulated ATPase activity.; kinesin 3 (ATK3); FUNCTIONS IN: microtubule binding
Medtr4g108330	'31.1'	'cell.organisation'	Calponin-like actin-binding (InterPro:IPR001715)
Medtr4g109040	'31.1'	'cell.organisation'	actin cytoskeleton organization; EXPRESSED IN: shoot apex
Medtr4g123730	'31.1'	'cell.organisation'	POK1 and POK2 belong to the kinesin-12 class which also includes the well-characterized group of phragmoplast-associated kinesins AtPAKRPs. Both kinesins are composed of an N-terminal motor domain throughout the entire C terminus and putative cargo binding tail domains. The expression domains for POK1 constructs were more limited than those for POK2; both are expressed in tissues enriched for div…
Medtr5g025100	'31.1'	'cell.organisation'	Prismane-like (InterPro:IPR011254)
Medtr5g028130	'31.1'	'cell.organisation'	Ankyrin repeat (InterPro:IPR002110); BEST Arabidopsis thaliana protein match is: Ankyrin repeat family protein (TAIR:AT5G04700.1); Has 4772 Blast hits to 3121 proteins in 218 species: Archae - 7; Bacteria - 222; Metazoa - 2187; Fungi - 197; Plants - 1396; Viruses - 2; Other Eukaryotes - 761 (source: NCBI BLink). & (reliability: 488.0) & (original description: no original description)'
Medtr5g028690	'31.1'	'cell.organisation'	Ankyrin repeat (InterPro:IPR002110); BEST Arabidopsis thaliana protein match is: Ankyrin repeat family protein (TAIR:AT5G04700.1); Has 4772 Blast hits to 3121 proteins in 218 species: Archae - 7; Bacteria - 222; Metazoa - 2187; Fungi - 197; Plants - 1396; Viruses - 2; Other Eukaryotes - 761 (source: NCBI BLink). & (reliability: 238.0) & (original description: no original description)'
Medtr5g031470	'31.1'	'cell.organisation'	ATP binding; INVOLVED IN: microtubule-based movement; EXPRESSED IN: 20 plant structures; EXPRESSED DURING: 10 growth stages; CONTAINS InterPro DOMAIN/s: Kinesin
Medtr5g066320	'31.1'	'cell.organisation'	ATP binding; INVOLVED IN: microtubule-based movement; EXPRESSED IN: 21 plant structures; EXPRESSED DURING: 14 growth stages; CONTAINS InterPro DOMAIN/s: Kinesin
Medtr5g094160	'31.1'	'cell.organisation'	actin-binding
Medtr6g007110	'31.1'	'cell.organisation'	Tetratricopeptide-like helical (InterPro:IPR011990)
Medtr6g022830	'31.1'	'cell.organisation'	Ankyrin repeat (InterPro:IPR002110); BEST Arabidopsis thaliana protein match is: Ankyrin repeat family protein (TAIR:AT3G04140.1); Has 30372 Blast hits to 15038 proteins in 745 species: Archae - 53; Bacteria - 2422; Metazoa - 15116; Fungi - 2165; Plants - 2906; Viruses - 97; Other Eukaryotes - 7613 (source: NCBI BLink). & (gnl|cdd|29261 : 91.3) no description available & (reliability: 1152.0) & (…
Medtr6g023070	'31.1'	'cell.organisation'	Ankyrin repeat (InterPro:IPR002110); BEST Arabidopsis thaliana protein match is: Ankyrin repeat family protein (TAIR:AT3G04140.1); Has 30372 Blast hits to 15038 proteins in 745 species: Archae - 53; Bacteria - 2422; Metazoa - 15116; Fungi - 2165; Plants - 2906; Viruses - 97; Other Eukaryotes - 7613 (source: NCBI BLink). & (gnl|cdd|29261 : 90.9) no description available & (gnl|cdd|35729 : 80.8) no…
Medtr6g028030	'31.1'	'cell.organisation'	calcium ion binding; INVOLVED IN: response to water deprivation
Medtr7g052820	'31.1'	'cell.organisation'	actin-binding
Medtr7g061150	'31.1'	'cell.organisation'	T
Medtr7g075060	'31.1'	'cell.organisation'	binding
Medtr7g091290	'31.1'	'cell.organisation'	ATP binding; INVOLVED IN: microtubule-based movement; EXPRESSED IN: 19 plant structures; EXPRESSED DURING: 10 growth stages; CONTAINS InterPro DOMAIN/s: Calponin-homology (InterPro:IPR016146)
Medtr7g100730	'31.1'	'cell.organisation'	T
Medtr7g105030	'31.1'	'cell.organisation'	ATP binding; INVOLVED IN: microtubule-based movement; EXPRESSED IN: 12 plant structures; EXPRESSED DURING: 6 growth stages; CONTAINS InterPro DOMAIN/s: Kinesin
Medtr7g109130	'31.1'	'cell.organisation'	ATP binding; INVOLVED IN: microtubule-based movement; EXPRESSED IN: 21 plant structures; EXPRESSED DURING: 12 growth stages; CONTAINS InterPro DOMAIN/s: Calponin-homology (InterPro:IPR016146)
Medtr7g113520	'31.1'	'cell.organisation'	ATP binding; INVOLVED IN: microtubule-based movement; EXPRESSED IN: 15 plant structures; EXPRESSED DURING: 11 growth stages; CONTAINS InterPro DOMAIN/s: Kinesin
Medtr8g011460	'31.1'	'cell.organisation'	actin-binding
Medtr8g027385	'31.1'	'cell.organisation'	Tetratricopeptide-like helical (InterPro:IPR011990)
Medtr8g028410	'31.1'	'cell.organisation'	trichome morphogenesis; LOCATED IN: SCAR complex; EXPRESSED IN: 23 plant structures; EXPRESSED DURING: 13 growth stages; BEST Arabidopsis thaliana protein match is: ABL interactor-like protein 3 (TAIR:AT5G24310.1). & (q9axa6|abil1_orysa : 216.0) Probable protein ABIL1 (Abl interactor-like protein 1) - Oryza sativa (Rice) & (gnl|cdd|37757 : 97.9) no description available & (reliability: 524.0) & (…
Medtr8g038150	'31.1'	'cell.organisation'	they relocate to the plasma membrane.; annexin 3 (ANNAT3); FUNCTIONS IN: calcium-dependent phospholipid binding
Medtr8g038170	'31.1'	'cell.organisation'	calcium ion binding; INVOLVED IN: in 6 processes; LOCATED IN: cell surface; EXPRESSED IN: 21 plant structures; EXPRESSED DURING: 14 growth stages; CONTAINS InterPro DOMAIN/s: Annexin like protein (InterPro:IPR015472)
Medtr8g038210	'31.1'	'cell.organisation'	calcium ion binding; INVOLVED IN: response to water deprivation
Medtr8g038220	'31.1'	'cell.organisation'	calcium ion binding; INVOLVED IN: response to water deprivation
Medtr8g072510	'31.1'	'cell.organisation'	Ankyrin repeat (InterPro:IPR002110); BEST Arabidopsis thaliana protein match is: Ankyrin repeat family protein (TAIR:AT1G14480.1); Has 10084 Blast hits to 5540 proteins in 307 species: Archae - 14; Bacteria - 721; Metazoa - 5684; Fungi - 405; Plants - 1520; Viruses - 27; Other Eukaryotes - 1713 (source: NCBI BLink). & (reliability: 542.0) & (original description: no original description)'
Medtr8g104200	'31.1'	'cell.organisation'	ATP binding; INVOLVED IN: microtubule-based movement; LOCATED IN: plasma membrane; EXPRESSED IN: 24 plant structures; EXPRESSED DURING: 13 growth stages; CONTAINS InterPro DOMAIN/s: Kinesin
Medtr7g093260	'31.1.1.1.1'	'cell.organisation.cytoskeleton.actin.Actin'	structural constituent of cytoskeleton; INVOLVED IN: in 9 processes; LOCATED IN: mitochondrion
Medtr3g110720	'31.1.1.2'	'cell.organisation.cytoskeleton.mikrotubuli'	structural constituent of cytoskeleton; INVOLVED IN: response to salt stress
Medtr7g089120	'31.1.1.2'	'cell.organisation.cytoskeleton.mikrotubuli'	response to salt stress
Medtr8g085980	'31.1.1.2'	'cell.organisation.cytoskeleton.mikrotubuli'	microtubule-based process; LOCATED IN: tubulin complex
Medtr8g098360	'31.1.1.2'	'cell.organisation.cytoskeleton.mikrotubuli'	response to salt stress
Medtr4g133890	'31.1.1.2.5'	'cell.organisation.cytoskeleton.mikrotubuli.MAP70'	plant-type cell wall biogenesis
Medtr8g105350	'31.1.1.2.5'	'cell.organisation.cytoskeleton.mikrotubuli.MAP70'	plant-type cell wall biogenesis
Medtr3g085440	'31.1.1.2.6'	'cell.organisation.cytoskeleton.mikrotubuli.MAP65'	MAP65/ASE1-type (InterPro:IPR007145); BEST Arabidopsis thaliana protein match is: microtubule-associated protein 65-2 (TAIR:AT4G26760.1); Has 2013 Blast hits to 1836 proteins in 335 species: Archae - 36; Bacteria - 203; Metazoa - 697; Fungi - 206; Plants - 352; Viruses - 0; Other Eukaryotes - 519 (source: NCBI BLink). & (gnl|cdd|39503 : 338.0) no description available & (gnl|cdd|67608 : 102.0) no…
Medtr8g041400	'31.1.1.2.6'	'cell.organisation.cytoskeleton.mikrotubuli.MAP65'	MAP65/ASE1-type (InterPro:IPR007145); BEST Arabidopsis thaliana protein match is: microtubule-associated protein 65-2 (TAIR:AT4G26760.1); Has 9645 Blast hits to 7381 proteins in 767 species: Archae - 226; Bacteria - 1139; Metazoa - 4615; Fungi - 969; Plants - 706; Viruses - 30; Other Eukaryotes - 1960 (source: NCBI BLink). & (gnl|cdd|39503 : 426.0) no description available & (gnl|cdd|67608 : 159.…
Medtr2g062660	'31.1.1.3.11'	'cell.organisation.cytoskeleton.Myosin.Class XI'	Dilute (InterPro:IPR002710)
Medtr0041s0130	'31.2'	'cell.division'	AAA-type
Medtr1g107535	'31.2'	'cell.division'	C-terminal (InterPro:IPR004367)
Medtr3g085940	'31.2'	'cell.division'	T
Medtr5g033590	'31.2'	'cell.division'	T
Medtr6g068960	'31.2'	'cell.division'	but does not completely cover the 180 bp regions.; centromere protein C (CENP-C); Has 380 Blast hits to 353 proteins in 129 species: Archae - 0; Bacteria - 6; Metazoa - 108; Fungi - 26; Plants - 78; Viruses - 8; Other Eukaryotes - 154 (source: NCBI BLink). & (reliability: 192.6) & (original description: no original description)'
Medtr7g020950	'31.2'	'cell.division'	predominantly plant-based family of genes encoding RNA binding proteins with characteristic presence of a highly conserved RNA binding motif first described in the mei2 gene of the fission yeast S. pombe. In silico analyses reveal nine mei2 -like genes in A. thaliana. They were grouped into four distinct clades
Medtr7g104500	'31.2'	'cell.division'	tubulin-like proteins
Medtr2g102520	'31.3'	'cell.cycle'	C-terminal (InterPro:IPR004367)
Medtr5g015670	'31.3'	'cell.cycle'	Cyclin-like (InterPro:IPR011028)
Medtr8g063120	'31.3'	'cell.cycle'	regulation of cell cycle; LOCATED IN: nucleus; EXPRESSED IN: 23 plant structures; EXPRESSED DURING: 13 growth stages; CONTAINS InterPro DOMAIN/s: Cyclin
Medtr8g093100	'31.3'	'cell.cycle'	TSA1 and TSK relocalize to ends of spindle microtubules that are ahead of separating chromatids during metaphase and anaphase of mitosis.; TONSOKU (TSK); FUNCTIONS IN: protein binding; INVOLVED IN: G2/M transition of mitotic cell cycle
Medtr1g035360	'31.3.1'	'cell.cycle.peptidylprolyl isomerase'	plasma membrane; EXPRESSED IN: guard cell; CONTAINS InterPro DOMAIN/s: Cyclophilin-like (InterPro:IPR015891)
Medtr8g014190	'31.3.1'	'cell.cycle.peptidylprolyl isomerase'	peptidyl-prolyl cis-trans isomerase activity
Medtr1g057560	'31.4'	'cell.vesicle transport'	putative exocyst subunits
Medtr1g071260	'31.4'	'cell.vesicle transport'	multidimensional cell growth
Medtr2g070730	'31.4'	'cell.vesicle transport'	designated interactor of constitutive active ROPs 1 (ICR1)
Medtr4g099140	'31.4'	'cell.vesicle transport'	KNOLLE
Medtr4g102120	'31.4'	'cell.vesicle transport'	cytokinesis; LOCATED IN: cytosol
Medtr4g115390	'31.4'	'cell.vesicle transport'	v-SNARE protein family.; vesicle-associated membrane protein 713 (VAMP713); FUNCTIONS IN: molecular_function unknown; INVOLVED IN: response to salt stress; LOCATED IN: vacuolar membrane
Medtr4g127490	'31.4'	'cell.vesicle transport'	T
Medtr6g028140	'31.4'	'cell.vesicle transport'	cellular membrane fusion; LOCATED IN: plasma membrane; EXPRESSED IN: 10 plant structures; EXPRESSED DURING: L mature pollen stage
Medtr7g061830	'31.4'	'cell.vesicle transport'	conserved site (InterPro:IPR018494)
Medtr7g079870	'31.4'	'cell.vesicle transport'	and exocytosis in the pollen tube tip. Protein most similar to RIC2 (family subgroup V). Gene is expressed in all tissues examined.Interacts with ROP2 during pavement cell morphogenesis and with ROP1 to promote apical F-actin assembly.; ROP-interactive CRIB motif-containing protein 4 (RIC4); CONTAINS InterPro DOMAIN/s: PAK-box/P21-Rho-binding (InterPro:IPR000095); BEST Arabidopsis thaliana protei…
Medtr2g017740	'31.5.1'	'cell.cell death.plants'	as well as a spontaneous activation of expression of pathogenesis-related genes and leading to a 32-fold increase in salicylic acid (SA). CAD1 is postulated to act as a negative regulator controlling SA-mediated pathway of programmed cell death in plant immunity.; constitutively activated cell death 1 (CAD1); CONTAINS InterPro DOMAIN/s: Membrane attack complex component/perforin (MACPF) domain (I…
Medtr2g030530	'31.5.1'	'cell.cell death.plants'	defense response to bacterium
Medtr3g101400	'33.1'	'development.storage proteins'	and in membranes in infected cells. Plays a role in cell death and differentially affects the accumulation of oxylipins. Contributes to resistance to virus.; phospholipase A 2A (PLA2A); FUNCTIONS IN: lipase activity
Medtr7g090470	'33.1'	'development.storage proteins'	Protein of unknown function DUF3336 (InterPro:IPR021771)
Medtr7g094940	'33.1'	'development.storage proteins'	lipid metabolic process; LOCATED IN: cellular_component unknown; EXPRESSED IN: 18 plant structures; EXPRESSED DURING: 13 growth stages; CONTAINS InterPro DOMAIN/s: Acyl transferase/acyl hydrolase/lysophospholipase (InterPro:IPR016035)
Medtr8g007040	'33.1'	'development.storage proteins'	and in membranes in infected cells. Plays a role in cell death and differentially affects the accumulation of oxylipins. Contributes to resistance to virus.; phospholipase A 2A (PLA2A); FUNCTIONS IN: lipase activity
Medtr8g007140	'33.1'	'development.storage proteins'	Patatin (InterPro:IPR002641); BEST Arabidopsis thaliana protein match is: PATATIN-like protein 5 (TAIR:AT4G37060.1); Has 1996 Blast hits to 1989 proteins in 369 species: Archae - 0; Bacteria - 491; Metazoa - 206; Fungi - 135; Plants - 869; Viruses - 0; Other Eukaryotes - 295 (source: NCBI BLink). & (p11768|pat3_soltu : 219.0) Patatin class 1 precursor (Patatin class I) (Potato tuber protein) - So…
Medtr4g059670	'33.2'	'development.late embryogenesis abundant'	T
Medtr4g109770	'33.3'	'development.squamosa promoter binding like (SPL)'	sequence-specific DNA binding transcription factor activity; INVOLVED IN: regulation of transcription; LOCATED IN: nucleus; EXPRESSED IN: 14 plant structures; EXPRESSED DURING: 6 growth stages; CONTAINS InterPro DOMAIN/s: Transcription factor
Medtr8g096780	'33.3'	'development.squamosa promoter binding like (SPL)'	sequence-specific DNA binding transcription factor activity; INVOLVED IN: regulation of transcription; LOCATED IN: nucleus; CONTAINS InterPro DOMAIN/s: Transcription factor
Medtr0286s0040	'33.99'	'development.unspecified'	class 3 (InterPro:IPR002921); BEST Arabidopsis thaliana protein match is: alpha/beta-Hydrolases superfamily protein (TAIR:AT3G52430.1); Has 224 Blast hits to 223 proteins in 35 species: Archae - 0; Bacteria - 4; Metazoa - 0; Fungi - 0; Plants - 205; Viruses - 0; Other Eukaryotes - 15 (source: NCBI BLink). & (reliability: 338.0) & (original description: no original description)'
Medtr1g010140	'33.99'	'development.unspecified'	T
Medtr1g018590	'33.99'	'development.unspecified'	catalytic activity; INVOLVED IN: xylem and phloem pattern formation
Medtr1g023180	'33.99'	'development.unspecified'	predicted integral membrane protein and is a member of the Plant-Drug/Metabolite Exporter (P-DME) family (Transporter Classification number: TC 2.A.7.3).; Walls Are Thin 1 (WAT1); CONTAINS InterPro DOMAIN/s: Protein of unknown function DUF6
Medtr1g030580	'33.99'	'development.unspecified'	transmembrane (InterPro:IPR000620); BEST Arabidopsis thaliana protein match is: nodulin MtN21 /EamA-like transporter family protein (TAIR:AT4G08300.1); Has 4156 Blast hits to 4146 proteins in 764 species: Archae - 34; Bacteria - 2214; Metazoa - 4; Fungi - 0; Plants - 1218; Viruses - 0; Other Eukaryotes - 686 (source: NCBI BLink). & (reliability: 882.0) & (original description: no original descrip…
Medtr1g054335	'33.99'	'development.unspecified'	protein ubiquitination
Medtr1g090310	'33.99'	'development.unspecified'	WD40 repeat (InterPro:IPR001680)
Medtr1g096430	'33.99'	'development.unspecified'	cytokinin and brassinosteroids.; vascular related NAC-domain protein 7 (VND7); CONTAINS InterPro DOMAIN/s: No apical meristem (NAM) protein (InterPro:IPR003441); BEST Arabidopsis thaliana protein match is: vascular related NAC-domain protein 1 (TAIR:AT2G18060.1); Has 3020 Blast hits to 3015 proteins in 84 species: Archae - 0; Bacteria - 0; Metazoa - 2; Fungi - 0; Plants - 3006; Viruses - 0; Other…
Medtr2g007970	'33.99'	'development.unspecified'	leaf whorl
Medtr2g007990	'33.99'	'development.unspecified'	leaf whorl
Medtr2g016710	'33.99'	'development.unspecified'	membrane; EXPRESSED IN: 19 plant structures; EXPRESSED DURING: 9 growth stages; CONTAINS InterPro DOMAIN/s: Protein of unknown function DUF6
Medtr2g056130	'33.99'	'development.unspecified'	integral to membrane; EXPRESSED IN: 7 plant structures; EXPRESSED DURING: L mature pollen stage
Medtr2g062730	'33.99'	'development.unspecified'	and SMB in turn represses FEZ expression in these cells
Medtr2g090735	'33.99'	'development.unspecified'	T
Medtr2g103670	'33.99'	'development.unspecified'	(ATS3); FUNCTIONS IN: molecular_function unknown; INVOLVED IN: biological_process unknown; LOCATED IN: plasma membrane
Medtr2g436310	'33.99'	'development.unspecified'	integral to membrane
Medtr4g036030	'33.99'	'development.unspecified'	T
Medtr4g073530	'33.99'	'development.unspecified'	drought
Medtr4g073690	'33.99'	'development.unspecified'	Major facilitator superfamily
Medtr4g075980	'33.99'	'development.unspecified'	the ONAC022 subfamily. Involved in leaf and inflorescence stem morphogenesis.; NAC domain containing protein 36 (NAC036); CONTAINS InterPro DOMAIN/s: No apical meristem (NAM) protein (InterPro:IPR003441); BEST Arabidopsis thaliana protein match is: NAC domain containing protein 35 (TAIR:AT2G02450.2); Has 2865 Blast hits to 2857 proteins in 76 species: Archae - 0; Bacteria - 2; Metazoa - 0; Fungi …
Medtr4g083610	'33.99'	'development.unspecified'	Stem cell self-renewal protein Piwi (InterPro:IPR003165)
Medtr4g091100	'33.99'	'development.unspecified'	T
Medtr4g101650	'33.99'	'development.unspecified'	though it lacks the copper-binding domains. The protein is glycosylated and GPI-anchored. It is localized to the plasma membrane and the cell wall. The gene is expressed most strongly in expanding tissues.; SKU5; FUNCTIONS IN: oxidoreductase activity
Medtr4g101680	'33.99'	'development.unspecified'	T
Medtr5g012080	'33.99'	'development.unspecified'	T
Medtr5g032720	'33.99'	'development.unspecified'	drug transmembrane transporter activity
Medtr5g090570	'33.99'	'development.unspecified'	Major facilitator superfamily MFS-1 (InterPro:IPR011701)
Medtr6g007743	'33.99'	'development.unspecified'	membrane; EXPRESSED IN: 23 plant structures; EXPRESSED DURING: 13 growth stages; CONTAINS InterPro DOMAIN/s: Protein of unknown function DUF6
Medtr6g007975	'33.99'	'development.unspecified'	class 3 (InterPro:IPR002921); BEST Arabidopsis thaliana protein match is: alpha/beta-Hydrolases superfamily protein (TAIR:AT3G52430.1); Has 224 Blast hits to 223 proteins in 35 species: Archae - 0; Bacteria - 4; Metazoa - 0; Fungi - 0; Plants - 205; Viruses - 0; Other Eukaryotes - 15 (source: NCBI BLink). & (reliability: 582.0) & (original description: no original description)'
Medtr6g007980	'33.99'	'development.unspecified'	class 3 (InterPro:IPR002921); BEST Arabidopsis thaliana protein match is: alpha/beta-Hydrolases superfamily protein (TAIR:AT3G52430.1); Has 224 Blast hits to 223 proteins in 35 species: Archae - 0; Bacteria - 4; Metazoa - 0; Fungi - 0; Plants - 205; Viruses - 0; Other Eukaryotes - 15 (source: NCBI BLink). & (reliability: 596.0) & (original description: no original description)'
Medtr6g061710	'33.99'	'development.unspecified'	two of which (TBR/AT5G06700 and TBL3/AT5G01360) have been shown to be involved in the synthesis and deposition of secondary wall cellulose
Medtr6g070890	'33.99'	'development.unspecified'	spermine and during senescence. The gene product is localized to the chloroplast.; YELLOW-LEAF-SPECIFIC GENE 9 (YLS9); FUNCTIONS IN: molecular_function unknown; INVOLVED IN: defense response to virus
Medtr6g070900	'33.99'	'development.unspecified'	spermine and during senescence. The gene product is localized to the chloroplast.; YELLOW-LEAF-SPECIFIC GENE 9 (YLS9); FUNCTIONS IN: molecular_function unknown; INVOLVED IN: defense response to virus
Medtr6g071400	'33.99'	'development.unspecified'	spermine and during senescence. The gene product is localized to the chloroplast.; YELLOW-LEAF-SPECIFIC GENE 9 (YLS9); FUNCTIONS IN: molecular_function unknown; INVOLVED IN: defense response to virus
Medtr6g071410	'33.99'	'development.unspecified'	spermine and during senescence. The gene product is localized to the chloroplast.; YELLOW-LEAF-SPECIFIC GENE 9 (YLS9); FUNCTIONS IN: molecular_function unknown; INVOLVED IN: defense response to virus
Medtr7g018170	'33.99'	'development.unspecified'	zinc ion binding; INVOLVED IN: circadian rhythm
Medtr7g024290	'33.99'	'development.unspecified'	zinc ion binding; INVOLVED IN: multicellular organismal development
Medtr7g090180	'33.99'	'development.unspecified'	4 anthesis
Medtr7g090190	'33.99'	'development.unspecified'	4 anthesis
Medtr8g024480	'33.99'	'development.unspecified'	T
Medtr8g038370	'33.99'	'development.unspecified'	zinc ion binding; INVOLVED IN: multicellular organismal development
Medtr8g042490	'33.99'	'development.unspecified'	integral to membrane
Medtr8g066790	'33.99'	'development.unspecified'	one of 17 members found in Arabidopsis. Double mutant analysis showed that TRN1 and TRN2 act in the same pathway. Required for the maintenance of both the radial pattern of tissue differentiation in the root and for the subsequent circumferential pattern within the epidermis.; TORNADO 2 (TRN2); FUNCTIONS IN: molecular_function unknown; INVOLVED IN: radial pattern formation
Medtr8g087400	'33.99'	'development.unspecified'	plant (InterPro:IPR006943); BEST Arabidopsis thaliana protein match is: Plant protein of unknown function (DUF641) (TAIR:AT3G14870.3); Has 320 Blast hits to 319 proteins in 42 species: Archae - 0; Bacteria - 33; Metazoa - 5; Fungi - 2; Plants - 274; Viruses - 0; Other Eukaryotes - 6 (source: NCBI BLink). & (gnl|cdd|68434 : 150.0) no description available & (ipr006943 : 106.38095) Domain of unknow…
Medtr2g094640	'34'	'transport'	T
Medtr4g058860	'34'	'transport'	T
Medtr2g099690	'34.1'	'transport.p- and v-ATPases'	coupled to transmembrane movement of ions
Medtr2g449840	'34.1'	'transport.p- and v-ATPases'	metabolic process
Medtr4g061090	'34.1'	'transport.p- and v-ATPases'	vacuole; EXPRESSED IN: 25 plant structures; EXPRESSED DURING: 13 growth stages; CONTAINS InterPro DOMAIN/s: ATPase
Medtr6g006910	'34.1'	'transport.p- and v-ATPases'	coupled to transmembrane movement of ions
Medtr7g086110	'34.1'	'transport.p- and v-ATPases'	membrane; EXPRESSED IN: 24 plant structures; EXPRESSED DURING: 15 growth stages; CONTAINS InterPro DOMAIN/s: Protein of unknown function DUF284
Medtr7g101170	'34.1'	'transport.p- and v-ATPases'	rotational mechanism; INVOLVED IN: ATP hydrolysis coupled proton transport; LOCATED IN: plasma membrane
Medtr8g099190	'34.1.1'	'transport.p- and v-ATPases.H+-transporting two-sector ATPase'	rotational mechanism; INVOLVED IN: in 7 processes; LOCATED IN: in 7 components; EXPRESSED IN: 27 plant structures; EXPRESSED DURING: 18 growth stages; CONTAINS InterPro DOMAIN/s: ATPase
Medtr3g099740	'34.10'	'transport.nucleotides'	a purine transporter. May be involved in the transport of purine and purine derivatives such as cytokinins
Medtr4g065640	'34.12'	'transport.metal'	transmembrane transport; LOCATED IN: endomembrane system
Medtr4g127580	'34.12'	'transport.metal'	a P1B-type ATPases transport zinc; heavy metal atpase 2 (HMA2); CONTAINS InterPro DOMAIN/s: Heavy metal transport/detoxification protein (InterPro:IPR006121)
Medtr8g046550	'34.12'	'transport.metal'	transmembrane transport; LOCATED IN: membrane; EXPRESSED IN: 20 plant structures; EXPRESSED DURING: 7 growth stages; CONTAINS InterPro DOMAIN/s: Cation efflux protein (InterPro:IPR002524); BEST Arabidopsis thaliana protein match is: Cation efflux family protein (TAIR:AT1G79520.1); Has 5067 Blast hits to 5063 proteins in 1838 species: Archae - 163; Bacteria - 4116; Metazoa - 44; Fungi - 281; Plant…
Medtr1g026740	'34.13'	'transport.peptides and oligopeptides'	Major facilitator superfamily
Medtr1g041815	'34.13'	'transport.peptides and oligopeptides'	virulent bacterial pathogens
Medtr1g041875	'34.13'	'transport.peptides and oligopeptides'	virulent bacterial pathogens
Medtr3g112460	'34.13'	'transport.peptides and oligopeptides'	suggesting that PTR1 plays a role in dipeptide uptake in the roots. Furthermore N content of ptr1 mutants is lower than that of wild type plants when grown with Pro-Ala or a mixture of dipeptides as nitrogen source; peptide transporter 1 (PTR1); FUNCTIONS IN: dipeptide transporter activity
Medtr4g033385	'34.13'	'transport.peptides and oligopeptides'	conserved site (InterPro:IPR018456)
Medtr4g033395	'34.13'	'transport.peptides and oligopeptides'	conserved site (InterPro:IPR018456)
Medtr4g107510	'34.13'	'transport.peptides and oligopeptides'	response to karrikin; LOCATED IN: plasma membrane
Medtr4g133968	'34.13'	'transport.peptides and oligopeptides'	OPT1/isp4 (InterPro:IPR004648)
Medtr7g006540	'34.13'	'transport.peptides and oligopeptides'	conserved site (InterPro:IPR018456)
Medtr7g088790	'34.13'	'transport.peptides and oligopeptides'	Major facilitator superfamily
Medtr7g111260	'34.13'	'transport.peptides and oligopeptides'	response to nematode; LOCATED IN: plasma membrane
Medtr2g011580	'34.14'	'transport.unspecified cations'	pyrimidine nucleoside transport; LOCATED IN: plasma membrane; CONTAINS InterPro DOMAIN/s: Delayed-early response protein/equilibrative nucleoside transporter (InterPro:IPR002259)
Medtr4g030210	'34.14'	'transport.unspecified cations'	sugar:hydrogen symporter activity; INVOLVED IN: transport
Medtr4g114710	'34.14'	'transport.unspecified cations'	T
Medtr2g006870	'34.15'	'transport.potassium'	a photosynthate- and light-dependent inward rectifying potassium channel with unique gating properties that are regulated by phosphorylation. Expressed in guard cell protoplasts and in the phloem and xylem of aerial portions of the plant. The channel can coassemble with another K+ channel
Medtr5g071827	'34.15'	'transport.potassium'	kup (InterPro:IPR018519)
Medtr5g071860	'34.15'	'transport.potassium'	kup (InterPro:IPR018519)
Medtr6g007697	'34.15'	'transport.potassium'	kup (InterPro:IPR018519)
Medtr8g046440	'34.15'	'transport.potassium'	KAT1 is recycled back to the plasma membrane. KAT1 is localized within 0.5??0.6 &#956;m diameter microdomains at the plasma membrane surface. KAT1 belongs to the Shaker family K+ channel. This family includes five groups based on phylogenetic analysis (FEBS Letters (2007) 581: 2357): I (inward rectifying channel): AKT1 (AT2G26650)
Medtr1g050525	'34.16'	'transport.ABC transporters and multidrug resistance systems'	coupled to transmembrane movement of substances; LOCATED IN: plasma membrane; EXPRESSED IN: 24 plant structures; EXPRESSED DURING: 13 growth stages; CONTAINS InterPro DOMAIN/s: ATPase
Medtr1g054935	'34.16'	'transport.ABC transporters and multidrug resistance systems'	coupled to transmembrane movement of substances; LOCATED IN: plasma membrane; EXPRESSED IN: 23 plant structures; EXPRESSED DURING: 13 growth stages; CONTAINS InterPro DOMAIN/s: ATPase
Medtr1g088680	'34.16'	'transport.ABC transporters and multidrug resistance systems'	fluxofenim and fenclorim.; multidrug resistance-associated protein 4 (MRP4); FUNCTIONS IN: ATPase activity
Medtr1g094660	'34.16'	'transport.ABC transporters and multidrug resistance systems'	coupled to transmembrane movement of substances; LOCATED IN: plasma membrane; EXPRESSED IN: 23 plant structures; EXPRESSED DURING: 13 growth stages; CONTAINS InterPro DOMAIN/s: ATPase
Medtr1g096580	'34.16'	'transport.ABC transporters and multidrug resistance systems'	AAA+ type
Medtr1g115790	'34.16'	'transport.ABC transporters and multidrug resistance systems'	coupled to transmembrane movement of substances; INVOLVED IN: response to nematode; LOCATED IN: plasma membrane; EXPRESSED IN: 15 plant structures; EXPRESSED DURING: 4 anthesis
Medtr1g492950	'34.16'	'transport.ABC transporters and multidrug resistance systems'	coupled to transmembrane movement of substances; LOCATED IN: plasma membrane; EXPRESSED IN: 24 plant structures; EXPRESSED DURING: 13 growth stages; CONTAINS InterPro DOMAIN/s: ATPase
Medtr2g102660	'34.16'	'transport.ABC transporters and multidrug resistance systems'	flowers
Medtr2g102670	'34.16'	'transport.ABC transporters and multidrug resistance systems'	flowers
Medtr3g011820	'34.16'	'transport.ABC transporters and multidrug resistance systems'	AAA+ type
Medtr4g076940	'34.16'	'transport.ABC transporters and multidrug resistance systems'	coupled to transmembrane movement of substances; INVOLVED IN: response to karrikin; LOCATED IN: membrane; EXPRESSED IN: 7 plant structures; EXPRESSED DURING: 6 growth stages; CONTAINS InterPro DOMAIN/s: ATPase
Medtr4g076970	'34.16'	'transport.ABC transporters and multidrug resistance systems'	coupled to transmembrane movement of substances; INVOLVED IN: response to karrikin; LOCATED IN: membrane; EXPRESSED IN: 7 plant structures; EXPRESSED DURING: 6 growth stages; CONTAINS InterPro DOMAIN/s: ATPase
Medtr4g094060	'34.16'	'transport.ABC transporters and multidrug resistance systems'	that is required for cutin transport to the extracellular matrix.; white-brown complex homolog protein 11 (WBC11); FUNCTIONS IN: ATPase activity
Medtr4g113070	'34.16'	'transport.ABC transporters and multidrug resistance systems'	coupled to transmembrane movement of substances; INVOLVED IN: drug transmembrane transport; LOCATED IN: membrane; EXPRESSED IN: 23 plant structures; EXPRESSED DURING: 13 growth stages; CONTAINS InterPro DOMAIN/s: ATPase
Medtr4g123990	'34.16'	'transport.ABC transporters and multidrug resistance systems'	coupled to transmembrane movement of substances; INVOLVED IN: transport
Medtr4g124040	'34.16'	'transport.ABC transporters and multidrug resistance systems'	coupled to transmembrane movement of substances; INVOLVED IN: transport
Medtr5g010830	'34.16'	'transport.ABC transporters and multidrug resistance systems'	drug transmembrane transporter activity
Medtr5g094810	'34.16'	'transport.ABC transporters and multidrug resistance systems'	ATPase activity
Medtr5g094820	'34.16'	'transport.ABC transporters and multidrug resistance systems'	ATPase activity
Medtr5g094830	'34.16'	'transport.ABC transporters and multidrug resistance systems'	ATPase activity
Medtr6g011680	'34.16'	'transport.ABC transporters and multidrug resistance systems'	partially overlapping functions with the ABC transporter encoded by AtPGP1.; ATP binding cassette subfamily B19 (ABCB19); FUNCTIONS IN: ATPase activity
Medtr6g034230	'34.16'	'transport.ABC transporters and multidrug resistance systems'	coupled to transmembrane movement of substances; INVOLVED IN: transport
Medtr6g034265	'34.16'	'transport.ABC transporters and multidrug resistance systems'	coupled to transmembrane movement of substances; INVOLVED IN: transport
Medtr6g034350	'34.16'	'transport.ABC transporters and multidrug resistance systems'	coupled to transmembrane movement of substances; INVOLVED IN: transport
Medtr6g034755	'34.16'	'transport.ABC transporters and multidrug resistance systems'	coupled to transmembrane movement of substances; INVOLVED IN: transport
Medtr6g066240	'34.16'	'transport.ABC transporters and multidrug resistance systems'	that is required for cutin transport to the extracellular matrix.; white-brown complex homolog protein 11 (WBC11); FUNCTIONS IN: ATPase activity
Medtr6g088805	'34.16'	'transport.ABC transporters and multidrug resistance systems'	drug transmembrane transporter activity
Medtr8g014360	'34.16'	'transport.ABC transporters and multidrug resistance systems'	the protein concentrated at infection sites. Contributes to nonhost resistance to inappropriate pathogens that enter by direct penetration in a salicylic acid??dependent manner. Required for mlo resistance. Has Cd transporter activity (Cd2+ extrusion pump) and contributes to heavy metal resistance.; PENETRATION 3 (PEN3); FUNCTIONS IN: ATPase activity
Medtr8g016070	'34.16'	'transport.ABC transporters and multidrug resistance systems'	AAA+ type
Medtr8g066690	'34.16'	'transport.ABC transporters and multidrug resistance systems'	coupled to transmembrane movement of substances; INVOLVED IN: transport
Medtr8g066710	'34.16'	'transport.ABC transporters and multidrug resistance systems'	coupled to transmembrane movement of substances; INVOLVED IN: transport
Medtr8g080050	'34.16'	'transport.ABC transporters and multidrug resistance systems'	ATPase activity
Medtr3g107730	'34.18'	'transport.unspecified anions'	membrane; CONTAINS InterPro DOMAIN/s: Bicarbonate transporter
Medtr2g094270	'34.19.1'	'transport.Major Intrinsic Proteins.PIP'	hydrogen peroxide transmembrane transport; LOCATED IN: integral to membrane
Medtr4g059390	'34.19.1'	'transport.Major Intrinsic Proteins.PIP'	response to salt stress
Medtr4g415300	'34.19.1'	'transport.Major Intrinsic Proteins.PIP'	transport; LOCATED IN: membrane; EXPRESSED IN: 23 plant structures; EXPRESSED DURING: 13 growth stages; CONTAINS InterPro DOMAIN/s: Major intrinsic protein
Medtr1g006490	'34.19.2'	'transport.Major Intrinsic Proteins.TIP'	transmembrane transport; LOCATED IN: plant-type vacuole membrane
Medtr7g103030	'34.19.2'	'transport.Major Intrinsic Proteins.TIP'	which functions as water channel. It has also been shown to be able to facilitate the transport of urea and hydrogen peroxide. Highly expressed in vascular tissues of the root
Medtr8g013680	'34.19.2'	'transport.Major Intrinsic Proteins.TIP'	functions as a water channel and ammonium (NH3) transporter. Highly expressed in flower
Medtr7g010650	'34.19.3'	'transport.Major Intrinsic Proteins.NIP'	arsenite transmembrane transporter activity; INVOLVED IN: transport
Medtr8g087710	'34.19.3'	'transport.Major Intrinsic Proteins.NIP'	arsenite transmembrane transporter activity; INVOLVED IN: transport
Medtr1g022315	'34.2'	'transport.sugars'	sugar:hydrogen symporter activity; INVOLVED IN: transport
Medtr2g013310	'34.2'	'transport.sugars'	sugar:hydrogen symporter activity; INVOLVED IN: transport
Medtr2g038410	'34.2'	'transport.sugars'	T
Medtr3g008160	'34.2'	'transport.sugars'	sugar:hydrogen symporter activity; INVOLVED IN: transport
Medtr3g008170	'34.2'	'transport.sugars'	sugar:hydrogen symporter activity; INVOLVED IN: transport
Medtr4g091370	'34.2'	'transport.sugars'	sugar:hydrogen symporter activity; INVOLVED IN: transport
Medtr5g006070	'34.2'	'transport.sugars'	hexose-specific/H+ symporter activity. The activity of the transporter appears to be negatively regulated by phosphorylation. Importantly
Medtr5g094760	'34.2'	'transport.sugars'	sugar:hydrogen symporter activity; INVOLVED IN: transport
Medtr7g094450	'34.2'	'transport.sugars'	sugar:hydrogen symporter activity; INVOLVED IN: transport
Medtr4g131920	'34.2.1'	'transport.sugars.sucrose'	sugar:hydrogen symporter activity
Medtr6g033580	'34.2.1'	'transport.sugars.sucrose'	AtSUC2 can also transport a wide range of physiological and synthetic glucose conjugates with both &#945;- or &#946;-linkage.; sucrose-proton symporter 2 (SUC2); CONTAINS InterPro DOMAIN/s: Sucrose/H+ symporter
Medtr4g107840	'34.20'	'transport.porins'	AT5G67500/VDAC2
Medtr3g082180	'34.21'	'transport.calcium'	calcium:cation antiporter activity; INVOLVED IN: cation transport
Medtr6g027580	'34.21'	'transport.calcium'	calcium:sodium antiporter activity; INVOLVED IN: cation transport
Medtr8g027160	'34.21'	'transport.calcium'	catalyzes the efflux of calcium from the cytoplasm.; ER-type Ca2+-ATPase 2 (ECA2); FUNCTIONS IN: calcium-transporting ATPase activity; INVOLVED IN: calcium ion transport; LOCATED IN: integral to membrane
Medtr1g028370	'34.22'	'transport.cyclic nucleotide or calcium regulated channels'	cyclic nucleotide binding
Medtr2g081110	'34.22'	'transport.cyclic nucleotide or calcium regulated channels'	downstream component of the signaling pathways leading to HR resistance. mutant plants exhibit gene-for-gene disease resistance against avirulent Pseudomonas syringae despite the near-complete absence of the hypersensitive response (HR). Salicylic acid accumulation in dnd2 mutants is completely PAD4-independent.; cyclic nucleotide-gated cation channel 4 (CNGC4); FUNCTIONS IN: cation transmembrane…
Medtr2g094860	'34.22'	'transport.cyclic nucleotide or calcium regulated channels'	calmodulin binding
Medtr6g075290	'34.22'	'transport.cyclic nucleotide or calcium regulated channels'	member of a family of cyclic nucleotide gated channels.; cyclic nucleotide-binding transporter 1 (CNBT1); FUNCTIONS IN: ion channel activity
Medtr6g075410	'34.22'	'transport.cyclic nucleotide or calcium regulated channels'	member of a family of cyclic nucleotide gated channels.; cyclic nucleotide-binding transporter 1 (CNBT1); FUNCTIONS IN: ion channel activity
Medtr6g075440	'34.22'	'transport.cyclic nucleotide or calcium regulated channels'	member of a family of cyclic nucleotide gated channels.; cyclic nucleotide-binding transporter 1 (CNBT1); FUNCTIONS IN: ion channel activity
Medtr1g081240	'34.23.1'	'transport.hormones.auxin'	Ndr (InterPro:IPR004142); BEST Arabidopsis thaliana protein match is: N-MYC downregulated-like 3 (TAIR:AT2G19620.1); Has 776 Blast hits to 775 proteins in 111 species: Archae - 2; Bacteria - 48; Metazoa - 563; Fungi - 0; Plants - 132; Viruses - 0; Other Eukaryotes - 31 (source: NCBI BLink). & (o23969|sf21_helan : 320.0) Pollen-specific protein SF21 - Helianthus annuus (Common sunflower) & (gnl|cd…
Medtr2g031750	'34.3'	'transport.amino acids'	transmembrane (InterPro:IPR013057); BEST Arabidopsis thaliana protein match is: amino acid permease 1 (TAIR:AT1G58360.1); Has 2959 Blast hits to 2943 proteins in 246 species: Archae - 0; Bacteria - 24; Metazoa - 771; Fungi - 529; Plants - 1378; Viruses - 0; Other Eukaryotes - 257 (source: NCBI BLink). & (gnl|cdd|36517 : 202.0) no description available & (gnl|cdd|85489 : 167.0) no description avai…
Medtr2g096830	'34.3'	'transport.amino acids'	a high-affinity transporter for cellular amino acid uptake in both root epidermis and leaf mesophyll.; lysine histidine transporter 1; FUNCTIONS IN: amino acid transmembrane transporter activity; INVOLVED IN: amino acid transport
Medtr3g033730	'34.3'	'transport.amino acids'	membrane; EXPRESSED IN: 19 plant structures; EXPRESSED DURING: 9 growth stages; CONTAINS InterPro DOMAIN/s: Amino acid transporter
Medtr3g110420	'34.3'	'transport.amino acids'	transmembrane (InterPro:IPR013057); BEST Arabidopsis thaliana protein match is: amino acid permease 1 (TAIR:AT1G58360.1); Has 2959 Blast hits to 2943 proteins in 246 species: Archae - 0; Bacteria - 24; Metazoa - 771; Fungi - 529; Plants - 1378; Viruses - 0; Other Eukaryotes - 257 (source: NCBI BLink). & (gnl|cdd|36517 : 205.0) no description available & (gnl|cdd|85489 : 192.0) no description avai…
Medtr3g110660	'34.3'	'transport.amino acids'	neutral amino acid transmembrane transporter activity
Medtr4g073770	'34.3'	'transport.amino acids'	a member of the AUX1 LAX family of auxin influx carriers. Required for the establishment of embryonic root cell organization.; like AUXIN RESISTANT 2 (LAX2); CONTAINS InterPro DOMAIN/s: Amino acid transporter
Medtr4g075750	'34.3'	'transport.amino acids'	membrane; EXPRESSED IN: 20 plant structures; EXPRESSED DURING: 13 growth stages; CONTAINS InterPro DOMAIN/s: Amino acid transporter
Medtr6g022790	'34.3'	'transport.amino acids'	a high-affinity transporter for cellular amino acid uptake in both root epidermis and leaf mesophyll.; lysine histidine transporter 1; FUNCTIONS IN: amino acid transmembrane transporter activity; INVOLVED IN: amino acid transport
Medtr7g038910	'34.3'	'transport.amino acids'	a high-affinity transporter for cellular amino acid uptake in both root epidermis and leaf mesophyll.; lysine histidine transporter 1; FUNCTIONS IN: amino acid transmembrane transporter activity; INVOLVED IN: amino acid transport
Medtr7g089905	'34.3'	'transport.amino acids'	membrane; EXPRESSED IN: 24 plant structures; EXPRESSED DURING: 13 growth stages; CONTAINS InterPro DOMAIN/s: Amino acid transporter
Medtr7g089920	'34.3'	'transport.amino acids'	membrane; EXPRESSED IN: 24 plant structures; EXPRESSED DURING: 13 growth stages; CONTAINS InterPro DOMAIN/s: Amino acid transporter
Medtr4g114340	'34.4'	'transport.nitrate'	response to wounding; LOCATED IN: membrane; EXPRESSED IN: 22 plant structures; EXPRESSED DURING: 13 growth stages; CONTAINS InterPro DOMAIN/s: PTR2 family proton/oligopeptide symporter
Medtr1g045550	'34.5'	'transport.ammonium'	transport
Medtr4g017820	'34.5'	'transport.ammonium'	which is expressed in shoot and root. Expression in root and shoot is under nitrogen and carbon dioxide regulation
Medtr3g087740	'34.6'	'transport.sulphate'	where it is induced by sulfur starvation. Expression in the shoot vascular system is not induced by sulfur starvation.; slufate transporter 2;1 (SULTR2;1); FUNCTIONS IN: sulfate transmembrane transporter activity; INVOLVED IN: sulfate transport; LOCATED IN: integral to membrane
Medtr6g086170	'34.6'	'transport.sulphate'	transport
Medtr7g095430	'34.6'	'transport.sulphate'	transporter activity
Medtr5g042150	'34.7'	'transport.phosphate'	plasma membrane; EXPRESSED IN: stem
Medtr7g011330	'34.7'	'transport.phosphate'	M germinated pollen stage
Medtr2g022700	'34.8'	'transport.metabolite transporters at the envelope membrane'	glucose-6-phosphate transmembrane transporter activity; INVOLVED IN: in 7 processes; LOCATED IN: plasma membrane; EXPRESSED IN: 16 plant structures; EXPRESSED DURING: 10 growth stages; CONTAINS InterPro DOMAIN/s: Tpt phosphate/phosphoenolpyruvate translocator (InterPro:IPR004696)
Medtr5g081710	'34.8'	'transport.metabolite transporters at the envelope membrane'	membrane; EXPRESSED IN: 19 plant structures; EXPRESSED DURING: 11 growth stages; CONTAINS InterPro DOMAIN/s: Protein of unknown function DUF6
Medtr6g005480	'34.8'	'transport.metabolite transporters at the envelope membrane'	chloroplast
Medtr2g102010	'34.9'	'transport.metabolite transporters at the mitochondrial membrane'	Mitochondrial substrate carrier (InterPro:IPR001993)
Medtr4g049640	'34.9'	'transport.metabolite transporters at the mitochondrial membrane'	it can complement a slac1-2 mutant suggesting that it performs a similar function. SLAH1:GFP localizes to the plasma membrane.; SLAC1 homologue 1 (SLAH1); CONTAINS InterPro DOMAIN/s: C4-dicarboxylate transporter/malic acid transport protein (InterPro:IPR004695); BEST Arabidopsis thaliana protein match is: SLAC1 homologue 4 (TAIR:AT1G62262.1); Has 719 Blast hits to 716 proteins in 282 species: Arc…
Medtr2g016460	'34.99'	'transport.misc'	transmembrane transport; LOCATED IN: membrane; EXPRESSED IN: 18 plant structures; EXPRESSED DURING: 11 growth stages; CONTAINS InterPro DOMAIN/s: Xanthine/uracil/vitamin C permease (InterPro:IPR006043); BEST Arabidopsis thaliana protein match is: Xanthine/uracil permease family protein (TAIR:AT2G05760.1); Has 8712 Blast hits to 8692 proteins in 1893 species: Archae - 67; Bacteria - 7003; Metazoa …
Medtr2g079030	'34.99'	'transport.misc'	protects roots from inhibitory compounds.; ABERRANT LATERAL ROOT FORMATION 5 (ALF5); FUNCTIONS IN: antiporter activity
Medtr2g084895	'34.99'	'transport.misc'	transmembrane transport; LOCATED IN: plasma membrane
Medtr2g435930	'34.99'	'transport.misc'	drug transmembrane transporter activity
Medtr3g078270	'34.99'	'transport.misc'	transmembrane transport; LOCATED IN: membrane; EXPRESSED IN: 23 plant structures; EXPRESSED DURING: 13 growth stages; CONTAINS InterPro DOMAIN/s: Xanthine/uracil/vitamin C permease (InterPro:IPR006043); BEST Arabidopsis thaliana protein match is: Xanthine/uracil permease family protein (TAIR:AT5G49990.1); Has 9225 Blast hits to 9208 proteins in 1898 species: Archae - 67; Bacteria - 7527; Metazoa …
Medtr3g080390	'34.99'	'transport.misc'	transmembrane transport; LOCATED IN: membrane; EXPRESSED IN: 22 plant structures; EXPRESSED DURING: 13 growth stages; CONTAINS InterPro DOMAIN/s: Xanthine/uracil/vitamin C permease (InterPro:IPR006043); BEST Arabidopsis thaliana protein match is: Xanthine/uracil permease family protein (TAIR:AT2G34190.1); Has 8976 Blast hits to 8949 proteins in 1902 species: Archae - 67; Bacteria - 7337; Metazoa …
Medtr4g055290	'34.99'	'transport.misc'	transmembrane transport; LOCATED IN: plasma membrane
Medtr4g117600	'34.99'	'transport.misc'	membrane; EXPRESSED IN: 22 plant structures; EXPRESSED DURING: 13 growth stages; CONTAINS InterPro DOMAIN/s: AWPM-19-like (InterPro:IPR008390); BEST Arabidopsis thaliana protein match is: AWPM-19-like family protein (TAIR:AT5G46530.1); Has 1807 Blast hits to 1807 proteins in 277 species: Archae - 0; Bacteria - 0; Metazoa - 736; Fungi - 347; Plants - 385; Viruses - 0; Other Eukaryotes - 339 (sourc…
Medtr5g032750	'34.99'	'transport.misc'	drug transmembrane transporter activity
Medtr5g054780	'34.99'	'transport.misc'	T
Medtr6g047640	'34.99'	'transport.misc'	drug transmembrane transporter activity
Medtr6g081410	'34.99'	'transport.misc'	drug transmembrane transporter activity
Medtr8g059125	'34.99'	'transport.misc'	T
Medtr0121s0060	'35.1'	'not assigned.no ontology'	chloroplast stroma
Medtr0160s0040	'35.1'	'not assigned.no ontology'	trans-membrane plant (InterPro:IPR006702)
Medtr0415s0020	'35.1'	'not assigned.no ontology'	T
Medtr1g008160	'35.1'	'not assigned.no ontology'	WSD1
Medtr1g018320	'35.1'	'not assigned.no ontology'	T
Medtr1g062980	'35.1'	'not assigned.no ontology'	T
Medtr1g072490	'35.1'	'not assigned.no ontology'	T
Medtr1g072500	'35.1'	'not assigned.no ontology'	T
Medtr1g075260	'35.1'	'not assigned.no ontology'	flower
Medtr1g089280	'35.1'	'not assigned.no ontology'	type 2 (InterPro:IPR013210)
Medtr1g093630	'35.1'	'not assigned.no ontology'	vacuole; EXPRESSED IN: 22 plant structures; EXPRESSED DURING: 13 growth stages; CONTAINS InterPro DOMAIN/s: Malectin/receptor-like protein kinase (InterPro:IPR021720)
Medtr1g112660	'35.1'	'not assigned.no ontology'	arabidopsis & (at4g35110 : 129.0) Arabidopsis phospholipase-like protein (PEARLI 4) family; FUNCTIONS IN: molecular_function unknown; INVOLVED IN: response to karrikin; LOCATED IN: cellular_component unknown; EXPRESSED IN: 15 plant structures; EXPRESSED DURING: 10 growth stages; CONTAINS InterPro DOMAIN/s: Phospholipase-like
Medtr2g013950	'35.1'	'not assigned.no ontology'	T
Medtr2g019860	'35.1'	'not assigned.no ontology'	beta-propeller (InterPro:IPR011043)
Medtr2g022250	'35.1'	'not assigned.no ontology'	T
Medtr2g022990	'35.1'	'not assigned.no ontology'	T
Medtr2g079630	'35.1'	'not assigned.no ontology'	core (InterPro:IPR000644); BEST Arabidopsis thaliana protein match is: CBS domain-containing protein (TAIR:AT5G53750.1); Has 145 Blast hits to 145 proteins in 17 species: Archae - 0; Bacteria - 0; Metazoa - 1; Fungi - 0; Plants - 144; Viruses - 0; Other Eukaryotes - 0 (source: NCBI BLink). & (gnl|cdd|36975 : 95.1) no description available & (reliability: 532.0) & (original description: no origina…
Medtr2g084540	'35.1'	'not assigned.no ontology'	GPI19/PIG-P subunit; FUNCTIONS IN: molecular_function unknown; INVOLVED IN: biological_process unknown; LOCATED IN: chloroplast; CONTAINS InterPro DOMAIN/s: PIG-P (InterPro:IPR013717)
Medtr2g088060	'35.1'	'not assigned.no ontology'	plasma membrane; EXPRESSED IN: 26 plant structures; EXPRESSED DURING: 13 growth stages; CONTAINS InterPro DOMAIN/s: B-cell receptor-associated 31-like (InterPro:IPR008417); BEST Arabidopsis thaliana protein match is: B-cell receptor-associated protein 31-like (TAIR:AT1G11905.1); Has 30201 Blast hits to 17322 proteins in 780 species: Archae - 12; Bacteria - 1396; Metazoa - 17338; Fungi - 3422; Pla…
Medtr2g097520	'35.1'	'not assigned.no ontology'	HAD-superfamily hydrolase
Medtr2g436530	'35.1'	'not assigned.no ontology'	nucleotide binding; LOCATED IN: cellular_component unknown; CONTAINS InterPro DOMAIN/s: WD40 repeat 2 (InterPro:IPR019782)
Medtr2g460800	'35.1'	'not assigned.no ontology'	chloroplast; CONTAINS InterPro DOMAIN/s: Reticulon (InterPro:IPR003388); BEST Arabidopsis thaliana protein match is: Reticulon family protein (TAIR:AT2G20590.1); Has 1128 Blast hits to 1113 proteins in 146 species: Archae - 0; Bacteria - 2; Metazoa - 759; Fungi - 49; Plants - 88; Viruses - 4; Other Eukaryotes - 226 (source: NCBI BLink). & (reliability: 458.0) & (original description: no original …
Medtr3g045180	'35.1'	'not assigned.no ontology'	T
Medtr3g064900	'35.1'	'not assigned.no ontology'	binding
Medtr3g071610	'35.1'	'not assigned.no ontology'	acting on glycosyl bonds
Medtr3g087490	'35.1'	'not assigned.no ontology'	PLAT/LH2 family protein; FUNCTIONS IN: molecular_function unknown; INVOLVED IN: biological_process unknown; LOCATED IN: thylakoid
Medtr3g087510	'35.1'	'not assigned.no ontology'	PLAT/LH2 family protein; FUNCTIONS IN: molecular_function unknown; INVOLVED IN: biological_process unknown; LOCATED IN: thylakoid
Medtr3g110172	'35.1'	'not assigned.no ontology'	root
Medtr3g115450	'35.1'	'not assigned.no ontology'	Patched (InterPro:IPR003392)
Medtr3g116380	'35.1'	'not assigned.no ontology'	a BURP domain protein targeted to the protein storage vacuoles. Overexpression of USPL1 affects seed development
Medtr3g464530	'35.1'	'not assigned.no ontology'	acting on paired donors
Medtr4g009030	'35.1'	'not assigned.no ontology'	T
Medtr4g010000	'35.1'	'not assigned.no ontology'	catalytic activity; LOCATED IN: chloroplast; EXPRESSED IN: 21 plant structures; EXPRESSED DURING: 13 growth stages; CONTAINS InterPro DOMAIN/s: Epoxide hydrolase-like (InterPro:IPR000639)
Medtr4g046677	'35.1'	'not assigned.no ontology'	T
Medtr4g048040	'35.1'	'not assigned.no ontology'	T
Medtr4g057960	'35.1'	'not assigned.no ontology'	T
Medtr4g085570	'35.1'	'not assigned.no ontology'	plant & (at2g23360 : 226.0) Plant protein of unknown function (DUF869); CONTAINS InterPro DOMAIN/s: Protein of unknown function DUF869
Medtr4g086320	'35.1'	'not assigned.no ontology'	T
Medtr4g094730	'35.1'	'not assigned.no ontology'	plasma membrane
Medtr4g100950	'35.1'	'not assigned.no ontology'	transferring hexosyl groups
Medtr4g109300	'35.1'	'not assigned.no ontology'	threonine- and tyrosine-phosphorylation sites
Medtr4g114930	'35.1'	'not assigned.no ontology'	WD40/YVTN repeat-like-containing domain (InterPro:IPR015943); BEST Arabidopsis thaliana protein match is: Transducin family protein / WD-40 repeat family protein (TAIR:AT2G26610.1). & (gnl|cdd|37123 : 585.0) no description available & (reliability: 3192.0) & (original description: no original description)'
Medtr4g117140	'35.1'	'not assigned.no ontology'	T
Medtr4g129180	'35.1'	'not assigned.no ontology'	BNR repeat (InterPro:IPR002860); Has 762 Blast hits to 754 proteins in 300 species: Archae - 6; Bacteria - 615; Metazoa - 0; Fungi - 22; Plants - 42; Viruses - 0; Other Eukaryotes - 77 (source: NCBI BLink). & (gnl|cdd|34308 : 116.0) no description available & (reliability: 992.0) & (original description: no original description)'
Medtr4g129200	'35.1'	'not assigned.no ontology'	BNR repeat (InterPro:IPR002860); Has 762 Blast hits to 754 proteins in 300 species: Archae - 6; Bacteria - 615; Metazoa - 0; Fungi - 22; Plants - 42; Viruses - 0; Other Eukaryotes - 77 (source: NCBI BLink). & (gnl|cdd|34308 : 112.0) no description available & (reliability: 998.0) & (original description: no original description)'
Medtr5g007350	'35.1'	'not assigned.no ontology'	plant (InterPro:IPR008545); BEST Arabidopsis thaliana protein match is: Plant protein of unknown function (DUF827) (TAIR:AT5G16730.1). & (gnl|cdd|35383 : 91.1) no description available & (reliability: 650.0) & (original description: no original description)'
Medtr5g009130	'35.1'	'not assigned.no ontology'	group 2 (InterPro:IPR004864); BEST Arabidopsis thaliana protein match is: Glycine-rich protein family (TAIR:AT1G64450.1); Has 35333 Blast hits to 34131 proteins in 2444 species: Archae - 798; Bacteria - 22429; Metazoa - 974; Fungi - 991; Plants - 531; Viruses - 0; Other Eukaryotes - 9610 (source: NCBI BLink). & (reliability: 292.0) & (original description: no original description)'
Medtr5g016830	'35.1'	'not assigned.no ontology'	plant (InterPro:IPR008587); BEST Arabidopsis thaliana protein match is: Plant protein of unknown function (DUF869) (TAIR:AT1G19835.2); Has 38218 Blast hits to 24021 proteins in 1620 species: Archae - 547; Bacteria - 4231; Metazoa - 19834; Fungi - 3463; Plants - 2306; Viruses - 121; Other Eukaryotes - 7716 (source: NCBI BLink). & (gnl|cdd|72813 : 199.0) no description available & (ipr008587 : 159.…
Medtr5g017810	'35.1'	'not assigned.no ontology'	WD40 repeat-like-containing domain (InterPro:IPR011046)
Medtr5g018190	'35.1'	'not assigned.no ontology'	T
Medtr5g019430	'35.1'	'not assigned.no ontology'	peroxisome
Medtr5g025650	'35.1'	'not assigned.no ontology'	oxidoreductase activity
Medtr5g053610	'35.1'	'not assigned.no ontology'	vacuole; EXPRESSED IN: 22 plant structures; EXPRESSED DURING: 13 growth stages; CONTAINS InterPro DOMAIN/s: Malectin/receptor-like protein kinase (InterPro:IPR021720)
Medtr5g064035	'35.1'	'not assigned.no ontology'	T
Medtr5g081040	'35.1'	'not assigned.no ontology'	T
Medtr5g464770	'35.1'	'not assigned.no ontology'	methyltransferase
Medtr6g005220	'35.1'	'not assigned.no ontology'	WD40 repeat
Medtr6g038640	'35.1'	'not assigned.no ontology'	binding
Medtr6g038650	'35.1'	'not assigned.no ontology'	binding
Medtr6g045553	'35.1'	'not assigned.no ontology'	a putative acyl-transferase. Mutation in this locus results in altered trichome phenotype (trcichomes become tangled during leaf expansion). Additional phenotype includes altered cuticle layer.; PERMEABLE LEAVES3 (PEL3); FUNCTIONS IN: transferase activity
Medtr6g488050	'35.1'	'not assigned.no ontology'	root
Medtr6g488090	'35.1'	'not assigned.no ontology'	root
Medtr7g076520	'35.1'	'not assigned.no ontology'	N-terminal (InterPro:IPR004331)
Medtr7g088620	'35.1'	'not assigned.no ontology'	T
Medtr7g110610	'35.1'	'not assigned.no ontology'	transferring acyl groups other than amino-acyl groups
Medtr7g114960	'35.1'	'not assigned.no ontology'	transferring acyl groups other than amino-acyl groups
Medtr7g117750	'35.1'	'not assigned.no ontology'	T
Medtr7g118270	'35.1'	'not assigned.no ontology'	group 2 (InterPro:IPR004864); BEST Arabidopsis thaliana protein match is: NDR1/HIN1-like 1 (TAIR:AT3G11660.1); Has 938 Blast hits to 938 proteins in 28 species: Archae - 0; Bacteria - 0; Metazoa - 0; Fungi - 0; Plants - 938; Viruses - 0; Other Eukaryotes - 0 (source: NCBI BLink). & (gnl|cdd|70773 : 118.0) no description available & (reliability: 362.0) & (original description: no original descrip…
Medtr8g022280	'35.1'	'not assigned.no ontology'	T
Medtr8g028230	'35.1'	'not assigned.no ontology'	plasma membrane; EXPRESSED IN: 9 plant structures; EXPRESSED DURING: 6 growth stages; BEST Arabidopsis thaliana protein match is: intracellular protein transport protein USO1-related (TAIR:AT1G64180.1); Has 30201 Blast hits to 17322 proteins in 780 species: Archae - 12; Bacteria - 1396; Metazoa - 17338; Fungi - 3422; Plants - 5037; Viruses - 0; Other Eukaryotes - 2996 (source: NCBI BLink). & (rel…
Medtr8g070830	'35.1'	'not assigned.no ontology'	putative; LOCATED IN: chloroplast
Medtr8g072210	'35.1'	'not assigned.no ontology'	oxidoreductase activity
Medtr8g077150	'35.1'	'not assigned.no ontology'	N-terminal (InterPro:IPR001623); BEST Arabidopsis thaliana protein match is: Chaperone DnaJ-domain superfamily protein (TAIR:AT4G12770.2); Has 187564 Blast hits to 104912 proteins in 3501 species: Archae - 1251; Bacteria - 31029; Metazoa - 79517; Fungi - 15919; Plants - 9547; Viruses - 688; Other Eukaryotes - 49613 (source: NCBI BLink). & (gnl|cdd|35652 : 160.0) no description available & (reliab…
Medtr8g077610	'35.1'	'not assigned.no ontology'	putative (InterPro:IPR019410); BEST Arabidopsis thaliana protein match is: Putative methyltransferase family protein (TAIR:AT3G50850.1); Has 1807 Blast hits to 1807 proteins in 277 species: Archae - 0; Bacteria - 0; Metazoa - 736; Fungi - 347; Plants - 385; Viruses - 0; Other Eukaryotes - 339 (source: NCBI BLink). & (gnl|cdd|38004 : 175.0) no description available & (reliability: 520.0) & (origin…
Medtr8g078250	'35.1'	'not assigned.no ontology'	T
Medtr8g079472	'35.1'	'not assigned.no ontology'	N-terminal (InterPro:IPR001623); BEST Arabidopsis thaliana protein match is: J-domain protein required for chloroplast accumulation response 1 (TAIR:AT1G75100.1); Has 2071 Blast hits to 1585 proteins in 232 species: Archae - 0; Bacteria - 49; Metazoa - 766; Fungi - 302; Plants - 290; Viruses - 69; Other Eukaryotes - 595 (source: NCBI BLink). & (gnl|cdd|35652 : 119.0) no description available & (r…
Medtr8g081480	'35.1'	'not assigned.no ontology'	transferring acyl groups other than amino-acyl groups
Medtr8g088110	'35.1'	'not assigned.no ontology'	T
Medtr8g094740	'35.1'	'not assigned.no ontology'	amidase activity; INVOLVED IN: defense response to bacterium; LOCATED IN: endoplasmic reticulum
Medtr8g097350	'35.1'	'not assigned.no ontology'	T
Medtr8g104870	'35.1'	'not assigned.no ontology'	T
Medtr1g008980	'35.1.1'	'not assigned.no ontology.ABC1 family protein'	Beta-lactamase-type transpeptidase fold (InterPro:IPR012338)
Medtr1g100230	'35.1.12'	'not assigned.no ontology.pumilio/Puf RNA-binding domain-containing protein'	binding; LOCATED IN: nucleus
Medtr3g087800	'35.1.19'	'not assigned.no ontology.C2 domain-containing protein'	Armadillo-like helical (InterPro:IPR011989)
Medtr4g123110	'35.1.19'	'not assigned.no ontology.C2 domain-containing protein'	Protein of unknown function DUF946 (InterPro:IPR009291)
Medtr5g013780	'35.1.19'	'not assigned.no ontology.C2 domain-containing protein'	Protein of unknown function DUF946 (InterPro:IPR009291)
Medtr5g079880	'35.1.19'	'not assigned.no ontology.C2 domain-containing protein'	C2 calcium/lipid-binding domain
Medtr6g028050	'35.1.19'	'not assigned.no ontology.C2 domain-containing protein'	plasma membrane; EXPRESSED IN: 18 plant structures; EXPRESSED DURING: 7 growth stages; CONTAINS InterPro DOMAIN/s: C2 membrane targeting protein (InterPro:IPR018029)
Medtr8g091470	'35.1.19'	'not assigned.no ontology.C2 domain-containing protein'	Armadillo-like helical (InterPro:IPR011989)
Medtr1g013800	'35.1.20'	'not assigned.no ontology.formin homology 2 domain-containing protein'	actin cytoskeleton organization; CONTAINS InterPro DOMAIN/s: Actin-binding FH2/DRF autoregulatory (InterPro:IPR003104)
Medtr7g080920	'35.1.20'	'not assigned.no ontology.formin homology 2 domain-containing protein'	protein binding
Medtr8g027995	'35.1.20'	'not assigned.no ontology.formin homology 2 domain-containing protein'	protein binding
Medtr4g114960	'35.1.21'	'not assigned.no ontology.epsin N-terminal homology (ENTH) domain-containing protein'	clathrin binding
Medtr8g064810	'35.1.26'	'not assigned.no ontology.DC1 domain containing protein'	antioxidant activity; INVOLVED IN: response to cadmium ion
Medtr8g064840	'35.1.26'	'not assigned.no ontology.DC1 domain containing protein'	antioxidant activity; INVOLVED IN: response to cadmium ion
Medtr1g014420	'35.1.3'	'not assigned.no ontology.armadillo/beta-catenin repeat family protein'	Armadillo (InterPro:IPR000225)
Medtr4g105110	'35.1.3'	'not assigned.no ontology.armadillo/beta-catenin repeat family protein'	anthers and ovules.; armadillo repeat only 4 (ARO4); FUNCTIONS IN: binding; INVOLVED IN: biological_process unknown; LOCATED IN: cellular_component unknown; EXPRESSED IN: 25 plant structures; EXPRESSED DURING: 13 growth stages; CONTAINS InterPro DOMAIN/s: Armadillo-like helical (InterPro:IPR011989)
Medtr7g066730	'35.1.40'	'not assigned.no ontology.glycine rich proteins'	T
Medtr2g099520	'35.1.41'	'not assigned.no ontology.hydroxyproline rich proteins'	nucleus
Medtr8g067590	'35.1.41'	'not assigned.no ontology.hydroxyproline rich proteins'	T
Medtr2g048360	'35.1.42'	'not assigned.no ontology.proline rich family'	F mature embryo stage
Medtr5g022530	'35.1.42'	'not assigned.no ontology.proline rich family'	small GTPase mediated signal transduction; LOCATED IN: intracellular; EXPRESSED IN: 17 plant structures; EXPRESSED DURING: 11 growth stages; CONTAINS InterPro DOMAIN/s: Protein of unknown function DUF630 (InterPro:IPR006868)
Medtr5g066730	'35.1.9'	'not assigned.no ontology.BTB/POZ domain-containing protein'	C-terminal (InterPro:IPR000421)
Medtr0002s0040	'35.2'	'not assigned.unknown'	T
Medtr0002s0250	'35.2'	'not assigned.unknown'	T
Medtr0002s0270	'35.2'	'not assigned.unknown'	T
Medtr0002s0900	'35.2'	'not assigned.unknown'	T
Medtr0002s1060	'35.2'	'not assigned.unknown'	T
Medtr0009s0100	'35.2'	'not assigned.unknown'	T
Medtr0024s0010	'35.2'	'not assigned.unknown'	T
Medtr0050s0010	'35.2'	'not assigned.unknown'	plant (InterPro:IPR010341); BEST Arabidopsis thaliana protein match is: Plant protein of unknown function (DUF936) (TAIR:AT1G08760.1); Has 314 Blast hits to 224 proteins in 22 species: Archae - 0; Bacteria - 0; Metazoa - 17; Fungi - 0; Plants - 291; Viruses - 0; Other Eukaryotes - 6 (source: NCBI BLink). & (ipr010341 : 181.92442) Protein of unknown function DUF936
Medtr0052s0140	'35.2'	'not assigned.unknown'	T
Medtr0083s0110	'35.2'	'not assigned.unknown'	T
Medtr0110s0010	'35.2'	'not assigned.unknown'	T
Medtr0242s0030	'35.2'	'not assigned.unknown'	T
Medtr0263s0020	'35.2'	'not assigned.unknown'	T
Medtr0276s0040	'35.2'	'not assigned.unknown'	T
Medtr0286s0050	'35.2'	'not assigned.unknown'	T
Medtr0415s0010	'35.2'	'not assigned.unknown'	T
Medtr0470s0010	'35.2'	'not assigned.unknown'	T
Medtr0474s0020	'35.2'	'not assigned.unknown'	T
Medtr0635s0010	'35.2'	'not assigned.unknown'	T
Medtr1g007630	'35.2'	'not assigned.unknown'	T
Medtr1g008675	'35.2'	'not assigned.unknown'	T
Medtr1g010270	'35.2'	'not assigned.unknown'	and reduced shoot and root length when growing on Mo-limited medium.; molybdate transporter 1 (MOT1); FUNCTIONS IN: molybdate ion transmembrane transporter activity
Medtr1g012950	'35.2'	'not assigned.unknown'	T
Medtr1g015650	'35.2'	'not assigned.unknown'	T
Medtr1g018440	'35.2'	'not assigned.unknown'	a member of a largely uncharacterized protein family unique to the plant kingdom. The sco3-1 mutation alters chloroplast morphology and development
Medtr1g018750	'35.2'	'not assigned.unknown'	thioester and amide bonds in a range of substrates including complex polysaccharides
Medtr1g018810	'35.2'	'not assigned.unknown'	T
Medtr1g018830	'35.2'	'not assigned.unknown'	T
Medtr1g018990	'35.2'	'not assigned.unknown'	T
Medtr1g019660	'35.2'	'not assigned.unknown'	T
Medtr1g019800	'35.2'	'not assigned.unknown'	T
Medtr1g022015	'35.2'	'not assigned.unknown'	eukaryotic (InterPro:IPR008580); BEST Arabidopsis thaliana protein match is: PPPDE putative thiol peptidase family protein (TAIR:AT5G25170.1); Has 35333 Blast hits to 34131 proteins in 2444 species: Archae - 798; Bacteria - 22429; Metazoa - 974; Fungi - 991; Plants - 531; Viruses - 0; Other Eukaryotes - 9610 (source: NCBI BLink). & (gnl|cdd|35545 : 225.0) no description available & (gnl|cdd|69428…
Medtr1g022500	'35.2'	'not assigned.unknown'	T
Medtr1g022950	'35.2'	'not assigned.unknown'	LAG1 and CLN8 (TLC) lipid-sensing domain containing protein; FUNCTIONS IN: molecular_function unknown; INVOLVED IN: biological_process unknown; LOCATED IN: integral to membrane; CONTAINS InterPro DOMAIN/s: TRAM/LAG1/CLN8 homology domain (InterPro:IPR006634); BEST Arabidopsis thaliana protein match is: TRAM
Medtr1g024095	'35.2'	'not assigned.unknown'	plant (InterPro:IPR008587); BEST Arabidopsis thaliana protein match is: Plant protein of unknown function (DUF869) (TAIR:AT1G47900.2). & (ipr008587 : 576.7251) Protein of unknown function DUF869
Medtr1g025250	'35.2'	'not assigned.unknown'	T
Medtr1g025340	'35.2'	'not assigned.unknown'	Protein of unknown function DUF3475 (InterPro:IPR021864); BEST Arabidopsis thaliana protein match is: Protein of unknown function (DUF668) (TAIR:AT1G34320.1); Has 465 Blast hits to 399 proteins in 71 species: Archae - 2; Bacteria - 14; Metazoa - 66; Fungi - 16; Plants - 336; Viruses - 0; Other Eukaryotes - 31 (source: NCBI BLink). & (gnl|cdd|68572 : 102.0) no description available & (reliability:…
Medtr1g025490	'35.2'	'not assigned.unknown'	T
Medtr1g026700	'35.2'	'not assigned.unknown'	T
Medtr1g029800	'35.2'	'not assigned.unknown'	T
Medtr1g033080	'35.2'	'not assigned.unknown'	T
Medtr1g033130	'35.2'	'not assigned.unknown'	T
Medtr1g034270	'35.2'	'not assigned.unknown'	T
Medtr1g034490	'35.2'	'not assigned.unknown'	eukaryotic (InterPro:IPR008580); BEST Arabidopsis thaliana protein match is: PPPDE putative thiol peptidase family protein (TAIR:AT5G25170.1); Has 35333 Blast hits to 34131 proteins in 2444 species: Archae - 798; Bacteria - 22429; Metazoa - 974; Fungi - 991; Plants - 531; Viruses - 0; Other Eukaryotes - 9610 (source: NCBI BLink). & (gnl|cdd|35545 : 233.0) no description available & (gnl|cdd|69428…
Medtr1g038260	'35.2'	'not assigned.unknown'	T
Medtr1g039020	'35.2'	'not assigned.unknown'	T
Medtr1g041275	'35.2'	'not assigned.unknown'	T
Medtr1g041300	'35.2'	'not assigned.unknown'	T
Medtr1g041395	'35.2'	'not assigned.unknown'	plant (InterPro:IPR013666)
Medtr1g048470	'35.2'	'not assigned.unknown'	T
Medtr1g050385	'35.2'	'not assigned.unknown'	T
Medtr1g050445	'35.2'	'not assigned.unknown'	T
Medtr1g050448	'35.2'	'not assigned.unknown'	two of which (TBR/AT5G06700 and TBL3/AT5G01360) have been shown to be involved in the synthesis and deposition of secondary wall cellulose
Medtr1g051625	'35.2'	'not assigned.unknown'	T
Medtr1g052120	'35.2'	'not assigned.unknown'	T
Medtr1g052125	'35.2'	'not assigned.unknown'	T
Medtr1g054150	'35.2'	'not assigned.unknown'	T
Medtr1g054175	'35.2'	'not assigned.unknown'	T
Medtr1g054670	'35.2'	'not assigned.unknown'	T
Medtr1g058120	'35.2'	'not assigned.unknown'	T
Medtr1g062200	'35.2'	'not assigned.unknown'	F-box and Leucine Rich Repeat domains containing protein (TAIR:AT1G22000.1); Has 84739 Blast hits to 38714 proteins in 2257 species: Archae - 1436; Bacteria - 11314; Metazoa - 40747; Fungi - 7706; Plants - 4675; Viruses - 308; Other Eukaryotes - 18553 (source: NCBI BLink). & (reliability: 181.8) & (original description: no original description)'
Medtr1g063260	'35.2'	'not assigned.unknown'	T
Medtr1g069300	'35.2'	'not assigned.unknown'	T
Medtr1g070495	'35.2'	'not assigned.unknown'	T
Medtr1g075170	'35.2'	'not assigned.unknown'	T
Medtr1g075180	'35.2'	'not assigned.unknown'	T
Medtr1g075310	'35.2'	'not assigned.unknown'	inflorescence meristem
Medtr1g075490	'35.2'	'not assigned.unknown'	T
Medtr1g076500	'35.2'	'not assigned.unknown'	plant (InterPro:IPR006502); BEST Arabidopsis thaliana protein match is: Protein of unknown function (DUF506) (TAIR:AT4G14620.1); Has 35333 Blast hits to 34131 proteins in 2444 species: Archae - 798; Bacteria - 22429; Metazoa - 974; Fungi - 991; Plants - 531; Viruses - 0; Other Eukaryotes - 9610 (source: NCBI BLink). & (gnl|cdd|68298 : 220.0) no description available & (ipr006502 : 159.92819) Prot…
Medtr1g077460	'35.2'	'not assigned.unknown'	T
Medtr1g077580	'35.2'	'not assigned.unknown'	T
Medtr1g078290	'35.2'	'not assigned.unknown'	T
Medtr1g080320	'35.2'	'not assigned.unknown'	T
Medtr1g082370	'35.2'	'not assigned.unknown'	T
Medtr1g084200	'35.2'	'not assigned.unknown'	a protein with a conserved domain of unknown function (DUF538). The trichomes of the SVB mutants are smaller and exhibit branches of variable length and number.; SMALLER WITH VARIABLE BRANCHES (SVB); CONTAINS InterPro DOMAIN/s: Protein of unknown function DUF538 (InterPro:IPR007493); BEST Arabidopsis thaliana protein match is: Protein of unknown function
Medtr1g085240	'35.2'	'not assigned.unknown'	T
Medtr1g086153	'35.2'	'not assigned.unknown'	T
Medtr1g086170	'35.2'	'not assigned.unknown'	T
Medtr1g086430	'35.2'	'not assigned.unknown'	T
Medtr1g086450	'35.2'	'not assigned.unknown'	T
Medtr1g088230	'35.2'	'not assigned.unknown'	T
Medtr1g094820	'35.2'	'not assigned.unknown'	T
Medtr1g095085	'35.2'	'not assigned.unknown'	T
Medtr1g099550	'35.2'	'not assigned.unknown'	T
Medtr1g099825	'35.2'	'not assigned.unknown'	T
Medtr1g100623	'35.2'	'not assigned.unknown'	T
Medtr1g101015	'35.2'	'not assigned.unknown'	T
Medtr1g102240	'35.2'	'not assigned.unknown'	T
Medtr1g103550	'35.2'	'not assigned.unknown'	plant (InterPro:IPR012876); BEST Arabidopsis thaliana protein match is: Protein of unknown function (DUF1677) (TAIR:AT4G14819.1); Has 245 Blast hits to 245 proteins in 14 species: Archae - 0; Bacteria - 0; Metazoa - 0; Fungi - 0; Plants - 245; Viruses - 0; Other Eukaryotes - 0 (source: NCBI BLink). & (reliability: 234.0) & (original description: no original description)'
Medtr1g104520	'35.2'	'not assigned.unknown'	T
Medtr1g105305	'35.2'	'not assigned.unknown'	anchored to membrane; EXPRESSED IN: 22 plant structures; EXPRESSED DURING: 13 growth stages; BEST Arabidopsis thaliana protein match is: Glycoprotein membrane precursor GPI-anchored (TAIR:AT5G19250.1); Has 86 Blast hits to 85 proteins in 15 species: Archae - 0; Bacteria - 2; Metazoa - 0; Fungi - 0; Plants - 84; Viruses - 0; Other Eukaryotes - 0 (source: NCBI BLink). & (reliability: 422.0) & (orig…
Medtr1g105360	'35.2'	'not assigned.unknown'	T
[truncated: 517 more rows]

## Sheet: 0 profile age
IDENTIFIER	BINCODE	NAME Mapman annotation	TYPE
Medtr4g051370	'1.1.1.2'	'PS.lightreaction.photosystem II.PSII polypeptide subunits'	subunit of the photosystem II reaction center.; photosystem II reaction center protein B (PSBB); FUNCTIONS IN: chlorophyll binding; INVOLVED IN: photosynthesis
Medtr2g100210	'1.1.2.2'	'PS.lightreaction.photosystem I.PSI polypeptide subunits'	light harvesting in photosystem II
Medtr3g035600	'1.1.2.2'	'PS.lightreaction.photosystem I.PSI polypeptide subunits'	light harvesting in photosystem II
Medtr4g050960	'1.1.2.2'	'PS.lightreaction.photosystem I.PSI polypeptide subunits'	4 sulfur cluster binding
Medtr1g492700	'10.2'	'cell wall.cellulose synthesis'	family 2 (InterPro:IPR001173); BEST Arabidopsis thaliana protein match is: cellulose synthase-like A02 (TAIR:AT5G22740.1); Has 1807 Blast hits to 1807 proteins in 277 species: Archae - 0; Bacteria - 0; Metazoa - 736; Fungi - 347; Plants - 385; Viruses - 0; Other Eukaryotes - 339 (source: NCBI BLink). & (gnl|cdd|31408 : 130.0) no description available & (reliability: 1608.0) & (original descriptio…
Medtr4g055520	'10.2'	'cell wall.cellulose synthesis'	family 2 (InterPro:IPR001173); BEST Arabidopsis thaliana protein match is: Nucleotide-diphospho-sugar transferases superfamily protein (TAIR:AT5G03760.1); Has 5133 Blast hits to 5129 proteins in 1484 species: Archae - 200; Bacteria - 4017; Metazoa - 35; Fungi - 91; Plants - 482; Viruses - 11; Other Eukaryotes - 297 (source: NCBI BLink). & (gnl|cdd|31408 : 124.0) no description available & (reliab…
Medtr8g063270	'10.2'	'cell wall.cellulose synthesis'	plant-type cell wall biogenesis
Medtr1g073740	'10.2.1'	'cell wall.cellulose synthesis.cellulose synthase'	transferase activity
Medtr1g098550	'10.2.1'	'cell wall.cellulose synthesis.cellulose synthase'	related to CESA6.; cellulose synthase A9 (CESA9); FUNCTIONS IN: cellulose synthase activity
Medtr2g016630	'10.2.1'	'cell wall.cellulose synthesis.cellulose synthase'	reduced cellulose content
Medtr4g130510	'10.2.1'	'cell wall.cellulose synthesis.cellulose synthase'	plant-type cell wall biogenesis
Medtr7g015950	'10.2.2'	'cell wall.cellulose synthesis.COBRA'	multidimensional cell growth
Medtr7g015960	'10.2.2'	'cell wall.cellulose synthesis.COBRA'	similar to phytochelatin synthetase. Involved in secondary cell wall biosynthesis. Mutants make smaller plants with reduced levels of cellulose and cell wall sugars.; IRREGULAR XYLEM 6 (IRX6); INVOLVED IN: secondary cell wall biogenesis; LOCATED IN: plasma membrane
Medtr4g107360	'10.3'	'cell wall.hemicellulose synthesis'	transferring hexosyl groups
Medtr1g019540	'10.3.2'	'cell wall.hemicellulose synthesis.glucuronoxylan'	transferring glycosyl groups; INVOLVED IN: biosynthetic process; LOCATED IN: endomembrane system; EXPRESSED IN: inflorescence meristem
Medtr5g019220	'10.3.2'	'cell wall.hemicellulose synthesis.glucuronoxylan'	transferring hexosyl groups
Medtr2g093980	'10.5.1.1'	'cell wall.cell wall proteins.AGPs.AGP'	T
Medtr4g059720	'10.5.1.1'	'cell wall.cell wall proteins.AGPs.AGP'	anchored to membrane; EXPRESSED IN: 22 plant structures; EXPRESSED DURING: 13 growth stages; CONTAINS InterPro DOMAIN/s: FAS1 domain (InterPro:IPR000782); BEST Arabidopsis thaliana protein match is: FASCICLIN-like arabinogalactan-protein 11 (TAIR:AT5G03170.1); Has 1807 Blast hits to 1807 proteins in 277 species: Archae - 0; Bacteria - 0; Metazoa - 736; Fungi - 347; Plants - 385; Viruses - 0; Othe…
Medtr4g059780	'10.5.1.1'	'cell wall.cell wall proteins.AGPs.AGP'	anchored to membrane; EXPRESSED IN: 22 plant structures; EXPRESSED DURING: 13 growth stages; CONTAINS InterPro DOMAIN/s: FAS1 domain (InterPro:IPR000782); BEST Arabidopsis thaliana protein match is: FASCICLIN-like arabinogalactan-protein 11 (TAIR:AT5G03170.1); Has 1807 Blast hits to 1807 proteins in 277 species: Archae - 0; Bacteria - 0; Metazoa - 736; Fungi - 347; Plants - 385; Viruses - 0; Othe…
Medtr4g059790	'10.5.1.1'	'cell wall.cell wall proteins.AGPs.AGP'	anchored to membrane; EXPRESSED IN: 22 plant structures; EXPRESSED DURING: 13 growth stages; CONTAINS InterPro DOMAIN/s: FAS1 domain (InterPro:IPR000782); BEST Arabidopsis thaliana protein match is: FASCICLIN-like arabinogalactan-protein 11 (TAIR:AT5G03170.1); Has 1807 Blast hits to 1807 proteins in 277 species: Archae - 0; Bacteria - 0; Metazoa - 736; Fungi - 347; Plants - 385; Viruses - 0; Othe…
Medtr7g015970	'10.5.5'	'cell wall.cell wall proteins.RGP'	transferring hexosyl groups
Medtr3g113720	'10.6.1'	'cell wall.degradation.cellulases and beta -1	'(at1g19940 : 687.0) glycosyl hydrolase 9B5 (GH9B5); FUNCTIONS IN: hydrolase activity
Medtr1g087240	'10.6.2'	'cell wall.degradation.mannan-xylose-arabinose-fucose'	hydrolyzing O-glycosyl compounds; INVOLVED IN: carbohydrate metabolic process; LOCATED IN: plant-type cell wall; EXPRESSED IN: 23 plant structures; EXPRESSED DURING: 13 growth stages; CONTAINS InterPro DOMAIN/s: Glycoside hydrolase
Medtr1g102230	'10.6.2'	'cell wall.degradation.mannan-xylose-arabinose-fucose'	at least when heterologously expressed in <i>Pichia pastoris</i>. The enzyme has been postulated to act on fucosylated substrates other than xyloglucan oligosaccharides. was shown (<i>Pichia pastoris</i>) to hydrolyze fucose in 3- and 4-linkage
Medtr7g073320	'10.6.2'	'cell wall.degradation.mannan-xylose-arabinose-fucose'	hydrolase activity
Medtr7g073550	'10.6.2'	'cell wall.degradation.mannan-xylose-arabinose-fucose'	hydrolase activity
Medtr8g005270	'10.6.2'	'cell wall.degradation.mannan-xylose-arabinose-fucose'	hydrolase activity
Medtr8g006550	'10.6.2'	'cell wall.degradation.mannan-xylose-arabinose-fucose'	hydrolase activity
Medtr4g104320	'10.6.3'	'cell wall.degradation.pectate lyases and polygalacturonases'	AmbAllergen (InterPro:IPR018082)
Medtr0122s0020	'10.7'	'cell wall.modification'	2004. Plant Mol Bio). Involved in the formation of nematode-induced syncytia in roots of Arabidopsis thaliana.; expansin B3 (EXPB3); INVOLVED IN: response to cyclopentenone
Medtr2g090265	'10.7'	'cell wall.modification'	2004. Plant Mol Bio). Involved in the formation of nematode-induced syncytia in roots of Arabidopsis thaliana.; expansin B3 (EXPB3); INVOLVED IN: response to cyclopentenone
Medtr2g090270	'10.7'	'cell wall.modification'	2004. Plant Mol Bio). Involved in the formation of nematode-induced syncytia in roots of Arabidopsis thaliana.; expansin B3 (EXPB3); INVOLVED IN: response to cyclopentenone
Medtr4g063975	'10.7'	'cell wall.modification'	2004. Plant Mol Bio). Involved in the formation of nematode-induced syncytia in roots of Arabidopsis thaliana.; expansin A4 (EXPA4); CONTAINS InterPro DOMAIN/s: Barwin-related endoglucanase (InterPro:IPR009009)
Medtr4g075790	'10.7'	'cell wall.modification'	2004. Plant Mol Bio); expansin-like A1 (EXLA1); INVOLVED IN: unidimensional cell growth
Medtr7g084770	'10.7'	'cell wall.modification'	endoxyloglucan transferase
Medtr2g088080	'10.8.1'	'cell wall.pectin*esterases.PME'	copper ion binding; INVOLVED IN: oxidation reduction; LOCATED IN: apoplast
Medtr3g010770	'10.8.1'	'cell wall.pectin*esterases.PME'	pectinesterase activity; INVOLVED IN: cell wall modification; LOCATED IN: endomembrane system
Medtr5g018290	'10.8.1'	'cell wall.pectin*esterases.PME'	copper ion binding; INVOLVED IN: response to karrikin; LOCATED IN: cell wall
Medtr7g112580	'10.8.1'	'cell wall.pectin*esterases.PME'	pectinesterase activity; INVOLVED IN: cell wall modification; LOCATED IN: endomembrane system
Medtr8g093460	'10.8.1'	'cell wall.pectin*esterases.PME'	pectinesterase activity; INVOLVED IN: cell wall modification; LOCATED IN: cell wall
Medtr3g073860	'11.1.1.1'	'lipid metabolism.FA synthesis and FA elongation.Acetyl CoA Carboxylation.homomeric Enzyme'	N-terminal (InterPro:IPR011762)
Medtr2g054940	'11.1.10'	'lipid metabolism.FA synthesis and FA elongation.beta ketoacyl CoA synthase'	a member of the 3-ketoacyl-CoA synthase family involved in the biosynthesis of VLCFA (very long chain fatty acids).; 3-ketoacyl-CoA synthase 11 (KCS11); FUNCTIONS IN: transferase activity
Medtr7g118170	'11.1.10'	'lipid metabolism.FA synthesis and FA elongation.beta ketoacyl CoA synthase'	acyltransferase activity; INVOLVED IN: in 7 processes; LOCATED IN: cytosolic ribosome
Medtr2g036780	'11.1.11'	'lipid metabolism.FA synthesis and FA elongation.fatty acid elongase'	transferring acyl groups other than amino-acyl groups
Medtr5g023730	'11.1.8'	'lipid metabolism.FA synthesis and FA elongation.acyl coa ligase'	conserved site (InterPro:IPR020845)
Medtr8g086050	'11.1.8'	'lipid metabolism.FA synthesis and FA elongation.acyl coa ligase'	ligase activity; INVOLVED IN: metabolic process
Medtr1g034360	'11.1.9'	'lipid metabolism.FA synthesis and FA elongation.long chain fatty acid CoA ligase'	conserved site (InterPro:IPR020845)
Medtr7g109830	'11.1.9'	'lipid metabolism.FA synthesis and FA elongation.long chain fatty acid CoA ligase'	involved in cuticular wax and cutin biosynthesis; LONG-CHAIN ACYL-COA SYNTHASE 1 (LACS1); FUNCTIONS IN: long-chain fatty acid-CoA ligase activity
Medtr7g068780	'11.2.3'	'lipid metabolism.FA desaturation.omega 3 desaturase'	chloroplast precursor (EC 1.14.19.-) - Glycine max (Soybean) & (at5g05580 : 624.0) Encodes a temperature sensitive plastidic fatty acid desaturase.; fatty acid desaturase 8 (FAD8); CONTAINS InterPro DOMAIN/s: Protein of unknown function DUF3474 (InterPro:IPR021863)
Medtr7g067380	'11.3'	'lipid metabolism.Phospholipid synthesis'	T
Medtr8g094940	'11.3.5'	'lipid metabolism.Phospholipid synthesis.diacylglycerol kinase'	phorbol ester/diacylglycerol binding (InterPro:IPR002219)
Medtr1g094185	'11.5.3'	'lipid metabolism.glyceral metabolism.FAD-dependent glycerol-3-phosphate dehydrogenase'	and in glycerol-3-phosphate shuttle which transports reducing power from cytosol to mitochondrion.; SUGAR-DEPENDENT 6 (SDP6); FUNCTIONS IN: glycerol-3-phosphate dehydrogenase activity; INVOLVED IN: glycerophosphate shuttle
Medtr7g014880	'11.6'	'lipid metabolism.lipid transfer proteins etc'	anchored to membrane; EXPRESSED IN: 21 plant structures; EXPRESSED DURING: 13 growth stages; CONTAINS InterPro DOMAIN/s: Bifunctional inhibitor/plant lipid transfer protein/seed storage (InterPro:IPR016140)
Medtr2g013070	'11.8.1'	'lipid metabolism.'exotics' (steroids	'(at4g04930 : 527.0) Encodes a sphingolipid delta4-desaturase
Medtr4g068110	'11.8.4'	'lipid metabolism.'exotics' (steroids	'(at2g43420 : 496.0) 3-beta hydroxysteroid dehydrogenase/isomerase family protein; FUNCTIONS IN: binding
Medtr1g019270	'11.9.2.1'	'lipid metabolism.lipid degradation.lipases.triacylglycerol lipase'	class 3 (InterPro:IPR002921); BEST Arabidopsis thaliana protein match is: alpha/beta-Hydrolases superfamily protein (TAIR:AT1G56630.1); Has 1515 Blast hits to 1509 proteins in 328 species: Archae - 0; Bacteria - 466; Metazoa - 48; Fungi - 299; Plants - 385; Viruses - 5; Other Eukaryotes - 312 (source: NCBI BLink). & (gnl|cdd|73213 : 135.0) no description available & (gnl|cdd|39769 : 130.0) no des…
Medtr2g100250	'11.9.3.1'	'lipid metabolism.lipid degradation.lysophospholipases.phospholipase D'	hence it is a member of the alpha class. Its amino acid sequence is quite different from other PLDs
Medtr3g107360	'11.9.3.1'	'lipid metabolism.lipid degradation.lysophospholipases.phospholipase D'	phosphatidylinositol-4
Medtr5g011050	'11.9.3.1'	'lipid metabolism.lipid degradation.lysophospholipases.phospholipase D'	protein binding
Medtr7g075910	'11.9.3.1'	'lipid metabolism.lipid degradation.lysophospholipases.phospholipase D'	protein binding
Medtr1g105020	'11.9.3.2'	'lipid metabolism.lipid degradation.lysophospholipases.carboxylesterase'	hypocotyl
Medtr3g012440	'11.9.3.2'	'lipid metabolism.lipid degradation.lysophospholipases.carboxylesterase'	petal differentiation and expansion stage; CONTAINS InterPro DOMAIN/s: Lipase
Medtr7g082510	'11.9.3.3'	'lipid metabolism.lipid degradation.lysophospholipases.glycerophosphodiester phosphodiesterase'	ATP binding site (InterPro:IPR017441)
Medtr7g015710	'11.9.3.5'	'lipid metabolism.lipid degradation.lysophospholipases.phosphoinositide phospholipase C'	phosphoric diester hydrolase activity; INVOLVED IN: intracellular signaling pathway
Medtr4g053880	'11.9.4.13'	'lipid metabolism.lipid degradation.beta-oxidation.acyl CoA reductase'	involved in cuticular wax biosynthesis. Lines carrying recessive mutations are deficient in primary alcohol and have glossy stem surfaces.; ECERIFERUM 4 (CER4); FUNCTIONS IN: oxidoreductase activity
Medtr5g012920	'11.9.4.2'	'lipid metabolism.lipid degradation.beta-oxidation.acyl CoA DH'	drought stress
Medtr6g087670	'11.9.4.9'	'lipid metabolism.lipid degradation.beta-oxidation.multifunctional'	similar to CuMFP with L-3-hydroxyacyl-CoA hydrolyase
Medtr8g091280	'13.1.1.2.1'	'amino acid metabolism.synthesis.central amino acid metabolism.aspartate.aspartate aminotransferase'	transferase activity
Medtr6g027920	'13.1.3.4'	'amino acid metabolism.synthesis.aspartate family.methionine'	involved in methionine regeneration via the activated methyl cycle (SAM cycle). The protein undergoes thiolation following treatment with the oxidant tert-butylhydroperoxide.; COBALAMIN-INDEPENDENT METHIONINE SYNTHASE (ATCIMS); FUNCTIONS IN: 5-methyltetrahydropteroyltriglutamate-homocysteine S-methyltransferase activity
Medtr7g086300	'13.1.3.4'	'amino acid metabolism.synthesis.aspartate family.methionine'	involved in methionine regeneration via the activated methyl cycle (SAM cycle). The protein undergoes thiolation following treatment with the oxidant tert-butylhydroperoxide.; COBALAMIN-INDEPENDENT METHIONINE SYNTHASE (ATCIMS); FUNCTIONS IN: 5-methyltetrahydropteroyltriglutamate-homocysteine S-methyltransferase activity
Medtr2g008430	'13.1.3.5.3'	'amino acid metabolism.synthesis.aspartate family.lysine.LL-diaminopimelic acid aminotransferase'	transferring nitrogenous groups
Medtr5g064500	'13.1.6.1.1'	'amino acid metabolism.synthesis.aromatic aa.chorismate.3-deoxy-D-arabino-heptulosonate 7-phosphate synthase'	chloroplast precursor (EC 2.5.1.54) (Phospho-2-keto-3-deoxyheptonate aldolase 1) (DAHP synthetase 1) (3-deoxy-D-arabino-heptulosonate 7-phosphate synthase 1) - Nicotiana tabacum (Common tob & (at1g22410 : 855.0) Class-II DAHP synthetase family protein; FUNCTIONS IN: 3-deoxy-7-phosphoheptulonate synthase activity; INVOLVED IN: aromatic amino acid family biosynthetic process; LOCATED IN: membrane; …
Medtr2g084875	'13.1.6.3.1'	'amino acid metabolism.synthesis.aromatic aa.phenylalanine.arogenate dehydratase / prephenate dehydratase'	it is 98 times more active with arogenate than prephenate in enzymatic assays.; arogenate dehydratase 6 (ADT6); FUNCTIONS IN: arogenate dehydratase activity
Medtr4g055310	'13.1.6.3.1'	'amino acid metabolism.synthesis.aromatic aa.phenylalanine.arogenate dehydratase / prephenate dehydratase'	Prephenate dehydratase
Medtr3g071980	'13.1.6.4.1'	'amino acid metabolism.synthesis.aromatic aa.tyrosine.arogenate dehydrogenase \& prephenate dehydrogenase'	prephenate dehydrogenase (NADP+) activity
Medtr4g023390	'13.1.6.5'	'amino acid metabolism.synthesis.aromatic aa.tryptophan'	cell wall; EXPRESSED IN: 24 plant structures; EXPRESSED DURING: 13 growth stages; CONTAINS InterPro DOMAIN/s: C2 membrane targeting protein (InterPro:IPR018029)
Medtr7g076900	'13.1.6.5'	'amino acid metabolism.synthesis.aromatic aa.tryptophan'	C2 calcium/lipid-binding domain
Medtr6g007070	'13.2.1.2'	'amino acid metabolism.degradation.central amino acid metabolism.aspartate'	oxidoreductase activity
Medtr1g085140	'15.2'	'metal handling.binding	'(at3g62020 : 285.0) germin-like protein (GLP10); germin-like protein 10 (GLP10); FUNCTIONS IN: manganese ion binding
Medtr1g085500	'15.2'	'metal handling.binding	'(at3g62020 : 287.0) germin-like protein (GLP10); germin-like protein 10 (GLP10); FUNCTIONS IN: manganese ion binding
Medtr3g087770	'15.2'	'metal handling.binding	'(at4g39700 : 187.0) Heavy metal transport/detoxification superfamily protein ; FUNCTIONS IN: metal ion binding; INVOLVED IN: metal ion transport; LOCATED IN: cellular_component unknown; CONTAINS InterPro DOMAIN/s: Heavy metal transport/detoxification protein (InterPro:IPR006121); BEST Arabidopsis thaliana protein match is: Heavy metal transport/detoxification superfamily protein (TAIR:AT1G22990.…
Medtr3g099030	'15.2'	'metal handling.binding	'(at5g50740 : 171.0) Heavy metal transport/detoxification superfamily protein ; FUNCTIONS IN: metal ion binding; INVOLVED IN: metal ion transport; LOCATED IN: cellular_component unknown; EXPRESSED IN: 20 plant structures; EXPRESSED DURING: 13 growth stages; CONTAINS InterPro DOMAIN/s: Heavy metal transport/detoxification protein (InterPro:IPR006121); BEST Arabidopsis thaliana protein match is: fa…
Medtr8g018747	'15.2'	'metal handling.binding	'(at5g24580 : 104.0) Heavy metal transport/detoxification superfamily protein ; FUNCTIONS IN: copper ion binding
Medtr3g105550	'16.1'	'secondary metabolism.isoprenoids'	encodes KCS10
Medtr4g005190	'16.1'	'secondary metabolism.isoprenoids'	conserved site (InterPro:IPR002365)
Medtr4g092010	'16.1.5'	'secondary metabolism.isoprenoids.terpenoids'	metal-binding domain (InterPro:IPR005630)
Medtr3g462760	'16.10'	'secondary metabolism.simple phenols'	a member of laccase family (17 members in Arabidopsis). Might be involved in cell wall biosynthesis. Mutants have a mild irregular xylem phenotype.; IRREGULAR XYLEM 12 (IRX12); FUNCTIONS IN: laccase activity; INVOLVED IN: secondary cell wall biogenesis; LOCATED IN: endomembrane system
Medtr7g062310	'16.10'	'secondary metabolism.simple phenols'	a member of laccase family of genes (17 members in Arabidopsis).; laccase 17 (LAC17); FUNCTIONS IN: laccase activity; INVOLVED IN: oxidation reduction
Medtr3g102010	'16.2'	'secondary metabolism.phenylpropanoids'	transferring acyl groups other than amino-acyl groups
Medtr3g465950	'16.2'	'secondary metabolism.phenylpropanoids'	transferring acyl groups other than amino-acyl groups
Medtr8g071130	'16.2'	'secondary metabolism.phenylpropanoids'	NmrA-like (InterPro:IPR008030); BEST Arabidopsis thaliana protein match is: pinoresinol reductase 2 (TAIR:AT4G13660.1); Has 2085 Blast hits to 2085 proteins in 479 species: Archae - 27; Bacteria - 779; Metazoa - 2; Fungi - 496; Plants - 600; Viruses - 0; Other Eukaryotes - 181 (source: NCBI BLink). & (p52578|ifrh_soltu : 268.0) Isoflavone reductase homolog (EC 1.3.1.-) (CP100) - Solanum tuberosum…
Medtr1g064090	'16.2.1.1'	'secondary metabolism.phenylpropanoids.lignin biosynthesis.PAL'	a phenylalanine ammonia-lyase. Arabidopsis has four PALs: AT2G37040 (PAL1)
Medtr7g101395	'16.2.1.1'	'secondary metabolism.phenylpropanoids.lignin biosynthesis.PAL'	a phenylalanine ammonia-lyase. Arabidopsis has four PALs: AT2G37040 (PAL1)
Medtr7g101425	'16.2.1.1'	'secondary metabolism.phenylpropanoids.lignin biosynthesis.PAL'	a phenylalanine ammonia-lyase. Arabidopsis has four PALs: AT2G37040 (PAL1)
Medtr1g025950	'16.2.1.10'	'secondary metabolism.phenylpropanoids.lignin biosynthesis.CAD'	zinc ion binding; INVOLVED IN: oxidation reduction; LOCATED IN: apoplast; EXPRESSED IN: 25 plant structures; EXPRESSED DURING: 15 growth stages; CONTAINS InterPro DOMAIN/s: GroES-like (InterPro:IPR011032)
Medtr5g075450	'16.2.1.2'	'secondary metabolism.phenylpropanoids.lignin biosynthesis.C4H'	growth and development.; cinnamate-4-hydroxylase (C4H); FUNCTIONS IN: trans-cinnamate 4-monooxygenase activity; INVOLVED IN: in 9 processes; LOCATED IN: endoplasmic reticulum
Medtr4g005750	'16.2.1.3'	'secondary metabolism.phenylpropanoids.lignin biosynthesis.4CL'	which is involved in the last step of the general phenylpropanoid pathway. The catalytic efficiency was in the following (descending) order: p-coumaric acid
Medtr4g094925	'16.2.1.6'	'secondary metabolism.phenylpropanoids.lignin biosynthesis.CCoAOMT'	response to cadmium ion; LOCATED IN: cytosol; EXPRESSED IN: 24 plant structures; EXPRESSED DURING: 14 growth stages; CONTAINS InterPro DOMAIN/s: O-methyltransferase
Medtr6g091680	'16.2.1.6'	'secondary metabolism.phenylpropanoids.lignin biosynthesis.CCoAOMT'	inflorescence meristem
Medtr3g031650	'16.2.1.7'	'secondary metabolism.phenylpropanoids.lignin biosynthesis.CCR1'	binding
Medtr4g006940	'16.2.1.7'	'secondary metabolism.phenylpropanoids.lignin biosynthesis.CCR1'	NAD(P)-binding domain (InterPro:IPR016040); BEST Arabidopsis thaliana protein match is: cinnamoyl coa reductase 1 (TAIR:AT1G15950.1); Has 10779 Blast hits to 10766 proteins in 1817 species: Archae - 140; Bacteria - 4512; Metazoa - 410; Fungi - 946; Plants - 2512; Viruses - 14; Other Eukaryotes - 2245 (source: NCBI BLink). & (gnl|cdd|36715 : 361.0) no description available & (p51104|dfra_diaca : 1…
Medtr6g406250	'16.2.1.7'	'secondary metabolism.phenylpropanoids.lignin biosynthesis.CCR1'	binding
Medtr3g092900	'16.2.1.9'	'secondary metabolism.phenylpropanoids.lignin biosynthesis.COMT'	quercetin 3-O-methyltransferase activity
Medtr6g088665	'16.4.1'	'secondary metabolism.N misc.alkaloid-like'	acting on paired donors
Medtr2g025710	'16.7'	'secondary metabolism.wax'	T
Medtr4g129630	'16.7'	'secondary metabolism.wax'	binding
Medtr8g009560	'16.7'	'secondary metabolism.wax'	and they also lack the secondary alcohols and ketones. These suggested the CER1 protein is an aldehyde decarbonylase
Medtr8g009590	'16.7'	'secondary metabolism.wax'	and they also lack the secondary alcohols and ketones. These suggested the CER1 protein is an aldehyde decarbonylase
Medtr1g115820	'16.8.2'	'secondary metabolism.flavonoids.chalcones'	response to UV-B
Medtr3g083130	'16.8.2'	'secondary metabolism.flavonoids.chalcones'	Aldo/keto reductase subgroup (InterPro:IPR020471)
Medtr5g097900	'16.8.2'	'secondary metabolism.flavonoids.chalcones'	Aldo/keto reductase subgroup (InterPro:IPR020471)
Medtr5g097910	'16.8.2'	'secondary metabolism.flavonoids.chalcones'	Aldo/keto reductase subgroup (InterPro:IPR020471)
Medtr5g097940	'16.8.2'	'secondary metabolism.flavonoids.chalcones'	Aldo/keto reductase subgroup (InterPro:IPR020471)
Medtr1g097910	'16.8.2.1'	'secondary metabolism.flavonoids.chalcones.naringenin-chalcone synthase'	a key enzyme involved in the biosynthesis of flavonoids. Required for the accumulation of purple anthocyanins in leaves and stems. Also involved in the regulation of auxin transport and the modulation of root gravitropism.; TRANSPARENT TESTA 4 (TT4); FUNCTIONS IN: naringenin-chalcone synthase activity; INVOLVED IN: in 11 processes; LOCATED IN: plant-type vacuole membrane
Medtr1g097935	'16.8.2.1'	'secondary metabolism.flavonoids.chalcones.naringenin-chalcone synthase'	a key enzyme involved in the biosynthesis of flavonoids. Required for the accumulation of purple anthocyanins in leaves and stems. Also involved in the regulation of auxin transport and the modulation of root gravitropism.; TRANSPARENT TESTA 4 (TT4); FUNCTIONS IN: naringenin-chalcone synthase activity; INVOLVED IN: in 11 processes; LOCATED IN: plant-type vacuole membrane
Medtr1g098140	'16.8.2.1'	'secondary metabolism.flavonoids.chalcones.naringenin-chalcone synthase'	a key enzyme involved in the biosynthesis of flavonoids. Required for the accumulation of purple anthocyanins in leaves and stems. Also involved in the regulation of auxin transport and the modulation of root gravitropism.; TRANSPARENT TESTA 4 (TT4); FUNCTIONS IN: naringenin-chalcone synthase activity; INVOLVED IN: in 11 processes; LOCATED IN: plant-type vacuole membrane
Medtr5g007717	'16.8.2.1'	'secondary metabolism.flavonoids.chalcones.naringenin-chalcone synthase'	a key enzyme involved in the biosynthesis of flavonoids. Required for the accumulation of purple anthocyanins in leaves and stems. Also involved in the regulation of auxin transport and the modulation of root gravitropism.; TRANSPARENT TESTA 4 (TT4); FUNCTIONS IN: naringenin-chalcone synthase activity; INVOLVED IN: in 11 processes; LOCATED IN: plant-type vacuole membrane
Medtr5g007730	'16.8.2.1'	'secondary metabolism.flavonoids.chalcones.naringenin-chalcone synthase'	a key enzyme involved in the biosynthesis of flavonoids. Required for the accumulation of purple anthocyanins in leaves and stems. Also involved in the regulation of auxin transport and the modulation of root gravitropism.; TRANSPARENT TESTA 4 (TT4); FUNCTIONS IN: naringenin-chalcone synthase activity; INVOLVED IN: in 11 processes; LOCATED IN: plant-type vacuole membrane
Medtr7g016700	'16.8.2.1'	'secondary metabolism.flavonoids.chalcones.naringenin-chalcone synthase'	a key enzyme involved in the biosynthesis of flavonoids. Required for the accumulation of purple anthocyanins in leaves and stems. Also involved in the regulation of auxin transport and the modulation of root gravitropism.; TRANSPARENT TESTA 4 (TT4); FUNCTIONS IN: naringenin-chalcone synthase activity; INVOLVED IN: in 11 processes; LOCATED IN: plant-type vacuole membrane
Medtr7g016800	'16.8.2.1'	'secondary metabolism.flavonoids.chalcones.naringenin-chalcone synthase'	a key enzyme involved in the biosynthesis of flavonoids. Required for the accumulation of purple anthocyanins in leaves and stems. Also involved in the regulation of auxin transport and the modulation of root gravitropism.; TRANSPARENT TESTA 4 (TT4); FUNCTIONS IN: naringenin-chalcone synthase activity; INVOLVED IN: in 11 processes; LOCATED IN: plant-type vacuole membrane
Medtr7g016820	'16.8.2.1'	'secondary metabolism.flavonoids.chalcones.naringenin-chalcone synthase'	a key enzyme involved in the biosynthesis of flavonoids. Required for the accumulation of purple anthocyanins in leaves and stems. Also involved in the regulation of auxin transport and the modulation of root gravitropism.; TRANSPARENT TESTA 4 (TT4); FUNCTIONS IN: naringenin-chalcone synthase activity; INVOLVED IN: in 11 processes; LOCATED IN: plant-type vacuole membrane
Medtr0078s0010	'16.8.3'	'secondary metabolism.flavonoids.dihydroflavonols'	T
Medtr3g092890	'16.8.3'	'secondary metabolism.flavonoids.dihydroflavonols'	acting on paired donors
Medtr7g074710	'16.8.3.1'	'secondary metabolism.flavonoids.dihydroflavonols.dihydroflavonol 4-reductase'	oxidoreductase activity
Medtr7g056103	'16.8.3.3'	'secondary metabolism.flavonoids.dihydroflavonols.flavonoid 3''-monooxygenase'	family 93
Medtr8g020940	'16.8.3.3'	'secondary metabolism.flavonoids.dihydroflavonols.flavonoid 3''-monooxygenase'	Cytochrome P450
Medtr7g117405	'16.8.4'	'secondary metabolism.flavonoids.flavonols'	transferase activity
Medtr4g485630	'16.8.4.2'	'secondary metabolism.flavonoids.flavonols.flavonol 3-O-glycosyltransferase'	transferring hexosyl groups
Medtr3g007970	'16.8.5.1'	'secondary metabolism.flavonoids.isoflavones.isoflavone reductase'	putative
Medtr5g020740	'16.8.5.1'	'secondary metabolism.flavonoids.isoflavones.isoflavone reductase'	putative
Medtr5g020760	'16.8.5.1'	'secondary metabolism.flavonoids.isoflavones.isoflavone reductase'	acting on NADH or NADPH; INVOLVED IN: metabolic process; LOCATED IN: cellular_component unknown; EXPRESSED IN: sepal
Medtr5g020800	'16.8.5.1'	'secondary metabolism.flavonoids.isoflavones.isoflavone reductase'	which catalyzes NADPH-dependent reduction of 8-5' linked lignans such as dehydrodiconiferyl alcohol to give isodihydrodehydrodiconiferyl alcohol.; NmrA-like negative transcriptional regulator family protein; FUNCTIONS IN: phenylcoumaran benzylic ether reductase activity; INVOLVED IN: response to cadmium ion; LOCATED IN: cellular_component unknown; EXPRESSED IN: 25 plant structures; EXPRESSED DURI…
Medtr5g090580	'17.1.1'	'hormone metabolism.abscisic acid.synthesis-degradation'	a UDP glycosyltransferase (UGT). HYR1 glucosylates hypostatin
Medtr5g091800	'17.1.1'	'hormone metabolism.abscisic acid.synthesis-degradation'	T
Medtr5g025230	'17.1.1.1.10'	'hormone metabolism.abscisic acid.synthesis-degradation.synthesis.9-cis-epoxycarotenoid dioxygenase'	plastoglobule; EXPRESSED IN: 16 plant structures; EXPRESSED DURING: 9 growth stages; CONTAINS InterPro DOMAIN/s: Carotenoid oxygenase (InterPro:IPR004294); BEST Arabidopsis thaliana protein match is: nine-cis-epoxycarotenoid dioxygenase 5 (TAIR:AT1G30100.1); Has 2918 Blast hits to 2864 proteins in 491 species: Archae - 16; Bacteria - 796; Metazoa - 323; Fungi - 173; Plants - 887; Viruses - 0; Oth…
Medtr8g096670	'17.1.3'	'hormone metabolism.abscisic acid.induced-regulated-responsive-activated'	it may be involved in regulation of autophagy during development.; HVA22 homologue D (HVA22D); FUNCTIONS IN: molecular_function unknown; INVOLVED IN: in 7 processes; LOCATED IN: cellular_component unknown; EXPRESSED IN: 23 plant structures; EXPRESSED DURING: 15 growth stages; CONTAINS InterPro DOMAIN/s: TB2/DP1/HVA22 related protein (InterPro:IPR004345); BEST Arabidopsis thaliana protein match is…
Medtr2g100560	'17.2.1'	'hormone metabolism.auxin.synthesis-degradation'	stems
Medtr7g017100	'17.2.2'	'hormone metabolism.auxin.signal transduction'	binding
Medtr3g099480	'17.2.3'	'hormone metabolism.auxin.induced-regulated-responsive-activated'	T
Medtr4g023030	'17.2.3'	'hormone metabolism.auxin.induced-regulated-responsive-activated'	T
Medtr4g023050	'17.2.3'	'hormone metabolism.auxin.induced-regulated-responsive-activated'	T
Medtr4g133620	'17.2.3'	'hormone metabolism.auxin.induced-regulated-responsive-activated'	eukaryote (InterPro:IPR004877)
Medtr5g021820	'17.2.3'	'hormone metabolism.auxin.induced-regulated-responsive-activated'	T
Medtr7g114990	'17.2.3'	'hormone metabolism.auxin.induced-regulated-responsive-activated'	Aldo/keto reductase subgroup (InterPro:IPR020471); BEST Arabidopsis thaliana protein match is: NAD(P)-linked oxidoreductase superfamily protein (TAIR:AT1G60730.1); Has 30719 Blast hits to 30695 proteins in 2595 species: Archae - 650; Bacteria - 20319; Metazoa - 1822; Fungi - 2308; Plants - 1286; Viruses - 0; Other Eukaryotes - 4334 (source: NCBI BLink). & (p40691|a115_tobac : 339.0) Auxin-induced…
Medtr7g117375	'17.2.3'	'hormone metabolism.auxin.induced-regulated-responsive-activated'	eukaryote (InterPro:IPR004877)
Medtr4g092640	'17.3.1.2.99'	'hormone metabolism.brassinosteroid.synthesis-degradation.sterols.other'	based on sequence similarities
Medtr3g449240	'17.3.2.1'	'hormone metabolism.brassinosteroid.signal transduction.BRI'	defense response to fungus
Medtr2g008390	'17.3.2.99'	'hormone metabolism.brassinosteroid.signal transduction.other'	when BAK1 and BRI1 are coexpressed
Medtr4g117330	'17.4.1'	'hormone metabolism.cytokinin.synthesis-degradation'	T
Medtr1g032140	'17.5.1'	'hormone metabolism.ethylene.synthesis-degradation'	the last step in ethylene biosynthesis) involved in ethylene synthesis and fruit ripening in tomato. This gene is not induced by ethylene in siliques. The transcript is found in siliques
Medtr3g083370	'17.5.1.2'	'hormone metabolism.ethylene.synthesis-degradation.1-aminocyclopropane-1-carboxylate oxidase'	ethylene biosynthetic process; EXPRESSED IN: 22 plant structures; EXPRESSED DURING: 13 growth stages; CONTAINS InterPro DOMAIN/s: Oxoglutarate/iron-dependent oxygenase (InterPro:IPR005123); BEST Arabidopsis thaliana protein match is: 2-oxoglutarate (2OG) and Fe(II)-dependent oxygenase superfamily protein (TAIR:AT1G12010.1); Has 8587 Blast hits to 8552 proteins in 1009 species: Archae - 0; Bacteri…
Medtr5g085330	'17.5.1.2'	'hormone metabolism.ethylene.synthesis-degradation.1-aminocyclopropane-1-carboxylate oxidase'	ethylene biosynthetic process; EXPRESSED IN: 22 plant structures; EXPRESSED DURING: 13 growth stages; CONTAINS InterPro DOMAIN/s: Oxoglutarate/iron-dependent oxygenase (InterPro:IPR005123); BEST Arabidopsis thaliana protein match is: 2-oxoglutarate (2OG) and Fe(II)-dependent oxygenase superfamily protein (TAIR:AT1G12010.1); Has 8587 Blast hits to 8552 proteins in 1009 species: Archae - 0; Bacteri…
Medtr1g043350	'17.5.2'	'hormone metabolism.ethylene.signal transduction'	ATERF-2
Medtr8g006815	'17.5.2'	'hormone metabolism.ethylene.signal transduction'	ATERF-2
Medtr5g014240	'17.6.1.4'	'hormone metabolism.gibberelin.synthesis-degradation.ent-kaurenoic acid hydroxylase/oxygenase'	B-class (InterPro:IPR002397)
Medtr3g479460	'17.7.1.2'	'hormone metabolism.jasmonate.synthesis-degradation.lipoxygenase'	chloroplast precursor (EC 1.13.11.12) - Oryza sativa (Rice) & (at3g45140 : 926.0) Chloroplast lipoxygenase required for wound-induced jasmonic acid accumulation in Arabidopsis.Mutants are resistant to Staphylococcus aureus and accumulate salicylic acid upon infection.; lipoxygenase 2 (LOX2); FUNCTIONS IN: lipoxygenase activity; INVOLVED IN: in 7 processes; LOCATED IN: chloroplast thylakoid membra…
Medtr4g088810	'17.7.1.2'	'hormone metabolism.jasmonate.synthesis-degradation.lipoxygenase'	acting on single donors with incorporation of molecular oxygen
Medtr8g018690	'17.7.1.2'	'hormone metabolism.jasmonate.synthesis-degradation.lipoxygenase'	C-terminal & (p09918|lox3_pea : 1229.0) Seed lipoxygenase-3 (EC 1.13.11.12) - Pisum sativum (Garden pea) & (gnl|cdd|84680 : 1031.0) no description available & (at3g22400 : 923.0) LOX5; FUNCTIONS IN: oxidoreductase activity
Medtr5g006750	'17.7.1.5'	'hormone metabolism.jasmonate.synthesis-degradation.12-Oxo-PDA-reductase'	it shows very little activity with the naturally occurring OPDA isomer. Shows activity towards 2
Medtr4g094805	'18'	'Co-factor and vitamine metabolism'	nicotinate nucleotide salvage; LOCATED IN: cellular_component unknown; EXPRESSED IN: 22 plant structures; EXPRESSED DURING: 13 growth stages; CONTAINS InterPro DOMAIN/s: Nicotinate phosphoribosyltransferase-related (InterPro:IPR007229)
Medtr2g009270	'18.3.1'	'Co-factor and vitamine metabolism.riboflavin.GTP cyclohydrolase II'	4-dihydroxy-2-butanone-4-phosphate synthase activity which makes it a bifunctional enzyme involved in the formation of the pyrimidine and of the carbohydrate from GTP and ribulose-5-phosphate
Medtr4g123030	'2.2.1.3.1'	'major CHO metabolism.degradation.sucrose.invertases.neutral'	beta-fructofuranosidase activity; INVOLVED IN: biological_process unknown; EXPRESSED IN: 23 plant structures; EXPRESSED DURING: 13 growth stages; CONTAINS InterPro DOMAIN/s: Plant neutral invertase (InterPro:IPR006937)
Medtr1g015940	'2.2.1.3.2'	'major CHO metabolism.degradation.sucrose.invertases.cell wall'	family 32 (InterPro:IPR001362)
Medtr0419s0050	'2.2.1.5'	'major CHO metabolism.degradation.sucrose.Susy'	plant/cyanobacteria (InterPro:IPR012820)
Medtr3g064610	'2.2.1.5'	'major CHO metabolism.degradation.sucrose.Susy'	plant/cyanobacteria (InterPro:IPR012820)
Medtr6g478000	'2.2.1.5'	'major CHO metabolism.degradation.sucrose.Susy'	plant/cyanobacteria (InterPro:IPR012820)
Medtr6g478030	'2.2.1.5'	'major CHO metabolism.degradation.sucrose.Susy'	plant/cyanobacteria (InterPro:IPR012820)
Medtr4g045667	'2.2.2.1.2'	'major CHO metabolism.degradation.starch.starch cleavage.beta amylase'	4-alpha-D-glucan maltohydrolase) - Medicago sativa (Alfalfa) & (at4g15210 : 749.0) cytosolic beta-amylase expressed in rosette leaves and inducible by sugar. RAM1 mutants have reduced beta amylase in leaves and stems.; ARABIDOPSIS THALIANA BETA-AMYLASE (ATBETA-AMY); FUNCTIONS IN: beta-amylase activity; INVOLVED IN: response to herbivore
Medtr0003s0090	'20.1'	'stress.biotic'	putative; FUNCTIONS IN: transmembrane receptor activity
Medtr0277s0010	'20.1'	'stress.biotic'	ATP binding; INVOLVED IN: signal transduction
Medtr0277s0020	'20.1'	'stress.biotic'	ATP binding; INVOLVED IN: signal transduction
Medtr0349s0020	'20.1'	'stress.biotic'	ATP binding; INVOLVED IN: signal transduction
Medtr0419s0040	'20.1'	'stress.biotic'	ATP binding; INVOLVED IN: signal transduction
Medtr1g021100	'20.1'	'stress.biotic'	defense response; LOCATED IN: apoplast; EXPRESSED IN: 22 plant structures; EXPRESSED DURING: 13 growth stages; CONTAINS InterPro DOMAIN/s: NB-ARC (InterPro:IPR002182)
Medtr1g036750	'20.1'	'stress.biotic'	nucleotide binding
Medtr1g040175	'20.1'	'stress.biotic'	transferring acyl groups other than amino-acyl groups; INVOLVED IN: biological_process unknown; LOCATED IN: cellular_component unknown; EXPRESSED IN: 9 plant structures; EXPRESSED DURING: 4 anthesis
Medtr1g040195	'20.1'	'stress.biotic'	transferring acyl groups other than amino-acyl groups; INVOLVED IN: biological_process unknown; LOCATED IN: cellular_component unknown; EXPRESSED IN: 9 plant structures; EXPRESSED DURING: 4 anthesis
Medtr1g040215	'20.1'	'stress.biotic'	transferring acyl groups other than amino-acyl groups; INVOLVED IN: biological_process unknown; LOCATED IN: cellular_component unknown; EXPRESSED IN: 9 plant structures; EXPRESSED DURING: 4 anthesis
Medtr1g050402	'20.1'	'stress.biotic'	apoptosis; CONTAINS InterPro DOMAIN/s: NB-ARC (InterPro:IPR002182)
Medtr1g062630	'20.1'	'stress.biotic'	PR5-like receptor kinase; PR5-like receptor kinase (PR5K); FUNCTIONS IN: transmembrane receptor protein serine/threonine kinase activity
Medtr1g076400	'20.1'	'stress.biotic'	binding; INVOLVED IN: protein ubiquitination; LOCATED IN: plasma membrane; EXPRESSED IN: 23 plant structures; EXPRESSED DURING: 13 growth stages; CONTAINS InterPro DOMAIN/s: U box domain (InterPro:IPR003613)
Medtr1g109630	'20.1'	'stress.biotic'	LP.04 four leaves visible
Medtr2g034680	'20.1'	'stress.biotic'	LP.10 ten leaves visible
Medtr2g037150	'20.1'	'stress.biotic'	nucleoside-triphosphatase activity
Medtr2g078260	'20.1'	'stress.biotic'	defense response; LOCATED IN: endomembrane system; EXPRESSED IN: 7 plant structures; EXPRESSED DURING: 9 growth stages; CONTAINS InterPro DOMAIN/s: Leucine-rich repeat
Medtr2g086790	'20.1'	'stress.biotic'	group 2 (InterPro:IPR004864); BEST Arabidopsis thaliana protein match is: Late embryogenesis abundant (LEA) hydroxyproline-rich glycoprotein family (TAIR:AT5G22200.1); Has 838 Blast hits to 838 proteins in 28 species: Archae - 0; Bacteria - 0; Metazoa - 0; Fungi - 0; Plants - 838; Viruses - 0; Other Eukaryotes - 0 (source: NCBI BLink). & (gnl|cdd|70773 : 139.0) no description available & (reliabi…
Medtr3g015560	'20.1'	'stress.biotic'	defense response; LOCATED IN: endomembrane system; EXPRESSED IN: 23 plant structures; EXPRESSED DURING: 14 growth stages; CONTAINS InterPro DOMAIN/s: Leucine-rich repeat-containing protein (InterPro:IPR015766)
Medtr3g058880	'20.1'	'stress.biotic'	putative; FUNCTIONS IN: transmembrane receptor activity
Medtr3g062220	'20.1'	'stress.biotic'	apoptosis; CONTAINS InterPro DOMAIN/s: NB-ARC (InterPro:IPR002182)
Medtr3g079340	'20.1'	'stress.biotic'	class 3 (InterPro:IPR002921); BEST Arabidopsis thaliana protein match is: alpha/beta-Hydrolases superfamily protein (TAIR:AT3G48080.1); Has 35333 Blast hits to 34131 proteins in 2444 species: Archae - 798; Bacteria - 22429; Metazoa - 974; Fungi - 991; Plants - 531; Viruses - 0; Other Eukaryotes - 9610 (source: NCBI BLink). & (gnl|cdd|85661 : 84.6) no description available & (reliability: 808.0) &…
Medtr3g464810	'20.1'	'stress.biotic'	nucleotide binding
Medtr4g013325	'20.1'	'stress.biotic'	lignan biosynthetic process
Medtr4g013335	'20.1'	'stress.biotic'	defense response; LOCATED IN: endomembrane system; EXPRESSED IN: 22 plant structures; EXPRESSED DURING: 13 growth stages; CONTAINS InterPro DOMAIN/s: Plant disease resistance response protein (InterPro:IPR004265); BEST Arabidopsis thaliana protein match is: Disease resistance-responsive (dirigent-like protein) family protein (TAIR:AT5G49040.1). & (gnl|cdd|66675 : 148.0) no description available &…
Medtr4g013345	'20.1'	'stress.biotic'	defense response; LOCATED IN: endomembrane system; EXPRESSED IN: 22 plant structures; EXPRESSED DURING: 13 growth stages; CONTAINS InterPro DOMAIN/s: Plant disease resistance response protein (InterPro:IPR004265); BEST Arabidopsis thaliana protein match is: Disease resistance-responsive (dirigent-like protein) family protein (TAIR:AT5G49040.1). & (gnl|cdd|66675 : 145.0) no description available &…
Medtr4g014120	'20.1'	'stress.biotic'	nucleoside-triphosphatase activity
Medtr4g014140	'20.1'	'stress.biotic'	nucleoside-triphosphatase activity
Medtr4g016790	'20.1'	'stress.biotic'	typical subtype (InterPro:IPR003591)
Medtr4g016800	'20.1'	'stress.biotic'	type 2 (InterPro:IPR013210)
Medtr4g050910	'20.1'	'stress.biotic'	putative; FUNCTIONS IN: transmembrane receptor activity
Medtr4g051662	'20.1'	'stress.biotic'	ATP binding; INVOLVED IN: signal transduction
Medtr4g051698	'20.1'	'stress.biotic'	ATP binding; INVOLVED IN: signal transduction
Medtr4g051715	'20.1'	'stress.biotic'	ATP binding; INVOLVED IN: signal transduction
Medtr4g051738	'20.1'	'stress.biotic'	ATP binding; INVOLVED IN: signal transduction
Medtr4g091380	'20.1'	'stress.biotic'	defense response; LOCATED IN: cellular_component unknown; CONTAINS InterPro DOMAIN/s: Leucine-rich repeat-containing protein (InterPro:IPR015766)
Medtr5g018210	'20.1'	'stress.biotic'	defense response; CONTAINS InterPro DOMAIN/s: NB-ARC (InterPro:IPR002182)
Medtr5g063740	'20.1'	'stress.biotic'	defense response; LOCATED IN: membrane; EXPRESSED IN: leaf; CONTAINS InterPro DOMAIN/s: Leucine-rich repeat-containing N-terminal domain
Medtr6g008140	'20.1'	'stress.biotic'	putative; FUNCTIONS IN: transmembrane receptor activity
Medtr6g009480	'20.1'	'stress.biotic'	pathogenesis-related (InterPro:IPR001938); BEST Arabidopsis thaliana protein match is: Pathogenesis-related thaumatin superfamily protein (TAIR:AT4G38660.1); Has 1558 Blast hits to 1540 proteins in 173 species: Archae - 0; Bacteria - 31; Metazoa - 56; Fungi - 80; Plants - 1384; Viruses - 0; Other Eukaryotes - 7 (source: NCBI BLink). & (gnl|cdd|47535 : 211.0) no description available & (p83335|tlp…
Medtr6g016810	'20.1'	'stress.biotic'	acting on glycosyl bonds
Medtr6g038820	'20.1'	'stress.biotic'	defense response to fungus
Medtr6g069560	'20.1'	'stress.biotic'	ATP binding; INVOLVED IN: signal transduction
Medtr6g074090	'20.1'	'stress.biotic'	putative; FUNCTIONS IN: transmembrane receptor activity
Medtr6g074810	'20.1'	'stress.biotic'	putative; FUNCTIONS IN: transmembrane receptor activity
Medtr6g472230	'20.1'	'stress.biotic'	ATP binding; INVOLVED IN: signal transduction
Medtr6g472300	'20.1'	'stress.biotic'	ATP binding; INVOLVED IN: signal transduction
Medtr7g009510	'20.1'	'stress.biotic'	defense response; LOCATED IN: membrane; EXPRESSED IN: leaf; CONTAINS InterPro DOMAIN/s: Leucine-rich repeat-containing N-terminal domain
Medtr7g013170	'20.1'	'stress.biotic'	acting on glycosyl bonds
Medtr7g015770	'20.1'	'stress.biotic'	defense response; LOCATED IN: cellular_component unknown; EXPRESSED IN: shoot; CONTAINS InterPro DOMAIN/s: NB-ARC (InterPro:IPR002182)
Medtr7g078640	'20.1'	'stress.biotic'	defense response; LOCATED IN: endomembrane system; EXPRESSED IN: 23 plant structures; EXPRESSED DURING: 14 growth stages; CONTAINS InterPro DOMAIN/s: Leucine-rich repeat-containing protein (InterPro:IPR015766)
Medtr7g093820	'20.1'	'stress.biotic'	T
Medtr7g093850	'20.1'	'stress.biotic'	T
Medtr7g106050	'20.1'	'stress.biotic'	group 2 (InterPro:IPR004864); BEST Arabidopsis thaliana protein match is: Late embryogenesis abundant (LEA) hydroxyproline-rich glycoprotein family (TAIR:AT3G52470.1); Has 917 Blast hits to 917 proteins in 27 species: Archae - 0; Bacteria - 0; Metazoa - 0; Fungi - 0; Plants - 917; Viruses - 0; Other Eukaryotes - 0 (source: NCBI BLink). & (gnl|cdd|70773 : 135.0) no description available & (reliabi…
Medtr7g117890	'20.1'	'stress.biotic'	binding; INVOLVED IN: protein ubiquitination; LOCATED IN: plasma membrane; EXPRESSED IN: 23 plant structures; EXPRESSED DURING: 13 growth stages; CONTAINS InterPro DOMAIN/s: U box domain (InterPro:IPR003613)
Medtr8g012960	'20.1'	'stress.biotic'	which is 'guarded' by R protein complex (RPM1 and RPS2 proteins). RIN4 physically interacts with RPS2 and RPM1 in vivo. Bacterial avirulence (Avr) effectors AvrB
Medtr8g018750	'20.1'	'stress.biotic'	ATP binding; INVOLVED IN: signal transduction
Medtr8g020300	'20.1'	'stress.biotic'	nucleoside-triphosphatase activity
Medtr8g032420	'20.1'	'stress.biotic'	putative; FUNCTIONS IN: transmembrane receptor activity
Medtr8g039950	'20.1'	'stress.biotic'	transferring acyl groups other than amino-acyl groups; INVOLVED IN: biological_process unknown; LOCATED IN: cellular_component unknown; EXPRESSED IN: 9 plant structures; EXPRESSED DURING: 4 anthesis
Medtr8g042660	'20.1'	'stress.biotic'	ATP binding; INVOLVED IN: signal transduction
Medtr8g074350	'20.1'	'stress.biotic'	defense response to fungus
Medtr8g099030	'20.1.1'	'stress.biotic.respiratory burst'	integral to plasma membrane; EXPRESSED IN: 22 plant structures; EXPRESSED DURING: 13 growth stages; CONTAINS InterPro DOMAIN/s: Ferredoxin reductase-type FAD-binding domain (InterPro:IPR017927)
Medtr6g074855	'20.1.2'	'stress.biotic.receptors'	nucleoside-triphosphatase activity
Medtr2g079500	'20.1.3.1'	'stress.biotic.signalling.MLO-like'	homologs of the barley mildew resistance locus o (MLO) protein. The Arabidopsis genome contains 15 genes encoding MLO proteins
Medtr8g073130	'20.1.3.1'	'stress.biotic.signalling.MLO-like'	homologs of the barley mildew resistance locus o (MLO) protein. The Arabidopsis genome contains 15 genes encoding MLO proteins
Medtr0006s0230	'20.1.7'	'stress.biotic.PR-proteins'	nucleotide binding
Medtr1g099240	'20.1.7'	'stress.biotic.PR-proteins'	defense response to fungus
Medtr2g037690	'20.1.7'	'stress.biotic.PR-proteins'	putative; FUNCTIONS IN: transmembrane receptor activity
Medtr2g079900	'20.1.7'	'stress.biotic.PR-proteins'	defense response
Medtr3g022400	'20.1.7'	'stress.biotic.PR-proteins'	defense response; LOCATED IN: endomembrane system; EXPRESSED IN: 23 plant structures; EXPRESSED DURING: 14 growth stages; CONTAINS InterPro DOMAIN/s: Leucine-rich repeat-containing protein (InterPro:IPR015766)
Medtr3g022930	'20.1.7'	'stress.biotic.PR-proteins'	ATP binding; INVOLVED IN: signal transduction
Medtr3g030980	'20.1.7'	'stress.biotic.PR-proteins'	defense response; LOCATED IN: endomembrane system; EXPRESSED IN: 23 plant structures; EXPRESSED DURING: 14 growth stages; CONTAINS InterPro DOMAIN/s: Leucine-rich repeat-containing protein (InterPro:IPR015766)
Medtr4g018970	'20.1.7'	'stress.biotic.PR-proteins'	defense response to fungus
Medtr4g023400	'20.1.7'	'stress.biotic.PR-proteins'	ATP binding; INVOLVED IN: signal transduction
Medtr4g051682	'20.1.7'	'stress.biotic.PR-proteins'	putative; FUNCTIONS IN: transmembrane receptor activity
Medtr4g051688	'20.1.7'	'stress.biotic.PR-proteins'	putative; FUNCTIONS IN: transmembrane receptor activity
Medtr5g018910	'20.1.7'	'stress.biotic.PR-proteins'	defense response; CONTAINS InterPro DOMAIN/s: NB-ARC (InterPro:IPR002182)
Medtr5g069580	'20.1.7'	'stress.biotic.PR-proteins'	typical subtype (InterPro:IPR003591)
Medtr5g086690	'20.1.7'	'stress.biotic.PR-proteins'	ATP binding; INVOLVED IN: signal transduction
Medtr5g092990	'20.1.7'	'stress.biotic.PR-proteins'	putative; FUNCTIONS IN: transmembrane receptor activity
Medtr6g015730	'20.1.7'	'stress.biotic.PR-proteins'	ATP binding; INVOLVED IN: signal transduction
Medtr6g015775	'20.1.7'	'stress.biotic.PR-proteins'	ATP binding; INVOLVED IN: signal transduction
Medtr6g038790	'20.1.7'	'stress.biotic.PR-proteins'	defense response to fungus
Medtr6g038940	'20.1.7'	'stress.biotic.PR-proteins'	defense response to fungus
Medtr6g039180	'20.1.7'	'stress.biotic.PR-proteins'	defense response to fungus
Medtr6g071925	'20.1.7'	'stress.biotic.PR-proteins'	putative; FUNCTIONS IN: transmembrane receptor activity
Medtr6g072290	'20.1.7'	'stress.biotic.PR-proteins'	putative; FUNCTIONS IN: transmembrane receptor activity
Medtr6g072780	'20.1.7'	'stress.biotic.PR-proteins'	putative; FUNCTIONS IN: transmembrane receptor activity
Medtr6g074620	'20.1.7'	'stress.biotic.PR-proteins'	putative; FUNCTIONS IN: transmembrane receptor activity
Medtr7g014430	'20.1.7'	'stress.biotic.PR-proteins'	defense response to fungus
Medtr8g089000	'20.1.7'	'stress.biotic.PR-proteins'	defense response to fungus
Medtr5g090770	'20.1.7.10'	'stress.biotic.PR-proteins.NPR'	TGA3
Medtr6g078070	'20.1.7.6.1'	'stress.biotic.PR-proteins.proteinase inhibitors.trypsin inhibitor'	cell wall; EXPRESSED IN: 17 plant structures; EXPRESSED DURING: 13 growth stages; CONTAINS InterPro DOMAIN/s: Proteinase inhibitor I3
Medtr0086s0010	'20.2'	'stress.abiotic'	plant homologs of mammalian regulators of apoptosis. Plant BAG proteins are multi-functional and remarkably similar to their animal counterparts
Medtr3g087950	'20.2'	'stress.abiotic'	EC 2.3.2.2) that is located in vascular tissues (predominantly phloem) of leaves and is involved in the degradation of glutathione. The encoded enzyme also mitigates oxidative stress by metabolizing GSSG (oxidized form of GSH - glutathione) in the apoplast.; gamma-glutamyl transpeptidase 1 (GGT1); FUNCTIONS IN: gamma-glutamyltransferase activity
Medtr6g007770	'20.2'	'stress.abiotic'	Haem peroxidase
Medtr1g015165	'20.2.1'	'stress.abiotic.heat'	HSP20-like chaperone (InterPro:IPR008978); BEST Arabidopsis thaliana protein match is: heat shock protein 17.6A (TAIR:AT5G12030.1); Has 1807 Blast hits to 1807 proteins in 277 species: Archae - 0; Bacteria - 0; Metazoa - 736; Fungi - 347; Plants - 385; Viruses - 0; Other Eukaryotes - 339 (source: NCBI BLink). & (gnl|cdd|84439 : 123.0) no description available & (gnl|cdd|35929 : 121.0) no descript…
Medtr1g022415	'20.2.1'	'stress.abiotic.heat'	N-terminal (InterPro:IPR001623); BEST Arabidopsis thaliana protein match is: Chaperone DnaJ-domain superfamily protein (TAIR:AT4G12770.2); Has 187564 Blast hits to 104912 proteins in 3501 species: Archae - 1251; Bacteria - 31029; Metazoa - 79517; Fungi - 15919; Plants - 9547; Viruses - 688; Other Eukaryotes - 49613 (source: NCBI BLink). & (gnl|cdd|35652 : 161.0) no description available & (reliab…
Medtr1g087270	'20.2.1'	'stress.abiotic.heat'	heat shock protein binding; INVOLVED IN: protein folding; LOCATED IN: cellular_component unknown; EXPRESSED IN: leaf; CONTAINS InterPro DOMAIN/s: Tetratricopeptide-like helical (InterPro:IPR011990)
Medtr4g088475	'20.2.1'	'stress.abiotic.heat'	HSP20-like chaperone (InterPro:IPR008978); BEST Arabidopsis thaliana protein match is: heat shock protein 17.4 (TAIR:AT3G46230.1); Has 7090 Blast hits to 7089 proteins in 1610 species: Archae - 175; Bacteria - 4287; Metazoa - 66; Fungi - 302; Plants - 1606; Viruses - 0; Other Eukaryotes - 654 (source: NCBI BLink). & (gnl|cdd|84439 : 108.0) no description available & (gnl|cdd|35929 : 97.9) no desc…
Medtr5g087480	'20.2.1'	'stress.abiotic.heat'	HSP20-like chaperone (InterPro:IPR008978); BEST Arabidopsis thaliana protein match is: HSP20-like chaperones superfamily protein (TAIR:AT5G20970.1); Has 712 Blast hits to 708 proteins in 96 species: Archae - 0; Bacteria - 37; Metazoa - 7; Fungi - 2; Plants - 649; Viruses - 0; Other Eukaryotes - 17 (source: NCBI BLink). & (reliability: 171.0) & (original description: no original description)'
Medtr7g024390	'20.2.1'	'stress.abiotic.heat'	response to cold
Medtr7g109340	'20.2.1'	'stress.abiotic.heat'	heat shock protein binding; INVOLVED IN: protein folding
Medtr2g088770	'20.2.2'	'stress.abiotic.cold'	heme binding; INVOLVED IN: response to oxidative stress
[truncated: 629 more rows]

## Sheet: 6 profile age
IDENTIFIER	BINCODE	NAME Mapman annotation	TYPE
[truncated: 918 more rows]

## Sheet: 7 profile age
IDENTIFIER	BINCODE	NAME Mapman annotation	TYPE
[truncated: 170 more rows]

## Sheet: 10 profile age
IDENTIFIER	BINCODE	NAME Mapman annotation	TYPE
[truncated: 422 more rows]

## Sheet: 18 profile age
IDENTIFIER	BINCODE	NAME Mapman annotation	TYPE
[truncated: 104 more rows]

## Sheet: Combined 31-38 age
IDENTIFIER	BINCODE	NAME Mapman annotation	TYPE
[truncated: 2,204 more rows]

[truncated: 5 more sheets: 31 profile age, 34 profile age, 35 profile age, 38 profile age, 39 profile age]
