# Supplementary material for: Transcriptional Programs and Regulators Underlying Age-Dependent and Dark-Induced Senescence in Medicago truncatula
Source: Cells. 2022 May 6;11(9):1570. doi: 10.3390/cells11091570 (PMC9103780; doi:10.3390/cells11091570)
Supplement: Supplementary file 1 [file cells-11-01570-s001.zip › Supplementary Dataset S4. GO terms based on STEM profiles of DE genes during age-dependent senescence.xlsx]

## Sheet: 0 profile age GO
REG-MAP				REVIGO
GO.ID	p-value	Description		GO.ID	log10 p-value	Description
GO:0006952	3.2e-10	defense response		GO:0006952	-9.4949	defense response
GO:0007154	2e-07	cell communication		GO:0007154	-6.699	cell communication
GO:0006950	1.1e-06	response to stress		GO:0006950	-5.9586	response to stress
GO:0007165	2.4e-06	signal transduction		GO:0007165	-5.6198	signal transduction
GO:0044700	2.8e-06	single organism signaling		GO:0023052	-5.5376	signaling
GO:0023052	2.9e-06	signaling		GO:0019748	-5.2518	secondary metabolic process
GO:0019748	5.6e-06	secondary metabolic process		GO:0006468	-4.8239	protein phosphorylation
GO:0009808	1.3e-05	lignin metabolic process		GO:0009627	-4.7959	systemic acquired resistance
GO:0006468	1.5e-05	protein phosphorylation		GO:0009834	-4.4815	plant-type secondary cell wall biogenesis
GO:0009627	1.6e-05	systemic acquired resistance		GO:0009698	-4.4318	phenylpropanoid metabolic process
GO:0009834	3.3e-05	plant-type secondary cell wall biogenesis		GO:0006558	-4.3768	L-phenylalanine metabolic process
GO:0009698	3.7e-05	phenylpropanoid metabolic process		GO:1902221	-4.3768	erythrose 4-phosphate/phosphoenolpyruvate family amino acid metabolic process
GO:0006558	4.2e-05	L-phenylalanine metabolic process		GO:0072330	-4.301	monocarboxylic acid biosynthetic process
GO:1902221	4.2e-05	erythrose 4-phosphate/phosphoenolpyruvate family amino acid metabolic process		GO:0010025	-4.2218	wax biosynthetic process
GO:0072330	5e-05	monocarboxylic acid biosynthetic process		GO:0010166	-4.0809	wax metabolic process
GO:0010025	6e-05	wax biosynthetic process		GO:0009607	-3.8861	response to biotic stimulus
GO:0010166	8.3e-05	wax metabolic process		GO:0016310	-3.8239	phosphorylation
GO:0009607	0.00013	response to biotic stimulus		GO:0042546	-3.7447	cell wall biogenesis
GO:0016053	0.00015	organic acid biosynthetic process		GO:0009095	-3.7447	aromatic amino acid family biosynthetic process, prephenate pathway
GO:0046394	0.00015	carboxylic acid biosynthetic process		GO:0044711	-3.6198	single-organism biosynthetic process
GO:0016310	0.00015	phosphorylation		GO:0002376	-3.5376	immune system process
GO:0009095	0.00018	aromatic amino acid family biosynthetic process, prephenate pathway		GO:0050896	-3.4202	response to stimulus
GO:0042546	0.00018	cell wall biogenesis		GO:0010243	-3.3768	response to organonitrogen compound
GO:0009832	0.00021	plant-type cell wall biogenesis		GO:0044283	-3.3768	small molecule biosynthetic process
GO:0009800	0.00022	cinnamic acid biosynthetic process		GO:0042537	-3.3188	benzene-containing compound metabolic process
GO:0009803	0.00022	cinnamic acid metabolic process		GO:0005975	-3.3098	carbohydrate metabolic process
GO:0044711	0.00024	single-organism biosynthetic process		GO:0006793	-3.2441	phosphorus metabolic process
GO:0043207	0.00027	response to external biotic stimulus		GO:0009072	-3.2366	aromatic amino acid family metabolic process
GO:0051707	0.00027	response to other organism		GO:0044763	-3.2076	single-organism cellular process
GO:0002376	0.00029	immune system process		GO:0009696	-3.1739	salicylic acid metabolic process
GO:0050896	0.00038	response to stimulus		GO:0044712	-3.0969	single-organism catabolic process
GO:0010200	0.00038	response to chitin		GO:0046244	-3.0969	salicylic acid catabolic process
GO:0071669	0.00039	plant-type cell wall organization or biogenesis		GO:0034637	-2.9547	cellular carbohydrate biosynthetic process
GO:0010243	0.00042	response to organonitrogen compound		GO:0006629	-2.8894	lipid metabolic process
GO:0044283	0.00042	small molecule biosynthetic process		GO:0044262	-2.7799	cellular carbohydrate metabolic process
GO:0042537	0.00048	benzene-containing compound metabolic process		GO:0031347	-2.7747	regulation of defense response
GO:0005975	0.00049	carbohydrate metabolic process		GO:0030497	-2.6289	fatty acid elongation
GO:0006796	0.00051	phosphate-containing compound metabolic process		GO:0002229	-2.5901	defense response to oomycetes
GO:0006793	0.00057	phosphorus metabolic process		GO:0071554	-2.5735	cell wall organization or biogenesis
GO:0009072	0.00058	aromatic amino acid family metabolic process		GO:0042335	-2.5114	cuticle development
GO:0044763	0.00062	single-organism cellular process		GO:0060548	-2.5114	negative regulation of cell death
GO:0009696	0.00067	salicylic acid metabolic process		GO:0002239	-2.5114	response to oomycetes
GO:0044712	0.0008	single-organism catabolic process		GO:0009605	-2.4976	response to external stimulus
GO:0046244	0.0008	salicylic acid catabolic process		GO:0002682	-2.4828	regulation of immune system process
GO:0009814	0.00084	defense response, incompatible interaction		GO:0042743	-2.3893	hydrogen peroxide metabolic process
GO:0051274	0.00094	beta-glucan biosynthetic process		GO:0044703	-2.383	multi-organism reproductive process
GO:0009699	0.00108	phenylpropanoid biosynthetic process		GO:0008037	-2.3665	cell recognition
GO:0030244	0.00108	cellulose biosynthetic process		GO:0043447	-2.3363	alkane biosynthetic process
GO:0034637	0.00111	cellular carbohydrate biosynthetic process		GO:0043446	-2.3363	cellular alkane metabolic process
GO:0006559	0.00113	L-phenylalanine catabolic process		GO:0002679	-2.3363	respiratory burst involved in defense response
GO:1902222	0.00113	erythrose 4-phosphate/phosphoenolpyruvate family amino acid catabolic process		GO:0048281	-2.3363	inflorescence morphogenesis
GO:0098542	0.00116	defense response to other organism		GO:0032787	-2.2716	monocarboxylic acid metabolic process
GO:0006629	0.00129	lipid metabolic process		GO:0046470	-2.1891	phosphatidylcholine metabolic process
GO:0051273	0.00146	beta-glucan metabolic process		GO:0040011	-2.1805	locomotion
GO:0044550	0.00147	secondary metabolite biosynthetic process		GO:0018958	-2.1805	phenol-containing compound metabolic process
GO:0033692	0.00149	cellular polysaccharide biosynthetic process		GO:0045730	-2.1232	respiratory burst
GO:0044262	0.00166	cellular carbohydrate metabolic process		GO:0009819	-2.1232	drought recovery
GO:0031347	0.00168	regulation of defense response		GO:0000038	-2.1013	very long-chain fatty acid metabolic process
GO:0030243	0.00188	cellulose metabolic process		GO:0042439	-2.02	ethanolamine-containing compound metabolic process
GO:0009250	0.00195	glucan biosynthetic process
GO:0006633	0.00212	fatty acid biosynthetic process
GO:0009862	0.00232	systemic acquired resistance, salicylic acid mediated signaling pathway
GO:0030497	0.00235	fatty acid elongation
GO:0002229	0.00257	defense response to oomycetes
GO:0071554	0.00267	cell wall organization or biogenesis
GO:0002239	0.00308	response to oomycetes
GO:0042335	0.00308	cuticle development
GO:0060548	0.00308	negative regulation of cell death
GO:0010112	0.00313	regulation of systemic acquired resistance
GO:0009605	0.00318	response to external stimulus
GO:0006464	0.00322	cellular protein modification process
GO:0036211	0.00322	protein modification process
GO:0002682	0.00329	regulation of immune system process
GO:0009617	0.00332	response to bacterium
GO:0006631	0.00345	fatty acid metabolic process
GO:0042742	0.00359	defense response to bacterium
GO:0051716	0.00383	cellular response to stimulus
GO:0042743	0.00408	hydrogen peroxide metabolic process
GO:0048544	0.00408	recognition of pollen
GO:0044703	0.00414	multi-organism reproductive process
GO:0009863	0.00427	salicylic acid mediated signaling pathway
GO:0046271	0.00427	phenylpropanoid catabolic process
GO:0046274	0.00427	lignin catabolic process
GO:0008037	0.0043	cell recognition
GO:0002679	0.00461	respiratory burst involved in defense response
GO:0019336	0.00461	phenol-containing compound catabolic process
GO:0043446	0.00461	cellular alkane metabolic process
GO:0043447	0.00461	alkane biosynthetic process
GO:0048281	0.00461	inflorescence morphogenesis
GO:0000271	0.00463	polysaccharide biosynthetic process
GO:0080134	0.00479	regulation of response to stress
GO:0009875	0.00504	pollen-pistil interaction
GO:2000652	0.00519	regulation of secondary cell wall biogenesis
GO:0032787	0.00535	monocarboxylic acid metabolic process
GO:0045087	0.00546	innate immune response
GO:0009809	0.00575	lignin biosynthetic process
GO:0044264	0.00621	cellular polysaccharide metabolic process
GO:0046470	0.00647	phosphatidylcholine metabolic process
GO:0018958	0.0066	phenol-containing compound metabolic process
GO:0040011	0.0066	locomotion
GO:0071446	0.0066	cellular response to salicylic acid stimulus
GO:0006955	0.00675	immune response
GO:0005984	0.00682	disaccharide metabolic process
GO:0009073	0.00702	aromatic amino acid family biosynthetic process
GO:0009819	0.00753	drought recovery
GO:0045730	0.00753	respiratory burst
GO:0000038	0.00792	very long-chain fatty acid metabolic process
GO:0009074	0.00792	aromatic amino acid family catabolic process
GO:0045088	0.00799	regulation of innate immune response
GO:0002831	0.00852	regulation of response to biotic stimulus
GO:0042439	0.00955	ethanolamine-containing compound metabolic process
GO:0016051	0.00965	carbohydrate biosynthetic process
GO:0050776	0.01	regulation of immune response

## Sheet: 6 profile age GO
REG-MAP				REVIGO
GO.ID	p-value	Description		GO.ID	log10 p-value	Description
GO:0071554	2.2e-11	cell wall organization or biogenesis		GO:0071554	-10.6576	cell wall organization or biogenesis
GO:0005975	4.8e-10	carbohydrate metabolic process		GO:0005975	-9.3188	carbohydrate metabolic process
GO:0042546	3.5e-09	cell wall biogenesis		GO:0042546	-8.4559	cell wall biogenesis
GO:0045229	2.8e-08	external encapsulating structure organization		GO:0045229	-7.5528	external encapsulating structure organization
GO:0071669	4.4e-08	plant-type cell wall organization or biogenesis		GO:0009698	-6.8861	phenylpropanoid metabolic process
GO:0071555	6.4e-08	cell wall organization		GO:0009832	-6.8239	plant-type cell wall biogenesis
GO:0009698	1.3e-07	phenylpropanoid metabolic process		GO:0005976	-5.6021	polysaccharide metabolic process
GO:0009832	1.5e-07	plant-type cell wall biogenesis		GO:0007018	-5.4815	microtubule-based movement
GO:0009834	3.2e-07	plant-type secondary cell wall biogenesis		GO:0006928	-5.3665	movement of cell or subcellular component
GO:0009808	1.4e-06	lignin metabolic process		GO:0019748	-5.3565	secondary metabolic process
GO:0005976	2.5e-06	polysaccharide metabolic process		GO:0007017	-5.1871	microtubule-based process
GO:0046271	2.8e-06	phenylpropanoid catabolic process		GO:0010033	-4.7959	response to organic substance
GO:0046274	2.8e-06	lignin catabolic process		GO:0044264	-4.0862	cellular polysaccharide metabolic process
GO:0007018	3.3e-06	microtubule-based movement		GO:0044262	-3.6778	cellular carbohydrate metabolic process
GO:0006928	4.3e-06	movement of cell or subcellular component		GO:0009719	-3.5528	response to endogenous stimulus
GO:0019748	4.4e-06	secondary metabolic process		GO:0016051	-3.3872	carbohydrate biosynthetic process
GO:0007017	6.5e-06	microtubule-based process		GO:0009725	-3.2676	response to hormone
GO:0010033	1.6e-05	response to organic substance		GO:0044763	-3.0458	single-organism cellular process
GO:0044264	8.2e-05	cellular polysaccharide metabolic process		GO:0050829	-2.9747	defense response to Gram-negative bacterium
GO:0009699	0.00016	phenylpropanoid biosynthetic process		GO:0042221	-2.9172	response to chemical
GO:0044262	0.00021	cellular carbohydrate metabolic process		GO:1901700	-2.8761	response to oxygen-containing compound
GO:0010410	0.00027	hemicellulose metabolic process		GO:0033591	-2.6478	response to L-ascorbic acid
GO:0034637	0.00028	cellular carbohydrate biosynthetic process		GO:0042335	-2.5436	cuticle development
GO:0009719	0.00028	response to endogenous stimulus		GO:0009741	-2.5186	response to brassinosteroid
GO:0033692	0.00035	cellular polysaccharide biosynthetic process		GO:0009767	-2.4622	photosynthetic electron transport chain
GO:0000271	0.00039	polysaccharide biosynthetic process		GO:0048869	-2.4401	cellular developmental process
GO:0016051	0.00041	carbohydrate biosynthetic process		GO:0071840	-2.4179	cellular component organization or biogenesis
GO:0009725	0.00054	response to hormone		GO:0048829	-2.4145	root cap development
GO:0009733	0.00057	response to auxin		GO:0072348	-2.4012	sulfur compound transport
GO:0051274	0.00083	beta-glucan biosynthetic process		GO:0051817	-2.3344	modification of morphology or physiology of other organism involved in symbiotic interaction
GO:0044763	0.0009	single-organism cellular process		GO:0010817	-2.2798	regulation of hormone levels
GO:0010383	0.00093	cell wall polysaccharide metabolic process		GO:0044723	-2.2366	single-organism carbohydrate metabolic process
GO:0030244	0.00096	cellulose biosynthetic process		GO:0044085	-2.2314	cellular component biogenesis
GO:0050829	0.00106	defense response to Gram-negative bacterium		GO:0048316	-2.2211	seed development
GO:0006073	0.00116	cellular glucan metabolic process		GO:0009624	-2.1904	response to nematode
GO:0044042	0.00116	glucan metabolic process		GO:0009607	-2.1884	response to biotic stimulus
GO:0042221	0.00121	response to chemical		GO:0016246	-2.1537	RNA interference
GO:0044550	0.00129	secondary metabolite biosynthetic process		GO:0043622	-2.1255	cortical microtubule organization
GO:1901700	0.00133	response to oxygen-containing compound		GO:0090376	-2.0991	seed trichome differentiation
GO:0045491	0.00149	xylan metabolic process		GO:0007010	-2.0531	cytoskeleton organization
GO:0009833	0.00225	plant-type primary cell wall biogenesis		GO:0010025	-2.0443	wax biosynthetic process
GO:0033591	0.00225	response to L-ascorbic acid		GO:0009743	-2.0088	response to carbohydrate
GO:0042335	0.00286	cuticle development
GO:0009741	0.00303	response to brassinosteroid
GO:0044036	0.00309	cell wall macromolecule metabolic process
GO:0048513	0.00342	organ development
GO:0009767	0.00345	photosynthetic electron transport chain
GO:0048869	0.00363	cellular developmental process
GO:0014070	0.00374	response to organic cyclic compound
GO:0071840	0.00382	cellular component organization or biogenesis
GO:0048829	0.00385	root cap development
GO:0045492	0.00397	xylan biosynthetic process
GO:0072348	0.00397	sulfur compound transport
GO:0009664	0.00425	plant-type cell wall organization
GO:0009888	0.00426	tissue development
GO:0009772	0.00463	photosynthetic electron transport in photosystem II
GO:0051817	0.00463	modification of morphology or physiology of other organism involved in symbiotic interaction
GO:0010154	0.00463	fruit development
GO:0051273	0.00484	beta-glucan metabolic process
GO:0010588	0.0049	cotyledon vascular tissue pattern formation
GO:0033993	0.00503	response to lipid
GO:0048731	0.00523	system development
GO:0010817	0.00525	regulation of hormone levels
GO:0009809	0.00535	lignin biosynthetic process
GO:0030422	0.00535	production of siRNA involved in RNA interference
GO:0044723	0.0058	single-organism carbohydrate metabolic process
GO:0044085	0.00587	cellular component biogenesis
GO:0048316	0.00601	seed development
GO:0009250	0.0062	glucan biosynthetic process
GO:0097305	0.00624	response to alcohol
GO:0009624	0.00645	response to nematode
GO:0009607	0.00648	response to biotic stimulus
GO:0030243	0.00667	cellulose metabolic process
GO:0016246	0.00702	RNA interference
GO:0042545	0.00718	cell wall modification
GO:0043622	0.00749	cortical microtubule organization
GO:0090376	0.00796	seed trichome differentiation
GO:0045490	0.00824	pectin catabolic process
GO:0007010	0.00885	cytoskeleton organization
GO:0048825	0.00899	cotyledon development
GO:0010025	0.00903	wax biosynthetic process
GO:0031122	0.00903	cytoplasmic microtubule organization
GO:0048826	0.00903	cotyledon morphogenesis
GO:0071365	0.00976	cellular response to auxin stimulus
GO:0009743	0.0098	response to carbohydrate

## Sheet: 7 profile age GO
REG-MAP				REVIGO
GO.ID	p-value	Description		GO.ID	log10 p-value	Description
GO:1901700	3.3e-05	response to oxygen-containing compound		GO:1901700	-4.4815	response to oxygen-containing compound
GO:0009611	0.0004	response to wounding		GO:0009611	-3.3979	response to wounding
GO:0009753	0.0004	response to jasmonic acid		GO:0009753	-3.3979	response to jasmonic acid
GO:0001101	0.00051	response to acid chemical		GO:0001101	-3.2924	response to acid chemical
GO:0009624	0.00147	response to nematode		GO:0009624	-2.8327	response to nematode
GO:0042546	0.00154	cell wall biogenesis		GO:0042546	-2.8125	cell wall biogenesis
GO:0010411	0.00203	xyloglucan metabolic process		GO:0010411	-2.6925	xyloglucan metabolic process
GO:0046688	0.00272	response to copper ion		GO:0046688	-2.5654	response to copper ion
GO:0010033	0.00332	response to organic substance		GO:0010033	-2.4789	response to organic substance
GO:0016101	0.00437	diterpenoid metabolic process		GO:0016101	-2.3595	diterpenoid metabolic process
GO:0042221	0.0056	response to chemical		GO:0042221	-2.2518	response to chemical
GO:0043207	0.00673	response to external biotic stimulus		GO:0070588	-2.0904	calcium ion transmembrane transport
GO:0051707	0.00673	response to other organism
GO:0010410	0.00769	hemicellulose metabolic process
GO:0070588	0.00812	calcium ion transmembrane transport

## Sheet: 10 profile age GO
REG-MAP				REVIGO
GO.ID	p-value	Description		GO.ID	log10 p-value	Description
GO:0015979	4.5e-21	photosynthesis		GO:0015979	-20.3468	photosynthesis
GO:0018298	8.6e-11	protein-chromophore linkage		GO:0018298	-10.0655	protein-chromophore linkage
GO:0009733	2.4e-09	response to auxin		GO:0009733	-8.6198	response to auxin
GO:0019684	3.5e-07	photosynthesis, light reaction		GO:0019684	-6.4559	photosynthesis, light reaction
GO:0009725	1.2e-06	response to hormone		GO:0009725	-5.9208	response to hormone
GO:0009719	3.7e-06	response to endogenous stimulus		GO:0009719	-5.4318	response to endogenous stimulus
GO:0006091	2.1e-05	generation of precursor metabolites and energy		GO:0006091	-4.6778	generation of precursor metabolites and energy
GO:0010033	2.4e-05	response to organic substance		GO:0010033	-4.6198	response to organic substance
GO:0009767	3.6e-05	photosynthetic electron transport chain		GO:0009767	-4.4437	photosynthetic electron transport chain
GO:0010218	3.8e-05	response to far red light		GO:0010218	-4.4202	response to far red light
GO:0042221	4.5e-05	response to chemical		GO:0042221	-4.3468	response to chemical
GO:0071258	0.00049	cellular response to gravity		GO:0071258	-3.3098	cellular response to gravity
GO:0009773	0.00055	photosynthetic electron transport in photosystem I		GO:0009773	-3.2596	photosynthetic electron transport in photosystem I
GO:0016049	0.00058	cell growth		GO:0016049	-3.2366	cell growth
GO:0009765	0.00087	photosynthesis, light harvesting		GO:0050896	-3.0605	response to stimulus
GO:0050896	0.00087	response to stimulus		GO:0009765	-3.0605	photosynthesis, light harvesting
GO:0022900	0.00091	electron transport chain		GO:0022900	-3.041	electron transport chain
GO:0009416	0.00116	response to light stimulus		GO:0009416	-2.9355	response to light stimulus
GO:0010114	0.00142	response to red light		GO:0010114	-2.8477	response to red light
GO:0042548	0.00151	regulation of photosynthesis, light reaction		GO:0042548	-2.821	regulation of photosynthesis, light reaction
GO:0009314	0.00162	response to radiation		GO:2000122	-2.7905	negative regulation of stomatal complex development
GO:0006546	0.00162	glycine catabolic process		GO:0006546	-2.7905	glycine catabolic process
GO:2000122	0.00162	negative regulation of stomatal complex development		GO:0009314	-2.7905	response to radiation
GO:0043467	0.00177	regulation of generation of precursor metabolites and energy		GO:0043467	-2.752	regulation of generation of precursor metabolites and energy
GO:0009642	0.002	response to light intensity		GO:0009642	-2.699	response to light intensity
GO:0006013	0.00241	mannose metabolic process		GO:0042549	-2.618	photosystem II stabilization
GO:0042549	0.00241	photosystem II stabilization		GO:0042873	-2.618	aldonate transport
GO:0042873	0.00241	aldonate transport		GO:0006013	-2.618	mannose metabolic process
GO:0048759	0.00241	xylem vessel member cell differentiation		GO:0048759	-2.618	xylem vessel member cell differentiation
GO:0010207	0.00274	photosystem II assembly		GO:0010207	-2.5622	photosystem II assembly
GO:0040007	0.00301	growth		GO:0040007	-2.5214	growth
GO:0009071	0.00335	serine family amino acid catabolic process		GO:0009071	-2.475	serine family amino acid catabolic process
GO:0010196	0.00335	nonphotochemical quenching		GO:0010196	-2.475	nonphotochemical quenching
GO:1990066	0.00335	energy quenching		GO:1990066	-2.475	energy quenching
GO:0009637	0.00339	response to blue light		GO:0009637	-2.4698	response to blue light
GO:0010087	0.00366	phloem or xylem histogenesis		GO:0010087	-2.4365	phloem or xylem histogenesis
GO:0010089	0.00398	xylem development		GO:0010089	-2.4001	xylem development
GO:0009639	0.00416	response to red or far red light		GO:0009639	-2.3809	response to red or far red light
GO:0015850	0.00443	organic hydroxy compound transport		GO:0015850	-2.3536	organic hydroxy compound transport
GO:0010109	0.00445	regulation of photosynthesis		GO:0010109	-2.3516	regulation of photosynthesis
GO:0009628	0.00505	response to abiotic stimulus		GO:0009628	-2.2967	response to abiotic stimulus
GO:0009644	0.00555	response to high light intensity		GO:0009644	-2.2557	response to high light intensity
GO:2000038	0.00564	regulation of stomatal complex development		GO:2000038	-2.2487	regulation of stomatal complex development
GO:0009826	0.00591	unidimensional cell growth		GO:0009826	-2.2284	unidimensional cell growth
GO:0007010	0.00619	cytoskeleton organization		GO:0007010	-2.2083	cytoskeleton organization
GO:0010205	0.00699	photoinhibition		GO:0010205	-2.1555	photoinhibition
GO:0043155	0.00699	negative regulation of photosynthesis, light reaction		GO:0043155	-2.1555	negative regulation of photosynthesis, light reaction
GO:1901264	0.00711	carbohydrate derivative transport		GO:1901264	-2.1481	carbohydrate derivative transport
GO:0010374	0.00803	stomatal complex development		GO:0010374	-2.0953	stomatal complex development
GO:0006542	0.00847	glutamine biosynthetic process		GO:0006542	-2.0721	glutamine biosynthetic process
GO:0055114	0.00962	oxidation-reduction process		GO:0055114	-2.0168	oxidation-reduction process

## Sheet: 18 profile age GO
REG-MAP				REVIGO
GO.ID	p-value	Description		GO.ID	log10 p-value	Description
GO:0042545	0.00044	cell wall modification		GO:0042545	-3.3565	cell wall modification
GO:0045490	0.00048	pectin catabolic process		GO:0045490	-3.3188	pectin catabolic process
GO:0010393	0.0011	galacturonan metabolic process		GO:0010393	-2.9586	galacturonan metabolic process
GO:0045488	0.0011	pectin metabolic process		GO:0034754	-2.451	cellular hormone metabolic process
GO:0000272	0.00146	polysaccharide catabolic process		GO:0006873	-2.383	cellular ion homeostasis
GO:0034754	0.00354	cellular hormone metabolic process		GO:0016052	-2.3261	carbohydrate catabolic process
GO:0006873	0.00414	cellular ion homeostasis		GO:0071554	-2.1024	cell wall organization or biogenesis
GO:0016052	0.00472	carbohydrate catabolic process
GO:0042446	0.00572	hormone biosynthetic process
GO:0055082	0.00781	cellular chemical homeostasis
GO:0071554	0.0079	cell wall organization or biogenesis

## Sheet: Combined GO  for Profiles 0-18 
REG-MAP				REVIGO
GO.ID	p-value	Description		GO.ID	Value	Description
GO:0071554	2.9e-14	cell wall organization or biogenesis		GO:0071554	-13.5376	cell wall organization or biogenesis
GO:0005975	3.2e-14	carbohydrate metabolic process		GO:0005975	-13.4949	carbohydrate metabolic process
GO:0042546	6.8e-13	cell wall biogenesis		GO:0042546	-12.1675	cell wall biogenesis
GO:0009834	1.9e-12	plant-type secondary cell wall biogenesis		GO:0009698	-9	phenylpropanoid metabolic process
GO:0071669	4.1e-11	plant-type cell wall organization or biogenesis		GO:0019748	-8	secondary metabolic process
GO:0009832	2.5e-10	plant-type cell wall biogenesis		GO:0015979	-7.8539	photosynthesis
GO:0009808	4.7e-10	lignin metabolic process		GO:0009607	-7.6778	response to biotic stimulus
GO:0009698	1e-09	phenylpropanoid metabolic process		GO:0005976	-7.4202	polysaccharide metabolic process
GO:0019748	1e-08	secondary metabolic process		GO:0010033	-7.3279	response to organic substance
GO:0015979	1.4e-08	photosynthesis		GO:0050896	-6.8239	response to stimulus
GO:0009607	2.1e-08	response to biotic stimulus		GO:0006952	-6.7696	defense response
GO:0005976	3.8e-08	polysaccharide metabolic process		GO:0045229	-6.3372	external encapsulating structure organization
GO:0010033	4.7e-08	response to organic substance		GO:0010025	-6.2218	wax biosynthetic process
GO:0044262	7.9e-08	cellular carbohydrate metabolic process		GO:0018298	-5.9586	protein-chromophore linkage
GO:0044264	1.1e-07	cellular polysaccharide metabolic process		GO:0009719	-5.7959	response to endogenous stimulus
GO:0050896	1.5e-07	response to stimulus		GO:0042221	-5.7696	response to chemical
GO:0006952	1.7e-07	defense response		GO:0007018	-5.4559	microtubule-based movement
GO:0071555	2.2e-07	cell wall organization		GO:0051707	-5.3098	response to other organism
GO:0045229	4.6e-07	external encapsulating structure organization		GO:0006928	-5.2676	movement of cell or subcellular component
GO:0046271	4.9e-07	phenylpropanoid catabolic process		GO:0007017	-5.2518	microtubule-based process
GO:0046274	4.9e-07	lignin catabolic process		GO:0006468	-4.9208	protein phosphorylation
GO:0010025	6e-07	wax biosynthetic process		GO:0048759	-4.8539	xylem vessel member cell differentiation
GO:0033692	8.4e-07	cellular polysaccharide biosynthetic process		GO:0009767	-4.7447	photosynthetic electron transport chain
GO:0018298	1.1e-06	protein-chromophore linkage		GO:0009987	-4.585	cellular process
GO:0010166	1.2e-06	wax metabolic process		GO:0010200	-4.2218	response to chitin
GO:0009719	1.6e-06	response to endogenous stimulus		GO:0009605	-4.1249	response to external stimulus
GO:0034637	1.6e-06	cellular carbohydrate biosynthetic process		GO:1903338	-4.0269	regulation of cell wall organization or biogenesis
GO:0042221	1.7e-06	response to chemical		GO:0042335	-3.8539	cuticle development
GO:0007018	3.5e-06	microtubule-based movement		GO:2000652	-3.6778	regulation of secondary cell wall biogenesis
GO:0009699	3.5e-06	phenylpropanoid biosynthetic process		GO:0010087	-3.6198	phloem or xylem histogenesis
GO:0030244	3.5e-06	cellulose biosynthetic process		GO:0010143	-3.6021	cutin biosynthetic process
GO:0010410	3.7e-06	hemicellulose metabolic process		GO:0009056	-3.4437	catabolic process
GO:0043207	4.9e-06	response to external biotic stimulus		GO:0006558	-3.2676	L-phenylalanine metabolic process
GO:0051707	4.9e-06	response to other organism		GO:1902221	-3.2676	erythrose 4-phosphate/phosphoenolpyruvate family amino acid metabolic process
GO:0006073	5.2e-06	cellular glucan metabolic process		GO:0002376	-2.9318	immune system process
GO:0044042	5.2e-06	glucan metabolic process		GO:0006629	-2.9066	lipid metabolic process
GO:0006928	5.4e-06	movement of cell or subcellular component		GO:0010229	-2.7905	inflorescence development
GO:0051274	5.4e-06	beta-glucan biosynthetic process		GO:0015850	-2.7352	organic hydroxy compound transport
GO:0044036	5.6e-06	cell wall macromolecule metabolic process		GO:0010232	-2.7352	vascular transport
GO:0000271	5.6e-06	polysaccharide biosynthetic process		GO:0007154	-2.699	cell communication
GO:0007017	5.6e-06	microtubule-based process		GO:0009058	-2.6402	biosynthetic process
GO:1901700	1.2e-05	response to oxygen-containing compound		GO:0002252	-2.5331	immune effector process
GO:0006468	1.2e-05	protein phosphorylation		GO:0042744	-2.5229	hydrogen peroxide catabolic process
GO:0048759	1.4e-05	xylem vessel member cell differentiation		GO:0009072	-2.3546	aromatic amino acid family metabolic process
GO:0009767	1.8e-05	photosynthetic electron transport chain		GO:0044087	-2.3325	regulation of cellular component biogenesis
GO:0044763	2.6e-05	single-organism cellular process		GO:1900055	-2.3107	regulation of leaf senescence
GO:0009627	3.7e-05	systemic acquired resistance		GO:0023052	-2.2676	signaling
GO:0010383	4.7e-05	cell wall polysaccharide metabolic process		GO:1901430	-2.2343	positive regulation of syringal lignin biosynthetic process
GO:0009250	5e-05	glucan biosynthetic process		GO:0080165	-2.2343	callose deposition in phloem sieve plate
GO:0044550	5.6e-05	secondary metabolite biosynthetic process		GO:0046244	-2.2343	salicylic acid catabolic process
GO:0016051	5.7e-05	carbohydrate biosynthetic process		GO:0010045	-2.2343	response to nickel cation
GO:0010200	6e-05	response to chitin		GO:0010112	-2.1415	regulation of systemic acquired resistance
GO:0045491	6.5e-05	xylan metabolic process		GO:0042873	-2.1278	aldonate transmembrane transport
GO:0019684	6.7e-05	photosynthesis, light reaction		GO:0015749	-2.1278	monosaccharide transmembrane transport
GO:0009725	7.4e-05	response to hormone		GO:0072593	-2.1002	reactive oxygen species metabolic process
GO:0009605	7.5e-05	response to external stimulus		GO:0042537	-2.098	benzene-containing compound metabolic process
GO:0009809	8.1e-05	lignin biosynthetic process		GO:0009628	-2.0106	response to abiotic stimulus
GO:0051273	8.8e-05	beta-glucan metabolic process		GO:0055114	-2.0066	(obsolete) oxidation-reduction process
GO:0030243	9.3e-05	cellulose metabolic process
GO:1903338	9.4e-05	regulation of cell wall organization or biogenesis
GO:0006950	0.00013	response to stress
GO:0042335	0.00014	cuticle development
GO:0009733	0.00015	response to auxin
GO:0009800	0.00016	cinnamic acid biosynthetic process
GO:0009803	0.00016	cinnamic acid metabolic process
GO:0010088	0.00016	phloem development
GO:2000652	0.00021	regulation of secondary cell wall biogenesis
GO:0098542	0.00024	defense response to other organism
GO:0010087	0.00024	phloem or xylem histogenesis
GO:0010143	0.00025	cutin biosynthetic process
GO:0045492	0.00027	xylan biosynthetic process
GO:0044723	0.00029	single-organism carbohydrate metabolic process
GO:0010243	0.00031	response to organonitrogen compound
GO:0044712	0.00036	single-organism catabolic process
GO:0006558	0.00054	L-phenylalanine metabolic process
GO:1902221	0.00054	erythrose 4-phosphate/phosphoenolpyruvate family amino acid metabolic process
GO:0002376	0.00117	immune system process
GO:0006629	0.00124	lipid metabolic process
GO:0001101	0.00134	response to acid chemical
GO:0010229	0.00162	inflorescence development
GO:0048281	0.00168	inflorescence morphogenesis
GO:0009664	0.00171	plant-type cell wall organization
GO:0006559	0.00184	L-phenylalanine catabolic process
GO:0010232	0.00184	vascular transport
GO:0010233	0.00184	phloem transport
GO:0015850	0.00184	organic hydroxy compound transport
GO:1902222	0.00184	erythrose 4-phosphate/phosphoenolpyruvate family amino acid catabolic process
GO:0016310	0.00189	phosphorylation
GO:0009773	0.00197	photosynthetic electron transport in photosystem I
GO:0007154	0.002	cell communication
GO:0010089	0.00211	xylem development
GO:0042743	0.00221	hydrogen peroxide metabolic process
GO:0044711	0.00229	single-organism biosynthetic process
GO:0009620	0.00253	response to fungus
GO:0014070	0.00253	response to organic cyclic compound
GO:1901698	0.00273	response to nitrogen compound
GO:0002252	0.00293	immune effector process
GO:0042744	0.003	hydrogen peroxide catabolic process
GO:0009617	0.00311	response to bacterium
GO:0007010	0.00355	cytoskeleton organization
GO:0009888	0.00385	tissue development
GO:0010067	0.00395	procambium histogenesis
GO:0009611	0.00397	response to wounding
GO:0042742	0.00439	defense response to bacterium
GO:0009072	0.00442	aromatic amino acid family metabolic process
GO:0009624	0.00453	response to nematode
GO:0097305	0.00459	response to alcohol
GO:0007165	0.00462	signal transduction
GO:0044087	0.00465	regulation of cellular component biogenesis
GO:0072330	0.00468	monocarboxylic acid biosynthetic process
GO:0009862	0.00489	systemic acquired resistance, salicylic acid mediated signaling pathway
GO:1900055	0.00489	regulation of leaf senescence
GO:0090376	0.00523	seed trichome differentiation
GO:0009741	0.00537	response to brassinosteroid
GO:0044700	0.0054	single organism signaling
GO:0006464	0.00546	cellular protein modification process
GO:0036211	0.00546	protein modification process
GO:0023052	0.00555	signaling
GO:0010045	0.00583	response to nickel cation
GO:0046244	0.00583	salicylic acid catabolic process
GO:0071289	0.00583	cellular response to nickel ion
GO:0080165	0.00583	callose deposition in phloem sieve plate
GO:1901064	0.00583	syringal lignin metabolic process
GO:1901066	0.00583	syringal lignin biosynthetic process
GO:1901428	0.00583	regulation of syringal lignin biosynthetic process
GO:1901430	0.00583	positive regulation of syringal lignin biosynthetic process
GO:0044038	0.00593	cell wall macromolecule biosynthetic process
GO:0070589	0.00593	cellular component macromolecule biosynthetic process
GO:0070592	0.00593	cell wall polysaccharide biosynthetic process
GO:0009814	0.00651	defense response, incompatible interaction
GO:0042545	0.00714	cell wall modification
GO:0016053	0.0072	organic acid biosynthetic process
GO:0046394	0.0072	carboxylic acid biosynthetic process
GO:0009095	0.00722	aromatic amino acid family biosynthetic process, prephenate pathway
GO:0010112	0.00722	regulation of systemic acquired resistance
GO:0048869	0.00726	cellular developmental process
GO:0010065	0.00745	primary meristem tissue development
GO:0015749	0.00745	monosaccharide transport
GO:0042873	0.00745	aldonate transport
GO:0072593	0.00794	reactive oxygen species metabolic process
GO:0042537	0.00798	benzene-containing compound metabolic process
GO:0033993	0.00815	response to lipid
GO:0009753	0.00891	response to jasmonic acid
GO:0022900	0.00891	electron transport chain
GO:0045490	0.00892	pectin catabolic process
GO:0010374	0.00922	stomatal complex development
GO:0051701	0.00922	interaction with host
GO:0010411	0.00956	xyloglucan metabolic process
GO:0009628	0.00976	response to abiotic stimulus
GO:0009772	0.00983	photosynthetic electron transport in photosystem II
GO:0051817	0.00983	modification of morphology or physiology of other organism involved in symbiotic interaction
GO:0055114	0.00985	oxidation-reduction process

## Sheet: 31 profile age GO
REG-MAP				REVIGO
GO.ID	p-value	Description		GO.ID	log10 p-value	Description
GO:0009605	1.1e-06	response to external stimulus		GO:0009605	-5.9586	response to external stimulus
GO:0055114	1.9e-05	oxidation-reduction process		GO:0055114	-4.7212	oxidation-reduction process
GO:0031669	3.1e-05	cellular response to nutrient levels		GO:0031669	-4.5086	cellular response to nutrient levels
GO:0015698	4.1e-05	inorganic anion transport		GO:0015698	-4.3872	inorganic anion transport
GO:1901565	5.3e-05	organonitrogen compound catabolic process		GO:1901565	-4.2757	organonitrogen compound catabolic process
GO:0031668	9.9e-05	cellular response to extracellular stimulus		GO:0071496	-3.9208	cellular response to external stimulus
GO:0071496	0.00012	cellular response to external stimulus		GO:0071705	-3.8239	nitrogen compound transport
GO:0031667	0.00013	response to nutrient levels		GO:0035445	-3.6383	borate transmembrane transport
GO:0071705	0.00015	nitrogen compound transport		GO:0042886	-3.4815	amide transport
GO:0043207	0.00019	response to external biotic stimulus		GO:0009607	-3.2147	response to biotic stimulus
GO:0051707	0.00019	response to other organism		GO:0019439	-3.2076	aromatic compound catabolic process
GO:0035445	0.00023	borate transmembrane transport		GO:0046713	-3.1675	borate transport
GO:0042886	0.00033	amide transport		GO:1901361	-3.0969	organic cyclic compound catabolic process
GO:0009991	0.00035	response to extracellular stimulus		GO:0015706	-2.9547	nitrate transport
GO:0044712	0.00043	single-organism catabolic process		GO:0010231	-2.8697	maintenance of seed dormancy
GO:0009607	0.00061	response to biotic stimulus		GO:0006787	-2.6968	porphyrin-containing compound catabolic process
GO:0019439	0.00062	aromatic compound catabolic process		GO:0033015	-2.6968	tetrapyrrole catabolic process
GO:0046713	0.00068	borate transport		GO:0042440	-2.684	pigment metabolic process
GO:1901361	0.0008	organic cyclic compound catabolic process		GO:0010036	-2.6517	response to boron-containing substance
GO:0015706	0.00111	nitrate transport		GO:0080029	-2.6517	cellular response to boron-containing substance levels
GO:0043562	0.00111	cellular response to nitrogen levels		GO:0006810	-2.6478	transport
GO:0010231	0.00135	maintenance of seed dormancy		GO:0009753	-2.6421	response to jasmonic acid
GO:0097437	0.00135	maintenance of dormancy		GO:0051187	-2.6234	cofactor catabolic process
GO:0044248	0.00169	cellular catabolic process		GO:0051179	-2.5935	localization
GO:0006787	0.00201	porphyrin-containing compound catabolic process		GO:0006820	-2.475	anion transport
GO:0033015	0.00201	tetrapyrrole catabolic process		GO:0044242	-2.4318	cellular lipid catabolic process
GO:0042440	0.00207	pigment metabolic process		GO:0044710	-2.3969	single-organism metabolic process
GO:0010036	0.00223	response to boron-containing substance		GO:0009624	-2.3947	response to nematode
GO:0080029	0.00223	cellular response to boron-containing substance levels		GO:0019374	-2.2182	galactolipid metabolic process
GO:0006810	0.00225	transport		GO:0018958	-2.1118	phenol-containing compound metabolic process
GO:0009753	0.00228	response to jasmonic acid		GO:0046283	-2.1118	anthocyanin-containing compound metabolic process
GO:0051187	0.00238	cofactor catabolic process		GO:0009690	-2.0675	cytokinin metabolic process
GO:0051179	0.00255	localization		GO:0009812	-2.0429	flavonoid metabolic process
GO:0051234	0.00262	establishment of localization		GO:0009611	-2.0155	response to wounding
GO:0006820	0.00335	anion transport
GO:0009620	0.00346	response to fungus
GO:0050832	0.0035	defense response to fungus
GO:0044242	0.0037	cellular lipid catabolic process
GO:0044710	0.00401	single-organism metabolic process
GO:0009624	0.00403	response to nematode
GO:0016036	0.00438	cellular response to phosphate starvation
GO:0009267	0.00448	cellular response to starvation
GO:0009814	0.00558	defense response, incompatible interaction
GO:0016054	0.00598	organic acid catabolic process
GO:0046395	0.00598	carboxylic acid catabolic process
GO:0006995	0.00605	cellular response to nitrogen starvation
GO:0019374	0.00605	galactolipid metabolic process
GO:0044282	0.00638	small molecule catabolic process
GO:0042594	0.00703	response to starvation
GO:0018958	0.00773	phenol-containing compound metabolic process
GO:0046283	0.00773	anthocyanin-containing compound metabolic process
GO:0009690	0.00856	cytokinin metabolic process
GO:0098542	0.00874	defense response to other organism
GO:0009812	0.00906	flavonoid metabolic process
GO:0009611	0.00965	response to wounding

## Sheet: 34 profile age GO
REG-MAP				REVIGO
GO.ID	p-value	Description		GO.ID	log10 p-value	Description
GO:1901566	5.7e-25	organonitrogen compound biosynthetic process		GO:1901566	-24.2441	organonitrogen compound biosynthetic process
GO:1901564	4.9e-22	organonitrogen compound metabolic process		GO:1901564	-21.3098	organonitrogen compound metabolic process
GO:0006412	1.3e-18	translation		GO:0006412	-17.8861	translation
GO:0043043	1.8e-18	peptide biosynthetic process		GO:0043603	-16.2076	cellular amide metabolic process
GO:0006518	3.7e-18	peptide metabolic process		GO:0009657	-14.8239	plastid organization
GO:0043604	1e-17	amide biosynthetic process		GO:0044271	-14.7212	cellular nitrogen compound biosynthetic process
GO:0043603	6.2e-17	cellular amide metabolic process		GO:0044249	-12.9586	cellular biosynthetic process
GO:0009657	1.5e-15	plastid organization		GO:0034641	-12.7959	cellular nitrogen compound metabolic process
GO:0044271	1.9e-15	cellular nitrogen compound biosynthetic process		GO:1901576	-12.2518	organic substance biosynthetic process
GO:0044249	1.1e-13	cellular biosynthetic process		GO:0009058	-12.1249	biosynthetic process
GO:0034641	1.6e-13	cellular nitrogen compound metabolic process		GO:0006807	-12.0655	nitrogen compound metabolic process
GO:1901576	5.6e-13	organic substance biosynthetic process		GO:0009658	-11.0132	chloroplast organization
GO:0009058	7.5e-13	biosynthetic process		GO:0033014	-10.2291	tetrapyrrole biosynthetic process
GO:0006807	8.6e-13	nitrogen compound metabolic process		GO:0010467	-9.6383	gene expression
GO:0009658	9.7e-12	chloroplast organization		GO:0033013	-8.8539	tetrapyrrole metabolic process
GO:0033014	5.9e-11	tetrapyrrole biosynthetic process		GO:0044237	-7.5376	cellular metabolic process
GO:0010467	2.3e-10	gene expression		GO:0034645	-7.3565	cellular macromolecule biosynthetic process
GO:0006779	3.9e-10	porphyrin-containing compound biosynthetic process		GO:0009059	-7.041	macromolecule biosynthetic process
GO:0033013	1.4e-09	tetrapyrrole metabolic process		GO:0071704	-6.9586	organic substance metabolic process
GO:0006778	1.3e-08	porphyrin-containing compound metabolic process		GO:0051188	-6.7696	cofactor biosynthetic process
GO:0044237	2.9e-08	cellular metabolic process		GO:0008152	-6.5086	metabolic process
GO:0034645	4.4e-08	cellular macromolecule biosynthetic process		GO:0051186	-6.4949	cofactor metabolic process
GO:0009059	9.1e-08	macromolecule biosynthetic process		GO:0010035	-6.2147	response to inorganic substance
GO:0071704	1.1e-07	organic substance metabolic process		GO:1990748	-5.8539	cellular detoxification
GO:0015995	1.5e-07	chlorophyll biosynthetic process		GO:0044267	-5.3565	cellular protein metabolic process
GO:0051188	1.7e-07	cofactor biosynthetic process		GO:0019538	-5.3372	protein metabolic process
GO:0008152	3.1e-07	metabolic process		GO:0006996	-5.1487	organelle organization
GO:0051186	3.2e-07	cofactor metabolic process		GO:0006457	-5.1249	protein folding
GO:0010035	6.1e-07	response to inorganic substance		GO:0042026	-4.7212	protein refolding
GO:0019430	1.4e-06	removal of superoxide radicals		GO:0000302	-4.7212	response to reactive oxygen species
GO:0071450	1.4e-06	cellular response to oxygen radical		GO:0044238	-4.6778	primary metabolic process
GO:0071451	1.4e-06	cellular response to superoxide		GO:0044711	-4.6383	single-organism biosynthetic process
GO:1990748	1.4e-06	cellular detoxification		GO:0009735	-4.4318	response to cytokinin
GO:0032544	2.1e-06	plastid translation		GO:0043170	-4.3979	macromolecule metabolic process
GO:0000303	3e-06	response to superoxide		GO:0042440	-4.2676	pigment metabolic process
GO:0000305	3e-06	response to oxygen radical		GO:1900409	-4.1675	positive regulation of cellular response to oxidative stress
GO:0015994	3.8e-06	chlorophyll metabolic process		GO:0009987	-4.1549	cellular process
GO:0044267	4.4e-06	cellular protein metabolic process		GO:0044260	-4.1079	cellular macromolecule metabolic process
GO:0019538	4.6e-06	protein metabolic process		GO:0034660	-4.0269	ncRNA metabolic process
GO:0006801	5.7e-06	superoxide metabolic process		GO:1903725	-3.699	regulation of phospholipid metabolic process
GO:0098754	5.7e-06	detoxification		GO:0071457	-3.699	cellular response to ozone
GO:0006996	7.1e-06	organelle organization		GO:0010322	-3.699	regulation of isopentenyl diphosphate biosynthetic process, methylerythritol 4-phosphate pathway
GO:0006457	7.5e-06	protein folding		GO:0042221	-3.6383	response to chemical
GO:0046148	9.7e-06	pigment biosynthetic process		GO:0071840	-3.4949	cellular component organization or biogenesis
GO:0042026	1.9e-05	protein refolding		GO:0046686	-3.4559	response to cadmium ion
GO:0000302	1.9e-05	response to reactive oxygen species		GO:0006090	-3.4089	pyruvate metabolic process
GO:0044238	2.1e-05	primary metabolic process		GO:0051353	-3.3979	positive regulation of oxidoreductase activity
GO:0044711	2.3e-05	single-organism biosynthetic process		GO:0043572	-3.3872	plastid fission
GO:0009735	3.7e-05	response to cytokinin		GO:0010193	-3.3098	response to ozone
GO:0043170	4e-05	macromolecule metabolic process		GO:0006399	-3.1805	tRNA metabolic process
GO:0042440	5.4e-05	pigment metabolic process		GO:0090322	-3.1739	regulation of superoxide metabolic process
GO:1900409	6.8e-05	positive regulation of cellular response to oxidative stress		GO:0071493	-3.1739	cellular response to UV-B
GO:1901033	6.8e-05	positive regulation of response to reactive oxygen species		GO:1902882	-3.1739	regulation of response to oxidative stress
GO:1901668	6.8e-05	regulation of superoxide dismutase activity		GO:0009451	-2.8665	RNA modification
GO:1901671	6.8e-05	positive regulation of superoxide dismutase activity		GO:0051341	-2.857	regulation of oxidoreductase activity
GO:0009636	6.8e-05	response to toxic substance		GO:0019288	-2.7352	isopentenyl diphosphate biosynthetic process, methylerythritol 4-phosphate pathway
GO:0009987	7e-05	cellular process		GO:0006165	-2.7122	nucleoside diphosphate phosphorylation
GO:0044260	7.8e-05	cellular macromolecule metabolic process		GO:0019216	-2.6778	regulation of lipid metabolic process
GO:0034660	9.4e-05	ncRNA metabolic process		GO:0031167	-2.6289	rRNA methylation
GO:0010038	0.00012	response to metal ion		GO:0044281	-2.6271	small molecule metabolic process
GO:0034614	0.00014	cellular response to reactive oxygen species		GO:0006091	-2.5935	generation of precursor metabolites and energy
GO:0010322	0.0002	regulation of isopentenyl diphosphate biosynthetic process, methylerythritol 4-phosphate pathway		GO:0009266	-2.5884	response to temperature stimulus
GO:0071071	0.0002	regulation of phospholipid biosynthetic process		GO:0019684	-2.5391	photosynthesis, light reaction
GO:0071457	0.0002	cellular response to ozone		GO:0046490	-2.5331	isopentenyl diphosphate metabolic process
GO:1900407	0.0002	regulation of cellular response to oxidative stress		GO:0043038	-2.4815	amino acid activation
GO:1901031	0.0002	regulation of response to reactive oxygen species		GO:0009132	-2.4815	nucleoside diphosphate metabolic process
GO:1903725	0.0002	regulation of phospholipid metabolic process		GO:0034622	-2.451	cellular macromolecular complex assembly
GO:2000121	0.0002	regulation of removal of superoxide radicals		GO:0006396	-2.4486	RNA processing
GO:0042221	0.00023	response to chemical		GO:0010565	-2.4225	regulation of cellular ketone metabolic process
GO:0034599	0.0003	cellular response to oxidative stress		GO:0015979	-2.4214	photosynthesis
GO:0071840	0.00032	cellular component organization or biogenesis		GO:0046939	-2.399	nucleotide phosphorylation
GO:0010020	0.00035	chloroplast fission		GO:0032787	-2.384	monocarboxylic acid metabolic process
GO:0046686	0.00035	response to cadmium ion		GO:0046483	-2.383	heterocycle metabolic process
GO:0016043	0.00036	cellular component organization		GO:0031425	-2.3716	chloroplast RNA processing
GO:0006090	0.00039	pyruvate metabolic process		GO:0042180	-2.3215	cellular ketone metabolic process
GO:0051353	0.0004	positive regulation of oxidoreductase activity		GO:0006082	-2.2725	organic acid metabolic process
GO:1902884	0.0004	positive regulation of response to oxidative stress		GO:0016036	-2.2418	cellular response to phosphate starvation
GO:0043572	0.00041	plastid fission		GO:0006725	-2.2269	cellular aromatic compound metabolic process
GO:0010193	0.00049	response to ozone		GO:0072528	-2.2147	pyrimidine-containing compound biosynthetic process
GO:0006399	0.00066	tRNA metabolic process		GO:1901360	-2.1146	organic cyclic compound metabolic process
GO:0071493	0.00067	cellular response to UV-B		GO:0009628	-2.0862	response to abiotic stimulus
GO:0090322	0.00067	regulation of superoxide metabolic process		GO:0045037	-2.0696	protein import into chloroplast stroma
GO:1902882	0.00067	regulation of response to oxidative stress		GO:0019637	-2.0675	organophosphate metabolic process
GO:0034470	0.00081	ncRNA processing		GO:0044710	-2.0177	single-organism metabolic process
GO:2000379	0.001	positive regulation of reactive oxygen species metabolic process		GO:0006979	-2.0079	response to oxidative stress
GO:0009451	0.00136	RNA modification
GO:0051341	0.00139	regulation of oxidoreductase activity
GO:0009668	0.00173	plastid membrane organization
GO:0010027	0.00173	thylakoid membrane organization
GO:0019288	0.00184	isopentenyl diphosphate biosynthetic process, methylerythritol 4-phosphate pathway
GO:0006165	0.00194	nucleoside diphosphate phosphorylation
GO:0019216	0.0021	regulation of lipid metabolic process
GO:0031167	0.00235	rRNA methylation
GO:0071484	0.00235	cellular response to light intensity
GO:0044281	0.00236	small molecule metabolic process
GO:0006091	0.00255	generation of precursor metabolites and energy
GO:0071482	0.00256	cellular response to light stimulus
GO:0009266	0.00258	response to temperature stimulus
GO:0019684	0.00289	photosynthesis, light reaction
GO:0009240	0.00293	isopentenyl diphosphate biosynthetic process
GO:0046490	0.00293	isopentenyl diphosphate metabolic process
GO:0071478	0.00315	cellular response to radiation
GO:0009132	0.0033	nucleoside diphosphate metabolic process
GO:0043038	0.0033	amino acid activation
GO:0043039	0.0033	tRNA aminoacylation
GO:0034622	0.00354	cellular macromolecular complex assembly
GO:0000154	0.00356	rRNA modification
GO:0034644	0.00356	cellular response to UV
GO:0006396	0.00356	RNA processing
GO:0010565	0.00378	regulation of cellular ketone metabolic process
GO:0015979	0.00379	photosynthesis
GO:0046939	0.00399	nucleotide phosphorylation
GO:0019752	0.00413	carboxylic acid metabolic process
GO:0032787	0.00413	monocarboxylic acid metabolic process
GO:0046483	0.00414	heterocycle metabolic process
GO:0031425	0.00425	chloroplast RNA processing
GO:0042180	0.00477	cellular ketone metabolic process
GO:0019747	0.00499	regulation of isoprenoid metabolic process
GO:0043436	0.00523	oxoacid metabolic process
GO:0006082	0.00534	organic acid metabolic process
GO:0001510	0.00573	RNA methylation
GO:0016036	0.00573	cellular response to phosphate starvation
GO:0019856	0.00579	pyrimidine nucleobase biosynthetic process
GO:0006725	0.00593	cellular aromatic compound metabolic process
GO:0072528	0.0061	pyrimidine-containing compound biosynthetic process
GO:1901360	0.00768	organic cyclic compound metabolic process
GO:0046496	0.008	nicotinamide nucleotide metabolic process
GO:0009628	0.0082	response to abiotic stimulus
GO:0019362	0.0083	pyridine nucleotide metabolic process
GO:0065003	0.00833	macromolecular complex assembly
GO:0006206	0.00852	pyrimidine nucleobase metabolic process
GO:0009218	0.00852	pyrimidine ribonucleotide metabolic process
GO:0009220	0.00852	pyrimidine ribonucleotide biosynthetic process
GO:0045037	0.00852	protein import into chloroplast stroma
GO:0046132	0.00852	pyrimidine ribonucleoside biosynthetic process
GO:0046134	0.00852	pyrimidine nucleoside biosynthetic process
GO:0019637	0.00856	organophosphate metabolic process
GO:0044710	0.0096	single-organism metabolic process
GO:0006979	0.00982	response to oxidative stress

## Sheet: 35 profile age GO
REG-MAP				REVIGO
GO.ID	p-value	Description		GO.ID	log10 p-value	Description
GO:0055114	5.9e-06	oxidation-reduction process		GO:0055114	-5.2291	oxidation-reduction process
GO:0035337	0.00032	fatty-acyl-CoA metabolic process		GO:0035337	-3.4949	fatty-acyl-CoA metabolic process
GO:1900992	0.00032	(-)-secologanin metabolic process		GO:1901806	-3.4949	beta-glucoside biosynthetic process
GO:1900994	0.00032	(-)-secologanin biosynthetic process		GO:0016098	-3.0223	monoterpenoid metabolic process
GO:1901806	0.00032	beta-glucoside biosynthetic process		GO:0016099	-3.0223	monoterpenoid biosynthetic process
GO:0016098	0.00095	monoterpenoid metabolic process		GO:0098609	-2.7258	cell-cell adhesion
GO:0016099	0.00095	monoterpenoid biosynthetic process		GO:0016137	-2.7258	glycoside metabolic process
GO:0016138	0.00095	glycoside biosynthetic process		GO:0006355	-2.426	regulation of transcription, DNA-templated
GO:1901804	0.00095	beta-glucoside metabolic process		GO:0008299	-2.1361	isoprenoid biosynthetic process
GO:0016137	0.00188	glycoside metabolic process		GO:0009065	-2.0773	glutamine family amino acid catabolic process
GO:0098609	0.00188	cell-cell adhesion		GO:0009688	-2.0773	abscisic acid biosynthetic process
GO:0010468	0.00299	regulation of gene expression
GO:0051252	0.00338	regulation of RNA metabolic process
GO:0006355	0.00375	regulation of transcription, DNA-templated
GO:1903506	0.00422	regulation of nucleic acid-templated transcription
GO:2001141	0.00422	regulation of RNA biosynthetic process
GO:0016114	0.00473	terpenoid biosynthetic process
GO:0060255	0.00514	regulation of macromolecule metabolic process
GO:0019219	0.00567	regulation of nucleobase-containing compound metabolic process
GO:0006351	0.00703	transcription, DNA-templated
GO:0008299	0.00731	isoprenoid biosynthetic process
GO:2000112	0.00804	regulation of cellular macromolecule biosynthetic process
GO:0009065	0.00837	glutamine family amino acid catabolic process
GO:0009688	0.00837	abscisic acid biosynthetic process
GO:0043289	0.00837	apocarotenoid biosynthetic process
GO:1902645	0.00837	tertiary alcohol biosynthetic process
GO:0097659	0.00843	nucleic acid-templated transcription
GO:0031326	0.00873	regulation of cellular biosynthetic process
GO:0010556	0.00921	regulation of macromolecule biosynthetic process
GO:0009889	0.00996	regulation of biosynthetic process

## Sheet: 38 profile age GO
REG-MAP				REVIGO
GO.ID	p-value	Description		GO.ID	log10 p-value	Description
GO:0080167	0.00044	response to karrikin		GO:0080167	-3.3565	response to karrikin
GO:0006636	0.00051	unsaturated fatty acid biosynthetic process		GO:0033559	-3.2924	unsaturated fatty acid metabolic process
GO:0033559	0.00051	unsaturated fatty acid metabolic process		GO:0006636	-3.2924	unsaturated fatty acid biosynthetic process
GO:0010466	0.00127	negative regulation of peptidase activity		GO:0030162	-2.6696	regulation of proteolysis
GO:0010951	0.00127	negative regulation of endopeptidase activity		GO:0016567	-2.6198	protein ubiquitination
GO:0052547	0.00127	regulation of peptidase activity		GO:0006526	-2.5638	arginine biosynthetic process
GO:0052548	0.00127	regulation of endopeptidase activity		GO:0031323	-2.5361	regulation of cellular metabolic process
GO:0051346	0.00132	negative regulation of hydrolase activity		GO:0046394	-2.4855	carboxylic acid biosynthetic process
GO:0045861	0.00173	negative regulation of proteolysis		GO:0052547		regulation of peptidase activity
GO:0030162	0.00214	regulation of proteolysis
GO:0016567	0.0024	protein ubiquitination
GO:0006526	0.00273	arginine biosynthetic process
GO:0031323	0.00291	regulation of cellular metabolic process
GO:0016053	0.00327	organic acid biosynthetic process
GO:0046394	0.00327	carboxylic acid biosynthetic process
GO:0032446	0.00343	protein modification by small protein conjugation
GO:0080090	0.00412	regulation of primary metabolic process
GO:0032269	0.0043	negative regulation of cellular protein metabolic process
GO:0051248	0.00443	negative regulation of protein metabolic process
GO:0006525	0.00511	arginine metabolic process
GO:0060255	0.00637	regulation of macromolecule metabolic process

[truncated: 3 more sheets: 39 profile age GO, Combined GO for Profile 31-39, STEM profiles Log2FoldChange]
