# Supplementary material for: Transcriptional Programs and Regulators Underlying Age-Dependent and Dark-Induced Senescence in Medicago truncatula
Source: Cells. 2022 May 6;11(9):1570. doi: 10.3390/cells11091570 (PMC9103780; doi:10.3390/cells11091570)
Supplement: Supplementary file 1 [file cells-11-01570-s001.zip › Supplementary Dataset S5. Log2 Fold changes values of DE genes during dark-induced senescence.xlsx]

## Sheet: 1dd.0dd
Gene ID	log2FoldChange	lfcSE	stat	pvalue	padj	Gene description	Arabidopsis hit description	Annotation
Medtr2g087900	10.2273	1.18783	8.61004	7.30374e-18	5.79974e-17	PF03552(Cellulose synthase)	AT2G32530	cellulose synthase-like B3
Medtr2g045280	9.51086	0.671278	14.1683	1.43976e-45	3.58548e-44	PF00383(Cytidine and deoxycytidylate deaminase zinc-binding region)	AT5G28050	Cytidine/deoxycytidylate deaminase family protein
Medtr2g101660	9.33969	1.03826	8.99552	2.35123e-19	2.0185e-18	PF04749(PLAC8 family)	AT1G52200	PLAC8 family protein
Medtr8g015220	9.28554	0.52725	17.6113	2.01856e-69	9.69529e-68	PF05153(Myo-inositol oxygenase)	AT1G14520	myo-inositol oxygenase 1
Medtr1g110550	9.02791	0.39097	23.091	5.69721e-118	7.92661e-116		AT1G25400
Medtr8g091290	8.89926	1.27785	6.96424	3.30185e-12	1.85639e-11	PF00929(Exonuclease)	AT4G39810	Polynucleotidyl transferase, ribonuclease H-like superfamily protein
Medtr8g447340	8.73306	1.24654	7.00586	2.45468e-12	1.38958e-11	PF00083(Sugar (and other) transporter)	AT1G16390	organic cation/carnitine transporter 3
Medtr3g103580	8.68954	0.509147	17.0669	2.61863e-65	1.12632e-63	PF01063(Amino-transferase class IV)	AT1G10070	branched-chain amino acid transaminase 2
Medtr7g066690	8.68035	0.384246	22.5906	5.361e-113	6.81859e-111	PF00153(Mitochondrial carrier protein)	AT3G54110	plant uncoupling mitochondrial protein 1
Medtr2g008030	8.4603	0.565256	14.9672	1.20274e-50	3.48417e-49	PF00316(Fructose-1-6-bisphosphatase)	AT1G43670	Inositol monophosphatase family protein
Medtr6g059530	8.3249	0.550801	15.1142	1.30591e-51	3.86621e-50	PF00197(Trypsin and protease inhibitor)	AT1G73260	kunitz trypsin inhibitor 1
Medtr4g088760	8.27547	0.56903	14.5431	6.45896e-48	1.74645e-46	PF04720(PDDEXK-like family of unknown function)	AT4G32480	Protein of unknown function (DUF506)
Medtr4g066210	8.24143	0.80338	10.2584	1.08442e-24	1.21042e-23	PF00232(Glycosyl hydrolase family 1)	AT2G44480	beta glucosidase 17
Medtr2g055790	8.20479	0.386154	21.2474	3.48128e-100	3.49721e-98	PF00097(Zinc finger, C3HC4 type (RING finger))	AT3G05200	RING/U-box superfamily protein
Medtr4g011020	8.18111	0.447495	18.282	1.15059e-74	6.38533e-73	PF00903(Glyoxalase/Bleomycin resistance protein/Dioxygenase superfamily)	AT1G80160	Lactoylglutathione lyase / glyoxalase I family protein
Medtr7g052300	8.00685	1.24168	6.44839	1.13047e-10	5.66189e-10		AT3G56500	serine-rich protein-related
Medtr5g017670	7.99827	0.4294	18.6266	1.95571e-77	1.1638e-75	PF01734(Patatin-like phospholipase)	AT4G37070	Acyl transferase/acyl hydrolase/lysophospholipase superfamily protein
Medtr6g016650	7.94307	0.572786	13.8674	9.98082e-44	2.33819e-42	PF01619(Proline dehydrogenase)	AT3G30775	Methylenetetrahydrofolate reductase family protein
Medtr2g029750	7.8872	1.23755	6.37323	1.85084e-10	9.11728e-10	PF00141(Peroxidase)	AT2G38380	Peroxidase superfamily protein
Medtr4g084480	7.87971	0.910909	8.65038	5.13299e-18	4.11125e-17	PF00332(Glycosyl hydrolases family 17)	AT4G18340	Glycosyl hydrolase superfamily protein
Medtr5g033520	7.84569	1.27717	6.14302	8.09659e-10	3.8068e-09	PF04864(Allinase)	AT1G70560	tryptophan aminotransferase of Arabidopsis 1
Medtr1g073780	7.8121	1.2446	6.2768	3.45611e-10	1.66729e-09		AT1G06137
Medtr1g077520	7.77772	1.07667	7.22387	5.05287e-13	2.97934e-12	PF02065(Melibiase)	AT5G08370	alpha-galactosidase 2
Medtr5g073200	7.77077	2.0276	3.8325	0.000126849	0.000364437	PF03936(Terpene synthase family, metal binding domain), PF01397(Terpene synthase, N-terminal domain)	AT5G23960	terpene synthase 21
Medtr7g024750	7.75187	0.919037	8.43477	3.31862e-17	2.53538e-16	PF04535(Domain of unknown function (DUF588))	AT2G39530	Uncharacterised protein family (UPF0497)
Medtr3g118160	7.71207	1.2233	6.30433	2.89436e-10	1.40429e-09	PF10424()	AT5G27740	ATPase family associated with various cellular activities (AAA)
Medtr8g067275	7.70872	1.28046	6.02029	1.74102e-09	7.97081e-09	PF01293(Phosphoenolpyruvate carboxykinase)	AT4G37870	phosphoenolpyruvate carboxykinase 1
Medtr5g090250	7.68761	0.686138	11.2042	3.88898e-29	5.30128e-28	PF00280(Potato inhibitor I family)	AT2G38870	Serine protease inhibitor, potato inhibitor I-type family protein
Medtr5g019120	7.66946	0.299915	25.5721	3.11693e-144	7.21643e-142	PF04193(PQ loop repeat )	AT4G36850	PQ-loop repeat family protein / transmembrane family protein
Medtr2g024010	7.62956	0.91413	8.34625	7.0464e-17	5.27857e-16	PF04885(Stigma-specific protein, Stig1)	AT1G11925	Stigma-specific Stig1 family protein
Medtr7g082570	7.61448	0.770488	9.88266	4.94997e-23	5.12015e-22	PF07722(Peptidase C26)	AT5G38200	Class I glutamine amidotransferase-like superfamily protein
Medtr5g090070	7.60712	0.745637	10.2022	1.93869e-24	2.14698e-23	PF00266(Aminotransferase class-V)	AT2G13360	alanine:glyoxylate aminotransferase
Medtr6g027740	7.58414	0.921676	8.22864	1.89353e-16	1.38452e-15
Medtr8g024120	7.5775	0.504372	15.0236	5.14178e-51	1.50125e-49	PF03171(2OG-Fe(II) oxygenase superfamily)	AT4G10490	2-oxoglutarate (2OG) and Fe(II)-dependent oxygenase superfamily protein
Medtr7g068420	7.53308	1.22903	6.12931	8.82623e-10	4.13607e-09
Medtr7g077160	7.49517	0.61485	12.1902	3.50413e-34	5.79168e-33	PF00228(Bowman-Birk serine protease inhibitor family)
Medtr1g022315	7.46699	0.269314	27.7259	3.39936e-169	1.19929e-166	PF00083(Sugar (and other) transporter)	AT1G75220	Major facilitator superfamily protein
Medtr8g461330	7.41609	1.27188	5.83082	5.51541e-09	2.43192e-08	PF03171(2OG-Fe(II) oxygenase superfamily)	AT1G78440	Arabidopsis thaliana gibberellin 2-oxidase 1
Medtr5g075650	7.30293	0.356304	20.4963	2.321e-93	1.99371e-91	PF00560(Leucine Rich Repeat), PF00069(Protein kinase domain)	AT1G06840	Leucine-rich repeat protein kinase family protein
Medtr1g113970	7.2838	1.28488	5.66887	1.43741e-08	6.14153e-08
Medtr6g016640	7.25981	0.574539	12.6359	1.33869e-36	2.39711e-35	PF01619(Proline dehydrogenase)	AT3G30775	Methylenetetrahydrofolate reductase family protein
Medtr1g070015	7.24575	1.39122	5.20822	1.90662e-07	7.36576e-07	PF00847(AP2 domain)	AT3G23240	ethylene response factor 1
Medtr6g027730	7.24011	0.620464	11.6689	1.83858e-31	2.72568e-30	PF07847(Protein of unknown function (DUF1637))	AT5G39890	Protein of unknown function (DUF1637)
Medtr6g016635	7.23254	0.532866	13.5729	5.79806e-42	1.26435e-40	PF01619(Proline dehydrogenase)	AT3G30775	Methylenetetrahydrofolate reductase family protein
Medtr4g080700	7.16824	0.784601	9.13616	6.47106e-20	5.7296e-19	PF00112(Papain family cysteine protease), PF08246(Cathepsin propeptide inhibitor domain (I29))	AT5G45890	senescence-associated gene 12
Medtr2g103490	7.05978	0.441028	16.0076	1.13154e-57	3.95438e-56	PF00903(Glyoxalase/Bleomycin resistance protein/Dioxygenase superfamily)	AT1G80160	Lactoylglutathione lyase / glyoxalase I family protein
Medtr3g107500	7.0139	1.27372	5.50662	3.65795e-08	1.51275e-07	PF03330(Rare lipoprotein A (RlpA)-like double-psi beta-barrel)	AT2G18660	plant natriuretic peptide A
Medtr8g090095	6.97316	0.585713	11.9054	1.10889e-32	1.71603e-31	PF00201(UDP-glucoronosyl and UDP-glucosyl transferase)	AT2G15490	UDP-glycosyltransferase 73B4
Medtr4g118800	6.96074	0.530619	13.1181	2.59201e-39	5.12096e-38	PF04535(Domain of unknown function (DUF588))	AT4G15610	Uncharacterised protein family (UPF0497)
Medtr3g464580	6.92446	0.505611	13.6952	1.08439e-42	2.43085e-41	PF00733(Asparagine synthase)	AT3G47340	glutamine-dependent asparagine synthase 1
Medtr7g072480	6.91197	0.861158	8.02636	1.00407e-15	7.03442e-15	PF00141(Peroxidase)	AT5G05340	Peroxidase superfamily protein
Medtr7g026993	6.86968	1.46073	4.7029	2.56492e-06	8.8975e-06
Medtr6g042660	6.85712	1.13707	6.03054	1.6341e-09	7.50219e-09	PF01095(Pectinesterase)	AT3G24130	Pectin lyase-like superfamily protein
Medtr5g024080	6.84183	0.786031	8.70428	3.19609e-18	2.58575e-17	PF01301(Glycosyl hydrolases family 35), PF02140(Galactose binding lectin domain)	AT5G20710	beta-galactosidase 7
Medtr2g079320	6.83899	1.23757	5.52616	3.27312e-08	1.35823e-07	PF00097(Zinc finger, C3HC4 type (RING finger))	AT1G53010	RING/U-box superfamily protein
Medtr2g024050	6.82553	1.03358	6.60378	4.00793e-11	2.07685e-10	PF04885(Stigma-specific protein, Stig1)	AT1G11925	Stigma-specific Stig1 family protein
Medtr4g025730	6.80349	0.297565	22.8639	1.0633e-115	1.40048e-113	PF01095(Pectinesterase), PF04043(Plant invertase/pectin methylesterase inhibitor)	AT2G45220	Plant invertase/pectin methylesterase inhibitor superfamily
Medtr2g435490	6.79446	0.430012	15.8006	3.08035e-56	1.03499e-54	PF00188(Cysteine-rich secretory protein family)	AT2G14610	pathogenesis-related gene 1
Medtr5g040430	6.77933	0.54766	12.3787	3.40729e-35	5.84347e-34	PF02798(Glutathione S-transferase, N-terminal domain)	AT5G62480	glutathione S-transferase tau 9
Medtr4g083660	6.77888	1.5763	4.3005	1.70415e-05	5.42571e-05	PF00295(Glycosyl hydrolases family 28)	AT3G59850	Pectin lyase-like superfamily protein
Medtr4g129650	6.77577	0.39647	17.0903	1.75415e-65	7.60005e-64	PF00892(EamA-like transporter family)	AT4G30420	nodulin MtN21 /EamA-like transporter family protein
Medtr4g066240	6.7448	0.585735	11.5151	1.1072e-30	1.59358e-29	PF00232(Glycosyl hydrolase family 1)	AT2G44480	beta glucosidase 17
Medtr2g020710	6.74257	1.30044	5.18484	2.162e-07	8.29827e-07	PF00083(Sugar (and other) transporter)	AT5G18840	Major facilitator superfamily protein
Medtr1g059630	6.73629	0.636639	10.581	3.64959e-26	4.38232e-25
Medtr1g070020	6.69504	1.13334	5.90736	3.47641e-09	1.55695e-08	PF00847(AP2 domain)	AT3G23240	ethylene response factor 1
Medtr5g098170	6.69259	1.23783	5.4067	6.41955e-08	2.59505e-07	PF00891(O-methyltransferase), PF08100(Dimerisation domain)	AT5G54160	O-methyltransferase 1
Medtr2g008580	6.68715	1.40846	4.74786	2.0558e-06	7.20392e-06	PF00234(Protease inhibitor/seed storage/LTP family)	AT5G64080	Bifunctional inhibitor/lipid-transfer protein/seed storage 2S albumin superfamily protein
Medtr6g042610	6.68465	1.30112	5.13762	2.78236e-07	1.05766e-06	PF00067(Cytochrome P450)	AT4G31970	cytochrome P450, family 82, subfamily C, polypeptide 2
Medtr2g076590	6.6842	1.14555	5.83494	5.38095e-09	2.3751e-08	PF08276(PAN-like domain), PF01453(D-mannose binding lectin)	AT1G78860	D-mannose binding lectin protein with Apple-like carbohydrate-binding domain
Medtr8g102150	6.65955	0.28992	22.9703	9.23284e-117	1.25512e-114	PF05153(Myo-inositol oxygenase)	AT2G19800	myo-inositol oxygenase 2
Medtr7g010760	6.65602	0.553443	12.0266	2.57627e-33	4.13586e-32
Medtr3g095680	6.6492	0.635987	10.4549	1.39099e-25	1.61592e-24	PF00069(Protein kinase domain)	AT1G49160	Protein kinase superfamily protein
Medtr8g028430	6.63327	0.362621	18.2926	9.48406e-75	5.27318e-73	PF00150(Cellulase (glycosyl hydrolase family 5))	AT1G13130	Cellulase (glycosyl hydrolase family 5) protein
Medtr1g102510	6.62922	1.27134	5.21438	1.84436e-07	7.12986e-07		AT5G51680	hydroxyproline-rich glycoprotein family protein
Medtr5g005920	6.61324	1.061	6.23301	4.57545e-10	2.18701e-09	PF07859(alpha/beta hydrolase fold)	AT1G47480	alpha/beta-Hydrolases superfamily protein
Medtr1g080250	6.56804	0.254571	25.8005	8.76201e-147	2.16385e-144	PF01212(Beta-eliminating lyase)	AT1G08630	threonine aldolase 1
Medtr5g019350	6.52427	0.448364	14.5513	5.73402e-48	1.55327e-46	PF04678(Mitochondrial calcium uniporter)	AT2G23790	Protein of unknown function (DUF607)
Medtr6g042290	6.51733	2.51997	2.58627	0.00970216	0.0206837	PF00004(ATPase family associated with various cellular activities (AAA))	AT5G40010	AAA-ATPase 1
Medtr8g061360	6.51601	0.300206	21.7052	1.83392e-104	1.9763e-102	PF00155(Aminotransferase class I and II)	AT5G53970	Tyrosine transaminase family protein
Medtr3g069310	6.49508	0.307967	21.0901	9.79763e-99	9.39653e-97
Medtr7g085630	6.45638	0.207025	31.1865	1.62301e-213	1.23328e-210	PF00208(Glutamate/Leucine/Phenylalanine/Valine dehydrogenase), PF02812(Glu/Leu/Phe/Val dehydrogenase, dimerisation domain)	AT5G18170	glutamate dehydrogenase 1
Medtr3g096400	6.45022	1.07033	6.02638	1.67672e-09	7.68593e-09	PF02365(No apical meristem (NAM) protein)	AT5G64530	xylem NAC domain 1
Medtr1g075340	6.41586	0.666104	9.63193	5.86169e-22	5.75775e-21	PF00280(Potato inhibitor I family)	AT2G38870	Serine protease inhibitor, potato inhibitor I-type family protein
Medtr1g077260	6.41548	1.50144	4.2729	1.92947e-05	6.10049e-05
Medtr4g032865	6.38421	0.553916	11.5256	9.80251e-31	1.4143e-29	PF02428(Potato type II proteinase inhibitor family)	AT1G72060	serine-type endopeptidase inhibitors
Medtr1g009900	6.37412	1.43762	4.4338	9.25847e-06	3.03009e-05		AT5G10625
Medtr2g094020	6.36476	0.649833	9.79444	1.18951e-22	1.20805e-21	PF01301(Glycosyl hydrolases family 35), PF02140(Galactose binding lectin domain), PF02837(Glycosyl hydrolases family 2, sugar binding domain)	AT2G28470	beta-galactosidase 8
Medtr6g059410	6.36047	0.505421	12.5845	2.57003e-36	4.56065e-35	PF00197(Trypsin and protease inhibitor)	AT1G73260	kunitz trypsin inhibitor 1
Medtr8g080370	6.32947	0.141987	44.578	0	0	PF01344(Kelch motif), PF00646(F-box domain)	AT1G67480	Galactose oxidase/kelch repeat superfamily protein
Medtr7g083410	6.31504	0.291081	21.6951	2.28019e-104	2.43948e-102	PF03009(Glycerophosphoryl diester phosphodiesterase family)	AT3G02040	senescence-related gene 3
Medtr7g111320	6.28717	1.2632	4.97717	6.45203e-07	2.37258e-06	PF00010(Helix-loop-helix DNA-binding domain)	AT1G09530	phytochrome interacting factor 3
Medtr4g118355	6.26073	0.315726	19.8296	1.65318e-87	1.24662e-85	PF02896(PEP-utilising enzyme, TIM barrel domain)	AT4G15530	pyruvate orthophosphate dikinase
Medtr3g103570	6.25243	0.669987	9.33216	1.03735e-20	9.58583e-20	PF00249(Myb-like DNA-binding domain)	AT3G49690	myb domain protein 84
Medtr5g015880	6.24612	0.175918	35.5058	4.00293e-276	6.59038e-273	PF03195(Protein of unknown function DUF260)	AT4G37540	LOB domain-containing protein 39
Medtr8g089825	6.24476	0.650306	9.6028	7.78014e-22	7.59185e-21
Medtr7g009820	6.23883	0.542348	11.5034	1.26872e-30	1.8234e-29	PF01011(PQQ enzyme repeat), PF10527()
Medtr3g080850	6.22132	0.902882	6.89051	5.55912e-12	3.07991e-11	PF01053(Cys/Met metabolism PLP-dependent enzyme)	AT1G64660	methionine gamma-lyase
Medtr3g101960	6.21056	0.50191	12.3738	3.62116e-35	6.19591e-34	PF02458(Transferase family)	AT5G42830	HXXXD-type acyl-transferase family protein
Medtr4g088765	6.19946	2.29316	2.70346	0.00686221	0.0150809	PF02458(Transferase family)	AT5G17540	HXXXD-type acyl-transferase family protein
Medtr1g060490	6.19908	0.470106	13.1866	1.04862e-39	2.10684e-38	PF00657(GDSL-like Lipase/Acylhydrolase)	AT5G03610	GDSL-like Lipase/Acylhydrolase superfamily protein
Medtr7g068430	6.19612	0.500874	12.3706	3.76983e-35	6.43543e-34
Medtr4g088955	6.18847	1.27211	4.86474	1.14609e-06	4.1194e-06	PF12481(Aluminium induced protein ), PF12504()	AT4G27450	Aluminium induced protein with YGL and LRDR motifs
Medtr5g030620	6.17622	0.142847	43.2366	0	0	PF01293(Phosphoenolpyruvate carboxykinase)	AT4G37870	phosphoenolpyruvate carboxykinase 1
Medtr4g124460	6.16484	1.27232	4.84534	1.26395e-06	4.52437e-06	PF08263(Leucine rich repeat N-terminal domain)	AT3G20820	Leucine-rich repeat (LRR) family protein
Medtr5g430730	6.13185	0.135653	45.2026	0	0	PF01293(Phosphoenolpyruvate carboxykinase)	AT4G37870	phosphoenolpyruvate carboxykinase 1
Medtr2g035190	6.10683	0.364834	16.7387	6.85075e-63	2.75845e-61	PF00407(Pathogenesis-related protein Bet v I family)	AT1G24020	MLP-like protein 423
Medtr2g076490	6.08183	0.592758	10.2602	1.0646e-24	1.18875e-23	PF01453(D-mannose binding lectin)	AT1G78860	D-mannose binding lectin protein with Apple-like carbohydrate-binding domain
Medtr4g086040	6.07892	0.900052	6.75396	1.43861e-11	7.73041e-11	PF00067(Cytochrome P450)	AT3G19270	cytochrome P450, family 707, subfamily A, polypeptide 4
Medtr4g133230	6.03455	0.387798	15.5611	1.33812e-54	4.31035e-53	PF00939(Sodium:sulfate symporter transmembrane region)	AT5G47560	tonoplast dicarboxylate transporter
Medtr6g037610	5.98708	0.324226	18.4658	3.89531e-76	2.24586e-74	PF00847(AP2 domain)	AT5G61890	Integrase-type DNA-binding superfamily protein
Medtr4g098480	5.94344	0.438222	13.5626	6.67088e-42	1.45148e-40	PF03760(Late embryogenesis abundant (LEA) group 1 )	AT1G32560	Late embryogenesis abundant protein, group 1 protein
Medtr7g102500	5.92038	1.41358	4.18821	2.81158e-05	8.75038e-05		AT2G36710	Pectin lyase-like superfamily protein
Medtr8g432440	5.89919	0.532987	11.0682	1.78999e-28	2.36814e-27		AT2G45760	BON association protein 2
Medtr6g029460	5.8952	0.493751	11.9396	7.35526e-33	1.15086e-31	PF02812(Glu/Leu/Phe/Val dehydrogenase, dimerisation domain), PF00208(Glutamate/Leucine/Phenylalanine/Valine dehydrogenase)	AT3G03910	glutamate dehydrogenase 3
Medtr4g066630	5.87967	0.663319	8.86401	7.71863e-19	6.42352e-18	PF00232(Glycosyl hydrolase family 1)	AT5G42260	beta glucosidase 12
Medtr3g028540	5.87278	1.31319	4.47215	7.74372e-06	2.5558e-05
Medtr1g098460	5.86022	0.457252	12.8162	1.33104e-37	2.46225e-36	PF00847(AP2 domain)	AT5G61890	Integrase-type DNA-binding superfamily protein
Medtr4g087460	5.83803	1.92987	3.02509	0.00248557	0.00591599	PF00106(short chain dehydrogenase)	AT3G59710	NAD(P)-binding Rossmann-fold superfamily protein
Medtr4g120200	5.82719	0.681968	8.54467	1.28908e-17	1.00717e-16
Medtr7g084350	5.81814	2.0645	2.81818	0.0048297	0.0109108	PF03492(SAM dependent carboxyl methyltransferase)	AT5G66430	S-adenosyl-L-methionine-dependent methyltransferases superfamily protein
Medtr7g110830	5.81586	0.451052	12.894	4.86609e-38	9.14435e-37	PF00249(Myb-like DNA-binding domain)	AT4G01680	myb domain protein 55
Medtr5g024940	5.7874	1.77131	3.2673	0.0010858	0.00273619	PF03171(2OG-Fe(II) oxygenase superfamily)	AT1G14130	2-oxoglutarate (2OG) and Fe(II)-dependent oxygenase superfamily protein
Medtr2g022490	5.78122	0.522035	11.0744	1.66989e-28	2.21419e-27		AT1G03220	Eukaryotic aspartyl protease family protein
Medtr2g029740	5.76376	1.29971	4.43466	9.22166e-06	3.01871e-05	PF00141(Peroxidase)	AT2G38380	Peroxidase superfamily protein
Medtr2g100600	5.76083	0.808696	7.12361	1.05139e-12	6.09556e-12	PF04885(Stigma-specific protein, Stig1)	AT1G11925	Stigma-specific Stig1 family protein
Medtr1g023530	5.75966	1.44875	3.9756	7.02013e-05	0.000208333		AT1G80630	RNI-like superfamily protein
Medtr3g088845	5.75094	0.417972	13.7592	4.48629e-43	1.02035e-41	PF00676(Dehydrogenase E1 component)	AT1G21400	Thiamin diphosphate-binding fold (THDP-binding) superfamily protein
Medtr8g432420	5.74747	0.454013	12.6593	9.94088e-37	1.78761e-35		AT2G45760	BON association protein 2
Medtr4g088200	5.73235	0.680437	8.4245	3.6228e-17	2.76278e-16	PF00891(O-methyltransferase), PF08100(Dimerisation domain)	AT4G35150	O-methyltransferase family protein
Medtr1g073770	5.73104	0.823429	6.95997	3.40339e-12	1.91166e-11		AT1G06137
MT4Noble_035956	5.72734	1.26262	4.53608	5.73089e-06	1.91839e-05
Medtr3g085020	5.72304	0.93664	6.11018	9.95193e-10	4.64816e-09	PF11820(Protein of unknown function (DUF3339))	AT3G48660	Protein of unknown function (DUF 3339)
Medtr4g025690	5.70754	0.939279	6.07652	1.22822e-09	5.6988e-09	PF01095(Pectinesterase), PF04043(Plant invertase/pectin methylesterase inhibitor)	AT2G45220	Plant invertase/pectin methylesterase inhibitor superfamily
Medtr2g031590	5.70259	0.695377	8.20072	2.38957e-16	1.73821e-15	PF01565(FAD binding domain ), PF08031(Berberine and berberine like )	AT1G30700	FAD-binding Berberine family protein
Medtr4g060480	5.68912	0.129185	44.0387	0	0	PF02770(Acyl-CoA dehydrogenase, middle domain), PF00441(Acyl-CoA dehydrogenase, C-terminal domain), PF02771(Acyl-CoA dehydrogenase, N-terminal domain)	AT3G45300	isovaleryl-CoA-dehydrogenase
Medtr1g492860	5.68833	1.24583	4.56589	4.97374e-06	1.67592e-05	PF00400(WD domain, G-beta repeat)	AT1G80670	Transducin/WD40 repeat-like superfamily protein
Medtr2g039410	5.67781	0.475297	11.9458	6.82819e-33	1.07122e-31	PF09265(Cytokinin dehydrogenase 1, FAD and cytokinin binding), PF01565(FAD binding domain )	AT5G56970	cytokinin oxidase 3
Medtr6g028100	5.65801	0.564845	10.0169	1.28439e-23	1.36182e-22	PF00933(Glycosyl hydrolase family 3 N terminal domain), PF01915(Glycosyl hydrolase family 3 C-terminal domain)	AT5G04885	Glycosyl hydrolase family protein
Medtr3g058720	5.65339	1.27862	4.42149	9.80219e-06	3.19938e-05	PF07725(Leucine Rich Repeat), PF01582(TIR domain), PF00931(NB-ARC domain)	AT5G17680	disease resistance protein (TIR-NBS-LRR class), putative
Medtr8g096910	5.64026	0.373011	15.1209	1.1794e-51	3.50217e-50	PF00314(Thaumatin family)	AT4G11650	osmotin 34
Medtr1g088620	5.63774	0.703084	8.01858	1.06971e-15	7.47131e-15	PF00582(Universal stress protein family), PF04434(SWIM zinc finger)	AT2G47710	Adenine nucleotide alpha hydrolases-like superfamily protein
Medtr1g107390	5.62968	1.46796	3.83503	0.000125551	0.000361087
Medtr4g099010	5.60883	0.522634	10.7319	7.21265e-27	8.90984e-26	PF04043(Plant invertase/pectin methylesterase inhibitor)	AT5G46960	Plant invertase/pectin methylesterase inhibitor superfamily protein
Medtr3g077040	5.60547	1.26893	4.41747	9.98649e-06	3.25649e-05		AT5G56660	IAA-leucine resistant (ILR)-like 2
Medtr4g478180	5.60546	1.30332	4.30091	1.70096e-05	5.41672e-05	PF00249(Myb-like DNA-binding domain)	AT5G16770	myb domain protein 9
Medtr7g112620	5.59576	0.579595	9.65461	4.6995e-22	4.64232e-21	PF00561(alpha/beta hydrolase fold)	AT3G05600	alpha/beta-Hydrolases superfamily protein
Medtr5g071350	5.58879	1.27095	4.39733	1.09589e-05	3.56064e-05	PF03005()	AT5G58600	Plant protein of unknown function (DUF828)
Medtr4g106500	5.58387	0.307694	18.1475	1.34466e-73	7.23212e-72		AT1G19020
Medtr6g012830	5.58354	0.421732	13.2395	5.18656e-40	1.04846e-38	PF09366(Protein of unknown function (DUF1997))	AT5G39530	Protein of unknown function (DUF1997)
Medtr5g017680	5.57437	1.8493	3.01432	0.00257557	0.00611106	PF01734(Patatin-like phospholipase)	AT4G37070	Acyl transferase/acyl hydrolase/lysophospholipase superfamily protein
Medtr1g015020	5.57256	0.679452	8.20155	2.37304e-16	1.72704e-15	PF07714(Protein tyrosine kinase)	AT2G05940	Protein kinase superfamily protein
Medtr0020s0120	5.57136	1.35323	4.11709	3.83684e-05	0.000117561	PF01161(Phosphatidylethanolamine-binding protein)	AT5G62040	PEBP (phosphatidylethanolamine-binding protein) family protein
Medtr1g077480	5.56521	0.706472	7.87746	3.3409e-15	2.26252e-14	PF02065(Melibiase)	AT5G08370	alpha-galactosidase 2
Medtr5g032220	5.55957	1.81659	3.06044	0.00221008	0.00531105	PF10551(MULE transposase domain)	AT3G22170	far-red elongated hypocotyls 3
Medtr3g101410	5.558	1.4917	3.72594	0.000194588	0.0005451	PF01734(Patatin-like phospholipase)	AT2G26560	phospholipase A 2A
Medtr2g102030	5.55689	0.629204	8.83163	1.03164e-18	8.53505e-18	PF03398(Regulator of Vps4 activity in the MVB pathway)	AT1G79910	Regulator of Vps4 activity in the MVB pathway protein
MT4Noble_004459	5.55308	1.34592	4.12588	3.69324e-05	0.000113325
Medtr1g070010	5.54158	1.58435	3.49769	0.000469305	0.00124981
Medtr2g031600	5.5317	0.513035	10.7823	4.1729e-27	5.1916e-26	PF08031(Berberine and berberine like ), PF01565(FAD binding domain )	AT5G44400	FAD-binding Berberine family protein
Medtr3g108830	5.52965	1.5885	3.48106	0.000499439	0.00132577	PF07839(Plant calmodulin-binding domain)	AT5G10660	calmodulin-binding protein-related
Medtr3g111530	5.51141	0.69864	7.88877	3.05174e-15	2.07142e-14	PF00067(Cytochrome P450)	AT5G42650	allene oxide synthase
Medtr5g024660	5.51053	0.947618	5.81514	6.05848e-09	2.66345e-08	PF03547(Membrane transport protein)	AT5G65980	Auxin efflux carrier family protein
Medtr5g016440	5.50959	0.504262	10.926	8.65401e-28	1.11167e-26	PF00067(Cytochrome P450)	AT4G37340	cytochrome P450, family 81, subfamily D, polypeptide 3
Medtr7g077190	5.50831	1.60219	3.43798	0.000586064	0.00153794	PF00228(Bowman-Birk serine protease inhibitor family)
Medtr3g071470	5.50708	1.3275	4.14845	3.34729e-05	0.000103395	PF01190(Pollen proteins Ole e I like)	AT5G05500	Pollen Ole e 1 allergen and extensin family protein
Medtr4g114080	5.50659	0.380718	14.4637	2.05413e-47	5.45957e-46	PF00903(Glyoxalase/Bleomycin resistance protein/Dioxygenase superfamily)	AT1G80160	Lactoylglutathione lyase / glyoxalase I family protein
Medtr1g107405	5.49763	1.57547	3.48951	0.000483913	0.00128698
Medtr4g019225	5.46904	0.609616	8.97128	2.93088e-19	2.50308e-18	PF07732(Multicopper oxidase), PF00394(Multicopper oxidase), PF07731(Multicopper oxidase)	AT3G09220	laccase 7
Medtr3g085030	5.46299	1.66845	3.27428	0.0010593	0.00267351	PF11820(Protein of unknown function (DUF3339))	AT5G08391	Protein of unknown function (DUF 3339)
Medtr2g018175	5.46227	0.479545	11.3905	4.66227e-30	6.57309e-29	PF04520(Senescence regulator)	AT1G29640	Protein of unknown function, DUF584
Medtr3g110590	5.46206	0.246102	22.1943	3.89856e-109	4.56656e-107		AT2G22795
Medtr5g040960	5.45821	0.416339	13.11	2.8851e-39	5.69241e-38	PF00445(Ribonuclease T2 family)	AT2G02990	ribonuclease 1
Medtr8g022340	5.44304	0.941921	5.77866	7.5296e-09	3.28485e-08	PF02519(Auxin responsive protein)	AT1G19840	SAUR-like auxin-responsive protein family
Medtr7g010750	5.43477	0.187236	29.0263	3.06685e-185	1.44264e-182	PF01490(Transmembrane amino acid transporter protein)	AT3G28960	Transmembrane amino acid transporter family protein
Medtr4g095330	5.4254	1.11285	4.87521	1.08693e-06	3.9134e-06	PF10714(Late embryogenesis abundant protein 18)	AT2G23110	Late embryogenesis abundant protein, group 6
Medtr7g077180	5.40276	0.607716	8.89028	6.09539e-19	5.10562e-18	PF00228(Bowman-Birk serine protease inhibitor family)
Medtr1g492630	5.39965	0.247021	21.8591	6.3688e-106	7.0689e-104		AT3G52230
Medtr5g045710	5.39503	1.11997	4.81712	1.45648e-06	5.18286e-06	PF00107(Zinc-binding dehydrogenase), PF08240(Alcohol dehydrogenase GroES-like domain)	AT4G22110	GroES-like zinc-binding dehydrogenase family protein
Medtr1g095970	5.3923	1.58387	3.4045	0.000662856	0.00172586	PF04853()	AT4G09510	cytosolic invertase 2
Medtr1g075380	5.37748	0.828006	6.49449	8.33142e-11	4.2076e-10	PF00280(Potato inhibitor I family)	AT2G38870	Serine protease inhibitor, potato inhibitor I-type family protein
Medtr2g035120	5.37386	1.13862	4.71965	2.36256e-06	8.22443e-06	PF00407(Pathogenesis-related protein Bet v I family)	AT1G24020	MLP-like protein 423
Medtr4g081380	5.37251	0.286221	18.7705	1.31697e-78	8.0804e-77	PF00085(Thioredoxin)	AT1G11530	C-terminal cysteine residue is changed to a serine 1
Medtr7g090420	5.36695	0.545489	9.83878	7.66366e-23	7.85857e-22
Medtr8g089340	5.36678	1.95561	2.7443	0.00606402	0.0134794	PF00324(Amino acid permease)	AT4G21120	amino acid transporter 1
Medtr7g104330	5.36403	0.330087	16.2503	2.22119e-59	8.09655e-58	PF00149(Calcineurin-like phosphoesterase)	AT3G52820	purple acid phosphatase 22
Medtr5g090280	5.3415	0.912777	5.85192	4.85926e-09	2.15285e-08	PF01554(MatE)	AT3G59030	MATE efflux family protein
Medtr2g080280	5.33139	0.44394	12.0093	3.17712e-33	5.07568e-32
Medtr8g045570	5.31687	1.71354	3.10287	0.00191657	0.00465401	PF00407(Pathogenesis-related protein Bet v I family)	AT5G28010	Polyketide cyclase/dehydrase and lipid transport superfamily protein
Medtr1g095530	5.3159	0.309065	17.1999	2.65908e-66	1.1779e-64	PF00335(Tetraspanin family)	AT3G12090	tetraspanin6
Medtr1g016620	5.31068	1.12026	4.74057	2.13121e-06	7.45497e-06	PF00481(Protein phosphatase 2C)	AT1G79630	Protein phosphatase 2C family protein
Medtr1g081420	5.29697	0.560611	9.44857	3.43502e-21	3.24607e-20	PF00383(Cytidine and deoxycytidylate deaminase zinc-binding region)	AT5G28050	Cytidine/deoxycytidylate deaminase family protein
Medtr5g067740	5.29589	1.20561	4.39269	1.11954e-05	3.63352e-05		AT5G05220
Medtr4g118350	5.26382	0.184804	28.4833	1.88547e-178	7.55078e-176	PF00391(PEP-utilising enzyme, mobile domain), PF01326(Pyruvate phosphate dikinase, PEP/pyruvate binding domain)	AT4G15530	pyruvate orthophosphate dikinase
Medtr7g072470	5.26088	1.19579	4.39951	1.08494e-05	3.52816e-05		AT3G56220	transcription regulators
Medtr1g013100	5.26027	1.36675	3.84875	0.000118723	0.000342585	PF05910(Plant protein of unknown function (DUF868))	AT5G11000	Plant protein of unknown function (DUF868)
Medtr1g060500	5.23947	2.11378	2.47872	0.0131856	0.027335	PF00657(GDSL-like Lipase/Acylhydrolase)	AT5G03610	GDSL-like Lipase/Acylhydrolase superfamily protein
Medtr6g024050	5.23729	2.30161	2.27549	0.0228766	0.0450076	PF04043(Plant invertase/pectin methylesterase inhibitor)	AT3G17220	pectin methylesterase inhibitor 2
Medtr2g030400	5.23315	0.14777	35.4142	1.03074e-274	1.60769e-271	PF03446(NAD binding domain of 6-phosphogluconate dehydrogenase)	AT4G20930	6-phosphogluconate dehydrogenase family protein
Medtr1g060360	5.23202	0.893757	5.85396	4.80009e-09	2.12695e-08	PF00149(Calcineurin-like phosphoesterase)	AT3G52820	purple acid phosphatase 22
Medtr4g127670	5.23026	1.35623	3.85648	0.00011503	0.000332635	PF00141(Peroxidase)	AT2G18980	Peroxidase superfamily protein
Medtr2g099040	5.22712	0.194657	26.8529	7.7959e-159	2.38177e-156	PF05187(Electron transfer flavoprotein-ubiquinone oxidoreductase, 4Fe-4S)	AT2G43400	electron-transfer flavoprotein:ubiquinone oxidoreductase
Medtr2g075940	5.22156	1.03037	5.06766	4.02742e-07	1.51003e-06
Medtr5g090290	5.21453	1.36002	3.83416	0.000125994	0.000362193	PF01554(MatE)	AT3G59030	MATE efflux family protein
Medtr4g090600	5.20693	0.317921	16.3781	2.74372e-60	1.02535e-58	PF00083(Sugar (and other) transporter)	AT1G11260	sugar transporter 1
Medtr4g122930	5.19475	1.28882	4.03062	5.56309e-05	0.000167084	PF04398(Protein of unknown function, DUF538)	AT5G49600	Protein of unknown function, DUF538
Medtr6g087770	5.19086	1.4032	3.6993	0.000216195	0.000601873	PF01221(Dynein light chain type 1 )	AT1G52240	RHO guanyl-nucleotide exchange factor 11
Medtr5g088770	5.19015	0.50365	10.3051	6.68476e-25	7.53816e-24	PF00031(Cystatin domain)	AT3G12490	cystatin B
Medtr2g038380	5.18479	0.545104	9.51156	1.87827e-21	1.79904e-20	PF00560(Leucine Rich Repeat)	AT2G19330	plant intracellular ras group-related LRR 6
Medtr1g006975	5.18292	0.829796	6.24601	4.21063e-10	2.01717e-09	PF01849(NAC domain), PF00931(NB-ARC domain)	AT4G27220	NB-ARC domain-containing disease resistance protein
Medtr2g035150	5.17509	0.606572	8.53168	1.44232e-17	1.12364e-16	PF00407(Pathogenesis-related protein Bet v I family)
Medtr5g083500	5.17256	0.642314	8.053	8.07862e-16	5.6894e-15		AT2G40390
Medtr4g123040	5.1706	0.954576	5.41664	6.07286e-08	2.45994e-07	PF00249(Myb-like DNA-binding domain)	AT5G49620	myb domain protein 78
Medtr8g077290	5.15454	0.663282	7.77126	7.77082e-15	5.15533e-14	PF00561(alpha/beta hydrolase fold)	AT2G18360	alpha/beta-Hydrolases superfamily protein
Medtr8g432460	5.15447	0.635665	8.10878	5.11301e-16	3.65031e-15		AT2G45760	BON association protein 2
Medtr1g077890	5.14928	0.281018	18.3237	5.35839e-75	2.99615e-73	PF01053(Cys/Met metabolism PLP-dependent enzyme)	AT1G64660	methionine gamma-lyase
Medtr2g043730	5.14844	1.42547	3.61175	0.000304138	0.000831161	PF02298(Plastocyanin-like domain)	AT2G02850	plantacyanin
Medtr5g066070	5.1245	1.17242	4.37088	1.23749e-05	3.99881e-05	PF00042(Globin)	AT3G10520	haemoglobin 2
Medtr7g098780	5.12188	1.04989	4.87849	1.06903e-06	3.85176e-06	PF01061(ABC-2 type transporter), PF00005(ABC transporter), PF08370(Plant PDR ABC transporter associated)	AT1G15520	pleiotropic drug resistance 12
Medtr4g066580	5.12121	0.806256	6.35184	2.12756e-10	1.04319e-09	PF00232(Glycosyl hydrolase family 1)	AT2G44480	beta glucosidase 17
MT4Noble_003367	5.11541	1.86843	2.73781	0.00618498	0.0137133
Medtr2g075550	5.11471	0.565707	9.04127	1.54858e-19	1.34621e-18
Medtr5g030910	5.10067	1.36273	3.74298	0.000181848	0.000511344	PF01061(ABC-2 type transporter), PF00005(ABC transporter)	AT3G55100	ABC-2 type transporter family protein
Medtr6g023910	5.09302	0.853655	5.96613	2.42949e-09	1.10089e-08	PF00106(short chain dehydrogenase)	AT2G47140	NAD(P)-binding Rossmann-fold superfamily protein
Medtr6g007633	5.09051	1.51563	3.35868	0.000783169	0.00201802	PF03083(Sugar efflux transporter for intercellular exchange)	AT5G62850	Nodulin MtN3 family protein
Medtr2g087350	5.07197	0.569457	8.90668	5.2584e-19	4.42581e-18	PF04564(U-box domain)	AT2G35930	plant U-box 23
Medtr1g084220	5.0683	1.37821	3.67743	0.000235592	0.000653111
Medtr8g096730	5.06662	0.673514	7.52266	5.36717e-14	3.36769e-13	PF03106(WRKY DNA -binding domain)	AT5G13080	WRKY DNA-binding protein 75
Medtr2g450680	5.06346	1.11103	4.55743	5.17826e-06	1.74067e-05
Medtr5g043330	5.06064	1.65652	3.05498	0.00225076	0.00540091
Medtr2g102730	5.06028	0.363119	13.9356	3.85093e-44	9.15174e-43	PF03000(NPH3 family)	AT3G15570	Phototropic-responsive NPH3 family protein
Medtr5g010100	5.05014	0.233868	21.5939	2.04839e-103	2.16029e-101	PF00097(Zinc finger, C3HC4 type (RING finger))	AT3G61460	brassinosteroid-responsive RING-H2
Medtr2g099950	5.04827	0.235402	21.4454	5.04634e-102	5.17468e-100	PF08244(Glycosyl hydrolases family 32 C terminal), PF00251(Glycosyl hydrolases family 32 N-terminal domain)	AT3G13790	Glycosyl hydrolases family 32 protein
MT4Noble_001008	5.04422	1.10127	4.58036	4.64167e-06	1.56902e-05
Medtr2g047968	5.04238	0.987099	5.10828	3.25105e-07	1.22889e-06	PF01733(Nucleoside transporter)	AT4G05120	Major facilitator superfamily protein
Medtr2g023760	5.04079	0.616514	8.17627	2.92757e-16	2.11761e-15		AT4G22030	F-box family protein with a domain of unknown function (DUF295)
Medtr2g073010	5.03118	0.396461	12.6902	6.6989e-37	1.21198e-35	PF00197(Trypsin and protease inhibitor)	AT1G17860	Kunitz family trypsin and protease inhibitor protein
Medtr5g089180	5.00861	0.581992	8.60597	7.56723e-18	6.00254e-17
Medtr3g102970	5.00817	1.48577	3.37077	0.000749589	0.00193722
Medtr2g030405	5.00776	0.486726	10.2887	7.92751e-25	8.91582e-24		AT2G27950	Ring/U-Box superfamily protein
Medtr5g086020	5.00444	1.44586	3.46121	0.000537759	0.00141986	PF00011(Hsp20/alpha crystallin family)	AT2G27140	HSP20-like chaperones superfamily protein
Medtr8g103233	5.00375	0.542646	9.22103	2.94271e-20	2.65552e-19	PF00854(POT family)	AT3G16180	Major facilitator superfamily protein
Medtr4g101760	4.98528	0.924347	5.3933	6.91737e-08	2.79058e-07	PF04043(Plant invertase/pectin methylesterase inhibitor)	AT5G62350	Plant invertase/pectin methylesterase inhibitor superfamily protein
Medtr8g042820	4.98389	0.805994	6.18353	6.26828e-10	2.96884e-09	PF07690(Major Facilitator Superfamily)	AT5G13750	zinc induced facilitator-like 1
Medtr7g024520	4.97646	1.35351	3.67672	0.000236252	0.000654882	PF08100(Dimerisation domain), PF00891(O-methyltransferase)	AT4G35160	O-methyltransferase family protein
Medtr2g083920	4.94924	0.289972	17.068	2.56712e-65	1.10576e-63	PF00226(DnaJ domain)	AT2G42750	DNAJ heat shock N-terminal domain-containing protein
Medtr8g016390	4.94002	1.30253	3.79263	0.000149063	0.000423697		AT3G20790	NAD(P)-binding Rossmann-fold superfamily protein
Medtr7g069930	4.91027	1.09649	4.47819	7.52799e-06	2.48848e-05		AT3G51750
Medtr7g027610	4.8852	0.549429	8.89142	6.03325e-19	5.055e-18	PF00125(Core histone H2A/H2B/H3/H4)	AT2G38810	histone H2A 8
Medtr4g089155	4.88427	1.57852	3.09421	0.00197335	0.00478092	PF00450(Serine carboxypeptidase)	AT1G11080	serine carboxypeptidase-like 31
Medtr8g012240	4.87947	0.402006	12.1378	6.65979e-34	1.088e-32	PF04720(PDDEXK-like family of unknown function)	AT3G07350	Protein of unknown function (DUF506)
Medtr8g024520	4.87244	0.346133	14.0768	5.27616e-45	1.28903e-43	PF00076(RNA recognition motif. (a.k.a. RRM, RBD, or RNP domain))	AT2G46780	RNA-binding (RRM/RBD/RNP motifs) family protein
Medtr4g088770	4.86953	0.294219	16.5507	1.58282e-61	6.11561e-60	PF04720(PDDEXK-like family of unknown function)	AT4G32480	Protein of unknown function (DUF506)
Medtr1g088640	4.86795	0.282688	17.2202	1.87331e-66	8.33566e-65	PF00582(Universal stress protein family)	AT2G47710	Adenine nucleotide alpha hydrolases-like superfamily protein
Medtr1g007830	4.85589	1.3493	3.59881	0.000319674	0.000871531		AT4G27790	Calcium-binding EF hand family protein
Medtr3g111970	4.85357	0.660917	7.34369	2.0778e-13	1.25562e-12		AT1G19530
Medtr1g027290	4.84642	1.27003	3.81598	0.000135645	0.000387978	PF03171(2OG-Fe(II) oxygenase superfamily)	AT2G36690	2-oxoglutarate (2OG) and Fe(II)-dependent oxygenase superfamily protein
Medtr4g132010	4.84596	1.55656	3.11326	0.00185036	0.0045043		AT3G20340
Medtr7g066780	4.82564	0.657032	7.3446	2.06369e-13	1.2476e-12	PF07690(Major Facilitator Superfamily)	AT2G38060	phosphate transporter 4;2
Medtr3g030540	4.82519	1.01665	4.74619	2.07281e-06	7.25899e-06	PF00295(Glycosyl hydrolases family 28)	AT3G07970	Pectin lyase-like superfamily protein
Medtr0005s0150	4.817	1.30132	3.70162	0.000214229	0.000596737	PF00150(Cellulase (glycosyl hydrolase family 5))	AT5G66460	Glycosyl hydrolase superfamily protein
Medtr7g100335	4.80423	0.497419	9.65832	4.53243e-22	4.48326e-21	PF09713(Plant protein 1589 of unknown function (A_thal_3526))	AT5G02580	Plant protein 1589 of unknown function
Medtr3g109100	4.79721	1.58184	3.03267	0.002424	0.00578196	PF00069(Protein kinase domain), PF00582(Universal stress protein family)	AT2G24370	Protein kinase protein with adenine nucleotide alpha hydrolases-like domain
MT4Noble_022311	4.79196	1.14865	4.17183	3.02166e-05	9.3786e-05
Medtr4g126160	4.79153	0.328403	14.5904	3.23365e-48	8.83219e-47	PF01565(FAD binding domain ), PF09265(Cytokinin dehydrogenase 1, FAD and cytokinin binding)	AT5G56970	cytokinin oxidase 3
Medtr1g009190	4.79148	0.137964	34.73	2.77587e-264	3.91729e-261	PF00288(GHMP kinases N terminal domain), PF10509(Galactokinase galactose-binding signature)	AT4G16130	arabinose kinase
Medtr5g096390	4.79002	1.90736	2.51134	0.0120275	0.0251541	PF01061(ABC-2 type transporter), PF00005(ABC transporter)	AT3G13220	ABC-2 type transporter family protein
Medtr1g044785	4.78898	0.481253	9.95107	2.49478e-23	2.61233e-22	PF06203(CCT motif)	AT1G04500	CCT motif family protein
Medtr2g043710	4.78727	0.436233	10.9741	5.09043e-28	6.61065e-27		AT5G20790
Medtr1g062370	4.78725	1.54272	3.10313	0.00191485	0.00465021	PF00314(Thaumatin family)	AT1G20030	Pathogenesis-related thaumatin superfamily protein
Medtr7g068650	4.78462	0.390921	12.2394	1.91516e-34	3.19211e-33	PF03171(2OG-Fe(II) oxygenase superfamily)	AT5G05600	2-oxoglutarate (2OG) and Fe(II)-dependent oxygenase superfamily protein
Medtr7g427690	4.78346	0.931465	5.13541	2.81525e-07	1.0692e-06	PF01852(START domain)	AT1G73360	homeodomain GLABROUS 11
Medtr4g057515	4.77647	1.56896	3.04436	0.00233179	0.00558223
Medtr7g086960	4.7761	1.3587	3.51519	0.000439434	0.00117639	PF00249(Myb-like DNA-binding domain)	AT1G69560	myb domain protein 105
Medtr8g073960	4.76881	1.32136	3.60903	0.000307347	0.00083939	PF00067(Cytochrome P450)	AT5G05260	cytochrome p450 79a2
Medtr3g111020	4.76514	1.72865	2.75657	0.00584111	0.013019	PF01554(MatE)	AT1G58340	MATE efflux family protein
Medtr1g075410	4.76364	0.771667	6.17318	6.69283e-10	3.16154e-09	PF00280(Potato inhibitor I family)	AT2G38870	Serine protease inhibitor, potato inhibitor I-type family protein
Medtr1g025450	4.76016	1.54078	3.08945	0.00200531	0.00485358	PF00112(Papain family cysteine protease)	AT5G18520	Lung seven transmembrane receptor family protein
Medtr3g083760	4.75564	0.699881	6.79493	1.08368e-11	5.8786e-11	PF00234(Protease inhibitor/seed storage/LTP family)	AT1G55260	Bifunctional inhibitor/lipid-transfer protein/seed storage 2S albumin superfamily protein
Medtr3g105730	4.75445	0.327001	14.5395	6.80416e-48	1.83644e-46	PF00481(Protein phosphatase 2C)	AT4G31750	HOPW1-1-interacting 2
Medtr3g102370	4.74718	0.520106	9.12734	7.02016e-20	6.20466e-19	PF01112(Asparaginase)	AT3G16150	N-terminal nucleophile aminohydrolases (Ntn hydrolases) superfamily protein
Medtr3g052900	4.73553	1.3171	3.59543	0.000323853	0.000882031
Medtr5g040940	4.72677	1.17886	4.0096	6.08213e-05	0.000181881	PF00445(Ribonuclease T2 family)	AT2G02990	ribonuclease 1
Medtr2g023770	4.7242	0.781841	6.04241	1.51831e-09	6.99877e-09		AT4G22030	F-box family protein with a domain of unknown function (DUF295)
Medtr4g095500	4.71604	1.08926	4.32956	1.49406e-05	4.79286e-05	PF03514(GRAS domain family)	AT3G49950	GRAS family transcription factor
MT4Noble_022322	4.69938	1.28769	3.64948	0.000262774	0.000724334
Medtr4g087100	4.69852	1.00071	4.69517	2.66385e-06	9.22558e-06	PF03171(2OG-Fe(II) oxygenase superfamily)	AT3G19000	2-oxoglutarate (2OG) and Fe(II)-dependent oxygenase superfamily protein
Medtr5g074600	4.69534	1.30773	3.59045	0.000330104	0.000897736	PF00891(O-methyltransferase), PF08100(Dimerisation domain)	AT4G35150	O-methyltransferase family protein
Medtr7g028020	4.69309	0.486532	9.64599	5.11139e-22	5.04248e-21	PF00067(Cytochrome P450)	AT5G06900	cytochrome P450, family 93, subfamily D, polypeptide 1
Medtr4g070630	4.69283	0.797068	5.88762	3.91806e-09	1.74657e-08		AT5G66440
Medtr4g081880	4.6884	1.85914	2.5218	0.0116755	0.0244809	PF04535(Domain of unknown function (DUF588))	AT5G15290	Uncharacterised protein family (UPF0497)
Medtr5g072960	4.68415	0.385495	12.151	5.66673e-34	9.27809e-33		AT1G13080	cytochrome P450, family 71, subfamily B, polypeptide 2
Medtr4g016720	4.67764	0.972008	4.81234	1.49171e-06	5.30186e-06	PF01699(Sodium/calcium exchanger protein)	AT2G38170	cation exchanger 1
Medtr5g062890	4.65509	0.985377	4.72417	2.31055e-06	8.04999e-06		AT5G22810	GDSL-like Lipase/Acylhydrolase superfamily protein
Medtr6g086170	4.64236	0.321927	14.4206	3.84209e-47	1.01029e-45	PF01740(STAS domain), PF00916(Sulfate permease family)	AT5G19600	sulfate transporter 3;5
Medtr5g017850	4.64179	1.39991	3.31577	0.000913902	0.00232816	PF00141(Peroxidase)	AT1G49570	Peroxidase superfamily protein
Medtr3g098910	4.63893	0.305866	15.1665	5.89169e-52	1.76364e-50	PF03083(Sugar efflux transporter for intercellular exchange)	AT5G50800	Nodulin MtN3 family protein
Medtr1g014180	4.63203	0.588366	7.87271	3.47032e-15	2.34747e-14	PF04525(LURP-one-related)	AT5G01750	Protein of unknown function (DUF567)
Medtr2g097580	4.63163	1.34245	3.45014	0.0005603	0.0014753	PF02535(ZIP Zinc transporter)	AT1G55910	zinc transporter 11 precursor
Medtr1g012335	4.62968	1.33765	3.46105	0.000538071	0.00142056
Medtr6g048440	4.62887	0.306178	15.1182	1.22805e-51	3.64298e-50	PF04116(Fatty acid hydroxylase superfamily)	AT4G25700	beta-hydroxylase 1
Medtr7g102840	4.61633	1.85333	2.49084	0.0127442	0.0265262		AT5G27730	Protein of unknown function (DUF1624)
Medtr2g023100	4.60829	1.06341	4.33351	1.4675e-05	4.71124e-05	PF00249(Myb-like DNA-binding domain)	AT2G46410	Homeodomain-like superfamily protein
Medtr7g098930	4.60006	1.61376	2.85052	0.00436474	0.00995529	PF00909(Ammonium Transporter Family)	AT4G13510	ammonium transporter 1;1
Medtr8g104290	4.59868	0.404279	11.375	5.56982e-30	7.83025e-29		AT1G48780
Medtr2g075780	4.58884	0.2846	16.1239	1.73443e-58	6.17786e-57	PF07722(Peptidase C26)	AT1G78680	gamma-glutamyl hydrolase 2
MT4Noble_000350	4.57133	1.42569	3.2064	0.00134409	0.00334162
Medtr4g081110	4.57106	0.528785	8.64446	5.40601e-18	4.32408e-17	PF00566(Rab-GTPase-TBC domain)	AT4G27100	Ypt/Rab-GAP domain of gyp1p superfamily protein
Medtr3g101260	4.55724	0.408637	11.1523	6.97958e-29	9.41037e-28	PF02298(Plastocyanin-like domain)	AT2G15780	Cupredoxin superfamily protein
Medtr5g020060	4.55292	0.268061	16.9847	1.06682e-64	4.4972e-63		AT5G66780
Medtr3g099700	4.54995	0.293626	15.4957	3.70761e-54	1.18528e-52	PF01554(MatE)	AT5G65380	MATE efflux family protein
Medtr4g058730	4.54949	1.32892	3.42345	0.000618311	0.00161698	PF00520(Ion transport protein), PF00027(Cyclic nucleotide-binding domain)	AT2G28260	cyclic nucleotide-gated channel 15
Medtr4g094550	4.54569	0.558951	8.13254	4.20384e-16	3.01502e-15	PF07712(Stress up-regulated Nod 19)	AT5G61820
Medtr3g095720	4.54363	1.73121	2.62453	0.00867683	0.0186778	PF05970(PIF1-like helicase)	AT3G51690	PIF1 helicase
Medtr2g034480	4.53684	0.35166	12.9012	4.43031e-38	8.35192e-37	PF00332(Glycosyl hydrolases family 17)	AT4G16260	Glycosyl hydrolase superfamily protein
MT4Noble_025786	4.53634	1.51617	2.99198	0.00277173	0.00654244
Medtr1g104750	4.5329	1.47142	3.08062	0.00206569	0.00498873	PF00083(Sugar (and other) transporter)	AT5G26340	Major facilitator superfamily protein
Medtr2g029560	4.53151	0.664275	6.82174	8.9944e-12	4.9034e-11	PF00141(Peroxidase)	AT5G06730	Peroxidase superfamily protein
Medtr6g004430	4.52946	0.287239	15.769	5.08791e-56	1.69416e-54	PF00288(GHMP kinases N terminal domain)	AT3G01640	glucuronokinase G
Medtr7g107570	4.5256	0.792294	5.71202	1.11645e-08	4.80623e-08		AT3G62990
Medtr3g058710	4.51049	1.44398	3.12366	0.00178616	0.00435877		AT5G17880	disease resistance protein (TIR-NBS-LRR class)
Medtr3g092490	4.50849	1.50003	3.0056	0.00265056	0.00627642	PF00076(RNA recognition motif. (a.k.a. RRM, RBD, or RNP domain))	AT2G46780	RNA-binding (RRM/RBD/RNP motifs) family protein
Medtr5g033720	4.50819	1.78835	2.52086	0.0117068	0.0245407	PF03790(KNOX1 domain ), PF00046(Homeobox domain), PF03791(KNOX2 domain ), PF03789(ELK domain )	AT1G23380	KNOTTED1-like homeobox gene 6
Medtr3g016355	4.50779	0.756783	5.95652	2.57672e-09	1.16689e-08
Medtr7g010790	4.50739	0.370065	12.18	3.97394e-34	6.56453e-33	PF01490(Transmembrane amino acid transporter protein)	AT3G28960	Transmembrane amino acid transporter family protein
Medtr3g080330	4.50139	1.30708	3.44386	0.000573477	0.00150732	PF00560(Leucine Rich Repeat), PF00646(F-box domain)	AT4G05460	RNI-like superfamily protein
Medtr1g066430	4.4995	1.31213	3.42916	0.00060546	0.00158575	PF00097(Zinc finger, C3HC4 type (RING finger))	AT2G37150	RING/U-box superfamily protein
Medtr4g043760	4.49403	1.31042	3.42946	0.00060479	0.00158414	PF00150(Cellulase (glycosyl hydrolase family 5))	AT5G66460	Glycosyl hydrolase superfamily protein
Medtr4g072260	4.49283	1.3311	3.37529	0.000737376	0.00190782	PF02519(Auxin responsive protein)	AT2G21210	SAUR-like auxin-responsive protein family
Medtr5g016320	4.49196	0.509175	8.82203	1.12398e-18	9.28868e-18	PF03321(GH3 auxin-responsive promoter)	AT2G14960	Auxin-responsive GH3 family protein
Medtr7g027960	4.49005	0.3148	14.2632	3.71173e-46	9.49069e-45	PF00067(Cytochrome P450)	AT5G06900	cytochrome P450, family 93, subfamily D, polypeptide 1
Medtr3g087080	4.47748	2.00542	2.23268	0.0255698	0.0497075
Medtr1g057640	4.47498	1.99237	2.24606	0.0247005	0.0481958
Medtr5g090830	4.46575	1.08201	4.12728	3.67074e-05	0.000112681	PF02458(Transferase family)	AT1G32910	HXXXD-type acyl-transferase family protein
Medtr5g090910	4.46244	0.360616	12.3745	3.59112e-35	6.1516e-34	PF00043(Glutathione S-transferase, C-terminal domain)	AT2G30860	glutathione S-transferase PHI 9
Medtr6g078290	4.45466	0.544078	8.18754	2.66616e-16	1.93324e-15	PF00197(Trypsin and protease inhibitor)	AT1G17860	Kunitz family trypsin and protease inhibitor protein
Medtr1g116890	4.44892	0.718408	6.19275	5.91235e-10	2.80583e-09	PF00067(Cytochrome P450)	AT3G52970	cytochrome P450, family 76, subfamily G, polypeptide 1
MT4Noble_049539	4.44829	1.42698	3.11728	0.00182526	0.00444758
Medtr2g064950	4.44486	1.45676	3.05119	0.00227938	0.00546385		AT4G12560	F-box and associated interaction domains-containing protein
Medtr1g108990	4.44285	0.288377	15.4064	1.48282e-53	4.66491e-52	PF01554(MatE)	AT1G71140	MATE efflux family protein
Medtr7g446220	4.434	0.546149	8.11867	4.71326e-16	3.36897e-15
Medtr5g010640	4.43178	0.518498	8.54733	1.25968e-17	9.84718e-17	PF00314(Thaumatin family)	AT4G11650	osmotin 34
Medtr3g088855	4.41514	0.719808	6.13377	8.58201e-10	4.02736e-09	PF00069(Protein kinase domain)	AT5G56790	Protein kinase superfamily protein
Medtr2g075530	4.41309	1.78325	2.47475	0.0133329	0.0276115
Medtr7g110790	4.39098	1.86776	2.35093	0.0187263	0.0374716	PF02309(AUX/IAA family)	AT2G46990	indole-3-acetic acid inducible 20
Medtr2g024030	4.3878	0.604522	7.25829	3.92018e-13	2.32628e-12	PF04885(Stigma-specific protein, Stig1)	AT1G11925	Stigma-specific Stig1 family protein
Medtr4g010320	4.3836	1.40308	3.12428	0.00178242	0.00435035	PF00011(Hsp20/alpha crystallin family)	AT1G52560	HSP20-like chaperones superfamily protein
Medtr6g005310	4.37781	1.45063	3.01788	0.00254554	0.00604463	PF00190(Cupin)	AT5G39120	RmlC-like cupins superfamily protein
Medtr8g087810	4.37399	1.39062	3.14536	0.00165884	0.00406716	PF00854(POT family)	AT1G59740	Major facilitator superfamily protein
Medtr5g072930	4.37279	0.198102	22.0734	5.69644e-108	6.46797e-106	PF00067(Cytochrome P450)	AT4G31500	cytochrome P450, family 83, subfamily B, polypeptide 1
Medtr2g024260	4.3677	1.53286	2.84939	0.00438035	0.00998936		AT3G21630	chitin elicitor receptor kinase 1
Medtr4g081870	4.3673	0.206319	21.1676	1.89821e-99	1.88139e-97	PF02365(No apical meristem (NAM) protein)	AT1G69490	NAC-like, activated by AP3/PI
Medtr7g087100	4.36724	0.609494	7.16536	7.75836e-13	4.52775e-12	PF03016(Exostosin family)	AT3G45400	exostosin family protein
Medtr3g079190	4.3665	1.39098	3.13916	0.00169434	0.00414698	PF04734(Neutral/alkaline non-lysosomal ceramidase, N-terminal)	AT2G38010	Neutral/alkaline non-lysosomal ceramidase
Medtr4g032885	4.35515	1.41844	3.07038	0.0021379	0.00515136	PF03126(Plus-3 domain)	AT1G61040	plus-3 domain-containing protein
Medtr1g096750	4.35151	1.35725	3.20613	0.00134532	0.00334439
Medtr1g087380	4.34768	1.90088	2.2872	0.0221841	0.0437555	PF04091(Exocyst complex subunit Sec15-like )	AT3G56640	exocyst complex component sec15A
MT4Noble_021608	4.34485	1.61936	2.68306	0.00729508	0.0159397
Medtr0113s0040	4.3438	0.311715	13.9352	3.87341e-44	9.19779e-43	PF00646(F-box domain)	AT3G61060	phloem protein 2-A13
Medtr7g084760	4.34123	0.778742	5.57466	2.48009e-08	1.04001e-07	PF00722(Glycosyl hydrolases family 16), PF06955(Xyloglucan endo-transglycosylase (XET) C-terminus)	AT5G13870	xyloglucan endotransglucosylase/hydrolase 5
Medtr4g086710	4.34005	1.43094	3.033	0.00242132	0.00577698	PF02298(Plastocyanin-like domain)	AT2G15780	Cupredoxin superfamily protein
Medtr7g111450	4.33674	0.366922	11.8193	3.10435e-32	4.72751e-31	PF01679(Proteolipid membrane potential modulator)	AT3G05890	Low temperature and salt responsive protein family
Medtr4g102220	4.33462	0.231803	18.6996	4.98803e-78	3.0291e-76	PF07279(Protein of unknown function (DUF1442))	AT2G45360	Protein of unknown function (DUF1442)
Medtr8g093440	4.33311	0.283711	15.2729	1.15813e-52	3.55292e-51	PF04720(PDDEXK-like family of unknown function)	AT2G38820	Protein of unknown function (DUF506)
Medtr2g075540	4.32308	0.51383	8.41346	3.98104e-17	3.02198e-16
Medtr5g071170	4.3158	0.805994	5.35464	8.5728e-08	3.42392e-07	PF00487(Fatty acid desaturase), PF11960(Domain of unknown function (DUF3474))	AT3G11170	fatty acid desaturase 7
Medtr5g087760	4.31177	0.607161	7.10152	1.23396e-12	7.12832e-12	PF03168(Late embryogenesis abundant protein)	AT2G27080	Late embryogenesis abundant (LEA) hydroxyproline-rich glycoprotein family
Medtr4g131920	4.30159	0.422507	10.1811	2.40792e-24	2.65175e-23		AT1G22710	sucrose-proton symporter 2
Medtr7g055660	4.28765	0.508293	8.43539	3.3009e-17	2.52314e-16	PF00856(SET domain)	AT4G02020	SET domain-containing protein
Medtr5g024670	4.28476	1.78939	2.39454	0.0166411	0.0336857
Medtr2g078790	4.27029	0.582186	7.33492	2.21846e-13	1.33844e-12
Medtr3g118380	4.26572	1.42789	2.98743	0.00281333	0.00663164
Medtr5g018610	4.26385	0.338006	12.6147	1.75166e-36	3.12526e-35
Medtr4g128400	4.26016	1.48154	2.87548	0.00403408	0.00924951	PF06955(Xyloglucan endo-transglycosylase (XET) C-terminus), PF00722(Glycosyl hydrolases family 16)	AT4G25810	xyloglucan endotransglycosylase 6
Medtr3g110595	4.25196	0.483301	8.79775	1.3959e-18	1.14846e-17
Medtr5g065520	4.24848	1.58512	2.68022	0.00735737	0.0160627	PF05691(Raffinose synthase or seed imbibition protein Sip1)	AT3G57520	seed imbibition 2
Medtr4g085890	4.24813	0.168121	25.2683	7.11964e-141	1.48585e-138	PF01039(Carboxyl transferase domain)	AT4G34030	3-methylcrotonyl-CoA carboxylase
Medtr1g019480	4.24714	0.362103	11.7291	9.04307e-32	1.35349e-30	PF00128(Alpha amylase, catalytic domain), PF07821(Alpha-amylase C-terminal beta-sheet domain)	AT4G25000	alpha-amylase-like
Medtr5g011750	4.24369	1.46058	2.90548	0.00366689	0.00847778		AT2G27830
Medtr1g040420	4.24345	1.45767	2.91111	0.00360146	0.00833627		AT4G23460	Adaptin family protein
Medtr2g062770	4.24149	0.104236	40.691	0	0	PF00117(Glutamine amidotransferase class-I), PF06418(CTP synthase N-terminus)	AT3G12670	CTP synthase family protein
Medtr2g087460	4.22987	1.55346	2.72286	0.00647195	0.0143025	PF11250(Fantastic Four meristem regulator)	AT5G22090	Protein of unknown function (DUF3049)
Medtr5g012860	4.22431	0.824406	5.12406	2.99023e-07	1.13333e-06
Medtr7g074865	4.22382	0.46146	9.15316	5.52933e-20	4.91192e-19	PF01370(NAD dependent epimerase/dehydratase family)	AT4G35420	dihydroflavonol 4-reductase-like1
Medtr6g007767	4.2223	0.647535	6.52057	7.0039e-11	3.56388e-10	PF03098(Animal haem peroxidase)	AT3G01420	Peroxidase superfamily protein
Medtr2g023710	4.21948	0.789223	5.34638	8.97322e-08	3.57662e-07		AT4G22030	F-box family protein with a domain of unknown function (DUF295)
Medtr3g016290	4.216	0.450553	9.35739	8.17316e-21	7.59284e-20
Medtr4g118590	4.21558	0.637547	6.61219	3.78678e-11	1.96534e-10	PF01156(Inosine-uridine preferring nucleoside hydrolase)	AT5G18860	inosine-uridine preferring nucleoside hydrolase family protein
Medtr7g114200	4.21192	0.276749	15.2193	2.63385e-52	7.99734e-51		AT1G71080	RNA polymerase II transcription elongation factor
Medtr7g053200	4.2117	0.628621	6.69991	2.08551e-11	1.10364e-10	PF00069(Protein kinase domain)	AT3G25250	AGC (cAMP-dependent, cGMP-dependent and protein kinase C) kinase family protein
Medtr8g007435	4.20825	1.19581	3.51918	0.000432885	0.00115938
Medtr3g118390	4.20479	0.319941	13.1424	1.88204e-39	3.73822e-38	PF00187(Chitin recognition protein), PF00182(Chitinase class I)	AT3G12500	basic chitinase
Medtr1g100355	4.19979	1.33444	3.14723	0.00164826	0.00404257
Medtr1g029150	4.19792	0.477021	8.8003	1.36453e-18	1.12328e-17	PF03405(Fatty acid desaturase)	AT1G43800	Plant stearoyl-acyl-carrier-protein desaturase family protein
Medtr4g058760	4.19747	0.706053	5.94497	2.76509e-09	1.24952e-08	PF00535(Glycosyl transferase family 2)	AT5G60700	glycosyltransferase family protein 2
Medtr2g103480	4.19744	1.4076	2.98197	0.00286399	0.00674622
Medtr7g076770	4.19631	1.37396	3.05418	0.0022568	0.00541314
Medtr1g040500	4.19499	0.491151	8.54116	1.32884e-17	1.03741e-16	PF01553(Acyltransferase)	AT2G38110	glycerol-3-phosphate acyltransferase 6
Medtr4g006650	4.19292	0.68436	6.12678	8.96781e-10	4.19977e-09	PF00403(Heavy-metal-associated domain), PF00230(Major intrinsic protein)	AT1G80760	NOD26-like intrinsic protein 6;1
Medtr8g068265	4.18502	0.302528	13.8335	1.60058e-43	3.71442e-42	PF02779(Transketolase, pyrimidine binding domain), PF02780(Transketolase, C-terminal domain), PF00676(Dehydrogenase E1 component)	AT4G15560	Deoxyxylulose-5-phosphate synthase
Medtr1g107395	4.18104	0.775886	5.38873	7.0958e-08	2.85712e-07
Medtr8g036105	4.18052	1.36522	3.06215	0.00219755	0.00528392	PF03195(Protein of unknown function DUF260)	AT4G00210	LOB domain-containing protein 31
Medtr4g099320	4.17732	0.110248	37.8901	0	0	PF02812(Glu/Leu/Phe/Val dehydrogenase, dimerisation domain), PF00208(Glutamate/Leucine/Phenylalanine/Valine dehydrogenase)	AT5G07440	glutamate dehydrogenase 2
Medtr1g023270	4.17591	1.55353	2.68802	0.00718773	0.0157237		AT1G75550	glycine-rich protein
Medtr8g078240	4.17532	1.50418	2.77582	0.00550629	0.0123275	PF01501(Glycosyl transferase family 8)	AT3G50760	galacturonosyltransferase-like 2
Medtr8g015250	4.17157	1.74005	2.39739	0.0165124	0.0334527	PF00170(bZIP transcription factor)	AT3G30530	basic leucine-zipper 42
Medtr3g051460	4.16873	0.275282	15.1435	8.3641e-52	2.49617e-50	PF01625(Peptide methionine sulfoxide reductase)	AT5G61640	peptidemethionine sulfoxide reductase 1
MT4Noble_056922	4.16795	1.43761	2.89922	0.00374087	0.00862931
MT4Noble_056923	4.16795	1.43761	2.89922	0.00374087	0.00862931
Medtr4g081530	4.16387	0.445214	9.35251	8.55958e-21	7.94186e-20	PF00232(Glycosyl hydrolase family 1)	AT5G54570	beta glucosidase 41
Medtr2g089835	4.16053	0.913199	4.55599	5.214e-06	1.75189e-05	PF12609(Wound-induced protein)	AT4G10270	Wound-responsive family protein
Medtr1g071610	4.15858	0.10961	37.9397	0	0	PF02785(Biotin carboxylase C-terminal domain), PF00289(Carbamoyl-phosphate synthase L chain, N-terminal domain), PF00364(Biotin-requiring enzyme), PF02786(Carbamoyl-phosphate synthase L chain, ATP binding domain)	AT1G03090	methylcrotonyl-CoA carboxylase alpha chain, mitochondrial / 3-methylcrotonyl-CoA carboxylase 1 (MCCA)
Medtr7g072420	4.15837	0.322364	12.8996	4.52323e-38	8.51627e-37	PF00202(Aminotransferase class-III)	AT3G08860	PYRIMIDINE 4
Medtr4g129290	4.15798	1.33436	3.11608	0.00183273	0.00446543
Medtr1g069070	4.15461	1.52469	2.72488	0.00643247	0.0142216
Medtr1157s0010	4.15447	1.15309	3.6029	0.000314689	0.000858571		AT5G13750	zinc induced facilitator-like 1
Medtr4g026050	4.13863	0.377991	10.949	6.71839e-28	8.67158e-27	PF00067(Cytochrome P450)	AT4G31500	cytochrome P450, family 83, subfamily B, polypeptide 1
Medtr4g021470	4.13614	0.135612	30.4998	2.62521e-204	1.6208e-201	PF02780(Transketolase, C-terminal domain), PF02779(Transketolase, pyrimidine binding domain)	AT1G55510	branched-chain alpha-keto acid decarboxylase E1 beta subunit
Medtr3g111790	4.12845	1.38097	2.98953	0.00279408	0.0065893	PF04788(Protein of unknown function (DUF620))	AT1G75160	Protein of unknown function (DUF620)
Medtr5g095200	4.11562	0.815364	5.04758	4.47432e-07	1.67146e-06	PF00560(Leucine Rich Repeat)	AT3G11010	receptor like protein 34
Medtr4g066250	4.11552	1.61516	2.54806	0.0108324	0.0228662
Medtr8g035680	4.11112	1.52474	2.69628	0.00701189	0.0153787	PF00067(Cytochrome P450)	AT2G45510	cytochrome P450, family 704, subfamily A, polypeptide 2
Medtr3g115210	4.10646	0.29673	13.8391	1.48127e-43	3.44293e-42		AT1G42430
Medtr6g087150	4.1009	0.380243	10.7849	4.05502e-27	5.04707e-26	PF00097(Zinc finger, C3HC4 type (RING finger))	AT2G20030	RING/U-box superfamily protein
MT4Noble_011865	4.10063	0.275099	14.906	3.01173e-50	8.59852e-49
MT4Noble_026712	4.09954	0.386671	10.6021	2.91213e-26	3.50959e-25
Medtr3g094120	4.09653	1.23127	3.32708	0.0008776	0.00224185
Medtr1g017840	4.09562	0.900087	4.55025	5.35825e-06	1.79832e-05		AT2G04420	Polynucleotidyl transferase, ribonuclease H-like superfamily protein
Medtr3g105340	4.09487	0.225876	18.1288	1.88669e-73	1.00924e-71	PF07911(Protein of unknown function (DUF1677))	AT1G72510	Protein of unknown function (DUF1677)
Medtr4g124470	4.08661	0.205487	19.8874	5.22994e-88	4.02569e-86	PF04455(LOR/SDH bifunctional enzyme conserved region ), PF05222(Alanine dehydrogenase/PNT, N-terminal domain), PF03435(Saccharopine dehydrogenase NADP binding domain), PF01262(Alanine dehydrogenase/PNT, C-terminal domain)	AT4G33150	lysine-ketoglutarate reductase/saccharopine dehydrogenase bifunctional enzyme
Medtr5g078020	4.08509	0.745499	5.47967	4.26121e-08	1.75341e-07	PF00293(NUDIX domain)	AT2G01670	nudix hydrolase homolog 17
Medtr8g079010	4.0825	1.41667	2.88175	0.00395472	0.00907949	PF00503(G-protein alpha subunit)	AT2G23460	extra-large G-protein 1
Medtr1g055325	4.08125	1.14813	3.5547	0.00037841	0.00102086	PF00067(Cytochrome P450)	AT2G45550	cytochrome P450, family 76, subfamily C, polypeptide 4
Medtr3g096950	4.06387	1.4211	2.85967	0.00424085	0.00969169	PF04782(Protein of unknown function (DUF632)), PF04783(Protein of unknown function (DUF630))	AT1G21740	Protein of unknown function (DUF630 and DUF632)
Medtr8g036130	4.062	0.761983	5.33083	9.77668e-08	3.88172e-07	PF00319(SRF-type transcription factor (DNA-binding and dimerisation domain))	AT5G48670	AGAMOUS-like 80
Medtr2g073220	4.06054	1.53138	2.65155	0.00801239	0.0173763
Medtr3g013530	4.05481	1.48044	2.73892	0.00616423	0.0136744		AT2G22120	RING/FYVE/PHD zinc finger superfamily protein
Medtr4g082365	4.05449	0.944142	4.29436	1.75195e-05	5.57191e-05		AT3G11810
MT4Noble_043127	4.05201	1.31797	3.07443	0.00210904	0.00508597
Medtr1g089000	4.04939	1.34997	2.99961	0.00270328	0.00639309		AT3G62990
Medtr2g038625	4.04819	0.564367	7.17296	7.33917e-13	4.29156e-12	PF00046(Homeobox domain), PF02183(Homeobox associated leucine zipper)	AT4G17460	Homeobox-leucine zipper protein 4 (HB-4) / HD-ZIP protein
Medtr6g093100	4.04756	1.3779	2.93749	0.00330882	0.00771373	PF00432(Prenyltransferase and squalene oxidase repeat)	AT2G07050	cycloartenol synthase 1
Medtr7g114020	4.04106	0.3146	12.8451	9.16507e-38	1.70715e-36	PF01627(Hpt domain)	AT1G03430	histidine-containing phosphotransfer factor 5
Medtr2g089450	4.03974	1.50819	2.67853	0.00739464	0.0161382	PF00249(Myb-like DNA-binding domain)	AT4G21440	MYB-like 102
Medtr1g082320	4.03958	1.30728	3.09006	0.00200114	0.00484469	PF11250(Fantastic Four meristem regulator)	AT1G54740	Protein of unknown function (DUF3049)
Medtr2g023820	4.03365	0.838605	4.80995	1.5097e-06	5.35872e-06		AT4G22030	F-box family protein with a domain of unknown function (DUF295)
Medtr7g085990	4.02493	0.330668	12.1721	4.37556e-34	7.21188e-33	PF02458(Transferase family)	AT2G19070	spermidine hydroxycinnamoyl transferase
MT4Noble_022950	4.0236	0.35104	11.4619	2.04861e-30	2.92159e-29
Medtr4g087970	4.02267	0.804804	4.99833	5.78299e-07	2.1401e-06	PF01095(Pectinesterase), PF04043(Plant invertase/pectin methylesterase inhibitor)	AT3G43270	Plant invertase/pectin methylesterase inhibitor superfamily
Medtr4g029170	4.01935	1.64062	2.44989	0.0142899	0.0293595	PF00141(Peroxidase)	AT5G05340	Peroxidase superfamily protein
Medtr7g096410	4.01422	0.632136	6.35025	2.14966e-10	1.05315e-09
Medtr7g114190	4.01367	1.78381	2.25005	0.0244455	0.0477675	PF01487(Type I 3-dehydroquinase)	AT3G06350	dehydroquinate dehydratase, putative / shikimate dehydrogenase, putative
MT4Noble_024100	4.0106	1.63298	2.456	0.0140494	0.0289115
Medtr3g048300	4.00753	0.291279	13.7584	4.53452e-43	1.02961e-41	PF04450(Peptidase of plants and bacteria)	AT2G42900	Plant basic secretory protein (BSP) family protein
Medtr1g113730	4.00402	1.54704	2.58819	0.00964815	0.0205848		AT5G35810	Ankyrin repeat family protein
Medtr3g081640	4.00108	1.27494	3.13826	0.00169956	0.0041577	PF02535(ZIP Zinc transporter)	AT3G12750	zinc transporter 1 precursor
Medtr3g111730	4.00041	0.147372	27.145	2.90292e-162	9.35088e-160		AT1G45150
Medtr4g093530	3.99797	1.17018	3.41654	0.000634228	0.00165642
Medtr3g013500	3.99744	0.673229	5.93771	2.89029e-09	1.30292e-08	PF00685(Sulfotransferase domain)	AT5G07010	sulfotransferase 2A
Medtr4g072910	3.99494	0.773982	5.16154	2.44921e-07	9.34859e-07	PF02519(Auxin responsive protein)	AT4G34770	SAUR-like auxin-responsive protein family
Medtr1g090450	3.99366	1.76855	2.25815	0.0239363	0.0468872	PF00097(Zinc finger, C3HC4 type (RING finger))	AT5G06490	RING/U-box superfamily protein
Medtr5g096820	3.99084	0.225872	17.6685	7.32703e-70	3.55961e-68	PF05691(Raffinose synthase or seed imbibition protein Sip1)	AT1G55740	seed imbibition 1
Medtr2g013010	3.98745	0.571361	6.97885	2.976e-12	1.67637e-11	PF12143(Protein of unknown function (DUF_B2219)), PF00264(Common central domain of tyrosinase), PF12142(Polyphenol oxidase middle domain)
Medtr1g071450	3.98401	1.48002	2.69185	0.00710565	0.0155567	PF05703(Auxin canalisation), PF08458(Plant pleckstrin homology-like region)	AT3G22810	Plant protein of unknown function (DUF828) with plant pleckstrin homology-like region
Medtr4g127680	3.98056	0.338333	11.7652	5.89608e-32	8.89212e-31		AT5G57340
Medtr4g086740	3.978	0.423221	9.39935	5.49038e-21	5.12949e-20	PF02298(Plastocyanin-like domain)	AT2G15780	Cupredoxin superfamily protein
Medtr1g110570	3.97442	0.575311	6.9083	4.90489e-12	2.72765e-11	PF05678(VQ motif)	AT1G68450	VQ motif-containing protein
Medtr4g089115	3.97176	0.760157	5.22492	1.74229e-07	6.75028e-07	PF01582(TIR domain)	AT1G61105	Toll-Interleukin-Resistance (TIR) domain family protein
Medtr4g097540	3.96663	1.65228	2.4007	0.0163638	0.0331863	PF00155(Aminotransferase class I and II)	AT4G37770	1-amino-cyclopropane-1-carboxylate synthase 8
Medtr2g073190	3.96503	0.275345	14.4002	5.1579e-47	1.35269e-45	PF01758(Sodium Bile acid symporter family), PF03083(Sugar efflux transporter for intercellular exchange)	AT1G78560	Sodium Bile acid symporter family
MT4Noble_027449	3.95905	0.901037	4.39388	1.11344e-05	3.6157e-05
Medtr7g068550	3.95664	0.380076	10.4101	2.2289e-25	2.56818e-24	PF00657(GDSL-like Lipase/Acylhydrolase)	AT3G11210	SGNH hydrolase-type esterase superfamily protein
Medtr3g045840	3.95232	1.76982	2.23317	0.0255376	0.049656	PF12171(Zinc-finger double-stranded RNA-binding)	AT2G19380	RNA recognition motif (RRM)-containing protein
Medtr2g013780	3.95138	0.241711	16.3475	4.52882e-60	1.67765e-58	PF04720(PDDEXK-like family of unknown function)	AT4G32480	Protein of unknown function (DUF506)
Medtr2g025780	3.95003	0.188713	20.9314	2.77214e-97	2.56726e-95
Medtr7g053103	3.9493	0.243948	16.1891	6.02157e-59	2.17092e-57		AT3G19510	Homeodomain-like protein with RING/FYVE/PHD-type zinc finger domain
Medtr5g045770	3.94331	0.314959	12.5201	5.79815e-36	1.01374e-34	PF00067(Cytochrome P450)	AT4G31500	cytochrome P450, family 83, subfamily B, polypeptide 1
Medtr2g035130	3.94306	0.425242	9.27251	1.81815e-20	1.65838e-19	PF00407(Pathogenesis-related protein Bet v I family)
MT4Noble_020366	3.94195	0.471585	8.35892	6.32937e-17	4.75344e-16
Medtr5g062370	3.92974	0.20464	19.2032	3.47718e-82	2.32086e-80	PF01915(Glycosyl hydrolase family 3 C-terminal domain), PF00933(Glycosyl hydrolase family 3 N terminal domain)	AT1G78060	Glycosyl hydrolase family protein
Medtr4g019710	3.92834	0.586221	6.70112	2.06824e-11	1.09529e-10		AT5G02020
Medtr5g035580	3.92537	0.699301	5.61328	1.98528e-08	8.38565e-08	PF00201(UDP-glucoronosyl and UDP-glucosyl transferase)	AT1G24100	UDP-glucosyl transferase 74B1
Medtr1g019240	3.91231	1.38699	2.82071	0.0047917	0.0108324	PF00010(Helix-loop-helix DNA-binding domain)	AT4G36930	basic helix-loop-helix (bHLH) DNA-binding superfamily protein
Medtr1g004990	3.91091	0.435913	8.97177	2.91785e-19	2.49267e-18	PF00069(Protein kinase domain)	AT4G28880	casein kinase I-like 3
Medtr7g085930	3.90996	0.250541	15.6061	6.61857e-55	2.13429e-53	PF02458(Transferase family)	AT2G19070	spermidine hydroxycinnamoyl transferase
Medtr4g013250	3.90744	1.50673	2.59333	0.00950517	0.0203002
Medtr3g084990	3.89688	0.286079	13.6217	2.97619e-42	6.56735e-41		AT1G27290
Medtr3g118370	3.89518	0.90782	4.29069	1.78116e-05	5.65692e-05
Medtr2g038580	3.89422	0.552528	7.048	1.81507e-12	1.03721e-11	PF02183(Homeobox associated leucine zipper), PF00046(Homeobox domain)	AT4G17460	Homeobox-leucine zipper protein 4 (HB-4) / HD-ZIP protein
Medtr2g031750	3.89153	0.973172	3.99881	6.36616e-05	0.000189857	PF01490(Transmembrane amino acid transporter protein)	AT1G58360	amino acid permease 1
Medtr8g078960	3.88282	0.574358	6.76028	1.37722e-11	7.41667e-11
Medtr7g009780	3.88069	0.327481	11.8501	2.14907e-32	3.28796e-31	PF01011(PQQ enzyme repeat), PF10527()
Medtr8g080570	3.88068	1.50223	2.58329	0.00978637	0.0208497	PF05755(Rubber elongation factor protein (REF))	AT1G67360	Rubber elongation factor protein (REF)
Medtr2g078580	3.87671	1.1731	3.30466	0.000950907	0.0024162		AT1G30330	auxin response factor 6
Medtr5g014930	3.87028	1.72084	2.24906	0.0245086	0.0478655
Medtr2g090755	3.86177	0.323434	11.9399	7.3313e-33	1.14772e-31	PF00462(Glutaredoxin)	AT1G28480	Thioredoxin superfamily protein
Medtr6g079430	3.8617	1.55018	2.49113	0.0127338	0.0265079	PF01535(PPR repeat)	AT1G62670	rna processing factor 2
Medtr3g075510	3.85909	0.18514	20.8442	1.72169e-96	1.57476e-94	PF05691(Raffinose synthase or seed imbibition protein Sip1)	AT3G57520	seed imbibition 2
Medtr4g090525	3.8587	0.218617	17.6505	1.00799e-69	4.88901e-68	PF00459(Inositol monophosphatase family)	AT5G54390	HAL2-like
Medtr7g074870	3.85522	0.25473	15.1345	9.58555e-52	2.85495e-50	PF01370(NAD dependent epimerase/dehydratase family)	AT2G45400	NAD(P)-binding Rossmann-fold superfamily protein
Medtr2g021690	3.85464	0.316577	12.176	4.17203e-34	6.88791e-33	PF04819(Family of unknown function (DUF716) )	AT1G55230	Family of unknown function (DUF716)
Medtr4g124440	3.8539	1.3055	2.95204	0.00315679	0.00738254	PF00332(Glycosyl hydrolases family 17), PF07983(X8 domain)	AT5G20870	O-Glycosyl hydrolases family 17 protein
Medtr3g117850	3.8532	0.68412	5.63235	1.77774e-08	7.53158e-08	PF00069(Protein kinase domain)	AT4G35030	Protein kinase superfamily protein
Medtr1g105980	3.84936	0.981686	3.92117	8.8119e-05	0.000258606	PF01490(Transmembrane amino acid transporter protein)	AT1G58360	amino acid permease 1
Medtr2g435310	3.848	1.36953	2.80972	0.00495846	0.0111872	PF00407(Pathogenesis-related protein Bet v I family)	AT1G24020	MLP-like protein 423
Medtr7g101250	3.8477	0.219683	17.5148	1.10397e-68	5.22623e-67	PF04520(Senescence regulator)	AT5G03230	Protein of unknown function, DUF584
Medtr3g106290	3.84406	1.43883	2.67166	0.00754782	0.0164434	PF00847(AP2 domain)	AT5G25190	Integrase-type DNA-binding superfamily protein
Medtr7g406880	3.84402	0.465533	8.25723	1.49092e-16	1.09555e-15	PF07859(alpha/beta hydrolase fold)	AT5G16080	carboxyesterase 17
Medtr1g095740	3.84319	1.02932	3.73372	0.000188672	0.000529378	PF00612(IQ calmodulin-binding motif)	AT5G03040	IQ-domain 2
Medtr5g049280	3.84301	1.57327	2.4427	0.014578	0.0298852	PF00141(Peroxidase)	AT1G68850	Peroxidase superfamily protein
Medtr2g010730	3.84251	1.70457	2.25424	0.0241812	0.0473196	PF01657(Salt stress response/antifungal)	AT4G23160	cysteine-rich RLK (RECEPTOR-like protein kinase) 8
Medtr8g467000	3.84196	0.38597	9.95404	2.42146e-23	2.53658e-22	PF03321(GH3 auxin-responsive promoter)	AT5G54510	Auxin-responsive GH3 family protein
Medtr3g467290	3.83699	0.747106	5.13581	2.80939e-07	1.06714e-06	PF00067(Cytochrome P450)	AT4G39950	cytochrome P450, family 79, subfamily B, polypeptide 2
Medtr5g035400	3.83689	0.642229	5.97433	2.31043e-09	1.04967e-08
Medtr4g072750	3.83426	1.40276	2.73337	0.00626896	0.013887	PF02519(Auxin responsive protein)	AT4G38840	SAUR-like auxin-responsive protein family
Medtr6g090060	3.82788	1.13555	3.37096	0.000749074	0.00193606	PF06219(Protein of unknown function (DUF1005))	AT4G29310	Protein of unknown function (DUF1005)
Medtr6g016820	3.82588	0.221857	17.2448	1.22467e-66	5.49893e-65	PF03639(Glycosyl hydrolase family 81 )	AT5G15870	glycosyl hydrolase family 81 protein
Medtr4g051515	3.82309	0.483032	7.91478	2.47686e-15	1.68778e-14	PF04564(U-box domain)	AT3G11840	plant U-box 24
Medtr8g032290	3.82188	1.61836	2.36158	0.0181972	0.0365338
Medtr5g004800	3.8211	0.35242	10.8425	2.16591e-27	2.73717e-26	PF00168(C2 domain)	AT4G34150	Calcium-dependent lipid-binding (CaLB domain) family protein
Medtr2g031520	3.80825	0.453996	8.38828	4.93324e-17	3.72855e-16	PF00069(Protein kinase domain)	AT1G16260	Wall-associated kinase family protein
Medtr5g085280	3.80682	1.50243	2.53378	0.0112839	0.023738
Medtr5g078500	3.80487	1.56826	2.42617	0.015259	0.0311454
Medtr7g096360	3.80451	0.60207	6.31904	2.63195e-10	1.28138e-09
Medtr3g465510	3.80437	0.798649	4.7635	1.90261e-06	6.69086e-06	PF01490(Transmembrane amino acid transporter protein)	AT3G28960	Transmembrane amino acid transporter family protein
Medtr2g100470	3.80336	1.39897	2.71868	0.00655422	0.0144703	PF00069(Protein kinase domain)	AT4G29990	Leucine-rich repeat transmembrane protein kinase protein
Medtr5g076060	3.80238	0.204358	18.6064	2.84951e-77	1.68554e-75	PF04678(Mitochondrial calcium uniporter)	AT1G57610	Protein of unknown function (DUF607)
MT4Noble_020397	3.80175	1.55382	2.44671	0.0144166	0.0295849
Medtr4g069070	3.79481	1.14464	3.3153	0.00091546	0.00233173	PF02401(LytB protein)	AT4G34350	4-hydroxy-3-methylbut-2-enyl diphosphate reductase
Medtr4g112025	3.78825	0.672861	5.63007	1.80137e-08	7.62622e-08	PF00332(Glycosyl hydrolases family 17), PF07983(X8 domain)	AT3G24330	O-Glycosyl hydrolases family 17 protein
Medtr2g034720	3.78618	0.237656	15.9314	3.83792e-57	1.3164e-55	PF00933(Glycosyl hydrolase family 3 N terminal domain), PF01915(Glycosyl hydrolase family 3 C-terminal domain)	AT5G49360	beta-xylosidase 1
Medtr4g120220	3.78357	0.187273	20.2035	9.12623e-91	7.55246e-89	PF00198(2-oxoacid dehydrogenases acyltransferase (catalytic domain)), PF00364(Biotin-requiring enzyme), PF02817(e3 binding domain)	AT3G06850	2-oxoacid dehydrogenases acyltransferase family protein
Medtr5g038460	3.78189	0.317056	11.9282	8.44238e-33	1.31679e-31		AT1G07040
Medtr2g022760	3.77202	0.202453	18.6316	1.78186e-77	1.06249e-75	PF00232(Glycosyl hydrolase family 1)	AT1G61820	beta glucosidase 46
Medtr1g012620	3.76929	0.196686	19.1641	7.38822e-82	4.86555e-80		AT4G32190	Myosin heavy chain-related protein
Medtr8g016230	3.75857	0.303764	12.3733	3.64471e-35	6.2326e-34	PF02140(Galactose binding lectin domain), PF01301(Glycosyl hydrolases family 35)	AT3G13750	beta galactosidase 1
Medtr4g107940	3.75467	0.150946	24.8743	1.41318e-136	2.81072e-134	PF00171(Aldehyde dehydrogenase family)	AT5G62530	aldehyde dehydrogenase 12A1
Medtr3g498715	3.7528	0.431171	8.70375	3.21101e-18	2.59712e-17	PF00999(Sodium/hydrogen exchanger family)	AT3G44900	cation/H exchanger 4
Medtr2g020240	3.75201	0.168119	22.3176	2.49128e-110	3.02578e-108	PF01373(Glycosyl hydrolase family 14)	AT5G18670	beta-amylase 3
Medtr4g014070	3.75108	1.1085	3.38393	0.000714569	0.00185269	PF00069(Protein kinase domain), PF00560(Leucine Rich Repeat), PF08263(Leucine rich repeat N-terminal domain)	AT3G51740	inflorescence meristem receptor-like kinase 2
Medtr1g068810	3.74709	0.164683	22.7533	1.33011e-114	1.71382e-112	PF00719(Inorganic pyrophosphatase)	AT3G53620	pyrophosphorylase 4
Medtr2g018890	3.74698	1.34491	2.78605	0.00533554	0.0119742		AT4G03620	myosin heavy chain-related
Medtr1g067170	3.74616	0.534236	7.01217	2.34645e-12	1.32932e-11		AT5G02790	Glutathione S-transferase family protein
Medtr3g071740	3.74497	0.599722	6.24451	4.25125e-10	2.03531e-09	PF10604(Polyketide cyclase / dehydrase and lipid transport)	AT2G40330	PYR1-like 6
Medtr1g009180	3.74434	0.58769	6.37129	1.87448e-10	9.22454e-10	PF09258(Glycosyl transferase family 64 domain)	AT1G80290	Nucleotide-diphospho-sugar transferases superfamily protein
Medtr4g007240	3.74125	1.03776	3.60512	0.00031201	0.000851889	PF00646(F-box domain)	AT4G22430	F-box family protein
Medtr1g116660	3.73908	1.25078	2.98941	0.00279519	0.00659099	PF00083(Sugar (and other) transporter)	AT2G43330	inositol transporter 1
Medtr1g025490	3.73659	0.325724	11.4716	1.83154e-30	2.61706e-29		AT1G75810
Medtr7g055630	3.73212	0.275239	13.5595	6.95842e-42	1.51293e-40		AT4G13266
Medtr8g086020	3.73163	0.238886	15.6209	5.24343e-55	1.7001e-53	PF00170(bZIP transcription factor)	AT1G75390	basic leucine-zipper 44
Medtr8g096880	3.73086	0.192007	19.4309	4.23274e-84	2.97951e-82	PF01370(NAD dependent epimerase/dehydratase family)	AT1G12780	UDP-D-glucose/UDP-D-galactose 4-epimerase 1
Medtr5g010635	3.72838	0.260817	14.295	2.35001e-46	6.04536e-45	PF00314(Thaumatin family)	AT4G11650	osmotin 34
Medtr7g079080	3.7208	0.362095	10.2757	9.06389e-25	1.01669e-23	PF00155(Aminotransferase class I and II)	AT3G61510	ACC synthase 1
Medtr2g027550	3.71535	0.657558	5.65023	1.60238e-08	6.81787e-08
Medtr2g078930	3.71205	0.387895	9.56973	1.07187e-21	1.03976e-20	PF01554(MatE)	AT3G23560	MATE efflux family protein
Medtr2g099140	3.70562	0.471634	7.85698	3.93504e-15	2.65215e-14		AT5G67550
Medtr4g046153	3.70165	0.83567	4.42956	9.44237e-06	3.08755e-05
Medtr1g039780	3.70153	1.53822	2.40638	0.0161115	0.0327187
Medtr5g018520	3.69995	0.756392	4.89157	1.00033e-06	3.61259e-06	PF00400(WD domain, G-beta repeat)	AT3G50390	Transducin/WD40 repeat-like superfamily protein
Medtr3g086890	3.69932	0.447012	8.27565	1.27761e-16	9.41838e-16		AT4G40020	Myosin heavy chain-related protein
Medtr4g021330	3.69799	0.507285	7.28976	3.10502e-13	1.85407e-12		AT2G37750
Medtr7g102890	3.6932	1.62723	2.26962	0.0232304	0.0456188		AT1G33710	RNA-directed DNA polymerase (reverse transcriptase)-related family protein
Medtr5g073020	3.69026	0.440494	8.37755	5.4043e-17	4.07523e-16	PF00067(Cytochrome P450)	AT4G31500	cytochrome P450, family 83, subfamily B, polypeptide 1
Medtr7g068500	3.68257	0.738838	4.98427	6.2196e-07	2.29308e-06	PF00657(GDSL-like Lipase/Acylhydrolase)	AT3G11210	SGNH hydrolase-type esterase superfamily protein
Medtr7g106420	3.68196	0.551158	6.6804	2.38295e-11	1.255e-10	PF00804(Syntaxin), PF05739(SNARE domain)	AT3G11820	syntaxin of plants 121
Medtr7g063490	3.67759	0.222011	16.5649	1.25081e-61	4.84547e-60		AT2G37750
Medtr5g091060	3.67701	0.169818	21.6526	5.74089e-104	6.0979e-102	PF00903(Glyoxalase/Bleomycin resistance protein/Dioxygenase superfamily)	AT1G06570	phytoene desaturation 1
Medtr5g091930	3.67319	0.259183	14.1722	1.36206e-45	3.39771e-44	PF00285(Citrate synthase)	AT3G58750	citrate synthase 2
Medtr4g085900	3.67059	0.10998	33.375	3.16489e-244	3.47376e-241	PF01965(DJ-1/PfpI family)	AT4G34020	Class I glutamine amidotransferase-like superfamily protein
Medtr7g094260	3.66594	0.392351	9.3435	9.31985e-21	8.62836e-20
MT4Noble_018324	3.66292	1.59001	2.3037	0.0212393	0.0420403
Medtr5g010730	3.66134	1.10641	3.3092	0.000935631	0.00237942	PF07714(Protein tyrosine kinase), PF00989(PAS fold)	AT4G23050	PAS domain-containing protein tyrosine kinase family protein
Medtr8g079120	3.6557	0.219783	16.6332	4.0042e-62	1.57799e-60	PF00561(alpha/beta hydrolase fold)	AT2G23620	methyl esterase 1
Medtr2g028580	3.65323	0.676313	5.40169	6.60168e-08	2.66613e-07	PF00069(Protein kinase domain)	AT5G49760	Leucine-rich repeat protein kinase family protein
Medtr1g019510	3.65298	1.05082	3.47631	0.000508369	0.00134839	PF00201(UDP-glucoronosyl and UDP-glucosyl transferase)	AT4G01070	UDP-Glycosyltransferase superfamily protein
Medtr3g114840	3.65259	0.303299	12.0429	2.11414e-33	3.40133e-32	PF00168(C2 domain), PF00614(Phospholipase D Active site motif)	AT4G35790	phospholipase D delta
Medtr4g094570	3.65169	0.629897	5.79728	6.7398e-09	2.94723e-08	PF07712(Stress up-regulated Nod 19)	AT5G61820
Medtr1g100773	3.65125	1.46769	2.48774	0.0128556	0.026739	PF01754(A20-like zinc finger), PF01428(AN1-like Zinc finger)	AT4G22820	A20/AN1-like zinc finger family protein
Medtr3g092150	3.65123	0.294759	12.3872	3.06666e-35	5.26538e-34	PF02183(Homeobox associated leucine zipper), PF00046(Homeobox domain)	AT2G46680	homeobox 7
Medtr6g088885	3.64902	1.37223	2.65919	0.00783277	0.0170275	PF00332(Glycosyl hydrolases family 17), PF07983(X8 domain)	AT5G56590	O-Glycosyl hydrolases family 17 protein
Medtr5g066060	3.64861	0.308801	11.8154	3.25054e-32	4.94505e-31	PF00484(Carbonic anhydrase)	AT4G33580	beta carbonic anhydrase 5
Medtr4g128840	3.64526	0.163586	22.2835	5.34396e-110	6.41167e-108	PF01261(Xylose isomerase-like TIM barrel)	AT5G57655	xylose isomerase family protein
Medtr2g019370	3.64384	0.547292	6.65795	2.77676e-11	1.45568e-10	PF03171(2OG-Fe(II) oxygenase superfamily)	AT1G30040	gibberellin 2-oxidase
Medtr4g072980	3.64203	1.59922	2.27738	0.0227635	0.0448058	PF02519(Auxin responsive protein)	AT4G34800	SAUR-like auxin-responsive protein family
Medtr1g073180	3.62945	0.199975	18.1495	1.2957e-73	6.98144e-72	PF00501(AMP-binding enzyme)	AT5G63380	AMP-dependent synthetase and ligase family protein
Medtr5g061740	3.62938	0.816081	4.44733	8.69434e-06	2.85587e-05	PF01486(K-box region), PF00319(SRF-type transcription factor (DNA-binding and dimerisation domain))	AT1G22130	AGAMOUS-like 104
Medtr1g116410	3.6172	1.49714	2.41608	0.0156887	0.0319564
Medtr4g072360	3.61193	0.824327	4.38168	1.17769e-05	3.81382e-05	PF00248(Aldo/keto reductase family)	AT1G59960	NAD(P)-linked oxidoreductase superfamily protein
MT4Noble_000351	3.60865	1.41963	2.54197	0.0110231	0.0232274
Medtr8g022130	3.60813	1.46762	2.45849	0.0139522	0.0287413	PF02705(K potassium transporter)	AT4G13420	high affinity K transporter 5
Medtr7g109590	3.60707	0.673628	5.3547	8.56991e-08	3.42323e-07		AT2G47360
Medtr8g072210	3.60656	0.367153	9.82303	8.96079e-23	9.15384e-22	PF00732(GMC oxidoreductase), PF05199(GMC oxidoreductase)	AT4G19380	Long-chain fatty alcohol dehydrogenase family protein
Medtr8g068390	3.6029	0.848514	4.24613	2.17499e-05	6.84971e-05	PF00069(Protein kinase domain)	AT5G65530	Protein kinase superfamily protein
Medtr5g064950	3.59966	1.50713	2.38842	0.0169208	0.0341866	PF00010(Helix-loop-helix DNA-binding domain)	AT1G72210	basic helix-loop-helix (bHLH) DNA-binding superfamily protein
Medtr5g016450	3.59692	0.244713	14.6985	6.59003e-49	1.82861e-47		AT4G37300	maternal effect embryo arrest 59
Medtr5g074290	3.59455	0.256439	14.0171	1.22448e-44	2.96465e-43		AT1G06980
Medtr5g095120	3.59426	0.36933	9.73183	2.20586e-22	2.21221e-21	PF00560(Leucine Rich Repeat), PF08263(Leucine rich repeat N-terminal domain)	AT1G45616	receptor like protein 6
Medtr1g070350	3.59125	0.44852	8.00688	1.17653e-15	8.20196e-15	PF04576(Zein-binding)	AT2G30690	Protein of unknown function, DUF593
Medtr1g033900	3.59101	1.25739	2.85593	0.00429116	0.00980181	PF07816(Protein of unknown function (DUF1645))	AT2G15760	Protein of unknown function (DUF1645)
Medtr0650s0010	3.58528	0.584844	6.13032	8.77029e-10	4.11116e-09	PF04525(LURP-one-related)	AT2G05910	Protein of unknown function (DUF567)
Medtr7g086030	3.5821	0.24	14.9254	2.25252e-50	6.47463e-49	PF01915(Glycosyl hydrolase family 3 C-terminal domain), PF00933(Glycosyl hydrolase family 3 N terminal domain)	AT5G20950	Glycosyl hydrolase family protein
Medtr7g104250	3.57603	0.358418	9.97727	1.91662e-23	2.01486e-22	PF01476(LysM domain)	AT3G52790	peptidoglycan-binding LysM domain-containing protein
Medtr1g114690	3.55948	0.269218	13.2216	6.58669e-40	1.32968e-38	PF02893(GRAM domain)	AT5G23370	GRAM domain-containing protein / ABA-responsive protein-related
Medtr4g087850	3.55899	1.00032	3.55785	0.000373907	0.00100927
Medtr2g072560	3.5564	0.937535	3.79335	0.000148626	0.000422618	PF00190(Cupin)	AT5G20630	germin 3
Medtr4g132000	3.55296	0.27214	13.0556	5.90215e-39	1.14771e-37
Medtr2g022780	3.54483	0.29727	11.9246	8.80875e-33	1.37105e-31	PF00962(Adenosine/AMP deaminase)	AT4G04880	adenosine/AMP deaminase family protein
Medtr3g008370	3.5392	1.4098	2.51043	0.0120584	0.0252134	PF00421(Photosystem II protein)	ATCG00280	photosystem II reaction center protein C
Medtr8g076320	3.53546	0.300627	11.7603	6.25203e-32	9.40502e-31
Medtr1g083580	3.53203	0.369535	9.55804	1.20006e-21	1.1604e-20	PF00646(F-box domain)	AT1G09155	phloem protein 2-B15
Medtr2g072400	3.52866	0.367804	9.59388	8.48373e-22	8.25666e-21	PF00067(Cytochrome P450)	AT3G14690	cytochrome P450, family 72, subfamily A, polypeptide 15
Medtr5g020900	3.52855	1.08362	3.25627	0.00112887	0.00283893		AT5G66440
Medtr7g111240	3.52293	0.228043	15.4485	7.71634e-54	2.44309e-52	PF00190(Cupin)	AT1G09560	germin-like protein 5
Medtr1g048480	3.51977	1.33872	2.6292	0.00855848	0.0184566
Medtr4g107930	3.51606	1.17741	2.98626	0.00282413	0.00665656	PF08246(Cathepsin propeptide inhibitor domain (I29)), PF00112(Papain family cysteine protease)	AT5G45890	senescence-associated gene 12
Medtr7g073520	3.5155	0.150409	23.3729	8.06745e-121	1.18945e-118	PF00433(Protein kinase C terminal domain), PF00069(Protein kinase domain)	AT3G08720	serine/threonine protein kinase 2
Medtr5g072980	3.51493	0.193715	18.1449	1.40915e-73	7.56525e-72	PF00067(Cytochrome P450)	AT4G31500	cytochrome P450, family 83, subfamily B, polypeptide 1
Medtr5g015020	3.51301	1.47946	2.37453	0.0175714	0.0353849	PF00155(Aminotransferase class I and II)	AT4G37770	1-amino-cyclopropane-1-carboxylate synthase 8
Medtr4g072350	3.51186	0.476678	7.36736	1.74037e-13	1.05645e-12	PF00248(Aldo/keto reductase family)	AT1G59960	NAD(P)-linked oxidoreductase superfamily protein
Medtr3g008500	3.50654	0.332822	10.5358	5.90854e-26	7.01802e-25	PF02358(Trehalose-phosphatase)	AT5G51460	Haloacid dehalogenase-like hydrolase (HAD) superfamily protein
Medtr4g128260	3.50336	0.433689	8.07804	6.5817e-16	4.66735e-15	PF00004(ATPase family associated with various cellular activities (AAA))	AT5G57480	P-loop containing nucleoside triphosphate hydrolases superfamily protein
MT4Noble_032002	3.49945	0.863844	4.05102	5.09951e-05	0.000153894
Medtr3g115170	3.49617	0.524716	6.66298	2.68339e-11	1.40822e-10		AT5G42290	transcription activator-related
Medtr1g033630	3.49052	0.78564	4.4429	8.87528e-06	2.91079e-05	PF07172(Glycine rich protein family)
Medtr3g105230	3.48886	1.26565	2.75657	0.00584107	0.013019	PF00759(Glycosyl hydrolase family 9)	AT3G43860	glycosyl hydrolase 9A4
Medtr7g104410	3.48795	1.17561	2.96693	0.0030079	0.00706388		AT3G52770	protein binding
Medtr2g044070	3.48729	0.204546	17.049	3.55815e-65	1.51939e-63	PF00534(Glycosyl transferases group 1), PF00862(Sucrose synthase)	AT3G43190	sucrose synthase 4
Medtr4g104360	3.47887	0.1284	27.0939	1.16067e-161	3.62067e-159	PF02847(MA3 domain)	AT5G63190	MA3 domain-containing protein
Medtr2g035105	3.47776	0.25315	13.738	6.01285e-43	1.36128e-41	PF00407(Pathogenesis-related protein Bet v I family)	AT1G24020	MLP-like protein 423
Medtr8g089745	3.47342	0.174864	19.8635	8.41711e-88	6.4455e-86	PF02065(Melibiase)	AT3G26380	Melibiase family protein
Medtr6g069660	3.47006	0.140319	24.7298	5.11693e-135	1.00424e-132	PF07005(Putative sugar-binding N-terminal domain), PF01116(Fructose-bisphosphate aldolase class-II)	AT1G18270	ketose-bisphosphate aldolase class-II family protein
Medtr6g077990	3.46965	0.328002	10.5782	3.76293e-26	4.51476e-25	PF02893(GRAM domain)	AT5G23370	GRAM domain-containing protein / ABA-responsive protein-related
Medtr4g118020	3.46449	0.474338	7.30385	2.79657e-13	1.6763e-12
Medtr2g068760	3.45805	0.569488	6.07221	1.2616e-09	5.85093e-09	PF03195(Protein of unknown function DUF260)	AT1G31320	LOB domain-containing protein 4
Medtr6g046930	3.45565	0.330547	10.4544	1.39943e-25	1.62445e-24	PF05630(Necrosis inducing protein (NPP1)), PF00931(NB-ARC domain)	AT3G14470	NB-ARC domain-containing disease resistance protein
Medtr8g466030	3.45435	1.39825	2.47049	0.013493	0.0278981	PF03358(NADPH-dependent FMN reductase)	AT5G54500	flavodoxin-like quinone reductase 1
Medtr8g022440	3.45201	0.323807	10.6607	1.55419e-26	1.89462e-25	PF02519(Auxin responsive protein)	AT1G72430	SAUR-like auxin-responsive protein family
Medtr3g109110	3.45186	0.827916	4.16933	3.05495e-05	9.47894e-05	PF00582(Universal stress protein family)	AT2G24370	Protein kinase protein with adenine nucleotide alpha hydrolases-like domain
Medtr5g067460	3.44986	0.43787	7.87873	3.30715e-15	2.24068e-14	PF01554(MatE)	AT1G58340	MATE efflux family protein
Medtr8g445330	3.44792	1.4802	2.32936	0.0198402	0.0395298	PF03936(Terpene synthase family, metal binding domain)	AT4G02780	Terpenoid cyclases/Protein prenyltransferases superfamily protein
Medtr4g051480	3.4475	1.27698	2.69973	0.00693957	0.0152438	PF00646(F-box domain)	AT4G02210
Medtr5g054300	3.44692	0.888865	3.87789	0.000105366	0.00030637	PF00249(Myb-like DNA-binding domain)	AT1G25550	myb-like transcription factor family protein
Medtr4g072805	3.44137	1.15454	2.98072	0.00287568	0.00677054
Medtr5g019130	3.43722	0.146289	23.496	4.47968e-122	6.80796e-120	PF03914(CBF/Mak21 family)	AT1G72440	CCAAT-binding factor
Medtr8g101650	3.43414	0.30534	11.247	2.39687e-29	3.29459e-28	PF00249(Myb-like DNA-binding domain)	AT5G56840	myb-like transcription factor family protein
Medtr7g084620	3.4328	1.40214	2.44827	0.0143545	0.0294758	PF03492(SAM dependent carboxyl methyltransferase)	AT5G38020	S-adenosyl-L-methionine-dependent methyltransferases superfamily protein
Medtr5g014960	3.43109	0.117918	29.0972	3.89651e-186	1.893e-183	PF01063(Amino-transferase class IV)	AT3G49680	branched-chain aminotransferase 3
Medtr1g044155	3.42513	0.408819	8.37811	5.37866e-17	4.05693e-16	PF03479(Domain of unknown function (DUF296))	AT4G14465	AT-hook motif nuclear-localized protein 20
Medtr3g114260	3.42173	0.663879	5.15415	2.54788e-07	9.70769e-07	PF02919(Eukaryotic DNA topoisomerase I, DNA binding fragment), PF01028(Eukaryotic DNA topoisomerase I, catalytic core)	AT5G55310	DNA topoisomerase 1 beta
Medtr4g011030	3.4208	0.33309	10.2699	9.62861e-25	1.07799e-23	PF05553(Cotton fibre expressed protein)	AT1G15385
Medtr2g011450	3.41827	0.920699	3.71269	0.000205065	0.00057304	PF00643(B-box zinc finger), PF03066(Nucleoplasmin)	AT4G27310	B-box type zinc finger family protein
MT4Noble_022321	3.41398	1.37447	2.48386	0.0129968	0.0269889
Medtr3g077000	3.41074	0.256282	13.3085	2.06509e-40	4.24109e-39	PF00168(C2 domain), PF02893(GRAM domain)	AT5G50170	C2 calcium/lipid-binding and GRAM domain containing protein
Medtr8g046210	3.40961	0.262251	13.0013	1.20263e-38	2.31729e-37	PF00067(Cytochrome P450)	AT1G33720	cytochrome P450, family 76, subfamily C, polypeptide 6
Medtr4g063040	3.40288	1.4538	2.34068	0.0192485	0.0384361	PF08449(UAA transporter family)	AT5G59740	UDP-N-acetylglucosamine (UAA) transporter family
Medtr1g054285	3.40229	0.349056	9.74712	1.8978e-22	1.91167e-21	PF02183(Homeobox associated leucine zipper), PF00046(Homeobox domain)	AT5G06710	homeobox from Arabidopsis thaliana
MT4Noble_019974	3.40177	1.387	2.45261	0.0141823	0.0291607
MT4Noble_030016	3.39854	1.30765	2.59897	0.00935048	0.0199987
MT4Noble_053042	3.39086	1.48884	2.27751	0.0227555	0.0447931
Medtr4g024370	3.38712	0.651234	5.20108	1.98131e-07	7.63837e-07	PF07279(Protein of unknown function (DUF1442))	AT2G45360	Protein of unknown function (DUF1442)
Medtr2g075570	3.38695	0.540223	6.26954	3.62108e-10	1.74404e-09
MT4Noble_049083	3.38059	0.546546	6.18538	6.19541e-10	2.9348e-09
Medtr5g062900	3.38034	1.20502	2.80521	0.00502839	0.0113338		AT5G22810	GDSL-like Lipase/Acylhydrolase superfamily protein
Medtr5g071560	3.37761	0.19995	16.8923	5.12889e-64	2.11987e-62	PF00069(Protein kinase domain)	AT2G30040	mitogen-activated protein kinase kinase kinase 14
Medtr4g083710	3.37717	1.40243	2.40809	0.0160363	0.0325884	PF00141(Peroxidase)	AT1G14550	Peroxidase superfamily protein
Medtr4g485550	3.37612	0.391783	8.61733	6.85353e-18	5.451e-17		AT4G06744	Leucine-rich repeat (LRR) family protein
Medtr4g064887	3.37518	0.40224	8.39096	4.82203e-17	3.64729e-16	PF00106(short chain dehydrogenase)	AT1G07440	NAD(P)-binding Rossmann-fold superfamily protein
Medtr8g044070	3.36823	0.361923	9.30649	1.32127e-20	1.21564e-19	PF00847(AP2 domain)	AT3G54320	Integrase-type DNA-binding superfamily protein
Medtr8g068300	3.36381	0.621356	5.41367	6.17473e-08	2.49882e-07	PF02779(Transketolase, pyrimidine binding domain), PF00676(Dehydrogenase E1 component), PF02780(Transketolase, C-terminal domain)	AT4G15560	Deoxyxylulose-5-phosphate synthase
Medtr8g058350	3.36329	0.871422	3.85955	0.000113598	0.000328885		AT1G78780	pathogenesis-related family protein
MT4Noble_030050	3.36061	0.555558	6.04907	1.45681e-09	6.72365e-09
Medtr2g015540	3.36042	0.422449	7.95461	1.79696e-15	1.23672e-14		AT2G31090
Medtr4g051093	3.35786	1.42008	2.36455	0.018052	0.036275
Medtr6g069685	3.35421	0.12306	27.2567	1.38471e-163	4.61076e-161	PF03446(NAD binding domain of 6-phosphogluconate dehydrogenase)	AT1G18270	ketose-bisphosphate aldolase class-II family protein
Medtr8g074210	3.35267	0.876376	3.82561	0.000130447	0.00037405	PF03088(Strictosidine synthase)	AT3G51430	Calcium-dependent phosphotriesterase superfamily protein
MT4Noble_012197	3.35049	1.17839	2.84329	0.00446507	0.0101646
Medtr5g090740	3.34846	0.158585	21.1146	5.84398e-99	5.69692e-97	PF00004(ATPase family associated with various cellular activities (AAA))
Medtr6g069140	3.34532	1.02096	3.27664	0.00105051	0.00265283	PF02065(Melibiase)	AT5G08370	alpha-galactosidase 2
Medtr2g098950	3.34471	0.136154	24.5658	2.93529e-133	5.64853e-131	PF00294(pfkB family carbohydrate kinase)	AT3G59480	pfkB-like carbohydrate kinase family protein
Medtr4g094412	3.34038	1.45476	2.29618	0.0216657	0.0428299	PF03106(WRKY DNA -binding domain)	AT1G68150	WRKY DNA-binding protein 9
Medtr2g008240	3.3382	0.238009	14.0255	1.08847e-44	2.644e-43	PF00933(Glycosyl hydrolase family 3 N terminal domain), PF01915(Glycosyl hydrolase family 3 C-terminal domain)	AT5G64570	beta-D-xylosidase 4
Medtr1g025780	3.33137	1.44377	2.30742	0.0210316	0.0416708	PF00657(GDSL-like Lipase/Acylhydrolase)	AT1G75900	GDSL-like Lipase/Acylhydrolase superfamily protein
Medtr1g029500	3.33015	0.202563	16.4401	9.8768e-61	3.75255e-59		AT1G21410	F-box/RNI-like superfamily protein
Medtr3g095580	3.32775	1.23311	2.69868	0.00696158	0.0152874	PF00069(Protein kinase domain)	AT1G49180	protein kinase family protein
Medtr8g070540	3.32614	0.188548	17.6409	1.19611e-69	5.79194e-68	PF00117(Glutamine amidotransferase class-I), PF06418(CTP synthase N-terminus)	AT1G30820	CTP synthase family protein
Medtr7g071110	3.32448	0.328039	10.1344	3.88776e-24	4.24516e-23	PF04535(Domain of unknown function (DUF588))	AT2G38480	Uncharacterised protein family (UPF0497)
Medtr7g096390	3.32239	0.486251	6.83266	8.33521e-12	4.55745e-11
Medtr7g011390	3.32221	0.572906	5.79887	6.67618e-09	2.92071e-08
Medtr4g022825	3.31988	1.17093	2.83525	0.00457896	0.0104047	PF02458(Transferase family)	AT5G67150	HXXXD-type acyl-transferase family protein
Medtr4g108260	3.31871	0.157461	21.0764	1.31104e-98	1.24928e-96	PF01263(Aldose 1-epimerase)	AT3G47800	Galactose mutarotase-like superfamily protein
Medtr4g013210	3.31531	0.193787	17.108	1.29406e-65	5.62308e-64	PF00501(AMP-binding enzyme)	AT3G16170	AMP-dependent synthetase and ligase family protein
Medtr7g082740	3.31123	0.552362	5.99468	2.0389e-09	9.29297e-09		AT2G47485
Medtr0549s0020	3.31074	0.42768	7.74116	9.85108e-15	6.48316e-14	PF03595(Voltage-dependent anion channel)	AT5G24030	SLAC1 homologue 3
Medtr8g041390	3.30969	0.259926	12.7332	3.86618e-37	7.04639e-36	PF00892(EamA-like transporter family)	AT5G07050	nodulin MtN21 /EamA-like transporter family protein
MT4Noble_030207	3.30772	0.957596	3.45419	0.000551954	0.00145449
Medtr1g013580	3.30467	0.701822	4.7087	2.49305e-06	8.65832e-06	PF00646(F-box domain)	AT1G13570	F-box/RNI-like superfamily protein
Medtr7g017880	3.30465	0.232308	14.2253	6.38563e-46	1.61466e-44	PF00170(bZIP transcription factor)	AT3G30530	basic leucine-zipper 42
Medtr1g087740	3.30381	1.47026	2.2471	0.0246339	0.0480857
Medtr1g072420	3.30073	0.60872	5.42241	5.87994e-08	2.38669e-07		AT1G03220	Eukaryotic aspartyl protease family protein
Medtr2g094930	3.29762	0.466185	7.07362	1.50943e-12	8.66565e-12	PF00092(von Willebrand factor type A domain), PF00097(Zinc finger, C3HC4 type (RING finger))	AT5G60710	Zinc finger (C3HC4-type RING finger) family protein
Medtr7g114700	3.29735	1.0994	2.99923	0.00270664	0.00640001	PF00612(IQ calmodulin-binding motif)	AT5G13460	IQ-domain 11
Medtr1g066380	3.29171	0.339138	9.70611	2.83966e-22	2.83249e-21	PF00141(Peroxidase)	AT2G37130	Peroxidase superfamily protein
Medtr7g102450	3.29058	0.546918	6.01659	1.78134e-09	8.15165e-09	PF00201(UDP-glucoronosyl and UDP-glucosyl transferase)	AT2G36750	UDP-glucosyl transferase 73C1
MT4Noble_035292	3.2882	1.37414	2.39291	0.0167153	0.0338129
Medtr8g022990	3.28792	0.729061	4.5098	6.4888e-06	2.15844e-05	PF03242(Late embryogenesis abundant protein)
Medtr1g008620	3.28729	1.3608	2.4157	0.0157051	0.0319832		AT5G48920	tracheary element differentiation-related 7
Medtr1g069805	3.28705	0.754508	4.35654	1.32135e-05	4.25771e-05	PF02365(No apical meristem (NAM) protein)	AT4G28530	NAC domain containing protein 74
Medtr2g022350	3.27517	0.743083	4.40755	1.04548e-05	3.40283e-05		AT1G03220	Eukaryotic aspartyl protease family protein
Medtr4g117520	3.26207	1.36908	2.38268	0.0171871	0.0346679		AT3G06210	ARM repeat superfamily protein
Medtr4g113620	3.26057	0.9334	3.49322	0.00047723	0.00127	PF00071(Ras family)	AT5G55190	RAN GTPase 3
Medtr1g042800	3.26045	1.18622	2.74861	0.00598483	0.0133244	PF01363(FYVE zinc finger), PF08381(Transcription factor regulating root and shoot growth via Pin3), PF00415(Regulator of chromosome condensation (RCC1) repeat)	AT4G14368	Regulator of chromosome condensation (RCC1) family protein
Medtr1g086510	3.2604	0.324163	10.0579	8.47782e-24	9.08974e-23	PF00249(Myb-like DNA-binding domain)	AT1G48000	myb domain protein 112
Medtr1g061540	3.25925	0.316507	10.2975	7.22876e-25	8.13922e-24	PF11961(Domain of unknown function (DUF3475)), PF05003(Protein of unknown function (DUF668))	AT3G23160	Protein of unknown function (DUF668)
Medtr7g407010	3.25818	1.41841	2.29707	0.0216149	0.0427352	PF03398(Regulator of Vps4 activity in the MVB pathway)	AT1G13340	Regulator of Vps4 activity in the MVB pathway protein
Medtr1g028890	3.25742	0.66328	4.91108	9.05751e-07	3.28101e-06	PF07714(Protein tyrosine kinase), PF08263(Leucine rich repeat N-terminal domain)	AT4G23740	Leucine-rich repeat protein kinase family protein
Medtr2g076460	3.24992	0.960596	3.38323	0.000716379	0.0018569
Medtr3g467420	3.24818	0.304804	10.6566	1.62353e-26	1.97428e-25	PF02798(Glutathione S-transferase, N-terminal domain), PF00043(Glutathione S-transferase, C-terminal domain)	AT1G78370	glutathione S-transferase TAU 20
Medtr5g010110	3.24805	0.928594	3.49781	0.000469091	0.00124935
Medtr3g028460	3.24664	0.46637	6.96151	3.36642e-12	1.89198e-11
Medtr5g066330	3.24268	0.19798	16.3788	2.70862e-60	1.01351e-58		AT4G38060
Medtr6g471240	3.24052	0.289954	11.176	5.34539e-29	7.24659e-28	PF00560(Leucine Rich Repeat), PF08263(Leucine rich repeat N-terminal domain)	AT3G11010	receptor like protein 34
Medtr1g104610	3.23844	0.429732	7.53594	4.8483e-14	3.05311e-13	PF00702(haloacid dehalogenase-like hydrolase)	AT2G32150	Haloacid dehalogenase-like hydrolase (HAD) superfamily protein
Medtr1g044340	3.23372	0.727642	4.4441	8.82591e-06	2.8962e-05	PF03407(Nucleotide-diphospho-sugar transferase)	AT1G28710	Nucleotide-diphospho-sugar transferase family protein
Medtr1g054990	3.23089	0.22385	14.4333	3.19453e-47	8.43009e-46		AT3G11690
Medtr3g108860	3.23056	0.302089	10.6941	1.08504e-26	1.33092e-25		AT2G24540	Galactose oxidase/kelch repeat superfamily protein
Medtr4g026080	3.23001	1.19919	2.69348	0.00707095	0.0154888	PF00067(Cytochrome P450)	AT3G26330	cytochrome P450, family 71, subfamily B, polypeptide 37
MT4Noble_005314	3.21682	1.41559	2.27243	0.0230607	0.0453305
Medtr5g048570	3.21442	0.892062	3.60336	0.00031413	0.000857282	PF03171(2OG-Fe(II) oxygenase superfamily)	AT1G17020	senescence-related gene 1
Medtr2g022380	3.20351	0.500062	6.40623	1.49159e-10	7.40053e-10		AT1G03220	Eukaryotic aspartyl protease family protein
Medtr8g076290	3.20289	0.234252	13.6728	1.47596e-42	3.28133e-41	PF00067(Cytochrome P450)	AT4G36220	ferulic acid 5-hydroxylase 1
Medtr7g075600	3.20017	0.245778	13.0205	9.34992e-39	1.80747e-37	PF00067(Cytochrome P450)	AT2G45550	cytochrome P450, family 76, subfamily C, polypeptide 4
Medtr1g042820	3.19692	0.425155	7.51942	5.50215e-14	3.44946e-13		AT4G14380
Medtr1g093390	3.19591	0.785128	4.07056	4.68996e-05	0.000142215
Medtr5g012850	3.19372	0.104282	30.6257	5.56251e-206	3.58359e-203		AT5G47435	formyltetrahydrofolate deformylase, putative
Medtr8g098945	3.19088	0.599073	5.32635	1.00204e-07	3.9753e-07	PF03106(WRKY DNA -binding domain)	AT4G23550	WRKY family transcription factor
Medtr2g023810	3.18958	1.09031	2.92539	0.00344025	0.00799558		AT4G04480
Medtr3g096390	3.18112	0.0961972	33.0688	8.36312e-240	8.54624e-237	PF00676(Dehydrogenase E1 component)	AT5G09300	Thiamin diphosphate-binding fold (THDP-binding) superfamily protein
Medtr6g084470	3.18033	0.19953	15.9391	3.39155e-57	1.16599e-55		AT5G16110
Medtr2g086680	3.17951	1.10445	2.87882	0.00399161	0.0091564	PF01190(Pollen proteins Ole e I like)	AT2G27385	Pollen Ole e 1 allergen and extensin family protein
Medtr6g082500	3.17743	1.35275	2.34888	0.01883	0.0376613	PF07224(Chlorophyllase)	AT1G19670	chlorophyllase 1
Medtr4g094548	3.17673	0.254399	12.4872	8.76759e-36	1.5266e-34	PF07712(Stress up-regulated Nod 19)	AT5G61820
Medtr1g044470	3.17638	0.60402	5.25873	1.45053e-07	5.66954e-07
Medtr8g018370	3.17561	1.00076	3.17322	0.0015076	0.00371943	PF00271(Helicase conserved C-terminal domain), PF00270(DEAD/DEAH box helicase)	AT1G54270	eif4a-2
Medtr5g012400	3.17462	0.546047	5.81382	6.10626e-09	2.68286e-08
Medtr6g079550	3.1607	0.227788	13.8757	8.89687e-44	2.08921e-42	PF00071(Ras family)	AT1G73640	RAB GTPase homolog A6A
Medtr7g111020	3.15795	1.20844	2.61324	0.00896874	0.0192489	PF00483(Nucleotidyl transferase)	AT1G27680	ADPGLC-PPase large subunit
Medtr7g063540	3.1565	0.341935	9.23128	2.67429e-20	2.41992e-19
Medtr1g098760	3.14916	1.03617	3.03923	0.00237185	0.00566898
Medtr7g117415	3.14428	0.157916	19.911	3.26619e-88	2.53387e-86	PF03145(Seven in absentia protein family)	AT3G61790	Protein with RING/U-box and TRAF-like domains
Medtr1g015860	3.1433	0.603696	5.20676	1.92171e-07	7.4221e-07	PF00067(Cytochrome P450)	AT2G26170	cytochrome P450, family 711, subfamily A, polypeptide 1
Medtr3g088940	3.14118	1.31903	2.38143	0.0172457	0.0347788	PF00764(Arginosuccinate synthase)	AT4G24830	arginosuccinate synthase family
Medtr2g079440	3.13931	0.675989	4.64403	3.41682e-06	1.1721e-05	PF00304(Gamma-thionin family)	AT5G63660	Scorpion toxin-like knottin superfamily protein
Medtr5g011390	3.13475	1.26442	2.47921	0.0131674	0.027305	PF12214(Cell cycle regulated microtubule associated protein)	AT4G22860	Cell cycle regulated microtubule associated protein
Medtr6g021915	3.13203	0.539875	5.80139	6.57658e-09	2.88053e-08	PF01210(NAD-dependent glycerol-3-phosphate dehydrogenase N-terminus), PF07479(NAD-dependent glycerol-3-phosphate dehydrogenase C-terminus)	AT5G40610	NAD-dependent glycerol-3-phosphate dehydrogenase family protein
Medtr5g093750	3.13066	0.923991	3.38819	0.000703551	0.00182524
Medtr4g094010	3.12749	0.34862	8.97105	2.93696e-19	2.50754e-18	PF01061(ABC-2 type transporter), PF00005(ABC transporter)	AT1G17840	white-brown complex homolog protein 11
Medtr4g132380	3.12744	0.486	6.43506	1.23425e-10	6.16191e-10		AT4G04480
Medtr5g023170	3.12574	0.0935172	33.4242	6.09998e-245	7.23092e-242	PF00581(Rhodanese-like domain)	AT4G35770	Rhodanese/Cell cycle control phosphatase superfamily protein
Medtr4g122640	3.11326	0.17894	17.3984	8.49063e-68	3.93771e-66	PF00141(Peroxidase)	AT4G16270	Peroxidase superfamily protein
Medtr5g071360	3.11297	0.289611	10.7488	6.00243e-27	7.43033e-26	PF00733(Asparagine synthase)	AT3G47340	glutamine-dependent asparagine synthase 1
MT4Noble_038353	3.10838	0.641465	4.84576	1.26131e-06	4.51654e-06
Medtr2g089930	3.10748	0.276136	11.2535	2.22703e-29	3.06825e-28	PF12609(Wound-induced protein)	AT4G10265	Wound-responsive family protein
Medtr1g105615	3.10675	0.648481	4.79082	1.66104e-06	5.86848e-06	PF01657(Salt stress response/antifungal), PF00069(Protein kinase domain)	AT4G05200	cysteine-rich RLK (RECEPTOR-like protein kinase) 25
Medtr3g069570	3.09611	1.30033	2.38102	0.0172648	0.0348151		AT2G39855
Medtr4g129780	3.09443	0.319485	9.68567	3.46917e-22	3.45228e-21		AT4G30460	glycine-rich protein
Medtr3g069050	3.09369	0.235858	13.1167	2.64106e-39	5.21437e-38	PF07714(Protein tyrosine kinase)	AT5G02070	Protein kinase family protein
Medtr3g098580	3.09334	0.680035	4.54879	5.39547e-06	1.8102e-05	PF00847(AP2 domain)	AT5G61890	Integrase-type DNA-binding superfamily protein
Medtr5g021480	3.09259	1.25387	2.46644	0.0136464	0.02818
Medtr1g086080	3.08949	0.278754	11.0832	1.51328e-28	2.01284e-27	PF00664(ABC transporter transmembrane region), PF00005(ABC transporter)	AT3G62150	P-glycoprotein 21
Medtr2g078990	3.08939	0.189241	16.3251	6.53867e-60	2.41012e-58	PF01554(MatE)	AT3G23560	MATE efflux family protein
Medtr8g071900	3.08625	0.798657	3.8643	0.000111409	0.000322959	PF00534(Glycosyl transferases group 1)	AT4G19460	UDP-Glycosyltransferase superfamily protein
Medtr5g055130	3.08588	0.269399	11.4547	2.22746e-30	3.17054e-29		AT2G39300
Medtr8g028525	3.08234	0.536293	5.7475	9.05731e-09	3.92474e-08
Medtr8g064760	3.07952	0.791749	3.88952	0.000100441	0.000292539		AT1G23530
Medtr3g087050	3.07567	0.6541	4.70214	2.57453e-06	8.9298e-06	PF00561(alpha/beta hydrolase fold)	AT4G39955	alpha/beta-Hydrolases superfamily protein
Medtr8g016220	3.0746	0.246305	12.4829	9.25283e-36	1.60826e-34		AT1G55160
Medtr5g056480	3.06865	0.28664	10.7056	9.58405e-27	1.17706e-25		AT1G68440
Medtr1g418545	3.06851	0.178952	17.1471	6.60614e-66	2.90034e-64	PF00887(Acyl CoA binding protein)	AT4G24230	acyl-CoA-binding domain 3
Medtr7g102820	3.0617	0.437389	6.99994	2.56072e-12	1.44822e-11	PF03171(2OG-Fe(II) oxygenase superfamily)	AT2G36690	2-oxoglutarate (2OG) and Fe(II)-dependent oxygenase superfamily protein
Medtr3g079320	3.05765	0.734961	4.16029	3.17843e-05	9.83736e-05	PF00106(short chain dehydrogenase)	AT3G61220	NAD(P)-binding Rossmann-fold superfamily protein
Medtr2g086300	3.057	0.53493	5.71477	1.09855e-08	4.7326e-08	PF00561(alpha/beta hydrolase fold)	AT3G44510	alpha/beta-Hydrolases superfamily protein
Medtr4g026070	3.0569	0.994518	3.07375	0.00211389	0.00509725	PF00067(Cytochrome P450)	AT4G31500	cytochrome P450, family 83, subfamily B, polypeptide 1
Medtr8g039820	3.04998	0.238566	12.7847	1.99747e-37	3.66988e-36	PF01582(TIR domain), PF00931(NB-ARC domain)	AT5G17680	disease resistance protein (TIR-NBS-LRR class), putative
Medtr4g096730	3.04977	1.24347	2.45263	0.0141816	0.0291607	PF08387(FBD)	AT5G56800	Protein with RNI-like/FBD-like domains
Medtr7g035095	3.04895	0.291531	10.4584	1.34079e-25	1.56004e-24		AT5G62960
Medtr5g066760	3.04711	0.350013	8.7057	3.15617e-18	2.55415e-17		AT2G38465
Medtr5g066800	3.0466	0.878385	3.46841	0.000523547	0.00138517	PF00012(Hsp70 protein)	AT3G12580	heat shock protein 70
Medtr8g067690	3.04339	1.26034	2.41474	0.0157464	0.0320543	PF00069(Protein kinase domain), PF00139(Legume lectin domain)	AT5G10530	Concanavalin A-like lectin protein kinase family protein
Medtr1g089090	3.04327	1.06347	2.86163	0.00421465	0.0096367
Medtr3g069290	3.0426	0.278166	10.9381	7.57926e-28	9.76147e-27
Medtr3g061030	3.04195	0.126882	23.9747	5.10924e-127	8.75216e-125	PF00485(Phosphoribulokinase / Uridine kinase family)	AT4G26510	uridine kinase-like 4
Medtr1g106730	3.04093	0.364128	8.35126	6.75374e-17	5.06317e-16		AT1G27730	salt tolerance zinc finger
Medtr4g108760	3.04028	0.275924	11.0185	3.11096e-28	4.07574e-27	PF02365(No apical meristem (NAM) protein)	AT5G61430	NAC domain containing protein 100
Medtr7g081120	3.03937	0.495539	6.13346	8.59893e-10	4.03466e-09
Medtr5g010150	3.03818	0.514762	5.9021	3.58893e-09	1.60565e-08	PF00230(Major intrinsic protein)	AT4G00430	plasma membrane intrinsic protein 1;4
Medtr2g089955	3.03492	0.692782	4.38078	1.18256e-05	3.82799e-05
Medtr5g019610	3.03443	1.08498	2.79676	0.00516182	0.0116098
Medtr8g005880	3.0343	0.7807	3.88664	0.000101642	0.00029586		AT3G60520
Medtr3g067565	3.02362	1.01176	2.98847	0.00280379	0.0066102	PF00076(RNA recognition motif. (a.k.a. RRM, RBD, or RNP domain))
Medtr4g088400	3.01892	0.188643	16.0033	1.21116e-57	4.22765e-56	PF00067(Cytochrome P450)	AT4G31940	cytochrome P450, family 82, subfamily C, polypeptide 4
Medtr4g011230	3.0164	0.617652	4.88366	1.04132e-06	3.75376e-06		AT1G52690	Late embryogenesis abundant protein (LEA) family protein
Medtr8g022300	3.01121	0.23465	12.8327	1.0749e-37	1.99343e-36	PF05564(Dormancy/auxin associated protein)	AT1G54070	Dormancy/auxin associated family protein
Medtr8g086270	3.01013	0.180942	16.6359	3.8284e-62	1.51071e-60	PF00244(14-3-3 protein)	AT2G42590	general regulatory factor 9
Medtr4g080790	3.00915	0.12585	23.9106	2.37877e-126	4.02828e-124	PF01012(Electron transfer flavoprotein domain), PF00766(Electron transfer flavoprotein FAD-binding domain)	AT1G50940	electron transfer flavoprotein alpha
Medtr4g134090	3.00667	0.174688	17.2117	2.16997e-66	9.64125e-65	PF00108(Thiolase, N-terminal domain)	AT5G48230	acetoacetyl-CoA thiolase 2
MT4Noble_049810	3.00651	0.568386	5.28956	1.22612e-07	4.82037e-07
Medtr2g105800	3.00314	0.675909	4.44312	8.86644e-06	2.90853e-05		AT3G03280
Medtr1750s0010	3.0031	0.337222	8.9054	5.31957e-19	4.47475e-18	PF00067(Cytochrome P450)	AT3G26210	cytochrome P450, family 71, subfamily B, polypeptide 23
Medtr4g081390	3.00208	0.467089	6.42722	1.29957e-10	6.48145e-10	PF00225(Kinesin motor domain)	AT5G54670	kinesin 3
Medtr7g034100	3.00036	0.865427	3.46691	0.000526471	0.00139241
Medtr7g011950	2.99837	0.826622	3.62725	0.000286452	0.000785158	PF00319(SRF-type transcription factor (DNA-binding and dimerisation domain))	AT5G48670	AGAMOUS-like 80
Medtr1g074170	2.99583	0.167985	17.8339	3.85415e-71	1.93918e-69	PF01012(Electron transfer flavoprotein domain)	AT5G43430	electron transfer flavoprotein beta
Medtr1g037130	2.99372	0.546542	5.47757	4.31194e-08	1.77232e-07	PF00931(NB-ARC domain)	AT4G27190	NB-ARC domain-containing disease resistance protein
Medtr8g092290	2.98957	0.675931	4.42289	9.7389e-06	3.17995e-05	PF00069(Protein kinase domain)	AT1G53050	Protein kinase superfamily protein
Medtr1g012390	2.98931	0.985533	3.03319	0.00241986	0.00577395	PF00295(Glycosyl hydrolases family 28)	AT4G35670	Pectin lyase-like superfamily protein
Medtr4g124520	2.98654	0.738084	4.04634	5.20247e-05	0.000156873	PF01095(Pectinesterase), PF04043(Plant invertase/pectin methylesterase inhibitor)	AT2G26440	Plant invertase/pectin methylesterase inhibitor superfamily
Medtr5g023120	2.98588	0.572911	5.21178	1.87038e-07	7.22762e-07	PF08137(DVL family)	AT4G35783	ROTUNDIFOLIA like 6
Medtr6g087320	2.98503	0.761091	3.92204	8.78031e-05	0.000257756	PF00560(Leucine Rich Repeat), PF01582(TIR domain), PF00931(NB-ARC domain)	AT5G17680	disease resistance protein (TIR-NBS-LRR class), putative
Medtr7g086010	2.98202	0.65396	4.55994	5.11673e-06	1.72155e-05	PF00933(Glycosyl hydrolase family 3 N terminal domain), PF01915(Glycosyl hydrolase family 3 C-terminal domain)	AT5G20950	Glycosyl hydrolase family protein
Medtr2g072910	2.98044	1.05991	2.81197	0.0049239	0.0111135	PF03171(2OG-Fe(II) oxygenase superfamily)	AT1G17020	senescence-related gene 1
Medtr3g106930	2.97686	0.992184	3.00031	0.00269709	0.00637996	PF02485(Core-2/I-Branching enzyme)	AT4G32290	Core-2/I-branching beta-1,6-N-acetylglucosaminyltransferase family protein
Medtr2g073650	2.97683	0.177063	16.8123	1.98278e-63	8.08251e-62	PF00069(Protein kinase domain), PF00560(Leucine Rich Repeat), PF11721(Di-glucose binding within endoplasmic reticulum)	AT3G14840	Leucine-rich repeat transmembrane protein kinase
MT4Noble_057126	2.976	0.626715	4.74857	2.04859e-06	7.18205e-06
Medtr1g012700	2.97588	0.456806	6.51455	7.29087e-11	3.70291e-10	PF00234(Protease inhibitor/seed storage/LTP family)	AT2G45180	Bifunctional inhibitor/lipid-transfer protein/seed storage 2S albumin superfamily protein
Medtr2g022560	2.97557	0.324729	9.16325	5.03589e-20	4.48164e-19	PF03005()	AT3G06080	Plant protein of unknown function (DUF828)
Medtr2g034340	2.9734	0.458196	6.48937	8.61935e-11	4.34782e-10
Medtr2g033170	2.97288	0.347739	8.54917	1.23978e-17	9.69668e-17	PF00249(Myb-like DNA-binding domain)	AT5G49620	myb domain protein 78
MT4Noble_022320	2.9723	0.99331	2.99232	0.00276862	0.00653614
Medtr7g117405	2.9706	0.293802	10.1109	4.94252e-24	5.36134e-23	PF00201(UDP-glucoronosyl and UDP-glucosyl transferase)	AT2G36780	UDP-Glycosyltransferase superfamily protein
Medtr2g011690	2.96572	0.735549	4.03197	5.53101e-05	0.000166239	PF12609(Wound-induced protein)	AT4G10270	Wound-responsive family protein
Medtr0045s0110	2.96338	0.418524	7.08056	1.43576e-12	8.25391e-12	PF04862(Protein of unknown function (DUF642))	AT3G08030	Protein of unknown function, DUF642
Medtr2g015750	2.96327	0.377648	7.84666	4.27275e-15	2.87257e-14
Medtr5g015190	2.96316	0.846761	3.4994	0.0004663	0.00124236	PF05678(VQ motif)	AT2G22880	VQ motif-containing protein
Medtr1g086950	2.96236	0.924726	3.2035	0.0013577	0.0033732		AT2G47360
Medtr8g068110	2.96199	0.392134	7.5535	4.23708e-14	2.68074e-13	PF06045(Rhamnogalacturonate lyase family)	AT2G22620	Rhamnogalacturonate lyase family protein
Medtr1g017830	2.95866	0.339005	8.72749	2.60392e-18	2.11533e-17		AT1G10140	Uncharacterised conserved protein UCP031279
Medtr7g082730	2.95812	0.286972	10.308	6.48086e-25	7.31101e-24		AT2G47485
Medtr6g005340	2.95695	1.00883	2.93108	0.00337785	0.00786166	PF00190(Cupin)	AT5G39120	RmlC-like cupins superfamily protein
Medtr6g021730	2.95449	0.231909	12.7399	3.54957e-37	6.4813e-36	PF07002(Copine)	AT5G14420	RING domain ligase2
MT4Noble_033565	2.95259	0.528313	5.58872	2.28754e-08	9.61576e-08
Medtr8g095220	2.94711	0.0619349	47.5841	0	0	PF08240(Alcohol dehydrogenase GroES-like domain), PF00107(Zinc-binding dehydrogenase)	AT5G63620	GroES-like zinc-binding alcohol dehydrogenase family protein
Medtr2g105010	2.94591	0.164664	17.8904	1.39983e-71	7.14011e-70	PF03822(NAF domain), PF00069(Protein kinase domain)	AT5G25110	CBL-interacting protein kinase 25
Medtr5g023110	2.94591	0.158032	18.6412	1.48766e-77	8.90643e-76	PF02577(Bifunctional nuclease)	AT5G66050	Wound-responsive family protein
Medtr1g019440	2.94466	0.169713	17.3508	1.94381e-67	8.91716e-66	PF07821(Alpha-amylase C-terminal beta-sheet domain), PF00128(Alpha amylase, catalytic domain)	AT4G25000	alpha-amylase-like
Medtr4g124700	2.94243	0.79719	3.69101	0.000223368	0.000620676	PF02519(Auxin responsive protein)	AT5G20820	SAUR-like auxin-responsive protein family
Medtr1g087330	2.94217	0.463413	6.34892	2.16833e-10	1.06195e-09	PF01764(Lipase (class 3))	AT1G02660	alpha/beta-Hydrolases superfamily protein
Medtr4g086730	2.94155	0.59261	4.96372	6.91542e-07	2.53354e-06	PF02298(Plastocyanin-like domain)	AT2G15780	Cupredoxin superfamily protein
Medtr7g103900	2.9388	0.206974	14.1989	9.305e-46	2.33888e-44	PF05910(Plant protein of unknown function (DUF868))	AT2G27770	Plant protein of unknown function (DUF868)
Medtr7g013260	2.93878	0.231865	12.6745	8.18416e-37	1.47529e-35	PF00201(UDP-glucoronosyl and UDP-glucosyl transferase)	AT3G02100	UDP-Glycosyltransferase superfamily protein
Medtr1g006695	2.93631	0.115588	25.4033	2.32025e-142	4.98265e-140	PF00415(Regulator of chromosome condensation (RCC1) repeat)	AT5G11580	Regulator of chromosome condensation (RCC1) family protein
Medtr2g074955	2.93609	0.829153	3.54107	0.000398508	0.00107186
Medtr4g120970	2.93507	0.232118	12.6447	1.19605e-36	2.14688e-35	PF00407(Pathogenesis-related protein Bet v I family)
Medtr7g085840	2.93471	0.484084	6.06239	1.34115e-09	6.20819e-09	PF03016(Exostosin family)	AT4G38040	Exostosin family protein
Medtr4g132810	2.93274	0.152812	19.1918	4.33539e-82	2.87426e-80	PF03162(Tyrosine phosphatase family)	AT1G05000	Phosphotyrosine protein phosphatases superfamily protein
Medtr4g087400	2.929	0.763792	3.83481	0.000125661	0.000361338		AT5G16110
Medtr4g097440	2.92463	0.527461	5.54473	2.944e-08	1.22518e-07	PF00170(bZIP transcription factor)	AT2G22850	basic leucine-zipper 6
Medtr4g013245	2.9226	0.205293	14.2362	5.46226e-46	1.38709e-44	PF06963(Ferroportin1 (FPN1))	AT5G03570	iron regulated 2
Medtr4g120130	2.9187	0.153129	19.0605	5.37644e-81	3.46371e-79	PF00725(3-hydroxyacyl-CoA dehydrogenase, C-terminal domain), PF02737(3-hydroxyacyl-CoA dehydrogenase, NAD binding domain), PF00378(Enoyl-CoA hydratase/isomerase)	AT3G06860	multifunctional protein 2
Medtr5g018280	2.9163	0.168544	17.3029	4.47575e-67	2.04374e-65	PF00561(alpha/beta hydrolase fold)	AT2G23610	methyl esterase 3
Medtr1g088660	2.91507	0.220608	13.2138	7.30371e-40	1.47342e-38	PF03105(SPX domain)	AT1G02860	SPX (SYG1/Pho81/XPR1) domain-containing protein
Medtr3g095460	2.91289	0.584876	4.98035	6.3468e-07	2.33649e-06	PF00892(EamA-like transporter family)	AT5G64700	nodulin MtN21 /EamA-like transporter family protein
Medtr2g056130	2.91274	0.851638	3.42017	0.000625829	0.00163563	PF00335(Tetraspanin family)	AT1G18520	tetraspanin11
Medtr3g069760	2.90977	0.766896	3.79422	0.000148108	0.000421348	PF00097(Zinc finger, C3HC4 type (RING finger))	AT5G05830	RING/FYVE/PHD zinc finger superfamily protein
Medtr4g091200	2.90476	0.251643	11.5432	7.99236e-31	1.15708e-29	PF01565(FAD binding domain ), PF08031(Berberine and berberine like )	AT4G20800	FAD-binding Berberine family protein
Medtr4g122670	2.90338	0.0952876	30.4696	6.58237e-204	3.90137e-201	PF00288(GHMP kinases N terminal domain), PF10509(Galactokinase galactose-binding signature)	AT3G06580	Mevalonate/galactokinase family protein
Medtr6g086340	2.89987	0.308575	9.3976	5.58243e-21	5.21384e-20	PF00171(Aldehyde dehydrogenase family)	AT3G24503	aldehyde dehydrogenase 2C4
Medtr4g105020	2.89895	0.39748	7.29334	3.02359e-13	1.80726e-12	PF00564(PB1 domain)	AT3G48240	Octicosapeptide/Phox/Bem1p family protein
Medtr2g089925	2.8937	0.566021	5.11235	3.18179e-07	1.20332e-06	PF12609(Wound-induced protein)	AT4G10265	Wound-responsive family protein
Medtr6g088450	2.89334	0.370852	7.80185	6.10039e-15	4.06532e-14	PF00083(Sugar (and other) transporter)	AT3G18830	polyol/monosaccharide transporter 5
Medtr4g094555	2.89257	1.16422	2.48455	0.0129714	0.0269478	PF07712(Stress up-regulated Nod 19)	AT5G61820
Medtr8g027345	2.89161	0.23603	12.251	1.65901e-34	2.76829e-33	PF00249(Myb-like DNA-binding domain)	AT5G49330	myb domain protein 111
Medtr3g450310	2.89101	0.48922	5.90942	3.43306e-09	1.5387e-08	PF00249(Myb-like DNA-binding domain)	AT2G02060	Homeodomain-like superfamily protein
Medtr4g079810	2.88871	1.04655	2.76023	0.00577613	0.012881		AT1G06320
Medtr2g091250	2.88859	1.15139	2.50878	0.012115	0.0253212	PF07899(Frigida-like protein)	AT5G27220	Frigida-like protein
Medtr7g092750	2.8851	0.25051	11.5169	1.08428e-30	1.56136e-29	PF00170(bZIP transcription factor)	AT5G06839	bZIP transcription factor family protein
Medtr8g012620	2.88359	0.710196	4.06028	4.90139e-05	0.000148308	PF07897(Ethylene-responsive binding factor-associated repression)	AT3G29575	ABI five binding protein 3
Medtr2g079950	2.87623	0.501563	5.73453	9.77813e-09	4.22474e-08	PF01582(TIR domain)	AT1G52900	Toll-Interleukin-Resistance (TIR) domain family protein
Medtr7g020820	2.87536	0.226627	12.6876	6.92595e-37	1.25229e-35	PF01619(Proline dehydrogenase)	AT5G38710	Methylenetetrahydrofolate reductase family protein
Medtr8g076040	2.87343	0.246432	11.6602	2.03676e-31	3.01496e-30	PF02519(Auxin responsive protein)	AT4G34760	SAUR-like auxin-responsive protein family
Medtr3g106920	2.87201	0.386244	7.43573	1.03989e-13	6.40291e-13
Medtr1g092970	2.87144	0.573535	5.00657	5.54089e-07	2.05281e-06
Medtr0001s0660	2.86929	0.123395	23.2529	1.32984e-119	1.90386e-117	PF08240(Alcohol dehydrogenase GroES-like domain), PF00107(Zinc-binding dehydrogenase)	AT1G22440	Zinc-binding alcohol dehydrogenase family protein
Medtr1g027160	2.86858	0.534021	5.37166	7.80173e-08	3.12692e-07	PF00069(Protein kinase domain)	AT1G66980	suppressor of npr1-1 constitutive 4
Medtr4g009920	2.86747	0.11545	24.8374	3.53875e-136	6.99139e-134	PF00370(FGGY family of carbohydrate kinases, N-terminal domain), PF02782(FGGY family of carbohydrate kinases, C-terminal domain)	AT1G80460	Actin-like ATPase superfamily protein
Medtr2g030480	2.85766	0.778626	3.67013	0.000242432	0.000670943	PF07712(Stress up-regulated Nod 19)	AT5G61820
Medtr3g095730	2.8573	0.272923	10.4693	1.19565e-25	1.3961e-24	PF04564(U-box domain)	AT5G64660	CYS, MET, PRO, and GLY protein 2
Medtr3g107890	2.85438	0.286315	9.96939	2.07502e-23	2.17907e-22		AT2G25625
Medtr1g086790	2.85247	0.176239	16.1852	6.40927e-59	2.30788e-57	PF03106(WRKY DNA -binding domain)	AT2G47260	WRKY DNA-binding protein 23
Medtr1g090717	2.84961	0.434027	6.56552	5.18517e-11	2.66221e-10	PF00071(Ras family)	AT5G03530	RAB GTPase homolog C2A
Medtr4g063470	2.84887	0.525674	5.41946	5.97789e-08	2.4228e-07	PF00677(Lumazine binding domain)	AT2G20690	lumazine-binding family protein
Medtr6g021860	2.84636	0.337617	8.43072	3.4353e-17	2.62249e-16
Medtr8g099320	2.84453	0.215394	13.2062	8.08302e-40	1.62953e-38	PF01490(Transmembrane amino acid transporter protein)	AT5G41800	Transmembrane amino acid transporter family protein
Medtr4g098870	2.84264	0.159087	17.8684	2.07723e-71	1.0559e-69	PF00072(Response regulator receiver domain), PF00249(Myb-like DNA-binding domain)	AT4G18020	CheY-like two-component responsive regulator family protein
Medtr4g088160	2.83913	0.351669	8.07329	6.84279e-16	4.84671e-15	PF00067(Cytochrome P450)	AT5G06900	cytochrome P450, family 93, subfamily D, polypeptide 1
Medtr6g043880	2.83898	0.333145	8.52174	1.57177e-17	1.22255e-16	PF00083(Sugar (and other) transporter)	AT1G22710	sucrose-proton symporter 2
Medtr4g056470	2.83663	0.998011	2.84228	0.0044792	0.0101928	PF02170(PAZ domain), PF02171(Piwi domain), PF08699(Argonaute linker 1 domain)	AT2G27880	Argonaute family protein
Medtr1g066390	2.8357	0.118669	23.8958	3.38849e-126	5.64145e-124	PF00240(Ubiquitin family)	AT4G05320	polyubiquitin 10
Medtr2g090190	2.83549	0.169283	16.75	5.66318e-63	2.28338e-61	PF00481(Protein phosphatase 2C)	AT4G03415	Protein phosphatase 2C family protein
Medtr3g077590	2.83312	0.0887146	31.9352	8.66733e-224	7.33875e-221	PF00591(Glycosyl transferase family, a/b domain), PF02885(Glycosyl transferase family, helical bundle domain)	AT5G17990	tryptophan biosynthesis 1
Medtr5g043285	2.8311	0.269601	10.5011	8.53979e-26	1.00547e-24
Medtr4g027040	2.82519	0.355539	7.9462	1.92315e-15	1.32111e-14		AT1G10170	NF-X-like 1
Medtr3g117290	2.82505	0.259694	10.8784	1.46173e-27	1.86076e-26	PF00257(Dehydrin)	AT1G76180	Dehydrin family protein
Medtr5g090900	2.82008	0.336179	8.38864	4.91817e-17	3.71811e-16		AT1G06660
Medtr6g045200	2.81943	0.347423	8.11527	4.84691e-16	3.46283e-15	PF03595(Voltage-dependent anion channel)	AT5G24030	SLAC1 homologue 3
Medtr4g057500	2.81757	0.137851	20.4393	7.48606e-93	6.41183e-91	PF03016(Exostosin family)	AT2G28110	Exostosin family protein
Medtr4g120940	2.81235	0.228685	12.2979	9.29055e-35	1.55815e-33	PF00407(Pathogenesis-related protein Bet v I family)
Medtr7g014620	2.81032	0.207407	13.5498	7.94158e-42	1.71913e-40	PF02458(Transferase family)	AT5G39050	HXXXD-type acyl-transferase family protein
Medtr4g099060	2.80923	0.195913	14.3392	1.24527e-46	3.23715e-45		AT4G17680	SBP (S-ribonuclease binding protein) family protein
Medtr1g100733	2.80778	0.410666	6.83714	8.07883e-12	4.42217e-11
Medtr2g035480	2.80584	0.282192	9.94302	2.7051e-23	2.82871e-22	PF03473(MOSC domain)	AT1G30910	Molybdenum cofactor sulfurase family protein
Medtr8g445540	2.80485	0.27907	10.0507	9.1202e-24	9.75378e-23
Medtr1g111510	2.80335	0.190874	14.6869	7.82188e-49	2.16637e-47	PF07690(Major Facilitator Superfamily), PF06813(Nodulin-like)	AT2G39210	Major facilitator superfamily protein
Medtr2g090865	2.80245	0.230461	12.1602	5.06464e-34	8.31066e-33	PF00071(Ras family)	AT5G60860	RAB GTPase homolog A1F
Medtr5g019680	2.79839	0.362966	7.70977	1.26049e-14	8.22416e-14	PF00046(Homeobox domain)	AT4G36740	homeobox protein 40
Medtr7g013820	2.79817	0.200376	13.9646	2.56433e-44	6.13845e-43	PF07897(Ethylene-responsive binding factor-associated repression)	AT3G29575	ABI five binding protein 3
Medtr7g063950	2.79779	0.457125	6.12041	9.33333e-10	4.3668e-09
Medtr0551s0020	2.79683	0.559534	4.99851	5.77762e-07	2.13838e-06
Medtr2g020750	2.79153	0.276876	10.0822	6.61951e-24	7.14382e-23	PF01156(Inosine-uridine preferring nucleoside hydrolase)	AT5G18860	inosine-uridine preferring nucleoside hydrolase family protein
Medtr3g088895	2.79119	0.156436	17.8424	3.3116e-71	1.67188e-69	PF00646(F-box domain)	AT1G21410	F-box/RNI-like superfamily protein
Medtr1g015000	2.7907	0.473574	5.89285	3.79583e-09	1.69488e-08	PF04145(Ctr copper transporter family)	AT5G20650	copper transporter 5
Medtr8g045000	2.78995	0.96382	2.89468	0.00379547	0.00874165
Medtr7g029365	2.78829	0.205155	13.5911	4.51949e-42	9.89911e-41	PF00561(alpha/beta hydrolase fold), PF04083(Partial alpha/beta-hydrolase lipase region)	AT5G14180	Myzus persicae-induced lipase 1
Medtr2g438230	2.78752	1.16922	2.38407	0.0171222	0.0345486
Medtr7g111890	2.78544	0.593656	4.69201	2.70534e-06	9.36269e-06	PF04853()	AT3G05820	invertase H
Medtr3g024520	2.78521	0.425492	6.54585	5.91575e-11	3.02577e-10	PF00067(Cytochrome P450)	AT5G07990	Cytochrome P450 superfamily protein
Medtr6g034905	2.78481	0.600218	4.63966	3.48975e-06	1.19587e-05	PF04554(Extensin-like region)	AT1G21310	extensin 3
Medtr5g060330	2.78388	0.473951	5.87378	4.2597e-09	1.89401e-08	PF01094(Receptor family ligand binding region), PF00497(Bacterial extracellular solute-binding proteins, family 3)	AT5G27100	glutamate receptor 2.1
Medtr4g129760	2.78188	0.371034	7.49764	6.49775e-14	4.05391e-13		AT4G30460	glycine-rich protein
Medtr0314s0030	2.78127	0.211082	13.1762	1.20252e-39	2.40789e-38	PF03171(2OG-Fe(II) oxygenase superfamily)	AT4G13400	2-oxoglutarate (2OG) and Fe(II)-dependent oxygenase superfamily protein
Medtr7g016700	2.78009	0.258715	10.7458	6.20236e-27	7.6714e-26	PF00195(Chalcone and stilbene synthases, N-terminal domain), PF02797(Chalcone and stilbene synthases, C-terminal domain)	AT5G13930	Chalcone and stilbene synthase family protein
Medtr7g072250	2.77867	0.270692	10.265	1.01283e-24	1.13265e-23	PF04525(LURP-one-related)	AT5G01750	Protein of unknown function (DUF567)
Medtr4g073590	2.77735	0.162807	17.0592	2.98726e-65	1.28301e-63	PF00241(Cofilin/tropomyosin-type actin-binding protein)	AT2G16700	actin depolymerizing factor 5
Medtr1g089570	2.77628	0.203134	13.6672	1.59392e-42	3.53825e-41	PF00069(Protein kinase domain)	AT5G35960	Protein kinase family protein
Medtr5g005450	2.77383	0.263978	10.5078	7.95104e-26	9.36895e-25	PF00069(Protein kinase domain), PF01657(Salt stress response/antifungal)	AT4G05200	cysteine-rich RLK (RECEPTOR-like protein kinase) 25
Medtr3g071970	2.77325	0.0866119	32.0192	5.89184e-225	5.13544e-222	PF11891(Domain of unknown function (DUF3411)), PF04187(Haem-binding uptake, Tiki superfamily, ChaN)	AT2G40400	Protein of unknown function (DUF399 and DUF3411)
Medtr2g042330	2.77042	0.166053	16.6839	1.716e-62	6.86282e-61	PF00171(Aldehyde dehydrogenase family)	AT1G54100	aldehyde dehydrogenase 7B4
Medtr4g128310	2.7694	0.656868	4.21607	2.48598e-05	7.78035e-05	PF01762(Galactosyltransferase)	AT5G57500	Galactosyltransferase family protein
Medtr3g080020	2.76878	0.620832	4.45979	8.20404e-06	2.70231e-05		AT3G20420	RNAse THREE-like protein 2
Medtr3g107100	2.76701	0.457383	6.04966	1.45151e-09	6.7013e-09	PF00646(F-box domain), PF08387(FBD)	AT1G78750	F-box/RNI-like superfamily protein
Medtr4g046113	2.76631	0.24287	11.3901	4.68528e-30	6.60239e-29	PF07714(Protein tyrosine kinase), PF00560(Leucine Rich Repeat)	AT4G03390	STRUBBELIG-receptor family 3
Medtr2g039090	2.76036	0.353748	7.80318	6.03645e-15	4.02453e-14	PF00931(NB-ARC domain)	AT3G14460	LRR and NB-ARC domains-containing disease resistance protein
Medtr4g089025	2.7581	0.209479	13.1665	1.3687e-39	2.73509e-38	PF00067(Cytochrome P450)	AT3G48270	cytochrome P450, family 71, subfamily A, polypeptide 26
Medtr8g089740	2.75762	0.325516	8.47153	2.422e-17	1.86577e-16	PF02065(Melibiase)	AT3G26380	Melibiase family protein
Medtr5g090410	2.75636	0.149138	18.4819	2.8891e-76	1.6788e-74	PF01789(PsbP)	AT1G06680	photosystem II subunit P-1
Medtr1g098300	2.75585	1.18957	2.31667	0.0205216	0.0407585	PF00069(Protein kinase domain)	AT1G54610	Protein kinase superfamily protein
Medtr5g043280	2.7542	0.169002	16.2969	1.03889e-59	3.81504e-58
Medtr3g115180	2.75369	0.333923	8.24647	1.63148e-16	1.19468e-15		AT1G76250
Medtr5g079950	2.75191	0.23829	11.5486	7.5056e-31	1.08714e-29	PF01357(Pollen allergen), PF03330(Rare lipoprotein A (RlpA)-like double-psi beta-barrel)	AT2G39700	expansin A4
Medtr7g072575	2.7461	0.129512	21.2034	8.87629e-100	8.82714e-98	PF00069(Protein kinase domain), PF03822(NAF domain)	AT5G58380	SOS3-interacting protein 1
Medtr6g071040	2.74527	0.296695	9.25283	2.1862e-20	1.98493e-19		AT1G67920
Medtr8g008790	2.74371	0.820918	3.34224	0.000831055	0.0021314
Medtr7g029290	2.7432	0.451915	6.07017	1.27777e-09	5.92313e-09	PF01344(Kelch motif)	AT3G27150	Galactose oxidase/kelch repeat superfamily protein
Medtr4g020110	2.74092	0.314407	8.71774	2.8382e-18	2.30249e-17	PF00171(Aldehyde dehydrogenase family), PF00696(Amino acid kinase family)	AT3G55610	delta 1-pyrroline-5-carboxylate synthase 2
Medtr8g028265	2.74013	0.363306	7.54221	4.62084e-14	2.91483e-13	PF00612(IQ calmodulin-binding motif), PF02179(BAG domain)	AT2G46240	BCL-2-associated athanogene 6
Medtr4g007830	2.73917	0.438251	6.25023	4.09849e-10	1.96535e-09	PF02902(Ulp1 protease family, C-terminal catalytic domain)	AT3G06910	UB-like protease 1A
Medtr4g080290	2.73828	1.21303	2.25739	0.0239837	0.0469643	PF03101(FAR1 DNA-binding domain)	AT3G06250	FAR1-related sequence 7
Medtr5g065960	2.73614	0.598843	4.56905	4.89947e-06	1.6522e-05	PF00169(PH domain), PF00620(RhoGAP domain)	AT4G24580	Rho GTPase activation protein (RhoGAP) with PH domain
Medtr7g016780	2.73595	0.446121	6.13274	8.63774e-10	4.05159e-09	PF02797(Chalcone and stilbene synthases, C-terminal domain), PF00195(Chalcone and stilbene synthases, N-terminal domain)	AT5G13930	Chalcone and stilbene synthase family protein
Medtr2g102490	2.73355	0.528746	5.16988	2.34243e-07	8.95948e-07	PF02309(AUX/IAA family)	AT1G04250	AUX/IAA transcriptional regulator family protein
Medtr3g467370	2.72601	0.399375	6.82569	8.7505e-12	4.77483e-11	PF00398(Ribosomal RNA adenine dimethylase)	AT2G47420	Ribosomal RNA adenine dimethylase family protein
Medtr7g110810	2.72336	0.578703	4.70597	2.52661e-06	8.76975e-06	PF00010(Helix-loop-helix DNA-binding domain)	AT1G09530	phytochrome interacting factor 3
Medtr2g070550	2.72288	0.645473	4.21842	2.46018e-05	7.70448e-05	PF05678(VQ motif)	AT1G17147	VQ motif-containing protein
Medtr2g081980	2.72167	1.06668	2.55153	0.010725	0.0226636	PF01397(Terpene synthase, N-terminal domain), PF03936(Terpene synthase family, metal binding domain)	AT5G23960	terpene synthase 21
Medtr2g438140	2.714	0.128263	21.1597	2.2453e-99	2.21798e-97	PF00004(ATPase family associated with various cellular activities (AAA)), PF01434(Peptidase family M41)	AT2G30950	FtsH extracellular protease family
Medtr2g049020	2.71365	0.256656	10.5731	3.97156e-26	4.75544e-25	PF00083(Sugar (and other) transporter)	AT1G30220	inositol transporter 2
Medtr1g012630	2.7134	0.726805	3.73332	0.000188973	0.000530174	PF00234(Protease inhibitor/seed storage/LTP family)	AT2G45180	Bifunctional inhibitor/lipid-transfer protein/seed storage 2S albumin superfamily protein
Medtr8g103850	2.71171	0.203146	13.3485	1.20788e-40	2.50493e-39	PF04083(Partial alpha/beta-hydrolase lipase region)	AT1G73920	alpha/beta-Hydrolases superfamily protein
Medtr2g035100	2.71138	0.263581	10.2867	8.08946e-25	9.09106e-24	PF00407(Pathogenesis-related protein Bet v I family)	AT1G24020	MLP-like protein 423
Medtr1g116650	2.71039	0.175667	15.4291	1.04342e-53	3.29656e-52	PF00083(Sugar (and other) transporter)	AT2G43330	inositol transporter 1
Medtr4g087110	2.70973	0.396852	6.82806	8.60706e-12	4.70002e-11	PF03171(2OG-Fe(II) oxygenase superfamily)	AT3G19000	2-oxoglutarate (2OG) and Fe(II)-dependent oxygenase superfamily protein
Medtr7g023560	2.70445	0.31567	8.56731	1.05934e-17	8.30956e-17		AT2G28710	C2H2-type zinc finger family protein
Medtr8g445560	2.70368	0.280544	9.63728	5.56423e-22	5.47463e-21	PF02229(Transcriptional Coactivator p15 (PC4))	AT5G09250	ssDNA-binding transcriptional regulator
Medtr8g026960	2.70367	0.219167	12.3361	5.786e-35	9.80379e-34	PF02183(Homeobox associated leucine zipper), PF00046(Homeobox domain)	AT2G46680	homeobox 7
Medtr3g101900	2.70358	0.209695	12.8929	4.93595e-38	9.26976e-37	PF02458(Transferase family)	AT5G42830	HXXXD-type acyl-transferase family protein
Medtr2g025740	2.70317	0.411102	6.57543	4.85142e-11	2.49474e-10	PF02115(RHO protein GDP dissociation inhibitor)	AT3G07880	Immunoglobulin E-set superfamily protein
MT4Noble_030497	2.70307	0.854978	3.16156	0.00156925	0.00386092
Medtr4g036150	2.70204	0.794824	3.39955	0.000674968	0.00175554		AT4G13010	Oxidoreductase, zinc-binding dehydrogenase family protein
Medtr3g102400	2.70153	0.571315	4.72862	2.26047e-06	7.88477e-06	PF01453(D-mannose binding lectin), PF00954(S-locus glycoprotein domain), PF00069(Protein kinase domain)	AT2G19130	S-locus lectin protein kinase family protein
Medtr2g101370	2.70076	1.20364	2.24383	0.0248435	0.0484399	PF00230(Major intrinsic protein)	AT3G16240	delta tonoplast integral protein
Medtr5g019010	2.69562	0.639897	4.21259	2.52461e-05	7.8979e-05	PF00067(Cytochrome P450)	AT3G26300	cytochrome P450, family 71, subfamily B, polypeptide 34
Medtr2g072260	2.69484	0.186362	14.4603	2.15966e-47	5.72977e-46	PF00067(Cytochrome P450)	AT3G14690	cytochrome P450, family 72, subfamily A, polypeptide 15
Medtr0184s0010	2.6928	0.28182	9.55502	1.2356e-21	1.19429e-20		AT4G01070	UDP-Glycosyltransferase superfamily protein
Medtr5g032960	2.68636	0.113458	23.6772	6.19486e-124	9.87014e-122	PF00564(PB1 domain)	AT1G70640	octicosapeptide/Phox/Bem1p (PB1) domain-containing protein
MT4Noble_006160	2.68608	0.654434	4.10444	4.053e-05	0.000123864
Medtr8g030590	2.68265	0.673006	3.98607	6.71779e-05	0.000199801	PF00067(Cytochrome P450)	AT2G45970	cytochrome P450, family 86, subfamily A, polypeptide 8
Medtr3g086880	2.67558	0.651454	4.10708	4.00691e-05	0.000122506	PF01764(Lipase (class 3))	AT5G67050	alpha/beta-Hydrolases superfamily protein
Medtr8g445550	2.67012	0.479166	5.57244	2.5119e-08	1.0529e-07	PF02229(Transcriptional Coactivator p15 (PC4))	AT5G09250	ssDNA-binding transcriptional regulator
Medtr4g015600	2.66673	0.298461	8.93494	4.074e-19	3.44754e-18		AT3G47160	RING/U-box superfamily protein
Medtr1g105555	2.66645	0.172452	15.462	6.26385e-54	1.98746e-52		AT4G21215
Medtr5g006430	2.6644	0.972688	2.73921	0.0061587	0.0136652	PF07911(Protein of unknown function (DUF1677))	AT3G22540	Protein of unknown function (DUF1677)
Medtr7g013240	2.66028	0.264185	10.0698	7.51622e-24	8.07333e-23	PF00201(UDP-glucoronosyl and UDP-glucosyl transferase)	AT3G02100	UDP-Glycosyltransferase superfamily protein
Medtr2g099630	2.65873	0.509856	5.21466	1.8415e-07	7.11976e-07	PF12023(Domain of unknown function (DUF3511))	AT5G11970	Protein of unknown function (DUF3511)
Medtr7g089250	2.6574	0.88778	2.99331	0.00275969	0.00651674
Medtr5g013440	2.65621	0.243801	10.895	1.21747e-27	1.55449e-26	PF01357(Pollen allergen), PF03330(Rare lipoprotein A (RlpA)-like double-psi beta-barrel)	AT4G17030	expansin-like B1
Medtr1g111480	2.65565	0.726927	3.65325	0.00025894	0.000714467
Medtr5g013070	2.654	0.341813	7.76446	8.19927e-15	5.42863e-14	PF00069(Protein kinase domain), PF01453(D-mannose binding lectin)	AT5G60900	receptor-like protein kinase 1
Medtr2g435550	2.65385	1.17641	2.25589	0.0240774	0.0471291	PF00481(Protein phosphatase 2C)	AT3G05640	Protein phosphatase 2C family protein
Medtr7g076797	2.65072	0.852359	3.10987	0.0018717	0.00455064
Medtr8g027745	2.64975	0.500171	5.2977	1.17273e-07	4.62154e-07	PF00097(Zinc finger, C3HC4 type (RING finger))	AT2G46495	RING/U-box superfamily protein
Medtr2g089130	2.64861	0.765307	3.46085	0.000538474	0.00142137	PF03936(Terpene synthase family, metal binding domain), PF01397(Terpene synthase, N-terminal domain)	AT4G16730	terpene synthase 02
Medtr5g021240	2.6468	0.166117	15.9333	3.71923e-57	1.27717e-55	PF01565(FAD binding domain ), PF02913(FAD linked oxidases, C-terminal domain)	AT4G36400	FAD-linked oxidases family protein
Medtr1g115345	2.64602	0.237582	11.1373	8.25855e-29	1.10944e-27		AT2G37430	C2H2 and C2HC zinc fingers superfamily protein
Medtr4g478130	2.64373	0.226282	11.6833	1.55084e-31	2.30372e-30	PF00407(Pathogenesis-related protein Bet v I family)
Medtr7g050980	2.64344	0.533764	4.95245	7.32832e-07	2.67885e-06	PF01095(Pectinesterase), PF04043(Plant invertase/pectin methylesterase inhibitor)	AT1G11580	methylesterase PCR A
MT4Noble_049812	2.63961	0.612354	4.31059	1.62819e-05	5.19616e-05
Medtr8g096130	2.63642	0.375788	7.0157	2.288e-12	1.29671e-11	PF00923(Transaldolase)	AT5G13420	Aldolase-type TIM barrel family protein
Medtr1g106590	2.63413	0.295119	8.92565	4.43073e-19	3.74087e-18	PF03514(GRAS domain family)	AT1G50420	scarecrow-like 3
Medtr8g042780	2.63364	0.197179	13.3566	1.08403e-40	2.25599e-39	PF07690(Major Facilitator Superfamily)	AT5G13750	zinc induced facilitator-like 1
Medtr6g004440	2.63317	0.150922	17.4472	3.61813e-68	1.69122e-66	PF07714(Protein tyrosine kinase)	AT5G40540	Protein kinase superfamily protein
Medtr5g025800	2.63292	0.272475	9.663	4.32992e-22	4.28867e-21		AT5G45310
Medtr3g088520	2.62891	0.334968	7.84825	4.21899e-15	2.83772e-14	PF01301(Glycosyl hydrolases family 35)	AT1G77410	beta-galactosidase 16
Medtr5g006300	2.62767	1.09791	2.39333	0.0166961	0.0337809	PF01975(Survival protein SurE)	AT4G14930	Survival protein SurE-like phosphatase/nucleotidase
Medtr4g091550	2.62746	0.3547	7.40756	1.28645e-13	7.87521e-13	PF04749(PLAC8 family)	AT1G11380	PLAC8 family protein
Medtr2g034890	2.62509	0.905049	2.9005	0.0037257	0.00860136	PF06749(Protein of unknown function (DUF1218))	AT5G49320	Protein of unknown function (DUF1218)
Medtr4g106860	2.62475	0.182661	14.3695	8.03606e-47	2.10193e-45	PF02704(Gibberellin regulated protein)	AT5G14920	Gibberellin-regulated family protein
Medtr6g034030	2.62388	0.295864	8.86855	7.41066e-19	6.1759e-18	PF03595(Voltage-dependent anion channel)	AT5G24030	SLAC1 homologue 3
Medtr4g113600	2.62149	0.289844	9.04447	1.50394e-19	1.30855e-18		AT3G15630
Medtr2g012850	2.61827	0.675599	3.87548	0.000106415	0.0003093	PF00450(Serine carboxypeptidase)	AT1G11080	serine carboxypeptidase-like 31
Medtr6g090070	2.61676	0.167507	15.6218	5.17145e-55	1.6786e-53	PF03767(HAD superfamily, subfamily IIIB (Acid phosphatase))	AT4G29260	HAD superfamily, subfamily IIIB acid phosphatase
Medtr3g461480	2.61591	0.221107	11.831	2.69998e-32	4.12231e-31	PF01490(Transmembrane amino acid transporter protein)	AT5G23810	amino acid permease 7
Medtr6g021870	2.61415	0.32251	8.10564	5.24671e-16	3.74215e-15
Medtr7g106770	2.61304	0.238849	10.9402	7.40698e-28	9.54789e-27	PF00097(Zinc finger, C3HC4 type (RING finger))	AT5G22000	RING-H2 group F2A
Medtr4g070640	2.61233	0.40274	6.48639	8.79166e-11	4.43172e-10		AT5G66440
Medtr3g080370	2.61208	0.249875	10.4536	1.41139e-25	1.63769e-24	PF00646(F-box domain)	AT3G06240	F-box family protein
Medtr2g046620	2.61111	0.460117	5.67489	1.38776e-08	5.93539e-08	PF00201(UDP-glucoronosyl and UDP-glucosyl transferase)	AT2G22590	UDP-Glycosyltransferase superfamily protein
Medtr8g027200	2.61082	0.396306	6.58789	4.46114e-11	2.30404e-10	PF00004(ATPase family associated with various cellular activities (AAA))	AT2G46620	P-loop containing nucleoside triphosphate hydrolases superfamily protein
Medtr1g031280	2.61041	0.274903	9.49575	2.18635e-21	2.08403e-20	PF07714(Protein tyrosine kinase)	AT4G18250	receptor serine/threonine kinase, putative
Medtr3g034370	2.60937	0.46429	5.62011	1.90831e-08	8.06746e-08		AT1G01550	Protein of unknown function (DUF793)
Medtr2g101120	2.60733	0.367891	7.08724	1.36814e-12	7.88195e-12		AT1G52140
Medtr7g068850	2.60666	0.111502	23.3777	7.20711e-121	1.06791e-118	PF02770(Acyl-CoA dehydrogenase, middle domain), PF00441(Acyl-CoA dehydrogenase, C-terminal domain), PF02771(Acyl-CoA dehydrogenase, N-terminal domain)	AT3G51840	acyl-CoA oxidase 4
Medtr3g116920	2.60599	0.896676	2.90628	0.00365752	0.00845678	PF03087(Arabidopsis protein of unknown function)	AT2G17080	Arabidopsis protein of unknown function (DUF241)
Medtr4g128220	2.60563	0.119814	21.7473	7.32579e-105	7.95237e-103	PF09177(Syntaxin 6, N-terminal)	AT4G30240	Syntaxin/t-SNARE family protein
Medtr4g094918	2.60016	0.327426	7.9412	2.0024e-15	1.37395e-14	PF08246(Cathepsin propeptide inhibitor domain (I29)), PF00112(Papain family cysteine protease)	AT5G43060	Granulin repeat cysteine protease family protein
Medtr1g032250	2.5999	0.481357	5.40118	6.62051e-08	2.67337e-07	PF03171(2OG-Fe(II) oxygenase superfamily)	AT1G03410	2-oxoglutarate (2OG) and Fe(II)-dependent oxygenase superfamily protein
Medtr3g052330	2.59807	0.145152	17.899	1.20079e-71	6.15665e-70	PF04520(Senescence regulator)	AT4G21970	Protein of unknown function, DUF584
Medtr3g105540	2.59785	0.312966	8.30073	1.03471e-16	7.66397e-16
Medtr5g066730	2.59769	0.341146	7.61459	2.64531e-14	1.69098e-13	PF07707(BTB And C-terminal Kelch), PF00651(BTB/POZ domain), PF12248(Farnesoic acid 0-methyl transferase)	AT2G30600	BTB/POZ domain-containing protein
Medtr2g449880	2.59468	0.711062	3.64902	0.000263241	0.00072537	PF07983(X8 domain)	AT3G13560	O-Glycosyl hydrolases family 17 protein
Medtr4g036620	2.59427	0.239043	10.8527	1.93525e-27	2.4509e-26
Medtr1g022190	2.59414	0.256979	10.0948	5.8267e-24	6.29739e-23		AT1G75180	Erythronate-4-phosphate dehydrogenase family protein
Medtr1g085070	2.59184	0.14195	18.2588	1.76176e-74	9.68643e-73	PF03283(Pectinacetylesterase)	AT3G05910	Pectinacetylesterase family protein
Medtr2g089120	2.59099	0.3131	8.27529	1.28148e-16	9.44454e-16	PF03936(Terpene synthase family, metal binding domain), PF01397(Terpene synthase, N-terminal domain)	AT4G16730	terpene synthase 02
Medtr7g046380	2.5871	0.639392	4.04619	5.20584e-05	0.000156959	PF02902(Ulp1 protease family, C-terminal catalytic domain)
Medtr3g096840	2.58703	0.170987	15.13	1.02748e-51	3.05718e-50	PF01490(Transmembrane amino acid transporter protein)	AT5G09220	amino acid permease 2
Medtr8g463280	2.5865	0.194618	13.2901	2.64188e-40	5.40318e-39	PF04209(homogentisate 1,2-dioxygenase)	AT5G54080	homogentisate 1,2-dioxygenase
Medtr7g112860	2.58615	0.320294	8.07432	6.78537e-16	4.80718e-15	PF05564(Dormancy/auxin associated protein)	AT1G56220	Dormancy/auxin associated family protein
Medtr3g108320	2.58614	0.360037	7.18299	6.82029e-13	3.99603e-12	PF00520(Ion transport protein), PF00027(Cyclic nucleotide-binding domain)	AT4G32650	potassium channel in Arabidopsis thaliana 3
Medtr6g021900	2.58585	0.284577	9.08665	1.02137e-19	8.93657e-19
Medtr2g091190	2.58574	0.155678	16.6095	5.94566e-62	2.33377e-60	PF00010(Helix-loop-helix DNA-binding domain)	AT1G68810	basic helix-loop-helix (bHLH) DNA-binding superfamily protein
Medtr8g022380	2.5843	0.661469	3.90691	9.34845e-05	0.000273594	PF02519(Auxin responsive protein)	AT1G72430	SAUR-like auxin-responsive protein family
Medtr0011s0320	2.58419	0.271193	9.52899	1.58823e-21	1.52816e-20	PF00892(EamA-like transporter family), PF03151(Triose-phosphate Transporter family)	AT4G32390	Nucleotide-sugar transporter family protein
Medtr6g083780	2.58402	0.279072	9.25933	2.05711e-20	1.86945e-19	PF07714(Protein tyrosine kinase)	AT1G66920	Protein kinase superfamily protein
Medtr2g073250	2.5834	0.460845	5.60578	2.07314e-08	8.74557e-08	PF01453(D-mannose binding lectin), PF00069(Protein kinase domain)	AT4G32300	S-domain-2 5
Medtr1g064260	2.58337	0.191186	13.5123	1.32322e-41	2.83951e-40	PF03641(Possible lysine decarboxylase)	AT2G37210	lysine decarboxylase family protein
Medtr3g072110	2.58207	0.133306	19.3695	1.39741e-83	9.67579e-82	PF01490(Transmembrane amino acid transporter protein)	AT3G56200	Transmembrane amino acid transporter family protein
MT4Noble_036019	2.57681	0.832453	3.09545	0.00196517	0.00476187
Medtr6g079540	2.57518	0.276865	9.30121	1.38859e-20	1.2752e-19	PF07714(Protein tyrosine kinase)	AT1G18160	Protein kinase superfamily protein
Medtr7g079110	2.57396	0.272213	9.45571	3.2085e-21	3.03492e-20	PF00403(Heavy-metal-associated domain)	AT1G01490	Heavy metal transport/detoxification superfamily protein
Medtr4g007250	2.57274	0.651958	3.94618	7.94076e-05	0.000234317	PF02298(Plastocyanin-like domain)	AT5G15350	early nodulin-like protein 17
MT4Noble_037561	2.57106	0.877405	2.9303	0.00338636	0.00788024
Medtr7g024770	2.57026	0.874995	2.93745	0.00330919	0.00771398
Medtr4g116790	2.56923	0.234273	10.9669	5.51606e-28	7.14772e-27	PF00083(Sugar (and other) transporter)	AT4G02050	sugar transporter protein 7
MT4Noble_030189	2.56816	0.884478	2.90359	0.00368907	0.00852376
Medtr7g077330	2.56432	0.566204	4.52897	5.92709e-06	1.98116e-05	PF00562(RNA polymerase Rpb2, domain 6)	ATCG00190	RNA polymerase subunit beta
Medtr0549s0010	2.56427	0.729267	3.51623	0.000437726	0.00117213		AT4G27970	SLAC1 homologue 2
Medtr3g466180	2.56195	0.504624	5.07695	3.83543e-07	1.44151e-06	PF00141(Peroxidase)	AT5G05340	Peroxidase superfamily protein
Medtr1g113960	2.55852	0.148127	17.2724	7.58874e-67	3.43347e-65	PF01842(ACT domain), PF07714(Protein tyrosine kinase)	AT4G38470	ACT-like protein tyrosine kinase family protein
Medtr4g117040	2.55809	0.435155	5.87858	4.1381e-09	1.84105e-08	PF00704(Glycosyl hydrolases family 18), PF00069(Protein kinase domain)	AT3G16030	lectin protein kinase family protein
Medtr4g057493	2.55772	0.182077	14.0475	7.98172e-45	1.94522e-43		AT2G28130
Medtr2g035210	2.55399	0.304781	8.37976	5.30351e-17	4.00126e-16	PF00407(Pathogenesis-related protein Bet v I family)	AT1G24020	MLP-like protein 423
Medtr7g089330	2.54903	0.0938012	27.1748	1.28832e-162	4.2403e-160	PF00682(HMGL-like)	AT2G26800	Aldolase superfamily protein
Medtr4g071060	2.54785	0.29327	8.68773	3.69741e-18	2.97914e-17	PF00112(Papain family cysteine protease), PF08246(Cathepsin propeptide inhibitor domain (I29))	AT2G21430	Papain family cysteine protease
Medtr2g105000	2.5474	0.786682	3.23816	0.00120303	0.00301292
Medtr8g036075	2.54588	0.405554	6.27753	3.43997e-10	1.65978e-09	PF00036(EF hand)	AT1G24620	EF hand calcium-binding protein family
Medtr7g065265	2.54524	0.279704	9.09974	9.05511e-20	7.93695e-19	PF02798(Glutathione S-transferase, N-terminal domain), PF00043(Glutathione S-transferase, C-terminal domain)	AT3G09270	glutathione S-transferase TAU 8
MT4Noble_005413	2.54021	0.507028	5.01	5.44291e-07	2.01777e-06
Medtr1g083440	2.53615	0.237282	10.6883	1.15419e-26	1.414e-25	PF05564(Dormancy/auxin associated protein)	AT1G56220	Dormancy/auxin associated family protein
Medtr1g032380	2.53532	0.797192	3.18031	0.00147117	0.00363287	PF11955(Plant organelle RNA recognition domain)	AT3G63090	Ubiquitin carboxyl-terminal hydrolase family protein
Medtr0221s0030	2.53109	0.610634	4.14502	3.39791e-05	0.00010486	PF00560(Leucine Rich Repeat)	AT2G34930	disease resistance family protein / LRR family protein
Medtr8g469140	2.53052	0.266744	9.4867	2.38467e-21	2.26942e-20	PF01582(TIR domain)	AT4G16990	disease resistance protein (TIR-NBS class), putative
Medtr3g110320	2.53036	0.241589	10.4738	1.13956e-25	1.33324e-24	PF00704(Glycosyl hydrolases family 18)	AT4G19810	Glycosyl hydrolase family protein with chitinase insertion domain
Medtr8g010320	2.52961	0.243853	10.3735	3.27218e-25	3.73829e-24	PF00304(Gamma-thionin family)	AT2G02140	low-molecular-weight cysteine-rich 72
Medtr0562s0020	2.52918	0.248413	10.1814	2.4014e-24	2.64556e-23	PF01187(Macrophage migration inhibitory factor (MIF))	AT5G01650	Tautomerase/MIF superfamily protein
Medtr2g033650	2.52803	0.218897	11.549	7.47244e-31	1.08286e-29		AT3G17120
Medtr2g036380	2.52766	0.727117	3.47628	0.000508424	0.00134841	PF00702(haloacid dehalogenase-like hydrolase), PF00122(E1-E2 ATPase)	AT4G30110	heavy metal atpase 2
Medtr1g059760	2.52599	0.195485	12.9216	3.39808e-38	6.44288e-37	PF00668(Condensation domain)	AT3G52610
MT4Noble_008777	2.52539	0.622639	4.05594	4.99321e-05	0.000150932
Medtr8g007420	2.52468	0.837556	3.01434	0.00257542	0.00611106
Medtr1g067480	2.5231	0.587601	4.29391	1.75554e-05	5.5822e-05	PF03081(Exo70 exocyst complex subunit)	AT3G09520	exocyst subunit exo70 family protein H4
Medtr6g080430	2.52165	0.242333	10.4057	2.33437e-25	2.68552e-24		AT1G42550	plastid movement impaired1
Medtr1g079525	2.52162	0.105907	23.8097	2.6514e-125	4.31727e-123	PF02037(SAP domain)	AT3G04260	plastid transcriptionally active 3
Medtr8g469090	2.52151	0.304575	8.2788	1.24423e-16	9.17688e-16	PF01582(TIR domain)	AT4G16990	disease resistance protein (TIR-NBS class), putative
Medtr7g096370	2.52031	0.511938	4.92308	8.5192e-07	3.09433e-06
Medtr7g090470	2.5165	0.295769	8.50831	1.76482e-17	1.36804e-16	PF11815(Domain of unknown function (DUF3336)), PF01734(Patatin-like phospholipase)	AT5G04040	Patatin-like phospholipase family protein
Medtr3g065140	2.51565	0.514768	4.88696	1.02407e-06	3.69426e-06	PF04828(Glutathione-dependent formaldehyde-activating enzyme)	AT5G16940	carbon-sulfur lyases
Medtr2g017610	2.51288	0.530564	4.73624	2.17719e-06	7.60861e-06	PF00230(Major intrinsic protein)	AT4G18910	NOD26-like intrinsic protein 1;2
Medtr5g090920	2.51254	1.08522	2.31524	0.0206	0.0408924	PF00043(Glutathione S-transferase, C-terminal domain), PF02798(Glutathione S-transferase, N-terminal domain)	AT2G30860	glutathione S-transferase PHI 9
Medtr4g011060	2.51073	0.186487	13.4633	2.57137e-41	5.48221e-40		AT1G80180
MT4Noble_025172	2.50782	0.880662	2.84765	0.00440428	0.010037
Medtr5g082630	2.50628	0.715889	3.50093	0.000463629	0.00123569	PF00069(Protein kinase domain)	AT3G55950	CRINKLY4 related 3
Medtr3g101780	2.50522	0.223892	11.1894	4.59494e-29	6.24065e-28	PF00170(bZIP transcription factor)	AT1G45249	abscisic acid responsive elements-binding factor 2
Medtr5g055680	2.50238	0.215518	11.611	3.62357e-31	5.31081e-30	PF03171(2OG-Fe(II) oxygenase superfamily)	AT1G17020	senescence-related gene 1
Medtr8g083450	2.4989	0.757478	3.29897	0.000970389	0.00246211		AT1G67910
Medtr5g464810	2.49635	0.222632	11.2129	3.52349e-29	4.80749e-28	PF00201(UDP-glucoronosyl and UDP-glucosyl transferase)	AT1G22360	UDP-glucosyl transferase 85A2
Medtr3g012050	2.49498	0.467749	5.33401	9.60646e-08	3.81721e-07	PF00931(NB-ARC domain)	AT3G07040	NB-ARC domain-containing disease resistance protein
Medtr5g035690	2.4947	0.367929	6.78039	1.19854e-11	6.48151e-11	PF06880(Protein of unknown function (DUF1262))	AT1G13480	Protein of unknown function (DUF1262)
Medtr2g025120	2.49285	0.145583	17.1232	9.96252e-66	4.35456e-64	PF03171(2OG-Fe(II) oxygenase superfamily)	AT1G05010	ethylene-forming enzyme
Medtr2g039120	2.4926	0.163599	15.2361	2.03776e-52	6.19373e-51	PF01301(Glycosyl hydrolases family 35)	AT4G26140	beta-galactosidase 12
Medtr5g075440	2.4912	0.497364	5.00881	5.47689e-07	2.02961e-06	PF00201(UDP-glucoronosyl and UDP-glucosyl transferase)	AT2G30150	UDP-Glycosyltransferase superfamily protein
Medtr7g020980	2.49035	0.30057	8.28544	1.17674e-16	8.69429e-16	PF00847(AP2 domain)	AT5G13330	related to AP2 6l
Medtr1g112060	2.49028	0.53917	4.61873	3.86101e-06	1.31594e-05	PF08911(NUP50 (Nucleoporin 50 kDa))	AT1G52380	NUP50 (Nucleoporin 50 kDa) protein
Medtr5g088270	2.48795	0.0767606	32.4118	1.87256e-230	1.68162e-227	PF04739(5'-AMP-activated protein kinase beta subunit, interaction domain)	AT5G21170	5\'-AMP-activated protein kinase beta-2 subunit protein
Medtr5g064240	2.48722	0.223305	11.1382	8.17252e-29	1.09888e-27	PF00201(UDP-glucoronosyl and UDP-glucosyl transferase)	AT1G22360	UDP-glucosyl transferase 85A2
Medtr5g062320	2.48149	0.277907	8.92921	4.29078e-19	3.62581e-18	PF00933(Glycosyl hydrolase family 3 N terminal domain), PF01915(Glycosyl hydrolase family 3 C-terminal domain)	AT1G78060	Glycosyl hydrolase family protein
Medtr3g466480	2.48127	1.05531	2.35123	0.0187115	0.0374444	PF03822(NAF domain), PF00069(Protein kinase domain)	AT2G30360	SOS3-interacting protein 4
Medtr1g112300	2.48106	0.474338	5.23059	1.68973e-07	6.55949e-07	PF03407(Nucleotide-diphospho-sugar transferase)	AT1G14590	Nucleotide-diphospho-sugar transferase family protein
Medtr3g090660	2.48049	0.289388	8.57151	1.02138e-17	8.02882e-17	PF00069(Protein kinase domain), PF08263(Leucine rich repeat N-terminal domain), PF00560(Leucine Rich Repeat)	AT4G23740	Leucine-rich repeat protein kinase family protein
Medtr4g067280	2.48047	1.05177	2.35837	0.0183555	0.0368191
Medtr4g015680	2.47879	0.362886	6.83078	8.44563e-12	4.61442e-11		AT2G38250	Homeodomain-like superfamily protein
Medtr1g032040	2.47614	0.800491	3.09328	0.00197959	0.00479487	PF11955(Plant organelle RNA recognition domain)	AT3G63090	Ubiquitin carboxyl-terminal hydrolase family protein
Medtr5g007640	2.47588	0.234353	10.5647	4.3413e-26	5.18559e-25	PF00501(AMP-binding enzyme)	AT1G65060	4-coumarate:CoA ligase 3
Medtr7g018810	2.4749	0.805817	3.07129	0.00213134	0.00513681	PF02892(BED zinc finger), PF00931(NB-ARC domain)	AT4G27220	NB-ARC domain-containing disease resistance protein
Medtr7g050415	2.47315	0.856581	2.88723	0.00388649	0.00893738
Medtr8g089820	2.47295	0.361203	6.84644	7.57118e-12	4.15427e-11	PF05212(Protein of unknown function (DUF707))	AT1G67850	Protein of unknown function (DUF707)
Medtr1g023260	2.47267	0.117391	21.0635	1.71955e-98	1.62289e-96	PF00643(B-box zinc finger)	AT1G75540	salt tolerance homolog2
Medtr2g013980	2.47199	0.138152	17.8933	1.3299e-71	6.79509e-70	PF10374(Telomerase activating protein Est1)	AT1G28260	Telomerase activating protein Est1
Medtr1g492600	2.46959	0.360567	6.84918	7.42768e-12	4.07779e-11
Medtr0056s0160	2.46881	0.49215	5.01639	5.26525e-07	1.95509e-06	PF03171(2OG-Fe(II) oxygenase superfamily)	AT1G17020	senescence-related gene 1
Medtr7g069785	2.4667	0.772873	3.1916	0.00141488	0.00350439
Medtr2g039890	2.46581	0.197359	12.494	8.04833e-36	1.40219e-34		AT5G57000
Medtr8g068550	2.46501	0.179103	13.7631	4.24926e-43	9.69414e-42	PF00860(Permease family)	AT4G38050	Xanthine/uracil permease family protein
Medtr3g005295	2.46474	1.05276	2.34121	0.0192213	0.0383844
Medtr4g100880	2.46468	1.10161	2.23734	0.025264	0.0491724	PF03735(ENT domain)	AT3G12140	Emsy N Terminus (ENT)/ plant Tudor-like domains-containing protein
Medtr4g011460	2.46371	0.114699	21.4798	2.40505e-102	2.49209e-100	PF03219(TLC ATP/ADP transporter)	AT1G80300	nucleotide transporter 1
Medtr8g037270	2.46228	0.305402	8.06243	7.47928e-16	5.28363e-15	PF02045(CCAAT-binding transcription factor (CBF-B/NF-YA) subunit B)	AT5G12840	nuclear factor Y, subunit A1
Medtr4g072370	2.46065	0.338347	7.27254	3.52779e-13	2.09932e-12	PF02519(Auxin responsive protein)	AT4G38840	SAUR-like auxin-responsive protein family
MT4Noble_009591	2.45809	1.01965	2.41072	0.0159211	0.0323764
Medtr2g035220	2.45775	0.237203	10.3614	3.71589e-25	4.23215e-24	PF00407(Pathogenesis-related protein Bet v I family)	AT1G24020	MLP-like protein 423
Medtr1g029540	2.45675	0.204699	12.0017	3.47896e-33	5.54295e-32	PF00201(UDP-glucoronosyl and UDP-glucosyl transferase)	AT2G15490	UDP-glycosyltransferase 73B4
Medtr4g011250	2.4531	0.728857	3.36568	0.000763548	0.00197054		AT1G52690	Late embryogenesis abundant protein (LEA) family protein
Medtr4g018750	2.45301	0.156366	15.6876	1.83857e-55	6.02054e-54	PF00153(Mitochondrial carrier protein)	AT3G54110	plant uncoupling mitochondrial protein 1
Medtr3g103210	2.45275	0.593392	4.13345	3.57363e-05	0.000109928
Medtr7g103200	2.45149	0.478621	5.12199	3.02335e-07	1.1453e-06	PF04398(Protein of unknown function, DUF538)	AT1G09310	Protein of unknown function, DUF538
Medtr7g085850	2.44997	0.285869	8.57025	1.03261e-17	8.1128e-17
Medtr0184s0040	2.44969	0.232633	10.5303	6.26451e-26	7.42596e-25	PF00201(UDP-glucoronosyl and UDP-glucosyl transferase)	AT4G01070	UDP-Glycosyltransferase superfamily protein
Medtr4g111935	2.44901	0.49399	4.95762	7.13632e-07	2.60999e-06	PF03634(TCP family transcription factor)	AT3G18550	TCP family transcription factor
Medtr3g032980	2.44885	0.0843558	29.0301	2.74824e-185	1.31361e-182	PF05089(Alpha-N-acetylglucosaminidase (NAGLU) tim-barrel domain)	AT5G13690	alpha-N-acetylglucosaminidase family / NAGLU family
Medtr2g031530	2.44623	0.311814	7.84516	4.32387e-15	2.90496e-14	PF00069(Protein kinase domain)	AT1G16260	Wall-associated kinase family protein
Medtr2g072380	2.44608	0.178454	13.707	9.21387e-43	2.07015e-41	PF00067(Cytochrome P450)	AT3G14690	cytochrome P450, family 72, subfamily A, polypeptide 15
Medtr4g093070	2.4454	0.577045	4.2378	2.25722e-05	7.09736e-05	PF00069(Protein kinase domain), PF00139(Legume lectin domain)	AT5G10530	Concanavalin A-like lectin protein kinase family protein
Medtr2g005130	2.43956	0.414049	5.89195	3.81654e-09	1.7031e-08	PF00854(POT family)	AT1G59740	Major facilitator superfamily protein
Medtr3g095190	2.43617	0.619203	3.93436	8.34202e-05	0.000245424	PF00847(AP2 domain)	AT5G61890	Integrase-type DNA-binding superfamily protein
Medtr8g007075	2.43302	0.898758	2.70709	0.00678767	0.0149323
Medtr2g059350	2.431	0.143286	16.9661	1.46253e-64	6.1391e-63	PF10250(GDP-fucose protein O-fucosyltransferase)	AT5G15740	O-fucosyltransferase family protein
Medtr4g104540	2.42764	0.239121	10.1524	3.23474e-24	3.54125e-23	PF00067(Cytochrome P450)	AT3G48280	cytochrome P450, family 71, subfamily A, polypeptide 25
Medtr5g064845	2.42682	0.585504	4.14484	3.40058e-05	0.000104921
Medtr6g016375	2.42652	1.00688	2.40994	0.0159551	0.0324367	PF00170(bZIP transcription factor)	AT3G30530	basic leucine-zipper 42
Medtr7g111280	2.42593	0.699908	3.46607	0.000528117	0.00139652	PF03283(Pectinacetylesterase)	AT3G05910	Pectinacetylesterase family protein
Medtr5g039390	2.42537	0.262977	9.22276	2.89536e-20	2.61439e-19	PF01344(Kelch motif)	AT2G02870	Galactose oxidase/kelch repeat superfamily protein
Medtr6g071210	2.42359	0.163526	14.8208	1.07533e-49	3.03498e-48	PF01180(Dihydroorotate dehydrogenase)	AT3G17810	pyrimidine 1
Medtr4g033275	2.42263	0.471464	5.13853	2.76895e-07	1.0527e-06	PF01490(Transmembrane amino acid transporter protein)	AT5G41800	Transmembrane amino acid transporter family protein
Medtr2g081930	2.42101	0.218316	11.0895	1.41142e-28	1.87904e-27	PF00083(Sugar (and other) transporter)	AT3G20660	organic cation/carnitine transporter4
Medtr8g102550	2.4201	0.299905	8.06953	7.05673e-16	4.99585e-15	PF00481(Protein phosphatase 2C)	AT4G26080	Protein phosphatase 2C family protein
Medtr3g108910	2.41683	0.147103	16.4295	1.17624e-60	4.45185e-59		AT5G24890
Medtr4g013730	2.41438	0.205997	11.7205	1.00133e-31	1.49644e-30	PF01187(Macrophage migration inhibitory factor (MIF))	AT5G01650	Tautomerase/MIF superfamily protein
Medtr5g056140	2.41396	0.716844	3.36748	0.000758584	0.00195859	PF02265(S1/P1 Nuclease)	AT1G68290	endonuclease 2
Medtr5g084570	2.41217	0.180057	13.3967	6.31968e-41	1.32637e-39	PF07172(Glycine rich protein family)	AT2G05540	Glycine-rich protein family
Medtr0009s0050	2.41091	0.921298	2.61686	0.00887417	0.0190653	PF03171(2OG-Fe(II) oxygenase superfamily)	AT4G25310	2-oxoglutarate (2OG) and Fe(II)-dependent oxygenase superfamily protein
Medtr1g021730	2.40845	1.07181	2.24709	0.0246343	0.0480857	PF03372(Endonuclease/Exonuclease/phosphatase family)	AT1G47510	inositol polyphosphate 5-phosphatase 11
Medtr8g005750	2.40603	0.740048	3.25119	0.00114923	0.00288623	PF03106(WRKY DNA -binding domain)	AT3G56400	WRKY DNA-binding protein 70
MT4Noble_008800	2.40174	0.691986	3.47079	0.000518929	0.00137406
Medtr7g072270	2.39987	0.400945	5.98553	2.15689e-09	9.81867e-09	PF04525(LURP-one-related)	AT5G01750	Protein of unknown function (DUF567)
Medtr0058s0010	2.39764	0.113581	21.1096	6.49775e-99	6.31347e-97
Medtr4g101630	2.39735	0.24061	9.9636	2.19949e-23	2.30732e-22	PF08244(Glycosyl hydrolases family 32 C terminal), PF00251(Glycosyl hydrolases family 32 N-terminal domain)	AT1G12240	Glycosyl hydrolases family 32 protein
Medtr7g096930	2.39644	0.986271	2.4298	0.0151073	0.0308633	PF00249(Myb-like DNA-binding domain)	AT3G23250	myb domain protein 15
MT4Noble_029011	2.3925	0.341609	7.00361	2.49449e-12	1.41104e-11
Medtr5g032090	2.38805	0.113242	21.0881	1.02282e-98	9.7778e-97	PF00924(Mechanosensitive ion channel)	AT5G10490	MSCS-like 2
Medtr3g009400	2.38548	0.337973	7.05821	1.68658e-12	9.6583e-12	PF00069(Protein kinase domain), PF00560(Leucine Rich Repeat), PF08263(Leucine rich repeat N-terminal domain)	AT1G55610	BRI1 like
Medtr8g066240	2.38546	0.803202	2.96994	0.00297861	0.00700009	PF03110(SBP domain)	AT5G50670	Squamosa promoter-binding protein-like (SBP domain) transcription factor family protein
Medtr5g022210	2.38535	0.372414	6.4051	1.50266e-10	7.45046e-10	PF00226(DnaJ domain)	AT4G36040	Chaperone DnaJ-domain superfamily protein
Medtr1g484920	2.38464	0.173233	13.7655	4.11111e-43	9.40069e-42		AT5G26600	Pyridoxal phosphate (PLP)-dependent transferases superfamily protein
Medtr3g082440	2.38403	0.266334	8.95127	3.51425e-19	2.98409e-18	PF00759(Glycosyl hydrolase family 9)	AT1G65610	Six-hairpin glycosidases superfamily protein
Medtr8g090375	2.3831	0.127747	18.6549	1.15317e-77	6.93189e-76	PF01756(Acyl-CoA oxidase), PF02770(Acyl-CoA dehydrogenase, middle domain), PF00441(Acyl-CoA dehydrogenase, C-terminal domain)	AT5G65110	acyl-CoA oxidase 2
Medtr6g488290	2.38276	0.40181	5.93006	3.02829e-09	1.36202e-08		AT4G29060	elongation factor Ts family protein
MT4Noble_031927	2.38274	0.73261	3.2524	0.00114436	0.00287472
Medtr2g089210	2.38148	0.625849	3.8052	0.00014169	0.000404099		AT4G27280	Calcium-binding EF-hand family protein
Medtr7g076190	2.38139	0.0799377	29.7906	5.17048e-195	2.83754e-192		AT4G00755	F-box family protein
Medtr3g108730	2.38115	1.00229	2.37571	0.0175151	0.0352886	PF08555(Eukaryotic family of unknown function (DUF1754))	AT1G16810
Medtr8g103550	2.38047	0.411352	5.78694	7.16796e-09	3.1317e-08	PF00071(Ras family)	AT4G19640	Ras-related small GTP-binding family protein
Medtr7g090820	2.37756	0.518477	4.58566	4.52564e-06	1.53224e-05	PF00154(recA bacterial DNA recombination protein)	AT5G03990
Medtr7g015150	2.37326	1.04799	2.26459	0.0235381	0.0461648	PF03031(NLI interacting factor-like phosphatase)	AT4G26190	Haloacid dehalogenase-like hydrolase (HAD) superfamily protein
Medtr4g090580	2.37128	0.273417	8.67275	4.21815e-18	3.38858e-17	PF07992(Pyridine nucleotide-disulphide oxidoreductase), PF00070(Pyridine nucleotide-disulphide oxidoreductase)	AT1G07180	alternative NAD(P)H dehydrogenase 1
Medtr3g104560	2.37075	0.446825	5.30577	1.12196e-07	4.43089e-07	PF00067(Cytochrome P450)	AT2G26170	cytochrome P450, family 711, subfamily A, polypeptide 1
Medtr1g069275	2.36892	0.547452	4.32717	1.51036e-05	4.842e-05	PF00743(Flavin-binding monooxygenase-like)	AT4G28720	Flavin-binding monooxygenase family protein
Medtr7g086660	2.36715	0.476495	4.96784	6.77019e-07	2.48187e-06	PF03735(ENT domain)	AT2G44440	Emsy N Terminus (ENT) domain-containing protein
Medtr3g436860	2.36623	0.261924	9.03402	1.65484e-19	1.43437e-18	PF00646(F-box domain)	AT2G32560	F-box family protein
Medtr7g079020	2.36566	0.22703	10.4201	2.00817e-25	2.31474e-24	PF00781(Diacylglycerol kinase catalytic domain)	AT2G46090	Diacylglycerol kinase family protein
Medtr5g016090	2.36543	0.793606	2.98061	0.00287675	0.00677253		AT4G33910	2-oxoglutarate (2OG) and Fe(II)-dependent oxygenase superfamily protein
Medtr7g014630	2.36439	0.962883	2.45553	0.0140677	0.0289451	PF02458(Transferase family)	AT3G29590	HXXXD-type acyl-transferase family protein
Medtr6g084640	2.36088	0.278997	8.46202	2.62787e-17	2.02068e-16	PF00257(Dehydrin)	AT1G20440	cold-regulated 47
Medtr4g094560	2.35859	0.187384	12.5869	2.49127e-36	4.42354e-35	PF07712(Stress up-regulated Nod 19)	AT5G61820
Medtr2g013140	2.35848	0.27592	8.54771	1.2555e-17	9.8171e-17	PF12481(Aluminium induced protein ), PF12504()	AT4G27450	Aluminium induced protein with YGL and LRDR motifs
Medtr1g043700	2.35828	0.485231	4.86011	1.17318e-06	4.21216e-06
Medtr4g086750	2.3536	0.496454	4.74082	2.12853e-06	7.44645e-06	PF02298(Plastocyanin-like domain)	AT2G15780	Cupredoxin superfamily protein
Medtr5g006400	2.35255	0.697675	3.37198	0.000746301	0.00192939		AT3G22530
Medtr3g114910	2.35239	0.261804	8.9853	2.58018e-19	2.20929e-18	PF00097(Zinc finger, C3HC4 type (RING finger)), PF02182(SAD/SRA domain)	AT1G57820	Zinc finger (C3HC4-type RING finger) family protein
Medtr1g080800	2.34942	0.413254	5.68519	1.3067e-08	5.5984e-08	PF00967(Barwin family)	AT3G04720	pathogenesis-related 4
Medtr2g023010	2.34492	0.294509	7.96214	1.69088e-15	1.16669e-14		AT3G20340
Medtr8g032850	2.34468	0.384461	6.09862	1.06987e-09	4.98672e-09	PF00400(WD domain, G-beta repeat)	AT5G51980	Transducin/WD40 repeat-like superfamily protein
Medtr2g438260	2.34248	0.387273	6.04865	1.46066e-09	6.74039e-09
Medtr1g096140	2.34182	0.122342	19.1416	1.13645e-81	7.4346e-80	PF04853()	AT4G09510	cytosolic invertase 2
Medtr3g090530	2.34071	0.161503	14.4933	1.33498e-47	3.57381e-46	PF08718(Glycolipid transfer protein (GLTP))	AT3G21260	Glycolipid transfer protein (GLTP) family protein
Medtr3g051570	2.3397	0.33283	7.02971	2.06962e-12	1.17654e-11		AT3G20340
MT4Noble_039487	2.33649	0.649007	3.6001	0.000318091	0.000867454
Medtr3g057800	2.33565	0.356511	6.55143	5.69897e-11	2.91842e-10	PF00067(Cytochrome P450)	AT3G26300	cytochrome P450, family 71, subfamily B, polypeptide 34
Medtr3g109120	2.33546	0.157395	14.8382	8.29965e-50	2.35144e-48	PF00578(AhpC/TSA family), PF07649(C1-like domain)	AT4G31240	protein kinase C-like zinc finger protein
Medtr3g086580	2.33542	0.0844668	27.6489	2.87345e-168	1.00182e-165		AT3G26380	Melibiase family protein
Medtr2g017570	2.33492	0.23748	9.83208	8.19101e-23	8.38482e-22	PF00230(Major intrinsic protein)	AT4G18910	NOD26-like intrinsic protein 1;2
Medtr6g016135	2.3348	0.805014	2.90031	0.00372788	0.00860404	PF08263(Leucine rich repeat N-terminal domain), PF00560(Leucine Rich Repeat)	AT3G23120	receptor like protein 38
Medtr1g046200	2.33432	0.539646	4.32564	1.52088e-05	4.87308e-05	PF02362(B3 DNA binding domain)	AT3G06160	AP2/B3-like transcriptional factor family protein
Medtr5g078330	2.33295	0.212097	10.9994	3.84567e-28	5.02054e-27	PF00538(linker histone H1 and H5 family)	AT1G14900	high mobility group A
Medtr3g111610	2.33158	0.334982	6.96032	3.39489e-12	1.90762e-11	PF01151(GNS1/SUR4 family)	AT4G36830	GNS1/SUR4 membrane protein family
Medtr4g131990	2.33133	0.598824	3.89318	9.894e-05	0.000288591		AT4G21895	DNA binding
Medtr4g099180	2.33095	0.244641	9.52804	1.60283e-21	1.5417e-20	PF02493(MORN repeat)	AT4G17080	Histone H3 K4-specific methyltransferase SET7/9 family protein
Medtr2g008960	2.33087	0.169386	13.7607	4.39147e-43	1.00109e-41		AT5G64230
Medtr7g104270	2.33033	0.0915745	25.4474	7.54314e-143	1.63169e-140	PF01156(Inosine-uridine preferring nucleoside hydrolase)	AT2G36310	uridine-ribohydrolase 1
Medtr8g071280	2.32946	0.11164	20.8658	1.09529e-96	1.00492e-94	PF03141(Putative S-adenosyl-L-methionine-dependent methyltransferase)	AT4G19120	S-adenosyl-L-methionine-dependent methyltransferases superfamily protein
Medtr2g094093	2.32769	0.160069	14.5418	6.58669e-48	1.77937e-46	PF01344(Kelch motif)	AT5G60570	Galactose oxidase/kelch repeat superfamily protein
Medtr3g450760	2.32657	0.636569	3.65485	0.000257331	0.000710187		AT1G06660
Medtr4g025830	2.32554	0.164115	14.1702	1.40168e-45	3.4936e-44	PF02519(Auxin responsive protein)	AT3G60690	SAUR-like auxin-responsive protein family
Medtr4g057200	2.32223	0.11148	20.831	2.26874e-96	2.0624e-94	PF00355(Rieske [2Fe-2S] domain), PF08417(Pheophorbide a oxygenase)	AT3G44880	Pheophorbide a oxygenase family protein with Rieske [2Fe-2S] domain
Medtr4g104570	2.32103	0.246049	9.43319	3.97785e-21	3.74709e-20	PF00067(Cytochrome P450)	AT3G48280	cytochrome P450, family 71, subfamily A, polypeptide 25
Medtr5g007980	2.32026	0.162227	14.3025	2.11069e-46	5.43915e-45		AT3G03140	Tudor/PWWP/MBT superfamily protein
Medtr1g101500	2.318	0.536518	4.32045	1.55713e-05	4.98385e-05	PF01554(MatE)	AT4G23030	MATE efflux family protein
Medtr5g042990	2.31642	0.205007	11.2992	1.32405e-29	1.8439e-28	PF01287(Eukaryotic elongation factor 5A hypusine, DNA-binding OB fold), PF00467(KOW motif)	AT1G13950	eukaryotic elongation factor 5A-1
Medtr1g111540	2.31545	0.211552	10.9451	7.01615e-28	9.05196e-27	PF07690(Major Facilitator Superfamily), PF06813(Nodulin-like)	AT2G39210	Major facilitator superfamily protein
Medtr2g010590	2.31471	0.245863	9.41462	4.74801e-21	4.45417e-20	PF00188(Cysteine-rich secretory protein family)	AT2G14580	basic pathogenesis-related protein 1
Medtr0003s0580	2.30939	0.310638	7.43435	1.05083e-13	6.46758e-13	PF05633(Protein of unknown function (DUF793))	AT2G46080
Medtr6g085070	2.30926	0.193347	11.9436	7.01272e-33	1.09901e-31	PF04083(Partial alpha/beta-hydrolase lipase region)	AT1G73920	alpha/beta-Hydrolases superfamily protein
Medtr0903s0010	2.30756	0.863246	2.67312	0.00751494	0.0163766
Medtr7g014160	2.30629	0.229317	10.0572	8.53757e-24	9.15048e-23	PF02458(Transferase family)	AT5G39080	HXXXD-type acyl-transferase family protein
Medtr1g097580	2.30328	0.847757	2.71691	0.00658936	0.0145424	PF00069(Protein kinase domain), PF00560(Leucine Rich Repeat), PF08263(Leucine rich repeat N-terminal domain)	AT1G34110	Leucine-rich receptor-like protein kinase family protein
Medtr0078s0190	2.30269	0.247102	9.31879	1.17678e-20	1.08439e-19	PF00201(UDP-glucoronosyl and UDP-glucosyl transferase)	AT4G01070	UDP-Glycosyltransferase superfamily protein
Medtr4g035895	2.30216	0.581975	3.95577	7.62882e-05	0.000225516
Medtr7g085310	2.29954	0.175084	13.1339	2.10554e-39	4.17097e-38	PF00085(Thioredoxin)	AT1G08570	atypical CYS HIS rich thioredoxin 4
Medtr4g083140	2.2979	0.422624	5.43722	5.41178e-08	2.2036e-07
Medtr5g091830	2.29725	1.02129	2.24937	0.0244891	0.047837
Medtr6g072023	2.29321	0.799044	2.86994	0.00410553	0.0094017
MT4Noble_057127	2.29209	0.463145	4.94898	7.46019e-07	2.72342e-06
Medtr8g018980	2.2898	0.499914	4.58039	4.64107e-06	1.569e-05		AT3G13950
Medtr2g079990	2.28977	0.271917	8.42084	3.73806e-17	2.84482e-16	PF02365(No apical meristem (NAM) protein)	AT4G27410	NAC (No Apical Meristem) domain transcriptional regulator superfamily protein
Medtr8g031400	2.28949	0.204488	11.1962	4.25497e-29	5.78688e-28	PF00657(GDSL-like Lipase/Acylhydrolase)	AT1G53920	GDSL-motif lipase 5
Medtr3g111740	2.28844	0.203481	11.2464	2.41221e-29	3.31414e-28		AT1G75150
Medtr4g126350	2.28761	0.174586	13.1031	3.16258e-39	6.23574e-38	PF00320(GATA zinc finger)	AT5G56860	GATA type zinc finger transcription factor family protein
Medtr1g010170	2.28735	0.199838	11.446	2.46209e-30	3.50284e-29
Medtr6g022020	2.28639	0.437894	5.22135	1.77628e-07	6.87477e-07	PF00240(Ubiquitin family)	AT5G14360	Ubiquitin-like superfamily protein
Medtr4g073810	2.28449	0.630401	3.62387	0.000290232	0.000795139	PF00097(Zinc finger, C3HC4 type (RING finger))	AT4G35480	RING-H2 finger A3B
Medtr2g007210	2.28447	0.500192	4.56719	4.94305e-06	1.66652e-05	PF01105(emp24/gp25L/p24 family/GOLD)	AT1G09580	emp24/gp25L/p24 family/GOLD family protein
Medtr5g088760	2.28273	0.156754	14.5625	4.8641e-48	1.32124e-46	PF00808(Histone-like transcription factor (CBF/NF-Y) and archaeal histone)	AT5G19490	Histone superfamily protein
Medtr7g088410	2.28196	0.106058	21.5162	1.09875e-102	1.14654e-100	PF06964(Alpha-L-arabinofuranosidase C-terminus), PF02018(Carbohydrate binding domain)	AT3G10740	alpha-L-arabinofuranosidase 1
Medtr5g034590	2.28125	0.917793	2.48558	0.0129341	0.0268833	PF02705(K potassium transporter)	AT1G70300	K uptake permease 6
Medtr1g037690	2.28111	0.296772	7.68642	1.51305e-14	9.80524e-14
Medtr4g099260	2.28004	0.472121	4.82935	1.36977e-06	4.88486e-06	PF02705(K potassium transporter)	AT4G13420	high affinity K transporter 5
Medtr8g107030	2.27937	0.120052	18.9865	2.20428e-80	1.4018e-78	PF06966(Protein of unknown function (DUF1295))	AT1G18180	Protein of unknown function (DUF1295)
Medtr7g016720	2.27871	0.348613	6.5365	6.29755e-11	3.21274e-10	PF02797(Chalcone and stilbene synthases, C-terminal domain), PF00195(Chalcone and stilbene synthases, N-terminal domain)	AT5G13930	Chalcone and stilbene synthase family protein
Medtr4g044297	2.27693	0.174185	13.0719	4.76492e-39	9.32068e-38	PF05623(Protein of unknown function (DUF789))	AT4G03420	Protein of unknown function (DUF789)
Medtr4g086600	2.27409	0.121482	18.7196	3.42398e-78	2.09216e-76	PF00076(RNA recognition motif. (a.k.a. RRM, RBD, or RNP domain))	AT3G19130	RNA-binding protein 47B
Medtr5g018570	2.27276	0.223133	10.1857	2.29759e-24	2.53496e-23	PF00069(Protein kinase domain)	AT2G23450	Protein kinase superfamily protein
Medtr8g099495	2.27266	0.283226	8.02419	1.02194e-15	7.15116e-15	PF00097(Zinc finger, C3HC4 type (RING finger))	AT5G53110	RING/U-box superfamily protein
Medtr4g101780	2.27118	0.161457	14.0668	6.0742e-45	1.48277e-43		AT1G62790	Bifunctional inhibitor/lipid-transfer protein/seed storage 2S albumin superfamily protein
Medtr5g037070	2.26988	0.471848	4.81062	1.50464e-06	5.34395e-06		AT1G60560	SWIM zinc finger family protein
Medtr4g011660	2.26684	0.196035	11.5635	6.31133e-31	9.16844e-30	PF00646(F-box domain)	AT3G06240	F-box family protein
Medtr5g054900	2.26671	0.817475	2.77282	0.00555735	0.0124305	PF00170(bZIP transcription factor)	AT1G68640	bZIP transcription factor family protein
Medtr5g044250	2.26663	0.930065	2.43706	0.0148072	0.0303088		AT3G51740	inflorescence meristem receptor-like kinase 2
Medtr6g452990	2.26333	0.31816	7.11381	1.12885e-12	6.53004e-12	PF00183(Hsp90 protein), PF02518(Histidine kinase-, DNA gyrase B-, and HSP90-like ATPase)	AT5G52640	heat shock protein 90.1
Medtr8g461270	2.26273	0.388686	5.82148	5.83287e-09	2.56693e-08	PF00069(Protein kinase domain)	AT3G48750	cell division control 2
Medtr2g093760	2.26152	0.432521	5.2287	1.70707e-07	6.62422e-07
Medtr5g085800	2.26089	0.99083	2.28182	0.0225003	0.0443295		AT2G33580	Protein kinase superfamily protein
Medtr4g094772	2.25889	0.270321	8.35632	6.47034e-17	4.85563e-16	PF00067(Cytochrome P450)	AT4G37370	cytochrome P450, family 81, subfamily D, polypeptide 8
Medtr8g008820	2.25833	0.243681	9.26757	1.90435e-20	1.73316e-19	PF00069(Protein kinase domain)	AT5G47070	Protein kinase superfamily protein
Medtr4g072890	2.25742	0.555055	4.06703	4.76165e-05	0.00014433	PF02519(Auxin responsive protein)	AT4G38840	SAUR-like auxin-responsive protein family
Medtr1g019760	2.25541	0.132123	17.0706	2.45873e-65	1.06216e-63	PF00481(Protein phosphatase 2C)	AT1G47380	Protein phosphatase 2C family protein
Medtr2g461190	2.25448	0.387993	5.81063	6.22391e-09	2.73172e-08		AT5G25240
Medtr3g095620	2.25278	0.215923	10.4333	1.74745e-25	2.01702e-24	PF00069(Protein kinase domain)	AT1G49180	protein kinase family protein
Medtr8g014790	2.25254	0.980385	2.29761	0.0215841	0.0426829	PF07714(Protein tyrosine kinase), PF00560(Leucine Rich Repeat)	AT4G29990	Leucine-rich repeat transmembrane protein kinase protein
Medtr1g016120	2.25084	0.193996	11.6025	4.00046e-31	5.85739e-30	PF02535(ZIP Zinc transporter)	AT1G10970	zinc transporter 4 precursor
Medtr2g070870	2.2501	0.254062	8.85652	8.25518e-19	6.86426e-18	PF03171(2OG-Fe(II) oxygenase superfamily)	AT1G78440	Arabidopsis thaliana gibberellin 2-oxidase 1
Medtr8g104765	2.24886	0.227859	9.8695	5.64462e-23	5.8204e-22	PF04043(Plant invertase/pectin methylesterase inhibitor)	AT2G01610	Plant invertase/pectin methylesterase inhibitor superfamily protein
Medtr8g086260	2.24838	0.112774	19.937	1.94527e-88	1.52105e-86	PF05057(Putative serine esterase (DUF676))	AT1G29120	Hydrolase-like protein family
Medtr7g109390	2.24782	0.399266	5.62988	1.80339e-08	7.63367e-08	PF00933(Glycosyl hydrolase family 3 N terminal domain), PF01915(Glycosyl hydrolase family 3 C-terminal domain)	AT1G02640	beta-xylosidase 2
Medtr3g021430	2.24167	0.488136	4.59231	4.38375e-06	1.48641e-05	PF00891(O-methyltransferase), PF08100(Dimerisation domain)	AT5G54160	O-methyltransferase 1
Medtr4g125670	2.24043	0.63583	3.52364	0.000425669	0.00114078	PF01476(LysM domain)	AT5G20610
Medtr8g071160	2.23824	0.16747	13.365	9.67778e-41	2.01547e-39
Medtr7g100120	2.23764	0.732558	3.05456	0.00225392	0.00540718	PF01061(ABC-2 type transporter), PF00005(ABC transporter)	AT2G37360	ABC-2 type transporter family protein
Medtr4g023490	2.23704	0.886144	2.52447	0.0115874	0.0243179	PF00226(DnaJ domain), PF01556(DnaJ C terminal domain), PF00684(DnaJ central domain)	AT5G48030	gametophytic factor 2
Medtr0345s0020	2.23648	0.326693	6.84581	7.60423e-12	4.17163e-11		AT1G80630	RNI-like superfamily protein
Medtr1g043810	2.23538	0.557651	4.00856	6.10902e-05	0.000182611	PF03171(2OG-Fe(II) oxygenase superfamily)	AT1G06620	2-oxoglutarate (2OG) and Fe(II)-dependent oxygenase superfamily protein
Medtr1g070830	2.23416	0.206839	10.8014	3.38865e-27	4.2516e-26	PF02309(AUX/IAA family)	AT5G43700	AUX/IAA transcriptional regulator family protein
Medtr3g031000	2.23406	0.926805	2.41049	0.0159311	0.0323922	PF00097(Zinc finger, C3HC4 type (RING finger))	AT1G55530	RING/U-box superfamily protein
Medtr7g069410	2.23363	0.945762	2.36172	0.0181902	0.0365221
Medtr5g008210	2.2328	0.381365	5.85475	4.77733e-09	2.1175e-08		AT3G03150
Medtr1g013150	2.23242	0.226932	9.8374	7.76903e-23	7.95835e-22	PF00704(Glycosyl hydrolases family 18)	AT4G19810	Glycosyl hydrolase family protein with chitinase insertion domain
Medtr2g083210	2.23105	0.939288	2.37525	0.0175368	0.0353288	PF04833(COBRA-like protein)	AT3G20580	COBRA-like protein 10 precursor
Medtr7g098820	2.23059	0.651369	3.42447	0.000615999	0.00161136
Medtr1g106050	2.23049	0.867973	2.56977	0.0101767	0.0216129	PF00646(F-box domain)
Medtr7g091370	2.22879	0.245013	9.09661	9.31985e-20	8.16416e-19	PF00447(HSF-type DNA-binding)	AT2G41690	heat shock transcription factor B3
Medtr4g103550	2.22692	0.222085	10.0274	1.15551e-23	1.22869e-22	PF00571(CBS domain)	AT3G48530	SNF1-related protein kinase regulatory subunit gamma 1
Medtr6g080440	2.2257	0.273717	8.1314	4.24348e-16	3.04272e-15	PF02798(Glutathione S-transferase, N-terminal domain), PF00043(Glutathione S-transferase, C-terminal domain)	AT2G29420	glutathione S-transferase tau 7
Medtr5g027970	2.22026	0.130878	16.9644	1.5069e-64	6.31641e-63	PF00503(G-protein alpha subunit)	AT1G31930	extra-large GTP-binding protein 3
Medtr7g005900	2.22003	0.357566	6.20874	5.34094e-10	2.54386e-09	PF00097(Zinc finger, C3HC4 type (RING finger))	AT3G05870	anaphase-promoting complex/cyclosome 11
Medtr8g099920	2.21917	0.342951	6.4708	9.74855e-11	4.90323e-10	PF00550(Phosphopantetheine attachment site)	AT4G25050	acyl carrier protein 4
Medtr8g102350	2.21678	0.306786	7.22581	4.98137e-13	2.94011e-12		AT5G56550	oxidative stress 3
Medtr8g040080	2.2163	0.233569	9.48886	2.33584e-21	2.22438e-20	PF05678(VQ motif)	AT2G41180	VQ motif-containing protein
Medtr3g025230	2.21228	0.329193	6.72032	1.81329e-11	9.6458e-11	PF00067(Cytochrome P450)	AT5G07990	Cytochrome P450 superfamily protein
MT4Noble_017188	2.21094	0.906699	2.43845	0.0147504	0.0301988
Medtr5g036410	2.21064	0.309008	7.15398	8.42951e-13	4.90879e-12	PF01471(Putative peptidoglycan binding domain), PF00413(Matrixin)	AT1G70170	matrix metalloproteinase
Medtr1g029600	2.20982	0.721395	3.06326	0.00218939	0.00526731		AT1G11050	Protein kinase superfamily protein
Medtr1g088470	2.20654	0.234712	9.40106	5.4017e-21	5.04983e-20	PF12146(Serine aminopeptidase, S33)	AT3G62860	alpha/beta-Hydrolases superfamily protein
Medtr8g095470	2.20636	0.362268	6.09041	1.12622e-09	5.23539e-09	PF05678(VQ motif)	AT5G08480	VQ motif-containing protein
Medtr4g092110	2.20542	0.50514	4.36597	1.26563e-05	4.08438e-05	PF02679((2R)-phospho-3-sulfolactate synthase (ComA))	AT4G21320	Aldolase-type TIM barrel family protein
Medtr8g027160	2.20517	0.19697	11.1955	4.29025e-29	5.83218e-28	PF00702(haloacid dehalogenase-like hydrolase), PF00690(Cation transporter/ATPase, N-terminus), PF00122(E1-E2 ATPase)	AT4G00900	ER-type Ca2+ATPase 2
Medtr3g116320	2.20516	0.12323	17.8946	1.30002e-71	6.65391e-70	PF03181(BURP domain)	AT1G49320	unknown seed protein like 1
Medtr1g077790	2.20349	0.658564	3.3459	0.000820168	0.0021064	PF02298(Plastocyanin-like domain)	AT1G64640	early nodulin-like protein 8
Medtr7g028870	2.20314	0.36532	6.0307	1.63255e-09	7.49624e-09	PF11820(Protein of unknown function (DUF3339))	AT3G27027	Protein of unknown function (DUF 3339)
Medtr3g014180	2.20101	0.334689	6.57628	4.82349e-11	2.48124e-10
Medtr6g092620	2.19997	0.74512	2.9525	0.00315215	0.00737518	PF03171(2OG-Fe(II) oxygenase superfamily)	AT2G19590	ACC oxidase 1
Medtr1g027680	2.19826	0.31443	6.99125	2.7245e-12	1.53762e-11	PF00069(Protein kinase domain)	AT1G66910	Protein kinase superfamily protein
Medtr3g104660	2.19819	0.681148	3.22719	0.00125013	0.00312295	PF00069(Protein kinase domain), PF00582(Universal stress protein family)	AT5G12000	Protein kinase protein with adenine nucleotide alpha hydrolases-like domain
Medtr6g015815	2.19792	0.384629	5.71439	1.10098e-08	4.74239e-08	PF02458(Transferase family)	AT5G39090	HXXXD-type acyl-transferase family protein
Medtr2g089815	2.19757	0.423392	5.1904	2.09845e-07	8.06792e-07	PF12609(Wound-induced protein)	AT4G10265	Wound-responsive family protein
Medtr5g006070	2.19655	0.183831	11.9487	6.59477e-33	1.03625e-31	PF00083(Sugar (and other) transporter)	AT5G26340	Major facilitator superfamily protein
Medtr5g012270	2.19606	0.564992	3.88689	0.000101538	0.000295587	PF00854(POT family)	AT1G12110	nitrate transporter 1.1
Medtr4g011110	2.19518	0.460652	4.76537	1.88509e-06	6.63317e-06		AT5G11280
Medtr1g115400	2.19437	0.311109	7.05337	1.74638e-12	9.99111e-12	PF00646(F-box domain)	AT2G39490	F-box family protein
Medtr4g052000	2.19399	0.13184	16.6414	3.49598e-62	1.38322e-60	PF02319(E2F/DP family winged-helix DNA-binding domain)	AT5G22220	E2F transcription factor 1
Medtr4g113790	2.19396	0.401852	5.45962	4.77146e-08	1.9528e-07	PF00069(Protein kinase domain)	AT2G26700	AGC (cAMP-dependent, cGMP-dependent and protein kinase C) kinase family protein
Medtr3g095660	2.19212	0.107772	20.3404	5.6481e-92	4.75516e-90	PF07534(TLD)	AT5G39590	TLD-domain containing nucleolar protein
Medtr4g011090	2.19163	0.215055	10.1911	2.17397e-24	2.40036e-23	PF00646(F-box domain)	AT1G27340	Galactose oxidase/kelch repeat superfamily protein
Medtr8g041910	2.19156	0.603332	3.63243	0.000280767	0.000770777	PF07714(Protein tyrosine kinase), PF01657(Salt stress response/antifungal), PF11883(Domain of unknown function (DUF3403))	AT4G05200	cysteine-rich RLK (RECEPTOR-like protein kinase) 25
Medtr5g007760	2.19108	0.422901	5.18106	2.20626e-07	8.45939e-07	PF02797(Chalcone and stilbene synthases, C-terminal domain), PF00195(Chalcone and stilbene synthases, N-terminal domain)	AT5G13930	Chalcone and stilbene synthase family protein
Medtr6g061940	2.19013	0.451315	4.85276	1.21753e-06	4.36556e-06	PF00011(Hsp20/alpha crystallin family)	AT1G53540	HSP20-like chaperones superfamily protein
Medtr1g103870	2.1896	0.250417	8.74383	2.25336e-18	1.83356e-17	PF01063(Amino-transferase class IV)	AT3G54970	D-aminoacid aminotransferase-like PLP-dependent enzymes superfamily protein
Medtr5g015090	2.18942	0.545942	4.01035	6.06292e-05	0.000181325	PF00170(bZIP transcription factor)	AT3G49760	basic leucine-zipper 5
Medtr1g069345	2.18881	0.120876	18.1079	2.7596e-73	1.47353e-71	PF00400(WD domain, G-beta repeat)	AT5G43920	transducin family protein / WD-40 repeat family protein
Medtr5g018720	2.18815	0.366372	5.97247	2.33689e-09	1.0612e-08		AT4G37240
Medtr0101s0020	2.18795	0.781407	2.80001	0.00511012	0.0115084
Medtr5g064840	2.18789	0.257965	8.48133	2.2263e-17	1.71769e-16		AT2G14095
Medtr1g114750	2.18743	0.375617	5.82357	5.76036e-09	2.53615e-08	PF02893(GRAM domain)	AT5G23370	GRAM domain-containing protein / ABA-responsive protein-related
Medtr3g088570	2.18684	0.102079	21.423	8.16338e-102	8.34213e-100		AT1G21770	Acyl-CoA N-acyltransferases (NAT) superfamily protein
Medtr5g029230	2.18651	0.0635409	34.411	1.72785e-259	2.32749e-256	PF01553(Acyltransferase)	AT1G32200	phospholipid/glycerol acyltransferase family protein
Medtr1g071920	2.18511	0.281776	7.75476	8.85098e-15	5.84184e-14		AT4G14830
MT4Noble_000986	2.18501	0.240134	9.09914	9.10473e-20	7.97808e-19
Medtr0105s0110	2.1845	0.300521	7.26906	3.61998e-13	2.15245e-12		AT1G80630	RNI-like superfamily protein
Medtr8g077310	2.18404	0.0684325	31.9153	1.63846e-223	1.34877e-220	PF00083(Sugar (and other) transporter)	AT1G75220	Major facilitator superfamily protein
Medtr7g106150	2.183	0.911611	2.39467	0.0166355	0.0336767	PF00862(Sucrose synthase)	AT5G20830	sucrose synthase 1
Medtr8g036220	2.18286	0.326523	6.68516	2.3067e-11	1.21614e-10	PF00071(Ras family)	AT5G47960	RAB GTPase homolog A4C
Medtr6g081060	2.17951	0.217591	10.0165	1.28966e-23	1.36643e-22	PF03407(Nucleotide-diphospho-sugar transferase)	AT1G14590	Nucleotide-diphospho-sugar transferase family protein
Medtr6g027690	2.17929	0.228395	9.54172	1.40483e-21	1.35389e-20	PF00856(SET domain)	AT3G03750	SET domain protein 20
Medtr7g068770	2.17915	0.297324	7.32919	2.31549e-13	1.39584e-12		AT2G38250	Homeodomain-like superfamily protein
Medtr4g128410	2.17808	0.822696	2.6475	0.00810903	0.0175563	PF00722(Glycosyl hydrolases family 16), PF06955(Xyloglucan endo-transglycosylase (XET) C-terminus)	AT4G25810	xyloglucan endotransglycosylase 6
Medtr4g101025	2.17699	0.928253	2.34526	0.0190139	0.0379957		AT2G35730	Heavy metal transport/detoxification superfamily protein
Medtr7g116580	2.17606	0.864873	2.51604	0.0118682	0.0248473	PF00646(F-box domain)	AT1G48400	F-box/RNI-like/FBD-like domains-containing protein
Medtr2g034470	2.17486	0.144621	15.0383	4.11747e-51	1.20574e-49	PF00332(Glycosyl hydrolases family 17)	AT4G16260	Glycosyl hydrolase superfamily protein
Medtr2g098590	2.17124	0.73039	2.97271	0.00295182	0.00694099
Medtr2g055760	2.17063	0.669074	3.24422	0.00117771	0.00295349	PF00582(Universal stress protein family)	AT1G48960	Adenine nucleotide alpha hydrolases-like superfamily protein
MT4Noble_037237	2.1702	0.744126	2.91644	0.00354047	0.00820663
Medtr1g007860	2.1688	0.240053	9.03467	1.64491e-19	1.4266e-18	PF00561(alpha/beta hydrolase fold)	AT5G53050	alpha/beta-Hydrolases superfamily protein
Medtr7g076170	2.16788	0.18245	11.8821	1.46717e-32	2.25985e-31	PF03141(Putative S-adenosyl-L-methionine-dependent methyltransferase)	AT4G00750	S-adenosyl-L-methionine-dependent methyltransferases superfamily protein
Medtr5g009160	2.1659	0.258056	8.39313	4.73366e-17	3.58228e-16	PF01370(NAD dependent epimerase/dehydratase family)	AT4G10960	UDP-D-glucose/UDP-D-galactose 4-epimerase 5
Medtr4g021520	2.16582	0.296697	7.29977	2.88258e-13	1.72611e-12	PF00450(Serine carboxypeptidase)	AT5G09640	serine carboxypeptidase-like 19
Medtr2g012600	2.16546	0.146724	14.7587	2.70281e-49	7.5564e-48	PF00439(Bromodomain)	AT2G42150	DNA-binding bromodomain-containing protein
Medtr4g063410	2.16485	0.346281	6.25172	4.05949e-10	1.9476e-09	PF00125(Core histone H2A/H2B/H3/H4)	AT5G02560	histone H2A 12
Medtr7g109460	2.16455	0.343389	6.3035	2.91006e-10	1.41145e-09	PF00097(Zinc finger, C3HC4 type (RING finger)), PF12428(Protein of unknown function (DUF3675) )	AT1G02610	RING/FYVE/PHD zinc finger superfamily protein
MT4Noble_053305	2.16322	0.42388	5.10338	3.33632e-07	1.25999e-06
Medtr6g082280	2.1606	0.196164	11.0142	3.26286e-28	4.26909e-27		AT3G20180	Copper transport protein family
Medtr4g050700	2.16025	0.623402	3.46527	0.000529709	0.00140023	PF02519(Auxin responsive protein)	AT4G38840	SAUR-like auxin-responsive protein family
Medtr5g008020	2.15895	0.516987	4.17602	2.96649e-05	9.21409e-05	PF05348(Proteasome maturation factor UMP1)	AT1G67250	Proteasome maturation factor UMP1
Medtr3g080000	2.15892	0.476422	4.53152	5.85615e-06	1.95943e-05	PF00035(Double-stranded RNA binding motif), PF00636(Ribonuclease III domain)	AT4G15417	RNAse II-like 1
MT4Noble_013151	2.15803	0.333711	6.46677	1.0012e-10	5.03232e-10
Medtr8g028600	2.1573	0.293023	7.36224	1.80849e-13	1.09645e-12	PF00155(Aminotransferase class I and II)	AT3G61510	ACC synthase 1
Medtr3g068035	2.15473	0.172112	12.5194	5.84854e-36	1.02134e-34	PF03479(Domain of unknown function (DUF296))	AT3G55560	AT-hook protein of GA feedback 2
Medtr8g013830	2.15366	0.193595	11.1246	9.5233e-29	1.2753e-27		AT1G52155
Medtr4g062330	2.15319	0.28138	7.65223	1.97517e-14	1.27221e-13	PF03081(Exo70 exocyst complex subunit)	AT5G59730	exocyst subunit exo70 family protein H7
Medtr2g045490	2.14982	0.183454	11.7186	1.02372e-31	1.52837e-30	PF10436(Mitochondrial branched-chain alpha-ketoacid dehydrogenase kinase), PF02518(Histidine kinase-, DNA gyrase B-, and HSP90-like ATPase)	AT3G06483	pyruvate dehydrogenase kinase
Medtr2g012410	2.14975	0.557447	3.85641	0.000115062	0.00033267	PF02519(Auxin responsive protein)	AT4G38840	SAUR-like auxin-responsive protein family
Medtr2g086440	2.14886	0.562544	3.8199	0.000133507	0.000382233
Medtr1g099310	2.1479	0.415332	5.17152	2.32202e-07	8.88826e-07	PF00704(Glycosyl hydrolases family 18)	AT5G24090	chitinase A
Medtr5g011120	2.14775	0.223661	9.60269	7.78873e-22	7.59773e-21		AT4G22920	non-yellowing 1
Medtr7g068220	2.1476	0.166584	12.892	4.99236e-38	9.36976e-37		AT2G40070
Medtr2g056120	2.14755	0.0982029	21.8685	5.18056e-106	5.77165e-104	PF00501(AMP-binding enzyme)	AT5G23050	acyl-activating enzyme 17
Medtr6g038200	2.14737	0.865376	2.48143	0.0130856	0.0271468	PF00201(UDP-glucoronosyl and UDP-glucosyl transferase)	AT1G05680	Uridine diphosphate glycosyltransferase 74E2
Medtr3g064080	2.14604	0.185205	11.5874	4.77664e-31	6.97319e-30	PF01657(Salt stress response/antifungal), PF07714(Protein tyrosine kinase)	AT1G70530	cysteine-rich RLK (RECEPTOR-like protein kinase) 3
Medtr8g099420	2.14509	0.524187	4.09223	4.27242e-05	0.00013022	PF00501(AMP-binding enzyme)	AT4G23850	AMP-dependent synthetase and ligase family protein
Medtr2g437370	2.14488	0.121305	17.6818	5.79499e-70	2.82458e-68		AT3G62900	CW-type Zinc Finger
Medtr4g114105	2.14468	0.1764	12.158	5.19995e-34	8.52327e-33		AT5G20120
Medtr4g019130	2.14357	0.210194	10.1981	2.02289e-24	2.23855e-23	PF04832(SOUL heme-binding protein)	AT2G37970	SOUL heme-binding family protein
Medtr5g007713	2.14317	0.214597	9.98697	1.73809e-23	1.83108e-22	PF02797(Chalcone and stilbene synthases, C-terminal domain), PF00195(Chalcone and stilbene synthases, N-terminal domain)	AT5G13930	Chalcone and stilbene synthase family protein
Medtr7g111060	2.14295	0.0963647	22.2379	1.47623e-109	1.74295e-107	PF08127(Peptidase family C1 propeptide), PF00112(Papain family cysteine protease)	AT1G02305	Cysteine proteinases superfamily protein
Medtr7g051240	2.14087	0.105068	20.376	2.73199e-92	2.31984e-90	PF01266(FAD dependent oxidoreductase)	AT5G48440	FAD-dependent oxidoreductase family protein
Medtr5g017110	2.14034	0.613949	3.48619	0.00048995	0.00130142	PF00069(Protein kinase domain)	AT5G67080	mitogen-activated protein kinase kinase kinase 19
Medtr1g097935	2.13949	0.268812	7.95908	1.73325e-15	1.19481e-14	PF00195(Chalcone and stilbene synthases, N-terminal domain), PF02797(Chalcone and stilbene synthases, C-terminal domain)	AT5G13930	Chalcone and stilbene synthase family protein
Medtr4g088900	2.13933	0.574165	3.72599	0.000194554	0.000545055	PF00447(HSF-type DNA-binding)	AT4G17750	heat shock factor 1
Medtr2g022430	2.13878	0.445194	4.80416	1.55405e-06	5.5056e-06		AT1G03220	Eukaryotic aspartyl protease family protein
MT4Noble_046690	2.1376	0.666368	3.20784	0.00133735	0.00332739
Medtr4g023770	2.13739	0.817596	2.61424	0.00894259	0.0192011	PF08246(Cathepsin propeptide inhibitor domain (I29))	AT2G34080	Cysteine proteinases superfamily protein
Medtr1g073740	2.13607	0.138805	15.3889	1.94173e-53	6.10214e-52	PF03552(Cellulose synthase)	AT4G24000	cellulose synthase like G2
Medtr1g108700	2.13579	0.110891	19.2602	1.15895e-82	7.87738e-81
Medtr8g487700	2.13415	0.238918	8.93258	4.16176e-19	3.51779e-18		AT1G17870	ethylene-dependent gravitropism-deficient and yellow-green-like 3
Medtr3g088760	2.13373	0.314995	6.77385	1.25398e-11	6.77024e-11	PF07645(Calcium-binding EGF domain), PF00069(Protein kinase domain)	AT1G21270	wall-associated kinase 2
Medtr1g046650	2.13364	0.41272	5.1697	2.34468e-07	8.96691e-07	PF00240(Ubiquitin family), PF03145(Seven in absentia protein family)	AT5G37930	Protein with RING/U-box and TRAF-like domains
Medtr1g094130	2.13217	0.577733	3.69058	0.00022374	0.000621594
Medtr1g112170	2.12955	0.133108	15.9987	1.30534e-57	4.54568e-56	PF01842(ACT domain)	AT5G04740	ACT domain-containing protein
Medtr3g037730	2.12828	0.80287	2.65084	0.00802922	0.0174052
Medtr4g007850	2.12827	0.391286	5.43916	5.35331e-08	2.18099e-07		AT1G61350	ARM repeat superfamily protein
Medtr8g487730	2.12156	0.352342	6.0213	1.73023e-09	7.92265e-09
Medtr7g093870	2.12053	0.283018	7.49255	6.75499e-14	4.20997e-13	PF03018(Dirigent-like protein)	AT4G38700	Disease resistance-responsive (dirigent-like protein) family protein
Medtr0405s0060	2.12044	0.4239	5.00222	5.66726e-07	2.09884e-06		AT4G38900	Basic-leucine zipper (bZIP) transcription factor family protein
Medtr6g033450	2.1193	0.773809	2.73879	0.00616661	0.0136775	PF00407(Pathogenesis-related protein Bet v I family)
Medtr7g113110	2.11822	0.128381	16.4995	3.70017e-61	1.41672e-59	PF00403(Heavy-metal-associated domain)	AT5G27690	Heavy metal transport/detoxification superfamily protein
Medtr6g034310	2.11818	0.218405	9.69845	3.06121e-22	3.05058e-21	PF00664(ABC transporter transmembrane region), PF00005(ABC transporter)	AT3G59140	multidrug resistance-associated protein 14
Medtr1g015980	2.11808	0.284162	7.45379	9.06953e-14	5.60182e-13	PF08244(Glycosyl hydrolases family 32 C terminal), PF00251(Glycosyl hydrolases family 32 N-terminal domain)	AT3G13790	Glycosyl hydrolases family 32 protein
Medtr5g032720	2.11709	0.204247	10.3653	3.56532e-25	4.06535e-24	PF01554(MatE)	AT5G65380	MATE efflux family protein
Medtr1g022395	2.11637	0.221978	9.53413	1.51147e-21	1.45572e-20		AT1G19530
Medtr2g091260	2.11598	0.190256	11.1217	9.83265e-29	1.31613e-27	PF07899(Frigida-like protein)	AT5G27220	Frigida-like protein
Medtr6g011370	2.1151	0.476708	4.43689	9.12687e-06	2.99032e-05		AT1G17870	ethylene-dependent gravitropism-deficient and yellow-green-like 3
Medtr7g087410	2.11445	0.167725	12.6067	1.94066e-36	3.44999e-35	PF01554(MatE)	AT1G33110	MATE efflux family protein
Medtr5g069980	2.11233	0.592728	3.56374	0.00036561	0.0009884		AT1G07300	josephin protein-related
Medtr1g032340	2.1115	0.153775	13.7311	6.61259e-43	1.49477e-41	PF00930(Dipeptidyl peptidase IV (DPP IV) N-terminal region), PF07676(WD40-like Beta Propeller Repeat)	AT4G01870	tolB protein-related
Medtr7g063270	2.10948	0.287915	7.32674	2.35817e-13	1.42042e-12	PF00106(short chain dehydrogenase)	AT5G06060	NAD(P)-binding Rossmann-fold superfamily protein
Medtr7g101270	2.10901	0.662916	3.18142	0.00146557	0.00361935
Medtr7g113410	2.10562	0.187771	11.2138	3.4896e-29	4.76345e-28	PF00305(Lipoxygenase), PF01477(PLAT/LH2 domain)	AT1G55020	lipoxygenase 1
Medtr3g072560	2.10523	0.790506	2.66315	0.00774134	0.0168427	PF00892(EamA-like transporter family)	AT4G08290	nodulin MtN21 /EamA-like transporter family protein
Medtr3g094690	2.1037	0.864973	2.4321	0.0150114	0.0306908	PF03195(Protein of unknown function DUF260), PF05308(Mitochondrial fission regulator)	AT2G40470	LOB domain-containing protein 15
Medtr2g068950	2.10179	0.939591	2.23692	0.0252918	0.0492135	PF03171(2OG-Fe(II) oxygenase superfamily)	AT1G06620	2-oxoglutarate (2OG) and Fe(II)-dependent oxygenase superfamily protein
Medtr5g026620	2.10116	0.150994	13.9155	5.10014e-44	1.20432e-42	PF01786(Alternative oxidase)	AT3G22370	alternative oxidase 1A
Medtr4g022570	2.09758	0.148594	14.1162	3.01949e-45	7.41977e-44	PF00957(Synaptobrevin)	AT1G04760	vesicle-associated membrane protein 726
Medtr5g010160	2.09677	0.425794	4.92437	8.46316e-07	3.07435e-06	PF12043(Domain of unknown function (DUF3527))	AT1G63520	Protein of unknown function (DUF3527)
Medtr2g075250	2.09594	0.191276	10.9577	6.10616e-28	7.89856e-27	PF11721(Di-glucose binding within endoplasmic reticulum), PF07714(Protein tyrosine kinase), PF00560(Leucine Rich Repeat)	AT1G53430	Leucine-rich repeat transmembrane protein kinase
Medtr2g064400	2.0916	0.330814	6.32257	2.57249e-10	1.25408e-09	PF00646(F-box domain)	AT3G60790	F-box family protein
Medtr8g445800	2.09158	0.181408	11.5297	9.34919e-31	1.34955e-29	PF11721(Di-glucose binding within endoplasmic reticulum), PF07714(Protein tyrosine kinase), PF00560(Leucine Rich Repeat)	AT1G56130	Leucine-rich repeat transmembrane protein kinase
Medtr8g096970	2.09136	0.32469	6.4411	1.18608e-10	5.92942e-10
Medtr4g103970	2.09113	0.475894	4.3941	1.1123e-05	3.61239e-05		AT5G50335
Medtr8g069450	2.08993	0.243778	8.57309	1.0074e-17	7.92314e-17		AT3G26580	Tetratricopeptide repeat (TPR)-like superfamily protein
Medtr4g130850	2.08633	0.585413	3.56385	0.000365452	0.000988065
Medtr5g005230	2.08605	0.368937	5.65421	1.56561e-08	6.66525e-08		AT4G33800
Medtr2g044940	2.08577	0.881081	2.36729	0.017919	0.036024		AT1G48330
Medtr7g028970	2.08431	0.578436	3.60336	0.000314126	0.000857282	PF02861(Clp amino terminal domain, pathogenicity island component), PF00004(ATPase family associated with various cellular activities (AAA)), PF07724(AAA domain (Cdc48 subfamily)), PF10431(C-terminal, D2-small domain, of ClpB protein )	AT1G74310	heat shock protein 101
Medtr7g050405	2.08346	0.876602	2.37675	0.017466	0.0351993
MT4Noble_003252	2.08192	0.932358	2.23296	0.0255514	0.0496796
Medtr1g032010	2.08182	0.166243	12.5227	5.60799e-36	9.81647e-35	PF00930(Dipeptidyl peptidase IV (DPP IV) N-terminal region), PF07676(WD40-like Beta Propeller Repeat)	AT4G01870	tolB protein-related
Medtr4g072550	2.08152	0.925853	2.24822	0.0245623	0.0479609	PF02519(Auxin responsive protein)	AT4G38840	SAUR-like auxin-responsive protein family
Medtr3g112530	2.08105	0.386764	5.38067	7.42109e-08	2.98081e-07	PF03595(Voltage-dependent anion channel)	AT1G62280	SLAC1 homologue 1
Medtr7g068380	2.08047	0.173775	11.9722	4.9699e-33	7.85928e-32	PF01699(Sodium/calcium exchanger protein)	AT3G51860	cation exchanger 3
Medtr3g103510	2.08042	0.375767	5.53647	3.08632e-08	1.28297e-07	PF08491(Squalene epoxidase)	AT1G58440	FAD/NAD(P)-binding oxidoreductase family protein
Medtr7g066640	2.08032	0.288933	7.20001	6.02102e-13	3.53753e-12	PF00560(Leucine Rich Repeat)	AT1G54470	RNI-like superfamily protein
Medtr3g100470	2.07969	0.191679	10.8498	1.9977e-27	2.52783e-26	PF03479(Domain of unknown function (DUF296))	AT5G49700	Predicted AT-hook DNA-binding family protein
Medtr8g028565	2.07962	0.288003	7.22082	5.16752e-13	3.04513e-12	PF03106(WRKY DNA -binding domain)	AT4G01250	WRKY family transcription factor
Medtr4g071120	2.0792	0.211959	9.80946	1.02516e-22	1.04437e-21		AT4G34630
MT4Noble_022504	2.07849	0.61794	3.36358	0.000769378	0.0019849
Medtr1g072280	2.07823	0.140761	14.7642	2.49287e-49	6.97604e-48	PF08356(EF hand associated), PF08477(Ras of Complex, Roc, domain of DAPkinase), PF08355(EF hand associated)	AT3G63150	MIRO-related GTP-ase 2
Medtr8g088250	2.07705	0.784577	2.64735	0.00811242	0.0175624	PF00644(Poly(ADP-ribose) polymerase catalytic domain), PF12174(RCD1-SRO-TAF4 (RST) plant domain)	AT1G23550	similar to RCD one 2
Medtr1g019290	2.07538	0.171994	12.0665	1.58649e-33	2.56076e-32	PF00397(WW domain), PF09445(RNA cap guanine-N2 methyltransferase)	AT1G45231	S-adenosyl-L-methionine-dependent methyltransferases superfamily protein
Medtr8g027265	2.07337	0.142327	14.5677	4.50807e-48	1.22678e-46	PF00069(Protein kinase domain)	AT1G64630	with no lysine (K) kinase 10
Medtr1g112220	2.07323	0.919974	2.25357	0.0242231	0.0473829
Medtr2g014740	2.07308	0.515731	4.0197	5.82734e-05	0.000174685
Medtr3g048920	2.07068	0.129867	15.9446	3.10436e-57	1.0685e-55	PF00285(Citrate synthase)	AT2G42790	citrate synthase 3
Medtr8g075510	2.07046	0.569453	3.63587	0.000277039	0.000760964	PF00314(Thaumatin family)	AT4G38660	Pathogenesis-related thaumatin superfamily protein
Medtr4g057310	2.07039	0.289352	7.15525	8.35175e-13	4.86447e-12	PF00097(Zinc finger, C3HC4 type (RING finger)), PF05495(CHY zinc finger)	AT5G22920	CHY-type/CTCHY-type/RING-type Zinc finger protein
Medtr7g016800	2.06695	0.299314	6.90564	4.99769e-12	2.77717e-11	PF02797(Chalcone and stilbene synthases, C-terminal domain), PF00195(Chalcone and stilbene synthases, N-terminal domain)	AT5G13930	Chalcone and stilbene synthase family protein
Medtr8g464780	2.06542	0.306757	6.73309	1.66093e-11	8.86875e-11	PF00609(Diacylglycerol kinase accessory domain), PF00781(Diacylglycerol kinase catalytic domain)	AT2G20900	diacylglycerol kinase 5
Medtr6g033980	2.06464	0.556504	3.71002	0.000207246	0.000578428
MT4Noble_000265	2.06422	0.215809	9.56503	1.1217e-21	1.08633e-20
Medtr4g089135	2.0618	0.296327	6.95783	3.4555e-12	1.9402e-11	PF02365(No apical meristem (NAM) protein)	AT1G61110	NAC domain containing protein 25
Medtr2g093030	2.06086	0.669327	3.079	0.00207694	0.00501264
Medtr4g089020	2.06074	0.223991	9.2001	3.57625e-20	3.20963e-19	PF00067(Cytochrome P450)	AT3G48280	cytochrome P450, family 71, subfamily A, polypeptide 25
Medtr1g069140	2.05962	0.169244	12.1695	4.51571e-34	7.43462e-33	PF00076(RNA recognition motif. (a.k.a. RRM, RBD, or RNP domain))	AT5G51120	polyadenylate-binding protein 1
Medtr4g130970	2.05839	0.247239	8.3255	8.39755e-17	6.25594e-16	PF02214(BTB/POZ domain)	AT2G24240	BTB/POZ domain with WD40/YVTN repeat-like protein
Medtr7g108080	2.05836	0.211385	9.73751	2.08609e-22	2.09705e-21
Medtr1g100395	2.05551	0.238023	8.63579	5.8325e-18	4.65642e-17	PF00106(short chain dehydrogenase)	AT4G11410	NAD(P)-binding Rossmann-fold superfamily protein
Medtr8g464760	2.05542	0.181932	11.2977	1.34728e-29	1.87537e-28	PF06764(Protein of unknown function (DUF1223))	AT5G54240	Protein of unknown function (DUF1223)
Medtr4g011970	2.05443	0.365068	5.62754	1.82798e-08	7.73557e-08	PF00916(Sulfate permease family), PF01740(STAS domain)	AT3G15990	sulfate transporter 3;4
Medtr2g031390	2.05134	0.264518	7.75502	8.83269e-15	5.83107e-14	PF01565(FAD binding domain ), PF08031(Berberine and berberine like )	AT1G30760	FAD-binding Berberine family protein
Medtr2g100690	2.04787	0.721468	2.83848	0.00453288	0.0103063
Medtr8g071170	2.04507	0.169736	12.0485	1.97442e-33	3.18173e-32
Medtr8g074050	2.04502	0.0983544	20.7923	5.07826e-96	4.57429e-94	PF03171(2OG-Fe(II) oxygenase superfamily)	AT1G49390	2-oxoglutarate (2OG) and Fe(II)-dependent oxygenase superfamily protein
Medtr8g036830	2.0449	0.216241	9.4566	3.18125e-21	3.0101e-20
Medtr4g007990	2.04421	0.0795326	25.7027	1.08903e-145	2.62385e-143	PF01243(Pyridoxamine 5'-phosphate oxidase)	AT1G51560	Pyridoxamine 5\'-phosphate oxidase family protein
Medtr7g112420	2.04338	0.316804	6.44998	1.11865e-10	5.60461e-10	PF00225(Kinesin motor domain)	AT5G27000	kinesin 4
Medtr2g055920	2.04233	0.553278	3.69132	0.000223094	0.000619972		AT5G43970	translocase of outer membrane 22-V
Medtr4g083070	2.04109	0.221764	9.20389	3.45227e-20	3.10119e-19	PF07983(X8 domain)	AT1G18650	plasmodesmata callose-binding protein 3
Medtr0009s0500	2.04018	0.465339	4.38429	1.16364e-05	3.77334e-05
Medtr2g059240	2.0389	0.191735	10.6339	2.07244e-26	2.5109e-25	PF00201(UDP-glucoronosyl and UDP-glucosyl transferase)	AT1G73880	UDP-glucosyl transferase 89B1
Medtr3g110710	2.0376	0.0857438	23.7638	7.90651e-125	1.28038e-122	PF02782(FGGY family of carbohydrate kinases, C-terminal domain), PF00370(FGGY family of carbohydrate kinases, N-terminal domain)	AT5G49650	xylulose kinase-2
Medtr3g062950	2.03742	0.698862	2.91534	0.00355306	0.0082339	PF01230(HIT domain)	AT5G58240	FRAGILE HISTIDINE TRIAD
Medtr1155s0010	2.03579	0.343352	5.92918	3.04458e-09	1.36893e-08		AT1G80630	RNI-like superfamily protein
Medtr5g048550	2.03578	0.203935	9.98251	1.8181e-23	1.91401e-22	PF03171(2OG-Fe(II) oxygenase superfamily)	AT1G17020	senescence-related gene 1
Medtr8g089715	2.03526	0.319396	6.37223	1.86295e-10	9.17086e-10	PF05875(Ceramidase)	AT1G71190	senescence associated gene 18
Medtr5g092860	2.03489	0.454892	4.47335	7.70051e-06	2.54267e-05	PF07734(F-box associated)	AT4G12560	F-box and associated interaction domains-containing protein
Medtr2g008120	2.03382	0.120038	16.9431	2.16556e-64	9.0262e-63	PF00282(Pyridoxal-dependent decarboxylase conserved domain)	AT1G43710	Pyridoxal phosphate (PLP)-dependent transferases superfamily protein
Medtr4g085100	2.0332	0.27592	7.3688	1.72175e-13	1.04622e-12		AT2G01340
Medtr1g066950	2.02943	0.442746	4.58372	4.56772e-06	1.54561e-05	PF07714(Protein tyrosine kinase)	AT2G37050	Leucine-rich repeat protein kinase family protein
Medtr3g031470	2.02921	0.500785	4.05206	5.07694e-05	0.000153275	PF00954(S-locus glycoprotein domain), PF00069(Protein kinase domain), PF01453(D-mannose binding lectin)	AT2G19130	S-locus lectin protein kinase family protein
Medtr7g018320	2.02885	0.152823	13.2758	3.19879e-40	6.51969e-39	PF08132(S-adenosyl-l-methionine decarboxylase leader peptide), PF01536(Adenosylmethionine decarboxylase)	AT5G15950	Adenosylmethionine decarboxylase family protein
Medtr2g056140	2.0287	0.307838	6.59014	4.39417e-11	2.27183e-10
Medtr8g085650	2.02814	0.217566	9.32193	1.14248e-20	1.05409e-19	PF01344(Kelch motif)	AT2G44130	Galactose oxidase/kelch repeat superfamily protein
MT4Noble_005414	2.02645	0.261913	7.73712	1.01693e-14	6.68367e-14
Medtr2g451510	2.02588	0.249511	8.11941	4.68452e-16	3.35004e-15	PF03662(Glycosyl hydrolase family 79, N-terminal domain )	AT5G34940	glucuronidase 3
Medtr3g082180	2.0253	0.458764	4.4147	1.01152e-05	3.29591e-05	PF01699(Sodium/calcium exchanger protein)	AT1G55730	cation exchanger 5
Medtr4g083980	2.0239	0.0774526	26.1308	1.63065e-150	4.43344e-148	PF02450(Lecithin:cholesterol acyltransferase)	AT4G19860	alpha/beta-Hydrolases superfamily protein
Medtr8g058563	2.02341	0.244819	8.26495	1.39754e-16	1.02821e-15	PF04263(Thiamin pyrophosphokinase, catalytic domain), PF04265(Thiamin pyrophosphokinase, vitamin B1 binding domain)	AT1G02880	thiamin pyrophosphokinase1
Medtr2g026670	2.02316	0.156684	12.9124	3.83279e-38	7.23931e-37	PF00403(Heavy-metal-associated domain)	AT4G16380	Heavy metal transport/detoxification superfamily protein
Medtr3g466420	2.02304	0.517128	3.91207	9.1507e-05	0.000268177		AT5G58375	Methyltransferase-related protein
Medtr3g108890	2.02267	0.263714	7.66995	1.72058e-14	1.1133e-13		AT5G10695
Medtr8g019480	2.02222	0.12649	15.9873	1.56757e-57	5.43331e-56	PF00153(Mitochondrial carrier protein)	AT1G72820	Mitochondrial substrate carrier family protein
Medtr2g089945	2.02197	0.158915	12.7236	4.37046e-37	7.93618e-36	PF12609(Wound-induced protein)	AT4G10265	Wound-responsive family protein
Medtr3g105200	2.01742	0.125311	16.0992	2.58266e-58	9.17713e-57	PF00612(IQ calmodulin-binding motif), PF00063(Myosin head (motor domain)), PF01843(DIL domain)	AT4G33200	myosin, putative
Medtr1g111430	2.01533	0.685708	2.93904	0.00329229	0.00767881
MT4Noble_000353	2.01526	0.808754	2.4918	0.0127096	0.0264687
Medtr6g083000	2.01521	0.284435	7.08494	1.39109e-12	8.00641e-12		AT5G38260	Protein kinase superfamily protein
Medtr2g090340	2.01486	0.140112	14.3804	6.87399e-47	1.79956e-45		AT4G28290
Medtr6g069300	2.01426	0.333468	6.04033	1.53803e-09	7.08085e-09	PF01535(PPR repeat)	AT1G62670	rna processing factor 2
Medtr1g063900	2.01377	0.133402	15.0955	1.73417e-51	5.11364e-50	PF02338(OTU-like cysteine protease)	AT5G03330	Cysteine proteinases superfamily protein
Medtr4g098900	2.01272	0.169195	11.8959	1.24329e-32	1.919e-31	PF03151(Triose-phosphate Transporter family)	AT4G18210	purine permease 10
Medtr3g093590	2.01187	0.0871876	23.0752	8.22429e-118	1.13361e-115	PF00400(WD domain, G-beta repeat)	AT3G56440	homolog of yeast autophagy 18 (ATG18) D
Medtr3g101590	2.01185	0.122886	16.3717	3.04667e-60	1.1357e-58	PF08235(LNS2 (Lipin/Ned1/Smp2)), PF04571(lipin, N-terminal conserved region)	AT5G42870	phosphatidic acid phosphohydrolase 2
Medtr4g114210	2.01146	0.574564	3.50084	0.000463789	0.00123589	PF00141(Peroxidase)	AT2G41480	Peroxidase superfamily protein
Medtr7g033720	2.01121	0.126414	15.9097	5.42505e-57	1.8522e-55	PF00646(F-box domain)	AT5G40470	RNI-like superfamily protein
Medtr7g053110	2.00902	0.338647	5.9325	2.98349e-09	1.34248e-08		AT4G11420	eukaryotic translation initiation factor 3A
Medtr8g077085	2.00694	0.594062	3.37834	0.00072925	0.00188844		AT5G66440
Medtr6g051680	2.00476	0.324414	6.17963	6.42513e-10	3.0407e-09	PF00403(Heavy-metal-associated domain)	AT1G01490	Heavy metal transport/detoxification superfamily protein
Medtr3g034180	2.00459	0.22109	9.06683	1.22526e-19	1.06922e-18	PF00646(F-box domain)	AT3G06240	F-box family protein
Medtr4g074995	2.00408	0.78443	2.55483	0.010624	0.0224727	PF00141(Peroxidase)	AT1G14550	Peroxidase superfamily protein
Medtr4g083970	2.00307	0.158708	12.6211	1.61569e-36	2.88439e-35		AT4G19840	phloem protein 2-A1
Medtr4g025900	2.00056	0.494609	4.04473	5.23844e-05	0.00015791	PF04690(YABBY protein)	AT2G45190	Plant-specific transcription factor YABBY family protein
Medtr4g078110	1.99885	0.224799	8.89173	6.01641e-19	5.04374e-18	PF00067(Cytochrome P450)	AT2G45560	cytochrome P450, family 76, subfamily C, polypeptide 1
Medtr0283s0050	1.99839	0.2188	9.1334	6.63792e-20	5.87383e-19	PF00069(Protein kinase domain)	AT5G55560	Protein kinase superfamily protein
Medtr1g087510	1.99811	0.296543	6.73801	1.6057e-11	8.59089e-11		AT4G01560	Ribosomal RNA processing Brix domain protein
Medtr4g129270	1.99715	0.345207	5.78537	7.23547e-09	3.16072e-08	PF02358(Trehalose-phosphatase), PF00982(Glycosyltransferase family 20)	AT2G18700	trehalose phosphatase/synthase 11
Medtr3g075390	1.99655	0.377243	5.29247	1.20678e-07	4.74688e-07	PF08246(Cathepsin propeptide inhibitor domain (I29)), PF00112(Papain family cysteine protease)	AT5G50260	Cysteine proteinases superfamily protein
Medtr1g094620	1.99633	0.150462	13.2681	3.54633e-40	7.21314e-39	PF01490(Transmembrane amino acid transporter protein)	AT2G39130	Transmembrane amino acid transporter family protein
MT4Noble_055750	1.99607	0.181933	10.9715	5.23958e-28	6.79838e-27
Medtr1g032240	1.99519	0.633841	3.14779	0.00164513	0.0040362	PF03171(2OG-Fe(II) oxygenase superfamily)	AT5G59530	2-oxoglutarate (2OG) and Fe(II)-dependent oxygenase superfamily protein
Medtr1g069110	1.99425	0.563904	3.53651	0.000405446	0.00108924	PF00023(Ankyrin repeat)	AT5G51160	Ankyrin repeat family protein
Medtr5g097530	1.99423	0.239571	8.32419	8.49071e-17	6.32217e-16	PF00069(Protein kinase domain)	AT5G55560	Protein kinase superfamily protein
Medtr8g021190	1.99387	0.146518	13.6084	3.57088e-42	7.84455e-41	PF07911(Protein of unknown function (DUF1677))	AT1G72510	Protein of unknown function (DUF1677)
Medtr8g076910	1.9933	0.690043	2.88865	0.00386896	0.00889915	PF01582(TIR domain), PF00931(NB-ARC domain)	AT5G17680	disease resistance protein (TIR-NBS-LRR class), putative
Medtr7g112870	1.99264	0.254433	7.83167	4.81421e-15	3.22708e-14	PF00149(Calcineurin-like phosphoesterase)	AT5G27840	Calcineurin-like metallo-phosphoesterase superfamily protein
Medtr5g010680	1.99251	0.20561	9.69074	3.30136e-22	3.28639e-21	PF00447(HSF-type DNA-binding)	AT4G11660	winged-helix DNA-binding transcription factor family protein
Medtr4g072020	1.99221	0.188346	10.5774	3.79215e-26	4.54797e-25	PF02784(Pyridoxal-dependent decarboxylase, pyridoxal binding domain), PF00278(Pyridoxal-dependent decarboxylase, C-terminal sheet domain)	AT2G16500	arginine decarboxylase 1
Medtr1g087300	1.99163	0.191438	10.4035	2.38919e-25	2.74646e-24	PF01734(Patatin-like phospholipase), PF11815(Domain of unknown function (DUF3336))	AT5G04040	Patatin-like phospholipase family protein
Medtr1g105770	1.99146	0.543451	3.66447	0.000247855	0.000685314
Medtr3g037380	1.99086	0.145323	13.6996	1.02055e-42	2.28947e-41	PF12352(Snare region anchored in the vesicle membrane C-terminus), PF05008(Vesicle transport v-SNARE protein N-terminus)	AT1G26670	Vesicle transport v-SNARE family protein
Medtr2g022460	1.99004	0.297379	6.69194	2.20224e-11	1.16272e-10	PF00026(Eukaryotic aspartyl protease)	AT1G03220	Eukaryotic aspartyl protease family protein
Medtr3g113800	1.98941	0.329627	6.03532	1.58644e-09	7.29468e-09	PF02319(E2F/DP family winged-helix DNA-binding domain)	AT1G47870	winged-helix DNA-binding transcription factor family protein
Medtr4g094562	1.98874	0.197622	10.0633	8.02256e-24	8.61096e-23	PF07712(Stress up-regulated Nod 19)	AT5G61820
Medtr0053s0030	1.98873	0.117588	16.9127	3.6245e-64	1.50648e-62	PF03109(ABC1 family)	AT1G79600	Protein kinase superfamily protein
Medtr4g122990	1.98663	0.837345	2.37253	0.0176666	0.0355576
Medtr4g082550	1.98584	0.188691	10.5243	6.67586e-26	7.90092e-25		AT3G11810
Medtr8g058603	1.9841	0.434623	4.56512	4.99206e-06	1.68151e-05	PF03105(SPX domain)	AT1G02860	SPX (SYG1/Pho81/XPR1) domain-containing protein
Medtr2g450310	1.98256	0.734938	2.69759	0.00698432	0.0153303	PF00743(Flavin-binding monooxygenase-like)	AT1G19250	flavin-dependent monooxygenase 1
Medtr4g035900	1.98189	0.35974	5.50924	3.60378e-08	1.49117e-07
Medtr8g096850	1.98038	0.316385	6.2594	3.86458e-10	1.85709e-09	PF00571(CBS domain), PF00564(PB1 domain)	AT5G50530	CBS / octicosapeptide/Phox/Bemp1 (PB1) domains-containing protein
Medtr1g010150	1.97922	0.152385	12.9883	1.4254e-38	2.73586e-37	PF00097(Zinc finger, C3HC4 type (RING finger))	AT5G25560	CHY-type/CTCHY-type/RING-type Zinc finger protein
Medtr4g120825	1.97874	0.221486	8.93394	4.11086e-19	3.47675e-18	PF04043(Plant invertase/pectin methylesterase inhibitor)	AT2G01610	Plant invertase/pectin methylesterase inhibitor superfamily protein
Medtr6g071985	1.97782	0.187902	10.5258	6.57162e-26	7.78066e-25		AT1G43710	Pyridoxal phosphate (PLP)-dependent transferases superfamily protein
Medtr4g086260	1.97757	0.163102	12.1247	7.81178e-34	1.27269e-32	PF00036(EF hand)	AT2G15680	Calcium-binding EF-hand family protein
Medtr1g087310	1.97677	0.199055	9.9308	3.05791e-23	3.18977e-22		AT5G10270	cyclin-dependent kinase C;1
Medtr8g059605	1.97487	0.173183	11.4034	4.02323e-30	5.69109e-29	PF11721(Di-glucose binding within endoplasmic reticulum), PF00069(Protein kinase domain), PF00560(Leucine Rich Repeat)	AT3G14840	Leucine-rich repeat transmembrane protein kinase
Medtr5g096593	1.97426	0.324739	6.07953	1.20538e-09	5.5946e-09
Medtr2g100260	1.97279	0.471699	4.18231	2.88568e-05	8.96971e-05	PF03208(PRA1 family protein)	AT1G55190	PRA1 (Prenylated rab acceptor) family protein
Medtr8g071920	1.97263	0.496238	3.97516	7.03318e-05	0.000208679	PF06813(Nodulin-like)	AT4G19450	Major facilitator superfamily protein
Medtr0400s0030	1.97231	0.248095	7.94983	1.86767e-15	1.28419e-14	PF00069(Protein kinase domain), PF00560(Leucine Rich Repeat), PF08263(Leucine rich repeat N-terminal domain)	AT4G08850	Leucine-rich repeat receptor-like protein kinase family protein
Medtr7g090370	1.97217	0.219685	8.97729	2.77508e-19	2.37412e-18	PF00702(haloacid dehalogenase-like hydrolase)	AT2G41250	Haloacid dehalogenase-like hydrolase (HAD) superfamily protein
Medtr5g036660	1.9718	0.274483	7.18368	6.78579e-13	3.97818e-12	PF08148(DSHCT (NUC185) domain), PF00270(DEAD/DEAH box helicase), PF00271(Helicase conserved C-terminal domain)	AT1G70070	DEAD/DEAH box helicase, putative
Medtr7g112400	1.9702	0.138931	14.1811	1.19978e-45	3.003e-44	PF05605(Drought induced 19 protein (Di19), zinc-binding)	AT3G05700	Drought-responsive family protein
Medtr8g099270	1.97007	0.673108	2.92682	0.00342446	0.00796201
Medtr3g011910	1.96936	0.446638	4.40931	1.03701e-05	3.37676e-05	PF00069(Protein kinase domain), PF01657(Salt stress response/antifungal)	AT4G05200	cysteine-rich RLK (RECEPTOR-like protein kinase) 25
Medtr2g066830	1.96904	0.227793	8.64399	5.42833e-18	4.33959e-17	PF02519(Auxin responsive protein)	AT3G12830	SAUR-like auxin-responsive protein family
Medtr8g046245	1.96839	0.478506	4.11361	3.89511e-05	0.000119248	PF00011(Hsp20/alpha crystallin family)	AT5G04890	HSP20-like chaperones superfamily protein
Medtr7g072875	1.96833	0.321861	6.11544	9.62889e-10	4.50131e-09	PF04844(Transcriptional repressor, ovate)	AT1G06920	ovate family protein 4
Medtr3g067935	1.96795	0.229356	8.58034	9.45911e-18	7.46129e-17		AT5G13820	telomeric DNA binding protein 1
Medtr7g076840	1.96668	0.67336	2.92069	0.00349255	0.00810635	PF00010(Helix-loop-helix DNA-binding domain)	AT5G65640	beta HLH protein 93
Medtr1g098140	1.96502	0.277078	7.09192	1.32266e-12	7.62437e-12	PF02797(Chalcone and stilbene synthases, C-terminal domain), PF00195(Chalcone and stilbene synthases, N-terminal domain)	AT5G13930	Chalcone and stilbene synthase family protein
Medtr2g034700	1.96454	0.133224	14.7462	3.25645e-49	9.07001e-48		AT3G16210	F-box family protein
Medtr4g022800	1.96391	0.291421	6.73909	1.59385e-11	8.53047e-11	PF02458(Transferase family)	AT5G67150	HXXXD-type acyl-transferase family protein
Medtr0365s0020	1.96384	0.245612	7.99569	1.28847e-15	8.95282e-15	PF00069(Protein kinase domain), PF00560(Leucine Rich Repeat), PF08263(Leucine rich repeat N-terminal domain)	AT4G08850	Leucine-rich repeat receptor-like protein kinase family protein
Medtr1g043775	1.962	0.325542	6.02688	1.6716e-09	7.66721e-09	PF03171(2OG-Fe(II) oxygenase superfamily)	AT5G59540	2-oxoglutarate (2OG) and Fe(II)-dependent oxygenase superfamily protein
Medtr2g036063	1.96158	0.802727	2.44365	0.0145395	0.0298227
Medtr4g129020	1.96043	0.203552	9.63111	5.90851e-22	5.80181e-21		AT5G57685	glutamine dumper 3
Medtr8g102340	1.95989	0.245529	7.98234	1.43583e-15	9.94876e-15	PF00332(Glycosyl hydrolases family 17), PF07983(X8 domain)	AT5G56590	O-Glycosyl hydrolases family 17 protein
Medtr3g085460	1.95901	0.412919	4.74429	2.09234e-06	7.32504e-06	PF04727(ELMO/CED-12 family)	AT1G67400	ELMO/CED-12 family protein
Medtr7g113980	1.95752	0.662529	2.95461	0.00313061	0.00732826	PF07714(Protein tyrosine kinase)	AT3G05140	ROP binding protein kinases 2
Medtr4g012060	1.95681	0.344275	5.68387	1.31683e-08	5.64096e-08	PF04844(Transcriptional repressor, ovate)	AT1G79960	ovate family protein 14
Medtr5g096603	1.95624	0.571011	3.42592	0.000612716	0.00160363
Medtr7g112963	1.95516	0.502736	3.88903	0.000100647	0.000293108	PF00561(alpha/beta hydrolase fold)	AT3G05600	alpha/beta-Hydrolases superfamily protein
Medtr3g041700	1.95343	0.188814	10.3457	4.37481e-25	4.96543e-24	PF00682(HMGL-like)	AT2G26800	Aldolase superfamily protein
Medtr3g030240	1.95259	0.438499	4.45291	8.47142e-06	2.78512e-05	PF00646(F-box domain)	AT3G06240	F-box family protein
Medtr8g075780	1.9517	0.33064	5.90281	3.57371e-09	1.59932e-08	PF00226(DnaJ domain)	AT4G36040	Chaperone DnaJ-domain superfamily protein
Medtr1g109630	1.94989	0.856404	2.27684	0.022796	0.0448639	PF02453(Reticulon)	AT3G18260	Reticulon family protein
Medtr7g018840	1.94915	0.617829	3.15483	0.0016059	0.00394584	PF00931(NB-ARC domain)	AT1G61180	LRR and NB-ARC domains-containing disease resistance protein
Medtr4g114640	1.94854	0.201214	9.6839	3.52997e-22	3.51042e-21		AT2G25490	EIN3-binding F box protein 1
Medtr7g068320	1.94833	0.162004	12.0265	2.5796e-33	4.13896e-32	PF00107(Zinc-binding dehydrogenase), PF08240(Alcohol dehydrogenase GroES-like domain)	AT1G32780	GroES-like zinc-binding dehydrogenase family protein
Medtr7g108875	1.9481	0.420124	4.63696	3.53565e-06	1.21104e-05	PF04043(Plant invertase/pectin methylesterase inhibitor), PF01095(Pectinesterase)	AT4G02330	Plant invertase/pectin methylesterase inhibitor superfamily
Medtr2g096690	1.94753	0.16184	12.0337	2.36425e-33	3.79754e-32	PF00179(Ubiquitin-conjugating enzyme)	AT5G59300	ubiquitin carrier protein 7
Medtr3g023020	1.94748	0.433822	4.48913	7.15148e-06	2.37036e-05		AT3G14460	LRR and NB-ARC domains-containing disease resistance protein
Medtr5g088350	1.94728	0.182217	10.6866	1.17596e-26	1.43947e-25	PF00069(Protein kinase domain), PF03822(NAF domain)	AT2G26980	CBL-interacting protein kinase 3
Medtr4g131800	1.94681	0.20218	9.62909	6.02589e-22	5.91511e-21	PF03151(Triose-phosphate Transporter family), PF00232(Glycosyl hydrolase family 1), PF00892(EamA-like transporter family)	AT1G61810	beta-glucosidase 45
Medtr1g083780	1.94652	0.0879857	22.1232	1.89083e-108	2.1635e-106	PF05605(Drought induced 19 protein (Di19), zinc-binding)	AT3G05700	Drought-responsive family protein
Medtr7g105870	1.94431	0.456727	4.25706	2.07134e-05	6.53022e-05	PF03168(Late embryogenesis abundant protein)	AT2G35980	Late embryogenesis abundant (LEA) hydroxyproline-rich glycoprotein family
Medtr3g014750	1.94376	0.228385	8.51088	1.72625e-17	1.3392e-16	PF07969(Amidohydrolase family)	AT3G55850	Amidohydrolase family
Medtr1g019110	1.94293	0.298413	6.51088	7.47133e-11	3.79261e-10	PF00847(AP2 domain)	AT2G23340	DREB and EAR motif protein 3
Medtr4g121600	1.94208	0.117882	16.4747	5.57728e-61	2.12446e-59	PF00501(AMP-binding enzyme)	AT3G16910	acyl-activating enzyme 7
Medtr3g094210	1.94066	0.429683	4.51649	6.28745e-06	2.0957e-05	PF04928(Poly(A) polymerase central domain), PF01909(Nucleotidyltransferase domain)	AT3G56320	PAP/OAS1 substrate-binding domain superfamily
Medtr1g094250	1.94026	0.63177	3.07115	0.00213233	0.00513878
Medtr4g021800	1.93975	0.380188	5.10209	3.35928e-07	1.26818e-06		AT5G02230	Haloacid dehalogenase-like hydrolase (HAD) superfamily protein
Medtr1g027170	1.93937	0.738281	2.62687	0.00861731	0.0185659
Medtr7g106540	1.93909	0.366723	5.28762	1.23918e-07	4.86786e-07		AT3G11760
Medtr7g115120	1.93899	0.230586	8.40895	4.13703e-17	3.13798e-16	PF00170(bZIP transcription factor), PF12498(Basic leucine-zipper C terminal)	AT5G28770	bZIP transcription factor family protein
Medtr7g106820	1.93804	0.263042	7.3678	1.73466e-13	1.05363e-12		AT3G11690
Medtr8g006430	1.93781	0.122695	15.7937	3.44011e-56	1.15326e-54	PF00684(DnaJ central domain), PF00226(DnaJ domain), PF01556(DnaJ C terminal domain)	AT5G22060	DNAJ homologue 2
Medtr8g085210	1.93694	0.0775656	24.9716	1.24322e-137	2.50631e-135	PF02140(Galactose binding lectin domain), PF01301(Glycosyl hydrolases family 35)	AT2G32810	beta galactosidase 9
Medtr2g015870	1.93667	0.474852	4.07847	4.53328e-05	0.000137661		AT2G27430	ARM repeat superfamily protein
Medtr3g088560	1.93538	0.210719	9.18465	4.12853e-20	3.69411e-19	PF00651(BTB/POZ domain)	AT1G21780	BTB/POZ domain-containing protein
Medtr4g019210	1.93527	0.272986	7.08927	1.3482e-12	7.7701e-12	PF10250(GDP-fucose protein O-fucosyltransferase)	AT2G37980	O-fucosyltransferase family protein
Medtr2g091315	1.9336	0.85793	2.25379	0.0242093	0.0473622
Medtr2g069320	1.93136	0.181558	10.6377	1.98889e-26	2.41264e-25	PF03144(Elongation factor Tu domain 2), PF00679(Elongation factor G C-terminus), PF00009(Elongation factor Tu GTP binding domain), PF03764(Elongation factor G, domain IV)	AT1G56070	Ribosomal protein S5/Elongation factor G/III/V family protein
Medtr3g102680	1.93107	0.67832	2.84684	0.00441551	0.0100603		AT5G43120	ARM-repeat/Tetratricopeptide repeat (TPR)-like protein
Medtr8g091660	1.92967	0.116867	16.5116	3.02623e-61	1.16319e-59	PF00202(Aminotransferase class-III)	AT4G39660	alanine:glyoxylate aminotransferase 2
Medtr4g120760	1.92942	0.37815	5.10228	3.35592e-07	1.26708e-06	PF00407(Pathogenesis-related protein Bet v I family)	AT1G24020	MLP-like protein 423
Medtr8g102375	1.929	0.379183	5.08726	3.63275e-07	1.36881e-06
Medtr8g017410	1.92883	0.253261	7.61599	2.61671e-14	1.67378e-13	PF00251(Glycosyl hydrolases family 32 N-terminal domain)	AT3G13790	Glycosyl hydrolases family 32 protein
Medtr7g084040	1.92777	0.109778	17.5606	4.93126e-69	2.34948e-67	PF01074(Glycosyl hydrolases family 38 N-terminal domain), PF07748(Glycosyl hydrolases family 38 C-terminal domain), PF09261(Alpha mannosidase, middle domain)	AT3G26720	Glycosyl hydrolase family 38 protein
Medtr7g092400	1.92742	0.204308	9.43386	3.95256e-21	3.72564e-20	PF01754(A20-like zinc finger), PF01428(AN1-like Zinc finger)	AT1G51200	A20/AN1-like zinc finger family protein
Medtr8g023060	1.92741	0.234829	8.20775	2.25368e-16	1.64138e-15	PF04525(LURP-one-related)	AT3G14260	Protein of unknown function (DUF567)
Medtr5g081620	1.92715	0.518609	3.71601	0.000202396	0.000565955	PF00498(FHA domain)	AT3G20550	SMAD/FHA domain-containing protein
Medtr3g466760	1.92601	0.463941	4.15141	3.3043e-05	0.000102131	PF03330(Rare lipoprotein A (RlpA)-like double-psi beta-barrel), PF01357(Pollen allergen)	AT2G40610	expansin A8
Medtr8g105190	1.92532	0.341567	5.63672	1.73318e-08	7.35119e-08		AT1G67920
Medtr4g063500	1.92516	0.537426	3.58219	0.000340719	0.0009244	PF00903(Glyoxalase/Bleomycin resistance protein/Dioxygenase superfamily)	AT1G07645	dessication-induced 1VOC superfamily protein
Medtr1g064170	1.92429	0.426685	4.50985	6.48735e-06	2.1582e-05	PF01535(PPR repeat)	AT1G62720	Pentatricopeptide repeat (PPR-like) superfamily protein
Medtr4g120380	1.92326	0.268078	7.17425	7.27068e-13	4.25235e-12	PF02536(mTERF)	AT5G07900	Mitochondrial transcription termination factor family protein
Medtr8g091590	1.92271	0.38059	5.05192	4.3739e-07	1.63497e-06		AT5G65207
Medtr4g053250	1.92131	0.732734	2.62211	0.00873867	0.0188014	PF00170(bZIP transcription factor)	AT1G08320	bZIP transcription factor family protein
Medtr4g116360	1.91992	0.601259	3.19317	0.00140721	0.00348656
Medtr3g046650	1.91977	0.183225	10.4776	1.09448e-25	1.28253e-24		AT2G05642	Nucleic acid-binding, OB-fold-like protein
Medtr1g033830	1.91856	0.0715598	26.8106	2.43412e-158	7.28639e-156	PF06454(Protein of unknown function (DUF1084))	AT2G02180	tobamovirus multiplication protein 3
Medtr4g126790	1.91813	0.190772	10.0546	8.77077e-24	9.39363e-23	PF05915(Eukaryotic protein of unknown function (DUF872))	AT4G29850	Eukaryotic protein of unknown function (DUF872)
Medtr3g103190	1.91692	0.268786	7.13178	9.90772e-13	5.75153e-12		AT1G59590	ZCF37
Medtr2g022480	1.91413	0.556023	3.44254	0.000576288	0.00151376		AT1G03220	Eukaryotic aspartyl protease family protein
Medtr5g041780	1.9137	0.135215	14.153	1.7898e-45	4.43484e-44	PF08241(Methyltransferase domain)	AT1G69523	S-adenosyl-L-methionine-dependent methyltransferases superfamily protein
Medtr3g105210	1.91329	0.366418	5.22159	1.77396e-07	6.86669e-07		AT5G21940
Medtr2g037830	1.91238	0.341132	5.60598	2.07085e-08	8.73962e-08	PF03552(Cellulose synthase)	AT4G18780	cellulose synthase family protein
Medtr7g083660	1.91182	0.115008	16.6233	4.72543e-62	1.85973e-60	PF06813(Nodulin-like)	AT5G45275	Major facilitator superfamily protein
Medtr2g013720	1.91055	0.169689	11.2592	2.08674e-29	2.88033e-28	PF00069(Protein kinase domain), PF00139(Legume lectin domain)	AT4G04960	Concanavalin A-like lectin protein kinase family protein
MT4Noble_053502	1.90902	0.695679	2.74411	0.00606745	0.013486
Medtr7g018310	1.9086	0.114959	16.6024	6.6972e-62	2.61836e-60	PF01536(Adenosylmethionine decarboxylase), PF08132(S-adenosyl-l-methionine decarboxylase leader peptide)	AT3G02470	S-adenosylmethionine decarboxylase
Medtr3g087070	1.90744	0.22378	8.52371	1.54518e-17	1.20219e-16
Medtr3g091510	1.90728	0.126199	15.1133	1.32433e-51	3.91683e-50	PF03145(Seven in absentia protein family)	AT4G27880	Protein with RING/U-box and TRAF-like domains
Medtr7g111380	1.90641	0.13485	14.1372	2.23974e-45	5.52663e-44	PF01679(Proteolipid membrane potential modulator)	AT3G05890	Low temperature and salt responsive protein family
Medtr1g054365	1.90562	0.175662	10.8482	2.03371e-27	2.5723e-26
Medtr1g014930	1.90486	0.188289	10.1167	4.65895e-24	5.06301e-23	PF07911(Protein of unknown function (DUF1677))	AT1G72510	Protein of unknown function (DUF1677)
Medtr5g010620	1.90453	0.118567	16.0629	4.6413e-58	1.63939e-56		AT4G20330	Transcription initiation factor TFIIE, beta subunit
Medtr7g066620	1.90399	0.266824	7.13574	9.62697e-13	5.58964e-12	PF00560(Leucine Rich Repeat)	AT5G49290	receptor like protein 56
Medtr1g053965	1.90378	0.737762	2.58048	0.00986638	0.0210008
Medtr4g094090	1.9027	0.44016	4.32275	1.54098e-05	4.9359e-05	PF01061(ABC-2 type transporter), PF00005(ABC transporter)	AT1G17840	white-brown complex homolog protein 11
MT4Noble_020046	1.90157	0.765908	2.48277	0.0130365	0.0270544
Medtr8g072610	1.90095	0.28958	6.56453	5.21969e-11	2.67854e-10
Medtr8g105230	1.90047	0.752186	2.52659	0.0115174	0.0241864	PF00036(EF hand)	AT1G24620	EF hand calcium-binding protein family
Medtr7g096830	1.89799	0.328306	5.78117	7.41832e-09	3.23857e-08	PF00847(AP2 domain)	AT2G31230	ethylene-responsive element binding factor 15
Medtr3g117560	1.89781	0.816157	2.3253	0.0200561	0.0399195
Medtr2g009890	1.89629	0.342123	5.54272	2.97807e-08	1.23919e-07	PF01486(K-box region), PF00319(SRF-type transcription factor (DNA-binding and dimerisation domain))	AT4G37940	AGAMOUS-like 21
Medtr8g070000	1.89601	0.120236	15.7691	5.07339e-56	1.69122e-54	PF07859(alpha/beta hydrolase fold)	AT1G26120	alpha/beta-Hydrolases superfamily protein
Medtr3g072800	1.89474	0.48059	3.94254	8.06238e-05	0.000237598	PF00069(Protein kinase domain), PF01453(D-mannose binding lectin)	AT5G35370	S-locus lectin protein kinase family protein
Medtr4g064005	1.89456	0.273868	6.91779	4.58743e-12	2.55398e-11	PF00125(Core histone H2A/H2B/H3/H4)	AT5G02560	histone H2A 12
Medtr1g016290	1.89421	0.360194	5.25887	1.44946e-07	5.66611e-07		AT3G25690	Hydroxyproline-rich glycoprotein family protein
Medtr0035s0150	1.89348	0.220153	8.60075	7.91972e-18	6.27039e-17	PF03321(GH3 auxin-responsive promoter)	AT2G14960	Auxin-responsive GH3 family protein
Medtr5g017980	1.8913	0.243694	7.76095	8.42957e-15	5.57239e-14	PF00249(Myb-like DNA-binding domain)	AT4G37180	Homeodomain-like superfamily protein
Medtr2g037790	1.89078	0.224609	8.4181	3.82655e-17	2.90993e-16	PF01237(Oxysterol-binding protein )	AT5G57240	OSBP(oxysterol binding protein)-related protein 4C
Medtr7g065150	1.89067	0.13727	13.7734	3.68518e-43	8.44627e-42		AT5G02020
Medtr1g112660	1.88833	0.143202	13.1865	1.04971e-39	2.10761e-38	PF05278(Arabidopsis phospholipase-like protein (PEARLI 4))	AT4G35110	Arabidopsis phospholipase-like protein (PEARLI 4) family
MT4Noble_033064	1.88827	0.472998	3.99213	6.54813e-05	0.00019499
Medtr4g105450	1.88695	0.221666	8.51257	1.70123e-17	1.32048e-16	PF00650(CRAL/TRIO domain)	AT5G63060	Sec14p-like phosphatidylinositol transfer family protein
Medtr7g015750	1.88688	0.294149	6.41469	1.41106e-10	7.01272e-10	PF00069(Protein kinase domain)	AT3G51550	Malectin/receptor-like protein kinase family protein
Medtr4g090350	1.88645	0.202394	9.32069	1.15585e-20	1.06577e-19
Medtr2g012270	1.88578	0.845268	2.23098	0.0256825	0.0499017	PF00804(Syntaxin), PF05739(SNARE domain)	AT1G61290	syntaxin of plants 124
Medtr7g022490	1.88551	0.459519	4.10321	4.07449e-05	0.000124495	PF02179(BAG domain)	AT1G12060	BCL-2-associated athanogene 5
Medtr8g068520	1.88444	0.542832	3.4715	0.000517563	0.00137081	PF05055(Protein of unknown function (DUF677))	AT1G20180	Protein of unknown function (DUF677)
Medtr1g054055	1.88379	0.496308	3.7956	0.000147286	0.000419211	PF05678(VQ motif)	AT3G58000	VQ motif-containing protein
Medtr1g105600	1.88006	0.262885	7.15163	8.57524e-13	4.99071e-12	PF01657(Salt stress response/antifungal), PF00069(Protein kinase domain)	AT4G23180	cysteine-rich RLK (RECEPTOR-like protein kinase) 10
Medtr7g075610	1.88	0.16471	11.414	3.55997e-30	5.04541e-29	PF00067(Cytochrome P450)	AT2G45550	cytochrome P450, family 76, subfamily C, polypeptide 4
Medtr4g079290	1.87999	0.0795806	23.6237	2.19795e-123	3.4647e-121	PF02770(Acyl-CoA dehydrogenase, middle domain), PF01756(Acyl-CoA oxidase), PF00441(Acyl-CoA dehydrogenase, C-terminal domain)	AT1G06290	acyl-CoA oxidase 3
Medtr4g098500	1.87963	0.369746	5.08356	3.70416e-07	1.39482e-06	PF06943(LSD1 zinc finger)	AT1G32540	lsd one like 1
MT4Noble_044137	1.87949	0.798334	2.35427	0.0185593	0.03718
Medtr2g026160	1.87938	0.280673	6.69596	2.14265e-11	1.13247e-10	PF00083(Sugar (and other) transporter)	AT4G16480	inositol transporter 4
Medtr4g109220	1.87881	0.217631	8.63303	5.97453e-18	4.76595e-17	PF07839(Plant calmodulin-binding domain)	AT5G39380	Plant calmodulin-binding protein-related
Medtr6g037560	1.87782	0.532847	3.52411	0.000424901	0.00113892	PF01812(5-formyltetrahydrofolate cyclo-ligase family)	AT1G76730	NagB/RpiA/CoA transferase-like superfamily protein
Medtr4g011900	1.87757	0.168038	11.1735	5.49936e-29	7.44851e-28	PF01344(Kelch motif)	AT1G15670	Galactose oxidase/kelch repeat superfamily protein
Medtr7g016840	1.87667	0.126473	14.8385	8.25402e-50	2.34075e-48	PF00097(Zinc finger, C3HC4 type (RING finger))	AT5G15790	RING/U-box superfamily protein
Medtr5g092210	1.87573	0.285198	6.57695	4.80211e-11	2.47067e-10	PF01582(TIR domain), PF00931(NB-ARC domain)	AT5G17680	disease resistance protein (TIR-NBS-LRR class), putative
Medtr2g066800	1.87504	0.463085	4.04901	5.14344e-05	0.000155172
Medtr8g015560	1.87484	0.243282	7.70645	1.29365e-14	8.42763e-14
Medtr1g083290	1.8747	0.172648	10.8585	1.81668e-27	2.30172e-26	PF08414(Respiratory burst NADPH oxidase), PF08030(Ferric reductase NAD binding domain), PF08022(FAD-binding domain), PF01794(Ferric reductase like transmembrane component)	AT1G09090	respiratory burst oxidase homolog B
Medtr2g014550	1.87376	0.421336	4.44718	8.70042e-06	2.85755e-05	PF05078(Protein of unknown function (DUF679))	AT5G46090	Protein of unknown function (DUF679)
Medtr5g015680	1.87282	0.185368	10.1032	5.34485e-24	5.78928e-23	PF02135(TAZ zinc finger)	AT5G67480	BTB and TAZ domain protein 4
Medtr4g021755	1.87206	0.278899	6.71231	1.91567e-11	1.0163e-10	PF01694(Rhomboid family)	AT2G29050	RHOMBOID-like 1
Medtr8g077950	1.86999	0.163159	11.4612	2.06691e-30	2.94627e-29	PF07777(G-box binding protein MFMR), PF00170(bZIP transcription factor)	AT4G36730	G-box binding factor 1
Medtr2g014900	1.86994	0.597154	3.13142	0.00173965	0.00425086	PF00201(UDP-glucoronosyl and UDP-glucosyl transferase)	AT5G54010	UDP-Glycosyltransferase superfamily protein
Medtr4g019640	1.86959	0.311272	6.00627	1.89837e-09	8.66711e-09
Medtr8g107230	1.86894	0.488386	3.82677	0.000129836	0.000372344	PF01535(PPR repeat)	AT2G01390	Tetratricopeptide repeat (TPR)-like superfamily protein
Medtr4g022550	1.86894	0.371749	5.02742	4.97117e-07	1.85053e-06	PF00957(Synaptobrevin)	AT1G04750	vesicle-associated membrane protein 721
Medtr8g097390	1.86678	0.402342	4.63978	3.48774e-06	1.19534e-05	PF04525(LURP-one-related)	AT1G63410	Protein of unknown function (DUF567)
Medtr4g115330	1.86592	0.216829	8.60549	7.5989e-18	6.02283e-17	PF05691(Raffinose synthase or seed imbibition protein Sip1)	AT5G20250	Raffinose synthase family protein
Medtr8g038740	1.86427	0.309506	6.02336	1.70835e-09	7.8273e-09
Medtr3g092470	1.86248	0.548613	3.39488	0.000686583	0.00178403		AT5G03890
Medtr2g096830	1.86163	0.443268	4.1998	2.67156e-05	8.33212e-05	PF01490(Transmembrane amino acid transporter protein)	AT5G40780	lysine histidine transporter 1
Medtr2g451540	1.86063	0.177775	10.4663	1.23436e-25	1.4396e-24	PF00564(PB1 domain)	AT2G25290	Octicosapeptide/Phox/Bem1p (PB1) domain-containing protein / tetratricopeptide repeat (TPR)-containing protein
Medtr1g070345	1.85913	0.290408	6.40177	1.53582e-10	7.60594e-10	PF00067(Cytochrome P450)	AT5G63450	cytochrome P450, family 94, subfamily B, polypeptide 1
Medtr7g093820	1.85583	0.278086	6.67358	2.49631e-11	1.31237e-10	PF03018(Dirigent-like protein)	AT5G42500	Disease resistance-responsive (dirigent-like protein) family protein
Medtr3g085400	1.85543	0.147578	12.5725	2.98929e-36	5.27922e-35	PF03031(NLI interacting factor-like phosphatase)	AT5G11860	SCP1-like small phosphatase 5
Medtr1g111470	1.85511	0.497831	3.72638	0.000194246	0.000544348
Medtr7g112530	1.85438	0.312457	5.93483	2.94153e-09	1.32461e-08	PF08661(Replication factor A protein 3)	AT1G56260
Medtr7g063280	1.8542	0.449476	4.12525	3.7033e-05	0.000113622
Medtr3g094160	1.85263	0.0681754	27.1745	1.30207e-162	4.2403e-160	PF02065(Melibiase)	AT3G56310	Melibiase family protein
Medtr1g007325	1.85251	0.35735	5.18402	2.17148e-07	8.33249e-07	PF00579(tRNA synthetases class I (W and Y))	AT2G33840	Tyrosyl-tRNA synthetase, class Ib, bacterial/mitochondrial
Medtr1g078050	1.85248	0.46691	3.96752	7.26236e-05	0.000215199		AT1G10390	Nucleoporin autopeptidase
Medtr4g116170	1.8512	0.137791	13.4349	3.7779e-41	7.99701e-40		AT1G15740	Leucine-rich repeat family protein
Medtr7g019160	1.85053	0.178931	10.3422	4.54198e-25	5.14926e-24		AT3G19660
Medtr7g107690	1.8499	0.484337	3.81945	0.00013375	0.00038289	PF00743(Flavin-binding monooxygenase-like)	AT1G48910	Flavin-containing monooxygenase family protein
Medtr5g024300	1.84869	0.166828	11.0814	1.5438e-28	2.05251e-27	PF01490(Transmembrane amino acid transporter protein)	AT4G38250	Transmembrane amino acid transporter family protein
Medtr8g058620	1.84853	0.248789	7.43013	1.08488e-13	6.66881e-13	PF00582(Universal stress protein family)	AT2G47710	Adenine nucleotide alpha hydrolases-like superfamily protein
Medtr3g114460	1.84811	0.395062	4.67802	2.89653e-06	1.00045e-05	PF05055(Protein of unknown function (DUF677))	AT1G20180	Protein of unknown function (DUF677)
Medtr1g078030	1.8478	0.0724155	25.5167	1.28762e-143	2.8908e-141	PF01852(START domain)	AT1G64720	Polyketide cyclase/dehydrase and lipid transport superfamily protein
Medtr1g114510	1.84762	0.429185	4.30496	1.67019e-05	5.32444e-05
Medtr8g067465	1.84757	0.613613	3.01097	0.00260411	0.00617384
Medtr1g077930	1.84691	0.552858	3.34066	0.0008358	0.00214264	PF00561(alpha/beta hydrolase fold)	AT4G24140	alpha/beta-Hydrolases superfamily protein
Medtr7g108840	1.84618	0.476269	3.87633	0.000106043	0.000308278	PF03105(SPX domain)	AT1G02860	SPX (SYG1/Pho81/XPR1) domain-containing protein
Medtr1g017270	1.84469	0.214816	8.58732	8.90217e-18	7.02759e-17	PF01946(Thi4 family), PF08491(Squalene epoxidase)	AT1G58440	FAD/NAD(P)-binding oxidoreductase family protein
Medtr5g091950	1.84446	0.185721	9.93137	3.04058e-23	3.1728e-22	PF00560(Leucine Rich Repeat), PF07714(Protein tyrosine kinase), PF11721(Di-glucose binding within endoplasmic reticulum)	AT1G07650	Leucine-rich repeat transmembrane protein kinase
Medtr6g012450	1.84388	0.273043	6.7531	1.4472e-11	7.77518e-11	PF02701(Dof domain, zinc finger)	AT5G39660	cycling DOF factor 2
Medtr5g011580	1.84368	0.272321	6.77025	1.2856e-11	6.93356e-11	PF01842(ACT domain)	AT1G12420	ACT domain repeat 8
Medtr3g077950	1.84325	0.177807	10.3666	3.51995e-25	4.01515e-24	PF00515(Tetratricopeptide repeat)	AT3G27960	Tetratricopeptide repeat (TPR)-like superfamily protein
Medtr3g117590	1.842	0.160955	11.4442	2.51435e-30	3.57204e-29	PF00156(Phosphoribosyl transferase domain), PF00310(Glutamine amidotransferases class-II)	AT2G16570	GLN phosphoribosyl pyrophosphate amidotransferase 1
Medtr7g077860	1.83913	0.0872674	21.0747	1.35845e-98	1.29031e-96		AT2G45980
Medtr4g009873	1.83894	0.153592	11.9729	4.92758e-33	7.79652e-32		AT1G15740	Leucine-rich repeat family protein
Medtr4g120830	1.83842	0.233649	7.86831	3.59454e-15	2.42929e-14	PF04043(Plant invertase/pectin methylesterase inhibitor)	AT2G01610	Plant invertase/pectin methylesterase inhibitor superfamily protein
Medtr1g107155	1.83814	0.595029	3.08917	0.00200718	0.00485772		AT1G30600	Subtilase family protein
Medtr7g109130	1.83803	0.414787	4.43126	9.36859e-06	3.06478e-05	PF00225(Kinesin motor domain)	AT2G47500	P-loop nucleoside triphosphate hydrolases superfamily protein with CH (Calponin Homology) domain
Medtr4g083000	1.83764	0.18568	9.89678	4.29886e-23	4.45911e-22	PF00232(Glycosyl hydrolase family 1)	AT1G26560	beta glucosidase 40
Medtr2g100630	1.83739	0.342874	5.35878	8.3784e-08	3.34989e-07		AT1G52080	actin binding protein family
Medtr1g075540	1.83602	0.366601	5.00823	5.49339e-07	2.03547e-06	PF04117(Mpv17 / PMP22 family )	AT4G14305	Peroxisomal membrane 22 kDa (Mpv17/PMP22) family protein
Medtr7g018290	1.83594	0.0973301	18.863	2.29717e-79	1.43557e-77	PF01536(Adenosylmethionine decarboxylase)	AT3G02470	S-adenosylmethionine decarboxylase
Medtr1g095510	1.83568	0.0922822	19.892	4.76911e-88	3.68054e-86	PF00179(Ubiquitin-conjugating enzyme)	AT3G20060	ubiquitin-conjugating enzyme19
Medtr1g090060	1.83541	0.195413	9.39246	5.86127e-21	5.46739e-20	PF02798(Glutathione S-transferase, N-terminal domain), PF00043(Glutathione S-transferase, C-terminal domain)	AT3G09270	glutathione S-transferase TAU 8
Medtr8g086520	1.83535	0.38089	4.81857	1.44593e-06	5.14716e-06	PF00860(Permease family)	AT2G34190	Xanthine/uracil permease family protein
Medtr8g058050	1.8353	0.736679	2.49131	0.0127272	0.0264975
Medtr2g089905	1.83475	0.43608	4.20737	2.58357e-05	8.07639e-05	PF12609(Wound-induced protein)	AT4G10270	Wound-responsive family protein
Medtr4g102740	1.83443	0.474126	3.86908	0.000109249	0.000317099	PF02179(BAG domain)	AT5G52060	BCL-2-associated athanogene 1
Medtr8g095210	1.83304	0.153617	11.9326	8.00751e-33	1.25094e-31	PF10537(ATP-utilising chromatin assembly and remodelling N-terminal), PF02791(DDT domain)	AT5G08630	DDT domain-containing protein
Medtr2g450040	1.83302	0.18539	9.88738	4.72211e-23	4.89129e-22	PF00067(Cytochrome P450)	AT4G31970	cytochrome P450, family 82, subfamily C, polypeptide 2
Medtr4g010120	1.83207	0.131589	13.9227	4.61181e-44	1.09249e-42		AT3G15820	phosphatidic acid phosphatase-related / PAP2-related
Medtr7g063260	1.8316	0.254472	7.19765	6.12587e-13	3.59841e-12	PF00106(short chain dehydrogenase)	AT5G06060	NAD(P)-binding Rossmann-fold superfamily protein
Medtr7g118230	1.83117	0.240924	7.6006	2.94758e-14	1.88055e-13	PF00076(RNA recognition motif. (a.k.a. RRM, RBD, or RNP domain))	AT1G01080	RNA-binding (RRM/RBD/RNP motifs) family protein
Medtr2g063560	1.82866	0.683578	2.67513	0.00746999	0.0162942	PF00011(Hsp20/alpha crystallin family)	AT1G59860	HSP20-like chaperones superfamily protein
Medtr3g464650	1.82289	0.535701	3.40281	0.000666974	0.00173628	PF00481(Protein phosphatase 2C)	AT2G30020	Protein phosphatase 2C family protein
Medtr8g033090	1.82276	0.615864	2.95969	0.00307952	0.00722006		AT4G12560	F-box and associated interaction domains-containing protein
Medtr5g021290	1.8222	0.190309	9.57497	1.01884e-21	9.89293e-21	PF00560(Leucine Rich Repeat)	AT5G66330	Leucine-rich repeat (LRR) family protein
Medtr5g070350	1.82199	0.201588	9.0382	1.59273e-19	1.38378e-18	PF00294(pfkB family carbohydrate kinase)	AT5G58730	pfkB-like carbohydrate kinase family protein
Medtr2g020040	1.82127	0.0705401	25.8189	5.44218e-147	1.35528e-144	PF05495(CHY zinc finger), PF00097(Zinc finger, C3HC4 type (RING finger))	AT5G18650	CHY-type/CTCHY-type/RING-type Zinc finger protein
Medtr5g033940	1.82124	0.10422	17.4749	2.22472e-68	1.0465e-66		AT1G10660
Medtr1g019285	1.82093	0.552753	3.29428	0.000986726	0.00250142
MT4Noble_019543	1.82089	0.666435	2.73229	0.00628965	0.0139297
Medtr2g100450	1.81834	0.593536	3.06357	0.00218715	0.00526233	PF00069(Protein kinase domain), PF00560(Leucine Rich Repeat)	AT4G29990	Leucine-rich repeat transmembrane protein kinase protein
Medtr4g072280	1.81684	0.636671	2.85365	0.00432195	0.00986756	PF02519(Auxin responsive protein)	AT4G38840	SAUR-like auxin-responsive protein family
Medtr4g095600	1.81683	0.235224	7.72384	1.1288e-14	7.39601e-14	PF03195(Protein of unknown function DUF260)	AT3G49940	LOB domain-containing protein 38
Medtr2g096330	1.81598	0.133065	13.6473	2.09466e-42	4.64287e-41	PF00926(3,4-dihydroxy-2-butanone 4-phosphate synthase), PF00925(GTP cyclohydrolase II)	AT5G59750	DHBP synthase RibB-like alpha/beta domain;GTP cyclohydrolase II
Medtr3g025830	1.81551	0.232693	7.80217	6.0853e-15	4.05618e-14
Medtr3g047950	1.81497	0.673368	2.69537	0.00703114	0.0154152	PF08646(Replication factor-A C terminal domain), PF04057(Replication factor-A protein 1, N-terminal domain)	AT2G06510	replication protein A 1A
Medtr5g037890	1.81473	0.262532	6.91242	4.76442e-12	2.65152e-11	PF00085(Thioredoxin)	AT5G39950	thioredoxin 2
Medtr6g071990	1.81373	0.198942	9.11689	7.73141e-20	6.80286e-19	PF00282(Pyridoxal-dependent decarboxylase conserved domain)	AT1G43710	Pyridoxal phosphate (PLP)-dependent transferases superfamily protein
Medtr1g046690	1.81338	0.747117	2.42717	0.0152173	0.0310676
Medtr8g028920	1.81294	0.169877	10.6721	1.37515e-26	1.6794e-25	PF00179(Ubiquitin-conjugating enzyme)	AT1G63800	ubiquitin-conjugating enzyme 5
Medtr4g105520	1.81272	0.435829	4.15925	3.193e-05	9.87938e-05	PF08263(Leucine rich repeat N-terminal domain), PF00560(Leucine Rich Repeat)	AT4G20140	Leucine-rich repeat transmembrane protein kinase
Medtr5g022130	1.81185	0.242009	7.48671	7.06192e-14	4.39202e-13	PF00226(DnaJ domain)	AT2G17880	Chaperone DnaJ-domain superfamily protein
Medtr4g108700	1.8117	0.377707	4.79658	1.61399e-06	5.70702e-06		AT3G47510
Medtr4g052400	1.81116	0.239373	7.56625	3.84148e-14	2.43721e-13		AT3G11590
Medtr1g041380	1.81087	0.140388	12.899	4.56039e-38	8.58077e-37	PF12504(), PF12481(Aluminium induced protein )	AT3G22850	Aluminium induced protein with YGL and LRDR motifs
Medtr4g119930	1.80984	0.188388	9.60697	7.47151e-22	7.29549e-21	PF00888(Cullin family)	AT4G02570	cullin 1
Medtr6g059680	1.8093	0.445684	4.05961	4.91551e-05	0.00014872	PF00197(Trypsin and protease inhibitor)	AT1G17860	Kunitz family trypsin and protease inhibitor protein
MT4Noble_021153	1.80878	0.281709	6.42074	1.35609e-10	6.74744e-10
Medtr1g069340	1.80768	0.61767	2.92662	0.00342672	0.00796666	PF07714(Protein tyrosine kinase)	AT2G20300	Protein kinase superfamily protein
Medtr7g100630	1.80645	0.294159	6.14107	8.19661e-10	3.85199e-09	PF07714(Protein tyrosine kinase)	AT2G37050	Leucine-rich repeat protein kinase family protein
Medtr3g052490	1.80636	0.260606	6.93137	4.16797e-12	2.3257e-11	PF00657(GDSL-like Lipase/Acylhydrolase)	AT5G55050	GDSL-like Lipase/Acylhydrolase superfamily protein
Medtr6g045257	1.80565	0.215935	8.36203	6.16506e-17	4.63239e-16	PF00403(Heavy-metal-associated domain)	AT5G23760	Copper transport protein family
Medtr3g085050	1.80376	0.0903826	19.9569	1.30546e-88	1.03166e-86	PF00612(IQ calmodulin-binding motif), PF03859(CG-1 domain), PF00023(Ankyrin repeat), PF01833(IPT/TIG domain)	AT1G67310	Calmodulin-binding transcription activator protein with CG-1 and Ankyrin domains
Medtr7g111530	1.80356	0.0698494	25.8207	5.19731e-147	1.30527e-144	PF03489(Saposin-like type B, region 2), PF05184(Saposin-like type B, region 1), PF00026(Eukaryotic aspartyl protease)	AT1G11910	aspartic proteinase A1
Medtr1g095780	1.80351	0.0986751	18.2772	1.25693e-74	6.96246e-73	PF00153(Mitochondrial carrier protein)	AT2G35800	mitochondrial substrate carrier family protein
Medtr2g085025	1.80342	0.560658	3.21661	0.00129714	0.00323367	PF04949(Transcriptional activator)	AT2G27740	Family of unknown function (DUF662)
Medtr1g050472	1.8032	0.238719	7.55366	4.23184e-14	2.678e-13	PF00268(Ribonucleotide reductase, small chain)	AT3G27060	Ferritin/ribonucleotide reductase-like family protein
Medtr8g464690	1.80319	0.196131	9.19383	3.79081e-20	3.39808e-19	PF01221(Dynein light chain type 1 )	AT4G27360	Dynein light chain type 1 family protein
Medtr7g088470	1.80276	0.248453	7.25595	3.98853e-13	2.36542e-12	PF06964(Alpha-L-arabinofuranosidase C-terminus)	AT3G10740	alpha-L-arabinofuranosidase 1
Medtr2g082550	1.80239	0.341452	5.2786	1.30172e-07	5.10204e-07	PF01535(PPR repeat)	AT3G57430	Tetratricopeptide repeat (TPR)-like superfamily protein
Medtr8g468030	1.80106	0.242777	7.41859	1.18377e-13	7.26617e-13	PF01344(Kelch motif)	AT2G02870	Galactose oxidase/kelch repeat superfamily protein
Medtr3g117320	1.80074	0.326479	5.51563	3.47536e-08	1.43965e-07	PF00643(B-box zinc finger)	AT1G75540	salt tolerance homolog2
Medtr1g071540	1.80048	0.15458	11.6475	2.36185e-31	3.48399e-30	PF07765(KIP1-like protein)	AT1G03080	kinase interacting (KIP1-like) family protein
Medtr7g108070	1.80045	0.679902	2.6481	0.00809458	0.0175302	PF07765(KIP1-like protein)	AT1G03470	Kinase interacting (KIP1-like) family protein
Medtr3g102100	1.79972	0.156332	11.5121	1.14594e-30	1.64774e-29	PF00847(AP2 domain)	AT1G46768	related to AP2 1
Medtr5g041010	1.79882	0.723244	2.48716	0.0128768	0.0267772	PF00445(Ribonuclease T2 family)	AT1G14220	Ribonuclease T2 family protein
Medtr4g021450	1.79839	0.666962	2.6964	0.00700942	0.0153744	PF00248(Aldo/keto reductase family)	AT2G37770	NAD(P)-linked oxidoreductase superfamily protein
Medtr1g107355	1.79692	0.367618	4.88801	1.01859e-06	3.67538e-06
Medtr2g008100	1.79668	0.233663	7.68921	1.48051e-14	9.60062e-14		AT1G43710	Pyridoxal phosphate (PLP)-dependent transferases superfamily protein
Medtr1g013090	1.79426	0.310848	5.77212	7.82792e-09	3.40968e-08	PF00240(Ubiquitin family)	AT4G03430	pre-mRNA splicing factor-related
Medtr3g109430	1.79413	0.509416	3.52194	0.000428405	0.00114769		AT2G25735
Medtr5g007730	1.7938	0.231994	7.73211	1.05781e-14	6.94774e-14	PF02797(Chalcone and stilbene synthases, C-terminal domain), PF00195(Chalcone and stilbene synthases, N-terminal domain)	AT5G13930	Chalcone and stilbene synthase family protein
Medtr3g448370	1.79302	0.15242	11.7637	6.00653e-32	9.04489e-31	PF04059(RNA recognition motif 2), PF00076(RNA recognition motif. (a.k.a. RRM, RBD, or RNP domain))	AT1G29400	MEI2-like protein 5
Medtr4g133450	1.79294	0.604826	2.96439	0.00303282	0.00711844	PF05701(Weak chloroplast movement under blue light)	AT1G12150	Plant protein of unknown function (DUF827)
Medtr5g094010	1.79261	0.301948	5.93683	2.90581e-09	1.30971e-08		AT1G16240	syntaxin of plants 51
Medtr0340s0030	1.79202	0.314295	5.70171	1.18611e-08	5.095e-08	PF00656(Caspase domain)	AT1G79320	metacaspase 6
Medtr7g065640	1.78888	0.227297	7.87025	3.53929e-15	2.39359e-14	PF02798(Glutathione S-transferase, N-terminal domain)	AT2G29420	glutathione S-transferase tau 7
Medtr6g015315	1.78865	0.448758	3.98578	6.72582e-05	0.0002	PF02458(Transferase family)	AT5G39090	HXXXD-type acyl-transferase family protein
Medtr5g028020	1.7882	0.246492	7.25459	4.02866e-13	2.38827e-12	PF05542(Protein of unknown function (DUF760))	AT1G32160	Protein of unknown function (DUF760)
Medtr7g074880	1.78813	0.264358	6.76405	1.34189e-11	7.23297e-11	PF01370(NAD dependent epimerase/dehydratase family)	AT2G45400	NAD(P)-binding Rossmann-fold superfamily protein
Medtr3g022730	1.78808	0.492757	3.62872	0.000284826	0.000780978		AT3G14460	LRR and NB-ARC domains-containing disease resistance protein
Medtr4g134590	1.78569	0.101432	17.6047	2.26825e-69	1.0877e-67	PF04884(Vitamin B6 photo-protection and homoeostasis)	AT5G49820	Protein of unknown function, DUF647
Medtr8g094760	1.7845	0.123983	14.3931	5.71545e-47	1.49759e-45	PF05911(Filament-like plant protein, long coiled-coil)	AT1G77580	Plant protein of unknown function (DUF869)
Medtr7g405830	1.78178	0.34261	5.20061	1.98631e-07	7.6551e-07	PF02678(Pirin), PF05726(Pirin C-terminal cupin domain)	AT2G43120	RmlC-like cupins superfamily protein
Medtr7g083770	1.78136	0.470678	3.78467	0.000153912	0.000436895		AT5G61220	LYR family of Fe/S cluster biogenesis protein
Medtr2g041620	1.78044	0.103365	17.2248	1.72933e-66	7.71817e-65	PF00583(Acetyltransferase (GNAT) family)	AT2G06025	Acyl-CoA N-acyltransferases (NAT) superfamily protein
Medtr1g011650	1.77942	0.184635	9.63752	5.55154e-22	5.46396e-21	PF01061(ABC-2 type transporter), PF08370(Plant PDR ABC transporter associated), PF00005(ABC transporter)	AT1G15520	pleiotropic drug resistance 12
Medtr5g005370	1.77938	0.343744	5.17647	2.26119e-07	8.66104e-07	PF05770(Inositol 1, 3, 4-trisphosphate 5/6-kinase)	AT4G08170	Inositol 1,3,4-trisphosphate 5/6-kinase family protein
Medtr6g016260	1.77936	0.543149	3.27601	0.00105285	0.00265813	PF00069(Protein kinase domain)	AT5G58350	with no lysine (K) kinase 4
Medtr5g024990	1.7792	0.116253	15.3045	7.13757e-53	2.20565e-51	PF03982(Diacylglycerol acyltransferase )	AT3G51520	diacylglycerol acyltransferase family
Medtr7g103300	1.77896	0.137801	12.9096	3.97117e-38	7.4959e-37	PF01925(Sulfite exporter TauE/SafE)	AT2G36630	Sulfite exporter TauE/SafE family protein
Medtr5g032570	1.77855	0.235251	7.56021	4.02429e-14	2.54829e-13	PF00365(Phosphofructokinase)	AT2G22480	phosphofructokinase 5
Medtr8g030733	1.77801	0.370871	4.79415	1.63367e-06	5.77524e-06
Medtr4g123760	1.77795	0.240018	7.4076	1.28604e-13	7.87436e-13	PF02991(Autophagy protein Atg8 ubiquitin like)	AT3G06420	Ubiquitin-like superfamily protein
Medtr2g088230	1.77676	0.0871443	20.3887	2.10663e-92	1.79396e-90	PF02991(Autophagy protein Atg8 ubiquitin like)	AT2G05630	Ubiquitin-like superfamily protein
Medtr3g101930	1.77622	0.254966	6.9665	3.24928e-12	1.82788e-11	PF02458(Transferase family)	AT5G42830	HXXXD-type acyl-transferase family protein
Medtr7g451050	1.77544	0.364455	4.87148	1.10767e-06	3.98565e-06	PF10591(Secreted protein acidic and rich in cysteine Ca binding region)	AT3G24110	Calcium-binding EF-hand family protein
Medtr2g101560	1.77521	0.133962	13.2516	4.41648e-40	8.96454e-39	PF00854(POT family)	AT1G52190	Major facilitator superfamily protein
Medtr5g011340	1.77489	0.42784	4.14849	3.34678e-05	0.00010339	PF05922(Peptidase inhibitor I9), PF02225(PA domain), PF00082(Subtilase family)	AT5G67360	Subtilase family protein
Medtr3g007630	1.77304	0.417113	4.25074	2.13068e-05	6.7123e-05	PF00954(S-locus glycoprotein domain), PF00069(Protein kinase domain), PF11883(Domain of unknown function (DUF3403)), PF01453(D-mannose binding lectin), PF08276(PAN-like domain)	AT4G21380	receptor kinase 3
Medtr4g011670	1.7724	0.246934	7.17761	7.09421e-13	4.15488e-12
Medtr5g021390	1.77144	0.208796	8.48408	2.17438e-17	1.67894e-16	PF00067(Cytochrome P450)	AT4G36220	ferulic acid 5-hydroxylase 1
Medtr3g435150	1.77119	0.585517	3.02501	0.00248623	0.00591708	PF02365(No apical meristem (NAM) protein)	AT5G61430	NAC domain containing protein 100
Medtr7g086510	1.77058	0.128565	13.7718	3.76602e-43	8.62488e-42	PF00324(Amino acid permease)	AT3G03720	cationic amino acid transporter 4
Medtr3g067825	1.7699	0.53893	3.28411	0.00102306	0.00258778	PF03469(XH domain)	AT4G01780	XH/XS domain-containing protein
Medtr5g077430	1.76977	0.265654	6.66193	2.70255e-11	1.41777e-10	PF00069(Protein kinase domain), PF08263(Leucine rich repeat N-terminal domain), PF00560(Leucine Rich Repeat)	AT1G66150	transmembrane kinase 1
Medtr2g023430	1.76936	0.142047	12.4562	1.29374e-35	2.24079e-34	PF02991(Autophagy protein Atg8 ubiquitin like)	AT4G21980	Ubiquitin-like superfamily protein
Medtr2g042430	1.76854	0.108887	16.242	2.54305e-59	9.24702e-58	PF03088(Strictosidine synthase)	AT3G51420	strictosidine synthase-like 4
Medtr4g101090	1.76837	0.165542	10.6823	1.23161e-26	1.50635e-25	PF02991(Autophagy protein Atg8 ubiquitin like)	AT4G16520	Ubiquitin-like superfamily protein
Medtr1g066810	1.76823	0.790952	2.23557	0.0253799	0.049372	PF00226(DnaJ domain)	AT2G35795	Chaperone DnaJ-domain superfamily protein
Medtr0428s0020	1.76724	0.423875	4.16925	3.05603e-05	9.48114e-05	PF00889(Elongation factor TS)	AT4G29060	elongation factor Ts family protein
Medtr5g065130	1.76672	0.329593	5.36031	8.30786e-08	3.32293e-07	PF00069(Protein kinase domain), PF01657(Salt stress response/antifungal)	AT4G23180	cysteine-rich RLK (RECEPTOR-like protein kinase) 10
Medtr4g072330	1.76636	0.72768	2.42739	0.015208	0.0310541	PF02519(Auxin responsive protein)	AT4G38840	SAUR-like auxin-responsive protein family
Medtr8g090135	1.76616	0.582235	3.03341	0.00241806	0.00577058
Medtr4g043650	1.76556	0.195601	9.02631	1.7756e-19	1.5359e-18	PF07479(NAD-dependent glycerol-3-phosphate dehydrogenase C-terminus), PF01210(NAD-dependent glycerol-3-phosphate dehydrogenase N-terminus)	AT2G41540	6-phosphogluconate dehydrogenase family protein
Medtr5g096760	1.7653	0.332495	5.30925	1.10078e-07	4.35012e-07		AT3G13275
Medtr1g069355	1.76325	0.0914095	19.2896	6.57198e-83	4.48757e-81	PF00400(WD domain, G-beta repeat)	AT1G04140	Transducin family protein / WD-40 repeat family protein
Medtr4g068990	1.76301	0.296861	5.93884	2.87053e-09	1.2946e-08	PF00271(Helicase conserved C-terminal domain), PF00270(DEAD/DEAH box helicase)	AT5G54910	DEA(D/H)-box RNA helicase family protein
Medtr4g089100	1.76272	0.147904	11.918	9.54075e-33	1.48109e-31	PF06749(Protein of unknown function (DUF1218))	AT1G61065	Protein of unknown function (DUF1218)
Medtr2g069420	1.76177	0.43365	4.06266	4.85158e-05	0.000146876		AT2G32210
Medtr6g015150	1.76125	0.639037	2.75609	0.00584964	0.0130371		AT5G39240
Medtr4g078555	1.76124	0.577957	3.04735	0.0023087	0.00552966	PF08311(Mad3/BUB1 homology region 1), PF00069(Protein kinase domain)	AT2G20635	ATP binding;protein kinases;protein serine/threonine kinases
Medtr6g082330	1.76121	0.551604	3.19288	0.0014086	0.00348942		AT4G05030	Copper transport protein family
Medtr4g060790	1.76104	0.25442	6.92177	4.46032e-12	2.48415e-11	PF09810(Exonuclease V - a 5' deoxyribonuclease)	AT5G60370
Medtr6g025740	1.76034	0.596432	2.95145	0.00316289	0.00739562
Medtr2g084315	1.75929	0.424614	4.14326	3.42397e-05	0.000105609		AT2G28200	C2H2-type zinc finger family protein
Medtr5g023150	1.75897	0.116083	15.1528	7.26267e-52	2.17184e-50	PF01842(ACT domain), PF07714(Protein tyrosine kinase)	AT4G35780	ACT-like protein tyrosine kinase family protein
Medtr4g007300	1.75879	0.175016	10.0493	9.25098e-24	9.88651e-23	PF00226(DnaJ domain)	AT1G80920	Chaperone DnaJ-domain superfamily protein
Medtr4g009510	1.75811	0.340832	5.15829	2.49221e-07	9.50536e-07		AT4G37850	basic helix-loop-helix (bHLH) DNA-binding superfamily protein
Medtr5g017790	1.75605	0.145139	12.0991	1.06808e-33	1.73628e-32	PF04784(Protein of unknown function, DUF547)	AT4G37080	Protein of unknown function, DUF547
Medtr2g011270	1.75604	0.239103	7.34429	2.06849e-13	1.25025e-12	PF00954(S-locus glycoprotein domain), PF07714(Protein tyrosine kinase), PF08276(PAN-like domain), PF01453(D-mannose binding lectin)	AT1G11330	S-locus lectin protein kinase family protein
Medtr5g009460	1.75544	0.353897	4.96033	7.03751e-07	2.5761e-06		AT2G30420	Homeodomain-like superfamily protein
Medtr4g098460	1.75463	0.152046	11.5401	8.28061e-31	1.19822e-29	PF03479(Domain of unknown function (DUF296))	AT4G17950	AT hook motif DNA-binding family protein
Medtr2g036060	1.75407	0.131461	13.3429	1.30378e-40	2.69815e-39	PF00856(SET domain), PF02213(GYF domain)	AT5G42400	SET domain protein 25
Medtr3g076550	1.75071	0.702909	2.49066	0.0127506	0.0265354	PF00067(Cytochrome P450)	AT3G48300	cytochrome P450, family 71, subfamily A, polypeptide 23
Medtr3g104600	1.7498	0.17677	9.89871	4.21658e-23	4.37529e-22	PF00153(Mitochondrial carrier protein)	AT1G14560	Mitochondrial substrate carrier family protein
Medtr8g465860	1.74889	0.483181	3.61953	0.000295143	0.000807698
Medtr4g124005	1.74854	0.503224	3.47468	0.000511472	0.00135565
Medtr3g109420	1.74695	0.239631	7.29015	3.09607e-13	1.84947e-12	PF01152(Bacterial-like globin)	AT4G32690	hemoglobin 3
Medtr7g072630	1.74693	0.299932	5.82444	5.7306e-09	2.52342e-08	PF04844(Transcriptional repressor, ovate)	AT5G01840	ovate family protein 1
Medtr1g062200	1.74606	0.499016	3.49902	0.000466979	0.00124395		AT1G22060
Medtr1g034290	1.74543	0.180737	9.65731	4.57722e-22	4.52454e-21		AT2G15960
Medtr2g041960	1.74531	0.301594	5.78694	7.16797e-09	3.1317e-08	PF07714(Protein tyrosine kinase)	AT2G05940	Protein kinase superfamily protein
Medtr7g016820	1.74487	0.330953	5.27225	1.34765e-07	5.27786e-07	PF02797(Chalcone and stilbene synthases, C-terminal domain), PF00195(Chalcone and stilbene synthases, N-terminal domain)	AT5G13930	Chalcone and stilbene synthase family protein
Medtr1g026070	1.74445	0.329725	5.29062	1.21902e-07	4.79437e-07	PF00097(Zinc finger, C3HC4 type (RING finger))	AT5G42200	RING/U-box superfamily protein
Medtr1g106030	1.74099	0.147828	11.7771	5.11967e-32	7.74484e-31	PF06404(Phytosulfokine precursor protein (PSK))	AT3G49780	phytosulfokine 4 precursor
Medtr1g099420	1.74038	0.0908196	19.163	7.54049e-82	4.95482e-80	PF02517(CAAX protease self-immunity)	AT5G60750	CAAX amino terminal protease family protein
Medtr1g032220	1.74028	0.146006	11.9192	9.39609e-33	1.4594e-31	PF03171(2OG-Fe(II) oxygenase superfamily)	AT1G03410	2-oxoglutarate (2OG) and Fe(II)-dependent oxygenase superfamily protein
Medtr2g064940	1.73908	0.63402	2.74294	0.00608917	0.0135272	PF00069(Protein kinase domain)	AT1G16670	Protein kinase superfamily protein
Medtr5g013020	1.73783	0.0803597	21.6256	1.03073e-103	1.09091e-101	PF02089(Palmitoyl protein thioesterase)	AT3G60340	alpha/beta-Hydrolases superfamily protein
Medtr3g088580	1.73769	0.0952682	18.2399	2.48793e-74	1.36537e-72		AT1G21760	F-box protein 7
Medtr7g112800	1.73753	0.456307	3.80781	0.000140201	0.000399968
Medtr2g098030	1.73725	0.0868335	20.0066	4.81999e-89	3.86055e-87	PF02738(Molybdopterin-binding domain of aldehyde dehydrogenase), PF03450(CO dehydrogenase flavoprotein C-terminal domain), PF00941(FAD binding domain in molybdopterin dehydrogenase), PF00111(2Fe-2S iron-sulfur cluster binding domain), PF01315(Aldehyde oxidase and xanthine dehydrogenase, a/b hammerhead domain), PF01799([2Fe-2S] binding domain)	AT4G34890	xanthine dehydrogenase 1
Medtr7g112460	1.73485	0.089209	19.447	3.08914e-84	2.18488e-82	PF00400(WD domain, G-beta repeat)	AT5G27030	TOPLESS-related 3
Medtr4g033300	1.73426	0.284231	6.10158	1.05026e-09	4.89841e-09
Medtr2g041430	1.73412	0.191868	9.03811	1.59407e-19	1.38453e-18	PF08879(WRC), PF08880(QLQ)	AT3G13960	growth-regulating factor 5
Medtr2g010890	1.73325	0.584776	2.96396	0.00303709	0.00712734	PF03000(NPH3 family)	AT3G22104	Phototropic-responsive NPH3 family protein
Medtr0001s0560	1.7329	0.681648	2.54223	0.0110149	0.0232117
Medtr8g028140	1.73246	0.167955	10.315	6.02693e-25	6.81191e-24		AT3G07550	RNI-like superfamily protein
Medtr5g062660	1.73152	0.233103	7.42812	1.10148e-13	6.76668e-13	PF00293(NUDIX domain)	AT1G68760	nudix hydrolase 1
Medtr4g033435	1.73112	0.150285	11.5189	1.05927e-30	1.52608e-29	PF03765(CRAL/TRIO, N-terminal domain), PF00650(CRAL/TRIO domain)	AT1G22530	PATELLIN 2
Medtr3g079610	1.73047	0.43514	3.97681	6.98458e-05	0.00020732
Medtr8g014590	1.7277	0.125996	13.7124	8.55974e-43	1.92757e-41	PF00009(Elongation factor Tu GTP binding domain), PF03144(Elongation factor Tu domain 2), PF03143(Elongation factor Tu C-terminal domain)	AT5G60390	GTP binding Elongation factor Tu family protein
Medtr7g112403	1.72768	0.123625	13.9752	2.20865e-44	5.29987e-43	PF05605(Drought induced 19 protein (Di19), zinc-binding)	AT3G05700	Drought-responsive family protein
Medtr3g098680	1.72353	0.314705	5.47664	4.33479e-08	1.78147e-07	PF03114(BAR domain), PF01412(Putative GTPase activating protein for Arf), PF00169(PH domain), PF00023(Ankyrin repeat)	AT5G61980	ARF-GAP domain 1
Medtr5g073090	1.72327	0.299586	5.75219	8.80942e-09	3.82236e-08
Medtr3g107630	1.7226	0.698606	2.46577	0.013672	0.0282288	PF02230(Phospholipase/Carboxylesterase)	AT5G20060	alpha/beta-Hydrolases superfamily protein
Medtr3g101430	1.71979	0.384043	4.47811	7.53073e-06	2.48911e-05		AT2G14740	vaculolar sorting receptor 3
Medtr2g103850	1.71911	0.314789	5.46117	4.72996e-08	1.93769e-07	PF04525(LURP-one-related)	AT3G15810	Protein of unknown function (DUF567)
Medtr1g110090	1.71891	0.275822	6.23197	4.6062e-10	2.20133e-09		AT1G18390	Protein kinase superfamily protein
Medtr4g129950	1.71715	0.0885524	19.3914	9.1219e-84	6.37565e-82	PF03969(AFG1-like ATPase)	AT4G30490	AFG1-like ATPase family protein
Medtr6g090380	1.71542	0.257744	6.65554	2.82253e-11	1.47888e-10		AT4G29190	Zinc finger C-x8-C-x5-C-x3-H type family protein
Medtr3g109870	1.71518	0.147203	11.6517	2.2484e-31	3.32326e-30	PF12146(Serine aminopeptidase, S33)	AT5G11650	alpha/beta-Hydrolases superfamily protein
Medtr2g011280	1.71444	0.31845	5.3837	7.29697e-08	2.93413e-07	PF00954(S-locus glycoprotein domain), PF07714(Protein tyrosine kinase), PF08276(PAN-like domain), PF01453(D-mannose binding lectin)	AT1G11330	S-locus lectin protein kinase family protein
Medtr1g484960	1.71414	0.254785	6.72779	1.72255e-11	9.17795e-11	PF00225(Kinesin motor domain)	AT3G10180	P-loop containing nucleoside triphosphate hydrolases superfamily protein
Medtr1g083400	1.71398	0.170066	10.0784	6.88718e-24	7.42728e-23	PF00076(RNA recognition motif. (a.k.a. RRM, RBD, or RNP domain))	AT1G09140	SERINE-ARGININE PROTEIN 30
Medtr7g064070	1.71347	0.548669	3.12296	0.00179043	0.00436738
Medtr1g086310	1.71263	0.106838	16.0302	7.86812e-58	2.76926e-56	PF02991(Autophagy protein Atg8 ubiquitin like)	AT3G06420	Ubiquitin-like superfamily protein
Medtr2g011820	1.71221	0.120075	14.2595	3.91212e-46	9.97726e-45	PF00781(Diacylglycerol kinase catalytic domain)	AT4G21540	sphingosine kinase 1
Medtr4g054920	1.71169	0.604376	2.83215	0.00462355	0.0104931	PF00067(Cytochrome P450)	AT2G27690	cytochrome P450, family 94, subfamily C, polypeptide 1
Medtr2g022840	1.71125	0.123206	13.8893	7.35144e-44	1.72905e-42	PF01066(CDP-alcohol phosphatidyltransferase)	AT4G04870	cardiolipin synthase
Medtr5g042520	1.71113	0.198099	8.63773	5.73412e-18	4.58281e-17		AT1G13990
Medtr5g030360	1.711	0.306791	5.57709	2.44577e-08	1.02609e-07	PF00443(Ubiquitin carboxyl-terminal hydrolase)	AT4G17895	ubiquitin-specific protease 20
Medtr7g085440	1.71072	0.140206	12.2015	3.05242e-34	5.0592e-33	PF07491(Protein phosphatase inhibitor ), PF04654(Protein of unknown function, DUF599)	AT5G46060	Protein of unknown function, DUF599
Medtr2g007330	1.71059	0.140627	12.164	4.83516e-34	7.95172e-33	PF04842(Plant protein of unknown function (DUF639))	AT1G71240	Plant protein of unknown function (DUF639)
Medtr1g036460	1.71047	0.309225	5.53149	3.17516e-08	1.31843e-07	PF00891(O-methyltransferase), PF08100(Dimerisation domain)	AT5G54160	O-methyltransferase 1
Medtr4g133060	1.70995	0.312241	5.47637	4.34138e-08	1.78393e-07	PF02115(RHO protein GDP dissociation inhibitor)	AT3G07880	Immunoglobulin E-set superfamily protein
Medtr1g017990	1.70886	0.209889	8.14173	3.89663e-16	2.80011e-15		AT1G59590	ZCF37
Medtr4g013770	1.7088	0.224513	7.61115	2.71671e-14	1.73625e-13	PF03018(Dirigent-like protein)	AT1G58170	Disease resistance-responsive (dirigent-like protein) family protein
Medtr6g087290	1.70851	0.270835	6.30828	2.8216e-10	1.37034e-09		AT4G24840
Medtr1g019270	1.70764	0.489893	3.48574	0.000490784	0.00130338	PF01764(Lipase (class 3))	AT5G42930	alpha/beta-Hydrolases superfamily protein
Medtr2g031460	1.7076	0.301943	5.65537	1.55509e-08	6.6214e-08	PF01565(FAD binding domain ), PF08031(Berberine and berberine like )	AT2G34790	FAD-binding Berberine family protein
Medtr8g464390	1.70641	0.0903608	18.8844	1.53275e-79	9.6235e-78	PF01412(Putative GTPase activating protein for Arf)	AT5G54310	ARF-GAP domain 5
Medtr4g033215	1.70616	0.10722	15.9127	5.17271e-57	1.76809e-55	PF00168(C2 domain), PF08372(Plant phosphoribosyltransferase C-terminal)	AT1G22610	C2 calcium/lipid-binding plant phosphoribosyltransferase family protein
Medtr1g080700	1.70597	0.164342	10.3806	3.03775e-25	3.4718e-24	PF00538(linker histone H1 and H5 family)	AT2G30620	winged-helix DNA-binding transcription factor family protein
Medtr8g095080	1.70592	0.218353	7.81266	5.59933e-15	3.74151e-14	PF05003(Protein of unknown function (DUF668)), PF11961(Domain of unknown function (DUF3475))	AT1G34320	Protein of unknown function (DUF668)
Medtr4g033295	1.70512	0.114584	14.881	4.38018e-50	1.24575e-48		AT1G35460	basic helix-loop-helix (bHLH) DNA-binding superfamily protein
Medtr2g079900	1.70481	0.494855	3.44506	0.000570929	0.00150115	PF01582(TIR domain)	AT1G52900	Toll-Interleukin-Resistance (TIR) domain family protein
Medtr1g096780	1.70471	0.0732786	23.2634	1.04066e-119	1.49709e-117	PF00097(Zinc finger, C3HC4 type (RING finger)), PF02225(PA domain)	AT1G71980	Protease-associated (PA) RING/U-box zinc finger family protein
Medtr1g017900	1.70468	0.135922	12.5416	4.41745e-36	7.76921e-35
Medtr2g068840	1.70466	0.162032	10.5205	6.94684e-26	8.21507e-25	PF03171(2OG-Fe(II) oxygenase superfamily)	AT3G12900	2-oxoglutarate (2OG) and Fe(II)-dependent oxygenase superfamily protein
Medtr7g091490	1.7034	0.182558	9.33073	1.05149e-20	9.71046e-20	PF03942(DTW domain)	AT2G41750	DTW domain-containing protein
Medtr4g131020	1.7023	0.165079	10.312	6.21727e-25	7.01901e-24	PF10409(C2 domain of PTEN tumour-suppressor protein), PF02181(Formin Homology 2 Domain)	AT5G58160	actin binding
Medtr4g134290	1.70185	0.2126	8.00494	1.19526e-15	8.32858e-15	PF00365(Phosphofructokinase)	AT5G47810	phosphofructokinase 2
Medtr5g091100	1.70002	0.363969	4.67078	3.00055e-06	1.03445e-05
Medtr1g075250	1.69968	0.587476	2.89319	0.00381355	0.00877871	PF06414(Zeta toxin)	AT1G06750	P-loop containing nucleoside triphosphate hydrolases superfamily protein
Medtr1g082370	1.69963	0.638273	2.66286	0.0077479	0.0168545
Medtr8g063470	1.69918	0.232625	7.30434	2.78623e-13	1.67044e-12	PF01202(Shikimate kinase)	AT2G16790	P-loop containing nucleoside triphosphate hydrolases superfamily protein
Medtr3g078240	1.69885	0.157798	10.766	4.98187e-27	6.17731e-26		AT5G14890	NHL domain-containing protein
Medtr1g095730	1.69858	0.379748	4.47291	7.7161e-06	2.54753e-05
Medtr2g102640	1.69814	0.17065	9.95104	2.49553e-23	2.61233e-22	PF01061(ABC-2 type transporter), PF08370(Plant PDR ABC transporter associated), PF00005(ABC transporter)	AT1G15520	pleiotropic drug resistance 12
Medtr1g100763	1.69744	0.633923	2.67768	0.00741347	0.0161745	PF07734(F-box associated), PF00646(F-box domain)	AT2G04920	F-box and associated interaction domains-containing protein
Medtr1g106630	1.69689	0.241757	7.019	2.23469e-12	1.2677e-11
Medtr8g011710	1.69645	0.352768	4.80896	1.51721e-06	5.38345e-06	PF00931(NB-ARC domain), PF01582(TIR domain)	AT5G36930	Disease resistance protein (TIR-NBS-LRR class) family
Medtr5g069580	1.6941	0.759208	2.2314	0.0256546	0.0498507	PF08263(Leucine rich repeat N-terminal domain), PF00560(Leucine Rich Repeat)	AT2G34930	disease resistance family protein / LRR family protein
Medtr4g077740	1.6936	0.105798	16.0078	1.12757e-57	3.94518e-56	PF00083(Sugar (and other) transporter)	AT5G17010	Major facilitator superfamily protein
Medtr5g087690	1.69141	0.443364	3.81494	0.000136216	0.000389461	PF00657(GDSL-like Lipase/Acylhydrolase)	AT4G10950	SGNH hydrolase-type esterase superfamily protein
Medtr6g065650	1.69109	0.101338	16.6876	1.61422e-62	6.46452e-61	PF00571(CBS domain), PF00654(Voltage gated chloride channel)	AT5G49890	chloride channel C
Medtr1g109600	1.69017	0.158415	10.6692	1.41817e-26	1.73095e-25
Medtr7g112550	1.68988	0.158558	10.6578	1.60374e-26	1.95182e-25		AT1G09155	phloem protein 2-B15
Medtr6g032770	1.68975	0.308263	5.48151	4.21707e-08	1.73551e-07	PF02365(No apical meristem (NAM) protein)	AT5G18270	Arabidopsis NAC domain containing protein 87
Medtr7g108950	1.68961	0.701783	2.4076	0.016058	0.0326212		AT1G30600	Subtilase family protein
Medtr2g044600	1.68919	0.139427	12.1152	8.7755e-34	1.42891e-32		AT1G34630
Medtr1g080990	1.68826	0.257827	6.54803	5.82994e-11	2.9824e-10		AT4G14746
Medtr8g098885	1.68749	0.156317	10.7953	3.62214e-27	4.5273e-26		AT2G26210	Ankyrin repeat family protein
Medtr2g013580	1.68684	0.113065	14.9191	2.47521e-50	7.09409e-49	PF02364(1,3-beta-glucan synthase component )	AT4G04970	glucan synthase-like 1
Medtr1g097910	1.6867	0.265772	6.34642	2.20383e-10	1.07898e-09	PF02797(Chalcone and stilbene synthases, C-terminal domain), PF00195(Chalcone and stilbene synthases, N-terminal domain)	AT5G13930	Chalcone and stilbene synthase family protein
Medtr5g071380	1.6862	0.15002	11.2398	2.59857e-29	3.56356e-28	PF04900(Fcf1)	AT2G34570	PIN domain-like family protein
Medtr2g064470	1.68597	0.182642	9.23098	2.68161e-20	2.42507e-19	PF02365(No apical meristem (NAM) protein)	AT1G56010	NAC domain containing protein 1
Medtr4g010130	1.6819	0.656481	2.562	0.0104071	0.0220581		AT1G17870	ethylene-dependent gravitropism-deficient and yellow-green-like 3
MT4Noble_051321	1.68108	0.188841	8.90208	5.48076e-19	4.60642e-18
Medtr1g087370	1.67724	0.198391	8.45425	2.80894e-17	2.15599e-16	PF02269(Transcription initiation factor IID, 18kD subunit)	AT1G02680	TBP-associated factor 13
Medtr1g069000	1.67702	0.0841572	19.9272	2.36543e-88	1.84472e-86	PF01412(Putative GTPase activating protein for Arf)	AT2G37550	ARF-GAP domain 7
Medtr4g063557	1.67685	0.0834409	20.0963	7.9545e-90	6.4584e-88	PF00076(RNA recognition motif. (a.k.a. RRM, RBD, or RNP domain))	AT5G59950	RNA-binding (RRM/RBD/RNP motifs) family protein
Medtr4g059670	1.67634	0.456266	3.67405	0.000238734	0.000661389	PF06830(Root cap)	AT5G60530	late embryogenesis abundant protein-related / LEA protein-related
Medtr8g069800	1.6763	0.354764	4.72512	2.29984e-06	8.0147e-06		AT1G23390	Kelch repeat-containing F-box family protein
Medtr7g029015	1.67624	0.118223	14.1786	1.24219e-45	3.10653e-44	PF06813(Nodulin-like)	AT5G14120	Major facilitator superfamily protein
Medtr1g070455	1.67591	0.138923	12.0636	1.64446e-33	2.65289e-32	PF10533(Plant zinc cluster domain), PF03106(WRKY DNA -binding domain)	AT2G30590	WRKY DNA-binding protein 21
Medtr1g116970	1.67412	0.166589	10.0494	9.24449e-24	9.88313e-23	PF00097(Zinc finger, C3HC4 type (RING finger))	AT1G26800	RING/U-box superfamily protein
MT4Noble_037169	1.67406	0.450047	3.71976	0.000199415	0.000558042
Medtr8g097040	1.67389	0.155008	10.7988	3.48851e-27	4.36948e-26		AT1G27290
Medtr2g029800	1.67386	0.145299	11.5201	1.04469e-30	1.50581e-29	PF00141(Peroxidase)	AT2G38380	Peroxidase superfamily protein
Medtr4g065023	1.67236	0.107142	15.6087	6.34913e-55	2.05187e-53	PF03054(tRNA methyl transferase)	AT1G51310	transferases;tRNA (5-methylaminomethyl-2-thiouridylate)-methyltransferases
Medtr3g113920	1.67213	0.422283	3.95973	7.50331e-05	0.000221917	PF00810(ER lumen protein retaining receptor)	AT1G75760	ER lumen protein retaining receptor family protein
Medtr6g035295	1.66969	0.497603	3.35546	0.000792337	0.00204022	PF00201(UDP-glucoronosyl and UDP-glucosyl transferase)	AT4G34131	UDP-glucosyl transferase 73B3
Medtr5g080360	1.66793	0.59406	2.80767	0.00499007	0.0112525		AT3G11430	glycerol-3-phosphate acyltransferase 5
Medtr3g016255	1.66756	0.282205	5.90904	3.44098e-09	1.54178e-08
Medtr5g083720	1.66668	0.0802437	20.7702	8.05114e-96	7.23017e-94	PF00565(Staphylococcal nuclease homologue)	AT2G40410	Staphylococcal nuclease homologue
Medtr1g083950	1.6666	0.156342	10.6599	1.56689e-26	1.90932e-25	PF00582(Universal stress protein family)	AT3G62550	Adenine nucleotide alpha hydrolases-like superfamily protein
Medtr7g098010	1.66521	0.103732	16.053	5.45003e-58	1.92276e-56	PF02450(Lecithin:cholesterol acyltransferase)	AT1G04010	phospholipid sterol acyl transferase 1
Medtr1g069430	1.66513	0.116994	14.2327	5.74193e-46	1.45687e-44	PF08240(Alcohol dehydrogenase GroES-like domain), PF00107(Zinc-binding dehydrogenase)	AT5G43940	GroES-like zinc-binding dehydrogenase family protein
Medtr8g071890	1.66427	0.132295	12.58	2.72022e-36	4.81851e-35		AT1G80660	H()-ATPase 9
Medtr8g070480	1.66376	0.147422	11.2857	1.54423e-29	2.14448e-28	PF07082(Protein of unknown function (DUF1350))	AT5G47860	Protein of unknown function (DUF1350)
Medtr5g092140	1.66307	0.168806	9.85194	6.7235e-23	6.90645e-22		AT4G27020
Medtr3g084260	1.66278	0.425208	3.91051	9.20998e-05	0.000269781	PF02519(Auxin responsive protein)	AT4G38840	SAUR-like auxin-responsive protein family
Medtr8g037205	1.66264	0.741036	2.24367	0.0248534	0.0484496		AT1G07985	Expressed protein
Medtr1g098250	1.66262	0.417253	3.98467	6.75748e-05	0.000200901		AT4G09830	Uncharacterised conserved protein UCP009193
Medtr8g104210	1.6619	0.104656	15.8796	8.76937e-57	2.97346e-55		AT5G16110
Medtr1g076930	1.66106	0.715268	2.32228	0.0202177	0.0402088	PF00891(O-methyltransferase), PF08100(Dimerisation domain)	AT4G35160	O-methyltransferase family protein
Medtr1g036490	1.66074	0.270699	6.135	8.5161e-10	3.99833e-09	PF00891(O-methyltransferase), PF08100(Dimerisation domain)	AT5G54160	O-methyltransferase 1
[truncated: 6,653 more rows]

## Sheet: 2dd.0dd
Gene ID	log2FoldChange	lfcSE	stat	pvalue	padj	Gene description	Arabidopsis hit description	Annotation
Medtr1g077520	10.8829	1.07438	10.1295	4.08887e-24	2.98375e-23	PF02065(Melibiase)	AT5G08370	alpha-galactosidase 2
Medtr6g059530	9.76358	0.550691	17.7297	2.47345e-70	8.15418e-69	PF00197(Trypsin and protease inhibitor)	AT1G73260	kunitz trypsin inhibitor 1
Medtr1g073780	9.72727	1.23861	7.85337	4.05002e-15	1.9761e-14		AT1G06137
Medtr7g077160	9.44483	0.6138	15.3875	1.98612e-53	3.98412e-52	PF00228(Bowman-Birk serine protease inhibitor family)
Medtr3g085020	9.37168	0.932196	10.0533	8.88007e-24	6.37994e-23	PF11820(Protein of unknown function (DUF3339))	AT3G48660	Protein of unknown function (DUF 3339)
Medtr2g045280	9.32989	0.671278	13.8987	6.45084e-44	9.7629e-43	PF00383(Cytidine and deoxycytidylate deaminase zinc-binding region)	AT5G28050	Cytidine/deoxycytidylate deaminase family protein
Medtr4g043760	9.32538	1.2378	7.53381	4.92794e-14	2.27442e-13	PF00150(Cellulase (glycosyl hydrolase family 5))	AT5G66460	Glycosyl hydrolase superfamily protein
Medtr4g105250	9.30562	2.04524	4.54989	5.36735e-06	1.45706e-05	PF05691(Raffinose synthase or seed imbibition protein Sip1)	AT5G40390	Raffinose synthase family protein
Medtr1g075380	9.30122	0.826858	11.2489	2.3458e-29	2.10932e-28	PF00280(Potato inhibitor I family)	AT2G38870	Serine protease inhibitor, potato inhibitor I-type family protein
Medtr5g017850	9.13986	1.33906	6.8256	8.75592e-12	3.56994e-11	PF00141(Peroxidase)	AT1G49570	Peroxidase superfamily protein
Medtr5g017670	8.99664	0.429037	20.9694	1.24902e-97	8.07829e-96	PF01734(Patatin-like phospholipase)	AT4G37070	Acyl transferase/acyl hydrolase/lysophospholipase superfamily protein
Medtr7g072480	8.97954	0.858092	10.4645	1.25677e-25	9.76904e-25	PF00141(Peroxidase)	AT5G05340	Peroxidase superfamily protein
Medtr4g066210	8.97297	0.803369	11.1692	5.77137e-29	5.1162e-28	PF00232(Glycosyl hydrolase family 1)	AT2G44480	beta glucosidase 17
Medtr4g080700	8.96548	0.784069	11.4346	2.80953e-30	2.61769e-29	PF00112(Papain family cysteine protease), PF08246(Cathepsin propeptide inhibitor domain (I29))	AT5G45890	senescence-associated gene 12
Medtr5g024080	8.93867	0.78335	11.4108	3.69204e-30	3.42666e-29	PF01301(Glycosyl hydrolases family 35), PF02140(Galactose binding lectin domain)	AT5G20710	beta-galactosidase 7
Medtr1308s0010	8.93276	1.22612	7.28537	3.2079e-13	1.41404e-12		AT1G19250	flavin-dependent monooxygenase 1
Medtr5g090070	8.92686	0.745587	11.9729	4.92625e-33	5.14305e-32	PF00266(Aminotransferase class-V)	AT2G13360	alanine:glyoxylate aminotransferase
Medtr1g082320	8.84748	1.20686	7.33099	2.28455e-13	1.01682e-12	PF11250(Fantastic Four meristem regulator)	AT1G54740	Protein of unknown function (DUF3049)
Medtr1372s0010	8.83054	1.23931	7.12538	1.03796e-12	4.46081e-12	PF00743(Flavin-binding monooxygenase-like)	AT5G45180	Flavin-binding monooxygenase family protein
Medtr6g023910	8.80575	0.853105	10.322	5.60452e-25	4.24437e-24	PF00106(short chain dehydrogenase)	AT2G47140	NAD(P)-binding Rossmann-fold superfamily protein
Medtr1g013100	8.80247	1.35603	6.49136	8.50663e-11	3.26784e-10	PF05910(Plant protein of unknown function (DUF868))	AT5G11000	Plant protein of unknown function (DUF868)
Medtr7g052300	8.79816	1.23831	7.10497	1.2035e-12	5.15382e-12		AT3G56500	serine-rich protein-related
Medtr1g492860	8.78363	1.21539	7.227	4.93769e-13	2.15807e-12	PF00400(WD domain, G-beta repeat)	AT1G80670	Transducin/WD40 repeat-like superfamily protein
Medtr7g068420	8.77775	1.22301	7.17718	7.11618e-13	3.08218e-12
Medtr4g083660	8.76462	1.56644	5.59526	2.20295e-08	7.20316e-08	PF00295(Glycosyl hydrolases family 28)	AT3G59850	Pectin lyase-like superfamily protein
Medtr3g103580	8.75224	0.509145	17.1901	3.15198e-66	9.1563e-65	PF01063(Amino-transferase class IV)	AT1G10070	branched-chain amino acid transaminase 2
Medtr5g040430	8.7099	0.545723	15.9603	2.41568e-57	5.50416e-56	PF02798(Glutathione S-transferase, N-terminal domain)	AT5G62480	glutathione S-transferase tau 9
Medtr5g090250	8.69656	0.68612	12.675	8.13808e-37	9.7286e-36	PF00280(Potato inhibitor I family)	AT2G38870	Serine protease inhibitor, potato inhibitor I-type family protein
Medtr1g075410	8.67711	0.771191	11.2516	2.27506e-29	2.04699e-28	PF00280(Potato inhibitor I family)	AT2G38870	Serine protease inhibitor, potato inhibitor I-type family protein
Medtr6g059410	8.67133	0.505193	17.1644	4.90687e-66	1.4197e-64	PF00197(Trypsin and protease inhibitor)	AT1G73260	kunitz trypsin inhibitor 1
Medtr5g067740	8.61717	1.19812	7.19227	6.37235e-13	2.76416e-12		AT5G05220
Medtr3g107500	8.5902	1.26436	6.79411	1.08982e-11	4.42091e-11	PF03330(Rare lipoprotein A (RlpA)-like double-psi beta-barrel)	AT2G18660	plant natriuretic peptide A
Medtr1g077480	8.57035	0.704867	12.1588	5.15059e-34	5.55832e-33	PF02065(Melibiase)	AT5G08370	alpha-galactosidase 2
Medtr2g094020	8.53982	0.649611	13.1461	1.79293e-39	2.31716e-38	PF01301(Glycosyl hydrolases family 35), PF02140(Galactose binding lectin domain), PF02837(Glycosyl hydrolases family 2, sugar binding domain)	AT2G28470	beta-galactosidase 8
Medtr5g090290	8.53582	1.32029	6.46513	1.01215e-10	3.86452e-10	PF01554(MatE)	AT3G59030	MATE efflux family protein
Medtr2g029750	8.53526	1.23427	6.91521	4.67176e-12	1.93707e-11	PF00141(Peroxidase)	AT2G38380	Peroxidase superfamily protein
Medtr5g062890	8.53503	0.969944	8.79951	1.37414e-18	7.91343e-18		AT5G22810	GDSL-like Lipase/Acylhydrolase superfamily protein
Medtr8g091290	8.52752	1.27832	6.67089	2.54252e-11	1.00896e-10	PF00929(Exonuclease)	AT4G39810	Polynucleotidyl transferase, ribonuclease H-like superfamily protein
Medtr8g461330	8.52307	1.26592	6.73273	1.6651e-11	6.67937e-11	PF03171(2OG-Fe(II) oxygenase superfamily)	AT1G78440	Arabidopsis thaliana gibberellin 2-oxidase 1
Medtr2g055790	8.50016	0.385964	22.0232	1.72579e-107	1.36389e-105	PF00097(Zinc finger, C3HC4 type (RING finger))	AT3G05200	RING/U-box superfamily protein
Medtr3g111530	8.49641	0.695827	12.2105	2.73136e-34	2.97653e-33	PF00067(Cytochrome P450)	AT5G42650	allene oxide synthase
Medtr4g032845	8.49195	2.06997	4.10246	4.08788e-05	0.000102449	PF08387(FBD), PF00646(F-box domain)	AT3G14710	RNI-like superfamily protein
Medtr2g008030	8.49193	0.565241	15.0236	5.14753e-51	9.72401e-50	PF00316(Fructose-1-6-bisphosphatase)	AT1G43670	Inositol monophosphatase family protein
Medtr7g082570	8.47869	0.770296	11.0071	3.53349e-28	3.03445e-27	PF07722(Peptidase C26)	AT5G38200	Class I glutamine amidotransferase-like superfamily protein
Medtr1088s0010	8.46612	1.21864	6.94718	3.72651e-12	1.55519e-11	PF00743(Flavin-binding monooxygenase-like)	AT1G19250	flavin-dependent monooxygenase 1
Medtr7g066690	8.45374	0.384249	22.0007	2.83499e-107	2.22828e-105	PF00153(Mitochondrial carrier protein)	AT3G54110	plant uncoupling mitochondrial protein 1
Medtr2g029740	8.45316	1.27293	6.64071	3.12168e-11	1.23252e-10	PF00141(Peroxidase)	AT2G38380	Peroxidase superfamily protein
Medtr3g095680	8.44303	0.635172	13.2925	2.55828e-40	3.41491e-39	PF00069(Protein kinase domain)	AT1G49160	Protein kinase superfamily protein
Medtr2g031590	8.36709	0.695063	12.0379	2.24649e-33	2.37632e-32	PF01565(FAD binding domain ), PF08031(Berberine and berberine like )	AT1G30700	FAD-binding Berberine family protein
Medtr3g101960	8.36372	0.501172	16.6883	1.5933e-62	4.21267e-61	PF02458(Transferase family)	AT5G42830	HXXXD-type acyl-transferase family protein
Medtr0005s0150	8.35781	1.24586	6.70849	1.96646e-11	7.85005e-11	PF00150(Cellulase (glycosyl hydrolase family 5))	AT5G66460	Glycosyl hydrolase superfamily protein
Medtr4g097400	8.34952	1.28933	6.47587	9.42676e-11	3.60834e-10
Medtr2g029560	8.33861	0.651821	12.7928	1.79885e-37	2.19313e-36	PF00141(Peroxidase)	AT5G06730	Peroxidase superfamily protein
Medtr3g083760	8.33838	0.689985	12.0849	1.26973e-33	1.35503e-32	PF00234(Protease inhibitor/seed storage/LTP family)	AT1G55260	Bifunctional inhibitor/lipid-transfer protein/seed storage 2S albumin superfamily protein
Medtr2g079320	8.32794	1.22702	6.78712	1.14396e-11	4.63596e-11	PF00097(Zinc finger, C3HC4 type (RING finger))	AT1G53010	RING/U-box superfamily protein
Medtr4g099010	8.2973	0.520632	15.937	3.50899e-57	7.95131e-56	PF04043(Plant invertase/pectin methylesterase inhibitor)	AT5G46960	Plant invertase/pectin methylesterase inhibitor superfamily protein
Medtr7g077180	8.26294	0.605557	13.6452	2.1565e-42	3.0887e-41	PF00228(Bowman-Birk serine protease inhibitor family)
Medtr1g107390	8.25963	1.45467	5.67802	1.36265e-08	4.52014e-08
Medtr6g027740	8.24183	0.920661	8.95208	3.48849e-19	2.06404e-18
Medtr8g089340	8.23758	1.93164	4.26455	2.00306e-05	5.17189e-05	PF00324(Amino acid permease)	AT4G21120	amino acid transporter 1
Medtr1g015020	8.23303	0.673027	12.2328	2.07594e-34	2.2795e-33	PF07714(Protein tyrosine kinase)	AT2G05940	Protein kinase superfamily protein
Medtr8g015220	8.19558	0.527274	15.5433	1.76623e-54	3.67861e-53	PF05153(Myo-inositol oxygenase)	AT1G14520	myo-inositol oxygenase 1
Medtr1g027290	8.19314	1.24197	6.5969	4.19849e-11	1.64484e-10	PF03171(2OG-Fe(II) oxygenase superfamily)	AT2G36690	2-oxoglutarate (2OG) and Fe(II)-dependent oxygenase superfamily protein
Medtr6g082500	8.18095	1.32791	6.16075	7.24028e-10	2.61721e-09	PF07224(Chlorophyllase)	AT1G19670	chlorophyllase 1
Medtr3g052900	8.16526	1.25941	6.48338	8.96897e-11	3.44087e-10
Medtr8g090095	8.1018	0.584473	13.8617	1.0807e-43	1.62111e-42	PF00201(UDP-glucoronosyl and UDP-glucosyl transferase)	AT2G15490	UDP-glycosyltransferase 73B4
Medtr2g031600	8.10162	0.511225	15.8475	1.46401e-56	3.27624e-55	PF08031(Berberine and berberine like ), PF01565(FAD binding domain )	AT5G44400	FAD-binding Berberine family protein
Medtr1g023530	8.09466	1.42564	5.67791	1.3635e-08	4.52244e-08		AT1G80630	RNI-like superfamily protein
Medtr4g016720	8.09038	0.957232	8.45186	2.86706e-17	1.55691e-16	PF01699(Sodium/calcium exchanger protein)	AT2G38170	cation exchanger 1
Medtr8g067275	8.06663	1.27787	6.31255	2.74478e-10	1.01795e-09	PF01293(Phosphoenolpyruvate carboxykinase)	AT4G37870	phosphoenolpyruvate carboxykinase 1
Medtr5g019120	8.0536	0.299891	26.8551	7.36252e-159	1.3881e-156	PF04193(PQ loop repeat )	AT4G36850	PQ-loop repeat family protein / transmembrane family protein
Medtr6g027730	8.04979	0.619742	12.9889	1.41374e-38	1.77539e-37	PF07847(Protein of unknown function (DUF1637))	AT5G39890	Protein of unknown function (DUF1637)
Medtr6g028100	8.0048	0.564178	14.1884	1.08033e-45	1.73225e-44	PF00933(Glycosyl hydrolase family 3 N terminal domain), PF01915(Glycosyl hydrolase family 3 C-terminal domain)	AT5G04885	Glycosyl hydrolase family protein
Medtr2g073220	8.00176	1.44924	5.52134	3.36432e-08	1.0853e-07
Medtr2g087900	7.98429	1.1903	6.7078	1.97585e-11	7.88612e-11	PF03552(Cellulose synthase)	AT2G32530	cellulose synthase-like B3
Medtr5g098170	7.96577	1.22703	6.49188	8.47693e-11	3.2573e-10	PF00891(O-methyltransferase), PF08100(Dimerisation domain)	AT5G54160	O-methyltransferase 1
Medtr4g019225	7.95013	0.609131	13.0516	6.22233e-39	7.91399e-38	PF07732(Multicopper oxidase), PF00394(Multicopper oxidase), PF07731(Multicopper oxidase)	AT3G09220	laccase 7
Medtr3g118160	7.94867	1.22114	6.50923	7.55357e-11	2.9118e-10	PF10424()	AT5G27740	ATPase family associated with various cellular activities (AAA)
Medtr1g007830	7.92484	1.29883	6.10151	1.05069e-09	3.75893e-09		AT4G27790	Calcium-binding EF hand family protein
Medtr2g024010	7.89038	0.913681	8.63582	5.83092e-18	3.26536e-17	PF04885(Stigma-specific protein, Stig1)	AT1G11925	Stigma-specific Stig1 family protein
Medtr5g033520	7.88114	1.27609	6.17603	6.57356e-10	2.38337e-09	PF04864(Allinase)	AT1G70560	tryptophan aminotransferase of Arabidopsis 1
Medtr2g023100	7.86101	1.04238	7.54141	4.64926e-14	2.14958e-13	PF00249(Myb-like DNA-binding domain)	AT2G46410	Homeodomain-like superfamily protein
Medtr4g118590	7.85542	0.62569	12.5548	3.74116e-36	4.3656e-35	PF01156(Inosine-uridine preferring nucleoside hydrolase)	AT5G18860	inosine-uridine preferring nucleoside hydrolase family protein
Medtr8g077290	7.84967	0.658995	11.9116	1.03023e-32	1.06555e-31	PF00561(alpha/beta hydrolase fold)	AT2G18360	alpha/beta-Hydrolases superfamily protein
Medtr4g129650	7.82772	0.396017	19.7661	5.82895e-87	2.92421e-85	PF00892(EamA-like transporter family)	AT4G30420	nodulin MtN21 /EamA-like transporter family protein
Medtr2g101660	7.81725	1.03962	7.51936	5.50449e-14	2.53201e-13	PF04749(PLAC8 family)	AT1G52200	PLAC8 family protein
Medtr1g110550	7.81204	0.391351	19.9617	1.18518e-88	6.25002e-87		AT1G25400
Medtr4g123040	7.76795	0.947133	8.20154	2.37328e-16	1.22864e-15	PF00249(Myb-like DNA-binding domain)	AT5G49620	myb domain protein 78
Medtr5g010730	7.76692	1.06504	7.29262	3.03983e-13	1.34139e-12	PF07714(Protein tyrosine kinase), PF00989(PAS fold)	AT4G23050	PAS domain-containing protein tyrosine kinase family protein
Medtr1g115210	7.7593	1.30366	5.95192	2.65012e-09	9.23142e-09	PF00026(Eukaryotic aspartyl protease)	AT3G20015	Eukaryotic aspartyl protease family protein
Medtr4g011020	7.74743	0.447501	17.3126	3.777e-67	1.12437e-65	PF00903(Glyoxalase/Bleomycin resistance protein/Dioxygenase superfamily)	AT1G80160	Lactoylglutathione lyase / glyoxalase I family protein
Medtr7g112620	7.74261	0.57863	13.3809	7.8173e-41	1.06217e-39	PF00561(alpha/beta hydrolase fold)	AT3G05600	alpha/beta-Hydrolases superfamily protein
Medtr8g447340	7.74027	1.24958	6.19432	5.85378e-10	2.12963e-09	PF00083(Sugar (and other) transporter)	AT1G16390	organic cation/carnitine transporter 3
Medtr2g047968	7.72605	0.976541	7.91165	2.54006e-15	1.25163e-14	PF01733(Nucleoside transporter)	AT4G05120	Major facilitator superfamily protein
MT4Noble_004459	7.72483	1.31799	5.86109	4.59844e-09	1.57706e-08
Medtr3g058720	7.70496	1.25189	6.15468	7.5228e-10	2.71389e-09	PF07725(Leucine Rich Repeat), PF01582(TIR domain), PF00931(NB-ARC domain)	AT5G17680	disease resistance protein (TIR-NBS-LRR class), putative
Medtr6g069140	7.68609	0.999126	7.69282	1.43932e-14	6.84789e-14	PF02065(Melibiase)	AT5G08370	alpha-galactosidase 2
Medtr7g098750	7.6726	0.680456	11.2757	1.73043e-29	1.56624e-28	PF01061(ABC-2 type transporter), PF08370(Plant PDR ABC transporter associated), PF00005(ABC transporter)	AT1G15520	pleiotropic drug resistance 12
Medtr2g008580	7.66343	1.40009	5.47354	4.41136e-08	1.4131e-07	PF00234(Protease inhibitor/seed storage/LTP family)	AT5G64080	Bifunctional inhibitor/lipid-transfer protein/seed storage 2S albumin superfamily protein
Medtr4g011230	7.65253	0.608572	12.5746	2.91385e-36	3.41817e-35		AT1G52690	Late embryogenesis abundant protein (LEA) family protein
Medtr4g122930	7.63214	1.2689	6.01478	1.80136e-09	6.33915e-09	PF04398(Protein of unknown function, DUF538)	AT5G49600	Protein of unknown function, DUF538
Medtr3g028540	7.62433	1.29218	5.90034	3.62752e-09	1.25332e-08
Medtr8g093620	7.60402	0.853948	8.90456	5.36006e-19	3.14452e-18		AT4G33467
Medtr4g127670	7.60089	1.32042	5.75642	8.59159e-09	2.88917e-08	PF00141(Peroxidase)	AT2G18980	Peroxidase superfamily protein
Medtr5g005920	7.58749	1.0578	7.17291	7.34195e-13	3.17901e-12	PF07859(alpha/beta hydrolase fold)	AT1G47480	alpha/beta-Hydrolases superfamily protein
Medtr4g032865	7.58454	0.553868	13.6938	1.10615e-42	1.60101e-41	PF02428(Potato type II proteinase inhibitor family)	AT1G72060	serine-type endopeptidase inhibitors
Medtr6g007767	7.57848	0.645753	11.7359	8.34486e-32	8.31201e-31	PF03098(Animal haem peroxidase)	AT3G01420	Peroxidase superfamily protein
Medtr7g077190	7.57417	1.57837	4.79872	1.5968e-06	4.53581e-06	PF00228(Bowman-Birk serine protease inhibitor family)
Medtr4g088760	7.56401	0.569099	13.2912	2.60388e-40	3.47417e-39	PF04720(PDDEXK-like family of unknown function)	AT4G32480	Protein of unknown function (DUF506)
Medtr5g040940	7.56032	1.16185	6.50713	7.66003e-11	2.95087e-10	PF00445(Ribonuclease T2 family)	AT2G02990	ribonuclease 1
Medtr1g023570	7.54885	0.783101	9.63969	5.43493e-22	3.63749e-21	PF09118(Domain of unknown function (DUF1929)), PF07250(Glyoxal oxidase N-terminus)	AT1G75620	glyoxal oxidase-related protein
Medtr1g021730	7.53156	1.00211	7.51571	5.66033e-14	2.60162e-13	PF03372(Endonuclease/Exonuclease/phosphatase family)	AT1G47510	inositol polyphosphate 5-phosphatase 11
Medtr1g089000	7.53057	1.25826	5.98493	2.1649e-09	7.58239e-09		AT3G62990
Medtr3g072560	7.52723	0.739194	10.183	2.36089e-24	1.74085e-23	PF00892(EamA-like transporter family)	AT4G08290	nodulin MtN21 /EamA-like transporter family protein
Medtr5g035580	7.52368	0.697238	10.7907	3.80898e-27	3.13925e-26	PF00201(UDP-glucoronosyl and UDP-glucosyl transferase)	AT1G24100	UDP-glucosyl transferase 74B1
Medtr1g075340	7.50935	0.666088	11.2738	1.76758e-29	1.59886e-28	PF00280(Potato inhibitor I family)	AT2G38870	Serine protease inhibitor, potato inhibitor I-type family protein
Medtr1g081420	7.50878	0.556914	13.4828	1.97422e-41	2.72872e-40	PF00383(Cytidine and deoxycytidylate deaminase zinc-binding region)	AT5G28050	Cytidine/deoxycytidylate deaminase family protein
Medtr5g075650	7.49818	0.35625	21.0476	2.40809e-98	1.57872e-96	PF00560(Leucine Rich Repeat), PF00069(Protein kinase domain)	AT1G06840	Leucine-rich repeat protein kinase family protein
Medtr7g111320	7.47653	1.24964	5.98293	2.19156e-09	7.67391e-09	PF00010(Helix-loop-helix DNA-binding domain)	AT1G09530	phytochrome interacting factor 3
Medtr2g022490	7.45748	0.520138	14.3375	1.27539e-46	2.11315e-45		AT1G03220	Eukaryotic aspartyl protease family protein
Medtr3g073150	7.45233	1.95406	3.81377	0.000136862	0.000323865	PF00174(Oxidoreductase molybdopterin binding domain), PF00173(Cytochrome b5-like Heme/Steroid binding domain), PF03404(Mo-co oxidoreductase dimerisation domain), PF00175(Oxidoreductase NAD-binding domain ), PF00970(Oxidoreductase FAD-binding domain)	AT1G77760	nitrate reductase 1
Medtr5g041010	7.44119	0.701953	10.6007	2.9577e-26	2.35035e-25	PF00445(Ribonuclease T2 family)	AT1G14220	Ribonuclease T2 family protein
Medtr5g030910	7.42183	1.324	5.60562	2.07514e-08	6.79679e-08	PF01061(ABC-2 type transporter), PF00005(ABC transporter)	AT3G55100	ABC-2 type transporter family protein
Medtr5g073200	7.38855	2.02828	3.64277	0.00026972	0.000616266	PF03936(Terpene synthase family, metal binding domain), PF01397(Terpene synthase, N-terminal domain)	AT5G23960	terpene synthase 21
Medtr1g070020	7.38612	1.131	6.53059	6.5509e-11	2.53511e-10	PF00847(AP2 domain)	AT3G23240	ethylene response factor 1
Medtr5g016320	7.37877	0.508306	14.5164	9.54153e-48	1.63344e-46	PF03321(GH3 auxin-responsive promoter)	AT2G14960	Auxin-responsive GH3 family protein
Medtr5g045710	7.36061	1.10997	6.63133	3.32668e-11	1.31077e-10	PF00107(Zinc-binding dehydrogenase), PF08240(Alcohol dehydrogenase GroES-like domain)	AT4G22110	GroES-like zinc-binding dehydrogenase family protein
Medtr4g088955	7.35803	1.2578	5.8499	4.91855e-09	1.68304e-08	PF12481(Aluminium induced protein ), PF12504()	AT4G27450	Aluminium induced protein with YGL and LRDR motifs
Medtr5g088767	7.35556	1.26234	5.82695	5.64508e-09	1.92321e-08
Medtr1g018610	7.35437	0.459483	16.0058	1.16491e-57	2.67752e-56		AT4G24220	NAD(P)-binding Rossmann-fold superfamily protein
Medtr7g110810	7.33369	0.556515	13.1779	1.1765e-39	1.53355e-38	PF00010(Helix-loop-helix DNA-binding domain)	AT1G09530	phytochrome interacting factor 3
Medtr1g084220	7.33084	1.33938	5.4733	4.41739e-08	1.41488e-07
Medtr4g011250	7.3296	0.668657	10.9617	5.84118e-28	4.96011e-27		AT1G52690	Late embryogenesis abundant protein (LEA) family protein
Medtr7g026993	7.32614	1.45609	5.03139	4.86941e-07	1.44792e-06
Medtr2g043710	7.32564	0.433847	16.8853	5.77267e-64	1.57093e-62		AT5G20790
Medtr1g059630	7.27845	0.635454	11.4539	2.24709e-30	2.10044e-29
Medtr2g072910	7.27353	1.02428	7.1011	1.23766e-12	5.29696e-12	PF03171(2OG-Fe(II) oxygenase superfamily)	AT1G17020	senescence-related gene 1
Medtr7g009820	7.24825	0.542165	13.3691	9.16621e-41	1.24194e-39	PF01011(PQQ enzyme repeat), PF10527()
Medtr2g103490	7.24471	0.440633	16.4416	9.63901e-61	2.43474e-59	PF00903(Glyoxalase/Bleomycin resistance protein/Dioxygenase superfamily)	AT1G80160	Lactoylglutathione lyase / glyoxalase I family protein
Medtr4g118800	7.22998	0.530611	13.6258	2.81468e-42	4.01346e-41	PF04535(Domain of unknown function (DUF588))	AT4G15610	Uncharacterised protein family (UPF0497)
Medtr8g087810	7.2268	1.32321	5.46157	4.71933e-08	1.50958e-07	PF00854(POT family)	AT1G59740	Major facilitator superfamily protein
Medtr8g058350	7.22293	0.84594	8.53834	1.36159e-17	7.50551e-17		AT1G78780	pathogenesis-related family protein
Medtr1g113970	7.21851	1.28397	5.62204	1.88716e-08	6.1994e-08
Medtr6g016650	7.21794	0.572804	12.6011	2.08304e-36	2.45355e-35	PF01619(Proline dehydrogenase)	AT3G30775	Methylenetetrahydrofolate reductase family protein
Medtr3g080330	7.19381	1.24279	5.78844	7.10452e-09	2.40621e-08	PF00560(Leucine Rich Repeat), PF00646(F-box domain)	AT4G05460	RNI-like superfamily protein
Medtr7g109350	7.1908	1.13137	6.35585	2.07274e-10	7.75892e-10	PF01764(Lipase (class 3))	AT1G02660	alpha/beta-Hydrolases superfamily protein
Medtr2g089450	7.17937	1.42747	5.02945	4.91894e-07	1.4625e-06	PF00249(Myb-like DNA-binding domain)	AT4G21440	MYB-like 102
Medtr1g022315	7.15476	0.269374	26.5607	1.93239e-155	3.46221e-153	PF00083(Sugar (and other) transporter)	AT1G75220	Major facilitator superfamily protein
Medtr4g094550	7.14882	0.558814	12.7928	1.79786e-37	2.19285e-36	PF07712(Stress up-regulated Nod 19)	AT5G61820
Medtr8g028430	7.14357	0.362004	19.7334	1.11426e-86	5.56087e-85	PF00150(Cellulase (glycosyl hydrolase family 5))	AT1G13130	Cellulase (glycosyl hydrolase family 5) protein
Medtr1g066430	7.11291	1.24858	5.69682	1.2206e-08	4.05731e-08	PF00097(Zinc finger, C3HC4 type (RING finger))	AT2G37150	RING/U-box superfamily protein
Medtr5g071170	7.10697	0.792905	8.9632	3.15387e-19	1.87195e-18	PF00487(Fatty acid desaturase), PF11960(Domain of unknown function (DUF3474))	AT3G11170	fatty acid desaturase 7
Medtr5g018250	7.05288	1.2372	5.70069	1.19324e-08	3.96866e-08	PF02453(Reticulon)	AT2G23640	Reticulan like protein B13
Medtr3g090940	7.04593	1.12837	6.24436	4.2555e-10	1.56116e-09	PF03083(Sugar efflux transporter for intercellular exchange)	AT5G53190	Nodulin MtN3 family protein
Medtr1g102510	7.03831	1.26548	5.56177	2.67055e-08	8.68682e-08		AT5G51680	hydroxyproline-rich glycoprotein family protein
Medtr6g042610	7.01079	1.29622	5.40863	6.35086e-08	2.01514e-07	PF00067(Cytochrome P450)	AT4G31970	cytochrome P450, family 82, subfamily C, polypeptide 2
MT4Noble_035956	6.9824	1.25205	5.57679	2.44995e-08	7.98815e-08
Medtr2g076590	6.98155	1.14406	6.10245	1.04453e-09	3.73734e-09	PF08276(PAN-like domain), PF01453(D-mannose binding lectin)	AT1G78860	D-mannose binding lectin protein with Apple-like carbohydrate-binding domain
Medtr3g085030	6.96128	1.64787	4.22442	2.39557e-05	6.13318e-05	PF11820(Protein of unknown function (DUF3339))	AT5G08391	Protein of unknown function (DUF 3339)
Medtr8g096910	6.95909	0.372944	18.6599	1.04956e-77	4.18173e-76	PF00314(Thaumatin family)	AT4G11650	osmotin 34
Medtr4g094555	6.95668	1.0972	6.34039	2.29189e-10	8.55594e-10	PF07712(Stress up-regulated Nod 19)	AT5G61820
Medtr1g019240	6.94816	1.33861	5.1906	2.09621e-07	6.40474e-07	PF00010(Helix-loop-helix DNA-binding domain)	AT4G36930	basic helix-loop-helix (bHLH) DNA-binding superfamily protein
Medtr1g077260	6.94615	1.4947	4.64718	3.36507e-06	9.29688e-06
Medtr4g132010	6.94434	1.51743	4.57638	4.73087e-06	1.29071e-05		AT3G20340
Medtr5g024940	6.9392	1.75772	3.94784	7.88607e-05	0.000191789	PF03171(2OG-Fe(II) oxygenase superfamily)	AT1G14130	2-oxoglutarate (2OG) and Fe(II)-dependent oxygenase superfamily protein
Medtr5g019350	6.93698	0.448087	15.4813	4.63723e-54	9.50714e-53	PF04678(Mitochondrial calcium uniporter)	AT2G23790	Protein of unknown function (DUF607)
Medtr5g090280	6.9058	0.905072	7.63011	2.34552e-14	1.10176e-13	PF01554(MatE)	AT3G59030	MATE efflux family protein
Medtr6g082420	6.90456	0.77971	8.85529	8.34659e-19	4.85219e-18	PF00561(alpha/beta hydrolase fold)	AT1G15060	Uncharacterised conserved protein UCP031088, alpha/beta hydrolase
Medtr1g073770	6.90075	0.8219	8.3961	4.61558e-17	2.4775e-16		AT1G06137
Medtr1g028890	6.89022	0.640967	10.7497	5.94336e-27	4.86085e-26	PF07714(Protein tyrosine kinase), PF08263(Leucine rich repeat N-terminal domain)	AT4G23740	Leucine-rich repeat protein kinase family protein
Medtr7g053200	6.88903	0.626998	10.9873	4.39826e-28	3.75695e-27	PF00069(Protein kinase domain)	AT3G25250	AGC (cAMP-dependent, cGMP-dependent and protein kinase C) kinase family protein
Medtr7g068430	6.88652	0.499616	13.7836	3.1981e-43	4.71396e-42
Medtr7g024520	6.88157	1.3333	5.16131	2.45226e-07	7.45787e-07	PF08100(Dimerisation domain), PF00891(O-methyltransferase)	AT4G35160	O-methyltransferase family protein
Medtr4g118355	6.88068	0.315701	21.7949	2.59158e-105	1.95187e-103	PF02896(PEP-utilising enzyme, TIM barrel domain)	AT4G15530	pyruvate orthophosphate dikinase
Medtr4g478180	6.87976	1.28143	5.36882	7.92531e-08	2.49742e-07	PF00249(Myb-like DNA-binding domain)	AT5G16770	myb domain protein 9
Medtr1g107405	6.87323	1.55505	4.41993	9.87312e-06	2.61837e-05
Medtr3g096400	6.86767	1.06811	6.42976	1.27803e-10	4.84316e-10	PF02365(No apical meristem (NAM) protein)	AT5G64530	xylem NAC domain 1
Medtr7g057390	6.84207	1.70237	4.01915	5.84074e-05	0.000143965	PF03936(Terpene synthase family, metal binding domain)	AT5G23960	terpene synthase 21
Medtr8g061360	6.81703	0.300194	22.7087	3.67204e-114	3.23926e-112	PF00155(Aminotransferase class I and II)	AT5G53970	Tyrosine transaminase family protein
Medtr7g100335	6.80896	0.493697	13.7918	2.85618e-43	4.22293e-42	PF09713(Plant protein 1589 of unknown function (A_thal_3526))	AT5G02580	Plant protein 1589 of unknown function
Medtr2g035120	6.79139	1.13005	6.00979	1.8576e-09	6.52988e-09	PF00407(Pathogenesis-related protein Bet v I family)	AT1G24020	MLP-like protein 423
Medtr7g102890	6.7859	1.53212	4.42911	9.46242e-06	2.51269e-05		AT1G33710	RNA-directed DNA polymerase (reverse transcriptase)-related family protein
Medtr3g081640	6.78438	1.22688	5.52979	3.20622e-08	1.03557e-07	PF02535(ZIP Zinc transporter)	AT3G12750	zinc transporter 1 precursor
Medtr5g062900	6.77623	1.16075	5.83781	5.28908e-09	1.80576e-08		AT5G22810	GDSL-like Lipase/Acylhydrolase superfamily protein
Medtr4g084480	6.77095	0.912568	7.41966	1.17423e-13	5.31155e-13	PF00332(Glycosyl hydrolases family 17)	AT4G18340	Glycosyl hydrolase superfamily protein
Medtr7g102500	6.76944	1.40046	4.83373	1.33998e-06	3.83311e-06		AT2G36710	Pectin lyase-like superfamily protein
Medtr4g066240	6.76732	0.585732	11.5536	7.07752e-31	6.76468e-30	PF00232(Glycosyl hydrolase family 1)	AT2G44480	beta glucosidase 17
Medtr4g128400	6.73952	1.41583	4.76011	1.93484e-06	5.46003e-06	PF06955(Xyloglucan endo-transglycosylase (XET) C-terminus), PF00722(Glycosyl hydrolases family 16)	AT4G25810	xyloglucan endotransglycosylase 6
Medtr2g089620	6.73842	1.38047	4.88126	1.05409e-06	3.04612e-06	PF00249(Myb-like DNA-binding domain)	AT4G21440	MYB-like 102
Medtr1g492630	6.73701	0.246929	27.2831	6.72697e-164	1.36652e-161		AT3G52230
Medtr8g089825	6.73258	0.649592	10.3643	3.6028e-25	2.74429e-24
Medtr3g436390	6.72831	1.81621	3.70458	0.000211738	0.000489877	PF00067(Cytochrome P450)	AT5G07990	Cytochrome P450 superfamily protein
Medtr4g026080	6.72818	1.14968	5.85222	4.8504e-09	1.66079e-08	PF00067(Cytochrome P450)	AT3G26330	cytochrome P450, family 71, subfamily B, polypeptide 37
Medtr7g010760	6.72794	0.552991	12.1665	4.68995e-34	5.07131e-33
Medtr4g124750	6.71995	1.28221	5.24092	1.5978e-07	4.92258e-07	PF02519(Auxin responsive protein)	AT5G20810	SAUR-like auxin-responsive protein family
Medtr4g095500	6.71977	1.07282	6.26367	3.76015e-10	1.38437e-09	PF03514(GRAS domain family)	AT3G49950	GRAS family transcription factor
Medtr2g072400	6.71285	0.354837	18.9181	8.08926e-80	3.43151e-78	PF00067(Cytochrome P450)	AT3G14690	cytochrome P450, family 72, subfamily A, polypeptide 15
Medtr7g057340	6.69796	1.40731	4.7594	1.9417e-06	5.47724e-06	PF03936(Terpene synthase family, metal binding domain)	AT5G23960	terpene synthase 21
Medtr7g110830	6.69765	0.448969	14.9178	2.52352e-50	4.65135e-49	PF00249(Myb-like DNA-binding domain)	AT4G01680	myb domain protein 55
Medtr8g073960	6.68227	1.27469	5.24228	1.58602e-07	4.88787e-07	PF00067(Cytochrome P450)	AT5G05260	cytochrome p450 79a2
Medtr5g040960	6.68017	0.415532	16.0762	3.74693e-58	8.74465e-57	PF00445(Ribonuclease T2 family)	AT2G02990	ribonuclease 1
Medtr2g083920	6.67894	0.289425	23.0766	7.96054e-118	7.50424e-116	PF00226(DnaJ domain)	AT2G42750	DNAJ heat shock N-terminal domain-containing protein
Medtr1g028290	6.66338	0.924972	7.20387	5.85252e-13	2.54556e-12	PF07714(Protein tyrosine kinase)	AT5G38280	PR5-like receptor kinase
Medtr2g024050	6.65826	1.03353	6.44228	1.17693e-10	4.47591e-10	PF04885(Stigma-specific protein, Stig1)	AT1G11925	Stigma-specific Stig1 family protein
Medtr1g088620	6.65096	0.702426	9.46856	2.83732e-21	1.84212e-20	PF00582(Universal stress protein family), PF04434(SWIM zinc finger)	AT2G47710	Adenine nucleotide alpha hydrolases-like superfamily protein
Medtr8g012620	6.64806	0.678802	9.79381	1.19695e-22	8.2149e-22	PF07897(Ethylene-responsive binding factor-associated repression)	AT3G29575	ABI five binding protein 3
Medtr8g432440	6.63816	0.532705	12.4612	1.21472e-35	1.39102e-34		AT2G45760	BON association protein 2
Medtr6g016640	6.63324	0.57457	11.5447	7.85009e-31	7.48822e-30	PF01619(Proline dehydrogenase)	AT3G30775	Methylenetetrahydrofolate reductase family protein
Medtr4g124460	6.63167	1.26367	5.24795	1.53803e-07	4.74857e-07	PF08263(Leucine rich repeat N-terminal domain)	AT3G20820	Leucine-rich repeat (LRR) family protein
Medtr2g435490	6.61665	0.430008	15.3873	1.99272e-53	3.99459e-52	PF00188(Cysteine-rich secretory protein family)	AT2G14610	pathogenesis-related gene 1
Medtr7g116260	6.61647	1.30593	5.06647	4.05264e-07	1.21281e-06
Medtr6g016635	6.60725	0.53291	12.3984	2.66457e-35	3.01302e-34	PF01619(Proline dehydrogenase)	AT3G30775	Methylenetetrahydrofolate reductase family protein
Medtr3g094690	6.60552	0.80021	8.25473	1.52242e-16	7.95721e-16	PF03195(Protein of unknown function DUF260), PF05308(Mitochondrial fission regulator)	AT2G40470	LOB domain-containing protein 15
Medtr2g018175	6.60315	0.478658	13.7951	2.72631e-43	4.03298e-42	PF04520(Senescence regulator)	AT1G29640	Protein of unknown function, DUF584
Medtr4g025690	6.60074	0.934942	7.06005	1.66447e-12	7.07326e-12	PF01095(Pectinesterase), PF04043(Plant invertase/pectin methylesterase inhibitor)	AT2G45220	Plant invertase/pectin methylesterase inhibitor superfamily
Medtr5g088770	6.59428	0.50353	13.0961	3.46635e-39	4.43816e-38	PF00031(Cystatin domain)	AT3G12490	cystatin B
Medtr3g092490	6.58829	1.44882	4.54735	5.43265e-06	1.47395e-05	PF00076(RNA recognition motif. (a.k.a. RRM, RBD, or RNP domain))	AT2G46780	RNA-binding (RRM/RBD/RNP motifs) family protein
Medtr6g012830	6.58306	0.421701	15.6107	6.15357e-55	1.30041e-53	PF09366(Protein of unknown function (DUF1997))	AT5G39530	Protein of unknown function (DUF1997)
Medtr3g013500	6.58012	0.672252	9.78817	1.2657e-22	8.68258e-22	PF00685(Sulfotransferase domain)	AT5G07010	sulfotransferase 2A
Medtr2g043730	6.57873	1.39621	4.71184	2.45488e-06	6.85845e-06	PF02298(Plastocyanin-like domain)	AT2G02850	plantacyanin
Medtr4g029170	6.56997	1.56973	4.18541	2.84647e-05	7.2273e-05	PF00141(Peroxidase)	AT5G05340	Peroxidase superfamily protein
Medtr1g098460	6.54831	0.457144	14.3244	1.54053e-46	2.54807e-45	PF00847(AP2 domain)	AT5G61890	Integrase-type DNA-binding superfamily protein
Medtr4g133230	6.5481	0.38777	16.8866	5.64853e-64	1.5386e-62	PF00939(Sodium:sulfate symporter transmembrane region)	AT5G47560	tonoplast dicarboxylate transporter
Medtr5g009370	6.54099	0.767814	8.51897	1.60982e-17	8.85018e-17	PF00481(Protein phosphatase 2C)	AT1G07430	highly ABA-induced PP2C gene 2
Medtr7g104330	6.53796	0.32961	19.8354	1.47198e-87	7.48866e-86	PF00149(Calcineurin-like phosphoesterase)	AT3G52820	purple acid phosphatase 22
Medtr1g054360	6.53632	1.72158	3.7967	0.000146636	0.00034586
MT4Noble_046690	6.53047	0.647349	10.088	6.24144e-24	4.51229e-23
Medtr2g075940	6.52632	1.02509	6.3666	1.93264e-10	7.24484e-10
Medtr6g042660	6.51364	1.13756	5.72599	1.02834e-08	3.43846e-08	PF01095(Pectinesterase)	AT3G24130	Pectin lyase-like superfamily protein
Medtr3g071470	6.51256	1.30718	4.98216	6.28779e-07	1.85287e-06	PF01190(Pollen proteins Ole e I like)	AT5G05500	Pollen Ole e 1 allergen and extensin family protein
Medtr7g010820	6.50928	1.17522	5.53877	3.04601e-08	9.8603e-08	PF00854(POT family)	AT1G32450	nitrate transporter 1.5
Medtr4g114080	6.48506	0.379024	17.1099	1.25279e-65	3.57448e-64	PF00903(Glyoxalase/Bleomycin resistance protein/Dioxygenase superfamily)	AT1G80160	Lactoylglutathione lyase / glyoxalase I family protein
Medtr3g103570	6.4819	0.669232	9.68558	3.47241e-22	2.34634e-21	PF00249(Myb-like DNA-binding domain)	AT3G49690	myb domain protein 84
Medtr1g077890	6.47294	0.280778	23.0536	1.35401e-117	1.26811e-115	PF01053(Cys/Met metabolism PLP-dependent enzyme)	AT1G64660	methionine gamma-lyase
Medtr3g075390	6.46996	0.371707	17.4061	7.41841e-68	2.25254e-66	PF08246(Cathepsin propeptide inhibitor domain (I29)), PF00112(Papain family cysteine protease)	AT5G50260	Cysteine proteinases superfamily protein
Medtr3g464580	6.4699	0.505612	12.7962	1.72257e-37	2.10369e-36	PF00733(Asparagine synthase)	AT3G47340	glutamine-dependent asparagine synthase 1
Medtr4g081530	6.46945	0.438592	14.7505	3.05413e-49	5.4517e-48	PF00232(Glycosyl hydrolase family 1)	AT5G54570	beta glucosidase 41
Medtr1g070015	6.46856	1.39385	4.64078	3.47099e-06	9.57486e-06	PF00847(AP2 domain)	AT3G23240	ethylene response factor 1
Medtr3g077040	6.44634	1.25971	5.11732	3.09902e-07	9.36557e-07		AT5G56660	IAA-leucine resistant (ILR)-like 2
Medtr6g024050	6.44201	2.28593	2.81811	0.00483069	0.00933017	PF04043(Plant invertase/pectin methylesterase inhibitor)	AT3G17220	pectin methylesterase inhibitor 2
Medtr8g432420	6.43283	0.453595	14.1819	1.18595e-45	1.8974e-44		AT2G45760	BON association protein 2
Medtr5g030620	6.42901	0.142772	45.03	0	0	PF01293(Phosphoenolpyruvate carboxykinase)	AT4G37870	phosphoenolpyruvate carboxykinase 1
Medtr5g430730	6.42148	0.135591	47.3593	0	0	PF01293(Phosphoenolpyruvate carboxykinase)	AT4G37870	phosphoenolpyruvate carboxykinase 1
Medtr5g017680	6.41424	1.83658	3.4925	0.000478519	0.00106082	PF01734(Patatin-like phospholipase)	AT4G37070	Acyl transferase/acyl hydrolase/lysophospholipase superfamily protein
Medtr5g083500	6.4073	0.640013	10.0112	1.36084e-23	9.69735e-23		AT2G40390
Medtr1g060360	6.40139	0.889265	7.19852	6.08701e-13	2.64436e-12	PF00149(Calcineurin-like phosphoesterase)	AT3G52820	purple acid phosphatase 22
Medtr2g066760	6.37963	2.48595	2.56628	0.0102797	0.0188427
Medtr2g078930	6.36996	0.381879	16.6806	1.81439e-62	4.79286e-61	PF01554(MatE)	AT3G23560	MATE efflux family protein
Medtr4g095330	6.36787	1.10604	5.75736	8.5439e-09	2.87415e-08	PF10714(Late embryogenesis abundant protein 18)	AT2G23110	Late embryogenesis abundant protein, group 6
Medtr4g070630	6.36633	0.791735	8.04099	8.91156e-16	4.48001e-15		AT5G66440
Medtr2g087350	6.36026	0.567214	11.2132	3.51434e-29	3.13465e-28	PF04564(U-box domain)	AT2G35930	plant U-box 23
Medtr3g102370	6.35098	0.5145	12.344	5.24918e-35	5.87802e-34	PF01112(Asparaginase)	AT3G16150	N-terminal nucleophile aminohydrolases (Ntn hydrolases) superfamily protein
Medtr5g082750	6.35053	1.43725	4.41852	9.93779e-06	2.63479e-05	PF03171(2OG-Fe(II) oxygenase superfamily)	AT5G05600	2-oxoglutarate (2OG) and Fe(II)-dependent oxygenase superfamily protein
Medtr2g036120	6.34955	2.80605	2.26281	0.0236475	0.0404972	PF00190(Cupin)	AT5G20630	germin 3
Medtr3g069570	6.34772	1.25141	5.07245	3.92736e-07	1.17654e-06		AT2G39855
Medtr2g081980	6.34715	1.02616	6.18535	6.1965e-10	2.25062e-09	PF01397(Terpene synthase, N-terminal domain), PF03936(Terpene synthase family, metal binding domain)	AT5G23960	terpene synthase 21
Medtr5g024660	6.33885	0.942886	6.72282	1.78245e-11	7.13712e-11	PF03547(Membrane transport protein)	AT5G65980	Auxin efflux carrier family protein
Medtr4g094412	6.33874	1.31855	4.80736	1.52933e-06	4.35318e-06	PF03106(WRKY DNA -binding domain)	AT1G68150	WRKY DNA-binding protein 9
Medtr1g067660	6.33328	2.19492	2.88543	0.00390881	0.00767136		AT2G37430	C2H2 and C2HC zinc fingers superfamily protein
Medtr5g038260	6.32601	2.32082	2.72576	0.00641529	0.0121483	PF03478(Protein of unknown function (DUF295))	AT5G53230	Protein of unknown function (DUF295)
Medtr2g033580	6.3253	2.22013	2.84907	0.00438479	0.00853178		AT1G47980
Medtr2g100600	6.29465	0.807135	7.79876	6.25175e-15	3.02733e-14	PF04885(Stigma-specific protein, Stig1)	AT1G11925	Stigma-specific Stig1 family protein
Medtr2g038380	6.28995	0.542334	11.5979	4.22157e-31	4.0646e-30	PF00560(Leucine Rich Repeat)	AT2G19330	plant intracellular ras group-related LRR 6
Medtr6g048440	6.28986	0.305845	20.5655	5.58963e-94	3.30406e-92	PF04116(Fatty acid hydroxylase superfamily)	AT4G25700	beta-hydroxylase 1
Medtr8g024120	6.26972	0.50515	12.4116	2.2609e-35	2.56259e-34	PF03171(2OG-Fe(II) oxygenase superfamily)	AT4G10490	2-oxoglutarate (2OG) and Fe(II)-dependent oxygenase superfamily protein
Medtr2g450680	6.26813	1.10101	5.69309	1.24763e-08	4.14431e-08
Medtr5g015880	6.26311	0.175844	35.6174	7.5483e-278	8.70953e-275	PF03195(Protein of unknown function DUF260)	AT4G37540	LOB domain-containing protein 39
Medtr1g060490	6.22958	0.469835	13.2591	3.99795e-40	5.30229e-39	PF00657(GDSL-like Lipase/Acylhydrolase)	AT5G03610	GDSL-like Lipase/Acylhydrolase superfamily protein
Medtr4g113620	6.21059	0.893016	6.95462	3.53522e-12	1.47729e-11	PF00071(Ras family)	AT5G55190	RAN GTPase 3
Medtr6g042290	6.20991	2.52073	2.46353	0.0137575	0.0246782	PF00004(ATPase family associated with various cellular activities (AAA))	AT5G40010	AAA-ATPase 1
Medtr1157s0010	6.20503	1.12981	5.49211	3.97151e-08	1.27575e-07		AT5G13750	zinc induced facilitator-like 1
Medtr7g072470	6.20104	1.18863	5.21698	1.81862e-07	5.57788e-07		AT3G56220	transcription regulators
Medtr3g069310	6.19203	0.30803	20.102	7.08355e-90	3.81217e-88
Medtr7g427690	6.18638	0.92096	6.71731	1.85104e-11	7.40159e-11	PF01852(START domain)	AT1G73360	homeodomain GLABROUS 11
Medtr1g080250	6.18036	0.254575	24.2771	3.41968e-130	4.11018e-128	PF01212(Beta-eliminating lyase)	AT1G08630	threonine aldolase 1
Medtr8g022160	6.17326	1.66607	3.70527	0.000211163	0.000488588	PF02705(K potassium transporter)	AT4G13420	high affinity K transporter 5
Medtr1g060500	6.17025	2.10615	2.92963	0.00339364	0.00671969	PF00657(GDSL-like Lipase/Acylhydrolase)	AT5G03610	GDSL-like Lipase/Acylhydrolase superfamily protein
Medtr3g058710	6.15431	1.41935	4.33599	1.45103e-05	3.78722e-05		AT5G17880	disease resistance protein (TIR-NBS-LRR class)
Medtr2g076490	6.14515	0.592748	10.3672	3.49537e-25	2.66457e-24	PF01453(D-mannose binding lectin)	AT1G78860	D-mannose binding lectin protein with Apple-like carbohydrate-binding domain
Medtr4g088870	6.1318	1.31395	4.66671	3.06059e-06	8.48494e-06	PF00097(Zinc finger, C3HC4 type (RING finger))	AT4G27470	RING membrane-anchor 3
Medtr7g111450	6.12166	0.365919	16.7295	7.98541e-63	2.13284e-61	PF01679(Proteolipid membrane potential modulator)	AT3G05890	Low temperature and salt responsive protein family
Medtr4g051093	6.11766	1.28546	4.75913	1.94428e-06	5.48397e-06
Medtr4g025730	6.10686	0.29759	20.5211	1.39635e-93	8.15366e-92	PF01095(Pectinesterase), PF04043(Plant invertase/pectin methylesterase inhibitor)	AT2G45220	Plant invertase/pectin methylesterase inhibitor superfamily
Medtr6g023610	6.0939	1.12121	5.43512	5.47583e-08	1.74479e-07	PF00106(short chain dehydrogenase)	AT2G47140	NAD(P)-binding Rossmann-fold superfamily protein
Medtr4g018820	6.09232	1.94336	3.13495	0.00171886	0.00354184	PF03492(SAM dependent carboxyl methyltransferase)	AT1G19640	jasmonic acid carboxyl methyltransferase
Medtr1g087380	6.08804	1.85887	3.27513	0.00105613	0.0022357	PF04091(Exocyst complex subunit Sec15-like )	AT3G56640	exocyst complex component sec15A
Medtr3g467290	6.08298	0.731607	8.31454	9.21083e-17	4.87247e-16	PF00067(Cytochrome P450)	AT4G39950	cytochrome P450, family 79, subfamily B, polypeptide 2
Medtr8g042820	6.07895	0.799032	7.6079	2.78585e-14	1.30244e-13	PF07690(Major Facilitator Superfamily)	AT5G13750	zinc induced facilitator-like 1
Medtr4g089155	6.07361	1.54952	3.91967	8.86696e-05	0.000214631	PF00450(Serine carboxypeptidase)	AT1G11080	serine carboxypeptidase-like 31
Medtr3g088845	6.05793	0.417956	14.4942	1.31895e-47	2.2486e-46	PF00676(Dehydrogenase E1 component)	AT1G21400	Thiamin diphosphate-binding fold (THDP-binding) superfamily protein
Medtr2g038760	6.05722	1.30329	4.64765	3.35732e-06	9.27815e-06	PF00560(Leucine Rich Repeat), PF00931(NB-ARC domain)	AT3G14460	LRR and NB-ARC domains-containing disease resistance protein
Medtr1g106050	6.05438	0.811268	7.46286	8.46661e-14	3.85826e-13	PF00646(F-box domain)
Medtr4g101760	6.05359	0.919492	6.58362	4.59122e-11	1.79431e-10	PF04043(Plant invertase/pectin methylesterase inhibitor)	AT5G62350	Plant invertase/pectin methylesterase inhibitor superfamily protein
Medtr8g072210	6.05282	0.356282	16.9889	9.92908e-65	2.75663e-63	PF00732(GMC oxidoreductase), PF05199(GMC oxidoreductase)	AT4G19380	Long-chain fatty alcohol dehydrogenase family protein
Medtr4g029200	6.04638	1.33769	4.52001	6.1836e-06	1.67109e-05	PF00141(Peroxidase)	AT5G05340	Peroxidase superfamily protein
MT4Noble_022311	6.03554	1.1367	5.30971	1.09798e-07	3.42367e-07
Medtr1g070230	6.00977	1.41139	4.25805	2.06214e-05	5.31539e-05	PF01103(Surface antigen)	AT3G44160	Outer membrane OMP85 family protein
Medtr7g027610	6.00902	0.544482	11.0362	2.55545e-28	2.21099e-27	PF00125(Core histone H2A/H2B/H3/H4)	AT2G38810	histone H2A 8
Medtr1g012335	6.00615	1.29395	4.64172	3.45524e-06	9.53413e-06
Medtr7g081580	6.00341	1.14806	5.22918	1.70262e-07	5.23265e-07	PF05922(Peptidase inhibitor I9), PF00082(Subtilase family), PF02225(PA domain)	AT2G04160	Subtilisin-like serine endopeptidase family protein
Medtr4g066630	6.00178	0.663306	9.04828	1.45237e-19	8.76835e-19	PF00232(Glycosyl hydrolase family 1)	AT5G42260	beta glucosidase 12
Medtr4g020110	6.00141	0.313445	19.1466	1.03267e-81	4.60407e-80	PF00171(Aldehyde dehydrogenase family), PF00696(Amino acid kinase family)	AT3G55610	delta 1-pyrroline-5-carboxylate synthase 2
Medtr2g012290	5.99133	1.42844	4.19431	2.73704e-05	6.96048e-05
Medtr8g022340	5.97754	0.938078	6.37212	1.86435e-10	6.99975e-10	PF02519(Auxin responsive protein)	AT1G19840	SAUR-like auxin-responsive protein family
Medtr3g105730	5.97539	0.326592	18.2962	8.8784e-75	3.30034e-73	PF00481(Protein phosphatase 2C)	AT4G31750	HOPW1-1-interacting 2
Medtr2g072560	5.9724	0.914483	6.53091	6.53733e-11	2.5302e-10	PF00190(Cupin)	AT5G20630	germin 3
Medtr3g118380	5.96427	1.36935	4.35554	1.32736e-05	3.4783e-05
Medtr8g036105	5.96389	1.29894	4.59137	4.40348e-06	1.20469e-05	PF03195(Protein of unknown function DUF260)	AT4G00210	LOB domain-containing protein 31
Medtr7g085630	5.96359	0.20708	28.7984	2.24328e-182	6.28248e-180	PF00208(Glutamate/Leucine/Phenylalanine/Valine dehydrogenase), PF02812(Glu/Leu/Phe/Val dehydrogenase, dimerisation domain)	AT5G18170	glutamate dehydrogenase 1
MT4Noble_053042	5.95848	1.3664	4.36073	1.29632e-05	3.40128e-05
Medtr4g097380	5.95416	0.637119	9.34546	9.14943e-21	5.81587e-20	PF01842(ACT domain)	AT5G65890	ACT domain repeat 1
Medtr8g103233	5.94145	0.541404	10.9741	5.08842e-28	4.33748e-27	PF00854(POT family)	AT3G16180	Major facilitator superfamily protein
Medtr3g498715	5.93316	0.423179	14.0205	1.16847e-44	1.80922e-43	PF00999(Sodium/hydrogen exchanger family)	AT3G44900	cation/H exchanger 4
Medtr4g118350	5.93178	0.184767	32.1041	3.86367e-226	2.14329e-223	PF00391(PEP-utilising enzyme, mobile domain), PF01326(Pyruvate phosphate dikinase, PEP/pyruvate binding domain)	AT4G15530	pyruvate orthophosphate dikinase
Medtr8g432460	5.92261	0.63536	9.32166	1.14534e-20	7.25963e-20		AT2G45760	BON association protein 2
Medtr7g114410	5.91543	1.38187	4.28074	1.86275e-05	4.82256e-05	PF00583(Acetyltransferase (GNAT) family)	AT3G22560	Acyl-CoA N-acyltransferases (NAT) superfamily protein
Medtr1g006975	5.90612	0.825149	7.15764	8.20757e-13	3.54265e-12	PF01849(NAC domain), PF00931(NB-ARC domain)	AT4G27220	NB-ARC domain-containing disease resistance protein
Medtr3g117850	5.90535	0.671907	8.78893	1.50987e-18	8.66395e-18	PF00069(Protein kinase domain)	AT4G35030	Protein kinase superfamily protein
Medtr2g086300	5.85565	0.524055	11.1737	5.48343e-29	4.86543e-28	PF00561(alpha/beta hydrolase fold)	AT3G44510	alpha/beta-Hydrolases superfamily protein
Medtr7g068650	5.85157	0.388505	15.0618	2.88948e-51	5.50164e-50	PF03171(2OG-Fe(II) oxygenase superfamily)	AT5G05600	2-oxoglutarate (2OG) and Fe(II)-dependent oxygenase superfamily protein
Medtr4g094570	5.83972	0.621194	9.40081	5.41449e-21	3.48087e-20	PF07712(Stress up-regulated Nod 19)	AT5G61820
Medtr1g018580	5.83928	0.507124	11.5145	1.11488e-30	1.05477e-29		AT4G24220	NAD(P)-binding Rossmann-fold superfamily protein
Medtr2g010730	5.83322	1.63394	3.57003	0.000356939	0.00080408	PF01657(Salt stress response/antifungal)	AT4G23160	cysteine-rich RLK (RECEPTOR-like protein kinase) 8
Medtr2g102030	5.82451	0.627971	9.27513	1.774e-20	1.11366e-19	PF03398(Regulator of Vps4 activity in the MVB pathway)	AT1G79910	Regulator of Vps4 activity in the MVB pathway protein
Medtr1g115190	5.81185	1.38052	4.2099	2.55481e-05	6.51946e-05	PF11744(Aluminium activated malate transporter)	AT4G17970	aluminum-activated, malate transporter 12
Medtr1g009900	5.79934	1.44315	4.01852	5.85649e-05	0.000144328		AT5G10625
Medtr4g026070	5.79766	0.952128	6.08916	1.13502e-09	4.05207e-09	PF00067(Cytochrome P450)	AT4G31500	cytochrome P450, family 83, subfamily B, polypeptide 1
Medtr3g079190	5.7924	1.33946	4.32443	1.5293e-05	3.98322e-05	PF04734(Neutral/alkaline non-lysosomal ceramidase, N-terminal)	AT2G38010	Neutral/alkaline non-lysosomal ceramidase
Medtr3g101410	5.78944	1.48763	3.89172	9.95346e-05	0.000239584	PF01734(Patatin-like phospholipase)	AT2G26560	phospholipase A 2A
Medtr7g072420	5.78822	0.320962	18.034	1.05424e-72	3.68168e-71	PF00202(Aminotransferase class-III)	AT3G08860	PYRIMIDINE 4
Medtr6g078290	5.78589	0.538858	10.7373	6.79921e-27	5.54353e-26	PF00197(Trypsin and protease inhibitor)	AT1G17860	Kunitz family trypsin and protease inhibitor protein
Medtr6g007633	5.77677	1.49634	3.8606	0.000113107	0.000270404	PF03083(Sugar efflux transporter for intercellular exchange)	AT5G62850	Nodulin MtN3 family protein
Medtr3g099700	5.77546	0.293105	19.7044	1.97677e-86	9.78078e-85	PF01554(MatE)	AT5G65380	MATE efflux family protein
Medtr4g057515	5.77123	1.54039	3.74661	0.00017924	0.000418077
Medtr2g073010	5.76992	0.396333	14.5583	5.17346e-48	8.90415e-47	PF00197(Trypsin and protease inhibitor)	AT1G17860	Kunitz family trypsin and protease inhibitor protein
Medtr6g029460	5.76134	0.493749	11.6686	1.84533e-31	1.80932e-30	PF02812(Glu/Leu/Phe/Val dehydrogenase, dimerisation domain), PF00208(Glutamate/Leucine/Phenylalanine/Valine dehydrogenase)	AT3G03910	glutamate dehydrogenase 3
MT4Noble_019974	5.75393	1.32295	4.34933	1.36552e-05	3.5718e-05
Medtr2g020710	5.75197	1.30636	4.40305	1.06741e-05	2.82197e-05	PF00083(Sugar (and other) transporter)	AT5G18840	Major facilitator superfamily protein
Medtr3g080850	5.74745	0.904167	6.35662	2.06238e-10	7.72316e-10	PF01053(Cys/Met metabolism PLP-dependent enzyme)	AT1G64660	methionine gamma-lyase
Medtr7g085990	5.74299	0.325498	17.6437	1.13689e-69	3.69311e-68	PF02458(Transferase family)	AT2G19070	spermidine hydroxycinnamoyl transferase
Medtr3g088520	5.7396	0.320951	17.8831	1.59708e-71	5.41991e-70	PF01301(Glycosyl hydrolases family 35)	AT1G77410	beta-galactosidase 16
Medtr1g014180	5.73751	0.5829	9.84306	7.34457e-23	5.09038e-22	PF04525(LURP-one-related)	AT5G01750	Protein of unknown function (DUF567)
Medtr2g102730	5.73497	0.361064	15.8835	8.24454e-57	1.85364e-55	PF03000(NPH3 family)	AT3G15570	Phototropic-responsive NPH3 family protein
Medtr2g078790	5.73452	0.575428	9.96567	2.15416e-23	1.52264e-22
Medtr3g110590	5.71125	0.245374	23.2757	7.81291e-120	7.69185e-118		AT2G22795
Medtr4g081380	5.68846	0.2862	19.8758	6.59192e-88	3.39554e-86	PF00085(Thioredoxin)	AT1G11530	C-terminal cysteine residue is changed to a serine 1
Medtr3g111790	5.68323	1.34829	4.21513	2.49629e-05	6.37578e-05	PF04788(Protein of unknown function (DUF620))	AT1G75160	Protein of unknown function (DUF620)
Medtr8g015250	5.68258	1.69135	3.35978	0.000780032	0.00168067	PF00170(bZIP transcription factor)	AT3G30530	basic leucine-zipper 42
Medtr1g100773	5.6797	1.373	4.13672	3.52307e-05	8.87723e-05	PF01754(A20-like zinc finger), PF01428(AN1-like Zinc finger)	AT4G22820	A20/AN1-like zinc finger family protein
Medtr5g066070	5.65777	1.16663	4.84968	1.23664e-06	3.54804e-06	PF00042(Globin)	AT3G10520	haemoglobin 2
Medtr1g088640	5.64879	0.282531	19.9935	6.2728e-89	3.3201e-87	PF00582(Universal stress protein family)	AT2G47710	Adenine nucleotide alpha hydrolases-like superfamily protein
Medtr7g098930	5.64364	1.58152	3.5685	0.000359033	0.000808356	PF00909(Ammonium Transporter Family)	AT4G13510	ammonium transporter 1;1
Medtr7g103280	5.63735	1.33375	4.2267	2.37139e-05	6.07613e-05	PF02987(Late embryogenesis abundant protein)	AT2G36640	embryonic cell protein 63
Medtr7g096930	5.60524	0.945096	5.93087	3.01328e-09	1.04661e-08	PF00249(Myb-like DNA-binding domain)	AT3G23250	myb domain protein 15
Medtr0650s0010	5.60199	0.573521	9.76771	1.5491e-22	1.06091e-21	PF04525(LURP-one-related)	AT2G05910	Protein of unknown function (DUF567)
Medtr1g019510	5.58854	1.02685	5.44242	5.25607e-08	1.67662e-07	PF00201(UDP-glucoronosyl and UDP-glucosyl transferase)	AT4G01070	UDP-Glycosyltransferase superfamily protein
Medtr7g010750	5.58668	0.186967	29.8805	3.52169e-196	1.16766e-193	PF01490(Transmembrane amino acid transporter protein)	AT3G28960	Transmembrane amino acid transporter family protein
Medtr3g106930	5.56642	0.947828	5.87282	4.28452e-09	1.47255e-08	PF02485(Core-2/I-Branching enzyme)	AT4G32290	Core-2/I-branching beta-1,6-N-acetylglucosaminyltransferase family protein
MT4Noble_057126	5.56573	0.600211	9.27295	1.81061e-20	1.1359e-19
Medtr2g099950	5.56423	0.23526	23.6514	1.14095e-123	1.22805e-121	PF08244(Glycosyl hydrolases family 32 C terminal), PF00251(Glycosyl hydrolases family 32 N-terminal domain)	AT3G13790	Glycosyl hydrolases family 32 protein
Medtr7g051430	5.53159	1.6061	3.44411	0.000572945	0.00125634	PF00450(Serine carboxypeptidase)	AT4G12910	serine carboxypeptidase-like 20
Medtr3g024520	5.52367	0.414231	13.3347	1.45347e-40	1.95371e-39	PF00067(Cytochrome P450)	AT5G07990	Cytochrome P450 superfamily protein
Medtr8g080370	5.52317	0.142162	38.8511	0	0	PF01344(Kelch motif), PF00646(F-box domain)	AT1G67480	Galactose oxidase/kelch repeat superfamily protein
Medtr2g031750	5.52253	0.952933	5.7953	6.81992e-09	2.31226e-08	PF01490(Transmembrane amino acid transporter protein)	AT1G58360	amino acid permease 1
MT4Noble_021608	5.52069	1.57847	3.4975	0.000469636	0.00104225
Medtr7g086960	5.50594	1.33122	4.136	3.53407e-05	8.90415e-05	PF00249(Myb-like DNA-binding domain)	AT1G69560	myb domain protein 105
Medtr2g060350	5.50372	2.11962	2.59656	0.00941635	0.0173617	PF00295(Glycosyl hydrolases family 28)	AT3G07970	Pectin lyase-like superfamily protein
Medtr2g099040	5.50329	0.194576	28.2835	5.50796e-176	1.34646e-173	PF05187(Electron transfer flavoprotein-ubiquinone oxidoreductase, 4Fe-4S)	AT2G43400	electron-transfer flavoprotein:ubiquinone oxidoreductase
Medtr7g107690	5.4909	0.450782	12.1809	3.93154e-34	4.26351e-33	PF00743(Flavin-binding monooxygenase-like)	AT1G48910	Flavin-containing monooxygenase family protein
Medtr4g026050	5.46477	0.376047	14.5321	7.58186e-48	1.30182e-46	PF00067(Cytochrome P450)	AT4G31500	cytochrome P450, family 83, subfamily B, polypeptide 1
Medtr2g030405	5.45851	0.484213	11.2729	1.78521e-29	1.6138e-28		AT2G27950	Ring/U-Box superfamily protein
Medtr0428s0040	5.45615	1.88165	2.89967	0.00373558	0.00735318
Medtr4g128410	5.4536	0.772886	7.05615	1.71175e-12	7.26777e-12	PF00722(Glycosyl hydrolases family 16), PF06955(Xyloglucan endo-transglycosylase (XET) C-terminus)	AT4G25810	xyloglucan endotransglycosylase 6
Medtr2g015540	5.45116	0.41879	13.0165	9.86448e-39	1.24694e-37		AT2G31090
Medtr4g023770	5.44821	0.754411	7.2218	5.13027e-13	2.2402e-12	PF08246(Cathepsin propeptide inhibitor domain (I29))	AT2G34080	Cysteine proteinases superfamily protein
Medtr7g090420	5.43971	0.544669	9.9872	1.73418e-23	1.2306e-22
Medtr8g096130	5.43566	0.369229	14.7217	4.68081e-49	8.33473e-48	PF00923(Transaldolase)	AT5G13420	Aldolase-type TIM barrel family protein
Medtr7g024750	5.43539	0.92582	5.8709	4.33441e-09	1.48934e-08	PF04535(Domain of unknown function (DUF588))	AT2G39530	Uncharacterised protein family (UPF0497)
Medtr5g010640	5.4227	0.518366	10.4612	1.30262e-25	1.01172e-24	PF00314(Thaumatin family)	AT4G11650	osmotin 34
Medtr3g013530	5.41896	1.42144	3.8123	0.000137682	0.000325725		AT2G22120	RING/FYVE/PHD zinc finger superfamily protein
Medtr2g025780	5.40976	0.188677	28.672	8.5267e-181	2.32039e-178
Medtr4g006650	5.40611	0.680017	7.94996	1.86573e-15	9.24883e-15	PF00403(Heavy-metal-associated domain), PF00230(Major intrinsic protein)	AT1G80760	NOD26-like intrinsic protein 6;1
Medtr1g090710	5.39877	2.15698	2.50293	0.012317	0.0222826	PF00319(SRF-type transcription factor (DNA-binding and dimerisation domain))	AT1G65300	AGAMOUS-like 38
MT4Noble_000351	5.39587	1.32401	4.07539	4.59371e-05	0.00011446
Medtr3g450310	5.38056	0.477776	11.2617	2.02833e-29	1.82955e-28	PF00249(Myb-like DNA-binding domain)	AT2G02060	Homeodomain-like superfamily protein
Medtr6g034905	5.37077	0.587803	9.13702	6.41975e-20	3.93507e-19	PF04554(Extensin-like region)	AT1G21310	extensin 3
Medtr5g016440	5.36905	0.504254	10.6475	1.79074e-26	1.43768e-25	PF00067(Cytochrome P450)	AT4G37340	cytochrome P450, family 81, subfamily D, polypeptide 3
Medtr2g035190	5.36589	0.364849	14.7071	5.80005e-49	1.02769e-47	PF00407(Pathogenesis-related protein Bet v I family)	AT1G24020	MLP-like protein 423
Medtr3g092150	5.36106	0.292913	18.3026	7.88979e-75	2.93663e-73	PF02183(Homeobox associated leucine zipper), PF00046(Homeobox domain)	AT2G46680	homeobox 7
Medtr5g062850	5.35565	1.6847	3.179	0.00147784	0.00307197	PF00097(Zinc finger, C3HC4 type (RING finger))	AT1G55530	RING/U-box superfamily protein
Medtr3g048300	5.35248	0.288006	18.5846	4.2803e-77	1.68215e-75	PF04450(Peptidase of plants and bacteria)	AT2G42900	Plant basic secretory protein (BSP) family protein
Medtr5g010100	5.35196	0.233706	22.9004	4.60257e-116	4.21479e-114	PF00097(Zinc finger, C3HC4 type (RING finger))	AT3G61460	brassinosteroid-responsive RING-H2
Medtr6g018900	5.351	1.43145	3.73816	0.00018537	0.000431781	PF04116(Fatty acid hydroxylase superfamily)	AT3G02580	sterol 1
Medtr8g097410	5.35046	1.51462	3.53255	0.000411569	0.000920605	PF04525(LURP-one-related)	AT1G63410	Protein of unknown function (DUF567)
Medtr4g072350	5.34864	0.471919	11.3338	8.92504e-30	8.15237e-29	PF00248(Aldo/keto reductase family)	AT1G59960	NAD(P)-linked oxidoreductase superfamily protein
Medtr3g101635	5.34778	1.58216	3.38006	0.000724704	0.00156872	PF00394(Multicopper oxidase), PF07731(Multicopper oxidase), PF07732(Multicopper oxidase)	AT5G48100	Laccase/Diphenol oxidase family protein
Medtr2g022780	5.33839	0.294096	18.1519	1.24108e-73	4.45832e-72	PF00962(Adenosine/AMP deaminase)	AT4G04880	adenosine/AMP deaminase family protein
Medtr7g104360	5.32297	0.54408	9.78344	1.3263e-22	9.09617e-22	PF00149(Calcineurin-like phosphoesterase)	AT3G52780	Purple acid phosphatases superfamily protein
Medtr1g116890	5.32231	0.710425	7.49173	6.79706e-14	3.11021e-13	PF00067(Cytochrome P450)	AT3G52970	cytochrome P450, family 76, subfamily G, polypeptide 1
Medtr4g022825	5.32029	1.13039	4.7066	2.51882e-06	7.02892e-06	PF02458(Transferase family)	AT5G67150	HXXXD-type acyl-transferase family protein
Medtr4g053250	5.31387	0.664031	8.00244	1.21974e-15	6.09891e-15	PF00170(bZIP transcription factor)	AT1G08320	bZIP transcription factor family protein
Medtr7g087100	5.31294	0.602953	8.81152	1.23458e-18	7.12968e-18	PF03016(Exostosin family)	AT3G45400	exostosin family protein
Medtr6g037610	5.30159	0.324428	16.3414	5.01139e-60	1.2366e-58	PF00847(AP2 domain)	AT5G61890	Integrase-type DNA-binding superfamily protein
Medtr4g069070	5.28511	1.11858	4.72483	2.30304e-06	6.45299e-06	PF02401(LytB protein)	AT4G34350	4-hydroxy-3-methylbut-2-enyl diphosphate reductase
Medtr8g078240	5.28079	1.45631	3.62614	0.000287692	0.000655253	PF01501(Glycosyl transferase family 8)	AT3G50760	galacturonosyltransferase-like 2
Medtr8g088070	5.27967	1.48041	3.56635	0.000361984	0.000814619	PF01925(Sulfite exporter TauE/SafE)	AT2G25737	Sulfite exporter TauE/SafE family protein
Medtr1g044785	5.27273	0.479877	10.9877	4.3811e-28	3.7434e-27	PF06203(CCT motif)	AT1G04500	CCT motif family protein
Medtr1g069805	5.27251	0.736291	7.16091	8.01414e-13	3.46123e-12	PF02365(No apical meristem (NAM) protein)	AT4G28530	NAC domain containing protein 74
Medtr2g084965	5.26949	1.43127	3.68169	0.00023169	0.000533513	PF05910(Plant protein of unknown function (DUF868))	AT2G27770	Plant protein of unknown function (DUF868)
Medtr7g069930	5.2677	1.09079	4.82923	1.3706e-06	3.91525e-06		AT3G51750
Medtr0032s0080	5.26641	1.38741	3.79586	0.000147133	0.000347004		AT1G78922
Medtr5g016090	5.25905	0.761699	6.90437	5.0427e-12	2.08458e-11		AT4G33910	2-oxoglutarate (2OG) and Fe(II)-dependent oxygenase superfamily protein
Medtr0020s0120	5.25782	1.35632	3.87654	0.000105953	0.000254271	PF01161(Phosphatidylethanolamine-binding protein)	AT5G62040	PEBP (phosphatidylethanolamine-binding protein) family protein
Medtr2g089835	5.25251	0.902513	5.81987	5.88935e-09	2.00501e-08	PF12609(Wound-induced protein)	AT4G10270	Wound-responsive family protein
Medtr7g110790	5.25096	1.83876	2.8557	0.0042942	0.00836568	PF02309(AUX/IAA family)	AT2G46990	indole-3-acetic acid inducible 20
Medtr4g019710	5.24913	0.578176	9.07878	1.09803e-19	6.66815e-19		AT5G02020
Medtr3g105340	5.23725	0.224173	23.3625	1.02877e-120	1.04493e-118	PF07911(Protein of unknown function (DUF1677))	AT1G72510	Protein of unknown function (DUF1677)
Medtr7g079820	5.22196	1.33072	3.92416	8.70317e-05	0.000210844	PF00190(Cupin)	AT3G22640	cupin family protein
MT4Noble_000350	5.21136	1.39762	3.72874	0.000192437	0.000447399
Medtr2g064950	5.21036	1.42345	3.66037	0.000251854	0.000577364		AT4G12560	F-box and associated interaction domains-containing protein
Medtr4g094418	5.2095	1.41268	3.68768	0.000226312	0.000521464	PF01565(FAD binding domain ), PF08031(Berberine and berberine like )	AT4G20820	FAD-binding Berberine family protein
Medtr7g102450	5.20614	0.544886	9.55455	1.2412e-21	8.1837e-21	PF00201(UDP-glucoronosyl and UDP-glucosyl transferase)	AT2G36750	UDP-glucosyl transferase 73C1
Medtr2g084315	5.20588	0.405351	12.8429	9.42576e-38	1.15848e-36		AT2G28200	C2H2-type zinc finger family protein
Medtr4g120200	5.20452	0.684149	7.60729	2.79897e-14	1.30836e-13
Medtr5g078020	5.19781	0.735944	7.06278	1.63209e-12	6.93667e-12	PF00293(NUDIX domain)	AT2G01670	nudix hydrolase homolog 17
Medtr4g123050	5.19578	2.07452	2.50457	0.0122601	0.0221839
Medtr1g104750	5.19393	1.4429	3.59965	0.00031864	0.000721638	PF00083(Sugar (and other) transporter)	AT5G26340	Major facilitator superfamily protein
Medtr4g066580	5.19283	0.805615	6.4458	1.1499e-10	4.37887e-10	PF00232(Glycosyl hydrolase family 1)	AT2G44480	beta glucosidase 17
Medtr7g111830	5.19269	1.95426	2.65711	0.00788135	0.0147092	PF00892(EamA-like transporter family)	AT1G09380	nodulin MtN21 /EamA-like transporter family protein
Medtr7g026977	5.18612	2.13297	2.43141	0.0150402	0.0267809		AT5G01860	C2H2 and C2HC zinc fingers superfamily protein
Medtr3g030540	5.17267	1.01441	5.0992	3.41098e-07	1.02718e-06	PF00295(Glycosyl hydrolases family 28)	AT3G07970	Pectin lyase-like superfamily protein
Medtr5g020060	5.17255	0.266719	19.3932	8.80259e-84	4.1355e-82		AT5G66780
Medtr1g029150	5.16607	0.472781	10.927	8.56435e-28	7.21096e-27	PF03405(Fatty acid desaturase)	AT1G43800	Plant stearoyl-acyl-carrier-protein desaturase family protein
Medtr2g013010	5.16171	0.571315	9.03478	1.64331e-19	9.8962e-19	PF12143(Protein of unknown function (DUF_B2219)), PF00264(Common central domain of tyrosinase), PF12142(Polyphenol oxidase middle domain)
Medtr3g077000	5.15944	0.252848	20.4053	1.50019e-92	8.55224e-91	PF00168(C2 domain), PF02893(GRAM domain)	AT5G50170	C2 calcium/lipid-binding and GRAM domain containing protein
Medtr1g108990	5.15325	0.286898	17.962	3.86707e-72	1.34074e-70	PF01554(MatE)	AT1G71140	MATE efflux family protein
Medtr4g129290	5.14907	1.30814	3.93617	8.27914e-05	0.000200959
Medtr1g044340	5.14897	0.704713	7.30647	2.74247e-13	1.21445e-12	PF03407(Nucleotide-diphospho-sugar transferase)	AT1G28710	Nucleotide-diphospho-sugar transferase family protein
MT4Noble_020366	5.14873	0.464633	11.0813	1.54636e-28	1.34803e-27
Medtr4g021330	5.14834	0.505525	10.1841	2.33425e-24	1.72253e-23		AT2G37750
Medtr7g092430	5.12645	0.460831	11.1244	9.54844e-29	8.39483e-28	PF00560(Leucine Rich Repeat), PF08263(Leucine rich repeat N-terminal domain), PF00069(Protein kinase domain)	AT5G06940	Leucine-rich repeat receptor-like protein kinase family protein
Medtr2g080280	5.12447	0.443983	11.542	8.09749e-31	7.72166e-30
Medtr2g024030	5.10557	0.60111	8.49357	2.00379e-17	1.09805e-16	PF04885(Stigma-specific protein, Stig1)	AT1G11925	Stigma-specific Stig1 family protein
Medtr8g467000	5.10506	0.384799	13.2668	3.60599e-40	4.78905e-39	PF03321(GH3 auxin-responsive promoter)	AT5G54510	Auxin-responsive GH3 family protein
Medtr4g081110	5.10484	0.525355	9.71693	2.55356e-22	1.73236e-21	PF00566(Rab-GTPase-TBC domain)	AT4G27100	Ypt/Rab-GAP domain of gyp1p superfamily protein
Medtr1g029140	5.1032	0.702884	7.26038	3.86014e-13	1.69689e-12		AT1G43790	tracheary element differentiation-related 6
Medtr1g040420	5.10229	1.41679	3.60129	0.00031664	0.000717727		AT4G23460	Adaptin family protein
Medtr2g030400	5.10198	0.147712	34.5401	2.0079e-261	1.99724e-258	PF03446(NAD binding domain of 6-phosphogluconate dehydrogenase)	AT4G20930	6-phosphogluconate dehydrogenase family protein
Medtr4g099400	5.10154	0.552423	9.23485	2.58659e-20	1.61116e-19	PF01357(Pollen allergen), PF03330(Rare lipoprotein A (RlpA)-like double-psi beta-barrel)	AT4G17030	expansin-like B1
Medtr6g018920	5.09839	1.99524	2.55528	0.0106104	0.0193946	PF00319(SRF-type transcription factor (DNA-binding and dimerisation domain))	AT5G55690	MADS-box transcription factor family protein
Medtr8g019330	5.09467	1.61028	3.16385	0.00155696	0.00322552
Medtr2g075550	5.08432	0.565104	8.99714	2.31683e-19	1.38224e-18
Medtr1g017840	5.07935	0.888888	5.71427	1.10174e-08	3.67322e-08		AT2G04420	Polynucleotidyl transferase, ribonuclease H-like superfamily protein
Medtr4g105020	5.0791	0.38507	13.1901	1.00088e-39	1.30581e-38	PF00564(PB1 domain)	AT3G48240	Octicosapeptide/Phox/Bem1p family protein
Medtr7g066780	5.07512	0.654902	7.74944	9.22969e-15	4.43585e-14	PF07690(Major Facilitator Superfamily)	AT2G38060	phosphate transporter 4;2
Medtr1g107395	5.07187	0.770272	6.58453	4.56341e-11	1.78393e-10
Medtr3g098910	5.06704	0.305251	16.5996	7.01564e-62	1.81338e-60	PF03083(Sugar efflux transporter for intercellular exchange)	AT5G50800	Nodulin MtN3 family protein
Medtr7g077170	5.04612	1.45926	3.45801	0.000544175	0.00119708	PF00862(Sucrose synthase)
Medtr7g086990	5.04582	1.35052	3.73619	0.000186828	0.000434932
MT4Noble_022322	5.04516	1.27746	3.94936	7.83588e-05	0.000190665
Medtr1g073760	5.04086	2.02701	2.48685	0.0128879	0.0232484	PF05664(Plant family of unknown function (DUF810))	AT2G33420	Protein of unknown function (DUF810)
Medtr2g435550	5.03001	1.10739	4.54223	5.56631e-06	1.50837e-05	PF00481(Protein phosphatase 2C)	AT3G05640	Protein phosphatase 2C family protein
Medtr2g005130	4.99595	0.401037	12.4576	1.27181e-35	1.45524e-34	PF00854(POT family)	AT1G59740	Major facilitator superfamily protein
Medtr1g095530	4.99175	0.309177	16.1453	1.22555e-58	2.90249e-57	PF00335(Tetraspanin family)	AT3G12090	tetraspanin6
Medtr7g084620	4.99055	1.34982	3.6972	0.000217988	0.000503087	PF03492(SAM dependent carboxyl methyltransferase)	AT5G38020	S-adenosyl-L-methionine-dependent methyltransferases superfamily protein
Medtr4g060480	4.98996	0.129224	38.6149	0	0	PF02770(Acyl-CoA dehydrogenase, middle domain), PF00441(Acyl-CoA dehydrogenase, C-terminal domain), PF02771(Acyl-CoA dehydrogenase, N-terminal domain)	AT3G45300	isovaleryl-CoA-dehydrogenase
Medtr5g006430	4.98945	0.932304	5.35174	8.7113e-08	2.73762e-07	PF07911(Protein of unknown function (DUF1677))	AT3G22540	Protein of unknown function (DUF1677)
Medtr3g028460	4.98719	0.457879	10.8919	1.25951e-27	1.05616e-26
Medtr1g067480	4.98629	0.575975	8.65713	4.83793e-18	2.71719e-17	PF03081(Exo70 exocyst complex subunit)	AT3G09520	exocyst subunit exo70 family protein H4
Medtr8g037800	4.98334	1.74282	2.85935	0.00424505	0.00827738		AT2G16385
Medtr3g081380	4.97898	1.46538	3.39775	0.000679434	0.0014766	PF00569(Zinc finger, ZZ type), PF00249(Myb-like DNA-binding domain)	AT4G16420	homolog of yeast ADA2 2B
Medtr3g080810	4.9789	1.76539	2.82028	0.0047982	0.00927177	PF00759(Glycosyl hydrolase family 9)	AT1G02800	cellulase 2
Medtr7g084350	4.97746	2.07506	2.39871	0.0164531	0.0291026	PF03492(SAM dependent carboxyl methyltransferase)	AT5G66430	S-adenosyl-L-methionine-dependent methyltransferases superfamily protein
Medtr8g093550	4.97276	2.22896	2.23098	0.0256827	0.0436432	PF00266(Aminotransferase class-V)
Medtr3g465510	4.97231	0.782232	6.35657	2.06306e-10	7.72467e-10	PF01490(Transmembrane amino acid transporter protein)	AT3G28960	Transmembrane amino acid transporter family protein
Medtr3g071950	4.96842	1.89407	2.62315	0.00871201	0.0161456		AT2G40390
Medtr4g090525	4.96692	0.215677	23.0294	2.36377e-117	2.20665e-115	PF00459(Inositol monophosphatase family)	AT5G54390	HAL2-like
Medtr8g045570	4.96349	1.71729	2.89031	0.0038486	0.00756039	PF00407(Pathogenesis-related protein Bet v I family)	AT5G28010	Polyketide cyclase/dehydrase and lipid transport superfamily protein
Medtr2g035150	4.96216	0.606573	8.18065	2.82321e-16	1.45607e-15	PF00407(Pathogenesis-related protein Bet v I family)
Medtr5g012040	4.95852	1.87704	2.64167	0.00824995	0.0153495
Medtr8g007435	4.95299	1.18259	4.18826	2.81095e-05	7.13963e-05
Medtr1g069070	4.95088	1.4848	3.33437	0.000854929	0.00183342
Medtr1g095740	4.94797	1.01279	4.88547	1.03183e-06	2.98477e-06	PF00612(IQ calmodulin-binding motif)	AT5G03040	IQ-domain 2
Medtr8g102150	4.94777	0.29005	17.0583	3.03094e-65	8.54647e-64	PF05153(Myo-inositol oxygenase)	AT2G19800	myo-inositol oxygenase 2
Medtr8g080570	4.94763	1.44451	3.42512	0.000614518	0.00134199	PF05755(Rubber elongation factor protein (REF))	AT1G67360	Rubber elongation factor protein (REF)
Medtr5g043330	4.94562	1.65448	2.98923	0.00279683	0.00559949
Medtr1g090100	4.94296	1.48929	3.31901	0.000903362	0.00193082	PF02798(Glutathione S-transferase, N-terminal domain), PF00043(Glutathione S-transferase, C-terminal domain)	AT2G29450	glutathione S-transferase tau 5
Medtr2g103480	4.94147	1.38694	3.56287	0.000366824	0.000824932
Medtr3g467220	4.93289	1.35736	3.63418	0.000278865	0.000636	PF00067(Cytochrome P450)	AT5G05260	cytochrome p450 79a2
Medtr1g004990	4.93125	0.428484	11.5086	1.19418e-30	1.12905e-29	PF00069(Protein kinase domain)	AT4G28880	casein kinase I-like 3
Medtr8g024520	4.92426	0.345887	14.2366	5.42884e-46	8.83251e-45	PF00076(RNA recognition motif. (a.k.a. RRM, RBD, or RNP domain))	AT2G46780	RNA-binding (RRM/RBD/RNP motifs) family protein
Medtr7g068500	4.91094	0.722846	6.79389	1.09147e-11	4.42697e-11	PF00657(GDSL-like Lipase/Acylhydrolase)	AT3G11210	SGNH hydrolase-type esterase superfamily protein
Medtr5g071350	4.90887	1.27835	3.84001	0.00012303	0.00029279	PF03005()	AT5G58600	Plant protein of unknown function (DUF828)
Medtr1g090717	4.90856	0.422609	11.6149	3.4624e-31	3.34706e-30	PF00071(Ras family)	AT5G03530	RAB GTPase homolog C2A
Medtr4g008860	4.90456	1.73912	2.82013	0.00480035	0.0092753	PF00847(AP2 domain)	AT5G25190	Integrase-type DNA-binding superfamily protein
MT4Noble_001008	4.89833	1.10081	4.44975	8.59706e-06	2.29239e-05
Medtr8g041390	4.8959	0.259377	18.8756	1.81006e-79	7.53435e-78	PF00892(EamA-like transporter family)	AT5G07050	nodulin MtN21 /EamA-like transporter family protein
Medtr4g070370	4.89418	1.804	2.71296	0.00666842	0.0125954	PF05368(NmrA-like family)	AT4G39230	NmrA-like negative transcriptional regulator family protein
Medtr7g406880	4.88873	0.460626	10.6132	2.58624e-26	2.06085e-25	PF07859(alpha/beta hydrolase fold)	AT5G16080	carboxyesterase 17
Medtr2g034340	4.88291	0.452094	10.8007	3.41751e-27	2.82226e-26
Medtr5g064950	4.87936	1.48633	3.28281	0.00102777	0.00217881	PF00010(Helix-loop-helix DNA-binding domain)	AT1G72210	basic helix-loop-helix (bHLH) DNA-binding superfamily protein
Medtr2g038705	4.87065	1.408	3.45927	0.000541645	0.00119197	PF06955(Xyloglucan endo-transglycosylase (XET) C-terminus), PF00722(Glycosyl hydrolases family 16)	AT4G25810	xyloglucan endotransglycosylase 6
Medtr4g029180	4.86874	2.07962	2.34117	0.0192234	0.0335441	PF00141(Peroxidase)	AT5G05340	Peroxidase superfamily protein
Medtr3g026160	4.86851	1.45014	3.35727	0.000787153	0.00169538		AT5G09530	hydroxyproline-rich glycoprotein family protein
Medtr4g093530	4.86335	1.15363	4.21568	2.49031e-05	6.36218e-05
Medtr8g018370	4.8564	0.967691	5.01854	5.20644e-07	1.54432e-06	PF00271(Helicase conserved C-terminal domain), PF00270(DEAD/DEAH box helicase)	AT1G54270	eif4a-2
Medtr4g098480	4.84057	0.440837	10.9804	4.74765e-28	4.053e-27	PF03760(Late embryogenesis abundant (LEA) group 1 )	AT1G32560	Late embryogenesis abundant protein, group 1 protein
Medtr2g075540	4.8391	0.512887	9.43501	3.90963e-21	2.52524e-20
Medtr2g021690	4.83357	0.315932	15.2994	7.71517e-53	1.52328e-51	PF04819(Family of unknown function (DUF716) )	AT1G55230	Family of unknown function (DUF716)
Medtr7g111240	4.8302	0.227693	21.2136	7.14849e-100	4.86333e-98	PF00190(Cupin)	AT1G09560	germin-like protein 5
MT4Noble_019881	4.8295	1.38246	3.49342	0.000476884	0.00105752
Medtr8g016390	4.82436	1.30121	3.70758	0.000209245	0.000484382		AT3G20790	NAD(P)-binding Rossmann-fold superfamily protein
Medtr1g033900	4.82083	1.23279	3.9105	9.21038e-05	0.00022244	PF07816(Protein of unknown function (DUF1645))	AT2G15760	Protein of unknown function (DUF1645)
Medtr4g132000	4.81814	0.269115	17.9036	1.10523e-71	3.77741e-70
Medtr4g124440	4.80473	1.2733	3.77345	0.000161005	0.000377425	PF00332(Glycosyl hydrolases family 17), PF07983(X8 domain)	AT5G20870	O-Glycosyl hydrolases family 17 protein
Medtr8g022990	4.79419	0.720699	6.65214	2.88863e-11	1.14284e-10	PF03242(Late embryogenesis abundant protein)
Medtr1g022440	4.78971	0.514419	9.31091	1.26743e-20	8.0071e-20	PF01370(NAD dependent epimerase/dehydratase family)	AT5G42800	dihydroflavonol 4-reductase
Medtr2g024260	4.78904	1.50911	3.17343	0.00150651	0.00312752		AT3G21630	chitin elicitor receptor kinase 1
Medtr8g096730	4.78542	0.67388	7.10129	1.23602e-12	5.29073e-12	PF03106(WRKY DNA -binding domain)	AT5G13080	WRKY DNA-binding protein 75
Medtr3g102970	4.78288	1.48631	3.21796	0.00129105	0.0027022
Medtr8g022130	4.78272	1.39238	3.43492	0.000592721	0.00129724	PF02705(K potassium transporter)	AT4G13420	high affinity K transporter 5
Medtr6g087320	4.7827	0.735945	6.49872	8.10047e-11	3.11597e-10	PF00560(Leucine Rich Repeat), PF01582(TIR domain), PF00931(NB-ARC domain)	AT5G17680	disease resistance protein (TIR-NBS-LRR class), putative
Medtr8g079010	4.78255	1.375	3.47821	0.000504782	0.00111527	PF00503(G-protein alpha subunit)	AT2G23460	extra-large G-protein 1
Medtr2g083380	4.77429	1.36387	3.50053	0.000464329	0.00103094	PF00201(UDP-glucoronosyl and UDP-glucosyl transferase)	AT5G54010	UDP-Glycosyltransferase superfamily protein
Medtr1g063950	4.77024	1.64112	2.9067	0.00365267	0.00719952	PF02519(Auxin responsive protein)	AT2G37030	SAUR-like auxin-responsive protein family
Medtr2g031920	4.76635	1.94006	2.4568	0.0140181	0.0251096	PF00067(Cytochrome P450)	AT2G32440	ent-kaurenoic acid hydroxylase 2
Medtr3g095630	4.76585	2.19298	2.17323	0.0297628	0.049944	PF08387(FBD)	AT5G56420	F-box/RNI-like/FBD-like domains-containing protein
Medtr4g124470	4.76546	0.205437	23.1968	4.90892e-119	4.73588e-117	PF04455(LOR/SDH bifunctional enzyme conserved region ), PF05222(Alanine dehydrogenase/PNT, N-terminal domain), PF03435(Saccharopine dehydrogenase NADP binding domain), PF01262(Alanine dehydrogenase/PNT, C-terminal domain)	AT4G33150	lysine-ketoglutarate reductase/saccharopine dehydrogenase bifunctional enzyme
Medtr6g471240	4.76483	0.288526	16.5144	2.89209e-61	7.409e-60	PF00560(Leucine Rich Repeat), PF08263(Leucine rich repeat N-terminal domain)	AT3G11010	receptor like protein 34
Medtr7g084760	4.75838	0.774977	6.14003	8.25043e-10	2.97081e-09	PF00722(Glycosyl hydrolases family 16), PF06955(Xyloglucan endo-transglycosylase (XET) C-terminus)	AT5G13870	xyloglucan endotransglucosylase/hydrolase 5
Medtr8g098945	4.75023	0.584862	8.12196	4.58699e-16	2.34147e-15	PF03106(WRKY DNA -binding domain)	AT4G23550	WRKY family transcription factor
Medtr2g075780	4.74773	0.284477	16.6893	1.56793e-62	4.14939e-61	PF07722(Peptidase C26)	AT1G78680	gamma-glutamyl hydrolase 2
Medtr4g087100	4.74594	0.998368	4.7537	1.99725e-06	5.62624e-06	PF03171(2OG-Fe(II) oxygenase superfamily)	AT3G19000	2-oxoglutarate (2OG) and Fe(II)-dependent oxygenase superfamily protein
Medtr7g017880	4.74409	0.23171	20.4742	3.65485e-93	2.11278e-91	PF00170(bZIP transcription factor)	AT3G30530	basic leucine-zipper 42
MT4Noble_027449	4.7382	0.887162	5.34085	9.25114e-08	2.89874e-07
Medtr4g117520	4.72622	1.31056	3.60626	0.000310639	0.000704622		AT3G06210	ARM repeat superfamily protein
Medtr5g074290	4.72489	0.25552	18.4912	2.42861e-76	9.32832e-75		AT1G06980
Medtr2g038860	4.7248	1.41473	3.33971	0.000838661	0.00180027	PF00722(Glycosyl hydrolases family 16), PF06955(Xyloglucan endo-transglycosylase (XET) C-terminus)	AT4G25810	xyloglucan endotransglycosylase 6
Medtr5g025010	4.72334	0.286142	16.507	3.2667e-61	8.35382e-60	PF00082(Subtilase family), PF02225(PA domain), PF05922(Peptidase inhibitor I9)	AT2G04160	Subtilisin-like serine endopeptidase family protein
Medtr1g110570	4.72062	0.571537	8.25951	1.46272e-16	7.65069e-16	PF05678(VQ motif)	AT1G68450	VQ motif-containing protein
Medtr5g089180	4.70396	0.58265	8.07338	6.83804e-16	3.45931e-15
Medtr5g004800	4.70339	0.349365	13.4627	2.59252e-41	3.57134e-40	PF00168(C2 domain)	AT4G34150	Calcium-dependent lipid-binding (CaLB domain) family protein
Medtr1g012620	4.70099	0.196138	23.9677	6.03967e-127	6.85907e-125		AT4G32190	Myosin heavy chain-related protein
Medtr5g036660	4.7003	0.272374	17.2568	9.94558e-67	2.92447e-65	PF08148(DSHCT (NUC185) domain), PF00270(DEAD/DEAH box helicase), PF00271(Helicase conserved C-terminal domain)	AT1G70070	DEAD/DEAH box helicase, putative
Medtr1g025490	4.69602	0.324108	14.4891	1.42052e-47	2.41748e-46		AT1G75810
Medtr1g070010	4.68469	1.60154	2.92512	0.00344325	0.00681047
Medtr2g020240	4.68324	0.167847	27.9019	2.53097e-171	5.88778e-169	PF01373(Glycosyl hydrolase family 14)	AT5G18670	beta-amylase 3
Medtr3g063490	4.68161	2.04931	2.28448	0.0223432	0.0384371	PF03169(OPT oligopeptide transporter protein)	AT1G65730	YELLOW STRIPE like 7
Medtr5g024670	4.68069	1.76842	2.64681	0.0081255	0.0151286
Medtr8g035680	4.68051	1.4909	3.13938	0.00169306	0.00349043	PF00067(Cytochrome P450)	AT2G45510	cytochrome P450, family 704, subfamily A, polypeptide 2
Medtr4g025670	4.67737	1.46355	3.19591	0.0013939	0.00290901	PF04043(Plant invertase/pectin methylesterase inhibitor), PF01095(Pectinesterase)	AT3G60730	Plant invertase/pectin methylesterase inhibitor superfamily
MT4Noble_056922	4.67553	1.40549	3.32661	0.000879078	0.00188268
MT4Noble_056923	4.67553	1.40549	3.32661	0.000879078	0.00188268
Medtr4g010210	4.67227	2.02483	2.30749	0.0210278	0.036378	PF01429(Methyl-CpG binding domain)	AT1G15340	methyl-CPG-binding domain 10
MT4Noble_016690	4.67183	2.04195	2.28792	0.0221419	0.038118
Medtr3g095720	4.671	1.72051	2.71489	0.00662975	0.0125273	PF05970(PIF1-like helicase)	AT3G51690	PIF1 helicase
Medtr5g035560	4.66485	0.749684	6.22241	4.89563e-10	1.78917e-09	PF00201(UDP-glucoronosyl and UDP-glucosyl transferase)	AT1G24100	UDP-glucosyl transferase 74B1
Medtr3g108830	4.64996	1.60652	2.89443	0.00379848	0.00746782	PF07839(Plant calmodulin-binding domain)	AT5G10660	calmodulin-binding protein-related
Medtr4g106500	4.64988	0.309304	15.0334	4.43934e-51	8.3917e-50		AT1G19020
Medtr7g028020	4.64919	0.486522	9.55597	1.22433e-21	8.07612e-21	PF00067(Cytochrome P450)	AT5G06900	cytochrome P450, family 93, subfamily D, polypeptide 1
Medtr4g088200	4.64881	0.684018	6.79632	1.07326e-11	4.35799e-11	PF00891(O-methyltransferase), PF08100(Dimerisation domain)	AT4G35150	O-methyltransferase family protein
MT4Noble_022950	4.62578	0.348608	13.2693	3.48895e-40	4.63789e-39
Medtr4g082365	4.62392	0.93363	4.95263	7.32175e-07	2.1455e-06		AT3G11810
Medtr2g028580	4.62175	0.665031	6.94968	3.66112e-12	1.52879e-11	PF00069(Protein kinase domain)	AT5G49760	Leucine-rich repeat protein kinase family protein
Medtr4g092110	4.61779	0.477724	9.66623	4.19569e-22	2.82448e-21	PF02679((2R)-phospho-3-sulfolactate synthase (ComA))	AT4G21320	Aldolase-type TIM barrel family protein
Medtr7g085930	4.61731	0.250234	18.452	5.02629e-76	1.92292e-74	PF02458(Transferase family)	AT2G19070	spermidine hydroxycinnamoyl transferase
Medtr7g053103	4.60812	0.242029	19.0395	8.02334e-81	3.51201e-79		AT3G19510	Homeodomain-like protein with RING/FYVE/PHD-type zinc finger domain
Medtr4g128260	4.60242	0.429042	10.7272	7.58537e-27	6.16881e-26	PF00004(ATPase family associated with various cellular activities (AAA))	AT5G57480	P-loop containing nucleoside triphosphate hydrolases superfamily protein
Medtr8g089342	4.59092	1.41472	3.24512	0.00117402	0.00247052		AT4G21120	amino acid transporter 1
Medtr7g107570	4.58767	0.790505	5.80346	6.49585e-09	2.20576e-08		AT3G62990
Medtr1g107410	4.58715	2.10514	2.17902	0.02933	0.0492693		AT2G23270
Medtr4g070640	4.56764	0.399684	11.4281	3.02638e-30	2.81791e-29		AT5G66440
Medtr8g091950	4.56135	1.68352	2.70941	0.00674027	0.0127203		AT5G64820
Medtr3g111970	4.5612	0.660923	6.90126	5.15438e-12	2.12952e-11		AT1G19530
Medtr5g045770	4.56111	0.314713	14.4929	1.34274e-47	2.28782e-46	PF00067(Cytochrome P450)	AT4G31500	cytochrome P450, family 83, subfamily B, polypeptide 1
Medtr5g096390	4.5592	1.90846	2.38895	0.0168968	0.0298217	PF01061(ABC-2 type transporter), PF00005(ABC transporter)	AT3G13220	ABC-2 type transporter family protein
Medtr7g098780	4.55842	1.05313	4.32845	1.50165e-05	3.91439e-05	PF01061(ABC-2 type transporter), PF00005(ABC transporter), PF08370(Plant PDR ABC transporter associated)	AT1G15520	pleiotropic drug resistance 12
Medtr1g100355	4.54997	1.32037	3.44599	0.000568979	0.00124802
Medtr2g105800	4.53853	0.653469	6.94528	3.77701e-12	1.57558e-11		AT3G03280
Medtr6g087770	4.5378	1.41141	3.21509	0.00130403	0.00272857	PF01221(Dynein light chain type 1 )	AT1G52240	RHO guanyl-nucleotide exchange factor 11
Medtr6g087150	4.52502	0.378268	11.9625	5.58604e-33	5.82345e-32	PF00097(Zinc finger, C3HC4 type (RING finger))	AT2G20030	RING/U-box superfamily protein
Medtr3g118390	4.52174	0.319917	14.1341	2.34134e-45	3.70886e-44	PF00187(Chitin recognition protein), PF00182(Chitinase class I)	AT3G12500	basic chitinase
Medtr4g118020	4.51895	0.467735	9.66135	4.40011e-22	2.95933e-21
Medtr8g012240	4.51404	0.402146	11.2249	3.07775e-29	2.75033e-28	PF04720(PDDEXK-like family of unknown function)	AT3G07350	Protein of unknown function (DUF506)
Medtr5g025050	4.51297	2.03188	2.22108	0.0263454	0.0446745	PF03171(2OG-Fe(II) oxygenase superfamily)	AT1G14130	2-oxoglutarate (2OG) and Fe(II)-dependent oxygenase superfamily protein
Medtr7g010790	4.51223	0.36913	12.224	2.31495e-34	2.53328e-33	PF01490(Transmembrane amino acid transporter protein)	AT3G28960	Transmembrane amino acid transporter family protein
Medtr4g087460	4.48771	1.954	2.29668	0.021637	0.0373358	PF00106(short chain dehydrogenase)	AT3G59710	NAD(P)-binding Rossmann-fold superfamily protein
Medtr3g069030	4.4865	0.334357	13.4183	4.7236e-41	6.45156e-40	PF00415(Regulator of chromosome condensation (RCC1) repeat)	AT3G55580	Regulator of chromosome condensation (RCC1) family protein
Medtr2g091210	4.47245	1.54391	2.89684	0.0037694	0.00741389	PF04398(Protein of unknown function, DUF538)	AT4G24130	Protein of unknown function, DUF538
Medtr7g114020	4.46786	0.312765	14.285	2.71292e-46	4.44389e-45	PF01627(Hpt domain)	AT1G03430	histidine-containing phosphotransfer factor 5
Medtr5g062370	4.46733	0.204534	21.8416	9.35245e-106	7.13706e-104	PF01915(Glycosyl hydrolase family 3 C-terminal domain), PF00933(Glycosyl hydrolase family 3 N terminal domain)	AT1G78060	Glycosyl hydrolase family protein
MT4Noble_052006	4.46636	1.4779	3.02211	0.00251022	0.00505554
Medtr6g021915	4.4656	0.521398	8.56467	1.08389e-17	5.99539e-17	PF01210(NAD-dependent glycerol-3-phosphate dehydrogenase N-terminus), PF07479(NAD-dependent glycerol-3-phosphate dehydrogenase C-terminus)	AT5G40610	NAD-dependent glycerol-3-phosphate dehydrogenase family protein
Medtr3g051460	4.46465	0.275067	16.2311	3.03798e-59	7.32111e-58	PF01625(Peptide methionine sulfoxide reductase)	AT5G61640	peptidemethionine sulfoxide reductase 1
Medtr2g094930	4.46298	0.453851	9.83359	8.06861e-23	5.57879e-22	PF00092(von Willebrand factor type A domain), PF00097(Zinc finger, C3HC4 type (RING finger))	AT5G60710	Zinc finger (C3HC4-type RING finger) family protein
Medtr6g004790	4.46284	1.83427	2.43304	0.0149727	0.0266838	PF05804(Kinesin-associated protein (KAP))	AT5G14510	ARM repeat superfamily protein
Medtr7g074865	4.46195	0.459345	9.71373	2.63507e-22	1.78681e-21	PF01370(NAD dependent epimerase/dehydratase family)	AT4G35420	dihydroflavonol 4-reductase-like1
Medtr2g011450	4.45795	0.903249	4.93546	7.9962e-07	2.33507e-06	PF00643(B-box zinc finger), PF03066(Nucleoplasmin)	AT4G27310	B-box type zinc finger family protein
Medtr3g101780	4.45747	0.220871	20.1813	1.43008e-90	7.82774e-89	PF00170(bZIP transcription factor)	AT1G45249	abscisic acid responsive elements-binding factor 2
Medtr6g005360	4.45508	1.90464	2.33907	0.019332	0.0337132	PF00190(Cupin)	AT5G39120	RmlC-like cupins superfamily protein
Medtr4g108760	4.45127	0.272327	16.3453	4.69813e-60	1.16129e-58	PF02365(No apical meristem (NAM) protein)	AT5G61430	NAC domain containing protein 100
Medtr8g107555	4.45117	1.51527	2.93755	0.00330814	0.00656348
Medtr5g090910	4.44858	0.360559	12.338	5.65236e-35	6.32459e-34	PF00043(Glutathione S-transferase, C-terminal domain)	AT2G30860	glutathione S-transferase PHI 9
Medtr5g071090	4.44406	1.55593	2.8562	0.00428739	0.00835354
Medtr7g094260	4.44321	0.388935	11.4241	3.17099e-30	2.94875e-29
Medtr1g071730	4.43938	1.44075	3.0813	0.00206096	0.00420173	PF00234(Protease inhibitor/seed storage/LTP family)	AT3G22600	Bifunctional inhibitor/lipid-transfer protein/seed storage 2S albumin superfamily protein
Medtr1750s0010	4.43724	0.326725	13.581	5.19412e-42	7.34819e-41	PF00067(Cytochrome P450)	AT3G26210	cytochrome P450, family 71, subfamily B, polypeptide 23
Medtr5g095200	4.43527	0.809059	5.48201	4.20516e-08	1.3481e-07	PF00560(Leucine Rich Repeat)	AT3G11010	receptor like protein 34
Medtr1g025450	4.4323	1.54342	2.87174	0.00408213	0.0079838	PF00112(Papain family cysteine protease)	AT5G18520	Lung seven transmembrane receptor family protein
Medtr2g017620	4.4288	1.26794	3.4929	0.00047781	0.00105941	PF00230(Major intrinsic protein)	AT4G18910	NOD26-like intrinsic protein 1;2
Medtr1g016620	4.42075	1.1287	3.91669	8.9773e-05	0.000217193	PF00481(Protein phosphatase 2C)	AT1G79630	Protein phosphatase 2C family protein
Medtr1g057640	4.41675	1.98799	2.22172	0.0263024	0.0446069
Medtr3g034370	4.41438	0.456455	9.671	4.00452e-22	2.69831e-21		AT1G01550	Protein of unknown function (DUF793)
Medtr2g073190	4.41416	0.275231	16.038	6.93414e-58	1.6079e-56	PF01758(Sodium Bile acid symporter family), PF03083(Sugar efflux transporter for intercellular exchange)	AT1G78560	Sodium Bile acid symporter family
Medtr3g110595	4.41368	0.480763	9.18058	4.28795e-20	2.64408e-19
Medtr4g072360	4.40209	0.809577	5.43752	5.40281e-08	1.72228e-07	PF00248(Aldo/keto reductase family)	AT1G59960	NAD(P)-linked oxidoreductase superfamily protein
Medtr5g072960	4.39667	0.385944	11.392	4.58356e-30	4.23638e-29		AT1G13080	cytochrome P450, family 71, subfamily B, polypeptide 2
Medtr6g004430	4.39498	0.287223	15.3016	7.45565e-53	1.47305e-51	PF00288(GHMP kinases N terminal domain)	AT3G01640	glucuronokinase G
Medtr5g091930	4.3936	0.258021	17.0281	5.08505e-65	1.42273e-63	PF00285(Citrate synthase)	AT3G58750	citrate synthase 2
Medtr3g114840	4.38752	0.301147	14.5694	4.39945e-48	7.5901e-47	PF00168(C2 domain), PF00614(Phospholipase D Active site motif)	AT4G35790	phospholipase D delta
Medtr5g082630	4.38583	0.692805	6.33054	2.44309e-10	9.10392e-10	PF00069(Protein kinase domain)	AT3G55950	CRINKLY4 related 3
Medtr8g041710	4.38387	1.9361	2.26428	0.0235571	0.0403544	PF07714(Protein tyrosine kinase), PF01657(Salt stress response/antifungal), PF11883(Domain of unknown function (DUF3403))	AT4G05200	cysteine-rich RLK (RECEPTOR-like protein kinase) 25
Medtr6g005310	4.38135	1.44798	3.02584	0.00247943	0.00499801	PF00190(Cupin)	AT5G39120	RmlC-like cupins superfamily protein
Medtr6g028140	4.372	0.810351	5.3952	6.84485e-08	2.16736e-07	PF05739(SNARE domain), PF00804(Syntaxin)	AT3G03800	syntaxin of plants 131
Medtr3g108860	4.37141	0.295499	14.7933	1.61803e-49	2.9062e-48		AT2G24540	Galactose oxidase/kelch repeat superfamily protein
Medtr3g108020	4.36671	1.96823	2.2186	0.026514	0.0449447	PF00226(DnaJ domain), PF01556(DnaJ C terminal domain)	AT5G25530	DNAJ heat shock family protein
Medtr5g080360	4.36639	0.546594	7.98836	1.36745e-15	6.8174e-15		AT3G11430	glycerol-3-phosphate acyltransferase 5
Medtr1g009190	4.36577	0.137973	31.6421	9.72898e-220	4.67737e-217	PF00288(GHMP kinases N terminal domain), PF10509(Galactokinase galactose-binding signature)	AT4G16130	arabinose kinase
Medtr4g088770	4.36449	0.294266	14.8318	9.13136e-50	1.6504e-48	PF04720(PDDEXK-like family of unknown function)	AT4G32480	Protein of unknown function (DUF506)
Medtr7g013260	4.36073	0.228161	19.1125	1.98634e-81	8.77458e-80	PF00201(UDP-glucoronosyl and UDP-glucosyl transferase)	AT3G02100	UDP-Glycosyltransferase superfamily protein
Medtr4g094548	4.35908	0.2511	17.3599	1.66002e-67	5.00887e-66	PF07712(Stress up-regulated Nod 19)	AT5G61820
Medtr8g041870	4.35512	1.47388	2.95488	0.00312795	0.00622397	PF01657(Salt stress response/antifungal)	AT4G05200	cysteine-rich RLK (RECEPTOR-like protein kinase) 25
Medtr2g078580	4.35447	1.16014	3.75341	0.000174448	0.000407393		AT1G30330	auxin response factor 6
Medtr5g024390	4.35423	1.62602	2.67784	0.00740978	0.013892	PF00583(Acetyltransferase (GNAT) family), PF00628(PHD-finger)	AT5G58610	PHD finger transcription factor, putative
Medtr1g090450	4.3542	1.74395	2.49675	0.0125337	0.0226477	PF00097(Zinc finger, C3HC4 type (RING finger))	AT5G06490	RING/U-box superfamily protein
Medtr1g086080	4.3458	0.278191	15.6216	5.18669e-55	1.0993e-53	PF00664(ABC transporter transmembrane region), PF00005(ABC transporter)	AT3G62150	P-glycoprotein 21
Medtr4g063500	4.34217	0.498255	8.71475	2.91392e-18	1.6517e-17	PF00903(Glyoxalase/Bleomycin resistance protein/Dioxygenase superfamily)	AT1G07645	dessication-induced 1VOC superfamily protein
Medtr7g063950	4.33954	0.45417	9.55487	1.23745e-21	8.16084e-21
Medtr1g105615	4.33867	0.633407	6.84974	7.3985e-12	3.02462e-11	PF01657(Salt stress response/antifungal), PF00069(Protein kinase domain)	AT4G05200	cysteine-rich RLK (RECEPTOR-like protein kinase) 25
Medtr5g010630	4.33817	1.94955	2.22522	0.0260666	0.0442356	PF00856(SET domain)	AT1G24610	Rubisco methyltransferase family protein
Medtr5g091060	4.33703	0.169793	25.543	6.57212e-144	9.67241e-142	PF00903(Glyoxalase/Bleomycin resistance protein/Dioxygenase superfamily)	AT1G06570	phytoene desaturation 1
Medtr1g032250	4.33668	0.468019	9.26602	1.93215e-20	1.20926e-19	PF03171(2OG-Fe(II) oxygenase superfamily)	AT1G03410	2-oxoglutarate (2OG) and Fe(II)-dependent oxygenase superfamily protein
Medtr8g442570	4.33525	1.52196	2.84846	0.00439317	0.00854578
Medtr3g115210	4.33331	0.295851	14.6469	1.40939e-48	2.47897e-47		AT1G42430
Medtr8g032290	4.3313	1.58176	2.73828	0.00617617	0.0117271
Medtr4g127680	4.33101	0.336973	12.8527	8.30816e-38	1.02549e-36		AT5G57340
Medtr6g052330	4.33068	1.34965	3.20873	0.00133321	0.00278669	PF01896(Eukaryotic and archaeal DNA primase small subunit), PF03121(Herpesviridae UL52/UL70 DNA primase)	AT5G52800	DNA primases
Medtr8g095560	4.32987	1.82441	2.3733	0.0176301	0.0310001		AT3G59880
Medtr8g015910	4.3285	0.546315	7.92309	2.31685e-15	1.14379e-14	PF06888(Putative Phosphatase)	AT1G17710	Pyridoxal phosphate phosphatase-related protein
Medtr1g066380	4.32758	0.337728	12.8138	1.3719e-37	1.68042e-36	PF00141(Peroxidase)	AT2G37130	Peroxidase superfamily protein
Medtr8g026960	4.32501	0.215669	20.0539	1.86765e-89	9.99524e-88	PF02183(Homeobox associated leucine zipper), PF00046(Homeobox domain)	AT2G46680	homeobox 7
Medtr2g005210	4.32393	1.80225	2.39919	0.0164315	0.0290698
Medtr7g102840	4.32377	1.85678	2.32864	0.0198782	0.03458		AT5G27730	Protein of unknown function (DUF1624)
Medtr8g104290	4.32337	0.404692	10.6831	1.22115e-26	9.86151e-26		AT1G48780
MT4Noble_011865	4.32322	0.274899	15.7266	9.94103e-56	2.16259e-54
Medtr4g083710	4.32009	1.36061	3.17512	0.00149775	0.00311133	PF00141(Peroxidase)	AT1G14550	Peroxidase superfamily protein
Medtr5g032220	4.31383	1.84371	2.33975	0.0192965	0.0336595	PF10551(MULE transposase domain)	AT3G22170	far-red elongated hypocotyls 3
Medtr3g062600	4.31133	0.361459	11.9276	8.50359e-33	8.82355e-32	PF00252(Ribosomal protein L16p/L10e)	AT1G14320	Ribosomal protein L16p/L10e family protein
Medtr6g004740	4.31129	1.53337	2.81165	0.00492883	0.00950699		AT5G40510	Sucrase/ferredoxin-like family protein
Medtr7g055660	4.30815	0.506804	8.50062	1.88581e-17	1.03517e-16	PF00856(SET domain)	AT4G02020	SET domain-containing protein
Medtr7g063960	4.30251	1.36512	3.15175	0.00162293	0.00335255
Medtr7g009780	4.30034	0.325882	13.196	9.25189e-40	1.21034e-38	PF01011(PQQ enzyme repeat), PF10527()
Medtr3g461480	4.2985	0.218322	19.6888	2.68959e-86	1.3217e-84	PF01490(Transmembrane amino acid transporter protein)	AT5G23810	amino acid permease 7
Medtr1g015860	4.29704	0.588288	7.30432	2.7868e-13	1.23351e-12	PF00067(Cytochrome P450)	AT2G26170	cytochrome P450, family 711, subfamily A, polypeptide 1
Medtr4g107930	4.29593	1.16221	3.69634	0.000218728	0.000504754	PF08246(Cathepsin propeptide inhibitor domain (I29)), PF00112(Papain family cysteine protease)	AT5G45890	senescence-associated gene 12
Medtr1g071610	4.292	0.10958	39.1677	0	0	PF02785(Biotin carboxylase C-terminal domain), PF00289(Carbamoyl-phosphate synthase L chain, N-terminal domain), PF00364(Biotin-requiring enzyme), PF02786(Carbamoyl-phosphate synthase L chain, ATP binding domain)	AT1G03090	methylcrotonyl-CoA carboxylase alpha chain, mitochondrial / 3-methylcrotonyl-CoA carboxylase 1 (MCCA)
Medtr7g118335	4.29141	1.34678	3.18641	0.00144048	0.00300037
Medtr5g072930	4.28281	0.198087	21.6208	1.14446e-103	8.4217e-102	PF00067(Cytochrome P450)	AT4G31500	cytochrome P450, family 83, subfamily B, polypeptide 1
Medtr6g086670	4.2813	0.949612	4.50847	6.52956e-06	1.76079e-05
Medtr2g101370	4.28031	1.1492	3.72459	0.000195632	0.000454401	PF00230(Major intrinsic protein)	AT3G16240	delta tonoplast integral protein
Medtr2g079440	4.27989	0.658456	6.4999	8.03744e-11	3.09254e-10	PF00304(Gamma-thionin family)	AT5G63660	Scorpion toxin-like knottin superfamily protein
MT4Noble_026712	4.27441	0.384325	11.1219	9.81854e-29	8.62441e-28
Medtr8g093440	4.27135	0.28357	15.0628	2.84582e-51	5.42209e-50	PF04720(PDDEXK-like family of unknown function)	AT2G38820	Protein of unknown function (DUF506)
Medtr5g025800	4.26016	0.266142	16.0071	1.14009e-57	2.62256e-56		AT5G45310
Medtr8g010330	4.25718	1.32417	3.21497	0.00130456	0.00272948	PF00533(BRCA1 C Terminus (BRCT) domain), PF06732(Pescadillo N-terminus)	AT5G14520	pescadillo-related
Medtr5g056140	4.24933	0.686981	6.18551	6.19019e-10	2.24889e-09	PF02265(S1/P1 Nuclease)	AT1G68290	endonuclease 2
Medtr7g114920	4.24725	1.48163	2.86662	0.00414887	0.00810718	PF01754(A20-like zinc finger), PF01428(AN1-like Zinc finger)	AT1G12440	A20/AN1-like zinc finger family protein
Medtr2g021050	4.24386	1.25968	3.36901	0.00075438	0.00162832	PF00646(F-box domain)	AT4G12560	F-box and associated interaction domains-containing protein
Medtr5g087760	4.24357	0.606464	6.99723	2.6107e-12	1.09795e-11	PF03168(Late embryogenesis abundant protein)	AT2G27080	Late embryogenesis abundant (LEA) hydroxyproline-rich glycoprotein family
Medtr5g464760	4.24084	1.11018	3.81994	0.000133482	0.000316309	PF00201(UDP-glucoronosyl and UDP-glucosyl transferase)	AT1G22360	UDP-glucosyl transferase 85A2
Medtr2g059890	4.23726	1.4052	3.01541	0.00256631	0.00516125	PF00581(Rhodanese-like domain)	AT2G21045	Rhodanese/Cell cycle control phosphatase superfamily protein
Medtr1g106420	4.23382	0.462186	9.16041	5.17001e-20	3.18186e-19	PF03195(Protein of unknown function DUF260)	AT3G49940	LOB domain-containing protein 38
Medtr2g035130	4.23362	0.423925	9.98673	1.74232e-23	1.23608e-22	PF00407(Pathogenesis-related protein Bet v I family)
Medtr1g014650	4.23081	1.12871	3.74837	0.000177987	0.000415254
Medtr7g109590	4.22806	0.667249	6.33656	2.34949e-10	8.7687e-10		AT2G47360
Medtr5g066330	4.22256	0.196815	21.4545	4.14889e-102	2.99197e-100		AT4G38060
Medtr7g111280	4.22252	0.669601	6.30603	2.86289e-10	1.06052e-09	PF03283(Pectinacetylesterase)	AT3G05910	Pectinacetylesterase family protein
Medtr7g117405	4.22228	0.291394	14.4899	1.40291e-47	2.38892e-46	PF00201(UDP-glucoronosyl and UDP-glucosyl transferase)	AT2G36780	UDP-Glycosyltransferase superfamily protein
Medtr1g112060	4.22036	0.512293	8.23818	1.74849e-16	9.11566e-16	PF08911(NUP50 (Nucleoporin 50 kDa))	AT1G52380	NUP50 (Nucleoporin 50 kDa) protein
Medtr1g070345	4.22036	0.279842	15.0812	2.15322e-51	4.11336e-50	PF00067(Cytochrome P450)	AT5G63450	cytochrome P450, family 94, subfamily B, polypeptide 1
Medtr7g013820	4.21628	0.19677	21.4274	7.41532e-102	5.30775e-100	PF07897(Ethylene-responsive binding factor-associated repression)	AT3G29575	ABI five binding protein 3
Medtr4g087400	4.21565	0.741403	5.68605	1.30011e-08	4.31514e-08		AT5G16110
Medtr4g081870	4.21562	0.20631	20.4334	8.4349e-93	4.83724e-91	PF02365(No apical meristem (NAM) protein)	AT1G69490	NAC-like, activated by AP3/PI
Medtr3g102680	4.21455	0.622082	6.77492	1.24477e-11	5.03084e-11		AT5G43120	ARM-repeat/Tetratricopeptide repeat (TPR)-like protein
Medtr3g109100	4.21156	1.59739	2.63653	0.00837592	0.0155607	PF00069(Protein kinase domain), PF00582(Universal stress protein family)	AT2G24370	Protein kinase protein with adenine nucleotide alpha hydrolases-like domain
Medtr7g033100	4.20671	0.710599	5.91995	3.22035e-09	1.11612e-08	PF07002(Copine)	AT3G01650	RING domain ligase1
Medtr4g072260	4.20564	1.33678	3.1461	0.00165465	0.00341538	PF02519(Auxin responsive protein)	AT2G21210	SAUR-like auxin-responsive protein family
Medtr8g040640	4.20033	0.270725	15.5151	2.73994e-54	5.66975e-53		AT3G12320
Medtr6g016820	4.19396	0.221491	18.9351	5.85819e-80	2.5072e-78	PF03639(Glycosyl hydrolase family 81 )	AT5G15870	glycosyl hydrolase family 81 protein
Medtr7g090520	4.19387	1.85455	2.2614	0.0237343	0.0406314	PF03171(2OG-Fe(II) oxygenase superfamily)	AT1G52800	2-oxoglutarate (2OG) and Fe(II)-dependent oxygenase superfamily protein
Medtr5g010635	4.19217	0.260799	16.0743	3.86199e-58	9.00589e-57	PF00314(Thaumatin family)	AT4G11650	osmotin 34
Medtr2g021590	4.18749	1.24608	3.36054	0.000777915	0.00167648	PF00646(F-box domain)	AT2G23160	F-box family protein
Medtr4g086710	4.18672	1.43002	2.92775	0.0034143	0.00675877	PF02298(Plastocyanin-like domain)	AT2G15780	Cupredoxin superfamily protein
Medtr1g116410	4.18649	1.44878	2.88967	0.00385649	0.00757485
Medtr3g095190	4.18475	0.598201	6.99556	2.64207e-12	1.11075e-11	PF00847(AP2 domain)	AT5G61890	Integrase-type DNA-binding superfamily protein
Medtr7g074870	4.18067	0.254346	16.4369	1.04065e-60	2.624e-59	PF01370(NAD dependent epimerase/dehydratase family)	AT2G45400	NAD(P)-binding Rossmann-fold superfamily protein
Medtr6g088450	4.18021	0.368585	11.3413	8.19623e-30	7.48902e-29	PF00083(Sugar (and other) transporter)	AT3G18830	polyol/monosaccharide transporter 5
Medtr4g485550	4.17831	0.386071	10.8226	2.68901e-27	2.22766e-26		AT4G06744	Leucine-rich repeat (LRR) family protein
MT4Noble_031927	4.17802	0.692859	6.03012	1.63841e-09	5.78547e-09
Medtr8g068110	4.17782	0.379757	11.0013	3.76721e-28	3.22939e-27	PF06045(Rhamnogalacturonate lyase family)	AT2G22620	Rhamnogalacturonate lyase family protein
Medtr2g023760	4.1715	0.621606	6.71085	1.93491e-11	7.7273e-11		AT4G22030	F-box family protein with a domain of unknown function (DUF295)
Medtr4g066250	4.16934	1.60891	2.59141	0.00955841	0.0176011
MT4Noble_022321	4.16247	1.3381	3.11074	0.00186621	0.00382879
Medtr3g086880	4.15868	0.628898	6.61265	3.77505e-11	1.48338e-10	PF01764(Lipase (class 3))	AT5G67050	alpha/beta-Hydrolases superfamily protein
Medtr5g071560	4.15533	0.199597	20.8186	2.93496e-96	1.82461e-94	PF00069(Protein kinase domain)	AT2G30040	mitogen-activated protein kinase kinase kinase 14
Medtr5g014150	4.14777	0.371415	11.1675	5.88122e-29	5.21197e-28	PF00854(POT family)	AT1G32450	nitrate transporter 1.5
Medtr7g083410	4.14449	0.291625	14.2117	7.75046e-46	1.25249e-44	PF03009(Glycerophosphoryl diester phosphodiesterase family)	AT3G02040	senescence-related gene 3
Medtr4g058760	4.14239	0.705688	5.87	4.35807e-09	1.49694e-08	PF00535(Glycosyl transferase family 2)	AT5G60700	glycosyltransferase family protein 2
Medtr8g092290	4.14091	0.662155	6.25369	4.0087e-10	1.47324e-09	PF00069(Protein kinase domain)	AT1G53050	Protein kinase superfamily protein
Medtr1g062370	4.14045	1.55241	2.66711	0.00765061	0.0143091	PF00314(Thaumatin family)	AT1G20030	Pathogenesis-related thaumatin superfamily protein
Medtr1g054990	4.13632	0.222875	18.5589	6.91038e-77	2.69739e-75		AT3G11690
Medtr6g477860	4.13627	0.151308	27.3367	1.5523e-164	3.22142e-162		AT1G18330	Homeodomain-like superfamily protein
Medtr4g021470	4.13319	0.135575	30.4865	3.94011e-204	1.5359e-201	PF02780(Transketolase, C-terminal domain), PF02779(Transketolase, pyrimidine binding domain)	AT1G55510	branched-chain alpha-keto acid decarboxylase E1 beta subunit
Medtr3g101260	4.12948	0.409067	10.0949	5.82055e-24	4.21541e-23	PF02298(Plastocyanin-like domain)	AT2G15780	Cupredoxin superfamily protein
Medtr2g025760	4.12916	1.01178	4.08107	4.48281e-05	0.000111832		AT4G22370
Medtr5g012860	4.12332	0.823275	5.00844	5.48734e-07	1.6248e-06
Medtr3g087110	4.11732	1.68681	2.4409	0.0146507	0.0261535
Medtr4g085890	4.11612	0.168116	24.4837	2.20132e-132	2.7021e-130	PF01039(Carboxyl transferase domain)	AT4G34030	3-methylcrotonyl-CoA carboxylase
Medtr2g013780	4.11425	0.241502	17.0361	4.4344e-65	1.24431e-63	PF04720(PDDEXK-like family of unknown function)	AT4G32480	Protein of unknown function (DUF506)
Medtr3g118370	4.10907	0.902358	4.5537	5.27095e-06	1.43156e-05
Medtr5g015020	4.10815	1.45166	2.82997	0.00465529	0.00901373	PF00155(Aminotransferase class I and II)	AT4G37770	1-amino-cyclopropane-1-carboxylate synthase 8
Medtr5g006300	4.10607	1.06707	3.84799	0.000119093	0.000283889	PF01975(Survival protein SurE)	AT4G14930	Survival protein SurE-like phosphatase/nucleotidase
Medtr2g101120	4.10425	0.361624	11.3495	7.45948e-30	6.8375e-29		AT1G52140
Medtr0078s0060	4.10415	0.296784	13.8287	1.70983e-43	2.54761e-42	PF00201(UDP-glucoronosyl and UDP-glucosyl transferase)	AT4G01070	UDP-Glycosyltransferase superfamily protein
Medtr8g064760	4.09933	0.771481	5.31358	1.07494e-07	3.35473e-07		AT1G23530
Medtr2g031520	4.09857	0.451854	9.07055	1.18413e-19	7.17742e-19	PF00069(Protein kinase domain)	AT1G16260	Wall-associated kinase family protein
Medtr2g078990	4.09722	0.188109	21.7811	3.50265e-105	2.62435e-103	PF01554(MatE)	AT3G23560	MATE efflux family protein
Medtr1g078050	4.08634	0.446282	9.15641	5.36522e-20	3.29989e-19		AT1G10390	Nucleoporin autopeptidase
Medtr1g013580	4.0836	0.689698	5.92085	3.20276e-09	1.11028e-08	PF00646(F-box domain)	AT1G13570	F-box/RNI-like superfamily protein
Medtr8g063280	4.08345	1.04758	3.89798	9.69978e-05	0.000233868	PF00067(Cytochrome P450)	AT1G64940	cytochrome P450, family 87, subfamily A, polypeptide 6
Medtr5g013130	4.07658	0.704271	5.78836	7.10764e-09	2.40698e-08	PF00069(Protein kinase domain), PF01453(D-mannose binding lectin)	AT5G60900	receptor-like protein kinase 1
Medtr4g071060	4.07492	0.291827	13.9635	2.60503e-44	3.98858e-43	PF00112(Papain family cysteine protease), PF08246(Cathepsin propeptide inhibitor domain (I29))	AT2G21430	Papain family cysteine protease
Medtr2g094040	4.07296	1.75053	2.3267	0.0199813	0.0347321		AT1G72175	RING/U-box protein with domain of unknown function (DUF 1232)
Medtr4g060890	4.0619	0.563788	7.20465	5.8194e-13	2.53192e-12
Medtr1g020090	4.05941	0.46116	8.80261	1.33668e-18	7.70693e-18	PF00450(Serine carboxypeptidase)	AT3G63470	serine carboxypeptidase-like 40
Medtr5g086020	4.05908	1.47784	2.74663	0.00602104	0.0114476	PF00011(Hsp20/alpha crystallin family)	AT2G27140	HSP20-like chaperones superfamily protein
Medtr7g052280	4.05839	1.80664	2.24637	0.02468	0.0420955		AT1G51570	Calcium-dependent lipid-binding (CaLB domain) plant phosphoribosyltransferase family protein
Medtr5g015190	4.05595	0.839212	4.83305	1.3446e-06	3.84545e-06	PF05678(VQ motif)	AT2G22880	VQ motif-containing protein
Medtr3g021430	4.05372	0.473491	8.56134	1.1156e-17	6.16724e-17	PF00891(O-methyltransferase), PF08100(Dimerisation domain)	AT5G54160	O-methyltransferase 1
Medtr1g067000	4.05338	0.216605	18.7133	3.85738e-78	1.56278e-76	PF00249(Myb-like DNA-binding domain)	AT3G09600	Homeodomain-like superfamily protein
Medtr4g051515	4.05328	0.482261	8.40475	4.28777e-17	2.30541e-16	PF04564(U-box domain)	AT3G11840	plant U-box 24
Medtr5g464810	4.05202	0.222246	18.2321	2.86883e-74	1.0462e-72	PF00201(UDP-glucoronosyl and UDP-glucosyl transferase)	AT1G22360	UDP-glucosyl transferase 85A2
Medtr5g014860	4.05137	1.52772	2.6519	0.00800391	0.0149193
Medtr1g087330	4.04694	0.463264	8.73572	2.42098e-18	1.37662e-17	PF01764(Lipase (class 3))	AT1G02660	alpha/beta-Hydrolases superfamily protein
Medtr1g106730	4.04597	0.364068	11.1132	1.08213e-28	9.48214e-28		AT1G27730	salt tolerance zinc finger
Medtr4g012540	4.04494	1.44409	2.80103	0.00509391	0.00980181	PF03398(Regulator of Vps4 activity in the MVB pathway)	AT1G79910	Regulator of Vps4 activity in the MVB pathway protein
Medtr7g090820	4.04407	0.493246	8.1989	2.42593e-16	1.25477e-15	PF00154(recA bacterial DNA recombination protein)	AT5G03990
Medtr2g098060	4.04338	1.40353	2.88087	0.00396575	0.00777306
Medtr2g015750	4.04088	0.367183	11.0051	3.61111e-28	3.09926e-27
Medtr2g019370	4.03995	0.546615	7.39085	1.45896e-13	6.56751e-13	PF03171(2OG-Fe(II) oxygenase superfamily)	AT1G30040	gibberellin 2-oxidase
Medtr4g063040	4.03591	1.39246	2.89841	0.0037506	0.00737994	PF08449(UAA transporter family)	AT5G59740	UDP-N-acetylglucosamine (UAA) transporter family
Medtr1g054650	4.03469	1.51229	2.66794	0.00763181	0.0142767
MT4Noble_031216	4.03201	1.58323	2.5467	0.0108747	0.0198408
Medtr5g064240	4.03137	0.222932	18.0834	4.30684e-73	1.53187e-71	PF00201(UDP-glucoronosyl and UDP-glucosyl transferase)	AT1G22360	UDP-glucosyl transferase 85A2
Medtr3g111020	4.0304	1.74971	2.30347	0.0212523	0.0367312	PF01554(MatE)	AT1G58340	MATE efflux family protein
Medtr1g076930	4.02978	0.671003	6.00561	1.90612e-09	6.69473e-09	PF00891(O-methyltransferase), PF08100(Dimerisation domain)	AT4G35160	O-methyltransferase family protein
Medtr4g120130	4.02888	0.152884	26.3526	4.79597e-153	8.28411e-151	PF00725(3-hydroxyacyl-CoA dehydrogenase, C-terminal domain), PF02737(3-hydroxyacyl-CoA dehydrogenase, NAD binding domain), PF00378(Enoyl-CoA hydratase/isomerase)	AT3G06860	multifunctional protein 2
Medtr1g029500	4.02887	0.200489	20.0952	8.1299e-90	4.36714e-88		AT1G21410	F-box/RNI-like superfamily protein
Medtr6g084640	4.02816	0.275876	14.6013	2.75456e-48	4.7953e-47	PF00257(Dehydrin)	AT1G20440	cold-regulated 47
Medtr1g112460	4.02582	1.79844	2.23851	0.025188	0.0428909	PF03143(Elongation factor Tu C-terminal domain)	AT5G60390	GTP binding Elongation factor Tu family protein
Medtr5g020900	4.02405	1.07113	3.75684	0.000172072	0.000402041		AT5G66440
Medtr0113s0040	4.02399	0.311745	12.908	4.0586e-38	5.0463e-37	PF00646(F-box domain)	AT3G61060	phloem protein 2-A13
Medtr4g101280	4.02237	1.06587	3.77378	0.000160796	0.000377068	PF00234(Protease inhibitor/seed storage/LTP family)	AT4G12520	Bifunctional inhibitor/lipid-transfer protein/seed storage 2S albumin superfamily protein
Medtr5g006950	4.02185	1.09643	3.66815	0.000244313	0.000560836	PF00234(Protease inhibitor/seed storage/LTP family)	AT3G22600	Bifunctional inhibitor/lipid-transfer protein/seed storage 2S albumin superfamily protein
Medtr4g072330	4.02069	0.659096	6.1003	1.0587e-09	3.78711e-09	PF02519(Auxin responsive protein)	AT4G38840	SAUR-like auxin-responsive protein family
Medtr1g072420	4.01733	0.608687	6.59999	4.11187e-11	1.612e-10		AT1G03220	Eukaryotic aspartyl protease family protein
Medtr2g023770	4.01608	0.786862	5.10392	3.32698e-07	1.00251e-06		AT4G22030	F-box family protein with a domain of unknown function (DUF295)
Medtr8g079050	4.01299	1.59711	2.51266	0.0119825	0.0217102	PF00657(GDSL-like Lipase/Acylhydrolase)	AT2G23540	GDSL-like Lipase/Acylhydrolase superfamily protein
Medtr2g034480	4.01289	0.351679	11.4107	3.69852e-30	3.43157e-29	PF00332(Glycosyl hydrolases family 17)	AT4G16260	Glycosyl hydrolase superfamily protein
Medtr4g086040	4.00924	0.91754	4.36956	1.24498e-05	3.27193e-05	PF00067(Cytochrome P450)	AT3G19270	cytochrome P450, family 707, subfamily A, polypeptide 4
Medtr2g033170	4.00877	0.342632	11.6999	1.27564e-31	1.25845e-30	PF00249(Myb-like DNA-binding domain)	AT5G49620	myb domain protein 78
Medtr5g038460	4.00338	0.317047	12.6271	1.49728e-36	1.77083e-35		AT1G07040
Medtr2g075530	4.00179	1.78804	2.23808	0.0252156	0.0429304
Medtr7g029290	3.99417	0.437757	9.12418	7.22818e-20	4.41933e-19	PF01344(Kelch motif)	AT3G27150	Galactose oxidase/kelch repeat superfamily protein
Medtr8g102550	3.99264	0.287444	13.8901	7.2687e-44	1.09834e-42	PF00481(Protein phosphatase 2C)	AT4G26080	Protein phosphatase 2C family protein
Medtr8g087720	3.99138	1.29524	3.08156	0.00205916	0.00419837	PF00230(Major intrinsic protein)	AT4G18910	NOD26-like intrinsic protein 1;2
Medtr6g079540	3.98806	0.273321	14.5911	3.20002e-48	5.55299e-47	PF07714(Protein tyrosine kinase)	AT1G18160	Protein kinase superfamily protein
Medtr4g021520	3.98495	0.290735	13.7065	9.28855e-43	1.34777e-41	PF00450(Serine carboxypeptidase)	AT5G09640	serine carboxypeptidase-like 19
MT4Noble_022320	3.98287	0.964104	4.13116	3.60935e-05	9.08431e-05
Medtr4g089025	3.97657	0.205987	19.305	4.8743e-83	2.23181e-81	PF00067(Cytochrome P450)	AT3G48270	cytochrome P450, family 71, subfamily A, polypeptide 26
Medtr6g005630	3.97173	1.10999	3.57816	0.000346016	0.00078045	PF00295(Glycosyl hydrolases family 28)	AT5G14650	Pectin lyase-like superfamily protein
Medtr4g015600	3.97087	0.288903	13.7446	5.48407e-43	8.0342e-42		AT3G47160	RING/U-box superfamily protein
Medtr4g063090	3.96813	0.377293	10.5174	7.18535e-26	5.6369e-25	PF00230(Major intrinsic protein)	AT2G36830	gamma tonoplast intrinsic protein
Medtr3g087275	3.96746	1.62194	2.44612	0.0144403	0.0258035	PF00168(C2 domain)	AT5G10210
Medtr8g068390	3.96732	0.839126	4.72791	2.26839e-06	6.3596e-06	PF00069(Protein kinase domain)	AT5G65530	Protein kinase superfamily protein
Medtr3g111730	3.96629	0.147354	26.9167	1.40135e-159	2.67705e-157		AT1G45150
Medtr8g105190	3.96318	0.330449	11.9933	3.85148e-33	4.04294e-32		AT1G67920
Medtr2g090755	3.95944	0.323009	12.258	1.52192e-34	1.67819e-33	PF00462(Glutaredoxin)	AT1G28480	Thioredoxin superfamily protein
Medtr5g066760	3.95527	0.345125	11.4604	2.08549e-30	1.95255e-29		AT2G38465
Medtr5g013070	3.9542	0.334091	11.8357	2.55263e-32	2.59912e-31	PF00069(Protein kinase domain), PF01453(D-mannose binding lectin)	AT5G60900	receptor-like protein kinase 1
Medtr5g054300	3.94923	0.879384	4.4909	7.09236e-06	1.90543e-05	PF00249(Myb-like DNA-binding domain)	AT1G25550	myb-like transcription factor family protein
Medtr6g080430	3.94801	0.239232	16.5029	3.499e-61	8.93997e-60		AT1G42550	plastid movement impaired1
Medtr3g094120	3.94262	1.23057	3.2039	0.00135581	0.00283178
Medtr2g079430	3.94036	0.365434	10.7827	4.15604e-27	3.41845e-26	PF00304(Gamma-thionin family)	AT1G61070	low-molecular-weight cysteine-rich 66
Medtr4g021800	3.93978	0.378566	10.4071	2.30075e-25	1.76932e-24		AT5G02230	Haloacid dehalogenase-like hydrolase (HAD) superfamily protein
Medtr0056s0160	3.93594	0.476107	8.26692	1.3746e-16	7.19763e-16	PF03171(2OG-Fe(II) oxygenase superfamily)	AT1G17020	senescence-related gene 1
Medtr3g008370	3.92928	1.38741	2.83209	0.00462453	0.00895957	PF00421(Photosystem II protein)	ATCG00280	photosystem II reaction center protein C
Medtr4g072805	3.92721	1.1367	3.45493	0.000550439	0.00121012
Medtr3g084990	3.92598	0.286048	13.7249	7.20315e-43	1.051e-41		AT1G27290
Medtr5g035690	3.92594	0.35808	10.9639	5.70114e-28	4.84832e-27	PF06880(Protein of unknown function (DUF1262))	AT1G13480	Protein of unknown function (DUF1262)
Medtr8g042770	3.92189	0.393607	9.96399	2.19086e-23	1.54706e-22	PF07690(Major Facilitator Superfamily)	AT5G13750	zinc induced facilitator-like 1
Medtr7g005930	3.92158	1.25506	3.12462	0.00178032	0.00366194	PF00854(POT family)	AT5G19640	Major facilitator superfamily protein
Medtr4g085800	3.91665	1.35902	2.88195	0.00395217	0.0077475		AT4G36945	PLC-like phosphodiesterases superfamily protein
Medtr5g073020	3.91495	0.43677	8.96341	3.14776e-19	1.8687e-18	PF00067(Cytochrome P450)	AT4G31500	cytochrome P450, family 83, subfamily B, polypeptide 1
Medtr7g096880	3.90887	1.6966	2.30394	0.021226	0.0366924	PF00083(Sugar (and other) transporter)	AT3G54700	phosphate transporter 1;7
Medtr5g019010	3.90356	0.629204	6.20396	5.50593e-10	2.00637e-09	PF00067(Cytochrome P450)	AT3G26300	cytochrome P450, family 71, subfamily B, polypeptide 34
Medtr3g025230	3.90118	0.325176	11.9971	3.67834e-33	3.86399e-32	PF00067(Cytochrome P450)	AT5G07990	Cytochrome P450 superfamily protein
Medtr1g022970	3.90076	1.47796	2.63929	0.00830803	0.0154496	PF00141(Peroxidase)	AT1G44970	Peroxidase superfamily protein
MT4Noble_049083	3.89712	0.538378	7.23863	4.53245e-13	1.98637e-12
Medtr8g069955	3.89652	0.320741	12.1485	5.84398e-34	6.29482e-33	PF03105(SPX domain), PF03124(EXS family)	AT1G68740	EXS (ERD1/XPR1/SYG1) family protein
Medtr3g466610	3.89597	1.53601	2.53643	0.011199	0.0203815
Medtr2g015690	3.89504	0.673869	5.78012	7.46469e-09	2.52322e-08	PF01764(Lipase (class 3))	AT4G18550	alpha/beta-Hydrolases superfamily protein
Medtr7g027960	3.89366	0.314987	12.3613	4.23079e-35	4.75239e-34	PF00067(Cytochrome P450)	AT5G06900	cytochrome P450, family 93, subfamily D, polypeptide 1
Medtr7g446220	3.89348	0.54847	7.0988	1.25845e-12	5.38514e-12
Medtr1g070350	3.89069	0.44494	8.74431	2.2439e-18	1.27869e-17	PF04576(Zein-binding)	AT2G30690	Protein of unknown function, DUF593
Medtr3g009400	3.89013	0.332628	11.6951	1.35005e-31	1.33004e-30	PF00069(Protein kinase domain), PF00560(Leucine Rich Repeat), PF08263(Leucine rich repeat N-terminal domain)	AT1G55610	BRI1 like
Medtr6g079430	3.88598	1.53725	2.52788	0.0114753	0.0208554	PF01535(PPR repeat)	AT1G62670	rna processing factor 2
Medtr4g087970	3.88474	0.804235	4.83035	1.36294e-06	3.89414e-06	PF01095(Pectinesterase), PF04043(Plant invertase/pectin methylesterase inhibitor)	AT3G43270	Plant invertase/pectin methylesterase inhibitor superfamily
Medtr4g102220	3.88445	0.2319	16.7506	5.60853e-63	1.50356e-61	PF07279(Protein of unknown function (DUF1442))	AT2G45360	Protein of unknown function (DUF1442)
Medtr5g041530	3.88108	0.370904	10.4638	1.26606e-25	9.83858e-25	PF02701(Dof domain, zinc finger)	AT3G47500	cycling DOF factor 3
Medtr1g071720	3.87884	1.68616	2.3004	0.0214254	0.0370172	PF00234(Protease inhibitor/seed storage/LTP family)	AT2G48140	Bifunctional inhibitor/lipid-transfer protein/seed storage 2S albumin superfamily protein
Medtr2g035480	3.87829	0.275967	14.0534	7.33822e-45	1.14297e-43	PF03473(MOSC domain)	AT1G30910	Molybdenum cofactor sulfurase family protein
Medtr4g085900	3.87615	0.109628	35.3573	7.73127e-274	8.57755e-271	PF01965(DJ-1/PfpI family)	AT4G34020	Class I glutamine amidotransferase-like superfamily protein
Medtr8g095360	3.87416	1.36549	2.83719	0.00455131	0.00883434	PF03765(CRAL/TRIO, N-terminal domain), PF00650(CRAL/TRIO domain)	AT4G09160	SEC14 cytosolic factor family protein / phosphoglyceride transfer family protein
MT4Noble_029011	3.87018	0.333067	11.6198	3.26763e-31	3.16408e-30
Medtr5g010150	3.8691	0.51025	7.58275	3.38315e-14	1.57454e-13	PF00230(Major intrinsic protein)	AT4G00430	plasma membrane intrinsic protein 1;4
Medtr6g069660	3.86873	0.140181	27.5981	1.17303e-167	2.50646e-165	PF07005(Putative sugar-binding N-terminal domain), PF01116(Fructose-bisphosphate aldolase class-II)	AT1G18270	ketose-bisphosphate aldolase class-II family protein
Medtr1g037130	3.86831	0.534475	7.2376	4.56693e-13	2.00088e-12	PF00931(NB-ARC domain)	AT4G27190	NB-ARC domain-containing disease resistance protein
Medtr3g106290	3.86766	1.42511	2.71394	0.00664873	0.0125607	PF00847(AP2 domain)	AT5G25190	Integrase-type DNA-binding superfamily protein
Medtr4g123750	3.86695	1.46412	2.64114	0.0082627	0.0153702	PF00917(MATH domain)	AT3G17380	TRAF-like family protein
Medtr5g067460	3.86682	0.437101	8.84652	9.0292e-19	5.23846e-18	PF01554(MatE)	AT1G58340	MATE efflux family protein
Medtr5g006940	3.86516	1.61285	2.39647	0.0165537	0.0292607	PF00234(Protease inhibitor/seed storage/LTP family)	AT1G05450	Bifunctional inhibitor/lipid-transfer protein/seed storage 2S albumin superfamily protein
MT4Noble_004136	3.86507	1.04181	3.70995	0.0002073	0.000480227
Medtr8g086020	3.86441	0.238795	16.1829	6.65386e-59	1.58757e-57	PF00170(bZIP transcription factor)	AT1G75390	basic leucine-zipper 44
Medtr8g079120	3.85724	0.219575	17.5668	4.42255e-69	1.39729e-67	PF00561(alpha/beta hydrolase fold)	AT2G23620	methyl esterase 1
Medtr7g078290	3.85417	1.72677	2.23201	0.0256143	0.0435397		AT3G57890	Tubulin binding cofactor C domain-containing protein
Medtr6g069685	3.84784	0.122711	31.357	7.8023e-216	3.63008e-213	PF03446(NAD binding domain of 6-phosphogluconate dehydrogenase)	AT1G18270	ketose-bisphosphate aldolase class-II family protein
Medtr6g092660	3.84623	0.210475	18.2741	1.33128e-74	4.91077e-73	PF08211(Cytidine and deoxycytidylate deaminase zinc-binding region ), PF00383(Cytidine and deoxycytidylate deaminase zinc-binding region)	AT2G19570	cytidine deaminase 1
Medtr5g065960	3.84389	0.583764	6.58467	4.5591e-11	1.78249e-10	PF00169(PH domain), PF00620(RhoGAP domain)	AT4G24580	Rho GTPase activation protein (RhoGAP) with PH domain
MT4Noble_019227	3.84214	1.40537	2.73391	0.00625872	0.011876
Medtr3g088460	3.84076	0.964783	3.98096	6.86373e-05	0.000168031	PF01566(Natural resistance-associated macrophage protein)	AT1G15960	NRAMP metal ion transporter 6
Medtr7g088035	3.83821	0.566682	6.77313	1.26028e-11	5.09017e-11	PF00656(Caspase domain)	AT5G04200	metacaspase 9
MT4Noble_012197	3.83798	1.15967	3.30955	0.000934446	0.00199077
Medtr4g120220	3.83651	0.187241	20.4897	2.65953e-93	1.5436e-91	PF00198(2-oxoacid dehydrogenases acyltransferase (catalytic domain)), PF00364(Biotin-requiring enzyme), PF02817(e3 binding domain)	AT3G06850	2-oxoacid dehydrogenases acyltransferase family protein
Medtr3g087590	3.83275	0.135027	28.3851	3.08709e-177	7.67674e-175	PF07994(Myo-inositol-1-phosphate synthase), PF01658(Myo-inositol-1-phosphate synthase)	AT2G22240	myo-inositol-1-phosphate synthase 2
Medtr8g464440	3.83137	1.49323	2.56582	0.0102933	0.0188652	PF00069(Protein kinase domain)	AT3G48750	cell division control 2
Medtr3g114260	3.8277	0.655695	5.83762	5.29522e-09	1.80764e-08	PF02919(Eukaryotic DNA topoisomerase I, DNA binding fragment), PF01028(Eukaryotic DNA topoisomerase I, catalytic core)	AT5G55310	DNA topoisomerase 1 beta
Medtr4g086740	3.82654	0.422964	9.04695	1.47013e-19	8.87184e-19	PF02298(Plastocyanin-like domain)	AT2G15780	Cupredoxin superfamily protein
Medtr5g090650	3.82627	1.23847	3.08952	0.00200477	0.00409529		AT3G21760	UDP-Glycosyltransferase superfamily protein
Medtr3g079320	3.82473	0.719105	5.31873	1.04494e-07	3.2632e-07	PF00106(short chain dehydrogenase)	AT3G61220	NAD(P)-binding Rossmann-fold superfamily protein
Medtr1g019110	3.82419	0.296541	12.896	4.74003e-38	5.8809e-37	PF00847(AP2 domain)	AT2G23340	DREB and EAR motif protein 3
Medtr8g027200	3.82032	0.394926	9.67349	3.90803e-22	2.63452e-21	PF00004(ATPase family associated with various cellular activities (AAA))	AT2G46620	P-loop containing nucleoside triphosphate hydrolases superfamily protein
Medtr5g035610	3.81989	0.459683	8.30984	9.58285e-17	5.06462e-16
Medtr5g045370	3.8179	0.408263	9.35159	8.63428e-21	5.49568e-20	PF07897(Ethylene-responsive binding factor-associated repression)	AT1G13740	ABI five binding protein 2
Medtr5g095120	3.81375	0.367405	10.3802	3.0508e-25	2.33122e-24	PF00560(Leucine Rich Repeat), PF08263(Leucine rich repeat N-terminal domain)	AT1G45616	receptor like protein 6
Medtr8g466030	3.81353	1.39314	2.73737	0.00619321	0.0117563	PF03358(NADPH-dependent FMN reductase)	AT5G54500	flavodoxin-like quinone reductase 1
Medtr1g059760	3.81088	0.193978	19.646	6.25672e-86	3.05383e-84	PF00668(Condensation domain)	AT3G52610
Medtr6g093100	3.81019	1.37971	2.76158	0.00575223	0.0109698	PF00432(Prenyltransferase and squalene oxidase repeat)	AT2G07050	cycloartenol synthase 1
Medtr4g017650	3.80798	0.562203	6.77331	1.25871e-11	5.08456e-11	PF01161(Phosphatidylethanolamine-binding protein)	AT5G01300	PEBP (phosphatidylethanolamine-binding protein) family protein
Medtr1g022190	3.80586	0.2531	15.0369	4.20584e-51	7.96075e-50		AT1G75180	Erythronate-4-phosphate dehydrogenase family protein
Medtr3g086890	3.80189	0.445355	8.53677	1.38031e-17	7.60579e-17		AT4G40020	Myosin heavy chain-related protein
Medtr6g021860	3.79832	0.330638	11.4879	1.51798e-30	1.42864e-29
Medtr4g119650	3.79406	1.59516	2.37848	0.017384	0.0305879
Medtr5g066060	3.78915	0.308779	12.2714	1.29023e-34	1.42816e-33	PF00484(Carbonic anhydrase)	AT4G33580	beta carbonic anhydrase 5
Medtr4g094918	3.78213	0.315664	11.9815	4.44114e-33	4.64668e-32	PF08246(Cathepsin propeptide inhibitor domain (I29)), PF00112(Papain family cysteine protease)	AT5G43060	Granulin repeat cysteine protease family protein
Medtr7g072270	3.77962	0.399505	9.46075	3.05735e-21	1.98185e-20	PF04525(LURP-one-related)	AT5G01750	Protein of unknown function (DUF567)
Medtr3g117290	3.77895	0.259678	14.5524	5.63791e-48	9.68618e-47	PF00257(Dehydrin)	AT1G76180	Dehydrin family protein
Medtr5g008820	3.76849	1.55823	2.41844	0.015587	0.0276862	PF00501(AMP-binding enzyme)	AT1G20560	acyl activating enzyme 1
Medtr4g011970	3.76603	0.362237	10.3966	2.56975e-25	1.97146e-24	PF00916(Sulfate permease family), PF01740(STAS domain)	AT3G15990	sulfate transporter 3;4
Medtr4g107940	3.764	0.150837	24.9541	1.92649e-137	2.57276e-135	PF00171(Aldehyde dehydrogenase family)	AT5G62530	aldehyde dehydrogenase 12A1
Medtr4g117040	3.75982	0.422341	8.90235	5.46768e-19	3.2057e-18	PF00704(Glycosyl hydrolases family 18), PF00069(Protein kinase domain)	AT3G16030	lectin protein kinase family protein
Medtr1g086510	3.75948	0.323575	11.6186	3.31618e-31	3.21002e-30	PF00249(Myb-like DNA-binding domain)	AT1G48000	myb domain protein 112
Medtr3g114460	3.75682	0.379238	9.90622	3.91179e-23	2.7355e-22	PF05055(Protein of unknown function (DUF677))	AT1G20180	Protein of unknown function (DUF677)
Medtr7g114200	3.75624	0.277068	13.5571	7.19339e-42	1.01072e-40		AT1G71080	RNA polymerase II transcription elongation factor
Medtr5g061510	3.75409	0.640975	5.85684	4.71752e-09	1.61617e-08	PF00560(Leucine Rich Repeat)	AT4G20270	Leucine-rich receptor-like protein kinase family protein
Medtr7g101250	3.7537	0.219501	17.1011	1.45745e-65	4.13796e-64	PF04520(Senescence regulator)	AT5G03230	Protein of unknown function, DUF584
Medtr8g076040	3.75281	0.243507	15.4115	1.3691e-53	2.75597e-52	PF02519(Auxin responsive protein)	AT4G34760	SAUR-like auxin-responsive protein family
Medtr5g018610	3.75191	0.339123	11.0636	1.88422e-28	1.63465e-27
Medtr1g085070	3.75126	0.140042	26.7867	4.62127e-158	8.65619e-156	PF03283(Pectinacetylesterase)	AT3G05910	Pectinacetylesterase family protein
Medtr5g072980	3.74693	0.193654	19.3486	2.09634e-83	9.69088e-82	PF00067(Cytochrome P450)	AT4G31500	cytochrome P450, family 83, subfamily B, polypeptide 1
Medtr7g063540	3.7383	0.340346	10.9838	4.57208e-28	3.90427e-27
Medtr6g488290	3.73733	0.389075	9.60569	7.56509e-22	5.03281e-21		AT4G29060	elongation factor Ts family protein
Medtr8g088250	3.73421	0.745513	5.00892	5.4737e-07	1.62109e-06	PF00644(Poly(ADP-ribose) polymerase catalytic domain), PF12174(RCD1-SRO-TAF4 (RST) plant domain)	AT1G23550	similar to RCD one 2
Medtr4g093820	3.73385	0.460044	8.11629	4.80668e-16	2.44971e-15		AT2G14095
Medtr3g115170	3.73156	0.522086	7.1474	8.84393e-13	3.81276e-12		AT5G42290	transcription activator-related
Medtr4g098870	3.7314	0.15684	23.7912	4.12225e-125	4.52131e-123	PF00072(Response regulator receiver domain), PF00249(Myb-like DNA-binding domain)	AT4G18020	CheY-like two-component responsive regulator family protein
Medtr4g104640	3.72989	0.282052	13.2241	6.36844e-40	8.37302e-39	PF00067(Cytochrome P450)	AT3G26330	cytochrome P450, family 71, subfamily B, polypeptide 37
Medtr2g034720	3.72951	0.237655	15.693	1.68946e-55	3.63417e-54	PF00933(Glycosyl hydrolase family 3 N terminal domain), PF01915(Glycosyl hydrolase family 3 C-terminal domain)	AT5G49360	beta-xylosidase 1
Medtr8g078960	3.71778	0.574112	6.47571	9.43695e-11	3.61176e-10
Medtr8g059170	3.71737	0.583524	6.37056	1.88341e-10	7.06947e-10	PF02365(No apical meristem (NAM) protein)	AT4G27410	NAC (No Apical Meristem) domain transcriptional regulator superfamily protein
Medtr1g073180	3.71387	0.199694	18.5978	3.34967e-77	1.32181e-75	PF00501(AMP-binding enzyme)	AT5G63380	AMP-dependent synthetase and ligase family protein
Medtr8g445330	3.71248	1.46165	2.53993	0.0110875	0.020194	PF03936(Terpene synthase family, metal binding domain)	AT4G02780	Terpenoid cyclases/Protein prenyltransferases superfamily protein
Medtr3g088150	3.71212	0.241091	15.3971	1.711e-53	3.43701e-52	PF00171(Aldehyde dehydrogenase family)	AT1G44170	aldehyde dehydrogenase 3H1
Medtr6g452990	3.71158	0.310681	11.9466	6.7654e-33	7.03768e-32	PF00183(Hsp90 protein), PF02518(Histidine kinase-, DNA gyrase B-, and HSP90-like ATPase)	AT5G52640	heat shock protein 90.1
Medtr8g099320	3.71133	0.2139	17.3508	1.94682e-67	5.862e-66	PF01490(Transmembrane amino acid transporter protein)	AT5G41800	Transmembrane amino acid transporter family protein
MT4Noble_035292	3.70764	1.34587	2.75483	0.00587224	0.0111816
Medtr8g036075	3.70452	0.401118	9.2355	2.57082e-20	1.60203e-19	PF00036(EF hand)	AT1G24620	EF hand calcium-binding protein family
Medtr6g027710	3.70452	1.23372	3.00272	0.0026758	0.00537172	PF03195(Protein of unknown function DUF260)	AT3G03760	LOB domain-containing protein 20
MT4Noble_038353	3.70415	0.628437	5.89423	3.76444e-09	1.29876e-08
Medtr1g041615	3.70156	1.56627	2.36329	0.0181135	0.0317688	PF00319(SRF-type transcription factor (DNA-binding and dimerisation domain))	AT5G13790	AGAMOUS-like 15
Medtr5g076060	3.6984	0.20416	18.1152	2.41838e-73	8.64444e-72	PF04678(Mitochondrial calcium uniporter)	AT1G57610	Protein of unknown function (DUF607)
Medtr1g080080	3.69677	1.5073	2.45258	0.0141835	0.0253823		AT5G05800
MT4Noble_026416	3.69313	1.43748	2.56916	0.0101946	0.0186974
Medtr5g016450	3.6913	0.244446	15.1007	1.60303e-51	3.06842e-50		AT4G37300	maternal effect embryo arrest 59
Medtr1g009180	3.69047	0.586623	6.29105	3.15332e-10	1.16646e-09	PF09258(Glycosyl transferase family 64 domain)	AT1G80290	Nucleotide-diphospho-sugar transferases superfamily protein
Medtr8g089740	3.68943	0.321502	11.4756	1.7498e-30	1.64306e-29	PF02065(Melibiase)	AT3G26380	Melibiase family protein
Medtr7g110110	3.68915	1.66852	2.21103	0.0270334	0.0457525
Medtr0144s0060	3.68842	1.60491	2.29821	0.0215497	0.0372141	PF00931(NB-ARC domain)	AT3G14470	NB-ARC domain-containing disease resistance protein
Medtr5g043280	3.68688	0.1661	22.1967	3.69611e-109	3.02034e-107
Medtr7g011390	3.68607	0.566847	6.50275	7.88638e-11	3.03644e-10
Medtr8g071900	3.68601	0.792599	4.65054	3.31061e-06	9.15304e-06	PF00534(Glycosyl transferases group 1)	AT4G19460	UDP-Glycosyltransferase superfamily protein
Medtr3g057970	3.68585	1.20414	3.06097	0.00220622	0.00448016	PF00067(Cytochrome P450)	AT3G26300	cytochrome P450, family 71, subfamily B, polypeptide 34
Medtr2g451510	3.6858	0.247145	14.9135	2.69132e-50	4.95745e-49	PF03662(Glycosyl hydrolase family 79, N-terminal domain )	AT5G34940	glucuronidase 3
Medtr8g074320	3.68441	1.32685	2.7768	0.00548966	0.0105072	PF03088(Strictosidine synthase)	AT3G51420	strictosidine synthase-like 4
Medtr4g093070	3.68414	0.561665	6.55931	5.40572e-11	2.10379e-10	PF00069(Protein kinase domain), PF00139(Legume lectin domain)	AT5G10530	Concanavalin A-like lectin protein kinase family protein
Medtr2g105000	3.68128	0.755179	4.87472	1.08965e-06	3.14162e-06
Medtr8g023130	3.68071	1.5495	2.37542	0.0175288	0.0308296	PF03763(Remorin, C-terminal region )	AT1G53860	Remorin family protein
Medtr7g112420	3.672	0.313674	11.7064	1.18153e-31	1.16721e-30	PF00225(Kinesin motor domain)	AT5G27000	kinesin 4
Medtr2g022560	3.67147	0.322198	11.395	4.42601e-30	4.09308e-29	PF03005()	AT3G06080	Plant protein of unknown function (DUF828)
Medtr3g465440	3.67142	1.06768	3.4387	0.000584511	0.00128054	PF01490(Transmembrane amino acid transporter protein)	AT3G28960	Transmembrane amino acid transporter family protein
Medtr2g094190	3.6714	1.48494	2.47243	0.0134199	0.024122
Medtr4g478130	3.66632	0.224187	16.3538	4.08346e-60	1.01109e-58	PF00407(Pathogenesis-related protein Bet v I family)
Medtr7g117415	3.66235	0.157437	23.2623	1.06885e-119	1.04516e-117	PF03145(Seven in absentia protein family)	AT3G61790	Protein with RING/U-box and TRAF-like domains
Medtr6g021730	3.65809	0.231495	15.802	3.01349e-56	6.6509e-55	PF07002(Copine)	AT5G14420	RING domain ligase2
Medtr6g046930	3.65349	0.328522	11.121	9.9183e-29	8.70673e-28	PF05630(Necrosis inducing protein (NPP1)), PF00931(NB-ARC domain)	AT3G14470	NB-ARC domain-containing disease resistance protein
Medtr4g101630	3.65028	0.239547	15.2383	1.97053e-52	3.85369e-51	PF08244(Glycosyl hydrolases family 32 C terminal), PF00251(Glycosyl hydrolases family 32 N-terminal domain)	AT1G12240	Glycosyl hydrolases family 32 protein
Medtr7g073520	3.64587	0.150366	24.2467	7.17243e-130	8.5849e-128	PF00433(Protein kinase C terminal domain), PF00069(Protein kinase domain)	AT3G08720	serine/threonine protein kinase 2
Medtr3g051220	3.6458	0.401974	9.06975	1.19286e-19	7.22728e-19	PF10520(B domain of TMEM189, localisation domain)	AT4G27030	fatty acid desaturase A
Medtr7g118330	3.64204	0.22936	15.8791	8.84228e-57	1.98494e-55	PF00249(Myb-like DNA-binding domain)	AT1G01060	Homeodomain-like superfamily protein
Medtr5g076960	3.64187	0.265527	13.7156	8.18478e-43	1.19181e-41		AT5G17300	Homeodomain-like superfamily protein
[truncated: 9,841 more rows]

## Sheet: 3dd.0dd
Gene ID	log2FoldChange	lfcSE	stat	pvalue	padj	Gene description	Arabidopsis hit description	Annotation
[truncated: 11,907 more rows]

[truncated: 7 more sheets: All DE genes Log2FoldChange, Core DE genes Log2FoldChange, 1dd.0dd TFs, 2dd.0dd TFs, 3dd.0dd TFs, All DE TFs Log2FoldChange, Core TFs Log2FoldChange]
