# Supplementary material for: Transcriptional Programs and Regulators Underlying Age-Dependent and Dark-Induced Senescence in Medicago truncatula
Source: Cells. 2022 May 6;11(9):1570. doi: 10.3390/cells11091570 (PMC9103780; doi:10.3390/cells11091570)
Supplement: Supplementary file 1 [file cells-11-01570-s001.zip › Supplementary Dataset S6. STEM profiles with Mapman annotations of DE genes during dark-induced senescence.xlsx]

## Sheet: Combined 0-18 dark mapman
IDENTIFIER	BINCODE	NAME Mapman annotation	TYPE
Medtr6g017260	'1'	'PS'	Proteasome maturation factor UMP1 (InterPro:IPR008012); BEST Arabidopsis thaliana protein match is: Proteasome maturation factor UMP1 (TAIR:AT5G38650.1). & (ipr021275 : 124.15727) Protein of unknown function DUF2854 & (reliability: 628.0) & (original description: no original description)'
Medtr2g008610	'1.1.1.1'	'PS.lightreaction.photosystem II.LHC-II'	light harvesting complex of photosystem II.; light harvesting complex photosystem II subunit 6 (LHCB6); FUNCTIONS IN: chlorophyll binding; INVOLVED IN: photosynthesis
Medtr2g081090	'1.1.1.1'	'PS.lightreaction.photosystem II.LHC-II'	thylakoid
Medtr3g070340	'1.1.1.1'	'PS.lightreaction.photosystem II.LHC-II'	light harvesting complex of photosystem II; light harvesting complex photosystem II (LHCB4.3); CONTAINS InterPro DOMAIN/s: Chlorophyll A-B binding protein (InterPro:IPR001344); BEST Arabidopsis thaliana protein match is: light harvesting complex photosystem II (TAIR:AT3G08940.2). & (q93wd2|cb29_chlre : 247.0) Chlorophyll a-b binding protein CP29 - Chlamydomonas reinhardtii & (gnl|cdd|84819 : 159.…
Medtr4g015570	'1.1.1.1'	'PS.lightreaction.photosystem II.LHC-II'	response to red light
Medtr5g097280	'1.1.1.1'	'PS.lightreaction.photosystem II.LHC-II'	chloroplast precursor (LHCII type II CAB-215) (LHCP) - Pisum sativum (Garden pea) & (at2g05100 : 437.0) Lhcb2.1 protein encoding a subunit of the light harvesting complex II. Member of a gene family with high degree of sequence similarity. Initially LHCB2.3 was considered as a separate gene but appears to be an allele of LHCB2.1.; photosystem II light harvesting complex gene 2.1 (LHCB2.1); FUNCTI…
Medtr6g011870	'1.1.1.1'	'PS.lightreaction.photosystem II.LHC-II'	chloroplast precursor (LHCII type I CAB-AB80) (LHCP) - Pisum sativum (Garden pea) & (at1g29930 : 437.0) Subunit of light-harvesting complex II (LHCII)
Medtr6g011880	'1.1.1.1'	'PS.lightreaction.photosystem II.LHC-II'	chloroplast precursor (LHCII type I CAB-40) (LHCP) - Nicotiana tabacum (Common tobacco) & (at1g29930 : 439.0) Subunit of light-harvesting complex II (LHCII)
Medtr6g011890	'1.1.1.1'	'PS.lightreaction.photosystem II.LHC-II'	chloroplast precursor (LHCII type I CAB-AB80) (LHCP) - Pisum sativum (Garden pea) & (at1g29930 : 434.0) Subunit of light-harvesting complex II (LHCII)
Medtr6g012080	'1.1.1.1'	'PS.lightreaction.photosystem II.LHC-II'	chloroplast precursor (LHCII type I CAB-AB80) (LHCP) - Pisum sativum (Garden pea) & (at1g29930 : 436.0) Subunit of light-harvesting complex II (LHCII)
Medtr6g012110	'1.1.1.1'	'PS.lightreaction.photosystem II.LHC-II'	chloroplast precursor (LHCII type I CAB-AB80) (LHCP) - Pisum sativum (Garden pea) & (at1g29930 : 424.0) Subunit of light-harvesting complex II (LHCII)
Medtr6g060175	'1.1.1.1'	'PS.lightreaction.photosystem II.LHC-II'	response to red light
Medtr1g069465	'1.1.1.2'	'PS.lightreaction.photosystem II.PSII polypeptide subunits'	photosystem II reaction center; EXPRESSED IN: 22 plant structures; EXPRESSED DURING: 13 growth stages; CONTAINS InterPro DOMAIN/s: Photosystem II protein Psb28
Medtr1g115410	'1.1.1.2'	'PS.lightreaction.photosystem II.PSII polypeptide subunits'	chloroplast thylakoid lumen
Medtr2g062930	'1.1.1.2'	'PS.lightreaction.photosystem II.PSII polypeptide subunits'	QA and QB
Medtr2g064650	'1.1.1.2'	'PS.lightreaction.photosystem II.PSII polypeptide subunits'	chloroplast precursor (PII10) - Nicotiana tabacum (Common tobacco) & (at1g79040 : 131.0) Encodes for the 10 kDa PsbR subunit of photosystem II (PSII). This subunit appears to be involved in the stable assembly of PSII
Medtr2g082580	'1.1.1.2'	'PS.lightreaction.photosystem II.PSII polypeptide subunits'	transferring electrons within the cyclic electron transport pathway of photosynthesis activity; INVOLVED IN: photosynthesis
Medtr2g090200	'1.1.1.2'	'PS.lightreaction.photosystem II.PSII polypeptide subunits'	chloroplast thylakoid membrane
Medtr3g086230	'1.1.1.2'	'PS.lightreaction.photosystem II.PSII polypeptide subunits'	chloroplast precursor (L-arginine-metabolizing enzyme) (L-AME) [Contains: Photosystem II protein psbY-1 (psbY-A1); Photosystem II protein psbY-2 (psbY-A2)] - Spinacia oleracea (Spinach) & (at1g67740 : 104.0) PsbY precursor (psbY) mRNA. This single nuclear gene is imported into the chloroplasts where it is processed into two integral membrane proteins with identical topology (PsbY-1 and PsbY-2). T…
Medtr3g088040	'1.1.1.2'	'PS.lightreaction.photosystem II.PSII polypeptide subunits'	chloroplast precursor (CP22) - Spinacia oleracea (Spinach) & (at1g44575 : 256.0) Encoding PSII-S (CP22)
Medtr3g089890	'1.1.1.2'	'PS.lightreaction.photosystem II.PSII polypeptide subunits'	thylakoid lumen
Medtr3g108040	'1.1.1.2'	'PS.lightreaction.photosystem II.PSII polypeptide subunits'	thylakoid lumen
Medtr3g116110	'1.1.1.2'	'PS.lightreaction.photosystem II.PSII polypeptide subunits'	thylakoid lumen
Medtr3g449930	'1.1.1.2'	'PS.lightreaction.photosystem II.PSII polypeptide subunits'	chloroplast precursor (OEE2) (23 kDa subunit of oxygen evolving system of photosystem II) (OEC 23 kDa subunit) (23 kDa thylakoid membrane protein) - Pisum sativum (Garden pea) & (at1g06680 : 302.0) Encodes a 23 kD extrinsic protein that is part of photosystem II and participates in the regulation of oxygen evolution.; photosystem II subunit P-1 (PSBP-1); FUNCTIONS IN: poly(U) RNA binding; INVOLVE…
Medtr5g018670	'1.1.1.2'	'PS.lightreaction.photosystem II.PSII polypeptide subunits'	chloroplast precursor (OEE1) (33 kDa subunit of oxygen evolving system of photosystem II) (OEC 33 kDa subunit) (33 kDa thylakoid membrane protein) - Pisum sativum (Garden pea) & (at3g50820 : 459.0) Encodes a protein which is an extrinsic subunit of photosystem II and which has been proposed to play a central role in stabilization of the catalytic manganese cluster. In <i>Arabidopsis thaliana</i> …
Medtr5g041910	'1.1.1.2'	'PS.lightreaction.photosystem II.PSII polypeptide subunits'	transferring electrons within the cyclic electron transport pathway of photosynthesis activity; INVOLVED IN: photosynthetic electron transport chain; LOCATED IN: in 6 components; EXPRESSED IN: 22 plant structures; EXPRESSED DURING: 13 growth stages; CONTAINS InterPro DOMAIN/s: Photosystem II oxygen evolving complex protein PsbQ (InterPro:IPR008797); BEST Arabidopsis thaliana protein match is: Psb…
Medtr6g018710	'1.1.1.2'	'PS.lightreaction.photosystem II.PSII polypeptide subunits'	thylakoid lumen
Medtr7g023290	'1.1.1.2'	'PS.lightreaction.photosystem II.PSII polypeptide subunits'	Mog1/PsbP/DUF1795
Medtr7g088880	'1.1.1.2'	'PS.lightreaction.photosystem II.PSII polypeptide subunits'	thylakoid lumen
Medtr7g111880	'1.1.1.2'	'PS.lightreaction.photosystem II.PSII polypeptide subunits'	Mog1/PsbP/DUF1795
Medtr8g005175	'1.1.1.2'	'PS.lightreaction.photosystem II.PSII polypeptide subunits'	chloroplast precursor (OEE3) (16 kDa subunit of oxygen evolving system of photosystem II) (OEC 16 kDa subunit) - Spinacia oleracea (Spinach) & (ipr008797 : 158.69604) Photosystem II PsbQ
Medtr8g078870	'1.1.1.2'	'PS.lightreaction.photosystem II.PSII polypeptide subunits'	chloroplast precursor (OEE1) (33 kDa subunit of oxygen evolving system of photosystem II) (OEC 33 kDa subunit) (33 kDa thylakoid membrane protein) - Pisum sativum (Garden pea) & (at3g50820 : 475.0) Encodes a protein which is an extrinsic subunit of photosystem II and which has been proposed to play a central role in stabilization of the catalytic manganese cluster. In <i>Arabidopsis thaliana</i> …
Medtr8g089610	'1.1.1.2'	'PS.lightreaction.photosystem II.PSII polypeptide subunits'	chloroplast precursor (L-arginine-metabolizing enzyme) (L-AME) [Contains: Photosystem II protein psbY-1 (psbY-A1); Photosystem II protein psbY-2 (psbY-A2)] - Spinacia oleracea (Spinach) & (at1g67740 : 100.0) PsbY precursor (psbY) mRNA. This single nuclear gene is imported into the chloroplasts where it is processed into two integral membrane proteins with identical topology (PsbY-1 and PsbY-2). T…
Medtr4g075040	'1.1.1.3'	'PS.lightreaction.photosystem II.biogenesis'	plastid organization
Medtr1g098280	'1.1.2.1'	'PS.lightreaction.photosystem I.LHC-I'	chloroplast; EXPRESSED IN: 22 plant structures; EXPRESSED DURING: 13 growth stages; Has 171 Blast hits to 159 proteins in 56 species: Archae - 0; Bacteria - 5; Metazoa - 24; Fungi - 6; Plants - 64; Viruses - 16; Other Eukaryotes - 56 (source: NCBI BLink). & (reliability: 320.0) & (original description: no original description)'
Medtr2g042720	'1.1.2.1'	'PS.lightreaction.photosystem I.LHC-I'	; photosystem I light harvesting complex gene 6 (LHCA6); FUNCTIONS IN: chlorophyll binding; INVOLVED IN: response to blue light
Medtr3g101670	'1.1.2.1'	'PS.lightreaction.photosystem I.LHC-I'	light harvesting in photosystem I
Medtr3g435460	'1.1.2.1'	'PS.lightreaction.photosystem I.LHC-I'	photosynthesis; LOCATED IN: in 7 components; EXPRESSED IN: 24 plant structures; EXPRESSED DURING: 14 growth stages; CONTAINS InterPro DOMAIN/s: Chlorophyll A-B binding protein (InterPro:IPR001344); BEST Arabidopsis thaliana protein match is: photosystem I light harvesting complex gene 2 (TAIR:AT3G61470.1); Has 2336 Blast hits to 2249 proteins in 223 species: Archae - 0; Bacteria - 0; Metazoa - 3;…
Medtr5g098770	'1.1.2.1'	'PS.lightreaction.photosystem I.LHC-I'	light harvesting
Medtr5g098780	'1.1.2.1'	'PS.lightreaction.photosystem I.LHC-I'	light harvesting
Medtr5g098785	'1.1.2.1'	'PS.lightreaction.photosystem I.LHC-I'	light harvesting
Medtr6g033320	'1.1.2.1'	'PS.lightreaction.photosystem I.LHC-I'	response to red light
Medtr8g023790	'1.1.2.1'	'PS.lightreaction.photosystem I.LHC-I'	chloroplast precursor (LHCI type II CAB) - Petunia hybrida (Petunia) & (at3g61470 : 400.0) Encodes a component of the light harvesting antenna complex of photosystem I.; photosystem I light harvesting complex gene 2 (LHCA2); FUNCTIONS IN: chlorophyll binding; INVOLVED IN: photosynthesis
Medtr1g026820	'1.1.2.2'	'PS.lightreaction.photosystem I.PSI polypeptide subunits'	chloroplast precursor (Photosystem I subunit X) (PSI-K) - Medicago sativa (Alfalfa) & (at1g30380 : 153.0) Encodes subunit K of photosystem I reaction center.; photosystem I subunit K (PSAK); FUNCTIONS IN: molecular_function unknown; INVOLVED IN: photosynthesis; LOCATED IN: thylakoid
Medtr1g069235	'1.1.2.2'	'PS.lightreaction.photosystem I.PSI polypeptide subunits'	chloroplast precursor (PSI-E A) [Contains: Photosystem I reaction center subunit IV A isoform 2] - Nicotiana sylvestris (Wood tobacco) & (at2g20260 : 116.0) Encodes subunit E of photosystem I.; photosystem I subunit E-2 (PSAE-2); FUNCTIONS IN: catalytic activity; INVOLVED IN: photosynthesis; LOCATED IN: thylakoid
Medtr2g029370	'1.1.2.2'	'PS.lightreaction.photosystem I.PSI polypeptide subunits'	subunit III (InterPro:IPR003666); Has 387 Blast hits to 387 proteins in 119 species: Archae - 0; Bacteria - 139; Metazoa - 0; Fungi - 0; Plants - 79; Viruses - 6; Other Eukaryotes - 163 (source: NCBI BLink). & (p12355|psaf_spiol : 291.0) Photosystem I reaction center subunit III
Medtr2g101820	'1.1.2.2'	'PS.lightreaction.photosystem I.PSI polypeptide subunits'	chloroplast precursor (PSI-H) (Light-harvesting complex I 11 kDa protein) - Spinacia oleracea (Spinach) & (at1g52230 : 126.0) photosystem I subunit H2 (PSAH2); FUNCTIONS IN: molecular_function unknown; INVOLVED IN: photosynthesis; LOCATED IN: in 6 components; EXPRESSED IN: 21 plant structures; EXPRESSED DURING: 13 growth stages; CONTAINS InterPro DOMAIN/s: Photosystem I reaction centre subunit VI…
Medtr3g010000	'1.1.2.2'	'PS.lightreaction.photosystem I.PSI polypeptide subunits'	an 11-kDa membrane protein that plays an important role in electron transport between plastocyanin and PSI and is involved in the stability of the PSI complex. PSI-G subunit is bound to PSI-B and is in contact with Lhca1. The protein inserts into thylakoids by a direct or "spontaneous" pathway that does not involve the activities of any known chloroplast protein-targeting machinery. PSI-G appears…
Medtr3g095540	'1.1.2.2'	'PS.lightreaction.photosystem I.PSI polypeptide subunits'	photosystem I
Medtr4g052420	'1.1.2.2'	'PS.lightreaction.photosystem I.PSI polypeptide subunits'	photosynthesis
Medtr5g006130	'1.1.2.2'	'PS.lightreaction.photosystem I.PSI polypeptide subunits'	chloroplast precursor (Photosystem I 20 kDa subunit) (PSI-D) (PS I subunit 5) - Cucumis sativus (Cucumber) & (at4g02770 : 263.0) Encodes a protein predicted by sequence similarity with spinach PsaD to be photosystem I reaction center subunit II (PsaD1); photosystem I subunit D-1 (PSAD-1); FUNCTIONS IN: molecular_function unknown; INVOLVED IN: photosynthesis; LOCATED IN: in 6 components; EXPRESSED…
Medtr7g079900	'1.1.2.2'	'PS.lightreaction.photosystem I.PSI polypeptide subunits'	light reaction
Medtr7g099390	'1.1.2.2'	'PS.lightreaction.photosystem I.PSI polypeptide subunits'	chloroplast precursor (PSI-E A) [Contains: Photosystem I reaction center subunit IV A isoform 2] - Nicotiana sylvestris (Wood tobacco) & (at2g20260 : 117.0) Encodes subunit E of photosystem I.; photosystem I subunit E-2 (PSAE-2); FUNCTIONS IN: catalytic activity; INVOLVED IN: photosynthesis; LOCATED IN: thylakoid
Medtr7g118290	'1.1.2.2'	'PS.lightreaction.photosystem I.PSI polypeptide subunits'	and this ratio is not affected by light. Contains seven phosphorylation sites on threonine residue and chloroplast targeting signal. Located in the proximity of PSI-L
Medtr8g024180	'1.1.2.2'	'PS.lightreaction.photosystem I.PSI polypeptide subunits'	and this ratio is not affected by light. Contains seven phosphorylation sites on threonine residue and chloroplast targeting signal. Located in the proximity of PSI-L
Medtr1g034260	'1.1.3'	'PS.lightreaction.cytochrome b6/f'	putative; Has 37 Blast hits to 37 proteins in 10 species: Archae - 0; Bacteria - 0; Metazoa - 0; Fungi - 0; Plants - 37; Viruses - 0; Other Eukaryotes - 0 (source: NCBI BLink). & (reliability: 204.0) & (original description: no original description)'
Medtr2g089510	'1.1.3'	'PS.lightreaction.cytochrome b6/f'	chloroplast precursor (EC 1.10.99.1) (Rieske iron-sulfur protein) (Plastohydroquinone:plastocyanin oxidoreductase iron-sulfur protein) (ISP) (RISP) - Pisum sativum (Garden pea) & (at4g03280 : 281.0) Encodes the Rieske FeS center of cytochrome b6f complex. Gene is expressed in shoot but not in root. Mutant has reduced electron transport at saturating light intensities and Q-cycle activity is hyper…
Medtr4g069970	'1.1.30'	'PS.lightreaction.state transition'	protein kinase activity
Medtr5g017080	'1.1.30'	'PS.lightreaction.state transition'	protein kinase activity
Medtr6g007690	'1.1.30'	'PS.lightreaction.state transition'	protein kinase activity
Medtr4g079850	'1.1.4'	'PS.lightreaction.ATP synthase'	T
Medtr3g035730	'1.1.4.2'	'PS.lightreaction.ATP synthase.beta subunit'	zinc ion binding; INVOLVED IN: defense response to fungus
Medtr4g451275	'1.1.4.2'	'PS.lightreaction.ATP synthase.beta subunit'	zinc ion binding; INVOLVED IN: defense response to fungus
Medtr7g033755	'1.1.4.2'	'PS.lightreaction.ATP synthase.beta subunit'	zinc ion binding; INVOLVED IN: defense response to fungus
Medtr2g023290	'1.1.4.4'	'PS.lightreaction.ATP synthase.gamma chain'	chloroplast precursor (EC 3.6.3.14) - Pisum sativum (Garden pea) & (at4g04640 : 469.0) One of two genes (with ATPC2) encoding the gamma subunit of Arabidopsis chloroplast ATP synthase.; ATPC1; FUNCTIONS IN: enzyme regulator activity; INVOLVED IN: photosynthetic electron transport in photosystem II
Medtr4g103330	'1.1.4.7'	'PS.lightreaction.ATP synthase.delta chain'	chloroplast precursor (EC 3.6.3.14) - Pisum sativum (Garden pea) & (at4g09650 : 214.0) Encodes the chloroplast ATPase delta-subunit.; ATP synthase delta-subunit gene (ATPD); FUNCTIONS IN: hydrogen ion transporting ATP synthase activity
Medtr3g106820	'1.1.4.9'	'PS.lightreaction.ATP synthase.subunit B_ (ATPX)'	chloroplast precursor (EC 3.6.3.14) (Subunit II) - Spinacia oleracea (Spinach) & (at4g32260 : 184.0) ATPase
Medtr1g045140	'1.1.40'	'PS.lightreaction.cyclic electron flow-chlororespiration'	response to high light intensity
Medtr2g025140	'1.1.40'	'PS.lightreaction.cyclic electron flow-chlororespiration'	a non-colored C40 carotenoid intermediate. This suggests that immutans controls
Medtr4g010140	'1.1.40'	'PS.lightreaction.cyclic electron flow-chlororespiration'	T
Medtr4g102440	'1.1.40'	'PS.lightreaction.cyclic electron flow-chlororespiration'	a transmembrane protein present in thylakoids. PGRL1A has a highly homologous isoform PGRL1B encoded by At4g11960. Plants lacking PGRL1 show perturbation of cyclic electron flow
Medtr5g011220	'1.1.40'	'PS.lightreaction.cyclic electron flow-chlororespiration'	a transmembrane protein present in thylakoids. PGRL1A has a highly homologous isoform PGRL1B encoded by At4g11960. Plants lacking PGRL1 show perturbation of cyclic electron flow
Medtr7g085490	'1.1.40'	'PS.lightreaction.cyclic electron flow-chlororespiration'	involved in cyclic electron flow around photosystem I to produce ATP.; NDH-dependent cyclic electron flow 1 (NDF2); BEST Arabidopsis thaliana protein match is: NDH-dependent cyclic electron flow 5 (TAIR:AT1G55370.2). & (reliability: 768.0) & (original description: no original description)'
Medtr3g114850	'1.1.5.1'	'PS.lightreaction.other electron carrier (ox/red).plastocyanin'	chloroplast precursor - Pisum sativum (Garden pea) & (at1g20340 : 176.0) recombination and DNA-damage resistance protein (DRT112) One of two Arabidopsis plastocyanin genes. Predominant form
Medtr1g011510	'1.1.5.2'	'PS.lightreaction.other electron carrier (ox/red).ferredoxin'	iron-sulfur cluster binding; LOCATED IN: chloroplast; EXPRESSED IN: 21 plant structures; EXPRESSED DURING: 15 growth stages; CONTAINS InterPro DOMAIN/s: Ferredoxin (InterPro:IPR001041); BEST Arabidopsis thaliana protein match is: NDH-dependent cyclic electron flow 1 (TAIR:AT3G16250.1); Has 35333 Blast hits to 34131 proteins in 2444 species: Archae - 798; Bacteria - 22429; Metazoa - 974; Fungi - 9…
Medtr2g006290	'1.1.5.2'	'PS.lightreaction.other electron carrier (ox/red).ferredoxin'	chloroplast precursor (Ferredoxin I) - Pisum sativum (Garden pea) & (at1g60950 : 149.0) encodes a major leaf ferredoxin; FED A; FUNCTIONS IN: electron carrier activity
Medtr2g101380	'1.1.5.2'	'PS.lightreaction.other electron carrier (ox/red).ferredoxin'	involved in cyclic electron flow around photosystem I to produce ATP. Contains a 4Fe-4S cluster.; NDH-dependent cyclic electron flow 1 (NDF4); FUNCTIONS IN: electron carrier activity
Medtr3g105080	'1.1.5.2'	'PS.lightreaction.other electron carrier (ox/red).ferredoxin'	T
Medtr8g088720	'1.1.5.2'	'PS.lightreaction.other electron carrier (ox/red).ferredoxin'	chloroplast precursor (PFLP) - Capsicum annuum (Bell pepper) & (at1g60950 : 158.0) encodes a major leaf ferredoxin; FED A; FUNCTIONS IN: electron carrier activity
Medtr5g022300	'1.1.5.3'	'PS.lightreaction.other electron carrier (ox/red).ferredoxin reductase'	leaf isozyme
Medtr1g031740	'1.1.6'	'PS.lightreaction.NADH DH'	involved in PSI cyclic electron transport. Located in the membrane fraction of chloroplast. Mutant has impaired NAD(P)H dehydrogenase activity.; CHLORORESPIRATORY REDUCTION 3 (CRR3); FUNCTIONS IN: molecular_function unknown; INVOLVED IN: photosynthetic electron transport in photosystem I; LOCATED IN: chloroplast
Medtr3g062890	'1.1.6'	'PS.lightreaction.NADH DH'	acting on NADH or NADPH
Medtr3g088645	'1.1.6'	'PS.lightreaction.NADH DH'	acting on NADH or NADPH
Medtr3g096290	'1.1.6'	'PS.lightreaction.NADH DH'	acting on NADH or NADPH
Medtr7g016670	'1.2'	'PS.photorespiration'	putative; FUNCTIONS IN: hydroxymethyl-
Medtr7g080530	'1.2.1'	'PS.photorespiration.phosphoglycolate phosphatase'	subfamily IIA (InterPro:IPR006357)
Medtr2g070420	'1.2.2'	'PS.photorespiration.glycolate oxydase'	metabolic process; LOCATED IN: apoplast
Medtr3g053890	'1.2.3'	'PS.photorespiration.aminotransferases peroxisomal'	serine-glyoxylate transaminase activity
Medtr5g033230	'1.2.3'	'PS.photorespiration.aminotransferases peroxisomal'	L-alanine:2-oxoglutarate aminotransferase activity
Medtr1g016230	'1.2.4.1'	'PS.photorespiration.glycine cleavage.P subunit'	mitochondrial precursor (EC 1.4.4.2) (Glycine decarboxylase) (Glycine cleavage system P-protein) - Pisum sativum (Garden pea) & (at4g33010 : 1796.0) glycine decarboxylase P-protein 1 (GLDP1); FUNCTIONS IN: glycine dehydrogenase (decarboxylating) activity
Medtr4g084110	'1.2.4.4'	'PS.photorespiration.glycine cleavage.H protein'	ATP binding; INVOLVED IN: glycine catabolic process
Medtr5g014260	'1.2.4.4'	'PS.photorespiration.glycine cleavage.H protein'	mitochondrial precursor - Pisum sativum (Garden pea) & (at1g32470 : 164.0) Single hybrid motif superfamily protein; FUNCTIONS IN: glycine dehydrogenase (decarboxylating) activity; INVOLVED IN: glycine catabolic process
Medtr3g073470	'1.2.5'	'PS.photorespiration.serine hydroxymethyltransferase'	glycine hydroxymethyltransferase activity
Medtr5g030950	'1.2.5'	'PS.photorespiration.serine hydroxymethyltransferase'	mitochondrial precursor (EC 2.1.2.1) (Serine methylase) (Glycine hydroxymethyltransferase) (SHMT) - Pisum sativum (Garden pea) & (at4g37930 : 894.0) Encodes a protein with mitochondrial serine hydroxymethyltransferase activity
Medtr5g067060	'1.2.5'	'PS.photorespiration.serine hydroxymethyltransferase'	mitochondrial precursor (EC 2.1.2.1) (Serine methylase) (Glycine hydroxymethyltransferase) (SHMT) - Pisum sativum (Garden pea) & (at5g26780 : 865.0) Encodes a protein with serine hydroxymethyltransferase activity which is thought to be localized in the mitochondrial matrix. SHM2 expression fails to rescue the conditional lethal phenotype of the shm1-1 mutant
Medtr8g081510	'1.2.5'	'PS.photorespiration.serine hydroxymethyltransferase'	glycine hydroxymethyltransferase activity
Medtr2g101840	'1.2.6'	'PS.photorespiration.hydroxypyruvate reductase'	catalytic domain (InterPro:IPR006139)
Medtr8g033390	'1.2.6'	'PS.photorespiration.hydroxypyruvate reductase'	oxidoreductase activity
Medtr8g033410	'1.2.6'	'PS.photorespiration.hydroxypyruvate reductase'	oxidoreductase activity
Medtr1g087030	'1.3'	'PS.calvin cycle'	response to light stimulus
Medtr2g032540	'1.3.10'	'PS.calvin cycle.Rib5P Isomerase'	5-phosphoribose 1-diphosphate biosynthetic process
Medtr5g027530	'1.3.12'	'PS.calvin cycle.PRK'	chloroplast precursor (EC 2.7.1.19) (Phosphopentokinase) (PRKase) (PRK) - Mesembryanthemum crystallinum (Common ice plant) & (at1g32060 : 662.0) phosphoribulokinase (PRK); FUNCTIONS IN: protein binding
Medtr2g035660	'1.3.13'	'PS.calvin cycle.rubisco interacting'	chloroplast
Medtr2g105480	'1.3.13'	'PS.calvin cycle.rubisco interacting'	ATP binding; LOCATED IN: chloroplast thylakoid membrane
Medtr3g068030	'1.3.13'	'PS.calvin cycle.rubisco interacting'	chloroplast precursor (RuBisCO activase) (RA) - Malus domestica (Apple) (Malus sylvestris) & (at2g39730 : 701.0) Rubisco activase
Medtr4g021210	'1.3.13'	'PS.calvin cycle.rubisco interacting'	a nuclear-encoded chloroplast protein that consists of two isoforms arising from alternative splicing in most plants. Required for the light activation of rubisco.; rubisco activase (RCA); FUNCTIONS IN: enzyme regulator activity
Medtr4g057970	'1.3.13'	'PS.calvin cycle.rubisco interacting'	chloroplast precursor (60 kDa chaperonin subunit alpha) (CPN-60 alpha) - Pisum sativum (Garden pea) & (at2g28000 : 785.0) Encodes chaperonin-60 alpha
Medtr5g080450	'1.3.13'	'PS.calvin cycle.rubisco interacting'	a nuclear-encoded chloroplast protein that consists of two isoforms arising from alternative splicing in most plants. Required for the light activation of rubisco.; rubisco activase (RCA); FUNCTIONS IN: enzyme regulator activity
Medtr6g018300	'1.3.2'	'PS.calvin cycle.rubisco small subunit'	chloroplast precursor (EC 4.1.1.39) (RuBisCO small subunit) - Medicago sativa (Alfalfa) & (at1g67090 : 278.0) ribulose bisphosphate carboxylase small chain 1A (RBCS1A); FUNCTIONS IN: ribulose-bisphosphate carboxylase activity
Medtr6g018310	'1.3.2'	'PS.calvin cycle.rubisco small subunit'	chloroplast precursor (EC 4.1.1.39) (RuBisCO small subunit) - Medicago sativa (Alfalfa) & (at1g67090 : 278.0) ribulose bisphosphate carboxylase small chain 1A (RBCS1A); FUNCTIONS IN: ribulose-bisphosphate carboxylase activity
Medtr7g007120	'1.3.2'	'PS.calvin cycle.rubisco small subunit'	chloroplast precursor (EC 4.1.1.39) (RuBisCO small subunit 3A) - Pisum sativum (Garden pea) & (at1g67090 : 260.0) ribulose bisphosphate carboxylase small chain 1A (RBCS1A); FUNCTIONS IN: ribulose-bisphosphate carboxylase activity
Medtr7g007200	'1.3.2'	'PS.calvin cycle.rubisco small subunit'	chloroplast precursor (EC 4.1.1.39) (RuBisCO small subunit 3A) - Pisum sativum (Garden pea) & (at1g67090 : 261.0) ribulose bisphosphate carboxylase small chain 1A (RBCS1A); FUNCTIONS IN: ribulose-bisphosphate carboxylase activity
Medtr7g007210	'1.3.2'	'PS.calvin cycle.rubisco small subunit'	chloroplast precursor (EC 4.1.1.39) (RuBisCO small subunit 3A) - Pisum sativum (Garden pea) & (at1g67090 : 236.0) ribulose bisphosphate carboxylase small chain 1A (RBCS1A); FUNCTIONS IN: ribulose-bisphosphate carboxylase activity
Medtr7g007220	'1.3.2'	'PS.calvin cycle.rubisco small subunit'	chloroplast precursor (EC 4.1.1.39) (RuBisCO small subunit 3A) - Pisum sativum (Garden pea) & (at1g67090 : 261.0) ribulose bisphosphate carboxylase small chain 1A (RBCS1A); FUNCTIONS IN: ribulose-bisphosphate carboxylase activity
Medtr7g007230	'1.3.2'	'PS.calvin cycle.rubisco small subunit'	chloroplast precursor (EC 4.1.1.39) (RuBisCO small subunit 3A) - Pisum sativum (Garden pea) & (at1g67090 : 262.0) ribulose bisphosphate carboxylase small chain 1A (RBCS1A); FUNCTIONS IN: ribulose-bisphosphate carboxylase activity
Medtr2g066110	'1.3.3'	'PS.calvin cycle.phosphoglycerate kinase'	chloroplast precursor (EC 2.7.2.3) - Nicotiana tabacum (Common tobacco) & (at1g56190 : 667.0) Phosphoglycerate kinase family protein; FUNCTIONS IN: phosphoglycerate kinase activity; INVOLVED IN: glycolysis; LOCATED IN: thylakoid
Medtr2g066120	'1.3.3'	'PS.calvin cycle.phosphoglycerate kinase'	cytosolic (EC 2.7.2.3) - Nicotiana tabacum (Common tobacco) & (at1g79550 : 666.0) Encodes cytosolic phosphoglycerate kinase (PGK).; phosphoglycerate kinase (PGK); FUNCTIONS IN: phosphoglycerate kinase activity; INVOLVED IN: glycolysis; LOCATED IN: cytosol
Medtr6g018680	'1.3.3'	'PS.calvin cycle.phosphoglycerate kinase'	chloroplast precursor (EC 2.7.2.3) - Nicotiana tabacum (Common tobacco) & (at3g12780 : 177.0) nuclear phosphoglycerate kinase (PGK1); phosphoglycerate kinase 1 (PGK1); FUNCTIONS IN: phosphoglycerate kinase activity; INVOLVED IN: response to cadmium ion
Medtr3g115920	'1.3.4'	'PS.calvin cycle.GAP'	chloroplast precursor (EC 1.2.1.13) (NADP-dependent glyceraldehydephosphate dehydrogenase subunit B) - Pisum sativum (Garden pea) & (at1g42970 : 499.0) Encodes chloroplast localized glyceraldehyde-3-phosphate dehydrogenase that can use both NADH and NADPH to reduce 1
Medtr7g084800	'1.3.4'	'PS.calvin cycle.GAP'	chloroplast precursor (EC 1.2.1.13) (NADP-dependent glyceraldehydephosphate dehydrogenase subunit A) - Pisum sativum (Garden pea) & (at1g12900 : 606.0) glyceraldehyde 3-phosphate dehydrogenase A subunit 2 (GAPA-2); FUNCTIONS IN: NAD or NADH binding
Medtr7g103020	'1.3.5'	'PS.calvin cycle.TPI'	such as chlorosis in light-grown seedlings may result from an accumulation of dihydroxyacetone phosphate (DHAP) and methylglyoxal (MG) in these mutants. Both splice variants appear to be expressed
Medtr4g057670	'1.3.6'	'PS.calvin cycle.aldolase'	chloroplast precursor (EC 4.1.2.13) (Fragment) - Pisum sativum (Garden pea) & (at2g21330 : 648.0) fructose-bisphosphate aldolase 1 (FBA1); FUNCTIONS IN: fructose-bisphosphate aldolase activity
Medtr4g071860	'1.3.6'	'PS.calvin cycle.aldolase'	chloroplast precursor (EC 4.1.2.13) (Fragment) - Pisum sativum (Garden pea) & (at2g21330 : 649.0) fructose-bisphosphate aldolase 1 (FBA1); FUNCTIONS IN: fructose-bisphosphate aldolase activity
Medtr4g071880	'1.3.6'	'PS.calvin cycle.aldolase'	chloroplast precursor (EC 4.1.2.13) (Fragment) - Pisum sativum (Garden pea) & (at4g38970 : 572.0) Protein is tyrosine-phosphorylated and its phosphorylation state is modulated in response to ABA in Arabidopsis thaliana seeds.; fructose-bisphosphate aldolase 2 (FBA2); FUNCTIONS IN: fructose-bisphosphate aldolase activity
Medtr5g096670	'1.3.6'	'PS.calvin cycle.aldolase'	cytoplasmic isozyme 1 (EC 4.1.2.13) - Pisum sativum (Garden pea) & (gnl|cdd|84661 : 618.0) no description available & (gnl|cdd|36770 : 585.0) no description available & (at4g26530 : 577.0) Aldolase superfamily protein; FUNCTIONS IN: fructose-bisphosphate aldolase activity; INVOLVED IN: glycolysis
Medtr7g066120	'1.3.7'	'PS.calvin cycle.FBPase'	6-bisphosphatase
Medtr1g116120	'1.3.8'	'PS.calvin cycle.transketolase'	chloroplast precursor (EC 2.2.1.1) (TK) - Solanum tuberosum (Potato) & (at3g60750 : 1186.0) Transketolase; FUNCTIONS IN: catalytic activity
Medtr5g059410	'1.3.8'	'PS.calvin cycle.transketolase'	chloroplast precursor (EC 2.2.1.1) (TK) - Solanum tuberosum (Potato) & (at3g60750 : 1186.0) Transketolase; FUNCTIONS IN: catalytic activity
Medtr3g070100	'1.3.9'	'PS.calvin cycle.seduheptulose bisphosphatase'	7-bisphosphatase
Medtr5g080770	'10.1.1.1'	'cell wall.precursor synthesis.NDP sugar pyrophosphorylase.GDP mannose'	which is used for cell wall carbohydrate biosynthesis and protein glycosylation as well as for ascorbate (vitamin C) biosynthesis. Mutations in this gene confer hypersensitivity to NH4+.; CYTOKINESIS DEFECTIVE 1 (CYT1); CONTAINS InterPro DOMAIN/s: Trimeric LpxA-like (InterPro:IPR011004)
Medtr7g097060	'10.1.12.1'	'cell wall.precursor synthesis.KDO pathway.arabinose-5-phosphate isomerase'	sugar binding; INVOLVED IN: carbohydrate metabolic process; EXPRESSED IN: 23 plant structures; EXPRESSED DURING: 15 growth stages; CONTAINS InterPro DOMAIN/s: KpsF/GutQ (InterPro:IPR004800)
Medtr7g081220	'10.1.12.2'	'cell wall.precursor synthesis.KDO pathway.KDO-8-Phosphate Synthase'	a component of cell wall rhamnogalacturonan II.; AtkdsA1; FUNCTIONS IN: 3-deoxy-8-phosphooctulonate synthase activity; INVOLVED IN: metabolic process
Medtr4g134490	'10.1.2'	'cell wall.precursor synthesis.UGE'	protein dimerization activity; INVOLVED IN: response to stress
Medtr7g076670	'10.1.21'	'cell wall.precursor synthesis.phosphomannomutase'	involved in ascorbate biosynthesis; phosphomannomutase (PMM); FUNCTIONS IN: protein binding
Medtr1g107455	'10.1.3'	'cell wall.precursor synthesis.AXS'	cytoplasm; EXPRESSED IN: fruit
Medtr4g053420	'10.1.3'	'cell wall.precursor synthesis.AXS'	cytoplasm; EXPRESSED IN: fruit
Medtr7g012950	'10.1.4'	'cell wall.precursor synthesis.UDP-Glc dehydrogenase (UGD)'	metabolic process; LOCATED IN: cytosol
Medtr1g088480	'10.1.5'	'cell wall.precursor synthesis.UXS'	which is predicted to be membrane-bound by PSORT. This enzyme produces UDP-xylose
Medtr3g084090	'10.1.6'	'cell wall.precursor synthesis.GAE'	catalytic activity; INVOLVED IN: cellular metabolic process
Medtr4g129820	'10.1.6'	'cell wall.precursor synthesis.GAE'	catalytic activity; INVOLVED IN: cellular metabolic process
Medtr5g021760	'10.1.7'	'cell wall.precursor synthesis.GMD'	6-dehydratase; "GDP-D-mannose 4
Medtr7g108490	'10.1.8'	'cell wall.precursor synthesis.GER'	binding
Medtr8g089180	'10.1.9'	'cell wall.precursor synthesis.MUR4'	the nucleotide sugar used by glycosyltransferases in the arabinosylation of cell wall polysaccharides and wall-resident proteoglycans.; MURUS 4 (MUR4); FUNCTIONS IN: UDP-arabinose 4-epimerase activity
Medtr1g069605	'10.2'	'cell wall.cellulose synthesis'	independent of salicylic acid
Medtr2g028480	'10.2'	'cell wall.cellulose synthesis'	family 9 & (at5g49720 : 951.0) Encodes a membrane-bound endo-1
Medtr2g035780	'10.2'	'cell wall.cellulose synthesis'	plant-type cell wall biogenesis
Medtr3g109040	'10.2'	'cell wall.cellulose synthesis'	transferase activity
Medtr4g006010	'10.2'	'cell wall.cellulose synthesis'	transferase activity
Medtr4g055520	'10.2'	'cell wall.cellulose synthesis'	family 2 (InterPro:IPR001173); BEST Arabidopsis thaliana protein match is: Nucleotide-diphospho-sugar transferases superfamily protein (TAIR:AT5G03760.1); Has 5133 Blast hits to 5129 proteins in 1484 species: Archae - 200; Bacteria - 4017; Metazoa - 35; Fungi - 91; Plants - 482; Viruses - 11; Other Eukaryotes - 297 (source: NCBI BLink). & (gnl|cdd|31408 : 124.0) no description available & (reliab…
Medtr7g103590	'10.2'	'cell wall.cellulose synthesis'	family 2 (InterPro:IPR001173); BEST Arabidopsis thaliana protein match is: cellulose synthase-like A02 (TAIR:AT5G22740.1); Has 1807 Blast hits to 1807 proteins in 277 species: Archae - 0; Bacteria - 0; Metazoa - 736; Fungi - 347; Plants - 385; Viruses - 0; Other Eukaryotes - 339 (source: NCBI BLink). & (gnl|cdd|31408 : 126.0) no description available & (reliability: 1774.0) & (original descriptio…
Medtr8g063270	'10.2'	'cell wall.cellulose synthesis'	plant-type cell wall biogenesis
Medtr1g098550	'10.2.1'	'cell wall.cellulose synthesis.cellulose synthase'	related to CESA6.; cellulose synthase A9 (CESA9); FUNCTIONS IN: cellulose synthase activity
Medtr2g016630	'10.2.1'	'cell wall.cellulose synthesis.cellulose synthase'	reduced cellulose content
Medtr3g005560	'10.2.1'	'cell wall.cellulose synthesis.cellulose synthase'	transferase activity
Medtr3g030040	'10.2.1'	'cell wall.cellulose synthesis.cellulose synthase'	along with CESA1 and CESA6 are present in the same plasma membrane complex for cellulose biosynthesis. As inferred from the null role of secondary wall-type CesAs
Medtr3g060220	'10.2.1'	'cell wall.cellulose synthesis.cellulose synthase'	transferase activity
Medtr3g060240	'10.2.1'	'cell wall.cellulose synthesis.cellulose synthase'	transferase activity
Medtr3g436010	'10.2.1'	'cell wall.cellulose synthesis.cellulose synthase'	along with CESA3 and CESA6 are present in the same plasma membrane complex for cellulose biosynthesis. lasma membrane complex for cellulose biosynthesis. As inferred from the null role of secondary wall-type CesAs
Medtr3g450800	'10.2.1'	'cell wall.cellulose synthesis.cellulose synthase'	transferase activity
Medtr4g050000	'10.2.1'	'cell wall.cellulose synthesis.cellulose synthase'	transferase activity
Medtr8g037260	'10.2.1'	'cell wall.cellulose synthesis.cellulose synthase'	along with CESA1 and CESA6 are present in the same plasma membrane complex for cellulose biosynthesis. As inferred from the null role of secondary wall-type CesAs
Medtr8g086600	'10.2.1'	'cell wall.cellulose synthesis.cellulose synthase'	reduced cellulose content
Medtr8g092590	'10.2.1'	'cell wall.cellulose synthesis.cellulose synthase'	along with CESA1 and CESA3 are present in the same plasma membrane complex for cellulose biosynthesis. CESA2 and CESA5 are related to CESA6
Medtr2g462000	'10.2.2'	'cell wall.cellulose synthesis.COBRA'	similar to phytochelatin synthetase. Involved in secondary cell wall biosynthesis. Mutants make smaller plants with reduced levels of cellulose and cell wall sugars.; IRREGULAR XYLEM 6 (IRX6); INVOLVED IN: secondary cell wall biogenesis; LOCATED IN: plasma membrane
Medtr2g462010	'10.2.2'	'cell wall.cellulose synthesis.COBRA'	multidimensional cell growth
Medtr3g117690	'10.2.2'	'cell wall.cellulose synthesis.COBRA'	anchored to membrane; EXPRESSED IN: 24 plant structures; EXPRESSED DURING: 13 growth stages; CONTAINS InterPro DOMAIN/s: Glycosyl-phosphatidyl inositol-anchored
Medtr6g015880	'10.2.2'	'cell wall.cellulose synthesis.COBRA'	similar to phytochelatin synthetase. Involved in secondary cell wall biosynthesis. Mutants make smaller plants with reduced levels of cellulose and cell wall sugars.; IRREGULAR XYLEM 6 (IRX6); INVOLVED IN: secondary cell wall biogenesis; LOCATED IN: plasma membrane
Medtr7g015950	'10.2.2'	'cell wall.cellulose synthesis.COBRA'	multidimensional cell growth
Medtr7g015960	'10.2.2'	'cell wall.cellulose synthesis.COBRA'	similar to phytochelatin synthetase. Involved in secondary cell wall biosynthesis. Mutants make smaller plants with reduced levels of cellulose and cell wall sugars.; IRREGULAR XYLEM 6 (IRX6); INVOLVED IN: secondary cell wall biogenesis; LOCATED IN: plasma membrane
Medtr4g108780	'10.3'	'cell wall.hemicellulose synthesis'	2)-fucosyltransferase) (PsFT1) - Pisum sativum (Garden pea) & (gnl|cdd|66898 : 675.0) no description available & (at2g03220 : 607.0) member of Glycosyltransferase Family- 37; fucosyltransferase 1 (FT1); FUNCTIONS IN: transferase activity
Medtr8g099865	'10.3'	'cell wall.hemicellulose synthesis'	2)-fucosyltransferase) (PsFT1) - Pisum sativum (Garden pea) & (at2g03220 : 482.0) member of Glycosyltransferase Family- 37; fucosyltransferase 1 (FT1); FUNCTIONS IN: transferase activity
Medtr7g098650	'10.3.1.1'	'cell wall.hemicellulose synthesis.xyloglucan.XXXG galactose Transferase'	T
Medtr1g019540	'10.3.2'	'cell wall.hemicellulose synthesis.glucuronoxylan'	transferring glycosyl groups; INVOLVED IN: biosynthetic process; LOCATED IN: endomembrane system; EXPRESSED IN: inflorescence meristem
Medtr1g021855	'10.3.2'	'cell wall.hemicellulose synthesis.glucuronoxylan'	transferring hexosyl groups
Medtr1g029130	'10.3.2'	'cell wall.hemicellulose synthesis.glucuronoxylan'	family 8 (InterPro:IPR002495); BEST Arabidopsis thaliana protein match is: plant glycogenin-like starch initiation protein 1 (TAIR:AT3G18660.3); Has 1471 Blast hits to 1463 proteins in 343 species: Archae - 0; Bacteria - 240; Metazoa - 259; Fungi - 287; Plants - 508; Viruses - 75; Other Eukaryotes - 102 (source: NCBI BLink). & (gnl|cdd|37161 : 265.0) no description available & (gnl|cdd|85496 : 12…
Medtr2g082650	'10.3.2'	'cell wall.hemicellulose synthesis.glucuronoxylan'	family 8 (InterPro:IPR002495); BEST Arabidopsis thaliana protein match is: galacturonosyltransferase 13 (TAIR:AT3G01040.2); Has 1807 Blast hits to 1807 proteins in 277 species: Archae - 0; Bacteria - 0; Metazoa - 736; Fungi - 347; Plants - 385; Viruses - 0; Other Eukaryotes - 339 (source: NCBI BLink). & (gnl|cdd|85496 : 180.0) no description available & (ipr002495 : 147.36545) Glycosyl transferase
Medtr3g111600	'10.3.2'	'cell wall.hemicellulose synthesis.glucuronoxylan'	transferring hexosyl groups
Medtr4g094912	'10.3.2'	'cell wall.hemicellulose synthesis.glucuronoxylan'	IRX9 homolog); AT4G36890 (IRX14) and AT5G67230 (IRX14-L or I14H
Medtr5g019220	'10.3.2'	'cell wall.hemicellulose synthesis.glucuronoxylan'	transferring hexosyl groups
Medtr8g033360	'10.4.1.1'	'cell wall.pectin synthesis.homogalacturonan.Galacturonic Acid Trnasferase'	family 8 (InterPro:IPR002495); BEST Arabidopsis thaliana protein match is: galacturonosyltransferase 3 (TAIR:AT4G38270.2); Has 1521 Blast hits to 1503 proteins in 273 species: Archae - 4; Bacteria - 491; Metazoa - 148; Fungi - 2; Plants - 840; Viruses - 0; Other Eukaryotes - 36 (source: NCBI BLink). & (gnl|cdd|85496 : 188.0) no description available & (ipr002495 : 150.38138) Glycosyl transferase
Medtr2g017950	'10.5.1.1'	'cell wall.cell wall proteins.AGPs.AGP'	anchored to membrane; EXPRESSED IN: 22 plant structures; EXPRESSED DURING: 13 growth stages; CONTAINS InterPro DOMAIN/s: FAS1 domain (InterPro:IPR000782); BEST Arabidopsis thaliana protein match is: FASCICLIN-like arabinogalactan-protein 11 (TAIR:AT5G03170.1); Has 1807 Blast hits to 1807 proteins in 277 species: Archae - 0; Bacteria - 0; Metazoa - 736; Fungi - 347; Plants - 385; Viruses - 0; Othe…
Medtr2g017960	'10.5.1.1'	'cell wall.cell wall proteins.AGPs.AGP'	anchored to membrane; EXPRESSED IN: 22 plant structures; EXPRESSED DURING: 13 growth stages; CONTAINS InterPro DOMAIN/s: FAS1 domain (InterPro:IPR000782); BEST Arabidopsis thaliana protein match is: FASCICLIN-like arabinogalactan-protein 11 (TAIR:AT5G03170.1); Has 1807 Blast hits to 1807 proteins in 277 species: Archae - 0; Bacteria - 0; Metazoa - 736; Fungi - 347; Plants - 385; Viruses - 0; Othe…
Medtr2g017970	'10.5.1.1'	'cell wall.cell wall proteins.AGPs.AGP'	anchored to membrane; EXPRESSED IN: 22 plant structures; EXPRESSED DURING: 13 growth stages; CONTAINS InterPro DOMAIN/s: FAS1 domain (InterPro:IPR000782); BEST Arabidopsis thaliana protein match is: FASCICLIN-like arabinogalactan-protein 11 (TAIR:AT5G03170.1); Has 1807 Blast hits to 1807 proteins in 277 species: Archae - 0; Bacteria - 0; Metazoa - 736; Fungi - 347; Plants - 385; Viruses - 0; Othe…
Medtr2g093980	'10.5.1.1'	'cell wall.cell wall proteins.AGPs.AGP'	T
Medtr2g093990	'10.5.1.1'	'cell wall.cell wall proteins.AGPs.AGP'	anchored to membrane; EXPRESSED IN: 22 plant structures; EXPRESSED DURING: 13 growth stages; CONTAINS InterPro DOMAIN/s: FAS1 domain (InterPro:IPR000782); BEST Arabidopsis thaliana protein match is: FASCICLIN-like arabinogalactan-protein 11 (TAIR:AT5G03170.1); Has 1807 Blast hits to 1807 proteins in 277 species: Archae - 0; Bacteria - 0; Metazoa - 736; Fungi - 347; Plants - 385; Viruses - 0; Othe…
Medtr2g437700	'10.5.1.1'	'cell wall.cell wall proteins.AGPs.AGP'	abnormal siliques and root growth is inhibited under salt stress. The gene has similarity to arabinogalactan proteins and domains associated with cell adhesion.; salt overly sensitive 5 (SOS5); FUNCTIONS IN: polysaccharide binding; INVOLVED IN: multidimensional cell growth
Medtr3g460780	'10.5.1.1'	'cell wall.cell wall proteins.AGPs.AGP'	T
Medtr4g050170	'10.5.1.1'	'cell wall.cell wall proteins.AGPs.AGP'	T
Medtr4g053380	'10.5.1.1'	'cell wall.cell wall proteins.AGPs.AGP'	T
Medtr4g059720	'10.5.1.1'	'cell wall.cell wall proteins.AGPs.AGP'	anchored to membrane; EXPRESSED IN: 22 plant structures; EXPRESSED DURING: 13 growth stages; CONTAINS InterPro DOMAIN/s: FAS1 domain (InterPro:IPR000782); BEST Arabidopsis thaliana protein match is: FASCICLIN-like arabinogalactan-protein 11 (TAIR:AT5G03170.1); Has 1807 Blast hits to 1807 proteins in 277 species: Archae - 0; Bacteria - 0; Metazoa - 736; Fungi - 347; Plants - 385; Viruses - 0; Othe…
Medtr4g059780	'10.5.1.1'	'cell wall.cell wall proteins.AGPs.AGP'	anchored to membrane; EXPRESSED IN: 22 plant structures; EXPRESSED DURING: 13 growth stages; CONTAINS InterPro DOMAIN/s: FAS1 domain (InterPro:IPR000782); BEST Arabidopsis thaliana protein match is: FASCICLIN-like arabinogalactan-protein 11 (TAIR:AT5G03170.1); Has 1807 Blast hits to 1807 proteins in 277 species: Archae - 0; Bacteria - 0; Metazoa - 736; Fungi - 347; Plants - 385; Viruses - 0; Othe…
Medtr4g059790	'10.5.1.1'	'cell wall.cell wall proteins.AGPs.AGP'	anchored to membrane; EXPRESSED IN: 22 plant structures; EXPRESSED DURING: 13 growth stages; CONTAINS InterPro DOMAIN/s: FAS1 domain (InterPro:IPR000782); BEST Arabidopsis thaliana protein match is: FASCICLIN-like arabinogalactan-protein 11 (TAIR:AT5G03170.1); Has 1807 Blast hits to 1807 proteins in 277 species: Archae - 0; Bacteria - 0; Metazoa - 736; Fungi - 347; Plants - 385; Viruses - 0; Othe…
Medtr4g059840	'10.5.1.1'	'cell wall.cell wall proteins.AGPs.AGP'	anchored to membrane; EXPRESSED IN: 22 plant structures; EXPRESSED DURING: 13 growth stages; CONTAINS InterPro DOMAIN/s: FAS1 domain (InterPro:IPR000782); BEST Arabidopsis thaliana protein match is: FASCICLIN-like arabinogalactan-protein 11 (TAIR:AT5G03170.1); Has 1807 Blast hits to 1807 proteins in 277 species: Archae - 0; Bacteria - 0; Metazoa - 736; Fungi - 347; Plants - 385; Viruses - 0; Othe…
Medtr5g098060	'10.5.1.1'	'cell wall.cell wall proteins.AGPs.AGP'	plasma membrane
Medtr5g098420	'10.5.1.1'	'cell wall.cell wall proteins.AGPs.AGP'	complete cds; FASCICLIN-like arabinogalactan 2 (FLA2); INVOLVED IN: response to cyclopentenone; LOCATED IN: anchored to plasma membrane
Medtr7g075453	'10.5.1.1'	'cell wall.cell wall proteins.AGPs.AGP'	plasma membrane
Medtr7g101080	'10.5.1.1'	'cell wall.cell wall proteins.AGPs.AGP'	T
Medtr8g087450	'10.5.1.1'	'cell wall.cell wall proteins.AGPs.AGP'	anchored to membrane; EXPRESSED IN: 22 plant structures; EXPRESSED DURING: 13 growth stages; CONTAINS InterPro DOMAIN/s: FAS1 domain (InterPro:IPR000782); BEST Arabidopsis thaliana protein match is: FASCICLIN-like arabinogalactan-protein 11 (TAIR:AT5G03170.1); Has 1807 Blast hits to 1807 proteins in 277 species: Archae - 0; Bacteria - 0; Metazoa - 736; Fungi - 347; Plants - 385; Viruses - 0; Othe…
Medtr8g087460	'10.5.1.1'	'cell wall.cell wall proteins.AGPs.AGP'	anchored to membrane; EXPRESSED IN: 22 plant structures; EXPRESSED DURING: 13 growth stages; CONTAINS InterPro DOMAIN/s: FAS1 domain (InterPro:IPR000782); BEST Arabidopsis thaliana protein match is: FASCICLIN-like arabinogalactan-protein 11 (TAIR:AT5G03170.1); Has 1807 Blast hits to 1807 proteins in 277 species: Archae - 0; Bacteria - 0; Metazoa - 736; Fungi - 347; Plants - 385; Viruses - 0; Othe…
Medtr4g075333	'10.5.2'	'cell wall.cell wall proteins.proline rich proteins'	T
Medtr4g078535	'10.5.3'	'cell wall.cell wall proteins.LRR'	T
Medtr6g086115	'10.5.3'	'cell wall.cell wall proteins.LRR'	plant-type cell wall; EXPRESSED IN: 22 plant structures; EXPRESSED DURING: 13 growth stages; CONTAINS InterPro DOMAIN/s: Leucine-rich repeat-containing N-terminal domain
Medtr8g102260	'10.5.3'	'cell wall.cell wall proteins.LRR'	type 2 (InterPro:IPR013210)
Medtr8g103700	'10.5.3'	'cell wall.cell wall proteins.LRR'	type 2 (InterPro:IPR013210); BEST Arabidopsis thaliana protein match is: Leucine-rich repeat (LRR) family protein (TAIR:AT3G24480.1); Has 60217 Blast hits to 20533 proteins in 968 species: Archae - 15; Bacteria - 2115; Metazoa - 6070; Fungi - 1014; Plants - 47629; Viruses - 97; Other Eukaryotes - 3277 (source: NCBI BLink). & (gnl|cdd|35481 : 106.0) no description available & (q8lpb4|pskr_dauca : …
Medtr2g461970	'10.5.5'	'cell wall.cell wall proteins.RGP'	4-glucan-protein synthase [UDP-forming] 2 (EC 2.4.1.112) (UDP-glucose:protein transglucosylase 2) (UPTG 2) - Solanum tuberosum (Potato) & (at3g02230 : 640.0) reversibly glycosylated polypeptide possibly involved in plant cell wall synthesis; reversibly glycosylated polypeptide 1 (RGP1); FUNCTIONS IN: cellulose synthase (UDP-forming) activity; INVOLVED IN: response to salt stress
Medtr5g046030	'10.5.5'	'cell wall.cell wall proteins.RGP'	4-glucan-protein synthase [UDP-forming] (EC 2.4.1.112) (UDP-glucose:protein transglucosylase) (UPTG) (Reversibly glycosylated polypeptide) - Pisum sativum (Garden pea) & (at3g08900 : 674.0) Encodes a reversible autoglycosylated protein peripherally associated with cell membranes. Highly expressed in roots ans suspension-cultured cells.; reversibly glycosylated polypeptide 3 (RGP3); FUNCTIONS IN: …
Medtr1g101750	'10.6'	'cell wall.degradation'	T
Medtr4g116070	'10.6'	'cell wall.degradation'	N-terminal (InterPro:IPR005199); BEST Arabidopsis thaliana protein match is: glucuronidase 2 (TAIR:AT5G07830.1); Has 340 Blast hits to 334 proteins in 62 species: Archae - 0; Bacteria - 20; Metazoa - 169; Fungi - 0; Plants - 131; Viruses - 0; Other Eukaryotes - 20 (source: NCBI BLink). & (gnl|cdd|67288 : 385.0) no description available & (ipr005199 : 333.87485) Glycoside hydrolase
Medtr8g032890	'10.6'	'cell wall.degradation'	T
Medtr8g032940	'10.6'	'cell wall.degradation'	T
Medtr3g079750	'10.6.1'	'cell wall.degradation.cellulases and beta -1	'(at5g20950 : 938.0) Glycosyl hydrolase family protein; FUNCTIONS IN: hydrolase activity
Medtr3g113720	'10.6.1'	'cell wall.degradation.cellulases and beta -1	'(at1g19940 : 687.0) glycosyl hydrolase 9B5 (GH9B5); FUNCTIONS IN: hydrolase activity
Medtr7g051650	'10.6.1'	'cell wall.degradation.cellulases and beta -1	'(gnl|cdd|35845 : 512.0) no description available & (gnl|cdd|84629 : 420.0) no description available & (at2g44450 : 339.0) beta glucosidase 15 (BGLU15); FUNCTIONS IN: cation binding
Medtr1g018200	'10.6.2'	'cell wall.degradation.mannan-xylose-arabinose-fucose'	beta-galactosidase activity
Medtr1g087240	'10.6.2'	'cell wall.degradation.mannan-xylose-arabinose-fucose'	hydrolyzing O-glycosyl compounds; INVOLVED IN: carbohydrate metabolic process; LOCATED IN: plant-type cell wall; EXPRESSED IN: 23 plant structures; EXPRESSED DURING: 13 growth stages; CONTAINS InterPro DOMAIN/s: Glycoside hydrolase
Medtr1g102230	'10.6.2'	'cell wall.degradation.mannan-xylose-arabinose-fucose'	at least when heterologously expressed in <i>Pichia pastoris</i>. The enzyme has been postulated to act on fucosylated substrates other than xyloglucan oligosaccharides. was shown (<i>Pichia pastoris</i>) to hydrolyze fucose in 3- and 4-linkage
Medtr1g106860	'10.6.2'	'cell wall.degradation.mannan-xylose-arabinose-fucose'	hydrolyzing O-glycosyl compounds; INVOLVED IN: carbohydrate metabolic process; LOCATED IN: cell wall; EXPRESSED IN: 14 plant structures; EXPRESSED DURING: LP.04 four leaves visible
Medtr3g074060	'10.6.2'	'cell wall.degradation.mannan-xylose-arabinose-fucose'	hydrolyzing O-glycosyl compounds; INVOLVED IN: carbohydrate metabolic process; LOCATED IN: apoplast
Medtr3g103610	'10.6.2'	'cell wall.degradation.mannan-xylose-arabinose-fucose'	4-beta-xylanase activity
Medtr4g094285	'10.6.2'	'cell wall.degradation.mannan-xylose-arabinose-fucose'	4-beta-xylosidase activity
Medtr5g020890	'10.6.2'	'cell wall.degradation.mannan-xylose-arabinose-fucose'	hydrolase activity
Medtr5g030860	'10.6.2'	'cell wall.degradation.mannan-xylose-arabinose-fucose'	4-beta-xylosidase activity
Medtr5g062430	'10.6.2'	'cell wall.degradation.mannan-xylose-arabinose-fucose'	hydrolyzing O-glycosyl compounds; INVOLVED IN: carbohydrate metabolic process; LOCATED IN: apoplast
Medtr7g073550	'10.6.2'	'cell wall.degradation.mannan-xylose-arabinose-fucose'	hydrolase activity
Medtr7g073620	'10.6.2'	'cell wall.degradation.mannan-xylose-arabinose-fucose'	hydrolase activity
Medtr8g005270	'10.6.2'	'cell wall.degradation.mannan-xylose-arabinose-fucose'	hydrolase activity
Medtr8g005670	'10.6.2'	'cell wall.degradation.mannan-xylose-arabinose-fucose'	hydrolase activity
Medtr1g047370	'10.6.3'	'cell wall.degradation.pectate lyases and polygalacturonases'	pectate lyase activity; INVOLVED IN: biological_process unknown; LOCATED IN: endomembrane system; EXPRESSED IN: 20 plant structures; EXPRESSED DURING: 6 growth stages; CONTAINS InterPro DOMAIN/s: Pectin lyase fold/virulence factor (InterPro:IPR011050)
Medtr1g067450	'10.6.3'	'cell wall.degradation.pectate lyases and polygalacturonases'	AmbAllergen (InterPro:IPR018082)
Medtr1g111590	'10.6.3'	'cell wall.degradation.pectate lyases and polygalacturonases'	AmbAllergen (InterPro:IPR018082)
Medtr2g103410	'10.6.3'	'cell wall.degradation.pectate lyases and polygalacturonases'	Pectin lyase fold (InterPro:IPR012334)
Medtr3g075320	'10.6.3'	'cell wall.degradation.pectate lyases and polygalacturonases'	AmbAllergen (InterPro:IPR018082)
Medtr3g078090	'10.6.3'	'cell wall.degradation.pectate lyases and polygalacturonases'	T
Medtr3g111380	'10.6.3'	'cell wall.degradation.pectate lyases and polygalacturonases'	Carbohydrate-binding-like fold (InterPro:IPR013784)
Medtr3g437820	'10.6.3'	'cell wall.degradation.pectate lyases and polygalacturonases'	defense response; LOCATED IN: cell wall
Medtr3g449590	'10.6.3'	'cell wall.degradation.pectate lyases and polygalacturonases'	Glycoside hydrolase
Medtr4g094435	'10.6.3'	'cell wall.degradation.pectate lyases and polygalacturonases'	transcription factor binding; INVOLVED IN: biological_process unknown; LOCATED IN: endomembrane system; CONTAINS InterPro DOMAIN/s: Leucine-rich repeat-containing N-terminal domain
Medtr4g094440	'10.6.3'	'cell wall.degradation.pectate lyases and polygalacturonases'	defense response; LOCATED IN: cell wall
Medtr5g034090	'10.6.3'	'cell wall.degradation.pectate lyases and polygalacturonases'	Pectin lyase fold (InterPro:IPR012334)
Medtr5g034320	'10.6.3'	'cell wall.degradation.pectate lyases and polygalacturonases'	T
Medtr7g023730	'10.6.3'	'cell wall.degradation.pectate lyases and polygalacturonases'	signal transduction
Medtr7g033475	'10.6.3'	'cell wall.degradation.pectate lyases and polygalacturonases'	defense response; LOCATED IN: cell wall
Medtr7g059290	'10.6.3'	'cell wall.degradation.pectate lyases and polygalacturonases'	pectate lyase activity; INVOLVED IN: biological_process unknown; LOCATED IN: endomembrane system; EXPRESSED IN: 20 plant structures; EXPRESSED DURING: 6 growth stages; CONTAINS InterPro DOMAIN/s: Pectin lyase fold/virulence factor (InterPro:IPR011050)
Medtr7g091850	'10.6.3'	'cell wall.degradation.pectate lyases and polygalacturonases'	the outer walls of the four meiotic products of the pollen mother cell are fused
Medtr7g110710	'10.6.3'	'cell wall.degradation.pectate lyases and polygalacturonases'	carbohydrate metabolic process; LOCATED IN: vacuole; EXPRESSED IN: 25 plant structures; EXPRESSED DURING: 15 growth stages; CONTAINS InterPro DOMAIN/s: Pectin lyase fold/virulence factor (InterPro:IPR011050)
Medtr8g064500	'10.6.3'	'cell wall.degradation.pectate lyases and polygalacturonases'	T
Medtr8g064530	'10.6.3'	'cell wall.degradation.pectate lyases and polygalacturonases'	T
Medtr8g064560	'10.6.3'	'cell wall.degradation.pectate lyases and polygalacturonases'	T
Medtr8g065030	'10.6.3'	'cell wall.degradation.pectate lyases and polygalacturonases'	Pectin lyase fold (InterPro:IPR012334)
Medtr0122s0020	'10.7'	'cell wall.modification'	2004. Plant Mol Bio). Involved in the formation of nematode-induced syncytia in roots of Arabidopsis thaliana.; expansin B3 (EXPB3); INVOLVED IN: response to cyclopentenone
Medtr1g105495	'10.7'	'cell wall.modification'	acting on glycosyl bonds
Medtr2g089140	'10.7'	'cell wall.modification'	flower buds
Medtr2g090265	'10.7'	'cell wall.modification'	2004. Plant Mol Bio). Involved in the formation of nematode-induced syncytia in roots of Arabidopsis thaliana.; expansin B3 (EXPB3); INVOLVED IN: response to cyclopentenone
Medtr2g095800	'10.7'	'cell wall.modification'	acting on glycosyl bonds
Medtr2g097030	'10.7'	'cell wall.modification'	2004. Plant Mol Bio). Involved in the formation of nematode-induced syncytia in roots of Arabidopsis thaliana.; expansin A4 (EXPA4); CONTAINS InterPro DOMAIN/s: Barwin-related endoglucanase (InterPro:IPR009009)
Medtr3g064510	'10.7'	'cell wall.modification'	2004. Plant Mol Bio); expansin A13 (EXPA13); INVOLVED IN: plant-type cell wall modification involved in multidimensional cell growth
Medtr3g094060	'10.7'	'cell wall.modification'	2004. Plant Mol Bio). Involved in the formation of nematode-induced syncytia in roots of Arabidopsis thaliana.; expansin A8 (EXPA8); INVOLVED IN: plant-type cell wall modification involved in multidimensional cell growth
Medtr4g063975	'10.7'	'cell wall.modification'	2004. Plant Mol Bio). Involved in the formation of nematode-induced syncytia in roots of Arabidopsis thaliana.; expansin A4 (EXPA4); CONTAINS InterPro DOMAIN/s: Barwin-related endoglucanase (InterPro:IPR009009)
Medtr4g081950	'10.7'	'cell wall.modification'	2004. Plant Mol Bio). Involved in the formation of nematode-induced syncytia in roots of Arabidopsis thaliana.; expansin A15 (EXPA15); INVOLVED IN: plant-type cell wall modification involved in multidimensional cell growth
Medtr4g097640	'10.7'	'cell wall.modification'	acting on glycosyl bonds
Medtr4g097670	'10.7'	'cell wall.modification'	acting on glycosyl bonds
Medtr4g097700	'10.7'	'cell wall.modification'	acting on glycosyl bonds
Medtr5g041700	'10.7'	'cell wall.modification'	2004. Plant Mol Bio). Involved in the formation of nematode-induced syncytia in roots of Arabidopsis thaliana.; expansin A15 (EXPA15); INVOLVED IN: plant-type cell wall modification involved in multidimensional cell growth
Medtr5g076950	'10.7'	'cell wall.modification'	2004. Plant Mol Bio); expansin A13 (EXPA13); INVOLVED IN: plant-type cell wall modification involved in multidimensional cell growth
Medtr6g012500	'10.7'	'cell wall.modification'	2004. Plant Mol Bio); expansin A5 (EXPA5); INVOLVED IN: plant-type cell wall modification involved in multidimensional cell growth
Medtr6g012520	'10.7'	'cell wall.modification'	2004. Plant Mol Bio); expansin A5 (EXPA5); INVOLVED IN: plant-type cell wall modification involved in multidimensional cell growth
Medtr6g033055	'10.7'	'cell wall.modification'	endoxyloglucan transferase
Medtr7g011060	'10.7'	'cell wall.modification'	2004. Plant Mol Bio); expansin A5 (EXPA5); INVOLVED IN: plant-type cell wall modification involved in multidimensional cell growth
Medtr7g056090	'10.7'	'cell wall.modification'	acting on glycosyl bonds
Medtr7g102260	'10.7'	'cell wall.modification'	acting on glycosyl bonds
Medtr8g081040	'10.7'	'cell wall.modification'	acting on glycosyl bonds
Medtr8g102910	'10.7'	'cell wall.modification'	acting on glycosyl bonds
Medtr0618s0020	'10.8.1'	'cell wall.pectin*esterases.PME'	pectinesterase activity; INVOLVED IN: cell wall modification; LOCATED IN: membrane
Medtr1g008140	'10.8.1'	'cell wall.pectin*esterases.PME'	active site (InterPro:IPR018040)
Medtr1g026410	'10.8.1'	'cell wall.pectin*esterases.PME'	copper ion binding; INVOLVED IN: oxidation reduction; LOCATED IN: apoplast
Medtr2g044810	'10.8.1'	'cell wall.pectin*esterases.PME'	catalytic & (at2g26440 : 637.0) Plant invertase/pectin methylesterase inhibitor superfamily; FUNCTIONS IN: enzyme inhibitor activity
Medtr2g044880	'10.8.1'	'cell wall.pectin*esterases.PME'	pectinesterase activity; INVOLVED IN: cell wall modification; LOCATED IN: endomembrane system
Medtr2g088080	'10.8.1'	'cell wall.pectin*esterases.PME'	copper ion binding; INVOLVED IN: oxidation reduction; LOCATED IN: apoplast
Medtr3g010770	'10.8.1'	'cell wall.pectin*esterases.PME'	pectinesterase activity; INVOLVED IN: cell wall modification; LOCATED IN: endomembrane system
Medtr3g091380	'10.8.1'	'cell wall.pectin*esterases.PME'	pectinesterase activity; INVOLVED IN: cell wall modification; LOCATED IN: cell wall
Medtr3g095920	'10.8.1'	'cell wall.pectin*esterases.PME'	pectinesterase activity; INVOLVED IN: cell wall modification; LOCATED IN: cell wall
Medtr6g012800	'10.8.1'	'cell wall.pectin*esterases.PME'	plant-type cell wall; EXPRESSED IN: 23 plant structures; EXPRESSED DURING: 13 growth stages; CONTAINS InterPro DOMAIN/s: Pectinesterase
Medtr7g050870	'10.8.1'	'cell wall.pectin*esterases.PME'	pectinesterase activity; INVOLVED IN: cell wall modification; LOCATED IN: cell wall
Medtr7g050950	'10.8.1'	'cell wall.pectin*esterases.PME'	pectinesterase activity; INVOLVED IN: cell wall modification; LOCATED IN: cell wall
Medtr7g108905	'10.8.1'	'cell wall.pectin*esterases.PME'	pectinesterase activity; INVOLVED IN: cell wall modification; LOCATED IN: endomembrane system
Medtr8g023150	'10.8.1'	'cell wall.pectin*esterases.PME'	plasma membrane
Medtr8g093460	'10.8.1'	'cell wall.pectin*esterases.PME'	pectinesterase activity; INVOLVED IN: cell wall modification; LOCATED IN: cell wall
Medtr8g104580	'10.8.1'	'cell wall.pectin*esterases.PME'	pectinesterase activity; INVOLVED IN: cell wall modification; LOCATED IN: endomembrane system
Medtr8g104645	'10.8.1'	'cell wall.pectin*esterases.PME'	pectinesterase activity; INVOLVED IN: cell wall modification; LOCATED IN: endomembrane system
Medtr8g104655	'10.8.1'	'cell wall.pectin*esterases.PME'	pectinesterase activity; INVOLVED IN: cell wall modification; LOCATED IN: endomembrane system
Medtr1g085620	'10.8.2'	'cell wall.pectin*esterases.acetyl esterase'	T
Medtr7g060760	'10.8.2'	'cell wall.pectin*esterases.acetyl esterase'	T
Medtr7g110900	'10.8.2'	'cell wall.pectin*esterases.acetyl esterase'	T
Medtr7g115450	'10.8.2'	'cell wall.pectin*esterases.acetyl esterase'	carboxylesterase activity; INVOLVED IN: cytoskeleton organization; LOCATED IN: plant-type cell wall; EXPRESSED IN: 23 plant structures; EXPRESSED DURING: 13 growth stages; CONTAINS InterPro DOMAIN/s: Pectinacetylesterase (InterPro:IPR004963)
Medtr7g115470	'10.8.2'	'cell wall.pectin*esterases.acetyl esterase'	carboxylesterase activity; INVOLVED IN: cytoskeleton organization; LOCATED IN: plant-type cell wall; EXPRESSED IN: 23 plant structures; EXPRESSED DURING: 13 growth stages; CONTAINS InterPro DOMAIN/s: Pectinacetylesterase (InterPro:IPR004963)
Medtr8g072000	'10.8.2'	'cell wall.pectin*esterases.acetyl esterase'	T
Medtr7g051440	'10.8.99'	'cell wall.pectin*esterases.misc'	copper ion binding; INVOLVED IN: oxidation reduction; LOCATED IN: plasma membrane; EXPRESSED IN: 23 plant structures; EXPRESSED DURING: 13 growth stages; CONTAINS InterPro DOMAIN/s: Multicopper oxidase
Medtr5g083520	'11.1.1'	'lipid metabolism.FA synthesis and FA elongation.Acetyl CoA Carboxylation'	Biotin/lipoyl attachment (InterPro:IPR000089)
Medtr2g103280	'11.1.1.2.3'	'lipid metabolism.FA synthesis and FA elongation.Acetyl CoA Carboxylation.heteromeric Complex.Biotin Carboxyl Carrier Protein'	Biotin/lipoyl attachment (InterPro:IPR000089); BEST Arabidopsis thaliana protein match is: Single hybrid motif superfamily protein (TAIR:AT1G52670.1); Has 3111 Blast hits to 3110 proteins in 1263 species: Archae - 10; Bacteria - 2402; Metazoa - 8; Fungi - 0; Plants - 130; Viruses - 0; Other Eukaryotes - 561 (source: NCBI BLink). & (reliability: 440.0) & (original description: no original descript…
Medtr6g015020	'11.1.1.2.3'	'lipid metabolism.FA synthesis and FA elongation.Acetyl CoA Carboxylation.heteromeric Complex.Biotin Carboxyl Carrier Protein'	; biotin carboxyl carrier protein 2 (BCCP2); FUNCTIONS IN: biotin binding; INVOLVED IN: fatty acid biosynthetic process; LOCATED IN: chloroplast; EXPRESSED IN: 21 plant structures; EXPRESSED DURING: 13 growth stages; CONTAINS InterPro DOMAIN/s: Biotin-binding site (InterPro:IPR001882)
Medtr7g013100	'11.1.1.2.3'	'lipid metabolism.FA synthesis and FA elongation.Acetyl CoA Carboxylation.heteromeric Complex.Biotin Carboxyl Carrier Protein'	; biotin carboxyl carrier protein 2 (BCCP2); FUNCTIONS IN: biotin binding; INVOLVED IN: fatty acid biosynthetic process; LOCATED IN: chloroplast; EXPRESSED IN: 21 plant structures; EXPRESSED DURING: 13 growth stages; CONTAINS InterPro DOMAIN/s: Biotin-binding site (InterPro:IPR001882)
Medtr7g080290	'11.1.1.2.3'	'lipid metabolism.FA synthesis and FA elongation.Acetyl CoA Carboxylation.heteromeric Complex.Biotin Carboxyl Carrier Protein'	chloroplast precursor (BCCP) - Glycine max (Soybean) & (at5g16390 : 179.0) Encodes for the biotin carboxyl-carrier subunit of the multi-enzyme plastidial acetyl-coenzyme A carboxylase complex.; BIOTIN CARBOXYL-CARRIER PROTEIN 1 (BCCP-1); FUNCTIONS IN: acetyl-CoA carboxylase activity
Medtr1g041085	'11.1.10'	'lipid metabolism.FA synthesis and FA elongation.beta ketoacyl CoA synthase'	a member of the 3-ketoacyl-CoA synthase family involved in the biosynthesis of VLCFA (very long chain fatty acids).; 3-ketoacyl-CoA synthase 2 (KCS2); FUNCTIONS IN: fatty acid elongase activity; INVOLVED IN: response to wounding
Medtr1g076430	'11.1.10'	'lipid metabolism.FA synthesis and FA elongation.beta ketoacyl CoA synthase'	a member of the 3-ketoacyl-CoA synthase family involved in the biosynthesis of VLCFA (very long chain fatty acids).; 3-ketoacyl-CoA synthase 2 (KCS2); FUNCTIONS IN: fatty acid elongase activity; INVOLVED IN: response to wounding
Medtr1g115560	'11.1.10'	'lipid metabolism.FA synthesis and FA elongation.beta ketoacyl CoA synthase'	a member of the 3-ketoacyl-CoA synthase family involved in the biosynthesis of VLCFA (very long chain fatty acids).; 3-ketoacyl-CoA synthase 19 (KCS19); FUNCTIONS IN: transferase activity
Medtr2g054940	'11.1.10'	'lipid metabolism.FA synthesis and FA elongation.beta ketoacyl CoA synthase'	a member of the 3-ketoacyl-CoA synthase family involved in the biosynthesis of VLCFA (very long chain fatty acids).; 3-ketoacyl-CoA synthase 11 (KCS11); FUNCTIONS IN: transferase activity
Medtr4g062190	'11.1.10'	'lipid metabolism.FA synthesis and FA elongation.beta ketoacyl CoA synthase'	a member of the 3-ketoacyl-CoA synthase family involved in the biosynthesis of VLCFA (very long chain fatty acids).; 3-ketoacyl-CoA synthase 12 (KCS12); FUNCTIONS IN: transferase activity
Medtr4g113280	'11.1.10'	'lipid metabolism.FA synthesis and FA elongation.beta ketoacyl CoA synthase'	a member of the 3-ketoacyl-CoA synthase family involved in the biosynthesis of VLCFA (very long chain fatty acids).; 3-ketoacyl-CoA synthase 11 (KCS11); FUNCTIONS IN: transferase activity
Medtr7g118170	'11.1.10'	'lipid metabolism.FA synthesis and FA elongation.beta ketoacyl CoA synthase'	acyltransferase activity; INVOLVED IN: in 7 processes; LOCATED IN: cytosolic ribosome
Medtr2g020360	'11.1.12'	'lipid metabolism.FA synthesis and FA elongation.ACP protein'	chloroplast precursor (Acyl carrier protein II) (ACP II) - Hordeum vulgare (Barley) & (gnl|cdd|36959 : 101.0) no description available & (at1g54580 : 86.7) encodes an acyl carrier protein expressed in leaves
Medtr7g080390	'11.1.12'	'lipid metabolism.FA synthesis and FA elongation.ACP protein'	it is likely to be involved in fatty acid or lipoic acid biogenesis.; mitochondrial acyl carrier protein 2 (mtACP2); FUNCTIONS IN: acyl carrier activity
Medtr7g080760	'11.1.12'	'lipid metabolism.FA synthesis and FA elongation.ACP protein'	it is likely to be involved in fatty acid or lipoic acid biogenesis. Its acylated form is predominantly present in the mitochondrial membrane while the non-acylated form is soluble.; mitochondrial acyl carrier protein 1 (MTACP-1); FUNCTIONS IN: phosphopantetheine binding
Medtr5g024130	'11.1.15'	'lipid metabolism.FA synthesis and FA elongation.ACP desaturase'	chloroplast precursor (EC 1.14.19.2) (Stearoyl-ACP desaturase) - Glycine max (Soybean) & (at2g43710 : 660.0) Encodes a stearoyl-ACP desaturase
Medtr3g031380	'11.1.2'	'lipid metabolism.FA synthesis and FA elongation.Acetyl CoA Transacylase'	transferase activity
Medtr1g069385	'11.1.3'	'lipid metabolism.FA synthesis and FA elongation.ketoacyl ACP synthase'	transferring acyl groups other than amino-acyl groups
Medtr1g103020	'11.1.3'	'lipid metabolism.FA synthesis and FA elongation.ketoacyl ACP synthase'	; 3-ketoacyl-acyl carrier protein synthase I (KAS I); FUNCTIONS IN: transferase activity
Medtr2g043530	'11.1.3'	'lipid metabolism.FA synthesis and FA elongation.ketoacyl ACP synthase'	involved in fatty acid elongation from 16:0-ACP to 18:0-ACP. Homozygous knock-out mutants are embryo lethal
Medtr4g096690	'11.1.3'	'lipid metabolism.FA synthesis and FA elongation.ketoacyl ACP synthase'	; 3-ketoacyl-acyl carrier protein synthase I (KAS I); FUNCTIONS IN: transferase activity
Medtr5g014140	'11.1.30'	'lipid metabolism.FA synthesis and FA elongation.pyruvate kinase'	chloroplast precursor (EC 2.7.1.40) - Nicotiana tabacum (Common tobacco) & (at1g32440 : 684.0) encodes a chloroplast pyruvate kinase beta subunit. The enzyme is less active than the other chloroplast pyruvate kinase beta subunit encoded by AT5G52920. Involved in seed oil biosynthesis. Can partially complement the AT5G52920 mutant.; plastidial pyruvate kinase 3 (PKp3); FUNCTIONS IN: pyruvate kinas…
Medtr3g085740	'11.1.4'	'lipid metabolism.FA synthesis and FA elongation.ACP oxoacyl reductase'	chloroplast precursor (EC 1.1.1.100) (3-ketoacyl-acyl carrier protein reductase 1) (Beta-keto acyl-carrier protein reductase 1) - Brassica napus (Rape) & (at1g24360 : 332.0) NAD(P)-binding Rossmann-fold superfamily protein; FUNCTIONS IN: 3-oxoacyl-[acyl-carrier-protein] reductase activity
Medtr2g008620	'11.1.5'	'lipid metabolism.FA synthesis and FA elongation.beta hydroxyacyl ACP dehydratase'	3-hydroxyacyl-[acyl-carrier-protein] dehydratase activity; INVOLVED IN: fatty acid biosynthetic process; LOCATED IN: cell wall
Medtr4g094265	'11.1.5'	'lipid metabolism.FA synthesis and FA elongation.beta hydroxyacyl ACP dehydratase'	3-hydroxyacyl-[acyl-carrier-protein] dehydratase activity; INVOLVED IN: defense response to fungus
Medtr4g074950	'11.1.6'	'lipid metabolism.FA synthesis and FA elongation.enoyl ACP reductase'	mod1
Medtr3g064420	'11.1.8'	'lipid metabolism.FA synthesis and FA elongation.acyl coa ligase'	T
Medtr5g023730	'11.1.8'	'lipid metabolism.FA synthesis and FA elongation.acyl coa ligase'	conserved site (InterPro:IPR020845)
Medtr8g074120	'11.1.8'	'lipid metabolism.FA synthesis and FA elongation.acyl coa ligase'	conserved site (InterPro:IPR020845)
Medtr8g083170	'11.1.8'	'lipid metabolism.FA synthesis and FA elongation.acyl coa ligase'	AMP-binding
Medtr1g034360	'11.1.9'	'lipid metabolism.FA synthesis and FA elongation.long chain fatty acid CoA ligase'	conserved site (InterPro:IPR020845)
Medtr4g068670	'11.1.9'	'lipid metabolism.FA synthesis and FA elongation.long chain fatty acid CoA ligase'	conserved site (InterPro:IPR020845)
Medtr7g109830	'11.1.9'	'lipid metabolism.FA synthesis and FA elongation.long chain fatty acid CoA ligase'	involved in cuticular wax and cutin biosynthesis; LONG-CHAIN ACYL-COA SYNTHASE 1 (LACS1); FUNCTIONS IN: long-chain fatty acid-CoA ligase activity
Medtr4g115920	'11.10.1'	'lipid metabolism.glycolipid synthesis.MGDG synthase'	and in non-photosynthetic tissues. Does not contribute to galactolipid synthesis under Pi-sufficient conditions but does under Pi starvation.; monogalactosyldiacylglycerol synthase 2 (MGD2); CONTAINS InterPro DOMAIN/s: Monogalactosyldiacylglycerol synthase (InterPro:IPR009695)
Medtr7g067340	'11.10.4'	'lipid metabolism.glycolipid synthesis.sulfolipid synthase'	UDP-sulfoquinovose:DAG sulfoquinovosyltransferase activity
Medtr4g010150	'11.2.1'	'lipid metabolism.FA desaturation.desaturase'	type 1
Medtr4g094525	'11.2.2'	'lipid metabolism.FA desaturation.a hydroxylase'	required for the AtBI-1-mediated suppression of programmed cell death.; fatty acid hydroxylase 1 (FAH1); FUNCTIONS IN: fatty acid alpha-hydroxylase activity
Medtr4g015630	'11.2.3'	'lipid metabolism.FA desaturation.omega 3 desaturase'	chloroplast precursor (EC 1.14.19.-) - Glycine max (Soybean) & (at5g05580 : 599.0) Encodes a temperature sensitive plastidic fatty acid desaturase.; fatty acid desaturase 8 (FAD8); CONTAINS InterPro DOMAIN/s: Protein of unknown function DUF3474 (InterPro:IPR021863)
Medtr7g093200	'11.2.4'	'lipid metabolism.FA desaturation.omega 6 desaturase'	endoplasmic reticulum isozyme 2 (EC 1.14.19.-) - Glycine max (Soybean) & (at3g12120 : 618.0) Major enzyme responsible for the synthesis of 18:2 fatty acids in the endoplasmic reticulum. Contains His-rich motifs
Medtr1g086650	'11.3'	'lipid metabolism.Phospholipid synthesis'	T
Medtr4g415290	'11.3'	'lipid metabolism.Phospholipid synthesis'	T
Medtr5g061520	'11.3'	'lipid metabolism.Phospholipid synthesis'	T
Medtr6g069600	'11.3'	'lipid metabolism.Phospholipid synthesis'	phosphoethanolamine N-methyltransferase activity; INVOLVED IN: metabolic process; EXPRESSED IN: guard cell; CONTAINS InterPro DOMAIN/s: Methyltransferase type 11 (InterPro:IPR013216); BEST Arabidopsis thaliana protein match is: S-adenosyl-L-methionine-dependent methyltransferases superfamily protein (TAIR:AT3G18000.1); Has 22304 Blast hits to 21648 proteins in 2625 species: Archae - 587; Bacteria…
Medtr7g067380	'11.3'	'lipid metabolism.Phospholipid synthesis'	T
Medtr7g112680	'11.3'	'lipid metabolism.Phospholipid synthesis'	Tafazzin (InterPro:IPR000872); BEST Arabidopsis thaliana protein match is: Phospholipid/glycerol acyltransferase family protein (TAIR:AT1G78690.1); Has 35333 Blast hits to 34131 proteins in 2444 species: Archae - 798; Bacteria - 22429; Metazoa - 974; Fungi - 991; Plants - 531; Viruses - 0; Other Eukaryotes - 9610 (source: NCBI BLink). & (gnl|cdd|38058 : 293.0) no description available & (gnl|cdd|…
Medtr8g030620	'11.3'	'lipid metabolism.Phospholipid synthesis'	acyltransferase activity; INVOLVED IN: metabolic process
Medtr8g107370	'11.3'	'lipid metabolism.Phospholipid synthesis'	phosphoethanolamine N-methyltransferase activity; INVOLVED IN: phosphatidylcholine biosynthetic process; EXPRESSED IN: sperm cell
Medtr6g039820	'11.3.2'	'lipid metabolism.Phospholipid synthesis.choline kinase'	whose expression is induced by high salt and mannitol.; Protein kinase superfamily protein; CONTAINS InterPro DOMAIN/s: Choline/ethanolamine kinase (InterPro:IPR002573)
Medtr6g040230	'11.3.2'	'lipid metabolism.Phospholipid synthesis.choline kinase'	whose expression is induced by high salt and mannitol.; Protein kinase superfamily protein; CONTAINS InterPro DOMAIN/s: Choline/ethanolamine kinase (InterPro:IPR002573)
Medtr4g045973	'11.3.5'	'lipid metabolism.Phospholipid synthesis.diacylglycerol kinase'	catalytic domain (InterPro:IPR001206)
Medtr4g064813	'11.3.6'	'lipid metabolism.Phospholipid synthesis.choline-phosphate cytidylyltransferase'	Cytidyltransferase-related (InterPro:IPR004821)
Medtr1g073700	'11.3.7'	'lipid metabolism.Phospholipid synthesis.cyclopropane-fatty-acyl-phospholipid synthase'	Cyclopropane-fatty-acyl-phospholipid/mycolic acid synthase (InterPro:IPR003333)
Medtr7g090970	'11.5.2'	'lipid metabolism.glyceral metabolism.Glycerol-3-phosphate dehydrogenase (NAD+)'	auxotrophic for glycerol/G3P due to a loss-of-function mutation in the gpsA gene.; GPDHC1; CONTAINS InterPro DOMAIN/s: 6-phosphogluconate dehydrogenase
Medtr1g050720	'11.5.3'	'lipid metabolism.glyceral metabolism.FAD-dependent glycerol-3-phosphate dehydrogenase'	and in glycerol-3-phosphate shuttle which transports reducing power from cytosol to mitochondrion.; SUGAR-DEPENDENT 6 (SDP6); FUNCTIONS IN: glycerol-3-phosphate dehydrogenase activity; INVOLVED IN: glycerophosphate shuttle
Medtr3g085210	'11.6'	'lipid metabolism.lipid transfer proteins etc'	a lipid transfer protein with a predicted GPI (glycosylphosphatidylinositol)-anchor domain. Localized in the plasma membrane. Disruption of the LTPG1 gene causes alterations of cuticular lipid composition
Medtr4g027800	'11.6'	'lipid metabolism.lipid transfer proteins etc'	basic
Medtr4g027840	'11.6'	'lipid metabolism.lipid transfer proteins etc'	basic
Medtr4g428370	'11.6'	'lipid metabolism.lipid transfer proteins etc'	At2g38530/LTP2
Medtr7g014880	'11.6'	'lipid metabolism.lipid transfer proteins etc'	anchored to membrane; EXPRESSED IN: 21 plant structures; EXPRESSED DURING: 13 growth stages; CONTAINS InterPro DOMAIN/s: Bifunctional inhibitor/plant lipid transfer protein/seed storage (InterPro:IPR016140)
Medtr8g085560	'11.6'	'lipid metabolism.lipid transfer proteins etc'	Plant lipid transfer protein/seed storage/trypsin-alpha amylase inhibitor (InterPro:IPR003612)
Medtr7g114340	'11.7'	'lipid metabolism.unassigned'	transferring acyl groups other than amino-acyl groups
Medtr2g081810	'11.8'	'lipid metabolism.'exotics'(steroids	'(at5g54500 : 315.0) Encodes a flavin mononucleotide-binding flavodoxin-like quinone reductase that is a primary auxin-response gene.; flavodoxin-like quinone reductase 1 (FQR1); CONTAINS InterPro DOMAIN/s: NADPH-dependent FMN reductase (InterPro:IPR005025)
Medtr4g069250	'11.8'	'lipid metabolism.'exotics'(steroids	'(at4g36750 : 278.0) Quinone reductase family protein; FUNCTIONS IN: oxidoreductase activity
Medtr5g019620	'11.8'	'lipid metabolism.'exotics'(steroids	'(at4g36750 : 304.0) Quinone reductase family protein; FUNCTIONS IN: oxidoreductase activity
Medtr8g040730	'11.8'	'lipid metabolism.'exotics'(steroids	'(at5g07010 : 159.0) Encodes a sulfotransferase that acts specifically on 11- and 12-hydroxyjasmonic acid. Transcript levels for this enzyme are increased by treatments with jasmonic acid (JA)
Medtr1g016070	'11.8.1'	'lipid metabolism.'exotics' (steroids	'(at2g46210 : 613.0) Fatty acid/sphingolipid desaturase; FUNCTIONS IN: oxidoreductase activity
Medtr7g113780	'11.8.1'	'lipid metabolism.'exotics' (steroids	'(at3g06470 : 242.0) GNS1/SUR4 membrane protein family; FUNCTIONS IN: molecular_function unknown; INVOLVED IN: biological_process unknown; LOCATED IN: integral to membrane; EXPRESSED IN: 22 plant structures; EXPRESSED DURING: 13 growth stages; CONTAINS InterPro DOMAIN/s: GNS1/SUR4 membrane protein (InterPro:IPR002076); BEST Arabidopsis thaliana protein match is: GNS1/SUR4 membrane protein family …
Medtr8g056100	'11.8.1'	'lipid metabolism.'exotics' (steroids	'(at2g46210 : 652.0) Fatty acid/sphingolipid desaturase; FUNCTIONS IN: oxidoreductase activity
Medtr5g096890	'11.8.1.1'	'lipid metabolism.'exotics' (steroids	'(at1g07380 : 1175.0) Neutral/alkaline non-lysosomal ceramidase; FUNCTIONS IN: ceramidase activity; INVOLVED IN: biological_process unknown; LOCATED IN: plasma membrane; EXPRESSED IN: 23 plant structures; EXPRESSED DURING: 13 growth stages; CONTAINS InterPro DOMAIN/s: Neutral/alkaline nonlysosomal ceramidase (InterPro:IPR006823); BEST Arabidopsis thaliana protein match is: Neutral/alkaline non-ly…
Medtr3g103300	'11.8.10'	'lipid metabolism.'exotics' (steroids	'(at1g27480 : 521.0) alpha/beta-Hydrolases superfamily protein; FUNCTIONS IN: phosphatidylcholine-sterol O-acyltransferase activity; INVOLVED IN: lipid metabolic process; LOCATED IN: plasma membrane
Medtr8g019570	'11.8.10'	'lipid metabolism.'exotics' (steroids	'(at5g13640 : 1055.0) arabidopsis phospholipid:diacylglycerol acyltransferase (PDAT); phospholipid:diacylglycerol acyltransferase (PDAT); FUNCTIONS IN: phosphatidylcholine-sterol O-acyltransferase activity
Medtr5g035190	'11.8.2'	'lipid metabolism.'exotics' (steroids	'(at2g29390 : 356.0) Encodes a sterol 4-alpha-methyl-oxidase
Medtr8g063210	'11.8.2'	'lipid metabolism.'exotics' (steroids	'(at2g29390 : 426.0) Encodes a sterol 4-alpha-methyl-oxidase
Medtr6g093180	'11.8.6'	'lipid metabolism.'exotics' (steroids	'(gnl|cdd|35718 : 1146.0) no description available & (at2g07050 : 1010.0) Involved in the biosynthesis of brassinosteroids. Catalyzes the reaction from epoxysqualene to cycloartenol.; cycloartenol synthase 1 (CAS1); FUNCTIONS IN: cycloartenol synthase activity; INVOLVED IN: pentacyclic triterpenoid biosynthetic process
Medtr4g071520	'11.8.8'	'lipid metabolism.'exotics' (steroids	'(at4g34640 : 655.0) Encodes squalene synthase
Medtr4g080823	'11.9'	'lipid metabolism.lipid degradation'	Glucose-methanol-choline oxidoreductase
Medtr2g015590	'11.9.2'	'lipid metabolism.lipid degradation.lipases'	acting on ester bonds
Medtr4g080100	'11.9.2'	'lipid metabolism.lipid degradation.lipases'	class 3 (InterPro:IPR002921); BEST Arabidopsis thaliana protein match is: alpha/beta-Hydrolases superfamily protein (TAIR:AT4G18550.1); Has 772 Blast hits to 765 proteins in 118 species: Archae - 0; Bacteria - 26; Metazoa - 4; Fungi - 158; Plants - 461; Viruses - 1; Other Eukaryotes - 122 (source: NCBI BLink). & (gnl|cdd|39769 : 187.0) no description available & (gnl|cdd|73213 : 112.0) no descrip…
Medtr4g099510	'11.9.2.1'	'lipid metabolism.lipid degradation.lipases.triacylglycerol lipase'	glycolipids as well as triacylglycerols.; alpha/beta-Hydrolases superfamily protein; FUNCTIONS IN: galactolipase activity
Medtr5g017260	'11.9.2.1'	'lipid metabolism.lipid degradation.lipases.triacylglycerol lipase'	class 3 (InterPro:IPR002921); BEST Arabidopsis thaliana protein match is: alpha/beta-Hydrolases superfamily protein (TAIR:AT1G56630.1); Has 1515 Blast hits to 1509 proteins in 328 species: Archae - 0; Bacteria - 466; Metazoa - 48; Fungi - 299; Plants - 385; Viruses - 5; Other Eukaryotes - 312 (source: NCBI BLink). & (gnl|cdd|73213 : 137.0) no description available & (gnl|cdd|39769 : 127.0) no des…
Medtr5g056550	'11.9.3'	'lipid metabolism.lipid degradation.lysophospholipases'	T
Medtr3g107360	'11.9.3.1'	'lipid metabolism.lipid degradation.lysophospholipases.phospholipase D'	phosphatidylinositol-4
Medtr3g012440	'11.9.3.2'	'lipid metabolism.lipid degradation.lysophospholipases.carboxylesterase'	petal differentiation and expansion stage; CONTAINS InterPro DOMAIN/s: Lipase
Medtr3g101420	'11.9.3.2'	'lipid metabolism.lipid degradation.lysophospholipases.carboxylesterase'	hypocotyl
Medtr4g011320	'11.9.3.2'	'lipid metabolism.lipid degradation.lysophospholipases.carboxylesterase'	carboxylesterase activity; INVOLVED IN: biological_process unknown; EXPRESSED IN: 11 plant structures; EXPRESSED DURING: 7 growth stages; CONTAINS InterPro DOMAIN/s: Phospholipase/carboxylesterase (InterPro:IPR003140); BEST Arabidopsis thaliana protein match is: alpha/beta-Hydrolases superfamily protein (TAIR:AT3G15650.2); Has 2146 Blast hits to 2133 proteins in 591 species: Archae - 4; Bacteria …
Medtr4g086470	'11.9.3.2'	'lipid metabolism.lipid degradation.lysophospholipases.carboxylesterase'	4-D-methyl.; CXE12; FUNCTIONS IN: carboxylesterase activity; INVOLVED IN: response to salt stress; LOCATED IN: cytoplasm; EXPRESSED IN: 24 plant structures; EXPRESSED DURING: 14 growth stages; CONTAINS InterPro DOMAIN/s: Lipase
Medtr4g086480	'11.9.3.2'	'lipid metabolism.lipid degradation.lysophospholipases.carboxylesterase'	4-D-methyl.; CXE12; FUNCTIONS IN: carboxylesterase activity; INVOLVED IN: response to salt stress; LOCATED IN: cytoplasm; EXPRESSED IN: 24 plant structures; EXPRESSED DURING: 14 growth stages; CONTAINS InterPro DOMAIN/s: Lipase
Medtr5g005850	'11.9.3.2'	'lipid metabolism.lipid degradation.lysophospholipases.carboxylesterase'	hypocotyl
Medtr7g051020	'11.9.3.2'	'lipid metabolism.lipid degradation.lysophospholipases.carboxylesterase'	hypocotyl
Medtr1g026940	'11.9.3.3'	'lipid metabolism.lipid degradation.lysophospholipases.glycerophosphodiester phosphodiesterase'	constitutive 4)
Medtr1g026990	'11.9.3.3'	'lipid metabolism.lipid degradation.lysophospholipases.glycerophosphodiester phosphodiesterase'	putative; FUNCTIONS IN: transmembrane receptor protein serine/threonine kinase activity
Medtr1g027030	'11.9.3.3'	'lipid metabolism.lipid degradation.lysophospholipases.glycerophosphodiester phosphodiesterase'	protein kinase activity
Medtr1g027050	'11.9.3.3'	'lipid metabolism.lipid degradation.lysophospholipases.glycerophosphodiester phosphodiesterase'	protein kinase activity
Medtr1g027060	'11.9.3.3'	'lipid metabolism.lipid degradation.lysophospholipases.glycerophosphodiester phosphodiesterase'	protein kinase activity
Medtr1g027700	'11.9.3.3'	'lipid metabolism.lipid degradation.lysophospholipases.glycerophosphodiester phosphodiesterase'	putative; FUNCTIONS IN: protein serine/threonine kinase activity
Medtr1g027730	'11.9.3.3'	'lipid metabolism.lipid degradation.lysophospholipases.glycerophosphodiester phosphodiesterase'	PR5-like receptor kinase; PR5-like receptor kinase (PR5K); FUNCTIONS IN: transmembrane receptor protein serine/threonine kinase activity
Medtr1g027820	'11.9.3.3'	'lipid metabolism.lipid degradation.lysophospholipases.glycerophosphodiester phosphodiesterase'	ATP binding site (InterPro:IPR017441)
Medtr1g027840	'11.9.3.3'	'lipid metabolism.lipid degradation.lysophospholipases.glycerophosphodiester phosphodiesterase'	PR5-like receptor kinase; PR5-like receptor kinase (PR5K); FUNCTIONS IN: transmembrane receptor protein serine/threonine kinase activity
Medtr1g027890	'11.9.3.3'	'lipid metabolism.lipid degradation.lysophospholipases.glycerophosphodiester phosphodiesterase'	ATP binding site (InterPro:IPR017441)
Medtr1g027930	'11.9.3.3'	'lipid metabolism.lipid degradation.lysophospholipases.glycerophosphodiester phosphodiesterase'	PR5-like receptor kinase; PR5-like receptor kinase (PR5K); FUNCTIONS IN: transmembrane receptor protein serine/threonine kinase activity
Medtr1g027960	'11.9.3.3'	'lipid metabolism.lipid degradation.lysophospholipases.glycerophosphodiester phosphodiesterase'	ATP binding site (InterPro:IPR017441)
Medtr1g027970	'11.9.3.3'	'lipid metabolism.lipid degradation.lysophospholipases.glycerophosphodiester phosphodiesterase'	ATP binding site (InterPro:IPR017441)
Medtr1g027990	'11.9.3.3'	'lipid metabolism.lipid degradation.lysophospholipases.glycerophosphodiester phosphodiesterase'	ATP binding site (InterPro:IPR017441)
Medtr1g028080	'11.9.3.3'	'lipid metabolism.lipid degradation.lysophospholipases.glycerophosphodiester phosphodiesterase'	constitutive 4)
Medtr1g028100	'11.9.3.3'	'lipid metabolism.lipid degradation.lysophospholipases.glycerophosphodiester phosphodiesterase'	putative; FUNCTIONS IN: transmembrane receptor protein serine/threonine kinase activity
Medtr1g028130	'11.9.3.3'	'lipid metabolism.lipid degradation.lysophospholipases.glycerophosphodiester phosphodiesterase'	constitutive 4)
Medtr1g031220	'11.9.3.3'	'lipid metabolism.lipid degradation.lysophospholipases.glycerophosphodiester phosphodiesterase'	putative; FUNCTIONS IN: protein serine/threonine kinase activity
Medtr1g031450	'11.9.3.3'	'lipid metabolism.lipid degradation.lysophospholipases.glycerophosphodiester phosphodiesterase'	ATP binding site (InterPro:IPR017441)
Medtr1g031460	'11.9.3.3'	'lipid metabolism.lipid degradation.lysophospholipases.glycerophosphodiester phosphodiesterase'	protein kinase activity
Medtr1g031510	'11.9.3.3'	'lipid metabolism.lipid degradation.lysophospholipases.glycerophosphodiester phosphodiesterase'	ATP binding site (InterPro:IPR017441)
Medtr1g031530	'11.9.3.3'	'lipid metabolism.lipid degradation.lysophospholipases.glycerophosphodiester phosphodiesterase'	ATP binding site (InterPro:IPR017441)
Medtr1g031580	'11.9.3.3'	'lipid metabolism.lipid degradation.lysophospholipases.glycerophosphodiester phosphodiesterase'	protein kinase activity
Medtr1g110160	'11.9.3.3'	'lipid metabolism.lipid degradation.lysophospholipases.glycerophosphodiester phosphodiesterase'	putative; FUNCTIONS IN: protein serine/threonine kinase activity
Medtr1g110220	'11.9.3.3'	'lipid metabolism.lipid degradation.lysophospholipases.glycerophosphodiester phosphodiesterase'	putative; FUNCTIONS IN: protein serine/threonine kinase activity
Medtr1g110260	'11.9.3.3'	'lipid metabolism.lipid degradation.lysophospholipases.glycerophosphodiester phosphodiesterase'	ATP binding site (InterPro:IPR017441)
Medtr1g110270	'11.9.3.3'	'lipid metabolism.lipid degradation.lysophospholipases.glycerophosphodiester phosphodiesterase'	putative; FUNCTIONS IN: protein serine/threonine kinase activity
Medtr2g036440	'11.9.3.3'	'lipid metabolism.lipid degradation.lysophospholipases.glycerophosphodiester phosphodiesterase'	protein kinase activity
Medtr2g036480	'11.9.3.3'	'lipid metabolism.lipid degradation.lysophospholipases.glycerophosphodiester phosphodiesterase'	protein kinase activity
Medtr2g036490	'11.9.3.3'	'lipid metabolism.lipid degradation.lysophospholipases.glycerophosphodiester phosphodiesterase'	recognition of pollen; LOCATED IN: plasma membrane; EXPRESSED IN: 23 plant structures; EXPRESSED DURING: 13 growth stages; CONTAINS InterPro DOMAIN/s: Curculin-like (mannose-binding) lectin (InterPro:IPR001480)
Medtr4g073230	'11.9.3.3'	'lipid metabolism.lipid degradation.lysophospholipases.glycerophosphodiester phosphodiesterase'	ATP binding site (InterPro:IPR017441)
Medtr4g109600	'11.9.3.3'	'lipid metabolism.lipid degradation.lysophospholipases.glycerophosphodiester phosphodiesterase'	glycerophosphodiester phosphodiesterase activity; INVOLVED IN: glycerol metabolic process
Medtr5g094230	'11.9.3.3'	'lipid metabolism.lipid degradation.lysophospholipases.glycerophosphodiester phosphodiesterase'	kinase activity; INVOLVED IN: glycerol metabolic process
Medtr6g082830	'11.9.3.3'	'lipid metabolism.lipid degradation.lysophospholipases.glycerophosphodiester phosphodiesterase'	ATP binding site (InterPro:IPR017441)
Medtr6g082860	'11.9.3.3'	'lipid metabolism.lipid degradation.lysophospholipases.glycerophosphodiester phosphodiesterase'	putative; FUNCTIONS IN: transmembrane receptor protein serine/threonine kinase activity
Medtr6g083270	'11.9.3.3'	'lipid metabolism.lipid degradation.lysophospholipases.glycerophosphodiester phosphodiesterase'	constitutive 4)
Medtr6g083300	'11.9.3.3'	'lipid metabolism.lipid degradation.lysophospholipases.glycerophosphodiester phosphodiesterase'	constitutive 4)
Medtr6g445600	'11.9.3.3'	'lipid metabolism.lipid degradation.lysophospholipases.glycerophosphodiester phosphodiesterase'	ATP binding site (InterPro:IPR017441)
Medtr7g082510	'11.9.3.3'	'lipid metabolism.lipid degradation.lysophospholipases.glycerophosphodiester phosphodiesterase'	ATP binding site (InterPro:IPR017441)
Medtr6g092790	'11.9.3.4'	'lipid metabolism.lipid degradation.lysophospholipases.phospholipase A2'	which specifically hydrolyzes the sn-2 position of phospholipids. The enzyme has a preference towards linoleoyl acyl chain over palmitoyl acyl chain. It also has a slight preference for phosphatidylcholine over phosphatidylethanolamine.; PLA2-ALPHA; FUNCTIONS IN: phospholipase A2 activity; INVOLVED IN: phospholipid metabolic process
Medtr3g099120	'11.9.3.5'	'lipid metabolism.lipid degradation.lysophospholipases.phosphoinositide phospholipase C'	acting on ester bonds; LOCATED IN: endomembrane system; EXPRESSED IN: 22 plant structures; EXPRESSED DURING: 13 growth stages; CONTAINS InterPro DOMAIN/s: Phosphoesterase (InterPro:IPR007312); BEST Arabidopsis thaliana protein match is: non-specific phospholipase C1 (TAIR:AT1G07230.1); Has 2244 Blast hits to 2129 proteins in 399 species: Archae - 32; Bacteria - 1880; Metazoa - 0; Fungi - 127; Pla…
Medtr7g015710	'11.9.3.5'	'lipid metabolism.lipid degradation.lysophospholipases.phosphoinositide phospholipase C'	phosphoric diester hydrolase activity; INVOLVED IN: intracellular signaling pathway
Medtr2g086090	'11.9.4.13'	'lipid metabolism.lipid degradation.beta-oxidation.acyl CoA reductase'	involved in cuticular wax biosynthesis. Lines carrying recessive mutations are deficient in primary alcohol and have glossy stem surfaces.; ECERIFERUM 4 (CER4); FUNCTIONS IN: oxidoreductase activity
Medtr4g053785	'11.9.4.13'	'lipid metabolism.lipid degradation.beta-oxidation.acyl CoA reductase'	involved in cuticular wax biosynthesis. Lines carrying recessive mutations are deficient in primary alcohol and have glossy stem surfaces.; ECERIFERUM 4 (CER4); FUNCTIONS IN: oxidoreductase activity
Medtr5g012920	'11.9.4.2'	'lipid metabolism.lipid degradation.beta-oxidation.acyl CoA DH'	drought stress
Medtr1g014040	'11.9.4.3'	'lipid metabolism.lipid degradation.beta-oxidation.enoyl CoA hydratase'	catalytic activity; INVOLVED IN: fatty acid beta-oxidation
Medtr3g046330	'11.9.4.3'	'lipid metabolism.lipid degradation.beta-oxidation.enoyl CoA hydratase'	catalytic activity; INVOLVED IN: response to karrikin
Medtr7g024300	'11.9.4.3'	'lipid metabolism.lipid degradation.beta-oxidation.enoyl CoA hydratase'	delta2-enoyl CoA isomerase
Medtr3g098170	'11.9.4.5'	'lipid metabolism.lipid degradation.beta-oxidation.acyl-CoA thioesterase'	acting on ester bonds
Medtr3g073180	'12.1.1'	'N-metabolism.nitrate metabolism.NR'	it contributes about 15% of the nitrate reductase activity in shoots. Similar to molybdopterin oxidoreductases at the N-terminus
Medtr5g059820	'12.1.1'	'N-metabolism.nitrate metabolism.NR'	nitrate reductase (NADH) activity; INVOLVED IN: nitric oxide biosynthetic process
Medtr4g086020	'12.1.2'	'N-metabolism.nitrate metabolism.nitrite reductase'	chloroplast precursor (EC 1.7.7.1) - Betula verrucosa (White birch) (Betula pendula) & (at2g15620 : 977.0) Involved in the second step of nitrate assimilation. Its expression is induced by nitrate.; nitrite reductase 1 (NIR1); FUNCTIONS IN: ferredoxin-nitrate reductase activity
Medtr7g089970	'12.2.1.1'	'N-metabolism.ammonia metabolism.glutamate synthase.ferredoxin dependent'	glutamate synthase (ferredoxin) activity; INVOLVED IN: response to light stimulus
Medtr2g021242	'12.2.2'	'N-metabolism.ammonia metabolism.glutamine synthetase'	chloroplast precursor (EC 6.3.1.2) (Glutamate--ammonia ligase) (Chloroplast GS2) - Medicago sativa (Alfalfa) & (at5g35630 : 640.0) chloroplastic glutamine synthetase; glutamine synthetase 2 (GS2); FUNCTIONS IN: glutamate-ammonia ligase activity; INVOLVED IN: in 8 processes; LOCATED IN: in 6 components; EXPRESSED IN: 23 plant structures; EXPRESSED DURING: 14 growth stages; CONTAINS InterPro DOMAIN…
Medtr2g021255	'12.2.2'	'N-metabolism.ammonia metabolism.glutamine synthetase'	chloroplast precursor (EC 6.3.1.2) (Glutamate--ammonia ligase) (Chloroplast GS2) - Medicago sativa (Alfalfa) & (at5g35630 : 691.0) chloroplastic glutamine synthetase; glutamine synthetase 2 (GS2); FUNCTIONS IN: glutamate-ammonia ligase activity; INVOLVED IN: in 8 processes; LOCATED IN: in 6 components; EXPRESSED IN: 23 plant structures; EXPRESSED DURING: 14 growth stages; CONTAINS InterPro DOMAIN…
Medtr3g065250	'12.2.2'	'N-metabolism.ammonia metabolism.glutamine synthetase'	the enzyme has high affinity with substrate ammonium; glutamine synthase clone R1 (GSR 1); FUNCTIONS IN: glutamate-ammonia ligase activity
Medtr4g094905	'12.4'	'N-metabolism.misc'	FAD binding
Medtr8g067420	'12.4'	'N-metabolism.misc'	FAD binding
Medtr3g064740	'13.1.1.1.1'	'amino acid metabolism.synthesis.central amino acid metabolism.GABA.Glutamate decarboxylase'	glutamate decarboxylase activity; INVOLVED IN: response to cadmium ion; EXPRESSED IN: 13 plant structures; EXPRESSED DURING: 6 growth stages; CONTAINS InterPro DOMAIN/s: Pyridoxal phosphate-dependent transferase
Medtr6g075210	'13.1.1.1.1'	'amino acid metabolism.synthesis.central amino acid metabolism.GABA.Glutamate decarboxylase'	glutamate metabolic process
Medtr4g016770	'13.1.1.1.2'	'amino acid metabolism.synthesis.central amino acid metabolism.GABA.GABA transaminase'	major domain (InterPro:IPR015424)
Medtr3g112050	'13.1.2.3.21'	'amino acid metabolism.synthesis.glutamate family.arginine.ornithine carbamoyltransferase'	chloroplast precursor (EC 2.1.3.3) (OTCase) (Ornithine transcarbamylase) - Pisum sativum (Garden pea) & (at1g75330 : 508.0) ornithine carbamoyltransferase (OTC); FUNCTIONS IN: amino acid binding
Medtr1g012540	'13.1.2.3.3'	'amino acid metabolism.synthesis.glutamate family.arginine.N-Acetylglutamate-5-P reductase'	acting on the aldehyde or oxo group of donors
Medtr2g103300	'13.1.2.3.31'	'amino acid metabolism.synthesis.glutamate family.arginine.aspartate racemase'	acting on amino acids and derivatives; INVOLVED IN: metabolic process
Medtr4g114000	'13.1.2.3.31'	'amino acid metabolism.synthesis.glutamate family.arginine.aspartate racemase'	acting on amino acids and derivatives; INVOLVED IN: metabolic process
Medtr3g087220	'13.1.3.1.1'	'amino acid metabolism.synthesis.aspartate family.asparagine.asparagine synthetase'	Asparagine synthase (InterPro:IPR001962)
Medtr2g099510	'13.1.3.2.1'	'amino acid metabolism.synthesis.aspartate family.threonine.threonine synthase'	chloroplast precursor (EC 4.2.3.1) (TS) - Solanum tuberosum (Potato) & (at4g29840 : 866.0) threonine synthase; METHIONINE OVER-ACCUMULATOR 2 (MTO2); FUNCTIONS IN: threonine synthase activity; INVOLVED IN: threonine biosynthetic process
Medtr2g046710	'13.1.3.4'	'amino acid metabolism.synthesis.aspartate family.methionine'	response to cold
Medtr4g123810	'13.1.3.4'	'amino acid metabolism.synthesis.aspartate family.methionine'	response to cold
Medtr7g086300	'13.1.3.4'	'amino acid metabolism.synthesis.aspartate family.methionine'	involved in methionine regeneration via the activated methyl cycle (SAM cycle). The protein undergoes thiolation following treatment with the oxidant tert-butylhydroperoxide.; COBALAMIN-INDEPENDENT METHIONINE SYNTHASE (ATCIMS); FUNCTIONS IN: 5-methyltetrahydropteroyltriglutamate-homocysteine S-methyltransferase activity
Medtr7g102120	'13.1.3.4'	'amino acid metabolism.synthesis.aspartate family.methionine'	S-adenosylmethionine biosynthetic process; LOCATED IN: plasma membrane; EXPRESSED IN: 25 plant structures; EXPRESSED DURING: 16 growth stages; CONTAINS InterPro DOMAIN/s: S-adenosylmethionine synthetase (InterPro:IPR002133)
Medtr7g110310	'13.1.3.4'	'amino acid metabolism.synthesis.aspartate family.methionine'	response to salt stress
Medtr7g011230	'13.1.3.4.1'	'amino acid metabolism.synthesis.aspartate family.methionine.cystathionine gamma-synthase'	which performs the first committed step in methionine biosynthesis. A conserved motif of 13 amino acids in the first exon is required for posttranscriptional autoregulation. This enzyme shares the same substrate as threonine synthase (TS) and its absence transcriptionally affects 8 genes in the genome.; METHIONINE OVERACCUMULATION 1 (MTO1); FUNCTIONS IN: cystathionine gamma-synthase activity; INV…
Medtr2g450530	'13.1.3.4.12'	'amino acid metabolism.synthesis.aspartate family.methionine.homocysteine S-methyltransferase'	plastoglobule; EXPRESSED IN: 21 plant structures; EXPRESSED DURING: 12 growth stages; CONTAINS InterPro DOMAIN/s: Methyltransferase type 11 (InterPro:IPR013216); BEST Arabidopsis thaliana protein match is: S-adenosyl-L-methionine-dependent methyltransferases superfamily protein (TAIR:AT1G78140.1); Has 8121 Blast hits to 8118 proteins in 1828 species: Archae - 365; Bacteria - 6420; Metazoa - 92; F…
Medtr3g074250	'13.1.3.4.12'	'amino acid metabolism.synthesis.aspartate family.methionine.homocysteine S-methyltransferase'	plastoglobule; EXPRESSED IN: 24 plant structures; EXPRESSED DURING: 15 growth stages; CONTAINS InterPro DOMAIN/s: Methyltransferase type 11 (InterPro:IPR013216); BEST Arabidopsis thaliana protein match is: S-adenosyl-L-methionine-dependent methyltransferases superfamily protein (TAIR:AT2G41040.1); Has 6083 Blast hits to 6080 proteins in 1590 species: Archae - 290; Bacteria - 4806; Metazoa - 59; F…
Medtr7g075090	'13.1.3.5.1'	'amino acid metabolism.synthesis.aspartate family.lysine.dihydrodipicolinate synthase'	chloroplast precursor (EC 4.2.1.52) (DHDPS) - Glycine max (Soybean) & (at2g45440 : 484.0) Encodes a protein that likely has dihydropicolinate synthase activity based on its mutant phenotype of decreased lysine levels and increased aspartate levels. The mutant also has increased levels of threonine. The enzyme is predicted to localize to the chloroplast.; dihydrodipicolinate synthase (DHDPS2); FUN…
Medtr1g101400	'13.1.3.5.2'	'amino acid metabolism.synthesis.aspartate family.lysine.dihydrodipicolinate reductase'	which is involved in electron transfer between PSII and PSI. Likely functions in biogenesis or stabilization of the NAD(P)H dehydrogenase complex.; chlororespiration reduction 1 (crr1); FUNCTIONS IN: dihydrodipicolinate reductase activity; INVOLVED IN: photosynthesis
Medtr8g028145	'13.1.3.5.2'	'amino acid metabolism.synthesis.aspartate family.lysine.dihydrodipicolinate reductase'	bacterial/plant; FUNCTIONS IN: dihydrodipicolinate reductase activity; INVOLVED IN: oxidation reduction
Medtr5g022700	'13.1.3.5.5'	'amino acid metabolism.synthesis.aspartate family.lysine.diaminopimelate decarboxylase'	cultured cell; CONTAINS InterPro DOMAIN/s: Alanine racemase/group IV decarboxylase
Medtr7g083920	'13.1.3.6.1.1'	'amino acid metabolism.synthesis.aspartate family.misc.homoserine.aspartate kinase'	which allow binding to a extreme variety of ligands. Can function as a monomer or as a dimer with acetohydroxyacid synthase (HSDH).; aspartate kinase 1 (AK-LYS1); FUNCTIONS IN: aspartate kinase activity; INVOLVED IN: cellular amino acid biosynthetic process; LOCATED IN: chloroplast; EXPRESSED IN: 24 plant structures; EXPRESSED DURING: 15 growth stages; CONTAINS InterPro DOMAIN/s: Aspartate kinase
Medtr8g083210	'13.1.3.6.1.1'	'amino acid metabolism.synthesis.aspartate family.misc.homoserine.aspartate kinase'	isoleucine and methionine.; aspartate kinase-homoserine dehydrogenase ii (AK-HSDH II); FUNCTIONS IN: homoserine dehydrogenase activity
Medtr8g105860	'13.1.3.6.1.2'	'amino acid metabolism.synthesis.aspartate family.misc.homoserine.aspartate semialdehyde dehydrogenase'	which produces the branch point intermediate for lysine and threonine/methionine biosynthesis; semialdehyde dehydrogenase family protein; FUNCTIONS IN: oxidoreductase activity
Medtr3g079330	'13.1.3.6.1.3'	'amino acid metabolism.synthesis.aspartate family.misc.homoserine.homoserine dehydrogenase'	aspartate family amino acid biosynthetic process
Medtr5g099180	'13.1.3.6.1.4'	'amino acid metabolism.synthesis.aspartate family.misc.homoserine.homoserine kinase'	a compound at the branching point of methionine and threonine biosynthesis. HSK is found in the stromal fraction of chloroplasts. Mutants are susceptible to downy mildew fungus Hyaloperonospora parasitica.; homoserine kinase (HSK); FUNCTIONS IN: homoserine kinase activity; INVOLVED IN: methionine biosynthetic process
Medtr3g099190	'13.1.4.1.1'	'amino acid metabolism.synthesis.branched chain group.common.acetolactate synthase'	chloroplast precursor (EC 2.2.1.6) (Acetolactate synthase II) (Acetohydroxy-acid synthase II) (ALS II) - Nicotiana tabacum (Common tobacco) & (at3g48560 : 1022.0) Catalyzes the formation of acetolactate from pyruvate
Medtr8g088600	'13.1.4.1.1'	'amino acid metabolism.synthesis.branched chain group.common.acetolactate synthase'	amino acid binding; INVOLVED IN: branched chain family amino acid biosynthetic process; LOCATED IN: chloroplast; EXPRESSED IN: 24 plant structures; EXPRESSED DURING: 13 growth stages; CONTAINS InterPro DOMAIN/s: Acetolactate synthase
Medtr2g091205	'13.1.4.1.2'	'amino acid metabolism.synthesis.branched chain group.common.ketol-acid reductoisomerase'	chloroplast precursor (EC 1.1.1.86) (Acetohydroxy-acid reductoisomerase) (Alpha-keto-beta-hydroxylacil reductoisomerase) - Pisum sativum (Garden pea) & (at3g58610 : 831.0) ketol-acid reductoisomerase; CONTAINS InterPro DOMAIN/s: Acetohydroxy acid isomeroreductase
Medtr4g079780	'13.1.4.1.2'	'amino acid metabolism.synthesis.branched chain group.common.ketol-acid reductoisomerase'	chloroplast precursor (EC 1.1.1.86) (Acetohydroxy-acid reductoisomerase) (Alpha-keto-beta-hydroxylacil reductoisomerase) - Pisum sativum (Garden pea) & (at3g58610 : 946.0) ketol-acid reductoisomerase; CONTAINS InterPro DOMAIN/s: Acetohydroxy acid isomeroreductase
Medtr1g061800	'13.1.4.5.1'	'amino acid metabolism.synthesis.branched chain group.isoleucine specific.threonine ammonia-lyase'	threonine metabolic process; LOCATED IN: chloroplast; EXPRESSED IN: 22 plant structures; EXPRESSED DURING: 13 growth stages; CONTAINS InterPro DOMAIN/s: Threonine dehydratase I (InterPro:IPR005787)
Medtr1g107480	'13.1.5.1.1'	'amino acid metabolism.synthesis.serine-glycine-cysteine group.serine.phosphoglycerate dehydrogenase'	chloroplast
Medtr4g005880	'13.1.5.1.1'	'amino acid metabolism.synthesis.serine-glycine-cysteine group.serine.phosphoglycerate dehydrogenase'	D-isomer specific 2-hydroxyacid dehydrogenase
Medtr8g074010	'13.1.5.1.2'	'amino acid metabolism.synthesis.serine-glycine-cysteine group.serine.phosphoserine aminotransferase'	chloroplast; EXPRESSED IN: 23 plant structures; EXPRESSED DURING: 14 growth stages; CONTAINS InterPro DOMAIN/s: Aminotransferase class-V pyridoxal-phosphate binding site (InterPro:IPR020578)
Medtr1g103690	'13.1.5.3.1'	'amino acid metabolism.synthesis.serine-glycine-cysteine group.cysteine.OASTL'	a key enzyme in cysteine biosynthesis and for the fixation of inorganic sulfide. It catalyzes the formation of cysteine from O-acetylserine and inorganic sulfide. Gene expression is predominant in the root cortex and the xylem parenchyma. Gene expression is induced in leave
Medtr7g078070	'13.1.5.3.1'	'amino acid metabolism.synthesis.serine-glycine-cysteine group.cysteine.OASTL'	an intermediate of cyanide detoxification pathway.; cysteine synthase C1 (CYSC1); CONTAINS InterPro DOMAIN/s: Pyridoxal phosphate-dependent enzyme
Medtr5g095470	'13.1.5.3.2'	'amino acid metabolism.synthesis.serine-glycine-cysteine group.cysteine.SAT'	serine O-acetyltransferase activity; INVOLVED IN: response to cadmium ion
Medtr5g064500	'13.1.6.1.1'	'amino acid metabolism.synthesis.aromatic aa.chorismate.3-deoxy-D-arabino-heptulosonate 7-phosphate synthase'	chloroplast precursor (EC 2.5.1.54) (Phospho-2-keto-3-deoxyheptonate aldolase 1) (DAHP synthetase 1) (3-deoxy-D-arabino-heptulosonate 7-phosphate synthase 1) - Nicotiana tabacum (Common tob & (at1g22410 : 855.0) Class-II DAHP synthetase family protein; FUNCTIONS IN: 3-deoxy-7-phosphoheptulonate synthase activity; INVOLVED IN: aromatic amino acid family biosynthetic process; LOCATED IN: membrane; …
Medtr1g013820	'13.1.6.2.1'	'amino acid metabolism.synthesis.aromatic aa.phenylalanine and tyrosine.chorismate mutase'	type II (InterPro:IPR020822)
Medtr3g106000	'13.1.6.2.1'	'amino acid metabolism.synthesis.aromatic aa.phenylalanine and tyrosine.chorismate mutase'	type II (InterPro:IPR020822)
Medtr2g084875	'13.1.6.3.1'	'amino acid metabolism.synthesis.aromatic aa.phenylalanine.arogenate dehydratase / prephenate dehydratase'	it is 98 times more active with arogenate than prephenate in enzymatic assays.; arogenate dehydratase 6 (ADT6); FUNCTIONS IN: arogenate dehydratase activity
Medtr2g088130	'13.1.6.3.1'	'amino acid metabolism.synthesis.aromatic aa.phenylalanine.arogenate dehydratase / prephenate dehydratase'	prephenate dehydratase activity; INVOLVED IN: L-phenylalanine biosynthetic process; LOCATED IN: chloroplast; EXPRESSED IN: 21 plant structures; EXPRESSED DURING: 13 growth stages; CONTAINS InterPro DOMAIN/s: Prephenate dehydratase (InterPro:IPR001086)
Medtr1g114520	'13.1.6.5.1'	'amino acid metabolism.synthesis.aromatic aa.tryptophan.anthranilate synthase'	aromatic amino acid family biosynthetic process; LOCATED IN: chloroplast
Medtr5g005670	'13.1.6.5.5'	'amino acid metabolism.synthesis.aromatic aa.tryptophan.tryptophan synthase'	tryptophan synthase activity
Medtr6g016665	'13.1.6.5.5'	'amino acid metabolism.synthesis.aromatic aa.tryptophan.tryptophan synthase'	tryptophan synthase activity
Medtr7g096080	'13.1.6.5.5'	'amino acid metabolism.synthesis.aromatic aa.tryptophan.tryptophan synthase'	the penultimate reaction in the biosynthesis of tryptophan. Functions as a heterocomplex with tryptophan synthase beta subunit (TSA2).; tryptophan synthase alpha chain (TSA1); FUNCTIONS IN: tryptophan synthase activity; INVOLVED IN: tryptophan biosynthetic process
Medtr7g102980	'13.1.6.5.5'	'amino acid metabolism.synthesis.aromatic aa.tryptophan.tryptophan synthase'	the penultimate reaction in the biosynthesis of tryptophan. Functions as a heterocomplex with tryptophan synthase beta subunit (TSA2).; tryptophan synthase alpha chain (TSA1); FUNCTIONS IN: tryptophan synthase activity; INVOLVED IN: tryptophan biosynthetic process
Medtr7g084480	'13.1.7.2'	'amino acid metabolism.synthesis.histidine.bifunctional phosphoribosyl-ATP diphosphatase and phosphoribosyl-AMP cyclohydrolase'	phosphoribosyl-ATP diphosphatase activity; INVOLVED IN: histidine biosynthetic process; LOCATED IN: chloroplast; EXPRESSED IN: 22 plant structures; EXPRESSED DURING: 13 growth stages; CONTAINS InterPro DOMAIN/s: Phosphoribosyl-AMP cyclohydrolase (InterPro:IPR002496)
Medtr2g015010	'13.1.7.3'	'amino acid metabolism.synthesis.histidine.phosphoribosyl-AMP cyclohydrolase'	Ribulose-phosphate binding barrel (InterPro:IPR011060)
Medtr6g033540	'13.1.7.7'	'amino acid metabolism.synthesis.histidine.histidinol-phosphate aminotransferase'	major domain (InterPro:IPR015424)
Medtr6g007070	'13.2.1.2'	'amino acid metabolism.degradation.central amino acid metabolism.aspartate'	oxidoreductase activity
Medtr3g085640	'13.2.2.3'	'amino acid metabolism.degradation.glutamate family.arginine'	alpha subunit (InterPro:IPR005848)
Medtr4g096770	'13.2.2.3'	'amino acid metabolism.degradation.glutamate family.arginine'	nucleotide binding
Medtr7g090160	'13.2.2.3'	'amino acid metabolism.degradation.glutamate family.arginine'	catalyzes the final step in proline biosynthesis from glutamate and ornithine.In situ hybridization indicated that under normal growth conditions
Medtr1g018760	'13.2.3.1.1'	'amino acid metabolism.degradation.aspartate family.asparagine.L-asparaginase'	asparaginase 2 (InterPro:IPR000246); BEST Arabidopsis thaliana protein match is: N-terminal nucleophile aminohydrolases (Ntn hydrolases) superfamily protein (TAIR:AT5G08100.1); Has 3285 Blast hits to 3219 proteins in 891 species: Archae - 113; Bacteria - 1512; Metazoa - 512; Fungi - 247; Plants - 200; Viruses - 0; Other Eukaryotes - 701 (source: NCBI BLink). & (q9zsd6|aspg_luplu : 352.0) L-aspara…
Medtr4g109920	'13.2.3.1.1'	'amino acid metabolism.degradation.aspartate family.asparagine.L-asparaginase'	asparaginase 2 (InterPro:IPR000246); BEST Arabidopsis thaliana protein match is: N-terminal nucleophile aminohydrolases (Ntn hydrolases) superfamily protein (TAIR:AT3G16150.1); Has 35333 Blast hits to 34131 proteins in 2444 species: Archae - 798; Bacteria - 22429; Metazoa - 974; Fungi - 991; Plants - 531; Viruses - 0; Other Eukaryotes - 9610 (source: NCBI BLink). & (gnl|cdd|85245 : 390.0) no desc…
Medtr3g084340	'13.2.3.4'	'amino acid metabolism.degradation.aspartate family.methionine'	one-carbon metabolic process
Medtr8g083090	'13.2.3.4'	'amino acid metabolism.degradation.aspartate family.methionine'	one-carbon metabolic process
Medtr4g022430	'13.2.4.1'	'amino acid metabolism.degradation.branched chain group.shared'	glyoxysome) 3-ketoacyl-CoA thiolase
Medtr2g009750	'13.2.4.3'	'amino acid metabolism.degradation.branched chain group.valine'	Aldehyde dehydrogenase (InterPro:IPR015590)
Medtr0449s0040	'13.2.4.5'	'amino acid metabolism.degradation.branched chain group.isoleucine'	transferring acyl groups other than amino-acyl groups
Medtr5g098310	'13.2.4.5'	'amino acid metabolism.degradation.branched chain group.isoleucine'	transferring acyl groups other than amino-acyl groups
Medtr4g132360	'13.2.5.2'	'amino acid metabolism.degradation.serine-glycine-cysteine group.glycine'	mitochondrial precursor (EC 2.1.2.10) (Glycine cleavage system T protein) (GCVT) - Pisum sativum (Garden pea) & (at1g11860 : 747.0) Glycine cleavage T-protein family; FUNCTIONS IN: aminomethyltransferase activity; EXPRESSED IN: 23 plant structures; EXPRESSED DURING: 14 growth stages; CONTAINS InterPro DOMAIN/s: Glycine cleavage system T protein (InterPro:IPR006223)
Medtr2g067080	'13.2.5.3'	'amino acid metabolism.degradation.serine-glycine-cysteine group.cysteine'	which belongs to a group of enzymes widely distributed in all three phyla that catalyze the transfer of sulfur from a donor to a thiophilic acceptor substrate. The protein and transcript levels are NOT affected by senescence or exogenous cyanide
Medtr2g090615	'13.2.6.2'	'amino acid metabolism.degradation.aromatic aa.tyrosine'	Aminotransferase
Medtr1g099050	'13.2.7'	'amino acid metabolism.degradation.histidine'	carboxy-lyase activity
Medtr3g088885	'13.99'	'amino acid metabolism.misc'	metabolic process; LOCATED IN: cytosol; EXPRESSED IN: 22 plant structures; EXPRESSED DURING: 13 growth stages; CONTAINS InterPro DOMAIN/s: Protein-PII uridylyltransferase (InterPro:IPR010043)
Medtr7g028050	'13.99'	'amino acid metabolism.misc'	carpel
Medtr6g016325	'14.1'	'S-assimilation.ATPS'	Pseudouridine synthase/archaeosine transglycosylase-like (InterPro:IPR015947)
Medtr6g016335	'14.1'	'S-assimilation.ATPS'	Pseudouridine synthase/archaeosine transglycosylase-like (InterPro:IPR015947)
Medtr7g085650	'14.15'	'S-assimilation.AKN'	including the glucosinolates. Redundant with APK4.; adenosine-5'-phosphosulfate (APS) kinase 3 (APK3); FUNCTIONS IN: transferase activity
Medtr2g022520	'15'	'metal handling'	response to aluminum ion; LOCATED IN: plasma membrane; EXPRESSED IN: 23 plant structures; EXPRESSED DURING: 13 growth stages; BEST Arabidopsis thaliana protein match is: Aluminium induced protein with YGL and LRDR motifs (TAIR:AT5G43830.1); Has 840 Blast hits to 840 proteins in 265 species: Archae - 8; Bacteria - 375; Metazoa - 14; Fungi - 0; Plants - 326; Viruses - 3; Other Eukaryotes - 114 (sou…
Medtr7g108560	'15'	'metal handling'	T
Medtr1g100130	'15.1'	'metal handling.acquisition'	shoots and cotyledons
Medtr2g028530	'15.1'	'metal handling.acquisition'	flower and cotyledon) in a light- and cell differentiation-specific manner.; ferric reduction oxidase 6 (FRO6); CONTAINS InterPro DOMAIN/s: Ferredoxin reductase-type FAD-binding domain (InterPro:IPR017927)
Medtr4g105080	'15.1'	'metal handling.acquisition'	ferric-chelate reductase activity; INVOLVED IN: oxidation reduction; LOCATED IN: mitochondrion
Medtr1g067560	'15.2'	'metal handling.binding	'(at2g37390 : 131.0) Chloroplast-targeted copper chaperone protein; FUNCTIONS IN: metal ion binding; INVOLVED IN: metal ion transport; LOCATED IN: cellular_component unknown; EXPRESSED IN: 12 plant structures; EXPRESSED DURING: 7 growth stages; CONTAINS InterPro DOMAIN/s: Heavy metal transport/detoxification protein (InterPro:IPR006121); BEST Arabidopsis thaliana protein match is: Chloroplast-tar…
Medtr3g099030	'15.2'	'metal handling.binding	'(at5g50740 : 171.0) Heavy metal transport/detoxification superfamily protein ; FUNCTIONS IN: metal ion binding; INVOLVED IN: metal ion transport; LOCATED IN: cellular_component unknown; EXPRESSED IN: 20 plant structures; EXPRESSED DURING: 13 growth stages; CONTAINS InterPro DOMAIN/s: Heavy metal transport/detoxification protein (InterPro:IPR006121); BEST Arabidopsis thaliana protein match is: fa…
Medtr3g117890	'15.2'	'metal handling.binding	'(at4g38580 : 229.0) putative farnesylated protein (At4g38580) mRNA
Medtr4g073040	'15.2'	'metal handling.binding	'(at4g38580 : 218.0) putative farnesylated protein (At4g38580) mRNA
Medtr5g025150	'15.2'	'metal handling.binding	'(at1g22990 : 165.0) Heavy metal transport/detoxification superfamily protein ; FUNCTIONS IN: metal ion binding; INVOLVED IN: metal ion transport; LOCATED IN: cellular_component unknown; EXPRESSED IN: 9 plant structures; EXPRESSED DURING: LP.04 four leaves visible
Medtr5g083170	'15.2'	'metal handling.binding	'(q41709|fri2_vigun : 336.0) Ferritin-2
Medtr7g097190	'15.2'	'metal handling.binding	'(at5g44070 : 640.0) Phytochelatin synthase gene confers tolerance to cadmium ions. Catalyzes phytochelatin (PC) synthesis from glutathione (GSH) in the presence of Cd2+
Medtr7g097200	'15.2'	'metal handling.binding	'(at5g44070 : 524.0) Phytochelatin synthase gene confers tolerance to cadmium ions. Catalyzes phytochelatin (PC) synthesis from glutathione (GSH) in the presence of Cd2+
Medtr8g091420	'15.2'	'metal handling.binding	'(at4g39700 : 179.0) Heavy metal transport/detoxification superfamily protein ; FUNCTIONS IN: metal ion binding; INVOLVED IN: metal ion transport; LOCATED IN: cellular_component unknown; CONTAINS InterPro DOMAIN/s: Heavy metal transport/detoxification protein (InterPro:IPR006121); BEST Arabidopsis thaliana protein match is: Heavy metal transport/detoxification superfamily protein (TAIR:AT1G22990.…
Medtr7g100160	'15.3'	'metal handling.regulation'	without an ATPase domain
Medtr8g105790	'15.3'	'metal handling.regulation'	transmembrane (InterPro:IPR008217); Has 1947 Blast hits to 1945 proteins in 688 species: Archae - 106; Bacteria - 1196; Metazoa - 0; Fungi - 163; Plants - 191; Viruses - 0; Other Eukaryotes - 291 (source: NCBI BLink). & (gnl|cdd|29966 : 284.0) no description available & (gnl|cdd|39674 : 254.0) no description available & (ipr008217 : 167.75224) Domain of unknown function DUF125
Medtr4g005190	'16.1'	'secondary metabolism.isoprenoids'	conserved site (InterPro:IPR002365)
Medtr8g016975	'16.1'	'secondary metabolism.isoprenoids'	conserved site (InterPro:IPR002365)
Medtr6g013820	'16.1.1'	'secondary metabolism.isoprenoids.non-mevalonate pathway'	HCG-1 (InterPro:IPR017000); BEST Arabidopsis thaliana protein match is: membrane-anchored ubiquitin-fold protein 1 precursor (TAIR:AT3G01050.1); Has 168 Blast hits to 168 proteins in 26 species: Archae - 0; Bacteria - 0; Metazoa - 0; Fungi - 11; Plants - 157; Viruses - 0; Other Eukaryotes - 0 (source: NCBI BLink). & (q75gt2|mub1_orysa : 131.0) Membrane-anchored ubiquitin-fold protein 1 precursor …
Medtr4g118640	'16.1.1.1'	'secondary metabolism.isoprenoids.non-mevalonate pathway.DXS'	chloroplast precursor (EC 2.2.1.7) (1-deoxyxylulose-5-phosphate synthase) (DXP synthase) (DXPS) (CapTKT2) - Capsicum annuum (Bell pepper) & (at4g15560 : 1088.0) Encodes a protein with 1-deoxyxylulose 5-phosphate synthase activity involved in the MEP pathway. It is essential for chloroplast development in Arabidopsis; CLOROPLASTOS ALTERADOS 1 (CLA1); FUNCTIONS IN: 1-deoxy-D-xylulose-5-phosphate sy…
Medtr6g089570	'16.1.2.2'	'secondary metabolism.isoprenoids.mevalonate pathway.HMG-CoA synthase'	Hydroxymethylglutaryl-coenzyme A synthase C-terminal (InterPro:IPR013746)
Medtr2g027300	'16.1.2.9'	'secondary metabolism.isoprenoids.mevalonate pathway.farnesyl pyrophosphate synthetase'	geranyltranstransferase activity; INVOLVED IN: farnesyl diphosphate biosynthetic process
Medtr1g054305	'16.1.3'	'secondary metabolism.isoprenoids.tocopherol biosynthesis'	farnesyl diphosphate and geranylgeranyldiphosphate as prenyl donors
Medtr1g090913	'16.1.3'	'secondary metabolism.isoprenoids.tocopherol biosynthesis'	chloroplast precursor (EC 2.7.-.-) - Glycine max (Soybean) & (at5g04490 : 322.0) Encodes a protein with phytol kinase activity involved in tocopherol biosynthesis.; vitamin E pathway gene 5 (VTE5); FUNCTIONS IN: phytol kinase activity
Medtr1g071110	'16.1.3.3'	'secondary metabolism.isoprenoids.tocopherol biosynthesis.MPBQ/MSBQ methyltransferase'	suggesting that the APG1 protein is involved in the methylation step of PQ biosynthesis. The gene product is also involved in tocopherol (vitamin E) biosynthesis.; ALBINO OR PALE GREEN MUTANT 1 (APG1); FUNCTIONS IN: S-adenosylmethionine-dependent methyltransferase activity
Medtr1g076570	'16.1.3.3'	'secondary metabolism.isoprenoids.tocopherol biosynthesis.MPBQ/MSBQ methyltransferase'	chloroplast precursor (E37) - Spinacia oleracea (Spinach) & (at3g63410 : 471.0) Encodes a MPBQ/MSBQ methyltransferase located in the chloroplast inner envelope membrane. Mutant plants lack plastoquinone (PQ)
Medtr1g034450	'16.1.4'	'secondary metabolism.isoprenoids.carotenoids'	T
Medtr4g094295	'16.1.4'	'secondary metabolism.isoprenoids.carotenoids'	chloroplast envelope; EXPRESSED IN: 21 plant structures; EXPRESSED DURING: 13 growth stages; CONTAINS InterPro DOMAIN/s: Amine oxidase (InterPro:IPR002937); BEST Arabidopsis thaliana protein match is: Flavin containing amine oxidoreductase family (TAIR:AT5G14220.1); Has 2908 Blast hits to 2906 proteins in 704 species: Archae - 36; Bacteria - 1433; Metazoa - 261; Fungi - 51; Plants - 352; Viruses …
Medtr4g134780	'16.1.4'	'secondary metabolism.isoprenoids.carotenoids'	chloroplast precursor (EC 5.-.-.-) (CrtISO) - Daucus carota (Carrot) & (reliability: 1728.0) & (original description: no original description)'
Medtr8g077580	'16.1.4'	'secondary metabolism.isoprenoids.carotenoids'	chloroplast precursor (EC 5.-.-.-) (CrtISO) - Daucus carota (Carrot) & (reliability: 1844.0) & (original description: no original description)'
Medtr3g450510	'16.1.4.1'	'secondary metabolism.isoprenoids.carotenoids.phytoene synthase'	chloroplast precursor (EC 2.5.1.-) - Daucus carota (Carrot) & (at5g17230 : 545.0) Encodes phytoene synthase.; PHYTOENE SYNTHASE (PSY); CONTAINS InterPro DOMAIN/s: Squalene/phytoene synthase
Medtr5g076620	'16.1.4.1'	'secondary metabolism.isoprenoids.carotenoids.phytoene synthase'	chloroplast precursor (EC 2.5.1.-) - Capsicum annuum (Bell pepper) & (at5g17230 : 500.0) Encodes phytoene synthase.; PHYTOENE SYNTHASE (PSY); CONTAINS InterPro DOMAIN/s: Squalene/phytoene synthase
Medtr7g116630	'16.1.4.21'	'secondary metabolism.isoprenoids.carotenoids.violaxanthin de-epoxidase'	response to heat
Medtr8g092050	'16.1.4.21'	'secondary metabolism.isoprenoids.carotenoids.violaxanthin de-epoxidase'	T
Medtr2g086700	'16.1.4.5'	'secondary metabolism.isoprenoids.carotenoids.lycopene beta cyclase'	chloroplast precursor (EC 5.3.99.8) - Citrus sinensis (Sweet orange) & (at3g10230 : 548.0) Encodes a protein with lycopene &#946;-cyclase activity. This enzyme uses the linear
Medtr1g062190	'16.1.4.7'	'secondary metabolism.isoprenoids.carotenoids.carotenoid epsilon ring hydroxylase'	member of the xanthophyll class of carotenoids. Involved in epsilon ring hydroxylation. Maps at 67.3 cM on chromosome 3.; LUTEIN DEFICIENT 1 (LUT1); FUNCTIONS IN: epsilon hydroxylase activity
Medtr1g054965	'16.1.4.8'	'secondary metabolism.isoprenoids.carotenoids.carotenoid isomerase'	CRTiso is required to complete the synthesis of lycopene from phytoene.; carotenoid isomerase (CRTISO); CONTAINS InterPro DOMAIN/s: Fumarate reductase/succinate dehydrogenase flavoprotein
Medtr4g045810	'16.1.5'	'secondary metabolism.isoprenoids.terpenoids'	8-cineole synthase
Medtr4g092020	'16.1.5'	'secondary metabolism.isoprenoids.terpenoids'	metal-binding domain (InterPro:IPR005630)
Medtr6g039440	'16.1.5'	'secondary metabolism.isoprenoids.terpenoids'	metal-binding domain (InterPro:IPR005630)
Medtr7g010710	'16.1.5'	'secondary metabolism.isoprenoids.terpenoids'	E)-alpha-farnesene synthase in the Col ecotype of Arabidopsis. This enzyme can also catalyze the formation of (E)-beta-ocimene as well as trace amounts of myrcene and other related compounds in vitro. The cytosolic localization of the protein may make it favor (E
Medtr2g008330	'16.10'	'secondary metabolism.simple phenols'	a member of laccase family of genes (17 members in Arabidopsis).; laccase 14 (LAC14); FUNCTIONS IN: laccase activity; INVOLVED IN: oxidation reduction
Medtr3g462760	'16.10'	'secondary metabolism.simple phenols'	a member of laccase family (17 members in Arabidopsis). Might be involved in cell wall biosynthesis. Mutants have a mild irregular xylem phenotype.; IRREGULAR XYLEM 12 (IRX12); FUNCTIONS IN: laccase activity; INVOLVED IN: secondary cell wall biogenesis; LOCATED IN: endomembrane system
Medtr4g015120	'16.10'	'secondary metabolism.simple phenols'	a member of laccase family (17 members in Arabidopsis). Might be involved in cell wall biosynthesis. Mutants have a mild irregular xylem phenotype.; IRREGULAR XYLEM 12 (IRX12); FUNCTIONS IN: laccase activity; INVOLVED IN: secondary cell wall biogenesis; LOCATED IN: endomembrane system
Medtr4g064530	'16.10'	'secondary metabolism.simple phenols'	knockout mutant had reduced root elongation under PEG-induced dehydration; laccase 2 (LAC2); FUNCTIONS IN: laccase activity; INVOLVED IN: response to water deprivation; LOCATED IN: endomembrane system
Medtr5g081790	'16.10'	'secondary metabolism.simple phenols'	a member of laccase family (17 members in Arabidopsis). Might be involved in cell wall biosynthesis. Mutants have a mild irregular xylem phenotype.; IRREGULAR XYLEM 12 (IRX12); FUNCTIONS IN: laccase activity; INVOLVED IN: secondary cell wall biogenesis; LOCATED IN: endomembrane system
Medtr5g081810	'16.10'	'secondary metabolism.simple phenols'	a member of laccase family (17 members in Arabidopsis). Might be involved in cell wall biosynthesis. Mutants have a mild irregular xylem phenotype.; IRREGULAR XYLEM 12 (IRX12); FUNCTIONS IN: laccase activity; INVOLVED IN: secondary cell wall biogenesis; LOCATED IN: endomembrane system
Medtr7g062250	'16.10'	'secondary metabolism.simple phenols'	a member of laccase family of genes (17 members in Arabidopsis).; laccase 17 (LAC17); FUNCTIONS IN: laccase activity; INVOLVED IN: oxidation reduction
Medtr7g062310	'16.10'	'secondary metabolism.simple phenols'	a member of laccase family of genes (17 members in Arabidopsis).; laccase 17 (LAC17); FUNCTIONS IN: laccase activity; INVOLVED IN: oxidation reduction
Medtr8g027375	'16.10'	'secondary metabolism.simple phenols'	a member of laccase family of genes (with 17 members in Arabidopsis).; laccase 6 (LAC6); FUNCTIONS IN: laccase activity; INVOLVED IN: oxidation reduction
Medtr8g068580	'16.10'	'secondary metabolism.simple phenols'	quercetin 3-O-methyltransferase activity
Medtr0190s0020	'16.2'	'secondary metabolism.phenylpropanoids'	transferring acyl groups other than amino-acyl groups
Medtr1g014220	'16.2'	'secondary metabolism.phenylpropanoids'	general substrate transporter (InterPro:IPR016196)
Medtr1g026310	'16.2'	'secondary metabolism.phenylpropanoids'	jasmonic acid biosynthetic process
Medtr1g087760	'16.2'	'secondary metabolism.phenylpropanoids'	transferase activity
Medtr2g015430	'16.2'	'secondary metabolism.phenylpropanoids'	transferring acyl groups other than amino-acyl groups
Medtr3g008100	'16.2'	'secondary metabolism.phenylpropanoids'	which catalyzes NADPH-dependent reduction of 8-5' linked lignans such as dehydrodiconiferyl alcohol to give isodihydrodehydrodiconiferyl alcohol.; NmrA-like negative transcriptional regulator family protein; FUNCTIONS IN: phenylcoumaran benzylic ether reductase activity; INVOLVED IN: response to cadmium ion; LOCATED IN: cellular_component unknown; EXPRESSED IN: 25 plant structures; EXPRESSED DURI…
Medtr3g460770	'16.2'	'secondary metabolism.phenylpropanoids'	has in vitro activity towards medium- to long-chain fatty acids and their hydroxylated derivatives. Expressed in the tapetum. Involved in pollen wall exine formation. Null mutants were devoid of pollen grains at anther maturity and were completely male sterile.; acyl-CoA synthetase 5 (ACOS5); CONTAINS InterPro DOMAIN/s: AMP-dependent synthetase/ligase (InterPro:IPR000873); BEST Arabidopsis thalia…
Medtr3g465880	'16.2'	'secondary metabolism.phenylpropanoids'	transferring acyl groups other than amino-acyl groups
Medtr3g465950	'16.2'	'secondary metabolism.phenylpropanoids'	transferring acyl groups other than amino-acyl groups
Medtr4g022670	'16.2'	'secondary metabolism.phenylpropanoids'	transferring acyl groups other than amino-acyl groups
Medtr4g022720	'16.2'	'secondary metabolism.phenylpropanoids'	transferring acyl groups other than amino-acyl groups
Medtr4g022760	'16.2'	'secondary metabolism.phenylpropanoids'	transferring acyl groups other than amino-acyl groups
Medtr4g094832	'16.2'	'secondary metabolism.phenylpropanoids'	transferring acyl groups other than amino-acyl groups
Medtr5g027290	'16.2'	'secondary metabolism.phenylpropanoids'	NmrA-like (InterPro:IPR008030); BEST Arabidopsis thaliana protein match is: pinoresinol reductase 2 (TAIR:AT4G13660.1); Has 2085 Blast hits to 2085 proteins in 479 species: Archae - 27; Bacteria - 779; Metazoa - 2; Fungi - 496; Plants - 600; Viruses - 0; Other Eukaryotes - 181 (source: NCBI BLink). & (p52578|ifrh_soltu : 278.0) Isoflavone reductase homolog (EC 1.3.1.-) (CP100) - Solanum tuberosum…
Medtr5g090880	'16.2'	'secondary metabolism.phenylpropanoids'	transferring acyl groups other than amino-acyl groups
Medtr8g068590	'16.2'	'secondary metabolism.phenylpropanoids'	Plant methyltransferase dimerisation (InterPro:IPR012967)
Medtr8g071130	'16.2'	'secondary metabolism.phenylpropanoids'	NmrA-like (InterPro:IPR008030); BEST Arabidopsis thaliana protein match is: pinoresinol reductase 2 (TAIR:AT4G13660.1); Has 2085 Blast hits to 2085 proteins in 479 species: Archae - 27; Bacteria - 779; Metazoa - 2; Fungi - 496; Plants - 600; Viruses - 0; Other Eukaryotes - 181 (source: NCBI BLink). & (p52578|ifrh_soltu : 268.0) Isoflavone reductase homolog (EC 1.3.1.-) (CP100) - Solanum tuberosum…
Medtr1g094780	'16.2.1.1'	'secondary metabolism.phenylpropanoids.lignin biosynthesis.PAL'	AT3G53260 (PAL2)
Medtr7g101395	'16.2.1.1'	'secondary metabolism.phenylpropanoids.lignin biosynthesis.PAL'	a phenylalanine ammonia-lyase. Arabidopsis has four PALs: AT2G37040 (PAL1)
Medtr7g101425	'16.2.1.1'	'secondary metabolism.phenylpropanoids.lignin biosynthesis.PAL'	a phenylalanine ammonia-lyase. Arabidopsis has four PALs: AT2G37040 (PAL1)
Medtr1g025950	'16.2.1.10'	'secondary metabolism.phenylpropanoids.lignin biosynthesis.CAD'	zinc ion binding; INVOLVED IN: oxidation reduction; LOCATED IN: apoplast; EXPRESSED IN: 25 plant structures; EXPRESSED DURING: 15 growth stages; CONTAINS InterPro DOMAIN/s: GroES-like (InterPro:IPR011032)
Medtr4g115300	'16.2.1.10'	'secondary metabolism.phenylpropanoids.lignin biosynthesis.CAD'	zinc ion binding; INVOLVED IN: oxidation reduction; LOCATED IN: apoplast; EXPRESSED IN: 25 plant structures; EXPRESSED DURING: 15 growth stages; CONTAINS InterPro DOMAIN/s: GroES-like (InterPro:IPR011032)
Medtr5g031180	'16.2.1.10'	'secondary metabolism.phenylpropanoids.lignin biosynthesis.CAD'	zinc ion binding; INVOLVED IN: oxidation reduction; LOCATED IN: cellular_component unknown; EXPRESSED IN: 9 plant structures; EXPRESSED DURING: petal differentiation and expansion stage; CONTAINS InterPro DOMAIN/s: GroES-like (InterPro:IPR011032)
Medtr5g031190	'16.2.1.10'	'secondary metabolism.phenylpropanoids.lignin biosynthesis.CAD'	this enzyme does not have mannitol dehydrogenase activity.; elicitor-activated gene 3-2 (ELI3-2); CONTAINS InterPro DOMAIN/s: GroES-like (InterPro:IPR011032)
Medtr5g031300	'16.2.1.10'	'secondary metabolism.phenylpropanoids.lignin biosynthesis.CAD'	zinc ion binding; INVOLVED IN: response to bacterium
Medtr5g031305	'16.2.1.10'	'secondary metabolism.phenylpropanoids.lignin biosynthesis.CAD'	zinc ion binding; INVOLVED IN: response to bacterium
Medtr5g031360	'16.2.1.10'	'secondary metabolism.phenylpropanoids.lignin biosynthesis.CAD'	zinc ion binding; INVOLVED IN: response to bacterium
Medtr5g031390	'16.2.1.10'	'secondary metabolism.phenylpropanoids.lignin biosynthesis.CAD'	zinc ion binding; INVOLVED IN: response to bacterium
Medtr8g092630	'16.2.1.10'	'secondary metabolism.phenylpropanoids.lignin biosynthesis.CAD'	zinc ion binding; INVOLVED IN: oxidation reduction; LOCATED IN: apoplast; EXPRESSED IN: 25 plant structures; EXPRESSED DURING: 15 growth stages; CONTAINS InterPro DOMAIN/s: GroES-like (InterPro:IPR011032)
Medtr4g005750	'16.2.1.3'	'secondary metabolism.phenylpropanoids.lignin biosynthesis.4CL'	which is involved in the last step of the general phenylpropanoid pathway. The catalytic efficiency was in the following (descending) order: p-coumaric acid
Medtr4g077900	'16.2.1.3'	'secondary metabolism.phenylpropanoids.lignin biosynthesis.4CL'	conserved site (InterPro:IPR020845)
Medtr4g128337	'16.2.1.3'	'secondary metabolism.phenylpropanoids.lignin biosynthesis.4CL'	which is involved in the last step of the general phenylpropanoid pathway. The catalytic efficiency was in the following (descending) order: p-coumaric acid
Medtr1g107300	'16.2.1.5'	'secondary metabolism.phenylpropanoids.lignin biosynthesis.C3H'	family 76
Medtr4g085590	'16.2.1.6'	'secondary metabolism.phenylpropanoids.lignin biosynthesis.CCoAOMT'	response to cadmium ion; LOCATED IN: cytosol; EXPRESSED IN: 24 plant structures; EXPRESSED DURING: 14 growth stages; CONTAINS InterPro DOMAIN/s: O-methyltransferase
Medtr4g094815	'16.2.1.6'	'secondary metabolism.phenylpropanoids.lignin biosynthesis.CCoAOMT'	response to cadmium ion; LOCATED IN: cytosol; EXPRESSED IN: 24 plant structures; EXPRESSED DURING: 14 growth stages; CONTAINS InterPro DOMAIN/s: O-methyltransferase
Medtr4g094925	'16.2.1.6'	'secondary metabolism.phenylpropanoids.lignin biosynthesis.CCoAOMT'	response to cadmium ion; LOCATED IN: cytosol; EXPRESSED IN: 24 plant structures; EXPRESSED DURING: 14 growth stages; CONTAINS InterPro DOMAIN/s: O-methyltransferase
Medtr3g031650	'16.2.1.7'	'secondary metabolism.phenylpropanoids.lignin biosynthesis.CCR1'	binding
Medtr5g072620	'16.2.1.7'	'secondary metabolism.phenylpropanoids.lignin biosynthesis.CCR1'	binding
Medtr6g406250	'16.2.1.7'	'secondary metabolism.phenylpropanoids.lignin biosynthesis.CCR1'	binding
Medtr5g070700	'16.2.1.8'	'secondary metabolism.phenylpropanoids.lignin biosynthesis.F5H'	family 71
Medtr5g070920	'16.2.1.8'	'secondary metabolism.phenylpropanoids.lignin biosynthesis.F5H'	family 71
Medtr5g094840	'16.2.1.8'	'secondary metabolism.phenylpropanoids.lignin biosynthesis.F5H'	family 71
Medtr5g095260	'16.2.1.8'	'secondary metabolism.phenylpropanoids.lignin biosynthesis.F5H'	family 71
Medtr2g029430	'16.4.1'	'secondary metabolism.N misc.alkaloid-like'	carboxy-lyase activity
Medtr2g029450	'16.4.1'	'secondary metabolism.N misc.alkaloid-like'	carboxy-lyase activity
Medtr2g031510	'16.4.1'	'secondary metabolism.N misc.alkaloid-like'	oxidoreductase activity
Medtr3g068155	'16.4.1'	'secondary metabolism.N misc.alkaloid-like'	binding
Medtr4g050190	'16.4.1'	'secondary metabolism.N misc.alkaloid-like'	it lacks a conserved catalytic glutamate residue found in active SS enzymes and it is not expected to have SS activity.; strictosidine synthase-like 3 (SSL3); FUNCTIONS IN: strictosidine synthase activity; INVOLVED IN: alkaloid biosynthetic process
Medtr4g094492	'16.4.1'	'secondary metabolism.N misc.alkaloid-like'	oxidoreductase activity
Medtr4g112630	'16.4.1'	'secondary metabolism.N misc.alkaloid-like'	biosynthetic process; LOCATED IN: endoplasmic reticulum
Medtr5g091980	'16.4.1'	'secondary metabolism.N misc.alkaloid-like'	biosynthetic process; LOCATED IN: endoplasmic reticulum
Medtr7g063390	'16.4.1'	'secondary metabolism.N misc.alkaloid-like'	binding
Medtr7g098700	'16.4.1'	'secondary metabolism.N misc.alkaloid-like'	carboxy-lyase activity
Medtr7g490330	'16.4.1'	'secondary metabolism.N misc.alkaloid-like'	biosynthetic process; LOCATED IN: endoplasmic reticulum
Medtr2g034160	'16.4.2.1'	'secondary metabolism.N misc.betaine.betaine-aldehyde dehydrogenase'	oxidoreductase activity; INVOLVED IN: oxidation reduction
Medtr8g041600	'16.5.1.1.1.13'	'secondary metabolism.sulfur-containing.glucosinolates.synthesis.aliphatic.2-oxoglutarate-dependent dioxygenase'	T
Medtr6g038220	'16.5.1.1.1.8'	'secondary metabolism.sulfur-containing.glucosinolates.synthesis.aliphatic.UDP-glycosyltransferase'	UGT74E2
Medtr6g038230	'16.5.1.1.1.8'	'secondary metabolism.sulfur-containing.glucosinolates.synthesis.aliphatic.UDP-glycosyltransferase'	transferase activity
Medtr6g038300	'16.5.1.1.1.8'	'secondary metabolism.sulfur-containing.glucosinolates.synthesis.aliphatic.UDP-glycosyltransferase'	transferring hexosyl groups; INVOLVED IN: metabolic process; CONTAINS InterPro DOMAIN/s: UDP-glucuronosyl/UDP-glucosyltransferase (InterPro:IPR002213); BEST Arabidopsis thaliana protein match is: Uridine diphosphate glycosyltransferase 74E2 (TAIR:AT1G05680.1). & (q41819|iaag_maize : 339.0) Indole-3-acetate beta-glucosyltransferase (EC 2.4.1.121) (IAA-Glu synthetase) ((Uridine 5'-diphosphate-gluco…
Medtr0287s0060	'16.5.1.1.4.1'	'secondary metabolism.sulfur-containing.glucosinolates.synthesis.shared.CYP83B1 phenylacetaldoxime monooxygenase'	family 83
Medtr4g025950	'16.5.1.1.4.1'	'secondary metabolism.sulfur-containing.glucosinolates.synthesis.shared.CYP83B1 phenylacetaldoxime monooxygenase'	family 83
Medtr4g025970	'16.5.1.1.4.1'	'secondary metabolism.sulfur-containing.glucosinolates.synthesis.shared.CYP83B1 phenylacetaldoxime monooxygenase'	family 83
Medtr5g023680	'16.5.1.1.4.1'	'secondary metabolism.sulfur-containing.glucosinolates.synthesis.shared.CYP83B1 phenylacetaldoxime monooxygenase'	family 83
Medtr5g094570	'16.5.1.1.4.1'	'secondary metabolism.sulfur-containing.glucosinolates.synthesis.shared.CYP83B1 phenylacetaldoxime monooxygenase'	family 71
Medtr7g012860	'16.5.1.1.4.1'	'secondary metabolism.sulfur-containing.glucosinolates.synthesis.shared.CYP83B1 phenylacetaldoxime monooxygenase'	family 83
Medtr0008s0390	'16.5.1.2.1'	'secondary metabolism.sulfur-containing.glucosinolates.regulation.aliphatic'	DNA-binding (InterPro:IPR001005)
Medtr0008s0470	'16.5.1.2.3'	'secondary metabolism.sulfur-containing.glucosinolates.regulation.indole'	DNA-binding (InterPro:IPR001005)
Medtr0251s0050	'16.5.1.2.3'	'secondary metabolism.sulfur-containing.glucosinolates.regulation.indole'	DNA-binding (InterPro:IPR001005)
Medtr4g066340	'16.5.1.3.1'	'secondary metabolism.sulfur-containing.glucosinolates.degradation.myrosinase'	hydrolase activity
Medtr4g067040	'16.5.1.3.1'	'secondary metabolism.sulfur-containing.glucosinolates.degradation.myrosinase'	hydrolase activity
Medtr7g051510	'16.5.1.3.1'	'secondary metabolism.sulfur-containing.glucosinolates.degradation.myrosinase'	family 1 & (at5g44640 : 300.0) beta glucosidase 13 (BGLU13); FUNCTIONS IN: cation binding
Medtr5g011440	'16.5.1.4.1'	'secondary metabolism.sulfur-containing.glucosinolates.transport.aliphatic'	bile acid:sodium symporter activity; INVOLVED IN: sodium ion transport; LOCATED IN: membrane; EXPRESSED IN: 23 plant structures; EXPRESSED DURING: 14 growth stages; CONTAINS InterPro DOMAIN/s: Bile acid:sodium symporter (InterPro:IPR002657); BEST Arabidopsis thaliana protein match is: bile acid transporter 5 (TAIR:AT4G12030.2); Has 30201 Blast hits to 17322 proteins in 780 species: Archae - 12; B…
Medtr3g077250	'16.5.99.1'	'secondary metabolism.sulfur-containing.misc.alliinase'	carbon-sulfur lyase activity
Medtr4g105220	'16.5.99.1'	'secondary metabolism.sulfur-containing.misc.alliinase'	carbon-sulfur lyase activity
Medtr0003s0500	'16.7'	'secondary metabolism.wax'	T
Medtr1g110930	'16.7'	'secondary metabolism.wax'	a member of the 3-ketoacyl-CoA synthase family involved in the biosynthesis of VLCFA (very long chain fatty acids).; 3-ketoacyl-CoA synthase 6 (KCS6); FUNCTIONS IN: transferase activity
Medtr3g086190	'16.7'	'secondary metabolism.wax'	which catalyzes the first reduction during VLCFA (very long chain fatty acids
Medtr3g086210	'16.7'	'secondary metabolism.wax'	which catalyzes the first reduction during VLCFA (very long chain fatty acids
Medtr4g129630	'16.7'	'secondary metabolism.wax'	binding
Medtr5g056510	'16.7'	'secondary metabolism.wax'	a member of the 3-ketoacyl-CoA synthase family involved in the biosynthesis of VLCFA (very long chain fatty acids).; 3-ketoacyl-CoA synthase 6 (KCS6); FUNCTIONS IN: transferase activity
Medtr0023s0210	'16.8.1'	'secondary metabolism.flavonoids.anthocyanins'	DNA-binding (InterPro:IPR001005)
Medtr0197s0010	'16.8.1'	'secondary metabolism.flavonoids.anthocyanins'	DNA-binding (InterPro:IPR001005)
Medtr2g008226	'16.8.1'	'secondary metabolism.flavonoids.anthocyanins'	transferring glycosyl groups; INVOLVED IN: metabolic process; LOCATED IN: cellular_component unknown; CONTAINS InterPro DOMAIN/s: UDP-glucuronosyl/UDP-glucosyltransferase (InterPro:IPR002213); BEST Arabidopsis thaliana protein match is: UDP-Glycosyltransferase superfamily protein (TAIR:AT5G65550.1); Has 5420 Blast hits to 5242 proteins in 247 species: Archae - 0; Bacteria - 62; Metazoa - 299; Fun…
Medtr2g083390	'16.8.1'	'secondary metabolism.flavonoids.anthocyanins'	transferring glycosyl groups; INVOLVED IN: N-terminal protein myristoylation
Medtr3g040410	'16.8.1'	'secondary metabolism.flavonoids.anthocyanins'	iron ion binding; INVOLVED IN: oxidation reduction; LOCATED IN: cellular_component unknown; EXPRESSED IN: inflorescence meristem
Medtr4g077960	'16.8.1'	'secondary metabolism.flavonoids.anthocyanins'	transferring glycosyl groups; INVOLVED IN: metabolic process; LOCATED IN: cellular_component unknown; CONTAINS InterPro DOMAIN/s: UDP-glucuronosyl/UDP-glucosyltransferase (InterPro:IPR002213); BEST Arabidopsis thaliana protein match is: UDP-Glycosyltransferase superfamily protein (TAIR:AT5G65550.1); Has 5420 Blast hits to 5242 proteins in 247 species: Archae - 0; Bacteria - 62; Metazoa - 299; Fun…
Medtr6g042310	'16.8.1'	'secondary metabolism.flavonoids.anthocyanins'	transferring glycosyl groups; INVOLVED IN: metabolic process; LOCATED IN: cellular_component unknown; CONTAINS InterPro DOMAIN/s: UDP-glucuronosyl/UDP-glucosyltransferase (InterPro:IPR002213); BEST Arabidopsis thaliana protein match is: UDP-Glycosyltransferase superfamily protein (TAIR:AT5G65550.1); Has 5420 Blast hits to 5242 proteins in 247 species: Archae - 0; Bacteria - 62; Metazoa - 299; Fun…
Medtr7g067120	'16.8.1'	'secondary metabolism.flavonoids.anthocyanins'	transferring glycosyl groups; INVOLVED IN: metabolic process; LOCATED IN: cellular_component unknown; CONTAINS InterPro DOMAIN/s: UDP-glucuronosyl/UDP-glucosyltransferase (InterPro:IPR002213); BEST Arabidopsis thaliana protein match is: UDP-Glycosyltransferase superfamily protein (TAIR:AT5G65550.1); Has 5420 Blast hits to 5242 proteins in 247 species: Archae - 0; Bacteria - 62; Metazoa - 299; Fun…
Medtr7g067330	'16.8.1'	'secondary metabolism.flavonoids.anthocyanins'	transferring glycosyl groups; INVOLVED IN: metabolic process; LOCATED IN: cellular_component unknown; CONTAINS InterPro DOMAIN/s: UDP-glucuronosyl/UDP-glucosyltransferase (InterPro:IPR002213); BEST Arabidopsis thaliana protein match is: UDP-Glycosyltransferase superfamily protein (TAIR:AT5G65550.1); Has 5420 Blast hits to 5242 proteins in 247 species: Archae - 0; Bacteria - 62; Metazoa - 299; Fun…
Medtr8g068360	'16.8.1'	'secondary metabolism.flavonoids.anthocyanins'	transferring glycosyl groups; INVOLVED IN: metabolic process; LOCATED IN: cellular_component unknown; CONTAINS InterPro DOMAIN/s: UDP-glucuronosyl/UDP-glucosyltransferase (InterPro:IPR002213); BEST Arabidopsis thaliana protein match is: UDP-Glycosyltransferase superfamily protein (TAIR:AT5G65550.1); Has 5420 Blast hits to 5242 proteins in 247 species: Archae - 0; Bacteria - 62; Metazoa - 299; Fun…
Medtr5g011250	'16.8.1.1'	'secondary metabolism.flavonoids.anthocyanins.leucocyanidin dioxygenase'	which is involved in proanthocyanin biosynthesis. Mutant analysis suggests that this gene is also involved in vacuole formation.; leucoanthocyanidin dioxygenase (LDOX); CONTAINS InterPro DOMAIN/s: Oxoglutarate/iron-dependent oxygenase (InterPro:IPR005123); BEST Arabidopsis thaliana protein match is: flavonol synthase 1 (TAIR:AT5G08640.2); Has 35333 Blast hits to 34131 proteins in 2444 species: Ar…
Medtr2g013230	'16.8.1.2'	'secondary metabolism.flavonoids.anthocyanins.anthocyanidin reductase'	mutants accumulate flavonoid pigments in their seed coat
Medtr2g013250	'16.8.1.2'	'secondary metabolism.flavonoids.anthocyanins.anthocyanidin reductase'	NAD(P)-binding domain (InterPro:IPR016040); BEST Arabidopsis thaliana protein match is: NAD(P)-binding Rossmann-fold superfamily protein (TAIR:AT2G45400.1); Has 1807 Blast hits to 1807 proteins in 277 species: Archae - 0; Bacteria - 0; Metazoa - 736; Fungi - 347; Plants - 385; Viruses - 0; Other Eukaryotes - 339 (source: NCBI BLink). & (gnl|cdd|30800 : 90.4) no description available & (reliabilit…
Medtr2g013260	'16.8.1.2'	'secondary metabolism.flavonoids.anthocyanins.anthocyanidin reductase'	metabolic process; LOCATED IN: cellular_component unknown; EXPRESSED IN: 13 plant structures; EXPRESSED DURING: 6 growth stages; CONTAINS InterPro DOMAIN/s: NAD-dependent epimerase/dehydratase (InterPro:IPR001509)
Medtr2g089650	'16.8.1.21'	'secondary metabolism.flavonoids.anthocyanins.anthocyanin 5-aromatic acyltransferase'	transferring acyl groups other than amino-acyl groups
Medtr6g015830	'16.8.1.21'	'secondary metabolism.flavonoids.anthocyanins.anthocyanin 5-aromatic acyltransferase'	transferring acyl groups other than amino-acyl groups
Medtr7g014230	'16.8.1.21'	'secondary metabolism.flavonoids.anthocyanins.anthocyanin 5-aromatic acyltransferase'	transferring acyl groups other than amino-acyl groups
Medtr7g014330	'16.8.1.21'	'secondary metabolism.flavonoids.anthocyanins.anthocyanin 5-aromatic acyltransferase'	transferring acyl groups other than amino-acyl groups
Medtr7g014610	'16.8.1.21'	'secondary metabolism.flavonoids.anthocyanins.anthocyanin 5-aromatic acyltransferase'	transferring acyl groups other than amino-acyl groups
Medtr0374s0050	'16.8.2'	'secondary metabolism.flavonoids.chalcones'	Aldo/keto reductase subgroup (InterPro:IPR020471)
Medtr1g115870	'16.8.2'	'secondary metabolism.flavonoids.chalcones'	response to UV-B
Medtr1g115890	'16.8.2'	'secondary metabolism.flavonoids.chalcones'	response to UV-B
Medtr2g072510	'16.8.2'	'secondary metabolism.flavonoids.chalcones'	intramolecular lyase activity; INVOLVED IN: cellular amino acid derivative biosynthetic process
Medtr3g083130	'16.8.2'	'secondary metabolism.flavonoids.chalcones'	Aldo/keto reductase subgroup (InterPro:IPR020471)
Medtr3g088670	'16.8.2'	'secondary metabolism.flavonoids.chalcones'	a key enzyme involved in the biosynthesis of flavonoids. Required for the accumulation of purple anthocyanins in leaves and stems. Also involved in the regulation of auxin transport and the modulation of root gravitropism.; TRANSPARENT TESTA 4 (TT4); FUNCTIONS IN: naringenin-chalcone synthase activity; INVOLVED IN: in 11 processes; LOCATED IN: plant-type vacuole membrane
Medtr3g093980	'16.8.2'	'secondary metabolism.flavonoids.chalcones'	chalcone isomerase activity; INVOLVED IN: response to karrikin; LOCATED IN: cellular_component unknown; EXPRESSED IN: 20 plant structures; EXPRESSED DURING: 13 growth stages; CONTAINS InterPro DOMAIN/s: Chalcone isomerase
Medtr5g097910	'16.8.2'	'secondary metabolism.flavonoids.chalcones'	Aldo/keto reductase subgroup (InterPro:IPR020471)
Medtr5g097940	'16.8.2'	'secondary metabolism.flavonoids.chalcones'	Aldo/keto reductase subgroup (InterPro:IPR020471)
Medtr6g072650	'16.8.2'	'secondary metabolism.flavonoids.chalcones'	Aldo/keto reductase subgroup (InterPro:IPR020471)
Medtr7g063580	'16.8.2'	'secondary metabolism.flavonoids.chalcones'	4 anthesis
Medtr3g083920	'16.8.2.1'	'secondary metabolism.flavonoids.chalcones.naringenin-chalcone synthase'	a key enzyme involved in the biosynthesis of flavonoids. Required for the accumulation of purple anthocyanins in leaves and stems. Also involved in the regulation of auxin transport and the modulation of root gravitropism.; TRANSPARENT TESTA 4 (TT4); FUNCTIONS IN: naringenin-chalcone synthase activity; INVOLVED IN: in 11 processes; LOCATED IN: plant-type vacuole membrane
Medtr7g084300	'16.8.2.1'	'secondary metabolism.flavonoids.chalcones.naringenin-chalcone synthase'	a key enzyme involved in the biosynthesis of flavonoids. Required for the accumulation of purple anthocyanins in leaves and stems. Also involved in the regulation of auxin transport and the modulation of root gravitropism.; TRANSPARENT TESTA 4 (TT4); FUNCTIONS IN: naringenin-chalcone synthase activity; INVOLVED IN: in 11 processes; LOCATED IN: plant-type vacuole membrane
Medtr0009s0400	'16.8.3'	'secondary metabolism.flavonoids.dihydroflavonols'	acting on paired donors
Medtr0009s0480	'16.8.3'	'secondary metabolism.flavonoids.dihydroflavonols'	T
Medtr0078s0200	'16.8.3'	'secondary metabolism.flavonoids.dihydroflavonols'	T
Medtr0184s0030	'16.8.3'	'secondary metabolism.flavonoids.dihydroflavonols'	T
Medtr0328s0030	'16.8.3'	'secondary metabolism.flavonoids.dihydroflavonols'	T
Medtr1g070085	'16.8.3'	'secondary metabolism.flavonoids.dihydroflavonols'	acting on paired donors
Medtr1g070100	'16.8.3'	'secondary metabolism.flavonoids.dihydroflavonols'	acting on paired donors
Medtr3g092890	'16.8.3'	'secondary metabolism.flavonoids.dihydroflavonols'	acting on paired donors
Medtr4g082810	'16.8.3'	'secondary metabolism.flavonoids.dihydroflavonols'	T
Medtr4g082820	'16.8.3'	'secondary metabolism.flavonoids.dihydroflavonols'	T
Medtr5g032870	'16.8.3'	'secondary metabolism.flavonoids.dihydroflavonols'	acting on paired donors
Medtr5g032880	'16.8.3'	'secondary metabolism.flavonoids.dihydroflavonols'	acting on paired donors
Medtr5g055800	'16.8.3'	'secondary metabolism.flavonoids.dihydroflavonols'	T
Medtr5g065010	'16.8.3'	'secondary metabolism.flavonoids.dihydroflavonols'	acting on paired donors
Medtr5g070040	'16.8.3'	'secondary metabolism.flavonoids.dihydroflavonols'	UDP-glycosyltransferase activity
Medtr5g070090	'16.8.3'	'secondary metabolism.flavonoids.dihydroflavonols'	UDP-glycosyltransferase activity
Medtr7g046490	'16.8.3'	'secondary metabolism.flavonoids.dihydroflavonols'	T
Medtr8g006260	'16.8.3'	'secondary metabolism.flavonoids.dihydroflavonols'	T
Medtr8g006710	'16.8.3'	'secondary metabolism.flavonoids.dihydroflavonols'	UDP-glycosyltransferase activity
Medtr8g006730	'16.8.3'	'secondary metabolism.flavonoids.dihydroflavonols'	UDP-glycosyltransferase activity
Medtr8g008970	'16.8.3'	'secondary metabolism.flavonoids.dihydroflavonols'	T
Medtr8g008990	'16.8.3'	'secondary metabolism.flavonoids.dihydroflavonols'	T
Medtr8g009050	'16.8.3'	'secondary metabolism.flavonoids.dihydroflavonols'	T
Medtr8g012635	'16.8.3'	'secondary metabolism.flavonoids.dihydroflavonols'	T
Medtr8g027885	'16.8.3'	'secondary metabolism.flavonoids.dihydroflavonols'	T
Medtr1g022445	'16.8.3.1'	'secondary metabolism.flavonoids.dihydroflavonols.dihydroflavonol 4-reductase'	NAD(P)-binding domain (InterPro:IPR016040); BEST Arabidopsis thaliana protein match is: NAD(P)-binding Rossmann-fold superfamily protein (TAIR:AT2G45400.1); Has 1807 Blast hits to 1807 proteins in 277 species: Archae - 0; Bacteria - 0; Metazoa - 736; Fungi - 347; Plants - 385; Viruses - 0; Other Eukaryotes - 339 (source: NCBI BLink). & (gnl|cdd|36715 : 372.0) no description available & (gnl|cdd|3…
Medtr7g074710	'16.8.3.1'	'secondary metabolism.flavonoids.dihydroflavonols.dihydroflavonol 4-reductase'	oxidoreductase activity
Medtr7g074820	'16.8.3.1'	'secondary metabolism.flavonoids.dihydroflavonols.dihydroflavonol 4-reductase'	oxidoreductase activity
Medtr5g022020	'16.8.3.2'	'secondary metabolism.flavonoids.dihydroflavonols.flavanone 3-hydroxylase'	2-oxoglutarate 3-dioxygenase (EC 1.14.11.9) (Flavonone-3-hydroxylase) (F3H) (FHT) - Malus domestica (Apple) (Malus sylvestris) & (at3g51240 : 547.0) Encodes flavanone 3-hydroxylase that is coordinately expressed with chalcone synthase and chalcone isomerases. Regulates flavonoid biosynthesis.; flavanone 3-hydroxylase (F3H); CONTAINS InterPro DOMAIN/s: Oxoglutarate/iron-dependent oxygenase (InterP…
Medtr8g075830	'16.8.3.2'	'secondary metabolism.flavonoids.dihydroflavonols.flavanone 3-hydroxylase'	2-oxoglutarate 3-dioxygenase (EC 1.14.11.9) (Flavonone-3-hydroxylase) (F3H) (FHT) (Fragment) - Petunia hybrida (Petunia) & (gnl|cdd|35365 : 291.0) no description available & (gnl|cdd|33294 : 171.0) no description available & (reliability: 1206.0) & (original description: no original description)'
Medtr8g075890	'16.8.3.2'	'secondary metabolism.flavonoids.dihydroflavonols.flavanone 3-hydroxylase'	2-oxoglutarate 3-dioxygenase (EC 1.14.11.9) (Flavonone-3-hydroxylase) (F3H) (FHT) (Fragment) - Petunia hybrida (Petunia) & (at3g51240 : 622.0) Encodes flavanone 3-hydroxylase that is coordinately expressed with chalcone synthase and chalcone isomerases. Regulates flavonoid biosynthesis.; flavanone 3-hydroxylase (F3H); CONTAINS InterPro DOMAIN/s: Oxoglutarate/iron-dependent oxygenase (InterPro:IPR…
Medtr0155s0010	'16.8.3.3'	'secondary metabolism.flavonoids.dihydroflavonols.flavonoid 3''-monooxygenase'	family 706
Medtr3g025260	'16.8.3.3'	'secondary metabolism.flavonoids.dihydroflavonols.flavonoid 3''-monooxygenase'	Cytochrome P450
Medtr3g058380	'16.8.3.3'	'secondary metabolism.flavonoids.dihydroflavonols.flavonoid 3''-monooxygenase'	family 71
Medtr4g102280	'16.8.3.3'	'secondary metabolism.flavonoids.dihydroflavonols.flavonoid 3''-monooxygenase'	family 706
Medtr4g109470	'16.8.3.3'	'secondary metabolism.flavonoids.dihydroflavonols.flavonoid 3''-monooxygenase'	Cytochrome P450
Medtr7g056103	'16.8.3.3'	'secondary metabolism.flavonoids.dihydroflavonols.flavonoid 3''-monooxygenase'	family 93
Medtr8g020940	'16.8.3.3'	'secondary metabolism.flavonoids.dihydroflavonols.flavonoid 3''-monooxygenase'	Cytochrome P450
Medtr8g020950	'16.8.3.3'	'secondary metabolism.flavonoids.dihydroflavonols.flavonoid 3''-monooxygenase'	Cytochrome P450
Medtr0009s0410	'16.8.4'	'secondary metabolism.flavonoids.flavonols'	acting on paired donors
Medtr2g035020	'16.8.4'	'secondary metabolism.flavonoids.flavonols'	UDP-glycosyltransferase activity
Medtr8g074070	'16.8.4'	'secondary metabolism.flavonoids.flavonols'	acting on paired donors
Medtr0536s0020	'16.8.4.2'	'secondary metabolism.flavonoids.flavonols.flavonol 3-O-glycosyltransferase'	UDP-glycosyltransferase activity
Medtr4g108250	'16.8.4.2'	'secondary metabolism.flavonoids.flavonols.flavonol 3-O-glycosyltransferase'	transferring hexosyl groups
Medtr4g117890	'16.8.4.2'	'secondary metabolism.flavonoids.flavonols.flavonol 3-O-glycosyltransferase'	UDP-glycosyltransferase activity
Medtr4g117970	'16.8.4.2'	'secondary metabolism.flavonoids.flavonols.flavonol 3-O-glycosyltransferase'	UDP-glycosyltransferase activity
Medtr4g485630	'16.8.4.2'	'secondary metabolism.flavonoids.flavonols.flavonol 3-O-glycosyltransferase'	transferring hexosyl groups
Medtr7g071040	'16.8.4.2'	'secondary metabolism.flavonoids.flavonols.flavonol 3-O-glycosyltransferase'	transferring hexosyl groups
Medtr7g071050	'16.8.4.2'	'secondary metabolism.flavonoids.flavonols.flavonol 3-O-glycosyltransferase'	transferring hexosyl groups
Medtr8g044140	'16.8.4.2'	'secondary metabolism.flavonoids.flavonols.flavonol 3-O-glycosyltransferase'	UDP-glycosyltransferase activity
Medtr4g128690	'16.8.4.3'	'secondary metabolism.flavonoids.flavonols.flavonol-3-O-rhamnosyltransferase'	T
Medtr3g007970	'16.8.5.1'	'secondary metabolism.flavonoids.isoflavones.isoflavone reductase'	putative
Medtr3g111980	'16.8.5.1'	'secondary metabolism.flavonoids.isoflavones.isoflavone reductase'	which catalyzes NADPH-dependent reduction of 8-5' linked lignans such as dehydrodiconiferyl alcohol to give isodihydrodehydrodiconiferyl alcohol.; NmrA-like negative transcriptional regulator family protein; FUNCTIONS IN: phenylcoumaran benzylic ether reductase activity; INVOLVED IN: response to cadmium ion; LOCATED IN: cellular_component unknown; EXPRESSED IN: 25 plant structures; EXPRESSED DURI…
Medtr3g111990	'16.8.5.1'	'secondary metabolism.flavonoids.isoflavones.isoflavone reductase'	which catalyzes NADPH-dependent reduction of 8-5' linked lignans such as dehydrodiconiferyl alcohol to give isodihydrodehydrodiconiferyl alcohol.; NmrA-like negative transcriptional regulator family protein; FUNCTIONS IN: phenylcoumaran benzylic ether reductase activity; INVOLVED IN: response to cadmium ion; LOCATED IN: cellular_component unknown; EXPRESSED IN: 25 plant structures; EXPRESSED DURI…
Medtr4g070360	'16.8.5.1'	'secondary metabolism.flavonoids.isoflavones.isoflavone reductase'	NmrA-like (InterPro:IPR008030); BEST Arabidopsis thaliana protein match is: NmrA-like negative transcriptional regulator family protein (TAIR:AT1G75280.1); Has 2050 Blast hits to 2046 proteins in 499 species: Archae - 10; Bacteria - 767; Metazoa - 6; Fungi - 470; Plants - 578; Viruses - 7; Other Eukaryotes - 212 (source: NCBI BLink). & (p52579|ifrh_tobac : 287.0) Isoflavone reductase homolog A622…
Medtr5g020740	'16.8.5.1'	'secondary metabolism.flavonoids.isoflavones.isoflavone reductase'	putative
Medtr5g018365	'17'	'hormone metabolism'	methyl salicylate esterase activity
Medtr8g008660	'17'	'hormone metabolism'	methyl salicylate esterase activity
Medtr5g087410	'17.1.1'	'hormone metabolism.abscisic acid.synthesis-degradation'	Ferredoxin (InterPro:IPR001041)
Medtr5g090580	'17.1.1'	'hormone metabolism.abscisic acid.synthesis-degradation'	a UDP glycosyltransferase (UGT). HYR1 glucosylates hypostatin
Medtr5g090600	'17.1.1'	'hormone metabolism.abscisic acid.synthesis-degradation'	a UDP glycosyltransferase (UGT). HYR1 glucosylates hypostatin
Medtr5g090700	'17.1.1'	'hormone metabolism.abscisic acid.synthesis-degradation'	a UDP glycosyltransferase (UGT). HYR1 glucosylates hypostatin
Medtr5g098930	'17.1.1'	'hormone metabolism.abscisic acid.synthesis-degradation'	a UDP glycosyltransferase (UGT). HYR1 glucosylates hypostatin
Medtr5g017350	'17.1.1.1.1'	'hormone metabolism.abscisic acid.synthesis-degradation.synthesis.zeaxanthin epoxidase'	chloroplast precursor (EC 1.14.13.90) - Nicotiana plumbaginifolia (Leadwort-leaved tobacco) & (at5g67030 : 865.0) Encodes a single copy zeaxanthin epoxidase gene that functions in first step of the biosynthesis of the abiotic stress hormone abscisic acid (ABA). Mutants in this gene are unable to express female sterility in response to beta-aminobutyric acid
Medtr5g025230	'17.1.1.1.10'	'hormone metabolism.abscisic acid.synthesis-degradation.synthesis.9-cis-epoxycarotenoid dioxygenase'	plastoglobule; EXPRESSED IN: 16 plant structures; EXPRESSED DURING: 9 growth stages; CONTAINS InterPro DOMAIN/s: Carotenoid oxygenase (InterPro:IPR004294); BEST Arabidopsis thaliana protein match is: nine-cis-epoxycarotenoid dioxygenase 5 (TAIR:AT1G30100.1); Has 2918 Blast hits to 2864 proteins in 491 species: Archae - 16; Bacteria - 796; Metazoa - 323; Fungi - 173; Plants - 887; Viruses - 0; Oth…
Medtr5g025250	'17.1.1.1.10'	'hormone metabolism.abscisic acid.synthesis-degradation.synthesis.9-cis-epoxycarotenoid dioxygenase'	plastoglobule; EXPRESSED IN: 16 plant structures; EXPRESSED DURING: 9 growth stages; CONTAINS InterPro DOMAIN/s: Carotenoid oxygenase (InterPro:IPR004294); BEST Arabidopsis thaliana protein match is: nine-cis-epoxycarotenoid dioxygenase 5 (TAIR:AT1G30100.1); Has 2918 Blast hits to 2864 proteins in 491 species: Archae - 16; Bacteria - 796; Metazoa - 323; Fungi - 173; Plants - 887; Viruses - 0; Oth…
Medtr4g052350	'17.1.1.1.11'	'hormone metabolism.abscisic acid.synthesis-degradation.synthesis.short chain alcohol dehydrogenmase (ABA2)'	binding
Medtr8g072260	'17.1.1.2.1'	'hormone metabolism.abscisic acid.synthesis-degradation.degradation.8-hydroxylase'	involved in ABA catabolism. Member of the CYP707A gene family. CYP707A1 appears to play an important role in determining the ABA levels in dry seeds. Gene involved in postgermination growth. Overexpression of CYP707A1 leads to a decrease in ABA levels and a reduction in after-ripening period to break dormancy.; "cytochrome P450
Medtr2g040500	'17.1.2'	'hormone metabolism.abscisic acid.signal transduction'	catalytic activity; INVOLVED IN: protein amino acid dephosphorylation; LOCATED IN: protein serine/threonine phosphatase complex; EXPRESSED IN: 23 plant structures; EXPRESSED DURING: 14 growth stages; CONTAINS InterPro DOMAIN/s: Protein phosphatase 2C
Medtr6g007490	'17.1.2'	'hormone metabolism.abscisic acid.signal transduction'	human homologs of bacterial lanthionine synthetase.; GCR2-like 2 (GCL2); FUNCTIONS IN: catalytic activity; INVOLVED IN: biological_process unknown; LOCATED IN: extrinsic to membrane; EXPRESSED IN: 15 plant structures; EXPRESSED DURING: 10 growth stages; CONTAINS InterPro DOMAIN/s: LanC-like protein
Medtr2g076350	'17.1.3'	'hormone metabolism.abscisic acid.induced-regulated-responsive-activated'	T
Medtr4g093260	'17.1.3'	'hormone metabolism.abscisic acid.induced-regulated-responsive-activated'	hyperosmotic salinity response
Medtr4g093510	'17.1.3'	'hormone metabolism.abscisic acid.induced-regulated-responsive-activated'	response to cold
Medtr4g108350	'17.1.3'	'hormone metabolism.abscisic acid.induced-regulated-responsive-activated'	response to cold
Medtr5g039530	'17.1.3'	'hormone metabolism.abscisic acid.induced-regulated-responsive-activated'	hyperosmotic salinity response
Medtr8g096670	'17.1.3'	'hormone metabolism.abscisic acid.induced-regulated-responsive-activated'	it may be involved in regulation of autophagy during development.; HVA22 homologue D (HVA22D); FUNCTIONS IN: molecular_function unknown; INVOLVED IN: in 7 processes; LOCATED IN: cellular_component unknown; EXPRESSED IN: 23 plant structures; EXPRESSED DURING: 15 growth stages; CONTAINS InterPro DOMAIN/s: TB2/DP1/HVA22 related protein (InterPro:IPR004345); BEST Arabidopsis thaliana protein match is…
Medtr3g054330	'17.2.1'	'hormone metabolism.auxin.synthesis-degradation'	T
Medtr3g084530	'17.2.1'	'hormone metabolism.auxin.synthesis-degradation'	transferase activity
Medtr1g030890	'17.2.2'	'hormone metabolism.auxin.signal transduction'	with PIN3 protein accumulating predominantly at the lateral cell surface. PIN3 localizes to the plasma membrane and to vesicles. In roots
Medtr4g048220	'17.2.2'	'hormone metabolism.auxin.signal transduction'	primarily
Medtr4g134620	'17.2.2'	'hormone metabolism.auxin.signal transduction'	but not to gibberellins or brassinolide. Displayed developmental phenotypes similar to those of axr1
Medtr6g011400	'17.2.2'	'hormone metabolism.auxin.signal transduction'	transporter activity; INVOLVED IN: auxin polar transport
Medtr7g079720	'17.2.2'	'hormone metabolism.auxin.signal transduction'	an atypical member of the PIN family. PIN5 is a functional auxin transporter that is required for auxin-mediated development. PIN5 does not have a direct role in cell-to-cell transport but regulates intracellular auxin homeostasis and metabolism. PIN5 localizes
Medtr8g098695	'17.2.2'	'hormone metabolism.auxin.signal transduction'	ASK2 and AtCUL1 to form SCF-TIR1
Medtr8g107360	'17.2.2'	'hormone metabolism.auxin.signal transduction'	pin1 mutants are characterised by an inflorescence meristem that does not initiate any flowers
Medtr0102s0060	'17.2.3'	'hormone metabolism.auxin.induced-regulated-responsive-activated'	response to light stimulus; LOCATED IN: chloroplast; EXPRESSED IN: 24 plant structures; EXPRESSED DURING: 14 growth stages; CONTAINS InterPro DOMAIN/s: GH3 auxin-responsive promoter (InterPro:IPR004993); BEST Arabidopsis thaliana protein match is: Auxin-responsive GH3 family protein (TAIR:AT2G46370.4); Has 1425 Blast hits to 1352 proteins in 234 species: Archae - 0; Bacteria - 486; Metazoa - 52; …
Medtr0388s0020	'17.2.3'	'hormone metabolism.auxin.induced-regulated-responsive-activated'	T
Medtr1g031590	'17.2.3'	'hormone metabolism.auxin.induced-regulated-responsive-activated'	T
Medtr1g088765	'17.2.3'	'hormone metabolism.auxin.induced-regulated-responsive-activated'	a member of the GH3 family auxin-responsive genes. gh3.9-1 mutants had greater primary root length
Medtr2g026080	'17.2.3'	'hormone metabolism.auxin.induced-regulated-responsive-activated'	eukaryote (InterPro:IPR004877)
Medtr2g048210	'17.2.3'	'hormone metabolism.auxin.induced-regulated-responsive-activated'	lateral root morphogenesis; LOCATED IN: plasma membrane; EXPRESSED IN: 23 plant structures; EXPRESSED DURING: 13 growth stages; BEST Arabidopsis thaliana protein match is: Outer arm dynein light chain 1 protein (TAIR:AT1G78230.1); Has 5746 Blast hits to 1796 proteins in 310 species: Archae - 0; Bacteria - 1053; Metazoa - 771; Fungi - 422; Plants - 290; Viruses - 42; Other Eukaryotes - 3168 (sourc…
Medtr2g095430	'17.2.3'	'hormone metabolism.auxin.induced-regulated-responsive-activated'	T
Medtr3g084150	'17.2.3'	'hormone metabolism.auxin.induced-regulated-responsive-activated'	response to cold; LOCATED IN: plasma membrane; EXPRESSED IN: 21 plant structures; EXPRESSED DURING: 13 growth stages; CONTAINS InterPro DOMAIN/s: Auxin responsive SAUR protein (InterPro:IPR003676); BEST Arabidopsis thaliana protein match is: SAUR-like auxin-responsive protein family (TAIR:AT2G21210.1); Has 1324 Blast hits to 1312 proteins in 28 species: Archae - 0; Bacteria - 0; Metazoa - 0; Fung…
Medtr3g099480	'17.2.3'	'hormone metabolism.auxin.induced-regulated-responsive-activated'	T
Medtr4g072190	'17.2.3'	'hormone metabolism.auxin.induced-regulated-responsive-activated'	T
Medtr4g072600	'17.2.3'	'hormone metabolism.auxin.induced-regulated-responsive-activated'	response to cold; LOCATED IN: plasma membrane; EXPRESSED IN: 21 plant structures; EXPRESSED DURING: 13 growth stages; CONTAINS InterPro DOMAIN/s: Auxin responsive SAUR protein (InterPro:IPR003676); BEST Arabidopsis thaliana protein match is: SAUR-like auxin-responsive protein family (TAIR:AT2G21210.1); Has 1324 Blast hits to 1312 proteins in 28 species: Archae - 0; Bacteria - 0; Metazoa - 0; Fung…
Medtr4g072680	'17.2.3'	'hormone metabolism.auxin.induced-regulated-responsive-activated'	response to cold; LOCATED IN: plasma membrane; EXPRESSED IN: 21 plant structures; EXPRESSED DURING: 13 growth stages; CONTAINS InterPro DOMAIN/s: Auxin responsive SAUR protein (InterPro:IPR003676); BEST Arabidopsis thaliana protein match is: SAUR-like auxin-responsive protein family (TAIR:AT2G21210.1); Has 1324 Blast hits to 1312 proteins in 28 species: Archae - 0; Bacteria - 0; Metazoa - 0; Fung…
Medtr4g072690	'17.2.3'	'hormone metabolism.auxin.induced-regulated-responsive-activated'	response to cold; LOCATED IN: plasma membrane; EXPRESSED IN: 21 plant structures; EXPRESSED DURING: 13 growth stages; CONTAINS InterPro DOMAIN/s: Auxin responsive SAUR protein (InterPro:IPR003676); BEST Arabidopsis thaliana protein match is: SAUR-like auxin-responsive protein family (TAIR:AT2G21210.1); Has 1324 Blast hits to 1312 proteins in 28 species: Archae - 0; Bacteria - 0; Metazoa - 0; Fung…
Medtr4g072770	'17.2.3'	'hormone metabolism.auxin.induced-regulated-responsive-activated'	response to cold; LOCATED IN: plasma membrane; EXPRESSED IN: 21 plant structures; EXPRESSED DURING: 13 growth stages; CONTAINS InterPro DOMAIN/s: Auxin responsive SAUR protein (InterPro:IPR003676); BEST Arabidopsis thaliana protein match is: SAUR-like auxin-responsive protein family (TAIR:AT2G21210.1); Has 1324 Blast hits to 1312 proteins in 28 species: Archae - 0; Bacteria - 0; Metazoa - 0; Fung…
Medtr4g072860	'17.2.3'	'hormone metabolism.auxin.induced-regulated-responsive-activated'	response to cold; LOCATED IN: plasma membrane; EXPRESSED IN: 21 plant structures; EXPRESSED DURING: 13 growth stages; CONTAINS InterPro DOMAIN/s: Auxin responsive SAUR protein (InterPro:IPR003676); BEST Arabidopsis thaliana protein match is: SAUR-like auxin-responsive protein family (TAIR:AT2G21210.1); Has 1324 Blast hits to 1312 proteins in 28 species: Archae - 0; Bacteria - 0; Metazoa - 0; Fung…
Medtr4g072870	'17.2.3'	'hormone metabolism.auxin.induced-regulated-responsive-activated'	response to cold; LOCATED IN: plasma membrane; EXPRESSED IN: 21 plant structures; EXPRESSED DURING: 13 growth stages; CONTAINS InterPro DOMAIN/s: Auxin responsive SAUR protein (InterPro:IPR003676); BEST Arabidopsis thaliana protein match is: SAUR-like auxin-responsive protein family (TAIR:AT2G21210.1); Has 1324 Blast hits to 1312 proteins in 28 species: Archae - 0; Bacteria - 0; Metazoa - 0; Fung…
Medtr4g072880	'17.2.3'	'hormone metabolism.auxin.induced-regulated-responsive-activated'	response to cold; LOCATED IN: plasma membrane; EXPRESSED IN: 21 plant structures; EXPRESSED DURING: 13 growth stages; CONTAINS InterPro DOMAIN/s: Auxin responsive SAUR protein (InterPro:IPR003676); BEST Arabidopsis thaliana protein match is: SAUR-like auxin-responsive protein family (TAIR:AT2G21210.1); Has 1324 Blast hits to 1312 proteins in 28 species: Archae - 0; Bacteria - 0; Metazoa - 0; Fung…
Medtr4g082310	'17.2.3'	'hormone metabolism.auxin.induced-regulated-responsive-activated'	T
Medtr5g097620	'17.2.3'	'hormone metabolism.auxin.induced-regulated-responsive-activated'	eukaryote (InterPro:IPR004877)
Medtr7g017330	'17.2.3'	'hormone metabolism.auxin.induced-regulated-responsive-activated'	T
Medtr7g114970	'17.2.3'	'hormone metabolism.auxin.induced-regulated-responsive-activated'	aldo-keto reductase activity; INVOLVED IN: oxidation reduction; LOCATED IN: plasma membrane
Medtr8g011650	'17.2.3'	'hormone metabolism.auxin.induced-regulated-responsive-activated'	lateral root morphogenesis
Medtr8g026730	'17.2.3'	'hormone metabolism.auxin.induced-regulated-responsive-activated'	T
Medtr8g027920	'17.2.3'	'hormone metabolism.auxin.induced-regulated-responsive-activated'	(e.g. the ability to synthesize adenosine 5'-tetraphosphate and other JA conjugates)
Medtr8g027965	'17.2.3'	'hormone metabolism.auxin.induced-regulated-responsive-activated'	(e.g. the ability to synthesize adenosine 5'-tetraphosphate and other JA conjugates)
Medtr8g461420	'17.2.3'	'hormone metabolism.auxin.induced-regulated-responsive-activated'	T
Medtr6g037340	'17.3.1.1.1'	'hormone metabolism.brassinosteroid.synthesis-degradation.BRs.DET2'	acting on the CH-CH group of donors
Medtr6g037370	'17.3.1.1.1'	'hormone metabolism.brassinosteroid.synthesis-degradation.BRs.DET2'	acting on the CH-CH group of donors
Medtr6g043740	'17.3.1.1.1'	'hormone metabolism.brassinosteroid.synthesis-degradation.BRs.DET2'	acting on the CH-CH group of donors
Medtr7g066760	'17.3.1.1.1'	'hormone metabolism.brassinosteroid.synthesis-degradation.BRs.DET2'	brassinosteroid homeostasis
Medtr3g070380	'17.3.1.1.3'	'hormone metabolism.brassinosteroid.synthesis-degradation.BRs.CPD'	a cytochrome P450 monooxygenase which converts 6-deoxocathasterone to 6-deoxoteasterone in the late C6 oxidation pathway and cathasterone to teasterone in the early C6 oxidation pathway of brassinolide biosynthesis. Expressed in cotyledons and leaves. Mutants display de-etiolation and derepression of light-induced genes in the dark
Medtr5g082520	'17.3.1.1.3'	'hormone metabolism.brassinosteroid.synthesis-degradation.BRs.CPD'	a cytochrome P450 monooxygenase which converts 6-deoxocathasterone to 6-deoxoteasterone in the late C6 oxidation pathway and cathasterone to teasterone in the early C6 oxidation pathway of brassinolide biosynthesis. Expressed in cotyledons and leaves. Mutants display de-etiolation and derepression of light-induced genes in the dark
Medtr2g072330	'17.3.1.1.5'	'hormone metabolism.brassinosteroid.synthesis-degradation.BRs.metabolic regulation'	family 72
Medtr4g113650	'17.3.1.1.5'	'hormone metabolism.brassinosteroid.synthesis-degradation.BRs.metabolic regulation'	oxygen binding; INVOLVED IN: response to light stimulus
Medtr5g021220	'17.3.1.1.99'	'hormone metabolism.brassinosteroid.synthesis-degradation.BRs.other'	most likely in the conversion step of typhasterol (TY) to castasterone (CS). As 6-deoxo-CS was unable to restore the phenotype of rot3-1
Medtr3g032530	'17.3.1.2.2'	'hormone metabolism.brassinosteroid.synthesis-degradation.sterols.SMT2'	Methyltransferase type 11 (InterPro:IPR013216); BEST Arabidopsis thaliana protein match is: sterol methyltransferase 3 (TAIR:AT1G76090.1); Has 12253 Blast hits to 12250 proteins in 2286 species: Archae - 352; Bacteria - 8578; Metazoa - 91; Fungi - 457; Plants - 727; Viruses - 0; Other Eukaryotes - 2048 (source: NCBI BLink). & (q6zix2|smt1_orysa : 583.0) Cycloartenol-C-24-methyltransferase 1 (EC 2…
Medtr3g114780	'17.3.1.2.2'	'hormone metabolism.brassinosteroid.synthesis-degradation.sterols.SMT2'	serrated petals and sepals and altered cotyledon vascular patterning as well as ectopic endoreduplication. This suggests that suppression of endoreduplication is important for petal morphogenesis and that normal sterol composition is required for this suppression.; sterol methyltransferase 2 (SMT2); FUNCTIONS IN: S-adenosylmethionine-dependent methyltransferase activity; INVOLVED IN: xylem and ph…
Medtr8g006450	'17.3.1.2.3'	'hormone metabolism.brassinosteroid.synthesis-degradation.sterols.CYP51'	oxygen binding; INVOLVED IN: sterol biosynthetic process
Medtr8g006495	'17.3.1.2.3'	'hormone metabolism.brassinosteroid.synthesis-degradation.sterols.CYP51'	oxygen binding; INVOLVED IN: sterol biosynthetic process
Medtr1g061240	'17.3.1.2.4'	'hormone metabolism.brassinosteroid.synthesis-degradation.sterols.FACKEL'	embryo development ending in seed dormancy; LOCATED IN: endomembrane system
Medtr6g018860	'17.3.1.2.6'	'hormone metabolism.brassinosteroid.synthesis-degradation.sterols.DWF7'	catalyzes delta7 sterol C-5 desaturation step. Mutant has dwarf phenotype.; sterol 1 (STE1); FUNCTIONS IN: C-5 sterol desaturase activity; INVOLVED IN: sterol biosynthetic process
Medtr4g074350	'17.3.1.2.8'	'hormone metabolism.brassinosteroid.synthesis-degradation.sterols.DWF1'	FAD-binding
Medtr3g089010	'17.3.1.2.99'	'hormone metabolism.brassinosteroid.synthesis-degradation.sterols.other'	sterol biosynthetic process
Medtr4g092640	'17.3.1.2.99'	'hormone metabolism.brassinosteroid.synthesis-degradation.sterols.other'	based on sequence similarities
Medtr0640s0020	'17.3.2.1'	'hormone metabolism.brassinosteroid.signal transduction.BRI'	a potent elicitor of the defense response. FLS2 is directed for degradation by the bacterial ubiquitin ligase AvrPtoB.; FLAGELLIN-SENSITIVE 2 (FLS2); FUNCTIONS IN: protein serine/threonine kinase activity
Medtr3g041560	'17.3.2.1'	'hormone metabolism.brassinosteroid.signal transduction.BRI'	defense response to fungus
Medtr3g048740	'17.3.2.1'	'hormone metabolism.brassinosteroid.signal transduction.BRI'	defense response; LOCATED IN: chloroplast; EXPRESSED IN: 10 plant structures; EXPRESSED DURING: 10 growth stages; CONTAINS InterPro DOMAIN/s: Leucine-rich repeat
Medtr3g117910	'17.3.2.1'	'hormone metabolism.brassinosteroid.signal transduction.BRI'	brassinosteroid receptor protein.; BRI1-like 2 (BRL2); FUNCTIONS IN: protein binding
Medtr3g449240	'17.3.2.1'	'hormone metabolism.brassinosteroid.signal transduction.BRI'	defense response to fungus
Medtr3g452770	'17.3.2.1'	'hormone metabolism.brassinosteroid.signal transduction.BRI'	defense response to fungus
Medtr8g020640	'17.3.2.1'	'hormone metabolism.brassinosteroid.signal transduction.BRI'	brassinosteroid receptor protein.; BRI1-like 2 (BRL2); FUNCTIONS IN: protein binding
Medtr1g076470	'17.3.2.99'	'hormone metabolism.brassinosteroid.signal transduction.other'	T
Medtr2g008370	'17.3.2.99'	'hormone metabolism.brassinosteroid.signal transduction.other'	when BAK1 and BRI1 are coexpressed
Medtr2g008380	'17.3.2.99'	'hormone metabolism.brassinosteroid.signal transduction.other'	when BAK1 and BRI1 are coexpressed
Medtr2g098510	'17.3.3'	'hormone metabolism.brassinosteroid.induced-regulated-responsive-activated'	TOP6B. Is essential for endoreduplication and is involved in cell expansion and cell proliferation.; topoisomerase 6 subunit B (TOP6B); CONTAINS InterPro DOMAIN/s: DNA topoisomerase VI
Medtr1g072540	'17.4.1'	'hormone metabolism.cytokinin.synthesis-degradation'	otherwise to the chloroplast.; isopentenyltransferase 3 (IPT3); CONTAINS InterPro DOMAIN/s: tRNA isopentenyltransferase (InterPro:IPR002627); BEST Arabidopsis thaliana protein match is: isopentenyltransferase 5 (TAIR:AT5G19040.1); Has 30201 Blast hits to 17322 proteins in 780 species: Archae - 12; Bacteria - 1396; Metazoa - 17338; Fungi - 3422; Plants - 5037; Viruses - 0; Other Eukaryotes - 2996 …
Medtr3g036100	'17.4.1'	'hormone metabolism.cytokinin.synthesis-degradation'	which catalyzes the degradation of cytokinins.; cytokinin oxidase/dehydrogenase 6 (CKX6); CONTAINS InterPro DOMAIN/s: Cytokinin dehydrogenase 1
Medtr3g479470	'17.4.1'	'hormone metabolism.cytokinin.synthesis-degradation'	transferase activity
Medtr4g031800	'17.4.1'	'hormone metabolism.cytokinin.synthesis-degradation'	UDP-glycosyltransferase activity
Medtr4g117330	'17.4.1'	'hormone metabolism.cytokinin.synthesis-degradation'	T
Medtr4g126150	'17.4.1'	'hormone metabolism.cytokinin.synthesis-degradation'	which catalyzes the degradation of cytokinins.; cytokinin oxidase 3 (CKX3); FUNCTIONS IN: primary amine oxidase activity
Medtr5g031830	'17.4.1'	'hormone metabolism.cytokinin.synthesis-degradation'	which has been classified as a bHLH protein (AtbHLH152). Subsequently it has been found that the AAF87154 protein appears to be encoded by the AT1G23970 genomic locus.; UDP-glucosyl transferase 85A3 (UGT85A3); FUNCTIONS IN: transferase activity
Medtr5g031840	'17.4.1'	'hormone metabolism.cytokinin.synthesis-degradation'	which has been classified as a bHLH protein (AtbHLH152). Subsequently it has been found that the AAF87154 protein appears to be encoded by the AT1G23970 genomic locus.; UDP-glucosyl transferase 85A3 (UGT85A3); FUNCTIONS IN: transferase activity
Medtr5g031860	'17.4.1'	'hormone metabolism.cytokinin.synthesis-degradation'	which has been classified as a bHLH protein (AtbHLH152). Subsequently it has been found that the AAF87154 protein appears to be encoded by the AT1G23970 genomic locus.; UDP-glucosyl transferase 85A3 (UGT85A3); FUNCTIONS IN: transferase activity
Medtr6g011340	'17.4.1'	'hormone metabolism.cytokinin.synthesis-degradation'	transferase activity
Medtr6g014160	'17.4.1'	'hormone metabolism.cytokinin.synthesis-degradation'	transferase activity
Medtr6g014186	'17.4.1'	'hormone metabolism.cytokinin.synthesis-degradation'	transferase activity
Medtr6g014187	'17.4.1'	'hormone metabolism.cytokinin.synthesis-degradation'	which has been classified as a bHLH protein (AtbHLH152). Subsequently it has been found that the AAF87154 protein appears to be encoded by the AT1G23970 genomic locus.; UDP-glucosyl transferase 85A3 (UGT85A3); FUNCTIONS IN: transferase activity
Medtr6g014190	'17.4.1'	'hormone metabolism.cytokinin.synthesis-degradation'	T
Medtr6g014200	'17.4.1'	'hormone metabolism.cytokinin.synthesis-degradation'	T
Medtr6g014220	'17.4.1'	'hormone metabolism.cytokinin.synthesis-degradation'	transferase activity
Medtr6g014250	'17.4.1'	'hormone metabolism.cytokinin.synthesis-degradation'	transferase activity
Medtr6g014290	'17.4.1'	'hormone metabolism.cytokinin.synthesis-degradation'	transferase activity
Medtr8g075340	'17.4.2'	'hormone metabolism.cytokinin.signal transduction'	protein histidine kinase activity
Medtr8g106150	'17.4.2'	'hormone metabolism.cytokinin.signal transduction'	cytokine binding
Medtr2g069210	'17.5.1'	'hormone metabolism.ethylene.synthesis-degradation'	T
Medtr5g016770	'17.5.1'	'hormone metabolism.ethylene.synthesis-degradation'	core (InterPro:IPR000644); BEST Arabidopsis thaliana protein match is: Cystathionine beta-synthase (CBS) family protein (TAIR:AT4G34120.1); Has 8411 Blast hits to 7757 proteins in 1885 species: Archae - 1245; Bacteria - 5956; Metazoa - 278; Fungi - 143; Plants - 147; Viruses - 0; Other Eukaryotes - 642 (source: NCBI BLink). & (reliability: 388.0) & (original description: no original description)'
Medtr8g008930	'17.5.1'	'hormone metabolism.ethylene.synthesis-degradation'	T
Medtr8g009170	'17.5.1'	'hormone metabolism.ethylene.synthesis-degradation'	T
Medtr8g107670	'17.5.1'	'hormone metabolism.ethylene.synthesis-degradation'	H2S
Medtr6g091760	'17.5.1.1'	'hormone metabolism.ethylene.synthesis-degradation.1-aminocyclopropane-1-carboxylate synthase'	an enzyme involved in ethylene biosynthesis. Not expressed in response to IAA.; 1-amino-cyclopropane-1-carboxylate synthase 7 (ACS7); CONTAINS InterPro DOMAIN/s: 1-aminocyclopropane-1-carboxylate synthase (InterPro:IPR001176)
Medtr6g463260	'17.5.1.1'	'hormone metabolism.ethylene.synthesis-degradation.1-aminocyclopropane-1-carboxylate synthase'	class I/classII (InterPro:IPR004839)
Medtr0024s0080	'17.5.2'	'hormone metabolism.ethylene.signal transduction'	plant (InterPro:IPR004158)
Medtr1g043350	'17.5.2'	'hormone metabolism.ethylene.signal transduction'	ATERF-2
Medtr1g048610	'17.5.2'	'hormone metabolism.ethylene.signal transduction'	ATERF-2
Medtr1g074370	'17.5.2'	'hormone metabolism.ethylene.signal transduction'	ATERF-2
Medtr2g014300	'17.5.2'	'hormone metabolism.ethylene.signal transduction'	ATERF-4
Medtr2g078680	'17.5.2'	'hormone metabolism.ethylene.signal transduction'	integrase-type (InterPro:IPR016177)
Medtr3g079390	'17.5.2'	'hormone metabolism.ethylene.signal transduction'	plant & (at4g31980 : 218.0) unknown protein; CONTAINS InterPro DOMAIN/s: Protein of unknown function DUF247
Medtr4g008530	'17.5.2'	'hormone metabolism.ethylene.signal transduction'	eukaryotic (InterPro:IPR008580); BEST Arabidopsis thaliana protein match is: PPPDE putative thiol peptidase family protein (TAIR:AT5G25170.1); Has 30201 Blast hits to 17322 proteins in 780 species: Archae - 12; Bacteria - 1396; Metazoa - 17338; Fungi - 3422; Plants - 5037; Viruses - 0; Other Eukaryotes - 2996 (source: NCBI BLink). & (gnl|cdd|35545 : 234.0) no description available & (gnl|cdd|6942…
Medtr4g095700	'17.5.2'	'hormone metabolism.ethylene.signal transduction'	leaf whorl
Medtr4g100420	'17.5.2'	'hormone metabolism.ethylene.signal transduction'	ATERF-2
Medtr4g100450	'17.5.2'	'hormone metabolism.ethylene.signal transduction'	ATERF-2
Medtr5g015810	'17.5.2'	'hormone metabolism.ethylene.signal transduction'	leaf whorl
Medtr6g011050	'17.5.2'	'hormone metabolism.ethylene.signal transduction'	plant (InterPro:IPR004158)
Medtr6g011060	'17.5.2'	'hormone metabolism.ethylene.signal transduction'	plant (InterPro:IPR004158)
Medtr1g087200	'17.5.3'	'hormone metabolism.ethylene.induced-regulated-responsive-activated'	Rossmann-like alpha/beta/alpha sandwich fold (InterPro:IPR014729)
Medtr2g011070	'17.5.3'	'hormone metabolism.ethylene.induced-regulated-responsive-activated'	sequence-specific DNA binding transcription factor activity; EXPRESSED IN: 22 plant structures; EXPRESSED DURING: 13 growth stages; BEST Arabidopsis thaliana protein match is: basic helix-loop-helix (bHLH) DNA-binding superfamily protein (TAIR:AT3G20640.1). & (reliability: 342.0) & (original description: no original description)'
Medtr2g081820	'17.5.3'	'hormone metabolism.ethylene.induced-regulated-responsive-activated'	chloroplast; CONTAINS InterPro DOMAIN/s: Helix-loop-helix DNA-binding domain (InterPro:IPR001092)
Medtr3g467550	'17.5.3'	'hormone metabolism.ethylene.induced-regulated-responsive-activated'	ATP-dependent helicase activity
Medtr4g012860	'17.5.3'	'hormone metabolism.ethylene.induced-regulated-responsive-activated'	which prevented a specific localisation.; pyridoxine biosynthesis 1.2 (PDX1.2); FUNCTIONS IN: protein heterodimerization activity; INVOLVED IN: pyridoxal phosphate biosynthetic process
Medtr8g466800	'17.5.3'	'hormone metabolism.ethylene.induced-regulated-responsive-activated'	chloroplast; CONTAINS InterPro DOMAIN/s: Helix-loop-helix DNA-binding domain (InterPro:IPR001092)
Medtr7g011663	'17.6.1.1'	'hormone metabolism.gibberelin.synthesis-degradation.copalyl diphosphate synthase'	chloroplast precursor (EC 5.5.1.13) (Ent-copalyl diphosphate synthase) (KSA) - Pisum sativum (Garden pea) & (at4g02780 : 832.0) Catalyzes the conversion of geranylgeranyl pyrophosphate (GGPP) to copalyl pyrophosphate (CPP) of gibberellin biosynthesis; GA REQUIRING 1 (GA1); CONTAINS InterPro DOMAIN/s: Terpene synthase
Medtr1g102070	'17.6.1.11'	'hormone metabolism.gibberelin.synthesis-degradation.GA20 oxidase'	Oxoglutarate/iron-dependent oxygenase (InterPro:IPR005123); BEST Arabidopsis thaliana protein match is: gibberellin 20 oxidase 2 (TAIR:AT5G51810.1); Has 8544 Blast hits to 8501 proteins in 990 species: Archae - 0; Bacteria - 1084; Metazoa - 124; Fungi - 981; Plants - 4942; Viruses - 0; Other Eukaryotes - 1413 (source: NCBI BLink). & (o04705|gao1d_wheat : 504.0) Gibberellin 20 oxidase 1-D (EC 1.14…
Medtr2g102570	'17.6.1.12'	'hormone metabolism.gibberelin.synthesis-degradation.GA3 oxidase'	ap1-1 background. Deletion of 208 bp from -1016 to -809 (&#916;-808) resulted in loss of GA-negative feedback (this sequence
Medtr4g123020	'17.6.1.13'	'hormone metabolism.gibberelin.synthesis-degradation.GA2 oxidase'	leaf primordium
Medtr2g064295	'17.6.1.2'	'hormone metabolism.gibberelin.synthesis-degradation.ent-kaurene synthase'	chloroplast precursor (EC 4.2.3.19) (KSB) - Cucurbita maxima (Pumpkin) (Winter squash) & (at1g79460 : 809.0) Encodes for a protein with ent-kaurene synthase B activity which catalyzes the second step in the cyclization of GGPP to ent-kaurene in the gibberellins biosynthetic pathway.; GA REQUIRING 2 (GA2); FUNCTIONS IN: ent-kaurene synthase activity; INVOLVED IN: gibberellin biosynthetic process
Medtr2g105360	'17.6.1.3'	'hormone metabolism.gibberelin.synthesis-degradation.ent-kaurene oxidase'	gibberellic acid mediated signaling pathway
Medtr2g031930	'17.6.1.4'	'hormone metabolism.gibberelin.synthesis-degradation.ent-kaurenoic acid hydroxylase/oxygenase'	a member of the CYP88A cytochrome p450 family.; "cytochrome P450
Medtr8g012970	'17.6.1.4'	'hormone metabolism.gibberelin.synthesis-degradation.ent-kaurenoic acid hydroxylase/oxygenase'	B-class (InterPro:IPR002397)
Medtr8g089800	'17.6.1.4'	'hormone metabolism.gibberelin.synthesis-degradation.ent-kaurenoic acid hydroxylase/oxygenase'	B-class (InterPro:IPR002397)
Medtr1g082210	'17.6.2'	'hormone metabolism.gibberelin.signal transduction'	showing higher affinity to GA4. Interacts with DELLA proteins in vivo in the presence of GA4.; GA INSENSITIVE DWARF1C (GID1C); FUNCTIONS IN: hydrolase activity; INVOLVED IN: floral organ morphogenesis
Medtr3g065080	'17.6.2'	'hormone metabolism.gibberelin.signal transduction'	binding; INVOLVED IN: response to chitin; LOCATED IN: ubiquitin ligase complex; EXPRESSED IN: 14 plant structures; EXPRESSED DURING: 7 growth stages; CONTAINS InterPro DOMAIN/s: U box domain (InterPro:IPR003613)
Medtr4g122240	'17.6.2'	'hormone metabolism.gibberelin.signal transduction'	a putative nuclear localization signal
Medtr1g096370	'17.6.3'	'hormone metabolism.gibberelin.induced-regulated-responsive-activated'	T
Medtr7g010580	'17.6.3'	'hormone metabolism.gibberelin.induced-regulated-responsive-activated'	gibberellic acid mediated signaling pathway; EXPRESSED IN: 23 plant structures; EXPRESSED DURING: 14 growth stages; CONTAINS InterPro DOMAIN/s: Gibberellin regulated protein (InterPro:IPR003854); BEST Arabidopsis thaliana protein match is: Gibberellin-regulated family protein (TAIR:AT1G74670.1); Has 474 Blast hits to 474 proteins in 44 species: Archae - 0; Bacteria - 0; Metazoa - 0; Fungi - 0; Pl…
Medtr7g090590	'17.6.3'	'hormone metabolism.gibberelin.induced-regulated-responsive-activated'	T
Medtr1g022455	'17.7.1.10'	'hormone metabolism.jasmonate.synthesis-degradation.jasmonate-O-methyltransferase'	T
Medtr1g104650	'17.7.1.2'	'hormone metabolism.jasmonate.synthesis-degradation.lipoxygenase'	C-terminal & (at3g22400 : 1241.0) LOX5; FUNCTIONS IN: oxidoreductase activity
Medtr3g081130	'17.7.1.2'	'hormone metabolism.jasmonate.synthesis-degradation.lipoxygenase'	C-terminal & (p27480|loxa_phavu : 1135.0) Lipoxygenase 1 (EC 1.13.11.12) - Phaseolus vulgaris (Kidney bean) (French bean) & (gnl|cdd|84680 : 1018.0) no description available & (at1g55020 : 926.0) lipoxygenase
Medtr3g479460	'17.7.1.2'	'hormone metabolism.jasmonate.synthesis-degradation.lipoxygenase'	chloroplast precursor (EC 1.13.11.12) - Oryza sativa (Rice) & (at3g45140 : 926.0) Chloroplast lipoxygenase required for wound-induced jasmonic acid accumulation in Arabidopsis.Mutants are resistant to Staphylococcus aureus and accumulate salicylic acid upon infection.; lipoxygenase 2 (LOX2); FUNCTIONS IN: lipoxygenase activity; INVOLVED IN: in 7 processes; LOCATED IN: chloroplast thylakoid membra…
Medtr4g066170	'17.7.1.2'	'hormone metabolism.jasmonate.synthesis-degradation.lipoxygenase'	chloroplast precursor (EC 1.13.11.12) (LOX2:Hv:3) - Hordeum vulgare (Barley) & (at3g45140 : 999.0) Chloroplast lipoxygenase required for wound-induced jasmonic acid accumulation in Arabidopsis.Mutants are resistant to Staphylococcus aureus and accumulate salicylic acid upon infection.; lipoxygenase 2 (LOX2); FUNCTIONS IN: lipoxygenase activity; INVOLVED IN: in 7 processes; LOCATED IN: chloroplast…
Medtr8g018430	'17.7.1.2'	'hormone metabolism.jasmonate.synthesis-degradation.lipoxygenase'	C-terminal & (p09186|lox3_soybn : 1277.0) Seed lipoxygenase-3 (EC 1.13.11.12) (L-3) - Glycine max (Soybean) & (gnl|cdd|84680 : 1049.0) no description available & (at1g55020 : 982.0) lipoxygenase
Medtr8g018450	'17.7.1.2'	'hormone metabolism.jasmonate.synthesis-degradation.lipoxygenase'	a defense gene conferring resistance Xanthomonas campestris; lipoxygenase 1 (LOX1); CONTAINS InterPro DOMAIN/s: Lipoxygenase
Medtr8g018550	'17.7.1.2'	'hormone metabolism.jasmonate.synthesis-degradation.lipoxygenase'	C-terminal & (p09186|lox3_soybn : 1292.0) Seed lipoxygenase-3 (EC 1.13.11.12) (L-3) - Glycine max (Soybean) & (gnl|cdd|84680 : 1069.0) no description available & (at3g22400 : 966.0) LOX5; FUNCTIONS IN: oxidoreductase activity
Medtr8g018690	'17.7.1.2'	'hormone metabolism.jasmonate.synthesis-degradation.lipoxygenase'	C-terminal & (p09918|lox3_pea : 1229.0) Seed lipoxygenase-3 (EC 1.13.11.12) - Pisum sativum (Garden pea) & (gnl|cdd|84680 : 1031.0) no description available & (at3g22400 : 923.0) LOX5; FUNCTIONS IN: oxidoreductase activity
Medtr8g018735	'17.7.1.2'	'hormone metabolism.jasmonate.synthesis-degradation.lipoxygenase'	a defense gene conferring resistance Xanthomonas campestris; lipoxygenase 1 (LOX1); CONTAINS InterPro DOMAIN/s: Lipoxygenase
Medtr8g080230	'17.7.1.2'	'hormone metabolism.jasmonate.synthesis-degradation.lipoxygenase'	acting on single donors with incorporation of molecular oxygen
Medtr5g053950	'17.7.1.4'	'hormone metabolism.jasmonate.synthesis-degradation.allene oxidase cyclase'	which catalyzes an essential step in jasmonic acid biosynthesis. Gene expression is reduced during senescence
Medtr7g417750	'17.7.1.4'	'hormone metabolism.jasmonate.synthesis-degradation.allene oxidase cyclase'	which catalyzes an essential step in jasmonic acid biosynthesis. Gene expression is reduced during senescence
Medtr4g125470	'17.7.1.5'	'hormone metabolism.jasmonate.synthesis-degradation.12-Oxo-PDA-reductase'	4
Medtr5g006720	'17.7.1.5'	'hormone metabolism.jasmonate.synthesis-degradation.12-Oxo-PDA-reductase'	it shows very little activity with the naturally occurring OPDA isomer. Shows activity towards 2
Medtr5g006740	'17.7.1.5'	'hormone metabolism.jasmonate.synthesis-degradation.12-Oxo-PDA-reductase'	it shows very little activity with the naturally occurring OPDA isomer. Shows activity towards 2
Medtr5g006750	'17.7.1.5'	'hormone metabolism.jasmonate.synthesis-degradation.12-Oxo-PDA-reductase'	it shows very little activity with the naturally occurring OPDA isomer. Shows activity towards 2
Medtr5g006800	'17.7.1.5'	'hormone metabolism.jasmonate.synthesis-degradation.12-Oxo-PDA-reductase'	it shows very little activity with the naturally occurring OPDA isomer. Shows activity towards 2
Medtr8g088560	'17.8.1.1.4'	'hormone metabolism.salicylic acid.synthesis-degradation.synthesis.SA glucosyltransferase ether bond making SAG'	benzoic acid
Medtr1g030750	'18'	'Co-factor and vitamine metabolism'	Nicotinate-nucleotide pyrophosphorylase (InterPro:IPR004393)
Medtr1g046250	'18'	'Co-factor and vitamine metabolism'	beta subunit family; FUNCTIONS IN: coenzyme F420 hydrogenase activity; INVOLVED IN: biological_process unknown; LOCATED IN: chloroplast; EXPRESSED IN: 22 plant structures; EXPRESSED DURING: 13 growth stages; CONTAINS InterPro DOMAIN/s: Coenzyme F420 hydrogenase/dehydrogenase beta subunit
Medtr1g106190	'18'	'Co-factor and vitamine metabolism'	located in mitochondria but not found in chloroplasts; lipoyltransferase 2 (LIP2); CONTAINS InterPro DOMAIN/s: Octanoyltransferase (InterPro:IPR000544)
Medtr2g017520	'18'	'Co-factor and vitamine metabolism'	protein heterodimerization activity; INVOLVED IN: in 12 processes; LOCATED IN: cytosol
Medtr4g015590	'18'	'Co-factor and vitamine metabolism'	conserved site (InterPro:IPR021196)
Medtr4g094805	'18'	'Co-factor and vitamine metabolism'	nicotinate nucleotide salvage; LOCATED IN: cellular_component unknown; EXPRESSED IN: 22 plant structures; EXPRESSED DURING: 13 growth stages; CONTAINS InterPro DOMAIN/s: Nicotinate phosphoribosyltransferase-related (InterPro:IPR007229)
Medtr2g035470	'18.1'	'Co-factor and vitamine metabolism.molybdenum cofactor'	Mo-molybdopterin cofactor sulfurase activity
Medtr2g073350	'18.12'	'Co-factor and vitamine metabolism.NADH kinase'	PpnK-type
Medtr1g046510	'18.2'	'Co-factor and vitamine metabolism.thiamine'	hydroxyethylthiazole kinase activity; INVOLVED IN: thiamin biosynthetic process; LOCATED IN: cellular_component unknown; EXPRESSED IN: 22 plant structures; EXPRESSED DURING: 13 growth stages; CONTAINS InterPro DOMAIN/s: Hydroxyethylthiazole kinase (InterPro:IPR000417)
Medtr1g046790	'18.2'	'Co-factor and vitamine metabolism.thiamine'	hydroxyethylthiazole kinase activity; INVOLVED IN: thiamin biosynthetic process; LOCATED IN: cellular_component unknown; EXPRESSED IN: 22 plant structures; EXPRESSED DURING: 13 growth stages; CONTAINS InterPro DOMAIN/s: Hydroxyethylthiazole kinase (InterPro:IPR000417)
Medtr1g105480	'18.2'	'Co-factor and vitamine metabolism.thiamine'	chloroplast precursor - Citrus sinensis (Sweet orange) & (at5g54770 : 514.0) Encodes a thiamine biosynthetic gene that has a dual function in thiamine biosynthesis and mitochondrial DNA damage tolerance. It appears to be involved in producing the thiazole portion of thiamine (vitamin B1). A crystal structure of the protein reveals that it forms a 2-ring homo-octamer.; THI1; FUNCTIONS IN: protein …
Medtr3g462950	'18.2'	'Co-factor and vitamine metabolism.thiamine'	T
Medtr3g462970	'18.2'	'Co-factor and vitamine metabolism.thiamine'	T
Medtr4g081130	'18.2'	'Co-factor and vitamine metabolism.thiamine'	zinc ion binding; INVOLVED IN: oxazole or thiazole biosynthetic process
Medtr1g076720	'18.4.5'	'Co-factor and vitamine metabolism.pantothenate.pantothenate kinase (PANK)'	Uncharacterised conserved protein UCP030210 (InterPro:IPR016949); BEST Arabidopsis thaliana protein match is: Uncharacterised conserved protein (UCP030210) (TAIR:AT4G35360.1); Has 357 Blast hits to 356 proteins in 130 species: Archae - 52; Bacteria - 55; Metazoa - 104; Fungi - 0; Plants - 135; Viruses - 0; Other Eukaryotes - 11 (source: NCBI BLink). & (gnl|cdd|39784 : 434.0) no description availa…
Medtr8g035610	'18.4.7'	'Co-factor and vitamine metabolism.pantothenate.phosphopantothenoylcysteine decarboxylase (PPCDC)'	T
Medtr5g020680	'18.4.8'	'Co-factor and vitamine metabolism.pantothenate.pantetheine-phosphate adenylyltransferase (PPAT)'	Cytidyltransferase-related (InterPro:IPR004821)
Medtr2g030240	'18.5.2.4'	'Co-factor and vitamine metabolism.folate & vitamine K.vitamine K.o-Succinyl-BenzoylCoa Synthetase'	conserved site (InterPro:IPR020845)
Medtr4g094100	'18.5.2.7'	'Co-factor and vitamine metabolism.folate & vitamine K.vitamine K.DHNA Phytyltransferase'	4-dihydroxy-2-naphthoic acid phytyltransferase involved in phylloquinone and plastoquinone biosynthesis. Mutants are pale green and heterotrophic with defects in photosynthetic electron transport.; ABERRANT CHLOROPLAST DEVELOPMENT 4 (ABC4); CONTAINS InterPro DOMAIN/s: UbiA prenyltransferase (InterPro:IPR000537)
Medtr5g033700	'18.5.2.8'	'Co-factor and vitamine metabolism.folate & vitamine K.vitamine K.2-phytyl-1	'(at1g23360 : 342.0) Encodes a 2-phytyl-1
Medtr8g069840	'18.5.2.8.1'	'Co-factor and vitamine metabolism.folate & vitamine K.vitamine K.2-phytyl-1	'(at1g68890 : 1771.0) Homologous to the four eubacterial men genes involved in menanoquinone biosynthesis. Studies of mutants defective in this gene demonstrated its involvement in phylloquinone biosynthesis in Arabidopsis.; magnesium ion binding;thiamin pyrophosphate binding;hydro-lyases;catalytics;2-succinyl-5-enolpyruvyl-6-hydroxy-3-cyclohexene-1-carboxylic-acid synthases; FUNCTIONS IN: 2-succ…
Medtr3g005730	'18.6'	'Co-factor and vitamine metabolism.biotin'	T
Medtr4g076870	'18.6.1'	'Co-factor and vitamine metabolism.biotin.biotin synthase'	Aldolase-type TIM barrel (InterPro:IPR013785)
Medtr4g104680	'18.7'	'Co-factor and vitamine metabolism.iron-sulphur clusters'	Quinolinate synthetase A (InterPro:IPR003473); BEST Arabidopsis thaliana protein match is: sulfur E2 (TAIR:AT1G67810.1); Has 1807 Blast hits to 1807 proteins in 277 species: Archae - 0; Bacteria - 0; Metazoa - 736; Fungi - 347; Plants - 385; Viruses - 0; Other Eukaryotes - 339 (source: NCBI BLink). & (gnl|cdd|82962 : 124.0) no description available & (reliability: 1908.0) & (original description:…
Medtr3g112310	'19'	'tetrapyrrole synthesis'	conserved site (InterPro:IPR018063)
Medtr3g048950	'19.1'	'tetrapyrrole synthesis.glu-tRNA synthetase'	carbon-nitrogen ligase activity
Medtr5g055940	'19.1'	'tetrapyrrole synthesis.glu-tRNA synthetase'	carbon-nitrogen ligase activity
Medtr2g015390	'19.10'	'tetrapyrrole synthesis.magnesium chelatase'	chloroplast precursor (EC 6.6.1.1) (Mg-protoporphyrin IX chelatase) - Glycine max (Soybean) & (gnl|cdd|79298 : 616.0) no description available & (at5g45930 : 572.0) encodes a second Chl I gene (CHLI2)
Medtr8g100120	'19.11'	'tetrapyrrole synthesis.magnesium protoporphyrin IX methyltransferase'	PSII (LHCII
Medtr7g088340	'19.12'	'tetrapyrrole synthesis.magnesium-protoporphyrin IX monomethyl ester (oxidative) cyclase'	stems and roots. Has a consensus carboxylate-bridged di-iron binding site.; COPPER RESPONSE DEFECT 1 (CRD1); FUNCTIONS IN: magnesium-protoporphyrin IX monomethyl ester (oxidative) cyclase activity
Medtr2g020160	'19.13'	'tetrapyrrole synthesis.divinyl chlorophyllide-a 8-vinyl-reductase'	8-divinyl protochlorophyllide a 8-vinyl reductase activity. Mutants accumulate divinyl chlorophyll rather than monovinyl chlorophyll.; PALE-GREEN AND CHLOROPHYLL B REDUCED 2 (PCB2); FUNCTIONS IN: 3
Medtr2g079710	'19.14'	'tetrapyrrole synthesis.protochlorophyllide reductase'	chloroplast precursor (EC 1.3.1.33) (PCR) (NADPH-protochlorophyllide oxidoreductase) (POR) - Pisum sativum (Garden pea) & (at5g54190 : 577.0) light-dependent NADPH:protochlorophyllide oxidoreductase A; protochlorophyllide oxidoreductase A (PORA); FUNCTIONS IN: oxidoreductase activity
Medtr7g069210	'19.15'	'tetrapyrrole synthesis.chlorophyll synthase'	the last step of chlorophyll biosynthesis. Although it can use either geranylgeranyl pyrophosphate (GGPP) or phytyl pyrophosphate (PhyPP) as substrates
Medtr4g092820	'19.2'	'tetrapyrrole synthesis.glu-tRNA reductase'	chloroplast precursor (EC 1.2.1.70) (GluTR) - Cucumis sativus (Cucumber) & (at1g58290 : 589.0) Encodes a protein with glutamyl-tRNA reductase (GluTR) activity
Medtr5g067410	'19.2'	'tetrapyrrole synthesis.glu-tRNA reductase'	chloroplast precursor (EC 1.2.1.70) (GluTR) - Cucumis sativus (Cucumber) & (at1g58290 : 701.0) Encodes a protein with glutamyl-tRNA reductase (GluTR) activity
Medtr8g095320	'19.20'	'tetrapyrrole synthesis.ferrochelatase'	chloroplast precursor (EC 4.99.1.1) (Ferrochelatase II) (Protoheme ferro-lyase 2) (Heme synthetase 2) - Oryza sativa (Rice) & (at2g30390 : 740.0) Encodes one of two ferrochelatase genes in Arabidopsis. Ferrochelatase is the terminal enzyme of heme biosynthesis. FC-II is speculated to operate in photosynthetic cytochromes; ferrochelatase 2 (FC2); FUNCTIONS IN: ferrochelatase activity; INVOLVED IN:…
Medtr7g034345	'19.30'	'tetrapyrrole synthesis.uroporphyrin-III C-methyltransferase'	Tetrapyrrole methylase
Medtr3g088610	'19.4'	'tetrapyrrole synthesis.ALA dehydratase'	chloroplast precursor (EC 4.2.1.24) (Porphobilinogen synthase) (ALADH) (Fragment) - Pisum sativum (Garden pea) & (at1g69740 : 500.0) Encodes a putative 5-aminolevulinate dehydratase involved in chlorophyll biosynthesis.; HEMB1; FUNCTIONS IN: porphobilinogen synthase activity
Medtr4g067150	'19.40'	'tetrapyrrole synthesis.regulation'	genomes uncoupled
Medtr8g022040	'19.40'	'tetrapyrrole synthesis.regulation'	TPR domain containing protein that is localized to the chloroplast membrane and is involved in chlorophyll biosynthesis. Mutants accumulate protochlorophyllide
Medtr3g075110	'19.8'	'tetrapyrrole synthesis.coproporphyrinogen III oxidase'	iron-sulfur cluster binding
Medtr5g098800	'19.8'	'tetrapyrrole synthesis.coproporphyrinogen III oxidase'	chloroplast precursor (EC 1.3.3.3) (Coproporphyrinogenase) (Coprogen oxidase) - Glycine max (Soybean) & (at1g03475 : 595.0) Encodes coproporphyrinogen III oxidase
Medtr1g041390	'19.99'	'tetrapyrrole synthesis.unspecified'	the first enzyme in chlorophyll degradation. It catalyzes the hydrolysis of the ester bond to chlorophyllide and phytol. AtCLH2 has a typical signal sequence for the chloroplast. Gene expression does not respond to methyljasmonate
Medtr5g091340	'2.1.1.1'	'major CHO metabolism.synthesis.sucrose.SPS'	transferase activity
Medtr6g035305	'2.1.1.3'	'major CHO metabolism.synthesis.sucrose.FBPase'	6-bisphosphatase
Medtr3g082150	'2.1.2.1'	'major CHO metabolism.synthesis.starch.AGPase'	chloroplast precursor (EC 2.7.7.27) (ADP-glucose synthase) (ADP-glucose pyrophosphorylase) (AGPase B) (Alpha-D-glucose-1-phosphate adenyl transferase) - Vicia faba (Broad bean) & (at5g48300 : 878.0) Encodes the small subunit of ADP-glucose pyrophosphorylase. The small subunit is the catalytic isoform responsible for ADP-glucose pyrophosphorylase activity. The presence of the small subunit is requ…
Medtr3g116860	'2.1.2.1'	'major CHO metabolism.synthesis.starch.AGPase'	rate limiting step in starch biosynthesis. The large subunit plays a regulatory role whereas the small subunit (ApS) is the catalytic isoform. Four isoforms (ApL1-4) have been identified. ApL3 is the major large subunit isoform present in inflorescences
Medtr4g070430	'2.1.2.1'	'major CHO metabolism.synthesis.starch.AGPase'	rate limiting step in starch biosynthesis. The large subunit plays a regulatory role whereas the small subunit (ApS) is the catalytic isoform. Four isoforms (ApL1-4) have been identified. ApL3 is the major large subunit isoform present in inflorescences
Medtr4g131760	'2.1.2.1'	'major CHO metabolism.synthesis.starch.AGPase'	rate limiting step in starch biosynthesis. The large subunit plays a regulatory role whereas the small subunit (ApS) is the catalytic isoform. Four isoforms (ApL1-4) have been identified. ApL1 is the major large subunit isoform present in leaves. Mutational analysis of APS1 suggests that APL1 and APL2 can compensate for loss of APS1 catalytic activity
Medtr5g097010	'2.1.2.1'	'major CHO metabolism.synthesis.starch.AGPase'	chloroplast precursor (EC 2.7.7.27) (ADP-glucose synthase) (ADP-glucose pyrophosphorylase) (AGPase B) (Alpha-D-glucose-1-phosphate adenyl transferase) - Vicia faba (Broad bean) & (at5g48300 : 872.0) Encodes the small subunit of ADP-glucose pyrophosphorylase. The small subunit is the catalytic isoform responsible for ADP-glucose pyrophosphorylase activity. The presence of the small subunit is requ…
Medtr6g008840	'2.1.2.1'	'major CHO metabolism.synthesis.starch.AGPase'	nucleotidyltransferase activity; INVOLVED IN: response to cadmium ion
Medtr1g078000	'2.1.2.2'	'major CHO metabolism.synthesis.starch.starch synthase'	chloroplast precursor (EC 2.4.1.242) (Granule-bound starch synthase I) (GBSS-I) - Pisum sativum (Garden pea) & (at1g32900 : 862.0) UDP-Glycosyltransferase superfamily protein; FUNCTIONS IN: protein binding
Medtr2g023320	'2.1.2.2'	'major CHO metabolism.synthesis.starch.starch synthase'	chloroplast precursor (EC 2.4.1.21) (SS III) (Soluble starch synthase III) - Solanum tuberosum (Potato) & (at1g11720 : 1408.0) Encodes a starch synthase that in addition to its role in starch biosynthesis also has a negative regulatory function in the biosynthesis of transient starch. The protein apparently contains a starch-binding domain (SBD).; starch synthase 3 (SS3); CONTAINS InterPro DOMAIN…
Medtr3g091570	'2.1.2.2'	'major CHO metabolism.synthesis.starch.starch synthase'	transferring glycosyl groups
Medtr4g094595	'2.1.2.2'	'major CHO metabolism.synthesis.starch.starch synthase'	transferring glycosyl groups; INVOLVED IN: starch metabolic process; LOCATED IN: chloroplast; EXPRESSED IN: 24 plant structures; EXPRESSED DURING: 13 growth stages; CONTAINS InterPro DOMAIN/s: Glycogen/starch synthases
Medtr5g030600	'2.1.2.2'	'major CHO metabolism.synthesis.starch.starch synthase'	catalytic domain (InterPro:IPR013534); BEST Arabidopsis thaliana protein match is: starch synthase 4 (TAIR:AT4G18240.1). & (gnl|cdd|80717 : 278.0) no description available & (q43846|ssy3_soltu : 190.0) Soluble starch synthase 3
Medtr3g053220	'2.1.2.3'	'major CHO metabolism.synthesis.starch.starch branching'	catalytic activity
Medtr3g115340	'2.1.2.3'	'major CHO metabolism.synthesis.starch.starch branching'	4-alpha-glucan branching enzyme (EC 2.4.1.18) (Starch branching enzyme) (Q-enzyme) - Solanum tuberosum (Potato) & (at5g03650 : 799.0) Encodes starch branching enzyme (E.C.2.4.1.18) similar to SBE2 from maize and rice. Expressed throughout the plant and highest in seedlings and cauline leaves.; starch branching enzyme 2.2 (SBE2.2); FUNCTIONS IN: 1
Medtr7g104080	'2.1.2.3'	'major CHO metabolism.synthesis.starch.starch branching'	4-alpha-glucan branching enzyme activity; INVOLVED IN: amylopectin biosynthetic process
Medtr8g101490	'2.1.2.4'	'major CHO metabolism.synthesis.starch.debranching'	alpha-amylase activity; INVOLVED IN: carbohydrate metabolic process
Medtr5g044990	'2.2.1.1'	'major CHO metabolism.degradation.sucrose.fructokinase'	AT1G69200/FLN2)
Medtr3g117710	'2.2.1.3.1'	'major CHO metabolism.degradation.sucrose.invertases.neutral'	beta-fructofuranosidase activity; LOCATED IN: cytosol; EXPRESSED IN: 20 plant structures; EXPRESSED DURING: 11 growth stages; CONTAINS InterPro DOMAIN/s: Plant neutral invertase (InterPro:IPR006937)
Medtr1g015940	'2.2.1.3.2'	'major CHO metabolism.degradation.sucrose.invertases.cell wall'	family 32 (InterPro:IPR001362)
Medtr1g015970	'2.2.1.3.2'	'major CHO metabolism.degradation.sucrose.invertases.cell wall'	family 32 (InterPro:IPR001362)
Medtr1g026170	'2.2.2.1.1'	'major CHO metabolism.degradation.starch.starch cleavage.alpha amylase'	putative / 1
Medtr8g468990	'2.2.2.1.1'	'major CHO metabolism.degradation.starch.starch cleavage.alpha amylase'	starch catabolic process; LOCATED IN: chloroplast stroma
Medtr2g089030	'2.2.2.1.2'	'major CHO metabolism.degradation.starch.starch cleavage.beta amylase'	4-alpha-D-glucan maltohydrolase) - Glycine max (Soybean) & (at2g32290 : 696.0) beta-amylase 6 (BAM6); FUNCTIONS IN: cation binding
Medtr4g045667	'2.2.2.1.2'	'major CHO metabolism.degradation.starch.starch cleavage.beta amylase'	4-alpha-D-glucan maltohydrolase) - Medicago sativa (Alfalfa) & (at4g15210 : 749.0) cytosolic beta-amylase expressed in rosette leaves and inducible by sugar. RAM1 mutants have reduced beta amylase in leaves and stems.; ARABIDOPSIS THALIANA BETA-AMYLASE (ATBETA-AMY); FUNCTIONS IN: beta-amylase activity; INVOLVED IN: response to herbivore
Medtr5g013620	'2.2.2.1.2'	'major CHO metabolism.degradation.starch.starch cleavage.beta amylase'	the sugar content of the RNAi lines were similar to wildtype (glucose and sucrose unaffected).; chloroplast beta-amylase (CT-BMY); CONTAINS InterPro DOMAIN/s: Glycoside hydrolase
Medtr5g013640	'2.2.2.1.2'	'major CHO metabolism.degradation.starch.starch cleavage.beta amylase'	the sugar content of the RNAi lines were similar to wildtype (glucose and sucrose unaffected).; chloroplast beta-amylase (CT-BMY); CONTAINS InterPro DOMAIN/s: Glycoside hydrolase
Medtr1g090867	'2.2.2.10'	'major CHO metabolism.degradation.starch.laforin like phosphoglucan phosphatase (SEX4)'	polysaccharide binding; INVOLVED IN: protein amino acid dephosphorylation
Medtr0288s0040	'2.2.2.2'	'major CHO metabolism.degradation.starch.starch phosphorylase'	4 glucan phosphorylase L isozyme
Medtr3g462340	'2.2.2.2'	'major CHO metabolism.degradation.starch.starch phosphorylase'	H isozyme (EC 2.4.1.1) (Starch phosphorylase H) - Vicia faba (Broad bean) & (ipr000811 : 1500.0) Glycosyl transferase
Medtr4g082950	'2.2.2.2'	'major CHO metabolism.degradation.starch.starch phosphorylase'	4 glucan phosphorylase L-2 isozyme
Medtr6g093240	'2.2.2.3'	'major CHO metabolism.degradation.starch.glucan water dikinase'	water dikinase (PWD) which is required for normal degradation of leaf starch in Arabidopsis. NMR analysis of the mutants
Medtr8g069760	'2.2.2.3'	'major CHO metabolism.degradation.starch.glucan water dikinase'	chloroplast precursor (EC 2.7.9.4) (EC 2.7.13.3) (Starch-related R1 protein) - Solanum tuberosum (Potato) & (at1g10760 : 1721.0) Encodes an &#945;-glucan
Medtr3g094840	'2.2.2.4'	'major CHO metabolism.degradation.starch.D enzyme'	4-glucanotransferase activity. Mutant has altered starch degradation.; disproportionating enzyme (DPE1); FUNCTIONS IN: 4-alpha-glucanotransferase activity
Medtr7g088740	'2.2.2.4'	'major CHO metabolism.degradation.starch.D enzyme'	mannose and xylose as acceptors. Fucose and galactose can also act as acceptors but less efficiently than the previous three. It was also was also recently reported to act on maltodextrins. On the other hand
Medtr0172s0020	'2.2.2.6'	'major CHO metabolism.degradation.starch.transporter'	with maltose levels at least 40 times higher than that of wild-type. This gene encodes a protein located in the chloroplast envelope.; ROOT CAP 1 (RCP1); FUNCTIONS IN: maltose transmembrane transporter activity; INVOLVED IN: in 7 processes; LOCATED IN: chloroplast inner membrane
Medtr4g088350	'2.2.2.6'	'major CHO metabolism.degradation.starch.transporter'	chloroplast precursor (cTPT) (p36) (E30) - Pisum sativum (Garden pea) & (at5g46110 : 432.0) mutant has Altered acclimation responses; Chloroplast Triose Phosphate Translocator; ACCLIMATION OF PHOTOSYNTHESIS TO ENVIRONMENT 2 (APE2); FUNCTIONS IN: antiporter activity; INVOLVED IN: transport; LOCATED IN: chloroplast
Medtr5g044220	'2.2.2.6'	'major CHO metabolism.degradation.starch.transporter'	chloroplast precursor (cTPT) (p36) (E29) - Spinacia oleracea (Spinach) & (at5g46110 : 437.0) mutant has Altered acclimation responses; Chloroplast Triose Phosphate Translocator; ACCLIMATION OF PHOTOSYNTHESIS TO ENVIRONMENT 2 (APE2); FUNCTIONS IN: antiporter activity; INVOLVED IN: transport; LOCATED IN: chloroplast
Medtr3g099500	'2.2.2.8'	'major CHO metabolism.degradation.starch.ISA3'	the chloroplastic &#945;-amylase AMY3 is upregulated.; isoamylase 3 (ISA3); FUNCTIONS IN: isoamylase activity
Medtr1g090693	'2.2.2.9'	'major CHO metabolism.degradation.starch.limit dextrinase/ pullulanase'	6 linkages during starch degradation in seed endosperm. However
Medtr1g107490	'20'	'stress'	T
Medtr3g072040	'20'	'stress'	cultured cell; EXPRESSED DURING: M germinated pollen stage; CONTAINS InterPro DOMAIN/s: Protein of unknown function Cys-rich (InterPro:IPR006461)
Medtr4g117020	'20'	'stress'	ATP binding site (InterPro:IPR017441)
Medtr4g117030	'20'	'stress'	PAN-2 domain (InterPro:IPR013227)
Medtr8g041670	'20'	'stress'	ATP binding site (InterPro:IPR017441)
Medtr0003s0090	'20.1'	'stress.biotic'	putative; FUNCTIONS IN: transmembrane receptor activity
Medtr0006s0080	'20.1'	'stress.biotic'	nucleotide binding
Medtr0007s0060	'20.1'	'stress.biotic'	ATP binding; INVOLVED IN: signal transduction
Medtr0007s0080	'20.1'	'stress.biotic'	ATP binding; INVOLVED IN: signal transduction
Medtr0038s0080	'20.1'	'stress.biotic'	putative; FUNCTIONS IN: transmembrane receptor activity
Medtr0069s0040	'20.1'	'stress.biotic'	nucleotide binding
Medtr0070s0070	'20.1'	'stress.biotic'	defense response; LOCATED IN: endomembrane system; CONTAINS InterPro DOMAIN/s: Leucine-rich repeat-containing N-terminal domain
Medtr0087s0030	'20.1'	'stress.biotic'	defense response to fungus
Medtr0095s0020	'20.1'	'stress.biotic'	another disease resistance signaling protein. Expressed at elevated level in response to green peach aphid (GPA) feeding
Medtr0349s0020	'20.1'	'stress.biotic'	ATP binding; INVOLVED IN: signal transduction
Medtr0391s0020	'20.1'	'stress.biotic'	defense response; CONTAINS InterPro DOMAIN/s: NB-ARC (InterPro:IPR002182)
Medtr0864s0020	'20.1'	'stress.biotic'	and to the toll and interleukin-1 receptors. Confers resistance to Peronospora parasitica.; RECOGNITION OF PERONOSPORA PARASITICA 5 (RPP5); FUNCTIONS IN: nucleotide binding; INVOLVED IN: defense response to fungus
Medtr1g021100	'20.1'	'stress.biotic'	defense response; LOCATED IN: apoplast; EXPRESSED IN: 22 plant structures; EXPRESSED DURING: 13 growth stages; CONTAINS InterPro DOMAIN/s: NB-ARC (InterPro:IPR002182)
Medtr1g025420	'20.1'	'stress.biotic'	conserved site (InterPro:IPR017949)
Medtr1g031830	'20.1'	'stress.biotic'	apoptosis; CONTAINS InterPro DOMAIN/s: NB-ARC (InterPro:IPR002182)
Medtr1g040175	'20.1'	'stress.biotic'	transferring acyl groups other than amino-acyl groups; INVOLVED IN: biological_process unknown; LOCATED IN: cellular_component unknown; EXPRESSED IN: 9 plant structures; EXPRESSED DURING: 4 anthesis
Medtr1g040195	'20.1'	'stress.biotic'	transferring acyl groups other than amino-acyl groups; INVOLVED IN: biological_process unknown; LOCATED IN: cellular_component unknown; EXPRESSED IN: 9 plant structures; EXPRESSED DURING: 4 anthesis
Medtr1g040215	'20.1'	'stress.biotic'	transferring acyl groups other than amino-acyl groups; INVOLVED IN: biological_process unknown; LOCATED IN: cellular_component unknown; EXPRESSED IN: 9 plant structures; EXPRESSED DURING: 4 anthesis
Medtr1g041550	'20.1'	'stress.biotic'	nucleotide binding
Medtr1g051585	'20.1'	'stress.biotic'	nucleotide binding
Medtr1g054525	'20.1'	'stress.biotic'	lignan biosynthetic process
Medtr1g063960	'20.1'	'stress.biotic'	putative; FUNCTIONS IN: transmembrane receptor activity
Medtr1g076400	'20.1'	'stress.biotic'	binding; INVOLVED IN: protein ubiquitination; LOCATED IN: plasma membrane; EXPRESSED IN: 23 plant structures; EXPRESSED DURING: 13 growth stages; CONTAINS InterPro DOMAIN/s: U box domain (InterPro:IPR003613)
Medtr1g090370	'20.1'	'stress.biotic'	et al. (1997).; TGACG motif-binding factor 4 (TGA4); CONTAINS InterPro DOMAIN/s: Basic-leucine zipper (bZIP) transcription factor (InterPro:IPR004827)
Medtr1g090673	'20.1'	'stress.biotic'	apoptosis; LOCATED IN: plasma membrane; EXPRESSED IN: 21 plant structures; EXPRESSED DURING: 10 growth stages; CONTAINS InterPro DOMAIN/s: NB-ARC (InterPro:IPR002182)
Medtr1g090680	'20.1'	'stress.biotic'	apoptosis; LOCATED IN: plasma membrane; EXPRESSED IN: cultured cell; CONTAINS InterPro DOMAIN/s: NB-ARC (InterPro:IPR002182)
Medtr1g090690	'20.1'	'stress.biotic'	Peronospora parasitica. Encodes an NBS-LRR type R protein with a putative amino-terminal leucine zipper. Fungal protein ATR13 induces RPP13 gene expression and disease resistance.; RECOGNITION OF PERONOSPORA PARASITICA 13 (RPP13); FUNCTIONS IN: ATP binding; INVOLVED IN: defense response
Medtr2g010600	'20.1'	'stress.biotic'	Antigen 5
Medtr2g010610	'20.1'	'stress.biotic'	encodes a basic PR1-like protein. Expresses in flowers
Medtr2g012370	'20.1'	'stress.biotic'	Antigen 5
Medtr2g016590	'20.1'	'stress.biotic'	with more than 85% a.a. identity. It has a broad expression pattern and is involved in vascular strand development in the leaf
Medtr2g034680	'20.1'	'stress.biotic'	LP.10 ten leaves visible
Medtr2g037150	'20.1'	'stress.biotic'	nucleoside-triphosphatase activity
Medtr2g038510	'20.1'	'stress.biotic'	defense response; LOCATED IN: cellular_component unknown; EXPRESSED IN: shoot; CONTAINS InterPro DOMAIN/s: NB-ARC (InterPro:IPR002182)
Medtr2g039770	'20.1'	'stress.biotic'	putative; FUNCTIONS IN: transmembrane receptor activity
Medtr2g041070	'20.1'	'stress.biotic'	putative; FUNCTIONS IN: transmembrane receptor activity
Medtr2g044830	'20.1'	'stress.biotic'	putative; FUNCTIONS IN: transmembrane receptor activity
Medtr2g062360	'20.1'	'stress.biotic'	defense response; CONTAINS InterPro DOMAIN/s: NB-ARC (InterPro:IPR002182)
Medtr2g071820	'20.1'	'stress.biotic'	nucleotide binding
Medtr2g078260	'20.1'	'stress.biotic'	defense response; LOCATED IN: endomembrane system; EXPRESSED IN: 7 plant structures; EXPRESSED DURING: 9 growth stages; CONTAINS InterPro DOMAIN/s: Leucine-rich repeat
Medtr2g082990	'20.1'	'stress.biotic'	group 2 (InterPro:IPR004864); BEST Arabidopsis thaliana protein match is: Late embryogenesis abundant (LEA) hydroxyproline-rich glycoprotein family (TAIR:AT3G20590.1); Has 471 Blast hits to 471 proteins in 25 species: Archae - 0; Bacteria - 0; Metazoa - 0; Fungi - 0; Plants - 471; Viruses - 0; Other Eukaryotes - 0 (source: NCBI BLink). & (reliability: 254.0) & (original description: no original d…
Medtr2g086790	'20.1'	'stress.biotic'	group 2 (InterPro:IPR004864); BEST Arabidopsis thaliana protein match is: Late embryogenesis abundant (LEA) hydroxyproline-rich glycoprotein family (TAIR:AT5G22200.1); Has 838 Blast hits to 838 proteins in 28 species: Archae - 0; Bacteria - 0; Metazoa - 0; Fungi - 0; Plants - 838; Viruses - 0; Other Eukaryotes - 0 (source: NCBI BLink). & (gnl|cdd|70773 : 139.0) no description available & (reliabi…
Medtr2g099450	'20.1'	'stress.biotic'	but not in endosperm and integuments as in carrot. Post-embryonically
Medtr2g099465	'20.1'	'stress.biotic'	but not in endosperm and integuments as in carrot. Post-embryonically
Medtr2g450830	'20.1'	'stress.biotic'	ATP binding; INVOLVED IN: signal transduction
Medtr3g011390	'20.1'	'stress.biotic'	nucleotide binding; INVOLVED IN: defense response
Medtr3g011480	'20.1'	'stress.biotic'	nucleotide binding; INVOLVED IN: defense response
Medtr3g012250	'20.1'	'stress.biotic'	nucleotide binding; INVOLVED IN: defense response
Medtr3g012270	'20.1'	'stress.biotic'	nucleotide binding; INVOLVED IN: defense response
Medtr3g017620	'20.1'	'stress.biotic'	defense response; LOCATED IN: endomembrane system; EXPRESSED IN: 23 plant structures; EXPRESSED DURING: 14 growth stages; CONTAINS InterPro DOMAIN/s: Leucine-rich repeat-containing protein (InterPro:IPR015766)
Medtr3g020650	'20.1'	'stress.biotic'	putative; FUNCTIONS IN: transmembrane receptor activity
Medtr3g027330	'20.1'	'stress.biotic'	defense response; LOCATED IN: membrane; EXPRESSED IN: leaf; CONTAINS InterPro DOMAIN/s: Leucine-rich repeat-containing N-terminal domain
Medtr3g034030	'20.1'	'stress.biotic'	defense response; LOCATED IN: cell wall; EXPRESSED IN: 13 plant structures; EXPRESSED DURING: 9 growth stages; CONTAINS InterPro DOMAIN/s: Plant disease resistance response protein (InterPro:IPR004265); BEST Arabidopsis thaliana protein match is: Disease resistance-responsive (dirigent-like protein) family protein (TAIR:AT1G22900.1); Has 912 Blast hits to 910 proteins in 44 species: Archae - 0; B…
Medtr3g045020	'20.1'	'stress.biotic'	defense response; LOCATED IN: endomembrane system; EXPRESSED IN: 19 plant structures; EXPRESSED DURING: 13 growth stages; CONTAINS InterPro DOMAIN/s: Leucine-rich repeat-containing N-terminal domain
Medtr3g048860	'20.1'	'stress.biotic'	defense response to fungus
Medtr3g053200	'20.1'	'stress.biotic'	nucleotide binding
Medtr3g055830	'20.1'	'stress.biotic'	nucleotide binding; INVOLVED IN: defense response
Medtr3g055930	'20.1'	'stress.biotic'	nucleotide binding; INVOLVED IN: defense response
Medtr3g056590	'20.1'	'stress.biotic'	nucleotide binding; INVOLVED IN: defense response
Medtr3g058870	'20.1'	'stress.biotic'	putative; FUNCTIONS IN: transmembrane receptor activity
Medtr3g062020	'20.1'	'stress.biotic'	apoptosis
Medtr3g069210	'20.1'	'stress.biotic'	nucleotide binding; INVOLVED IN: defense response
Medtr3g078633	'20.1'	'stress.biotic'	class 3 (InterPro:IPR002921); BEST Arabidopsis thaliana protein match is: alpha/beta-Hydrolases superfamily protein (TAIR:AT3G48080.1); Has 35333 Blast hits to 34131 proteins in 2444 species: Archae - 798; Bacteria - 22429; Metazoa - 974; Fungi - 991; Plants - 531; Viruses - 0; Other Eukaryotes - 9610 (source: NCBI BLink). & (gnl|cdd|85661 : 90.8) no description available & (reliability: 782.0) &…
Medtr3g110280	'20.1'	'stress.biotic'	chitinase activity
Medtr3g114030	'20.1'	'stress.biotic'	conserved site (InterPro:IPR017949)
Medtr3g452800	'20.1'	'stress.biotic'	a potent elicitor of the defense response. FLS2 is directed for degradation by the bacterial ubiquitin ligase AvrPtoB.; FLAGELLIN-SENSITIVE 2 (FLS2); FUNCTIONS IN: protein serine/threonine kinase activity
Medtr3g452850	'20.1'	'stress.biotic'	which is a 5-aa tyrosine-sulfated peptide that primarily promotes cellular proliferation.; phytosylfokine-alpha receptor 2 (PSKR2); FUNCTIONS IN: peptide receptor activity
Medtr3g464870	'20.1'	'stress.biotic'	apoptosis
Medtr3g464950	'20.1'	'stress.biotic'	apoptosis; CONTAINS InterPro DOMAIN/s: NB-ARC (InterPro:IPR002182)
Medtr3g479510	'20.1'	'stress.biotic'	putative; FUNCTIONS IN: transmembrane receptor activity
Medtr4g013315	'20.1'	'stress.biotic'	defense response; LOCATED IN: membrane; EXPRESSED IN: leaf; CONTAINS InterPro DOMAIN/s: Leucine-rich repeat-containing N-terminal domain
Medtr4g013320	'20.1'	'stress.biotic'	lignan biosynthetic process
Medtr4g013325	'20.1'	'stress.biotic'	lignan biosynthetic process
Medtr4g013335	'20.1'	'stress.biotic'	defense response; LOCATED IN: endomembrane system; EXPRESSED IN: 22 plant structures; EXPRESSED DURING: 13 growth stages; CONTAINS InterPro DOMAIN/s: Plant disease resistance response protein (InterPro:IPR004265); BEST Arabidopsis thaliana protein match is: Disease resistance-responsive (dirigent-like protein) family protein (TAIR:AT5G49040.1). & (gnl|cdd|66675 : 148.0) no description available &…
Medtr4g013345	'20.1'	'stress.biotic'	defense response; LOCATED IN: endomembrane system; EXPRESSED IN: 22 plant structures; EXPRESSED DURING: 13 growth stages; CONTAINS InterPro DOMAIN/s: Plant disease resistance response protein (InterPro:IPR004265); BEST Arabidopsis thaliana protein match is: Disease resistance-responsive (dirigent-like protein) family protein (TAIR:AT5G49040.1). & (gnl|cdd|66675 : 145.0) no description available &…
Medtr4g013350	'20.1'	'stress.biotic'	defense response; LOCATED IN: endomembrane system; EXPRESSED IN: 22 plant structures; EXPRESSED DURING: 13 growth stages; CONTAINS InterPro DOMAIN/s: Plant disease resistance response protein (InterPro:IPR004265); BEST Arabidopsis thaliana protein match is: Disease resistance-responsive (dirigent-like protein) family protein (TAIR:AT5G49040.1). & (gnl|cdd|66675 : 148.0) no description available &…
Medtr4g013375	'20.1'	'stress.biotic'	nucleoside-triphosphatase activity
Medtr4g014140	'20.1'	'stress.biotic'	nucleoside-triphosphatase activity
Medtr4g014160	'20.1'	'stress.biotic'	ATP binding; INVOLVED IN: signal transduction
Medtr4g014280	'20.1'	'stress.biotic'	ATP binding; INVOLVED IN: signal transduction
Medtr4g015930	'20.1'	'stress.biotic'	typical subtype (InterPro:IPR003591)
Medtr4g016740	'20.1'	'stress.biotic'	typical subtype (InterPro:IPR003591)
Medtr4g016780	'20.1'	'stress.biotic'	typical subtype (InterPro:IPR003591)
Medtr4g016800	'20.1'	'stress.biotic'	type 2 (InterPro:IPR013210)
Medtr4g016850	'20.1'	'stress.biotic'	typical subtype (InterPro:IPR003591)
Medtr4g017720	'20.1'	'stress.biotic'	defense response; LOCATED IN: membrane; EXPRESSED IN: leaf; CONTAINS InterPro DOMAIN/s: Leucine-rich repeat-containing N-terminal domain
Medtr4g017730	'20.1'	'stress.biotic'	defense response; LOCATED IN: membrane; EXPRESSED IN: leaf; CONTAINS InterPro DOMAIN/s: Leucine-rich repeat-containing N-terminal domain
Medtr4g018940	'20.1'	'stress.biotic'	defense response; LOCATED IN: endomembrane system; EXPRESSED IN: stem
Medtr4g050762	'20.1'	'stress.biotic'	Antigen 5
Medtr4g051662	'20.1'	'stress.biotic'	ATP binding; INVOLVED IN: signal transduction
Medtr4g051698	'20.1'	'stress.biotic'	ATP binding; INVOLVED IN: signal transduction
Medtr4g051715	'20.1'	'stress.biotic'	ATP binding; INVOLVED IN: signal transduction
Medtr4g051738	'20.1'	'stress.biotic'	ATP binding; INVOLVED IN: signal transduction
Medtr4g051880	'20.1'	'stress.biotic'	group 2 (InterPro:IPR004864); BEST Arabidopsis thaliana protein match is: Late embryogenesis abundant (LEA) hydroxyproline-rich glycoprotein family (TAIR:AT5G22200.1); Has 838 Blast hits to 838 proteins in 28 species: Archae - 0; Bacteria - 0; Metazoa - 0; Fungi - 0; Plants - 838; Viruses - 0; Other Eukaryotes - 0 (source: NCBI BLink). & (gnl|cdd|70773 : 136.0) no description available & (reliabi…
Medtr4g071420	'20.1'	'stress.biotic'	drug transmembrane transporter activity; INVOLVED IN: drug transmembrane transport
Medtr4g071445	'20.1'	'stress.biotic'	drug transmembrane transporter activity; INVOLVED IN: drug transmembrane transport
Medtr4g071465	'20.1'	'stress.biotic'	drug transmembrane transporter activity; INVOLVED IN: drug transmembrane transport
Medtr4g073720	'20.1'	'stress.biotic'	pathogenesis-related (InterPro:IPR001938); BEST Arabidopsis thaliana protein match is: THAUMATIN-LIKE PROTEIN 1 (TAIR:AT4G24180.1); Has 1636 Blast hits to 1618 proteins in 187 species: Archae - 0; Bacteria - 43; Metazoa - 60; Fungi - 87; Plants - 1419; Viruses - 4; Other Eukaryotes - 23 (source: NCBI BLink). & (gnl|cdd|47535 : 259.0) no description available & (ipr001938 : 203.1896) Thaumatin
Medtr4g073840	'20.1'	'stress.biotic'	Peronospora parasitica. Encodes an NBS-LRR type R protein with a putative amino-terminal leucine zipper. Fungal protein ATR13 induces RPP13 gene expression and disease resistance.; RECOGNITION OF PERONOSPORA PARASITICA 13 (RPP13); FUNCTIONS IN: ATP binding; INVOLVED IN: defense response
Medtr4g081230	'20.1'	'stress.biotic'	putative; FUNCTIONS IN: transmembrane receptor activity
Medtr4g116920	'20.1'	'stress.biotic'	chitinase activity
Medtr4g417270	'20.1'	'stress.biotic'	defense response; LOCATED IN: endomembrane system; EXPRESSED IN: 10 plant structures; EXPRESSED DURING: 9 growth stages; CONTAINS InterPro DOMAIN/s: Leucine-rich repeat-containing N-terminal domain
Medtr5g015050	'20.1'	'stress.biotic'	T
Medtr5g022350	'20.1'	'stress.biotic'	pathogenesis-related (InterPro:IPR001938); BEST Arabidopsis thaliana protein match is: THAUMATIN-LIKE PROTEIN 1 (TAIR:AT4G24180.1); Has 1636 Blast hits to 1618 proteins in 187 species: Archae - 0; Bacteria - 43; Metazoa - 60; Fungi - 87; Plants - 1419; Viruses - 4; Other Eukaryotes - 23 (source: NCBI BLink). & (gnl|cdd|47535 : 254.0) no description available & (p83332|tlp1_prupe : 238.0) Thaumati…
Medtr5g029240	'20.1'	'stress.biotic'	membrane; EXPRESSED IN: 26 plant structures; EXPRESSED DURING: 14 growth stages; CONTAINS InterPro DOMAIN/s: Defender against death DAD protein (InterPro:IPR003038); BEST Arabidopsis thaliana protein match is: Defender against death (DAD family) protein (TAIR:AT2G35520.1); Has 458 Blast hits to 458 proteins in 196 species: Archae - 0; Bacteria - 0; Metazoa - 197; Fungi - 115; Plants - 102; Viruse…
Medtr5g035300	'20.1'	'stress.biotic'	defense response; LOCATED IN: endomembrane system; EXPRESSED IN: 23 plant structures; EXPRESSED DURING: 14 growth stages; CONTAINS InterPro DOMAIN/s: Leucine-rich repeat-containing protein (InterPro:IPR015766)
Medtr5g037500	'20.1'	'stress.biotic'	defense response; CONTAINS InterPro DOMAIN/s: NB-ARC (InterPro:IPR002182)
Medtr5g043800	'20.1'	'stress.biotic'	typical subtype (InterPro:IPR003591)
Medtr5g060950	'20.1'	'stress.biotic'	TGA3 has a highly conserved bZIP region and exhibits similar DNA-binding properties.; TGA1A-related gene 3 (TGA3); CONTAINS InterPro DOMAIN/s: Basic-leucine zipper (bZIP) transcription factor (InterPro:IPR004827)
Medtr5g080000	'20.1'	'stress.biotic'	typical subtype (InterPro:IPR003591)
Medtr5g085400	'20.1'	'stress.biotic'	nucleotide binding
Medtr5g086530	'20.1'	'stress.biotic'	defense response; LOCATED IN: endomembrane system; EXPRESSED IN: stem
Medtr5g086550	'20.1'	'stress.biotic'	defense response; LOCATED IN: endomembrane system; EXPRESSED IN: stem
Medtr5g086620	'20.1'	'stress.biotic'	defense response; LOCATED IN: membrane; EXPRESSED IN: leaf; CONTAINS InterPro DOMAIN/s: Leucine-rich repeat-containing N-terminal domain
Medtr5g086630	'20.1'	'stress.biotic'	defense response; LOCATED IN: membrane; EXPRESSED IN: leaf; CONTAINS InterPro DOMAIN/s: Leucine-rich repeat-containing N-terminal domain
Medtr5g087090	'20.1'	'stress.biotic'	defense response; LOCATED IN: membrane; EXPRESSED IN: leaf; CONTAINS InterPro DOMAIN/s: Leucine-rich repeat-containing N-terminal domain
Medtr5g087320	'20.1'	'stress.biotic'	defense response; LOCATED IN: membrane; EXPRESSED IN: leaf; CONTAINS InterPro DOMAIN/s: Leucine-rich repeat-containing N-terminal domain
Medtr5g094800	'20.1'	'stress.biotic'	defense response; LOCATED IN: membrane; EXPRESSED IN: leaf; CONTAINS InterPro DOMAIN/s: Leucine-rich repeat-containing N-terminal domain
Medtr5g095420	'20.1'	'stress.biotic'	defense response; LOCATED IN: chloroplast; EXPRESSED IN: 10 plant structures; EXPRESSED DURING: 10 growth stages; CONTAINS InterPro DOMAIN/s: Leucine-rich repeat
Medtr5g096150	'20.1'	'stress.biotic'	which catalyzes one step in the breakdown of the porphyrin component of chlorophyll. The enzyme was further assessed to be a Type-1 (pFCC-1-producing) RCCR.Upon P. syringae infection
Medtr5g096320	'20.1'	'stress.biotic'	defense response; LOCATED IN: endomembrane system; EXPRESSED IN: 22 plant structures; EXPRESSED DURING: 13 growth stages; CONTAINS InterPro DOMAIN/s: Leucine-rich repeat
Medtr6g008140	'20.1'	'stress.biotic'	putative; FUNCTIONS IN: transmembrane receptor activity
Medtr6g009480	'20.1'	'stress.biotic'	pathogenesis-related (InterPro:IPR001938); BEST Arabidopsis thaliana protein match is: Pathogenesis-related thaumatin superfamily protein (TAIR:AT4G38660.1); Has 1558 Blast hits to 1540 proteins in 173 species: Archae - 0; Bacteria - 31; Metazoa - 56; Fungi - 80; Plants - 1384; Viruses - 0; Other Eukaryotes - 7 (source: NCBI BLink). & (gnl|cdd|47535 : 211.0) no description available & (p83335|tlp…
Medtr6g016790	'20.1'	'stress.biotic'	acting on glycosyl bonds
Medtr6g016810	'20.1'	'stress.biotic'	acting on glycosyl bonds
Medtr6g038820	'20.1'	'stress.biotic'	defense response to fungus
Medtr6g071430	'20.1'	'stress.biotic'	putative; FUNCTIONS IN: transmembrane receptor activity
Medtr6g071935	'20.1'	'stress.biotic'	putative; FUNCTIONS IN: transmembrane receptor activity
Medtr6g071945	'20.1'	'stress.biotic'	ATP binding; INVOLVED IN: signal transduction
Medtr6g072310	'20.1'	'stress.biotic'	putative; FUNCTIONS IN: transmembrane receptor activity
Medtr6g072320	'20.1'	'stress.biotic'	ATP binding; INVOLVED IN: signal transduction
Medtr6g072450	'20.1'	'stress.biotic'	ATP binding; INVOLVED IN: signal transduction
Medtr6g072480	'20.1'	'stress.biotic'	ATP binding; INVOLVED IN: signal transduction
Medtr6g072510	'20.1'	'stress.biotic'	putative; FUNCTIONS IN: transmembrane receptor activity
Medtr6g072540	'20.1'	'stress.biotic'	ATP binding; INVOLVED IN: signal transduction
Medtr6g072600	'20.1'	'stress.biotic'	ATP binding; INVOLVED IN: signal transduction
Medtr6g073880	'20.1'	'stress.biotic'	ATP binding; INVOLVED IN: signal transduction
Medtr6g074030	'20.1'	'stress.biotic'	ATP binding; INVOLVED IN: signal transduction
Medtr6g074650	'20.1'	'stress.biotic'	putative; FUNCTIONS IN: transmembrane receptor activity
Medtr6g074660	'20.1'	'stress.biotic'	ATP binding; INVOLVED IN: signal transduction
Medtr6g074875	'20.1'	'stress.biotic'	putative; FUNCTIONS IN: transmembrane receptor activity
Medtr6g075780	'20.1'	'stress.biotic'	putative; FUNCTIONS IN: transmembrane receptor activity
Medtr6g075970	'20.1'	'stress.biotic'	putative; FUNCTIONS IN: transmembrane receptor activity
Medtr6g083200	'20.1'	'stress.biotic'	Glycoside hydrolase
Medtr6g083310	'20.1'	'stress.biotic'	Glycoside hydrolase
Medtr6g083860	'20.1'	'stress.biotic'	putative; FUNCTIONS IN: transmembrane receptor activity
Medtr6g087850	'20.1'	'stress.biotic'	putative; FUNCTIONS IN: transmembrane receptor activity
Medtr6g452490	'20.1'	'stress.biotic'	defense response; LOCATED IN: endomembrane system; EXPRESSED IN: 23 plant structures; EXPRESSED DURING: 14 growth stages; CONTAINS InterPro DOMAIN/s: Leucine-rich repeat-containing protein (InterPro:IPR015766)
Medtr6g463150	'20.1'	'stress.biotic'	nucleotide binding
Medtr7g009420	'20.1'	'stress.biotic'	defense response; LOCATED IN: endomembrane system; EXPRESSED IN: stem
Medtr7g009450	'20.1'	'stress.biotic'	defense response; LOCATED IN: membrane; EXPRESSED IN: leaf; CONTAINS InterPro DOMAIN/s: Leucine-rich repeat-containing N-terminal domain
Medtr7g009470	'20.1'	'stress.biotic'	defense response; LOCATED IN: membrane; EXPRESSED IN: leaf; CONTAINS InterPro DOMAIN/s: Leucine-rich repeat-containing N-terminal domain
Medtr7g009510	'20.1'	'stress.biotic'	defense response; LOCATED IN: membrane; EXPRESSED IN: leaf; CONTAINS InterPro DOMAIN/s: Leucine-rich repeat-containing N-terminal domain
Medtr7g009540	'20.1'	'stress.biotic'	defense response; LOCATED IN: membrane; EXPRESSED IN: leaf; CONTAINS InterPro DOMAIN/s: Leucine-rich repeat-containing N-terminal domain
Medtr7g009560	'20.1'	'stress.biotic'	T
Medtr7g009570	'20.1'	'stress.biotic'	defense response; LOCATED IN: membrane; EXPRESSED IN: leaf; CONTAINS InterPro DOMAIN/s: Leucine-rich repeat-containing N-terminal domain
Medtr7g009790	'20.1'	'stress.biotic'	defense response; LOCATED IN: endomembrane system; EXPRESSED IN: 7 plant structures; EXPRESSED DURING: LP.04 four leaves visible
Medtr7g013810	'20.1'	'stress.biotic'	acting on glycosyl bonds
Medtr7g018850	'20.1'	'stress.biotic'	apoptosis; CONTAINS InterPro DOMAIN/s: NB-ARC (InterPro:IPR002182)
Medtr7g021640	'20.1'	'stress.biotic'	salt and drought stresses. Also involved in root hair development
Medtr7g053620	'20.1'	'stress.biotic'	ATP binding; INVOLVED IN: signal transduction
Medtr7g066590	'20.1'	'stress.biotic'	typical subtype (InterPro:IPR003591)
Medtr7g070390	'20.1'	'stress.biotic'	lignan biosynthetic process
Medtr7g078180	'20.1'	'stress.biotic'	putative; FUNCTIONS IN: transmembrane receptor activity
Medtr7g078300	'20.1'	'stress.biotic'	defense response; LOCATED IN: endomembrane system; EXPRESSED IN: 23 plant structures; EXPRESSED DURING: 14 growth stages; CONTAINS InterPro DOMAIN/s: Leucine-rich repeat-containing protein (InterPro:IPR015766)
Medtr7g078640	'20.1'	'stress.biotic'	defense response; LOCATED IN: endomembrane system; EXPRESSED IN: 23 plant structures; EXPRESSED DURING: 14 growth stages; CONTAINS InterPro DOMAIN/s: Leucine-rich repeat-containing protein (InterPro:IPR015766)
Medtr7g078780	'20.1'	'stress.biotic'	putative; FUNCTIONS IN: transmembrane receptor activity
Medtr7g091110	'20.1'	'stress.biotic'	defense response; LOCATED IN: endomembrane system; EXPRESSED IN: 23 plant structures; EXPRESSED DURING: 14 growth stages; CONTAINS InterPro DOMAIN/s: Leucine-rich repeat-containing protein (InterPro:IPR015766)
Medtr7g091140	'20.1'	'stress.biotic'	defense response; LOCATED IN: endomembrane system; EXPRESSED IN: 23 plant structures; EXPRESSED DURING: 14 growth stages; CONTAINS InterPro DOMAIN/s: Leucine-rich repeat-containing protein (InterPro:IPR015766)
Medtr7g091190	'20.1'	'stress.biotic'	defense response; LOCATED IN: endomembrane system; EXPRESSED IN: 23 plant structures; EXPRESSED DURING: 14 growth stages; CONTAINS InterPro DOMAIN/s: Leucine-rich repeat-containing protein (InterPro:IPR015766)
Medtr7g091550	'20.1'	'stress.biotic'	defense response; LOCATED IN: endomembrane system; EXPRESSED IN: 23 plant structures; EXPRESSED DURING: 14 growth stages; CONTAINS InterPro DOMAIN/s: Leucine-rich repeat-containing protein (InterPro:IPR015766)
Medtr7g093850	'20.1'	'stress.biotic'	T
Medtr7g105970	'20.1'	'stress.biotic'	spermine and during senescence. The gene product is localized to the chloroplast.; YELLOW-LEAF-SPECIFIC GENE 9 (YLS9); FUNCTIONS IN: molecular_function unknown; INVOLVED IN: defense response to virus
Medtr7g114470	'20.1'	'stress.biotic'	transferring acyl groups other than amino-acyl groups; INVOLVED IN: biological_process unknown; LOCATED IN: cellular_component unknown; EXPRESSED IN: 9 plant structures; EXPRESSED DURING: 4 anthesis
Medtr7g114490	'20.1'	'stress.biotic'	transferring acyl groups other than amino-acyl groups; INVOLVED IN: biological_process unknown; LOCATED IN: cellular_component unknown; EXPRESSED IN: 9 plant structures; EXPRESSED DURING: 4 anthesis
Medtr7g114550	'20.1'	'stress.biotic'	transferring acyl groups other than amino-acyl groups; INVOLVED IN: biological_process unknown; LOCATED IN: cellular_component unknown; EXPRESSED IN: 9 plant structures; EXPRESSED DURING: 4 anthesis
Medtr7g114560	'20.1'	'stress.biotic'	transferring acyl groups other than amino-acyl groups; INVOLVED IN: biological_process unknown; LOCATED IN: cellular_component unknown; EXPRESSED IN: 9 plant structures; EXPRESSED DURING: 4 anthesis
Medtr7g491180	'20.1'	'stress.biotic'	defense response; LOCATED IN: endomembrane system; EXPRESSED IN: 23 plant structures; EXPRESSED DURING: 14 growth stages; CONTAINS InterPro DOMAIN/s: Leucine-rich repeat-containing protein (InterPro:IPR015766)
Medtr8g010440	'20.1'	'stress.biotic'	defense response; CONTAINS InterPro DOMAIN/s: NB-ARC (InterPro:IPR002182)
Medtr8g011300	'20.1'	'stress.biotic'	defense response; LOCATED IN: endomembrane system; EXPRESSED IN: 23 plant structures; EXPRESSED DURING: 14 growth stages; CONTAINS InterPro DOMAIN/s: Leucine-rich repeat-containing protein (InterPro:IPR015766)
Medtr8g012960	'20.1'	'stress.biotic'	which is 'guarded' by R protein complex (RPM1 and RPS2 proteins). RIN4 physically interacts with RPS2 and RPM1 in vivo. Bacterial avirulence (Avr) effectors AvrB
Medtr8g016440	'20.1'	'stress.biotic'	putative; FUNCTIONS IN: transmembrane receptor activity
Medtr8g016480	'20.1'	'stress.biotic'	putative; FUNCTIONS IN: transmembrane receptor activity
Medtr8g016580	'20.1'	'stress.biotic'	putative; FUNCTIONS IN: transmembrane receptor activity
Medtr8g016650	'20.1'	'stress.biotic'	putative; FUNCTIONS IN: transmembrane receptor activity
Medtr8g018270	'20.1'	'stress.biotic'	putative; FUNCTIONS IN: transmembrane receptor activity
Medtr8g018480	'20.1'	'stress.biotic'	putative; FUNCTIONS IN: transmembrane receptor activity
Medtr8g018750	'20.1'	'stress.biotic'	ATP binding; INVOLVED IN: signal transduction
Medtr8g020290	'20.1'	'stress.biotic'	nucleoside-triphosphatase activity
Medtr8g020300	'20.1'	'stress.biotic'	nucleoside-triphosphatase activity
Medtr8g028450	'20.1'	'stress.biotic'	plasma membrane
Medtr8g032420	'20.1'	'stress.biotic'	putative; FUNCTIONS IN: transmembrane receptor activity
Medtr8g038815	'20.1'	'stress.biotic'	putative; FUNCTIONS IN: transmembrane receptor activity
Medtr8g039950	'20.1'	'stress.biotic'	transferring acyl groups other than amino-acyl groups; INVOLVED IN: biological_process unknown; LOCATED IN: cellular_component unknown; EXPRESSED IN: 9 plant structures; EXPRESSED DURING: 4 anthesis
Medtr8g040920	'20.1'	'stress.biotic'	typical subtype (InterPro:IPR003591)
Medtr8g042660	'20.1'	'stress.biotic'	ATP binding; INVOLVED IN: signal transduction
Medtr8g045300	'20.1'	'stress.biotic'	defense response; LOCATED IN: cellular_component unknown; EXPRESSED IN: 22 plant structures; EXPRESSED DURING: 14 growth stages; CONTAINS InterPro DOMAIN/s: Bet v I allergen (InterPro:IPR000916); BEST Arabidopsis thaliana protein match is: MLP-like protein 34 (TAIR:AT1G70850.3); Has 30201 Blast hits to 17322 proteins in 780 species: Archae - 12; Bacteria - 1396; Metazoa - 17338; Fungi - 3422; Pla…
Medtr8g045640	'20.1'	'stress.biotic'	defense response; LOCATED IN: cellular_component unknown; EXPRESSED IN: 8 plant structures; EXPRESSED DURING: 6 growth stages; CONTAINS InterPro DOMAIN/s: Bet v I allergen (InterPro:IPR000916); BEST Arabidopsis thaliana protein match is: Polyketide cyclase/dehydrase and lipid transport superfamily protein (TAIR:AT5G28000.1); Has 1807 Blast hits to 1807 proteins in 277 species: Archae - 0; Bacteri…
Medtr8g045665	'20.1'	'stress.biotic'	defense response; LOCATED IN: cellular_component unknown; EXPRESSED IN: 8 plant structures; EXPRESSED DURING: 6 growth stages; CONTAINS InterPro DOMAIN/s: Bet v I allergen (InterPro:IPR000916); BEST Arabidopsis thaliana protein match is: Polyketide cyclase/dehydrase and lipid transport superfamily protein (TAIR:AT5G28000.1); Has 1807 Blast hits to 1807 proteins in 277 species: Archae - 0; Bacteri…
Medtr8g045735	'20.1'	'stress.biotic'	defense response; LOCATED IN: cellular_component unknown; EXPRESSED IN: 8 plant structures; EXPRESSED DURING: 6 growth stages; CONTAINS InterPro DOMAIN/s: Bet v I allergen (InterPro:IPR000916); BEST Arabidopsis thaliana protein match is: Polyketide cyclase/dehydrase and lipid transport superfamily protein (TAIR:AT5G28000.1); Has 1807 Blast hits to 1807 proteins in 277 species: Archae - 0; Bacteri…
Medtr8g059345	'20.1'	'stress.biotic'	nucleotide binding
Medtr8g074350	'20.1'	'stress.biotic'	defense response to fungus
Medtr8g075440	'20.1'	'stress.biotic'	ATP binding; INVOLVED IN: signal transduction
Medtr8g090310	'20.1'	'stress.biotic'	putative; FUNCTIONS IN: transmembrane receptor activity
Medtr8g099060	'20.1'	'stress.biotic'	T
Medtr8g433020	'20.1'	'stress.biotic'	putative; FUNCTIONS IN: transmembrane receptor activity
Medtr8g494200	'20.1'	'stress.biotic'	another disease resistance signaling protein. Expressed at elevated level in response to green peach aphid (GPA) feeding
Medtr2g043900	'20.1.1'	'stress.biotic.respiratory burst'	membrane; EXPRESSED IN: 7 plant structures; EXPRESSED DURING: petal differentiation and expansion stage; CONTAINS InterPro DOMAIN/s: Ferredoxin reductase-type FAD-binding domain (InterPro:IPR017927)
Medtr4g109530	'20.1.1'	'stress.biotic.respiratory burst'	integral to plasma membrane; EXPRESSED IN: 22 plant structures; EXPRESSED DURING: 13 growth stages; CONTAINS InterPro DOMAIN/s: Ferredoxin reductase-type FAD-binding domain (InterPro:IPR017927)
Medtr7g113130	'20.1.1'	'stress.biotic.respiratory burst'	seed germination
Medtr8g099030	'20.1.1'	'stress.biotic.respiratory burst'	integral to plasma membrane; EXPRESSED IN: 22 plant structures; EXPRESSED DURING: 13 growth stages; CONTAINS InterPro DOMAIN/s: Ferredoxin reductase-type FAD-binding domain (InterPro:IPR017927)
Medtr0038s0040	'20.1.2'	'stress.biotic.receptors'	ATP binding; INVOLVED IN: signal transduction
Medtr0038s0060	'20.1.2'	'stress.biotic.receptors'	ATP binding; INVOLVED IN: signal transduction
Medtr6g074885	'20.1.2'	'stress.biotic.receptors'	ATP binding; INVOLVED IN: signal transduction
Medtr6g075870	'20.1.2'	'stress.biotic.receptors'	ATP binding; INVOLVED IN: signal transduction
Medtr6g075880	'20.1.2'	'stress.biotic.receptors'	ATP binding; INVOLVED IN: signal transduction
Medtr6g075930	'20.1.2'	'stress.biotic.receptors'	ATP binding; INVOLVED IN: defense response to fungus
Medtr6g075950	'20.1.2'	'stress.biotic.receptors'	ATP binding; INVOLVED IN: signal transduction
Medtr6g077355	'20.1.2'	'stress.biotic.receptors'	ATP binding; INVOLVED IN: signal transduction
Medtr6g078780	'20.1.2'	'stress.biotic.receptors'	ATP binding; INVOLVED IN: signal transduction
Medtr6g472220	'20.1.2'	'stress.biotic.receptors'	defense response; LOCATED IN: intrinsic to membrane; EXPRESSED IN: 19 plant structures; EXPRESSED DURING: 10 growth stages; CONTAINS InterPro DOMAIN/s: Toll-Interleukin receptor (InterPro:IPR000157); BEST Arabidopsis thaliana protein match is: Toll-Interleukin-Resistance (TIR) domain-containing protein (TAIR:AT1G72940.1); Has 1749 Blast hits to 1659 proteins in 68 species: Archae - 0; Bacteria - …
Medtr6g472270	'20.1.2'	'stress.biotic.receptors'	defense response; LOCATED IN: intrinsic to membrane; EXPRESSED IN: 19 plant structures; EXPRESSED DURING: 10 growth stages; CONTAINS InterPro DOMAIN/s: Toll-Interleukin receptor (InterPro:IPR000157); BEST Arabidopsis thaliana protein match is: Toll-Interleukin-Resistance (TIR) domain-containing protein (TAIR:AT1G72940.1); Has 1749 Blast hits to 1659 proteins in 68 species: Archae - 0; Bacteria - …
Medtr8g039930	'20.1.2'	'stress.biotic.receptors'	putative; FUNCTIONS IN: transmembrane receptor activity
Medtr8g093335	'20.1.3'	'stress.biotic.signalling'	T
Medtr8g093390	'20.1.3'	'stress.biotic.signalling'	T
Medtr2g079500	'20.1.3.1'	'stress.biotic.signalling.MLO-like'	homologs of the barley mildew resistance locus o (MLO) protein. The Arabidopsis genome contains 15 genes encoding MLO proteins
Medtr3g118190	'20.1.3.1'	'stress.biotic.signalling.MLO-like'	homologs of the barley mildew resistance locus o (MLO) protein. The Arabidopsis genome contains 15 genes encoding MLO proteins
Medtr8g073130	'20.1.3.1'	'stress.biotic.signalling.MLO-like'	homologs of the barley mildew resistance locus o (MLO) protein. The Arabidopsis genome contains 15 genes encoding MLO proteins
Medtr8g470550	'20.1.4'	'stress.biotic.kinases'	transmembrane receptor protein kinase activity
Medtr0006s0240	'20.1.7'	'stress.biotic.PR-proteins'	nucleotide binding
Medtr0007s0090	'20.1.7'	'stress.biotic.PR-proteins'	putative; FUNCTIONS IN: transmembrane receptor activity
Medtr0012s0150	'20.1.7'	'stress.biotic.PR-proteins'	nucleotide binding
Medtr0012s0290	'20.1.7'	'stress.biotic.PR-proteins'	ATP binding; INVOLVED IN: signal transduction
Medtr0087s0020	'20.1.7'	'stress.biotic.PR-proteins'	defense response to fungus
Medtr0087s0040	'20.1.7'	'stress.biotic.PR-proteins'	defense response to fungus
Medtr0087s0090	'20.1.7'	'stress.biotic.PR-proteins'	defense response to fungus
Medtr0294s0010	'20.1.7'	'stress.biotic.PR-proteins'	ATP binding; INVOLVED IN: signal transduction
Medtr0468s0010	'20.1.7'	'stress.biotic.PR-proteins'	ATP binding; INVOLVED IN: signal transduction
Medtr1g052170	'20.1.7'	'stress.biotic.PR-proteins'	putative; FUNCTIONS IN: transmembrane receptor activity
Medtr1g099240	'20.1.7'	'stress.biotic.PR-proteins'	defense response to fungus
Medtr1g099250	'20.1.7'	'stress.biotic.PR-proteins'	defense response to fungus
Medtr1g099290	'20.1.7'	'stress.biotic.PR-proteins'	hydrolase activity
Medtr1g099320	'20.1.7'	'stress.biotic.PR-proteins'	hydrolase activity
Medtr1g101250	'20.1.7'	'stress.biotic.PR-proteins'	defense response to fungus
Medtr1g115225	'20.1.7'	'stress.biotic.PR-proteins'	defense response; LOCATED IN: cell wall; EXPRESSED IN: 17 plant structures; EXPRESSED DURING: 10 growth stages; CONTAINS InterPro DOMAIN/s: Leucine-rich repeat-containing N-terminal domain
Medtr1g115515	'20.1.7'	'stress.biotic.PR-proteins'	T
Medtr2g012990	'20.1.7'	'stress.biotic.PR-proteins'	putative; INVOLVED IN: defense response; LOCATED IN: cellular_component unknown; EXPRESSED IN: 23 plant structures; EXPRESSED DURING: 13 growth stages; BEST Arabidopsis thaliana protein match is: COP1-interacting protein 7 (TAIR:AT4G27430.2). & (reliability: 820.0) & (original description: no original description)'
Medtr2g017420	'20.1.7'	'stress.biotic.PR-proteins'	defense response to fungus
Medtr2g037140	'20.1.7'	'stress.biotic.PR-proteins'	putative; FUNCTIONS IN: transmembrane receptor activity
Medtr2g037690	'20.1.7'	'stress.biotic.PR-proteins'	putative; FUNCTIONS IN: transmembrane receptor activity
Medtr2g046780	'20.1.7'	'stress.biotic.PR-proteins'	defense response to fungus
Medtr2g055360	'20.1.7'	'stress.biotic.PR-proteins'	defense response to fungus
Medtr2g063777	'20.1.7'	'stress.biotic.PR-proteins'	defense response; LOCATED IN: endomembrane system; EXPRESSED IN: 23 plant structures; EXPRESSED DURING: 14 growth stages; CONTAINS InterPro DOMAIN/s: Leucine-rich repeat-containing protein (InterPro:IPR015766)
Medtr2g099920	'20.1.7'	'stress.biotic.PR-proteins'	putative; FUNCTIONS IN: transmembrane receptor activity
Medtr2g450870	'20.1.7'	'stress.biotic.PR-proteins'	defense response to fungus
Medtr3g009050	'20.1.7'	'stress.biotic.PR-proteins'	response to karrikin
Medtr3g014390	'20.1.7'	'stress.biotic.PR-proteins'	defense response; LOCATED IN: endomembrane system; EXPRESSED IN: 23 plant structures; EXPRESSED DURING: 14 growth stages; CONTAINS InterPro DOMAIN/s: Leucine-rich repeat-containing protein (InterPro:IPR015766)
Medtr3g014470	'20.1.7'	'stress.biotic.PR-proteins'	defense response; LOCATED IN: endomembrane system; EXPRESSED IN: 23 plant structures; EXPRESSED DURING: 14 growth stages; CONTAINS InterPro DOMAIN/s: Leucine-rich repeat-containing protein (InterPro:IPR015766)
Medtr3g015280	'20.1.7'	'stress.biotic.PR-proteins'	defense response; LOCATED IN: endomembrane system; EXPRESSED IN: 23 plant structures; EXPRESSED DURING: 14 growth stages; CONTAINS InterPro DOMAIN/s: Leucine-rich repeat-containing protein (InterPro:IPR015766)
Medtr3g020510	'20.1.7'	'stress.biotic.PR-proteins'	putative; FUNCTIONS IN: transmembrane receptor activity
Medtr3g022060	'20.1.7'	'stress.biotic.PR-proteins'	defense response; LOCATED IN: endomembrane system; EXPRESSED IN: 23 plant structures; EXPRESSED DURING: 14 growth stages; CONTAINS InterPro DOMAIN/s: Leucine-rich repeat-containing protein (InterPro:IPR015766)
Medtr3g022130	'20.1.7'	'stress.biotic.PR-proteins'	defense response; LOCATED IN: endomembrane system; EXPRESSED IN: 23 plant structures; EXPRESSED DURING: 14 growth stages; CONTAINS InterPro DOMAIN/s: Leucine-rich repeat-containing protein (InterPro:IPR015766)
Medtr3g022400	'20.1.7'	'stress.biotic.PR-proteins'	defense response; LOCATED IN: endomembrane system; EXPRESSED IN: 23 plant structures; EXPRESSED DURING: 14 growth stages; CONTAINS InterPro DOMAIN/s: Leucine-rich repeat-containing protein (InterPro:IPR015766)
Medtr3g024460	'20.1.7'	'stress.biotic.PR-proteins'	defense response; LOCATED IN: endomembrane system; EXPRESSED IN: 23 plant structures; EXPRESSED DURING: 14 growth stages; CONTAINS InterPro DOMAIN/s: Leucine-rich repeat-containing protein (InterPro:IPR015766)
Medtr3g026990	'20.1.7'	'stress.biotic.PR-proteins'	defense response to fungus
Medtr3g031520	'20.1.7'	'stress.biotic.PR-proteins'	defense response to fungus
Medtr3g032110	'20.1.7'	'stress.biotic.PR-proteins'	defense response; LOCATED IN: endomembrane system; EXPRESSED IN: 23 plant structures; EXPRESSED DURING: 14 growth stages; CONTAINS InterPro DOMAIN/s: Leucine-rich repeat-containing protein (InterPro:IPR015766)
Medtr3g032340	'20.1.7'	'stress.biotic.PR-proteins'	defense response; LOCATED IN: endomembrane system; EXPRESSED IN: 23 plant structures; EXPRESSED DURING: 14 growth stages; CONTAINS InterPro DOMAIN/s: Leucine-rich repeat-containing protein (InterPro:IPR015766)
Medtr3g032760	'20.1.7'	'stress.biotic.PR-proteins'	defense response; LOCATED IN: endomembrane system; EXPRESSED IN: 23 plant structures; EXPRESSED DURING: 14 growth stages; CONTAINS InterPro DOMAIN/s: Leucine-rich repeat-containing protein (InterPro:IPR015766)
Medtr3g032800	'20.1.7'	'stress.biotic.PR-proteins'	defense response; LOCATED IN: endomembrane system; EXPRESSED IN: 23 plant structures; EXPRESSED DURING: 14 growth stages; CONTAINS InterPro DOMAIN/s: Leucine-rich repeat-containing protein (InterPro:IPR015766)
Medtr3g033240	'20.1.7'	'stress.biotic.PR-proteins'	defense response; LOCATED IN: endomembrane system; EXPRESSED IN: 23 plant structures; EXPRESSED DURING: 14 growth stages; CONTAINS InterPro DOMAIN/s: Leucine-rich repeat-containing protein (InterPro:IPR015766)
Medtr3g048910	'20.1.7'	'stress.biotic.PR-proteins'	defense response to fungus
Medtr3g082130	'20.1.7'	'stress.biotic.PR-proteins'	defense response to fungus
Medtr3g086070	'20.1.7'	'stress.biotic.PR-proteins'	defense response; LOCATED IN: endomembrane system; EXPRESSED IN: 23 plant structures; EXPRESSED DURING: 14 growth stages; CONTAINS InterPro DOMAIN/s: Leucine-rich repeat-containing protein (InterPro:IPR015766)
Medtr3g435720	'20.1.7'	'stress.biotic.PR-proteins'	defense response; LOCATED IN: endomembrane system; EXPRESSED IN: 23 plant structures; EXPRESSED DURING: 14 growth stages; CONTAINS InterPro DOMAIN/s: Leucine-rich repeat-containing protein (InterPro:IPR015766)
Medtr3g452760	'20.1.7'	'stress.biotic.PR-proteins'	defense response to fungus
Medtr3g452900	'20.1.7'	'stress.biotic.PR-proteins'	defense response; LOCATED IN: endomembrane system; EXPRESSED IN: 19 plant structures; EXPRESSED DURING: 13 growth stages; CONTAINS InterPro DOMAIN/s: Leucine-rich repeat-containing N-terminal domain
Medtr4g011310	'20.1.7'	'stress.biotic.PR-proteins'	defense response to fungus
Medtr4g015060	'20.1.7'	'stress.biotic.PR-proteins'	ATP binding; INVOLVED IN: signal transduction
Medtr4g018970	'20.1.7'	'stress.biotic.PR-proteins'	defense response to fungus
Medtr4g020550	'20.1.7'	'stress.biotic.PR-proteins'	ATP binding; INVOLVED IN: signal transduction
Medtr4g051682	'20.1.7'	'stress.biotic.PR-proteins'	putative; FUNCTIONS IN: transmembrane receptor activity
Medtr4g124920	'20.1.7'	'stress.biotic.PR-proteins'	defense response to bacterium; LOCATED IN: plasma membrane; EXPRESSED IN: 24 plant structures; EXPRESSED DURING: 13 growth stages; CONTAINS InterPro DOMAIN/s: Stress responsive alpha-beta barrel (InterPro:IPR013097)
Medtr5g028340	'20.1.7'	'stress.biotic.PR-proteins'	defense response; CONTAINS InterPro DOMAIN/s: NB-ARC (InterPro:IPR002182)
Medtr5g034770	'20.1.7'	'stress.biotic.PR-proteins'	defense response; LOCATED IN: endomembrane system; EXPRESSED IN: 23 plant structures; EXPRESSED DURING: 14 growth stages; CONTAINS InterPro DOMAIN/s: Leucine-rich repeat-containing protein (InterPro:IPR015766)
Medtr5g035240	'20.1.7'	'stress.biotic.PR-proteins'	defense response; LOCATED IN: endomembrane system; EXPRESSED IN: 23 plant structures; EXPRESSED DURING: 14 growth stages; CONTAINS InterPro DOMAIN/s: Leucine-rich repeat-containing protein (InterPro:IPR015766)
Medtr5g035280	'20.1.7'	'stress.biotic.PR-proteins'	defense response; LOCATED IN: endomembrane system; EXPRESSED IN: 23 plant structures; EXPRESSED DURING: 14 growth stages; CONTAINS InterPro DOMAIN/s: Leucine-rich repeat-containing protein (InterPro:IPR015766)
Medtr5g047390	'20.1.7'	'stress.biotic.PR-proteins'	defense response to fungus
Medtr5g047480	'20.1.7'	'stress.biotic.PR-proteins'	ATP binding; INVOLVED IN: signal transduction
Medtr5g047530	'20.1.7'	'stress.biotic.PR-proteins'	ATP binding; INVOLVED IN: signal transduction
Medtr5g085910	'20.1.7'	'stress.biotic.PR-proteins'	defense response to fungus
Medtr5g086570	'20.1.7'	'stress.biotic.PR-proteins'	defense response; LOCATED IN: endomembrane system; EXPRESSED IN: stem
Medtr5g086690	'20.1.7'	'stress.biotic.PR-proteins'	ATP binding; INVOLVED IN: signal transduction
Medtr5g086945	'20.1.7'	'stress.biotic.PR-proteins'	defense response; LOCATED IN: endomembrane system; CONTAINS InterPro DOMAIN/s: Leucine-rich repeat
Medtr5g092990	'20.1.7'	'stress.biotic.PR-proteins'	putative; FUNCTIONS IN: transmembrane receptor activity
Medtr5g095910	'20.1.7'	'stress.biotic.PR-proteins'	defense response; LOCATED IN: endomembrane system; EXPRESSED IN: 23 plant structures; EXPRESSED DURING: 14 growth stages; CONTAINS InterPro DOMAIN/s: Leucine-rich repeat-containing protein (InterPro:IPR015766)
Medtr6g015405	'20.1.7'	'stress.biotic.PR-proteins'	ATP binding; INVOLVED IN: signal transduction
Medtr6g015430	'20.1.7'	'stress.biotic.PR-proteins'	ATP binding; INVOLVED IN: signal transduction
Medtr6g015490	'20.1.7'	'stress.biotic.PR-proteins'	ATP binding; INVOLVED IN: signal transduction
Medtr6g015505	'20.1.7'	'stress.biotic.PR-proteins'	ATP binding; INVOLVED IN: signal transduction
Medtr6g015510	'20.1.7'	'stress.biotic.PR-proteins'	ATP binding; INVOLVED IN: signal transduction
Medtr6g015675	'20.1.7'	'stress.biotic.PR-proteins'	ATP binding; INVOLVED IN: signal transduction
Medtr6g015680	'20.1.7'	'stress.biotic.PR-proteins'	ATP binding; INVOLVED IN: signal transduction
Medtr6g015695	'20.1.7'	'stress.biotic.PR-proteins'	ATP binding; INVOLVED IN: signal transduction
Medtr6g015720	'20.1.7'	'stress.biotic.PR-proteins'	ATP binding; INVOLVED IN: signal transduction
Medtr6g015730	'20.1.7'	'stress.biotic.PR-proteins'	ATP binding; INVOLVED IN: signal transduction
Medtr6g015745	'20.1.7'	'stress.biotic.PR-proteins'	ATP binding; INVOLVED IN: signal transduction
Medtr6g015750	'20.1.7'	'stress.biotic.PR-proteins'	ATP binding; INVOLVED IN: signal transduction
Medtr6g016050	'20.1.7'	'stress.biotic.PR-proteins'	defense response to fungus
Medtr6g016195	'20.1.7'	'stress.biotic.PR-proteins'	defense response to fungus
Medtr6g016210	'20.1.7'	'stress.biotic.PR-proteins'	defense response to fungus
Medtr6g023340	'20.1.7'	'stress.biotic.PR-proteins'	hydrolase activity
Medtr6g034380	'20.1.7'	'stress.biotic.PR-proteins'	defense response to fungus
Medtr6g034410	'20.1.7'	'stress.biotic.PR-proteins'	defense response to fungus
Medtr6g034470	'20.1.7'	'stress.biotic.PR-proteins'	defense response to fungus
Medtr6g036500	'20.1.7'	'stress.biotic.PR-proteins'	putative; FUNCTIONS IN: transmembrane receptor activity
Medtr6g038700	'20.1.7'	'stress.biotic.PR-proteins'	defense response to fungus
Medtr6g038790	'20.1.7'	'stress.biotic.PR-proteins'	defense response to fungus
Medtr6g038940	'20.1.7'	'stress.biotic.PR-proteins'	defense response to fungus
Medtr6g046440	'20.1.7'	'stress.biotic.PR-proteins'	defense response; LOCATED IN: endomembrane system; EXPRESSED IN: 23 plant structures; EXPRESSED DURING: 14 growth stages; CONTAINS InterPro DOMAIN/s: Leucine-rich repeat-containing protein (InterPro:IPR015766)
Medtr6g047450	'20.1.7'	'stress.biotic.PR-proteins'	defense response; LOCATED IN: endomembrane system; EXPRESSED IN: 23 plant structures; EXPRESSED DURING: 14 growth stages; CONTAINS InterPro DOMAIN/s: Leucine-rich repeat-containing protein (InterPro:IPR015766)
Medtr6g051800	'20.1.7'	'stress.biotic.PR-proteins'	defense response to fungus
Medtr6g071925	'20.1.7'	'stress.biotic.PR-proteins'	putative; FUNCTIONS IN: transmembrane receptor activity
Medtr6g072290	'20.1.7'	'stress.biotic.PR-proteins'	putative; FUNCTIONS IN: transmembrane receptor activity
Medtr6g072780	'20.1.7'	'stress.biotic.PR-proteins'	putative; FUNCTIONS IN: transmembrane receptor activity
Medtr6g074620	'20.1.7'	'stress.biotic.PR-proteins'	putative; FUNCTIONS IN: transmembrane receptor activity
Medtr6g075960	'20.1.7'	'stress.biotic.PR-proteins'	nucleoside-triphosphatase activity
Medtr6g077640	'20.1.7'	'stress.biotic.PR-proteins'	putative; FUNCTIONS IN: transmembrane receptor activity
Medtr6g078480	'20.1.7'	'stress.biotic.PR-proteins'	putative; FUNCTIONS IN: transmembrane receptor activity
Medtr6g079140	'20.1.7'	'stress.biotic.PR-proteins'	putative; FUNCTIONS IN: transmembrane receptor activity
Medtr7g014430	'20.1.7'	'stress.biotic.PR-proteins'	defense response to fungus
Medtr8g012080	'20.1.7'	'stress.biotic.PR-proteins'	ATP binding; INVOLVED IN: signal transduction
Medtr8g020350	'20.1.7'	'stress.biotic.PR-proteins'	nucleoside-triphosphatase activity
Medtr8g028800	'20.1.7'	'stress.biotic.PR-proteins'	putative; FUNCTIONS IN: transmembrane receptor activity
Medtr8g030860	'20.1.7'	'stress.biotic.PR-proteins'	defense response; LOCATED IN: endomembrane system; EXPRESSED IN: 23 plant structures; EXPRESSED DURING: 14 growth stages; CONTAINS InterPro DOMAIN/s: Leucine-rich repeat-containing protein (InterPro:IPR015766)
Medtr8g040925	'20.1.7'	'stress.biotic.PR-proteins'	defense response to fungus
Medtr8g041150	'20.1.7'	'stress.biotic.PR-proteins'	defense response to fungus
Medtr8g041190	'20.1.7'	'stress.biotic.PR-proteins'	defense response to fungus
Medtr8g042650	'20.1.7'	'stress.biotic.PR-proteins'	ATP binding; INVOLVED IN: signal transduction
Medtr8g079520	'20.1.7'	'stress.biotic.PR-proteins'	defense response; CONTAINS InterPro DOMAIN/s: NB-ARC (InterPro:IPR002182)
Medtr8g088970	'20.1.7'	'stress.biotic.PR-proteins'	defense response to fungus
Medtr8g089000	'20.1.7'	'stress.biotic.PR-proteins'	defense response to fungus
Medtr8g090305	'20.1.7'	'stress.biotic.PR-proteins'	nucleoside-triphosphatase activity
Medtr8g470380	'20.1.7'	'stress.biotic.PR-proteins'	with more than 85% a.a. identity. It has a broad expression pattern and is involved in vascular strand development in the leaf
Medtr6g078100	'20.1.7.6.1'	'stress.biotic.PR-proteins.proteinase inhibitors.trypsin inhibitor'	cell wall; EXPRESSED IN: 17 plant structures; EXPRESSED DURING: 13 growth stages; CONTAINS InterPro DOMAIN/s: Proteinase inhibitor I3
Medtr8g021230	'20.1.7.6.1'	'stress.biotic.PR-proteins.proteinase inhibitors.trypsin inhibitor'	type A (InterPro:IPR002035); BEST Arabidopsis thaliana protein match is: inter-alpha-trypsin inhibitor heavy chain-related (TAIR:AT1G19110.1); Has 1407 Blast hits to 1406 proteins in 307 species: Archae - 6; Bacteria - 522; Metazoa - 484; Fungi - 59; Plants - 110; Viruses - 0; Other Eukaryotes - 226 (source: NCBI BLink). & (gnl|cdd|29234 : 190.0) no description available & (reliability: 1168.0) &…
Medtr2g018860	'20.2'	'stress.abiotic'	plant homologs of mammalian regulators of apoptosis. Plant BAG proteins are multi-functional and remarkably similar to their animal counterparts
Medtr3g087950	'20.2'	'stress.abiotic'	EC 2.3.2.2) that is located in vascular tissues (predominantly phloem) of leaves and is involved in the degradation of glutathione. The encoded enzyme also mitigates oxidative stress by metabolizing GSSG (oxidized form of GSH - glutathione) in the apoplast.; gamma-glutamyl transpeptidase 1 (GGT1); FUNCTIONS IN: gamma-glutamyltransferase activity
Medtr3g107393	'20.2'	'stress.abiotic'	N-terminal (InterPro:IPR004331); BEST Arabidopsis thaliana protein match is: SPX domain gene 1 (TAIR:AT5G20150.1); Has 1206 Blast hits to 1202 proteins in 209 species: Archae - 0; Bacteria - 6; Metazoa - 245; Fungi - 512; Plants - 320; Viruses - 0; Other Eukaryotes - 123 (source: NCBI BLink). & (gnl|cdd|36376 : 180.0) no description available & (gnl|cdd|66759 : 105.0) no description available & (…
Medtr4g011370	'20.2'	'stress.abiotic'	DNA photolyase
Medtr4g086410	'20.2'	'stress.abiotic'	binding
Medtr4g114550	'20.2'	'stress.abiotic'	N-terminal (InterPro:IPR004331); BEST Arabidopsis thaliana protein match is: SPX domain gene 1 (TAIR:AT5G20150.1); Has 1206 Blast hits to 1202 proteins in 209 species: Archae - 0; Bacteria - 6; Metazoa - 245; Fungi - 512; Plants - 320; Viruses - 0; Other Eukaryotes - 123 (source: NCBI BLink). & (gnl|cdd|36376 : 215.0) no description available & (gnl|cdd|66759 : 120.0) no description available & (…
Medtr5g092080	'20.2'	'stress.abiotic'	especially singlet oxygen
Medtr6g007763	'20.2'	'stress.abiotic'	Haem peroxidase
Medtr8g091710	'20.2'	'stress.abiotic'	chloroplast envelope; EXPRESSED IN: 22 plant structures; EXPRESSED DURING: 13 growth stages; CONTAINS InterPro DOMAIN/s: ABC-1 (InterPro:IPR004147)
Medtr0027s0230	'20.2.1'	'stress.abiotic.heat'	HSP20-like chaperone (InterPro:IPR008978); BEST Arabidopsis thaliana protein match is: HSP20-like chaperones superfamily protein (TAIR:AT1G07400.1); Has 6873 Blast hits to 6873 proteins in 1575 species: Archae - 184; Bacteria - 4083; Metazoa - 80; Fungi - 309; Plants - 1622; Viruses - 0; Other Eukaryotes - 595 (source: NCBI BLink). & (gnl|cdd|35929 : 85.2) no description available & (gnl|cdd|8443…
Medtr1g025430	'20.2.1'	'stress.abiotic.heat'	an ER-resident HSP90-like protein and is involved in regulation of meristem size and organization. Single and double mutant analyses suggest that SHD may be required for the correct folding and/or complex formation of CLV proteins. Lines carrying recessive mutations in this locus exhibits expanded shoot meristems
Medtr1g029470	'20.2.1'	'stress.abiotic.heat'	heat shock protein binding; INVOLVED IN: protein folding; LOCATED IN: cellular_component unknown; EXPRESSED IN: 22 plant structures; EXPRESSED DURING: 12 growth stages; CONTAINS InterPro DOMAIN/s: Molecular chaperone
Medtr1g038430	'20.2.1'	'stress.abiotic.heat'	heat shock protein binding; INVOLVED IN: protein folding; LOCATED IN: chloroplast; EXPRESSED IN: 21 plant structures; EXPRESSED DURING: 11 growth stages; CONTAINS InterPro DOMAIN/s: Molecular chaperone
Medtr1g041565	'20.2.1'	'stress.abiotic.heat'	mitochondrion
Medtr1g060440	'20.2.1'	'stress.abiotic.heat'	heat shock protein binding; INVOLVED IN: protein folding; LOCATED IN: cellular_component unknown; EXPRESSED IN: 15 plant structures; EXPRESSED DURING: 8 growth stages; CONTAINS InterPro DOMAIN/s: Molecular chaperone
Medtr1g081970	'20.2.1'	'stress.abiotic.heat'	heat shock protein binding; INVOLVED IN: protein folding; LOCATED IN: cellular_component unknown; EXPRESSED IN: 19 plant structures; EXPRESSED DURING: 8 growth stages; CONTAINS InterPro DOMAIN/s: Molecular chaperone
Medtr1g082670	'20.2.1'	'stress.abiotic.heat'	HSP20-like chaperone (InterPro:IPR008978); BEST Arabidopsis thaliana protein match is: HSP20-like chaperones superfamily protein (TAIR:AT1G54840.1); Has 80 Blast hits to 80 proteins in 15 species: Archae - 0; Bacteria - 9; Metazoa - 0; Fungi - 0; Plants - 71; Viruses - 0; Other Eukaryotes - 0 (source: NCBI BLink). & (reliability: 406.0) & (original description: no original description)'
Medtr1g087270	'20.2.1'	'stress.abiotic.heat'	heat shock protein binding; INVOLVED IN: protein folding; LOCATED IN: cellular_component unknown; EXPRESSED IN: leaf; CONTAINS InterPro DOMAIN/s: Tetratricopeptide-like helical (InterPro:IPR011990)
Medtr2g009520	'20.2.1'	'stress.abiotic.heat'	heat shock protein
Medtr2g022900	'20.2.1'	'stress.abiotic.heat'	HSP20-like chaperone (InterPro:IPR008978); BEST Arabidopsis thaliana protein match is: HSP20-like chaperones superfamily protein (TAIR:AT1G53540.1); Has 2331 Blast hits to 2331 proteins in 523 species: Archae - 47; Bacteria - 802; Metazoa - 2; Fungi - 44; Plants - 1239; Viruses - 0; Other Eukaryotes - 197 (source: NCBI BLink). & (reliability: 240.0) & (original description: no original descriptio…
Medtr2g038200	'20.2.1'	'stress.abiotic.heat'	N-terminal (InterPro:IPR004176); BEST Arabidopsis thaliana protein match is: Clp amino terminal domain-containing protein (TAIR:AT5G57130.1); Has 2205 Blast hits to 2155 proteins in 769 species: Archae - 7; Bacteria - 1557; Metazoa - 28; Fungi - 31; Plants - 337; Viruses - 0; Other Eukaryotes - 245 (source: NCBI BLink). & (gnl|cdd|36269 : 441.0) no description available & (reliability: 1132.0) & …
Medtr2g040160	'20.2.1'	'stress.abiotic.heat'	mitochondrion
Medtr2g040350	'20.2.1'	'stress.abiotic.heat'	mitochondrion
Medtr2g040370	'20.2.1'	'stress.abiotic.heat'	mitochondrion
Medtr3g070850	'20.2.1'	'stress.abiotic.heat'	T
Medtr3g081170	'20.2.1'	'stress.abiotic.heat'	chloroplast; EXPRESSED IN: 24 plant structures; EXPRESSED DURING: 13 growth stages; CONTAINS InterPro DOMAIN/s: Heat shock protein 70
Medtr3g086050	'20.2.1'	'stress.abiotic.heat'	HSP20-like chaperone (InterPro:IPR008978); BEST Arabidopsis thaliana protein match is: HSP20-like chaperones superfamily protein (TAIR:AT5G51440.1); Has 6158 Blast hits to 6158 proteins in 1414 species: Archae - 225; Bacteria - 3528; Metazoa - 23; Fungi - 170; Plants - 1466; Viruses - 0; Other Eukaryotes - 746 (source: NCBI BLink). & (gnl|cdd|84439 : 86.8) no description available & (reliability:…
Medtr3g104550	'20.2.1'	'stress.abiotic.heat'	transcription activator activity
Medtr3g104980	'20.2.1'	'stress.abiotic.heat'	chloroplast; CONTAINS InterPro DOMAIN/s: Heat shock protein DnaJ
Medtr3g464150	'20.2.1'	'stress.abiotic.heat'	T
Medtr4g032805	'20.2.1'	'stress.abiotic.heat'	heat shock protein
Medtr4g092920	'20.2.1'	'stress.abiotic.heat'	mitochondrial precursor - Pisum sativum (Garden pea) & (at5g09590 : 1024.0) heat shock protein 70 (Hsc70-5); nuclear; mitochondrial HSO70 2 (MTHSC70-2); FUNCTIONS IN: ATP binding; INVOLVED IN: protein folding
Medtr4g127290	'20.2.1'	'stress.abiotic.heat'	N-terminal (InterPro:IPR004176); BEST Arabidopsis thaliana protein match is: Clp amino terminal domain-containing protein (TAIR:AT5G57130.1); Has 2205 Blast hits to 2155 proteins in 769 species: Archae - 7; Bacteria - 1557; Metazoa - 28; Fungi - 31; Plants - 337; Viruses - 0; Other Eukaryotes - 245 (source: NCBI BLink). & (gnl|cdd|36269 : 193.0) no description available & (reliability: 578.0) & (…
Medtr4g129230	'20.2.1'	'stress.abiotic.heat'	AAA-2 (InterPro:IPR013093); BEST Arabidopsis thaliana protein match is: Double Clp-N motif-containing P-loop nucleoside triphosphate hydrolases superfamily protein (TAIR:AT4G30350.1); Has 16657 Blast hits to 15152 proteins in 2785 species: Archae - 23; Bacteria - 13282; Metazoa - 28; Fungi - 336; Plants - 548; Viruses - 0; Other Eukaryotes - 2440 (source: NCBI BLink). & (gnl|cdd|36269 : 536.0) no…
Medtr5g065160	'20.2.1'	'stress.abiotic.heat'	heat shock protein binding
Medtr5g065860	'20.2.1'	'stress.abiotic.heat'	heat shock protein binding; INVOLVED IN: protein folding; LOCATED IN: cellular_component unknown; EXPRESSED IN: 20 plant structures; EXPRESSED DURING: 13 growth stages; CONTAINS InterPro DOMAIN/s: Molecular chaperone
Medtr5g091960	'20.2.1'	'stress.abiotic.heat'	HSP20-like chaperone (InterPro:IPR008978); BEST Arabidopsis thaliana protein match is: heat shock protein 17.6A (TAIR:AT5G12030.1); Has 3590 Blast hits to 3590 proteins in 1004 species: Archae - 36; Bacteria - 2284; Metazoa - 1; Fungi - 156; Plants - 751; Viruses - 0; Other Eukaryotes - 362 (source: NCBI BLink). & (reliability: 348.0) & (original description: no original description)'
Medtr5g097320	'20.2.1'	'stress.abiotic.heat'	response to stress; LOCATED IN: mitochondrion
Medtr6g013660	'20.2.1'	'stress.abiotic.heat'	the organ boundary region
Medtr6g033760	'20.2.1'	'stress.abiotic.heat'	response to cold
Medtr6g033800	'20.2.1'	'stress.abiotic.heat'	response to cold
Medtr6g033805	'20.2.1'	'stress.abiotic.heat'	mitochondrion
Medtr6g033820	'20.2.1'	'stress.abiotic.heat'	mitochondrion
Medtr6g033850	'20.2.1'	'stress.abiotic.heat'	response to cold
Medtr6g033855	'20.2.1'	'stress.abiotic.heat'	response to cold
Medtr6g033870	'20.2.1'	'stress.abiotic.heat'	mitochondrion
Medtr6g033955	'20.2.1'	'stress.abiotic.heat'	mitochondrion
Medtr6g034005	'20.2.1'	'stress.abiotic.heat'	response to cold
Medtr6g478190	'20.2.1'	'stress.abiotic.heat'	HSP20-like chaperone (InterPro:IPR008978); BEST Arabidopsis thaliana protein match is: HSP20-like chaperones superfamily protein (TAIR:AT2G27140.1); Has 638 Blast hits to 638 proteins in 68 species: Archae - 0; Bacteria - 6; Metazoa - 0; Fungi - 34; Plants - 583; Viruses - 0; Other Eukaryotes - 15 (source: NCBI BLink). & (reliability: 177.2) & (original description: no original description)'
Medtr7g099680	'20.2.1'	'stress.abiotic.heat'	response to karrikin
Medtr7g101070	'20.2.1'	'stress.abiotic.heat'	binding; INVOLVED IN: protein folding; LOCATED IN: endoplasmic reticulum
Medtr7g109340	'20.2.1'	'stress.abiotic.heat'	heat shock protein binding; INVOLVED IN: protein folding
Medtr7g112360	'20.2.1'	'stress.abiotic.heat'	response to cyclopentenone; LOCATED IN: cellular_component unknown; EXPRESSED IN: 23 plant structures; EXPRESSED DURING: 15 growth stages; CONTAINS InterPro DOMAIN/s: Molecular chaperone
Medtr7g113530	'20.2.1'	'stress.abiotic.heat'	heat shock protein
Medtr8g022310	'20.2.1'	'stress.abiotic.heat'	heat shock protein
Medtr8g068845	'20.2.1'	'stress.abiotic.heat'	heat shock protein binding; INVOLVED IN: protein folding; LOCATED IN: cellular_component unknown; EXPRESSED IN: 22 plant structures; EXPRESSED DURING: 13 growth stages; CONTAINS InterPro DOMAIN/s: Molecular chaperone
Medtr8g099795	'20.2.1'	'stress.abiotic.heat'	response to cadmium ion
Medtr8g099945	'20.2.1'	'stress.abiotic.heat'	response to cadmium ion
Medtr1g034340	'20.2.2'	'stress.abiotic.cold'	T
Medtr1g034350	'20.2.2'	'stress.abiotic.cold'	water deprivation
Medtr2g034200	'20.2.2'	'stress.abiotic.cold'	response to stress; LOCATED IN: plasma membrane; EXPRESSED IN: 24 plant structures; EXPRESSED DURING: 15 growth stages; CONTAINS InterPro DOMAIN/s: UspA (InterPro:IPR006016)
Medtr2g088770	'20.2.2'	'stress.abiotic.cold'	heme binding; INVOLVED IN: response to oxidative stress
Medtr4g068510	'20.2.2'	'stress.abiotic.cold'	T
Medtr0019s0120	'20.2.3'	'stress.abiotic.drought/salt'	methyltransferase putative (InterPro:IPR004159); BEST Arabidopsis thaliana protein match is: S-adenosyl-L-methionine-dependent methyltransferases superfamily protein (TAIR:AT4G00750.1); Has 1101 Blast hits to 1086 proteins in 99 species: Archae - 0; Bacteria - 128; Metazoa - 0; Fungi - 2; Plants - 963; Viruses - 0; Other Eukaryotes - 8 (source: NCBI BLink). & (gnl|cdd|66793 : 792.0) no descriptio…
Medtr1g008500	'20.2.3'	'stress.abiotic.drought/salt'	response to salt stress
Medtr1g022255	'20.2.3'	'stress.abiotic.drought/salt'	methyltransferase putative (InterPro:IPR004159); BEST Arabidopsis thaliana protein match is: S-adenosyl-L-methionine-dependent methyltransferases superfamily protein (TAIR:AT5G64030.1); Has 8058 Blast hits to 6201 proteins in 616 species: Archae - 19; Bacteria - 712; Metazoa - 2431; Fungi - 867; Plants - 1254; Viruses - 124; Other Eukaryotes - 2651 (source: NCBI BLink). & (gnl|cdd|66793 : 631.0) …
Medtr1g075900	'20.2.3'	'stress.abiotic.drought/salt'	plasma membrane; EXPRESSED IN: 26 plant structures; EXPRESSED DURING: 15 growth stages; CONTAINS InterPro DOMAIN/s: Protein of unknown function DUF248
Medtr1g107555	'20.2.3'	'stress.abiotic.drought/salt'	copper ion binding; INVOLVED IN: cellular response to phosphate starvation
Medtr1g114250	'20.2.3'	'stress.abiotic.drought/salt'	plasma membrane
Medtr1g442840	'20.2.3'	'stress.abiotic.drought/salt'	plasma membrane
Medtr2g018780	'20.2.3'	'stress.abiotic.drought/salt'	chloroplast
Medtr2g035070	'20.2.3'	'stress.abiotic.drought/salt'	T
Medtr3g023110	'20.2.3'	'stress.abiotic.drought/salt'	light stress and treatment with plant-growth-promoting rhizobacteria (Paenibacillus polymyxa)
Medtr3g040370	'20.2.3'	'stress.abiotic.drought/salt'	membrane; EXPRESSED IN: 25 plant structures; EXPRESSED DURING: 15 growth stages; CONTAINS InterPro DOMAIN/s: Protein of unknown function DUF248
Medtr3g074780	'20.2.3'	'stress.abiotic.drought/salt'	a putative methyltransferase with an essential role in cell adhesion and coordinated plant development.; TUMOROUS SHOOT DEVELOPMENT 2 (TSD2); FUNCTIONS IN: methyltransferase activity; INVOLVED IN: shoot development
Medtr3g109490	'20.2.3'	'stress.abiotic.drought/salt'	response to salt stress
Medtr4g098890	'20.2.3'	'stress.abiotic.drought/salt'	plasma membrane
Medtr4g132570	'20.2.3'	'stress.abiotic.drought/salt'	T
Medtr5g026930	'20.2.3'	'stress.abiotic.drought/salt'	methyltransferase putative (InterPro:IPR004159); BEST Arabidopsis thaliana protein match is: S-adenosyl-L-methionine-dependent methyltransferases superfamily protein (TAIR:AT1G31850.2); Has 1146 Blast hits to 1130 proteins in 105 species: Archae - 6; Bacteria - 157; Metazoa - 0; Fungi - 3; Plants - 960; Viruses - 0; Other Eukaryotes - 20 (source: NCBI BLink). & (gnl|cdd|66793 : 724.0) no descript…
Medtr5g040360	'20.2.3'	'stress.abiotic.drought/salt'	membrane; EXPRESSED IN: 25 plant structures; EXPRESSED DURING: 15 growth stages; CONTAINS InterPro DOMAIN/s: Protein of unknown function DUF248
Medtr5g042560	'20.2.3'	'stress.abiotic.drought/salt'	membrane; EXPRESSED IN: 23 plant structures; EXPRESSED DURING: 13 growth stages; CONTAINS InterPro DOMAIN/s: Protein of unknown function DUF221 (InterPro:IPR003864); BEST Arabidopsis thaliana protein match is: hypothetical protein 1 (TAIR:AT3G01100.1). & (gnl|cdd|36349 : 488.0) no description available & (gnl|cdd|66403 : 322.0) no description available & (ipr003864 : 196.16602) Domain of unknown …
Medtr5g064080	'20.2.3'	'stress.abiotic.drought/salt'	a putative methyltransferase with an essential role in cell adhesion and coordinated plant development.; TUMOROUS SHOOT DEVELOPMENT 2 (TSD2); FUNCTIONS IN: methyltransferase activity; INVOLVED IN: shoot development
Medtr5g086610	'20.2.3'	'stress.abiotic.drought/salt'	T
Medtr6g077750	'20.2.3'	'stress.abiotic.drought/salt'	a subunit of oligosaccharyltransferase.; staurosporin and temperature sensitive 3-like b (STT3B); FUNCTIONS IN: oligosaccharyl transferase activity; INVOLVED IN: protein amino acid glycosylation; LOCATED IN: endoplasmic reticulum
Medtr7g006060	'20.2.3'	'stress.abiotic.drought/salt'	methyltransferase putative (InterPro:IPR004159); BEST Arabidopsis thaliana protein match is: S-adenosyl-L-methionine-dependent methyltransferases superfamily protein (TAIR:AT4G00750.1); Has 1253 Blast hits to 1210 proteins in 135 species: Archae - 14; Bacteria - 180; Metazoa - 5; Fungi - 11; Plants - 985; Viruses - 0; Other Eukaryotes - 58 (source: NCBI BLink). & (ipr004159 : 482.75443) Putative …
Medtr7g076150	'20.2.3'	'stress.abiotic.drought/salt'	methyltransferase putative (InterPro:IPR004159); BEST Arabidopsis thaliana protein match is: S-adenosyl-L-methionine-dependent methyltransferases superfamily protein (TAIR:AT4G10440.1); Has 1057 Blast hits to 1046 proteins in 101 species: Archae - 2; Bacteria - 148; Metazoa - 0; Fungi - 0; Plants - 904; Viruses - 0; Other Eukaryotes - 3 (source: NCBI BLink). & (gnl|cdd|66793 : 695.0) no descripti…
Medtr7g090630	'20.2.3'	'stress.abiotic.drought/salt'	light stress and treatment with plant-growth-promoting rhizobacteria (Paenibacillus polymyxa)
Medtr8g055840	'20.2.3'	'stress.abiotic.drought/salt'	membrane; EXPRESSED IN: 25 plant structures; EXPRESSED DURING: 15 growth stages; CONTAINS InterPro DOMAIN/s: Protein of unknown function DUF248
Medtr8g093880	'20.2.3'	'stress.abiotic.drought/salt'	methyltransferase putative (InterPro:IPR004159); BEST Arabidopsis thaliana protein match is: S-adenosyl-L-methionine-dependent methyltransferases superfamily protein (TAIR:AT1G29470.2); Has 79879 Blast hits to 39720 proteins in 2025 species: Archae - 377; Bacteria - 14382; Metazoa - 24757; Fungi - 8186; Plants - 4300; Viruses - 653; Other Eukaryotes - 27224 (source: NCBI BLink). & (gnl|cdd|66793 …
Medtr8g100075	'20.2.3'	'stress.abiotic.drought/salt'	methyltransferase putative (InterPro:IPR004159); BEST Arabidopsis thaliana protein match is: S-adenosyl-L-methionine-dependent methyltransferases superfamily protein (TAIR:AT4G10440.1); Has 1106 Blast hits to 1098 proteins in 101 species: Archae - 5; Bacteria - 135; Metazoa - 1; Fungi - 2; Plants - 950; Viruses - 0; Other Eukaryotes - 13 (source: NCBI BLink). & (gnl|cdd|66793 : 774.0) no descript…
Medtr8g432620	'20.2.3'	'stress.abiotic.drought/salt'	methyltransferase putative (InterPro:IPR004159); BEST Arabidopsis thaliana protein match is: S-adenosyl-L-methionine-dependent methyltransferases superfamily protein (TAIR:AT4G10440.1); Has 1057 Blast hits to 1046 proteins in 101 species: Archae - 2; Bacteria - 148; Metazoa - 0; Fungi - 0; Plants - 904; Viruses - 0; Other Eukaryotes - 3 (source: NCBI BLink). & (gnl|cdd|66793 : 710.0) no descripti…
Medtr8g432680	'20.2.3'	'stress.abiotic.drought/salt'	methyltransferase putative (InterPro:IPR004159); BEST Arabidopsis thaliana protein match is: S-adenosyl-L-methionine-dependent methyltransferases superfamily protein (TAIR:AT2G45750.1); Has 1807 Blast hits to 1807 proteins in 277 species: Archae - 0; Bacteria - 0; Metazoa - 736; Fungi - 347; Plants - 385; Viruses - 0; Other Eukaryotes - 339 (source: NCBI BLink). & (gnl|cdd|66793 : 787.0) no descr…
Medtr8g445170	'20.2.3'	'stress.abiotic.drought/salt'	response to salt stress
Medtr3g112160	'20.2.4'	'stress.abiotic.touch/wounding'	UvrB/UvrC protein (InterPro:IPR001943); BEST Arabidopsis thaliana protein match is: Wound-responsive family protein (TAIR:AT1G19660.2); Has 843 Blast hits to 843 proteins in 291 species: Archae - 44; Bacteria - 501; Metazoa - 0; Fungi - 0; Plants - 105; Viruses - 0; Other Eukaryotes - 193 (source: NCBI BLink). & (reliability: 868.0) & (original description: no original description)'
Medtr4g045990	'20.2.4'	'stress.abiotic.touch/wounding'	T
Medtr7g108940	'20.2.4'	'stress.abiotic.touch/wounding'	HD subdomain (InterPro:IPR006674)
Medtr3g096780	'20.2.5'	'stress.abiotic.light'	guanyl-nucleotide exchange factor activity; INVOLVED IN: response to UV
Medtr8g094410	'20.2.5'	'stress.abiotic.light'	guanyl-nucleotide exchange factor activity; INVOLVED IN: response to UV
Medtr1g016480	'20.2.99'	'stress.abiotic.unspecified'	T
Medtr1g031640	'20.2.99'	'stress.abiotic.unspecified'	defense response; LOCATED IN: cellular_component unknown; EXPRESSED IN: 9 plant structures; EXPRESSED DURING: LP.04 four leaves visible
Medtr1g060120	'20.2.99'	'stress.abiotic.unspecified'	nutrient reservoir activity; INVOLVED IN: biological_process unknown; LOCATED IN: endomembrane system
Medtr1g102940	'20.2.99'	'stress.abiotic.unspecified'	T
Medtr1g112200	'20.2.99'	'stress.abiotic.unspecified'	nutrient reservoir activity; INVOLVED IN: biological_process unknown; LOCATED IN: endomembrane system
Medtr2g041550	'20.2.99'	'stress.abiotic.unspecified'	suggesting some kind of circadian regulation.; germin 3 (GER3); INVOLVED IN: response to cold
Medtr3g051110	'20.2.99'	'stress.abiotic.unspecified'	T
Medtr3g073990	'20.2.99'	'stress.abiotic.unspecified'	expressed in leaves
Medtr4g010340	'20.2.99'	'stress.abiotic.unspecified'	RmlC-type (InterPro:IPR011051)
Medtr4g017810	'20.2.99'	'stress.abiotic.unspecified'	plant homologs of mammalian regulators of apoptosis. BD domain of ATBAG4 had highest similarity to human DB domain of BAG protein. Plant BAG proteins are multi-functional and remarkably similar to their animal counterparts
Medtr4g088735	'20.2.99'	'stress.abiotic.unspecified'	petal differentiation and expansion stage; CONTAINS InterPro DOMAIN/s: Pollen Ole e 1 allergen/extensin (InterPro:IPR006041); BEST Arabidopsis thaliana protein match is: arabinogalactan protein 31 (TAIR:AT1G28290.1); Has 194 Blast hits to 194 proteins in 25 species: Archae - 0; Bacteria - 0; Metazoa - 0; Fungi - 0; Plants - 194; Viruses - 0; Other Eukaryotes - 0 (source: NCBI BLink). & (gnl|cdd|8…
Medtr4g109880	'20.2.99'	'stress.abiotic.unspecified'	leaf whorl; EXPRESSED DURING: E expanded cotyledon stage; CONTAINS InterPro DOMAIN/s: UspA (InterPro:IPR006016)
Medtr5g018755	'20.2.99'	'stress.abiotic.unspecified'	Antigen 5
Medtr5g035010	'20.2.99'	'stress.abiotic.unspecified'	defense response; EXPRESSED IN: 22 plant structures; EXPRESSED DURING: 14 growth stages; CONTAINS InterPro DOMAIN/s: Bet v I allergen (InterPro:IPR000916); BEST Arabidopsis thaliana protein match is: MLP-like protein 28 (TAIR:AT1G70830.3). & (gnl|cdd|84754 : 121.0) no description available & (reliability: 328.0) & (original description: no original description)'
Medtr5g036570	'20.2.99'	'stress.abiotic.unspecified'	nutrient reservoir activity; INVOLVED IN: biological_process unknown; LOCATED IN: apoplast; EXPRESSED IN: inflorescence meristem
Medtr6g015995	'20.2.99'	'stress.abiotic.unspecified'	T
Medtr7g016950	'20.2.99'	'stress.abiotic.unspecified'	T
Medtr8g007300	'20.2.99'	'stress.abiotic.unspecified'	nutrient reservoir activity; INVOLVED IN: response to salt stress; LOCATED IN: endomembrane system
Medtr8g020590	'20.2.99'	'stress.abiotic.unspecified'	RmlC-type (InterPro:IPR011051)
Medtr8g045560	'20.2.99'	'stress.abiotic.unspecified'	defense response; LOCATED IN: cellular_component unknown; EXPRESSED IN: 8 plant structures; EXPRESSED DURING: 6 growth stages; CONTAINS InterPro DOMAIN/s: Bet v I allergen (InterPro:IPR000916); BEST Arabidopsis thaliana protein match is: Polyketide cyclase/dehydrase and lipid transport superfamily protein (TAIR:AT5G28000.1); Has 1807 Blast hits to 1807 proteins in 277 species: Archae - 0; Bacteri…
Medtr1g050322	'21.1'	'redox.thioredoxin'	Thioredoxin
Medtr1g053160	'21.1'	'redox.thioredoxin'	chloroplast; EXPRESSED IN: 23 plant structures; EXPRESSED DURING: 13 growth stages; CONTAINS InterPro DOMAIN/s: Pyridine nucleotide-disulphide oxidoreductase
Medtr1g114290	'21.1'	'redox.thioredoxin'	chloroplast stroma; EXPRESSED IN: 22 plant structures; EXPRESSED DURING: 13 growth stages; CONTAINS InterPro DOMAIN/s: Thioredoxin fold (InterPro:IPR012335)
Medtr2g079420	'21.1'	'redox.thioredoxin'	positive regulation of catalytic activity; LOCATED IN: thylakoid
Medtr2g082590	'21.1'	'redox.thioredoxin'	thioredoxin in which the second cysteine of the redox site is replaced by a serine
Medtr3g074230	'21.1'	'redox.thioredoxin'	heat shock protein
Medtr3g089065	'21.1'	'redox.thioredoxin'	chloroplast precursor (TRX-M) - Pisum sativum (Garden pea) & (at3g15360 : 158.0) encodes a prokaryotic thioredoxin; thioredoxin M-type 4 (TRX-M4); FUNCTIONS IN: enzyme activator activity; INVOLVED IN: response to oxidative stress
Medtr3g098520	'21.1'	'redox.thioredoxin'	metal ion binding; EXPRESSED IN: 22 plant structures; EXPRESSED DURING: 13 growth stages; CONTAINS InterPro DOMAIN/s: Rubredoxin-type Fe(Cys)4 protein (InterPro:IPR004039); BEST Arabidopsis thaliana protein match is: rubredoxin family protein (TAIR:AT5G17170.1); Has 30201 Blast hits to 17322 proteins in 780 species: Archae - 12; Bacteria - 1396; Metazoa - 17338; Fungi - 3422; Plants - 5037; Virus…
Medtr3g101740	'21.1'	'redox.thioredoxin'	Thioredoxin
Medtr4g085880	'21.1'	'redox.thioredoxin'	Thioredoxin
Medtr4g094690	'21.1'	'redox.thioredoxin'	Thioredoxin-like subdomain (InterPro:IPR006662)
Medtr5g021180	'21.1'	'redox.thioredoxin'	acting on sulfur group of donors
Medtr6g008220	'21.1'	'redox.thioredoxin'	chloroplast precursor (EC 1.18.-.-) (FTR-C) - Glycine max (Soybean) & (at2g04700 : 220.0) ferredoxin thioredoxin reductase catalytic beta chain family protein; FUNCTIONS IN: ferredoxin:thioredoxin reductase activity
Medtr6g092700	'21.1'	'redox.thioredoxin'	and poor activity towards the chloroplast NADP-malate dehydrogenase.; atypical CYS HIS rich thioredoxin 2 (ACHT2); FUNCTIONS IN: oxidoreductase activity
Medtr7g080250	'21.1'	'redox.thioredoxin'	chloroplast precursor (TRX-F) - Pisum sativum (Garden pea) & (at5g16400 : 184.0) Encodes an f-type thioredoxin (Trx-f2) localized in chloroplast stroma.; thioredoxin F2 (TRXF2); FUNCTIONS IN: enzyme activator activity; INVOLVED IN: positive regulation of catalytic activity; LOCATED IN: chloroplast stroma
Medtr7g093490	'21.1'	'redox.thioredoxin'	Thioredoxin
Medtr8g059015	'21.1'	'redox.thioredoxin'	positive regulation of catalytic activity; LOCATED IN: thylakoid
Medtr8g107460	'21.1'	'redox.thioredoxin'	oxidoreductase activity
Medtr2g094180	'21.1.1'	'redox.thioredoxin.PDIL'	a member of a multigene family within the thioredoxin (TRX) superfamily. Unlike several other PDI family members
Medtr2g101880	'21.1.1'	'redox.thioredoxin.PDIL'	a member of a multigene family within the thioredoxin (TRX) superfamily. Unlike several other PDI family members
Medtr3g088220	'21.1.1'	'redox.thioredoxin.PDIL'	a member of a multigene family within the thioredoxin (TRX) superfamily; isoform contains non-consensus GA donor splice site at intron 9. Transcript levels for this gene are up-regulated in response to three different chemical inducers of ER stress (dithiothreitol
Medtr4g059450	'21.1.1'	'redox.thioredoxin.PDIL'	a member of a multigene family within the thioredoxin (TRX) superfamily. Unlike several other PDI family members
Medtr5g084930	'21.1.1'	'redox.thioredoxin.PDIL'	a member of a multigene family within the thioredoxin (TRX) superfamily. Transcript levels for this gene are up-regulated in response to three different chemical inducers of ER stress (dithiothreitol
Medtr1g034140	'21.2'	'redox.ascorbate and glutathione'	acting on paired donors
Medtr3g046760	'21.2'	'redox.ascorbate and glutathione'	eukaryote (InterPro:IPR004877)
Medtr3g081290	'21.2'	'redox.ascorbate and glutathione'	T
Medtr3g102780	'21.2'	'redox.ascorbate and glutathione'	endoplasmic reticulum membrane; EXPRESSED IN: 26 plant structures; EXPRESSED DURING: 15 growth stages; CONTAINS InterPro DOMAIN/s: Cytochrome b5
Medtr4g022350	'21.2'	'redox.ascorbate and glutathione'	heme-binding site (InterPro:IPR018506)
Medtr4g096780	'21.2'	'redox.ascorbate and glutathione'	eukaryote (InterPro:IPR004877)
Medtr5g045630	'21.2'	'redox.ascorbate and glutathione'	heme-binding site (InterPro:IPR018506)
Medtr5g053250	'21.2'	'redox.ascorbate and glutathione'	integral to membrane; EXPRESSED IN: 21 plant structures; EXPRESSED DURING: 13 growth stages; CONTAINS InterPro DOMAIN/s: Cytochrome b561
Medtr6g027160	'21.2'	'redox.ascorbate and glutathione'	; membrane-associated progesterone binding protein 3 (MAPR3); FUNCTIONS IN: heme binding; LOCATED IN: chloroplast thylakoid membrane
Medtr6g088690	'21.2'	'redox.ascorbate and glutathione'	heme-binding site (InterPro:IPR018506)
Medtr1g115500	'21.2.1'	'redox.ascorbate and glutathione.ascorbate'	apoplast
Medtr3g066060	'21.2.1'	'redox.ascorbate and glutathione.ascorbate'	chloroplast
Medtr3g078740	'21.2.1'	'redox.ascorbate and glutathione.ascorbate'	L-ascorbate oxidase activity
Medtr3g088160	'21.2.1'	'redox.ascorbate and glutathione.ascorbate'	APX2
Medtr5g064610	'21.2.1'	'redox.ascorbate and glutathione.ascorbate'	no evidence of enzymatic activity has been found.; ascorbate peroxidase 4 (APX4); FUNCTIONS IN: peroxidase activity
Medtr8g091390	'21.2.1'	'redox.ascorbate and glutathione.ascorbate'	L-ascorbate oxidase activity
Medtr1g080950	'21.2.1.1'	'redox.ascorbate and glutathione.ascorbate.GME'	5'-epimerase activity. The enzyme is involved in ascorbate biosynthesis. It catalyzes the conversion of GDP-D-mannose to GDP-L-galactose.; "GDP-D-mannose 3'
Medtr5g093390	'21.2.1.2'	'redox.ascorbate and glutathione.ascorbate.GDP-L-galactose-hexose-1-phosphate guanyltransferase'	which was shown to catalyze the transfer of GMP from GDP-galactose to a variety of hexose-1-phosphate acceptors. Recessive mutation has a reduced amount of vitamin C
Medtr1g050360	'21.2.1.5'	'redox.ascorbate and glutathione.ascorbate.L-Galactono-1	'(at3g47930 : 882.0) L-Galactono-1
Medtr1g014210	'21.2.2'	'redox.ascorbate and glutathione.glutathione'	chloroplast precursor (EC 1.11.1.12) (PHGPx) - Pisum sativum (Garden pea) & (at2g25080 : 289.0) Encodes glutathione peroxidase.; glutathione peroxidase 1 (GPX1); FUNCTIONS IN: glutathione peroxidase activity; INVOLVED IN: oxidation reduction
Medtr0026s0210	'21.3'	'redox.heme'	plasma membrane; EXPRESSED IN: 22 plant structures; EXPRESSED DURING: 14 growth stages; CONTAINS InterPro DOMAIN/s: Leghaemoglobin (InterPro:IPR001032)
Medtr2g054130	'21.3'	'redox.heme'	SOUL haem-binding protein (InterPro:IPR006917); BEST Arabidopsis thaliana protein match is: SOUL heme-binding family protein (TAIR:AT3G10130.1). & (gnl|cdd|68407 : 111.0) no description available & (ipr006917 : 102.92318) SOUL haem-binding protein & (reliability: 1038.0) & (original description: no original description)'
Medtr2g055010	'21.3'	'redox.heme'	SOUL haem-binding protein (InterPro:IPR006917); BEST Arabidopsis thaliana protein match is: SOUL heme-binding family protein (TAIR:AT3G10130.1). & (gnl|cdd|68407 : 108.0) no description available & (ipr006917 : 94.54525) SOUL haem-binding protein & (reliability: 996.0) & (original description: no original description)'
Medtr5g080400	'21.3'	'redox.heme'	Globin-like (InterPro:IPR009050)
Medtr1g015890	'21.4'	'redox.glutaredoxins'	protein disulfide oxidoreductase activity; INVOLVED IN: cell redox homeostasis; LOCATED IN: cellular_component unknown; EXPRESSED IN: 23 plant structures; EXPRESSED DURING: 13 growth stages; CONTAINS InterPro DOMAIN/s: Glutaredoxin-like
Medtr1g088920	'21.4'	'redox.glutaredoxins'	arsenate reductase (glutaredoxin) activity
Medtr1g088925	'21.4'	'redox.glutaredoxins'	arsenate reductase (glutaredoxin) activity
Medtr2g019900	'21.4'	'redox.glutaredoxins'	arsenate reductase (glutaredoxin) activity
Medtr2g019950	'21.4'	'redox.glutaredoxins'	protein disulfide oxidoreductase activity; INVOLVED IN: cell redox homeostasis; CONTAINS InterPro DOMAIN/s: Glutaredoxin-like
Medtr3g017490	'21.4'	'redox.glutaredoxins'	protein disulfide oxidoreductase activity; INVOLVED IN: cell redox homeostasis; EXPRESSED IN: 23 plant structures; EXPRESSED DURING: 15 growth stages; CONTAINS InterPro DOMAIN/s: Thioredoxin fold (InterPro:IPR012335)
Medtr6g011640	'21.4'	'redox.glutaredoxins'	protein disulfide oxidoreductase activity; INVOLVED IN: N-terminal protein myristoylation
Medtr7g090230	'21.4'	'redox.glutaredoxins'	protein disulfide oxidoreductase activity; INVOLVED IN: N-terminal protein myristoylation
Medtr7g106500	'21.4'	'redox.glutaredoxins'	protein disulfide oxidoreductase activity; INVOLVED IN: cell redox homeostasis; CONTAINS InterPro DOMAIN/s: Thioredoxin fold (InterPro:IPR012335)
Medtr7g108200	'21.4'	'redox.glutaredoxins'	arsenate reductase (glutaredoxin) activity
Medtr7g108210	'21.4'	'redox.glutaredoxins'	protein disulfide oxidoreductase activity; INVOLVED IN: cell redox homeostasis; LOCATED IN: endomembrane system; EXPRESSED IN: 8 plant structures; EXPRESSED DURING: 8 growth stages; CONTAINS InterPro DOMAIN/s: Glutaredoxin-like
Medtr7g108250	'21.4'	'redox.glutaredoxins'	arsenate reductase (glutaredoxin) activity
Medtr7g108260	'21.4'	'redox.glutaredoxins'	arsenate reductase (glutaredoxin) activity
Medtr4g124790	'21.5'	'redox.peroxiredoxin'	antioxidant activity; INVOLVED IN: cell redox homeostasis; LOCATED IN: chloroplast stromal thylakoid
Medtr6g087990	'21.5'	'redox.peroxiredoxin'	antioxidant activity; INVOLVED IN: response to cadmium ion; LOCATED IN: chloroplast
Medtr7g103610	'21.5'	'redox.peroxiredoxin'	antioxidant activity; INVOLVED IN: defense response to bacterium
Medtr1g105090	'21.5.1'	'redox.peroxiredoxin.BAS1'	antioxidant activity; INVOLVED IN: response to cold
Medtr7g105830	'21.5.1'	'redox.peroxiredoxin.BAS1'	antioxidant activity; INVOLVED IN: response to cold
Medtr1g048990	'21.6'	'redox.dismutases and catalases'	chloroplast precursor (EC 1.15.1.1) - Glycine max (Soybean) & (at5g51100 : 261.0) Fe superoxide dismutase whose mRNA levels are increased in response to exposure to UV-B.; Fe superoxide dismutase 2 (FSD2); FUNCTIONS IN: superoxide dismutase activity; INVOLVED IN: response to UV; LOCATED IN: chloroplast
Medtr3g078860	'21.6'	'redox.dismutases and catalases'	nucleoid; EXPRESSED IN: 21 plant structures; EXPRESSED DURING: 13 growth stages; CONTAINS InterPro DOMAIN/s: Manganese/iron superoxide dismutase
Medtr3g094250	'21.6'	'redox.dismutases and catalases'	mitochondrial precursor (EC 1.15.1.1) - Pisum sativum (Garden pea) & (at3g10920 : 346.0) manganese superoxide dismutase (MSD1); manganese superoxide dismutase 1 (MSD1); FUNCTIONS IN: superoxide dismutase activity
Medtr4g057240	'21.6'	'redox.dismutases and catalases'	chloroplast precursor (EC 1.15.1.1) - Medicago sativa (Alfalfa) & (at2g28190 : 248.0) Encodes a chloroplastic copper/zinc superoxide dismutase CSD2 that can detoxify superoxide radicals. Its expression is affected by miR398-directed mRNA cleavage.; copper/zinc superoxide dismutase 2 (CSD2); FUNCTIONS IN: superoxide dismutase activity; INVOLVED IN: in 6 processes; LOCATED IN: thylakoid
Medtr4g084180	'21.99'	'redox.misc'	T
Medtr4g114030	'21.99'	'redox.misc'	copper ion binding; INVOLVED IN: response to salt stress; LOCATED IN: mitochondrion
Medtr7g087090	'21.99'	'redox.misc'	whereas no Cyt b5 reduction was observed when NADPH was used as the electron donor.; NADH:cytochrome B5 reductase 1 (CBR); FUNCTIONS IN: cytochrome-b5 reductase activity; INVOLVED IN: electron transport chain; LOCATED IN: endoplasmic reticulum
Medtr8g069905	'22.1.2'	'polyamine metabolism.synthesis.SAM decarboxylase'	spermine biosynthetic process; LOCATED IN: cellular_component unknown; CONTAINS InterPro DOMAIN/s: S-adenosylmethionine decarboxylase
Medtr4g110140	'22.1.4'	'polyamine metabolism.synthesis.agmatine deiminase'	Peptidyl-arginine deiminase
Medtr4g112810	'22.1.4'	'polyamine metabolism.synthesis.agmatine deiminase'	Peptidyl-arginine deiminase
Medtr8g063940	'22.1.6'	'polyamine metabolism.synthesis.spermidine synthase'	T
Medtr2g093280	'23.1.1.1'	'nucleotide metabolism.synthesis.pyrimidine.carbamoyl phosphate synthetase'	; carbamoyl phosphate synthetase B (CARB); FUNCTIONS IN: catalytic activity
Medtr3g095490	'23.1.1.1'	'nucleotide metabolism.synthesis.pyrimidine.carbamoyl phosphate synthetase'	; carbamoyl phosphate synthetase A (CARA); FUNCTIONS IN: carbamoyl-phosphate synthase (glutamine-hydrolyzing) activity
Medtr5g093570	'23.1.1.2'	'nucleotide metabolism.synthesis.pyrimidine.aspartate transcarbamoylase'	chloroplast precursor (EC 2.1.3.2) (Aspartate transcarbamylase 1) (ATCase 1) - Pisum sativum (Garden pea) & (at3g20330 : 515.0) encodes aspartate carbamoyltransferase catalyzing the second step in the de novo pyrimidine ribonucleotide biosynthesis; PYRIMIDINE B (PYRB); FUNCTIONS IN: amino acid binding
Medtr1g114530	'23.1.1.4'	'nucleotide metabolism.synthesis.pyrimidine.dihydroorotate dehydrogenase'	catalyses fourth step of pyrimidine biosynthesis; pyrimidine d (PYRD); FUNCTIONS IN: dihydroorotate dehydrogenase activity; INVOLVED IN: 'de novo' pyrimidine base biosynthetic process
Medtr1g025060	'23.1.1.5'	'nucleotide metabolism.synthesis.pyrimidine.orotate phosphoribosyltransferase'	orotidine-5'-phosphate decarboxylase activity; INVOLVED IN: response to cadmium ion
Medtr3g017580	'23.1.1.5'	'nucleotide metabolism.synthesis.pyrimidine.orotate phosphoribosyltransferase'	orotidine-5'-phosphate decarboxylase activity; INVOLVED IN: response to cadmium ion
Medtr8g038390	'23.1.1.5'	'nucleotide metabolism.synthesis.pyrimidine.orotate phosphoribosyltransferase'	orotidine-5'-phosphate decarboxylase activity; INVOLVED IN: response to cadmium ion
Medtr4g072110	'23.1.2.1'	'nucleotide metabolism.synthesis.purine.amidophosphoribosyltransferase'	chloroplast precursor (EC 2.4.2.14) (Glutamine phosphoribosylpyrophosphate amidotransferase) (ATASE) (GPAT) - Glycine max (Soybean) & (at4g34740 : 848.0) Encodes glutamine 5-phosphoribosylpyrophosphate amidotransferase. Mutants are deficient in leaf
Medtr7g092260	'23.1.2.20'	'nucleotide metabolism.synthesis.purine.adenylosuccinate synthase'	the enzyme involved in the first step of the formation of the purine nucleotide AMP (conversion of IMP to adenylo-succinate); adenylosuccinate synthase (ADSS); FUNCTIONS IN: adenylosuccinate synthase activity; INVOLVED IN: response to cadmium ion
Medtr8g098325	'23.1.2.31'	'nucleotide metabolism.synthesis.purine.GMP synthetase'	putative / glutamine amidotransferase
Medtr8g093860	'23.1.2.5'	'nucleotide metabolism.synthesis.purine.AIR synthase'	chloroplast/mitochondrial precursor (EC 6.3.3.1) (AIRS) (Phosphoribosyl-aminoimidazole synthetase) (AIR synthase) (VUpur5) - Vigna unguiculata (Cowpea) & (at3g55010 : 417.0) encoding phosphoribosylformylglycinamidine cyclo-ligase (syn. AIR synthetase)that phosphorylates 5-phosphoribosyl-N-formylglycinamidine (FGAM) to form 5-aminoimidazole ribonucleotide (AIR); PUR5; FUNCTIONS IN: phosphoribosylf…
Medtr5g065270	'23.1.2.7'	'nucleotide metabolism.synthesis.purine.SAICAR synthetase'	syn. SAICAR synthetase)
Medtr5g033300	'23.1.3'	'nucleotide metabolism.synthesis.PRS-PP'	ribose phosphate diphosphokinase activity; INVOLVED IN: nucleotide biosynthetic process
Medtr5g075540	'23.1.3'	'nucleotide metabolism.synthesis.PRS-PP'	ribose phosphate diphosphokinase activity; INVOLVED IN: nucleotide biosynthetic process
Medtr2g009720	'23.1.99'	'nucleotide metabolism.synthesis.unspecified'	petal differentiation and expansion stage; CONTAINS InterPro DOMAIN/s: Glutamine amidotransferase class-I
Medtr2g011680	'23.2'	'nucleotide metabolism.degradation'	5'-bisphosphate nucleotidase activity
Medtr2g013060	'23.2'	'nucleotide metabolism.degradation'	ataln m2-1
Medtr4g103300	'23.2'	'nucleotide metabolism.degradation'	zinc ion binding
Medtr7g085200	'23.2'	'nucleotide metabolism.degradation'	T
Medtr8g469630	'23.2'	'nucleotide metabolism.degradation'	embryo development ending in seed dormancy; LOCATED IN: cytosol
Medtr5g089200	'23.2.1.4'	'nucleotide metabolism.degradation.pyrimidine.dihydropyrimidinase'	Amidohydrolase 1 (InterPro:IPR006680)
Medtr4g093580	'23.2.1.5'	'nucleotide metabolism.degradation.pyrimidine.beta-ureidopropionase'	when expressed in E. coli
Medtr3g111870	'23.3'	'nucleotide metabolism.salvage'	subfamily IG
Medtr3g103010	'23.3.1.1'	'nucleotide metabolism.salvage.phosphoribosyltransferases.aprt'	involved in the one-step salvage of adenine to AMP.; adenine phosphoribosyl transferase 1 (APT1); CONTAINS InterPro DOMAIN/s: Adenine phosphoribosyl transferase (InterPro:IPR005764)
Medtr5g012210	'23.3.1.1'	'nucleotide metabolism.salvage.phosphoribosyltransferases.aprt'	which is a constitutively expressed enzyme involved in the one-step salvage of adenine to AMP. APT3 has higher affinity for zeatin
Medtr5g096660	'23.3.1.3'	'nucleotide metabolism.salvage.phosphoribosyltransferases.upp'	At3g27190
Medtr1g064060	'23.3.2.1'	'nucleotide metabolism.salvage.nucleoside kinases.adenosine kinase'	a typical
Medtr4g461070	'23.3.2.1'	'nucleotide metabolism.salvage.nucleoside kinases.adenosine kinase'	a typical
Medtr7g096100	'23.3.2.2'	'nucleotide metabolism.salvage.nucleoside kinases.uridine kinase'	alcohol group as acceptor
Medtr3g065330	'23.3.3'	'nucleotide metabolism.salvage.NUDIX hydrolases'	NUDIX hydrolase
Medtr3g460790	'23.3.3'	'nucleotide metabolism.salvage.NUDIX hydrolases'	NAD or NADH binding
Medtr4g087905	'23.3.3'	'nucleotide metabolism.salvage.NUDIX hydrolases'	NUDIX hydrolase domain (InterPro:IPR000086)
Medtr4g100480	'23.3.3'	'nucleotide metabolism.salvage.NUDIX hydrolases'	NUDIX hydrolase
Medtr4g101830	'23.3.3'	'nucleotide metabolism.salvage.NUDIX hydrolases'	ADP-sugar diphosphatase activity
Medtr4g113990	'23.3.3'	'nucleotide metabolism.salvage.NUDIX hydrolases'	metal ion binding; INVOLVED IN: biological_process unknown; LOCATED IN: chloroplast; EXPRESSED IN: 22 plant structures; EXPRESSED DURING: 13 growth stages; CONTAINS InterPro DOMAIN/s: Zinc ribbon
Medtr6g086510	'23.3.3'	'nucleotide metabolism.salvage.NUDIX hydrolases'	NUDIX hydrolase domain (InterPro:IPR000086); BEST Arabidopsis thaliana protein match is: nudix hydrolase homolog 24 (TAIR:AT5G19470.1); Has 30201 Blast hits to 17322 proteins in 780 species: Archae - 12; Bacteria - 1396; Metazoa - 17338; Fungi - 3422; Plants - 5037; Viruses - 0; Other Eukaryotes - 2996 (source: NCBI BLink). & (gnl|cdd|72896 : 239.0) no description available & (gnl|cdd|39514 : 188…
Medtr8g105140	'23.3.3'	'nucleotide metabolism.salvage.NUDIX hydrolases'	NUDIX hydrolase
Medtr2g461290	'23.4.1'	'nucleotide metabolism.phosphotransfer and pyrophosphatases.adenylate kinase'	nucleoside
Medtr4g103800	'23.4.1'	'nucleotide metabolism.phosphotransfer and pyrophosphatases.adenylate kinase'	adenylate kinase activity; INVOLVED IN: response to cadmium ion; LOCATED IN: mitochondrion
Medtr8g007235	'23.4.10'	'nucleotide metabolism.phosphotransfer and pyrophosphatases.nucleoside diphosphate kinase'	complete; NDPK1; FUNCTIONS IN: nucleoside diphosphate kinase activity
Medtr8g099450	'23.4.10'	'nucleotide metabolism.phosphotransfer and pyrophosphatases.nucleoside diphosphate kinase'	located to the inter-membrane space in mitochondria; nucleoside diphosphate kinase 3 (NDPK3); FUNCTIONS IN: nucleoside diphosphate kinase activity
Medtr4g035850	'23.4.3'	'nucleotide metabolism.phosphotransfer and pyrophosphatases.uridylate kinase'	nucleoside
Medtr2g010430	'23.4.99'	'nucleotide metabolism.phosphotransfer and pyrophosphatases.misc'	pyrophosphatase activity; INVOLVED IN: in 7 processes; LOCATED IN: thylakoid
Medtr6g092720	'23.4.99'	'nucleotide metabolism.phosphotransfer and pyrophosphatases.misc'	catalytic activity; INVOLVED IN: metabolic process
Medtr8g077180	'23.4.99'	'nucleotide metabolism.phosphotransfer and pyrophosphatases.misc'	metabolic process; LOCATED IN: membrane
Medtr7g086830	'23.5.3'	'nucleotide metabolism.deoxynucleotide metabolism.cytosine deaminase'	zinc ion binding
Medtr4g117370	'23.5.4'	'nucleotide metabolism.deoxynucleotide metabolism.ribonucleoside-diphosphate reductase'	DNA damage repair and plant development.; ribonucleotide reductase 2A (RNR2A); CONTAINS InterPro DOMAIN/s: Ribonucleotide reductase-related (InterPro:IPR012348)
Medtr4g019520	'24'	'Biodegradation of Xenobiotics'	beta-propeller (InterPro:IPR011043)
Medtr6g065270	'24'	'Biodegradation of Xenobiotics'	T
Medtr6g065340	'24'	'Biodegradation of Xenobiotics'	T
Medtr2g023500	'24.2'	'Biodegradation of Xenobiotics.lactoylglutathione lyase'	metal ion binding; INVOLVED IN: carbohydrate metabolic process; LOCATED IN: peroxisome; EXPRESSED IN: 25 plant structures; EXPRESSED DURING: 13 growth stages; CONTAINS InterPro DOMAIN/s: Glyoxalase I (InterPro:IPR004361)
Medtr2g103460	'24.2'	'Biodegradation of Xenobiotics.lactoylglutathione lyase'	M germinated pollen stage
Medtr3g110185	'24.2'	'Biodegradation of Xenobiotics.lactoylglutathione lyase'	metal ion binding; INVOLVED IN: response to cold
Medtr4g125860	'24.2'	'Biodegradation of Xenobiotics.lactoylglutathione lyase'	T
Medtr4g132260	'24.2'	'Biodegradation of Xenobiotics.lactoylglutathione lyase'	metal ion binding; INVOLVED IN: carbohydrate metabolic process; LOCATED IN: peroxisome; EXPRESSED IN: 25 plant structures; EXPRESSED DURING: 13 growth stages; CONTAINS InterPro DOMAIN/s: Glyoxalase I (InterPro:IPR004361)
Medtr4g132270	'24.2'	'Biodegradation of Xenobiotics.lactoylglutathione lyase'	metal ion binding; INVOLVED IN: carbohydrate metabolic process; LOCATED IN: peroxisome; EXPRESSED IN: 25 plant structures; EXPRESSED DURING: 13 growth stages; CONTAINS InterPro DOMAIN/s: Glyoxalase I (InterPro:IPR004361)
Medtr5g009740	'24.2'	'Biodegradation of Xenobiotics.lactoylglutathione lyase'	T
Medtr5g021610	'24.2'	'Biodegradation of Xenobiotics.lactoylglutathione lyase'	T
Medtr8g076160	'24.2'	'Biodegradation of Xenobiotics.lactoylglutathione lyase'	T
Medtr8g102980	'24.2'	'Biodegradation of Xenobiotics.lactoylglutathione lyase'	metal ion binding; INVOLVED IN: response to cold
Medtr2g010800	'25'	'C1-metabolism'	Ribonuclease E inhibitor RraA (InterPro:IPR010203); BEST Arabidopsis thaliana protein match is: Ribonuclease E inhibitor RraA/Dimethylmenaquinone methyltransferase (TAIR:AT5G16450.2); Has 1807 Blast hits to 1807 proteins in 277 species: Archae - 0; Bacteria - 0; Metazoa - 736; Fungi - 347; Plants - 385; Viruses - 0; Other Eukaryotes - 339 (source: NCBI BLink). & (gnl|cdd|82960 : 200.0) no descrip…
Medtr3g108640	'25'	'C1-metabolism'	and for vernalization-mediated histone modification.; PROTEIN ARGININE METHYLTRANSFERASE 5 (PRMT5); FUNCTIONS IN: protein methyltransferase activity; INVOLVED IN: positive regulation of vernalization response
Medtr4g070670	'25'	'C1-metabolism'	active site (InterPro:IPR020940)
Medtr5g044980	'25.3'	'C1-metabolism.dihydropteridine diphosphokinase'	dihydropteroate synthase activity; INVOLVED IN: pteridine and derivative metabolic process
Medtr0168s0080	'25.4'	'C1-metabolism.5-formyltetrahydrofolate cyclo-ligase'	i.e. serine hydroxymethyltransferase (SHMT) due to accumulating amounts of 5-Formyltetrahydrofolate; 5-formyltetrahydrofolate cycloligase (5-FCL); CONTAINS InterPro DOMAIN/s: 5-formyltetrahydrofolate cyclo-ligase (InterPro:IPR002698); Has 1110 Blast hits to 1110 proteins in 558 species: Archae - 4; Bacteria - 853; Metazoa - 105; Fungi - 55; Plants - 43; Viruses - 0; Other Eukaryotes - 50 (source:…
Medtr7g076680	'25.5'	'C1-metabolism.Methylenetetrahydrofolate dehydrogenase & Methenyltetrahydrofolate cyclohydrolase'	catalytic activity; INVOLVED IN: folic acid and derivative biosynthetic process
Medtr7g108580	'25.5'	'C1-metabolism.Methylenetetrahydrofolate dehydrogenase & Methenyltetrahydrofolate cyclohydrolase'	catalytic activity; INVOLVED IN: folic acid and derivative biosynthetic process
Medtr1g040105	'25.6'	'C1-metabolism.methylenetetrahydrofolate reductase'	complete; methylenetetrahydrofolate reductase 2 (MTHFR2); FUNCTIONS IN: methylenetetrahydrofolate reductase (NADPH) activity; INVOLVED IN: oxidation reduction
Medtr1g028510	'25.8'	'C1-metabolism.tetrahydrofolate synthase'	embryo development ending in seed dormancy; LOCATED IN: mitochondrial matrix; EXPRESSED IN: 22 plant structures; EXPRESSED DURING: 13 growth stages; CONTAINS InterPro DOMAIN/s: Mur ligase
Medtr0057s0130	'26.1'	'misc.misc2'	catalytic activity; INVOLVED IN: peptidyl-pyroglutamic acid biosynthetic process
Medtr2g012380	'26.1'	'misc.misc2'	zinc-binding dehydrogenase family protein; FUNCTIONS IN: oxidoreductase activity
Medtr2g090240	'26.1'	'misc.misc2'	catalytic activity; LOCATED IN: peroxisome; EXPRESSED IN: 22 plant structures; EXPRESSED DURING: 13 growth stages; CONTAINS InterPro DOMAIN/s: Epoxide hydrolase-like (InterPro:IPR000639)
Medtr2g090245	'26.1'	'misc.misc2'	catalytic activity; LOCATED IN: peroxisome; EXPRESSED IN: 22 plant structures; EXPRESSED DURING: 13 growth stages; CONTAINS InterPro DOMAIN/s: Epoxide hydrolase-like (InterPro:IPR000639)
Medtr3g005060	'26.1'	'misc.misc2'	T
Medtr3g009730	'26.1'	'misc.misc2'	phosphotransferase activity
Medtr4g011040	'26.1'	'misc.misc2'	a prerequisite for the action of methionine aminopeptidase during protein synthesis. Targeted to mitochondria. Requires Zn for catalysis.; peptide deformylase 1A (PDF1A); FUNCTIONS IN: peptide deformylase activity; INVOLVED IN: translation
Medtr4g050760	'26.1'	'misc.misc2'	zinc-binding dehydrogenase family protein; FUNCTIONS IN: oxidoreductase activity
Medtr4g089040	'26.1'	'misc.misc2'	catalytic activity; EXPRESSED IN: 22 plant structures; EXPRESSED DURING: 13 growth stages; CONTAINS InterPro DOMAIN/s: Epoxide hydrolase-like (InterPro:IPR000639)
Medtr4g095660	'26.1'	'misc.misc2'	hydrolase activity
Medtr4g117380	'26.1'	'misc.misc2'	nucleus
Medtr5g025370	'26.1'	'misc.misc2'	transmembrane (InterPro:IPR000620); BEST Arabidopsis thaliana protein match is: nodulin MtN21 /EamA-like transporter family protein (TAIR:AT5G45370.2); Has 30201 Blast hits to 17322 proteins in 780 species: Archae - 12; Bacteria - 1396; Metazoa - 17338; Fungi - 3422; Plants - 5037; Viruses - 0; Other Eukaryotes - 2996 (source: NCBI BLink). & (reliability: 710.0) & (original description: no origin…
Medtr5g025400	'26.1'	'misc.misc2'	transmembrane (InterPro:IPR000620); BEST Arabidopsis thaliana protein match is: nodulin MtN21 /EamA-like transporter family protein (TAIR:AT5G45370.2); Has 30201 Blast hits to 17322 proteins in 780 species: Archae - 12; Bacteria - 1396; Metazoa - 17338; Fungi - 3422; Plants - 5037; Viruses - 0; Other Eukaryotes - 2996 (source: NCBI BLink). & (reliability: 700.0) & (original description: no origin…
Medtr6g018970	'26.1'	'misc.misc2'	phosphotransferase activity
Medtr7g112615	'26.1'	'misc.misc2'	catalytic activity; EXPRESSED IN: 17 plant structures; EXPRESSED DURING: 13 growth stages; CONTAINS InterPro DOMAIN/s: Epoxide hydrolase-like (InterPro:IPR000639)
Medtr7g112970	'26.1'	'misc.misc2'	catalytic activity; EXPRESSED IN: 17 plant structures; EXPRESSED DURING: 13 growth stages; CONTAINS InterPro DOMAIN/s: Epoxide hydrolase-like (InterPro:IPR000639)
Medtr0147s0030	'26.10'	'misc.cytochrome P450'	family 714
Medtr0181s0030	'26.10'	'misc.cytochrome P450'	family 93
Medtr1g019410	'26.10'	'misc.cytochrome P450'	involved in ABA catabolism. Member of the CYP707A gene family.; "cytochrome P450
Medtr1g022040	'26.10'	'misc.cytochrome P450'	family 721
Medtr1g036200	'26.10'	'misc.cytochrome P450'	family 96
Medtr1g036270	'26.10'	'misc.cytochrome P450'	family 96
Medtr1g037580	'26.10'	'misc.cytochrome P450'	involved in ABA catabolism. Member of the CYP707A gene family. This gene predominantly accumulates in dry seeds and is up-regulated immediately following imbibition. CYP707A2 appears to play a major role in the rapid decrease in ABA levels during early seed imbibition.; "cytochrome P450
Medtr1g050362	'26.10'	'misc.cytochrome P450'	family 96
Medtr1g107295	'26.10'	'misc.cytochrome P450'	family 93
Medtr1g107305	'26.10'	'misc.cytochrome P450'	family 93
Medtr1g492820	'26.10'	'misc.cytochrome P450'	family 77
Medtr2g055470	'26.10'	'misc.cytochrome P450'	family 72
Medtr2g072250	'26.10'	'misc.cytochrome P450'	family 72
Medtr2g072270	'26.10'	'misc.cytochrome P450'	family 72
Medtr2g072310	'26.10'	'misc.cytochrome P450'	family 72
Medtr2g087890	'26.10'	'misc.cytochrome P450'	monooxygenase activity
Medtr3g057910	'26.10'	'misc.cytochrome P450'	family 71
Medtr3g058400	'26.10'	'misc.cytochrome P450'	family 71
Medtr3g076530	'26.10'	'misc.cytochrome P450'	family 71
Medtr3g093530	'26.10'	'misc.cytochrome P450'	family 714
Medtr4g025940	'26.10'	'misc.cytochrome P450'	family 71
Medtr4g031820	'26.10'	'misc.cytochrome P450'	family 72
Medtr4g075110	'26.10'	'misc.cytochrome P450'	nuclear gene for chloroplast product. CYP86B1 is a very long chain fatty acid hydroxylase specifically involved in polyester monomer biosynthesis during the course of plant development.; "cytochrome P450
Medtr4g086130	'26.10'	'misc.cytochrome P450'	involved in ABA catabolism. Member of the CYP707A gene family.; "cytochrome P450
Medtr4g088170	'26.10'	'misc.cytochrome P450'	family 93
Medtr4g088195	'26.10'	'misc.cytochrome P450'	family 93
Medtr4g088415	'26.10'	'misc.cytochrome P450'	family 82
Medtr4g088425	'26.10'	'misc.cytochrome P450'	family 82
Medtr5g007460	'26.10'	'misc.cytochrome P450'	family 76
Medtr5g009110	'26.10'	'misc.cytochrome P450'	family 97
Medtr5g010750	'26.10'	'misc.cytochrome P450'	family 87
Medtr5g018480	'26.10'	'misc.cytochrome P450'	family 82
Medtr5g045250	'26.10'	'misc.cytochrome P450'	promoting organ growth.; "cytochrome P450
Medtr6g004630	'26.10'	'misc.cytochrome P450'	family 96
Medtr6g008500	'26.10'	'misc.cytochrome P450'	family 82
Medtr6g035100	'26.10'	'misc.cytochrome P450'	family 71
Medtr6g042540	'26.10'	'misc.cytochrome P450'	family 82
Medtr7g055793	'26.10'	'misc.cytochrome P450'	family 714
Medtr7g088330	'26.10'	'misc.cytochrome P450'	family 94
Medtr8g027040	'26.10'	'misc.cytochrome P450'	family 78
Medtr8g042000	'26.10'	'misc.cytochrome P450'	family 72
Medtr8g076940	'26.10'	'misc.cytochrome P450'	family 722
Medtr8g080520	'26.10'	'misc.cytochrome P450'	promoting organ growth.; "cytochrome P450
Medtr2g088220	'26.11'	'misc.alcohol dehydrogenases'	plays a key role in the detoxification of reactive carbonyls; alkenal reductase (AER); FUNCTIONS IN: 2-alkenal reductase activity; INVOLVED IN: response to oxidative stress
Medtr5g087710	'26.11'	'misc.alcohol dehydrogenases'	zinc ion binding; INVOLVED IN: oxidation reduction; EXPRESSED IN: 11 plant structures; EXPRESSED DURING: 6 growth stages; CONTAINS InterPro DOMAIN/s: GroES-like (InterPro:IPR011032)
Medtr6g068930	'26.11'	'misc.alcohol dehydrogenases'	zinc ion binding; INVOLVED IN: oxidation reduction; EXPRESSED IN: 22 plant structures; EXPRESSED DURING: 13 growth stages; CONTAINS InterPro DOMAIN/s: GroES-like (InterPro:IPR011032)
Medtr7g099040	'26.11'	'misc.alcohol dehydrogenases'	the condensation product of glutathione and NO
Medtr7g406860	'26.11'	'misc.alcohol dehydrogenases'	binding
Medtr0685s0030	'26.11.1'	'misc.alcohol dehydrogenases.cinnamyl alcohol dehydrogenase'	apple tree
Medtr1g099230	'26.11.1'	'misc.alcohol dehydrogenases.cinnamyl alcohol dehydrogenase'	apple tree
Medtr3g005210	'26.11.1'	'misc.alcohol dehydrogenases.cinnamyl alcohol dehydrogenase'	apple tree
Medtr0286s0010	'26.12'	'misc.peroxidases'	heme binding; INVOLVED IN: oxidation reduction
Medtr1g054205	'26.12'	'misc.peroxidases'	heme binding; INVOLVED IN: oxidation reduction
Medtr1g066680	'26.12'	'misc.peroxidases'	heme binding; INVOLVED IN: defense response to fungus; EXPRESSED IN: 15 plant structures; EXPRESSED DURING: 7 growth stages; CONTAINS InterPro DOMAIN/s: Haem peroxidase (InterPro:IPR010255)
Medtr1g077000	'26.12'	'misc.peroxidases'	heme binding; INVOLVED IN: response to oxidative stress
Medtr1g101830	'26.12'	'misc.peroxidases'	oxidation reduction; LOCATED IN: endomembrane system; EXPRESSED IN: 24 plant structures; EXPRESSED DURING: 13 growth stages; CONTAINS InterPro DOMAIN/s: Haem peroxidase (InterPro:IPR010255)
Medtr2g008710	'26.12'	'misc.peroxidases'	heme binding; INVOLVED IN: oxidation reduction
Medtr2g008730	'26.12'	'misc.peroxidases'	heme binding; INVOLVED IN: oxidation reduction
Medtr2g029815	'26.12'	'misc.peroxidases'	heme binding; INVOLVED IN: response to zinc ion
Medtr2g084010	'26.12'	'misc.peroxidases'	peroxidase activity; INVOLVED IN: response to oxidative stress
Medtr2g084020	'26.12'	'misc.peroxidases'	peroxidase activity; INVOLVED IN: response to oxidative stress
Medtr3g072190	'26.12'	'misc.peroxidases'	peroxidase activity; INVOLVED IN: response to oxidative stress
Medtr3g072210	'26.12'	'misc.peroxidases'	heme binding; INVOLVED IN: response to other organism; LOCATED IN: cell wall; EXPRESSED IN: 8 plant structures; EXPRESSED DURING: 4 anthesis
Medtr3g072260	'26.12'	'misc.peroxidases'	heme binding; INVOLVED IN: oxidation reduction
Medtr3g094650	'26.12'	'misc.peroxidases'	peroxidase activity; INVOLVED IN: response to oxidative stress
Medtr3g105790	'26.12'	'misc.peroxidases'	heme binding; INVOLVED IN: oxidation reduction
Medtr3g466200	'26.12'	'misc.peroxidases'	heme binding; INVOLVED IN: oxidation reduction
Medtr4g030890	'26.12'	'misc.peroxidases'	heme binding; INVOLVED IN: oxidation reduction
Medtr4g031140	'26.12'	'misc.peroxidases'	heme binding; INVOLVED IN: oxidation reduction
Medtr5g016010	'26.12'	'misc.peroxidases'	peroxidase activity; INVOLVED IN: response to salt stress; LOCATED IN: endomembrane system; EXPRESSED IN: root; CONTAINS InterPro DOMAIN/s: Haem peroxidase (InterPro:IPR010255)
Medtr5g022870	'26.12'	'misc.peroxidases'	heme binding; INVOLVED IN: oxidation reduction
Medtr6g008075	'26.12'	'misc.peroxidases'	heme binding; INVOLVED IN: oxidation reduction
Medtr7g029030	'26.12'	'misc.peroxidases'	heme binding; INVOLVED IN: response to oxidative stress
Medtr7g093370	'26.12'	'misc.peroxidases'	heme binding; INVOLVED IN: oxidation reduction
Medtr8g075100	'26.12'	'misc.peroxidases'	heme binding; INVOLVED IN: oxidation reduction
Medtr8g076820	'26.12'	'misc.peroxidases'	heme binding; INVOLVED IN: response to oxidative stress
Medtr0188s0020	'26.13'	'misc.acid and other phosphatases'	acid phosphatase activity; INVOLVED IN: biological_process unknown; LOCATED IN: cell wall
Medtr1g052505	'26.13'	'misc.acid and other phosphatases'	protein serine/threonine phosphatase activity
Medtr1g109430	'26.13'	'misc.acid and other phosphatases'	response to stress; LOCATED IN: plasma membrane
Medtr1g112630	'26.13'	'misc.acid and other phosphatases'	acid phosphatase activity; INVOLVED IN: biological_process unknown; LOCATED IN: cell wall
Medtr2g100350	'26.13'	'misc.acid and other phosphatases'	M germinated pollen stage
Medtr3g051240	'26.13'	'misc.acid and other phosphatases'	acid phosphatase activity; INVOLVED IN: biological_process unknown; LOCATED IN: endomembrane system; EXPRESSED IN: 24 plant structures; EXPRESSED DURING: 13 growth stages; CONTAINS InterPro DOMAIN/s: Metallophosphoesterase (InterPro:IPR004843)
Medtr3g074930	'26.13'	'misc.acid and other phosphatases'	acid phosphatase activity; INVOLVED IN: biological_process unknown; LOCATED IN: endomembrane system; EXPRESSED IN: 24 plant structures; EXPRESSED DURING: 15 growth stages; CONTAINS InterPro DOMAIN/s: Purple acid phosphatase
Medtr3g083810	'26.13'	'misc.acid and other phosphatases'	a purple acid phosphatase with phytase activity. Expression of PAP15 is developmentally and temporally regulated
Medtr3g083820	'26.13'	'misc.acid and other phosphatases'	a purple acid phosphatase with phytase activity. Expression of PAP15 is developmentally and temporally regulated
Medtr4g037105	'26.13'	'misc.acid and other phosphatases'	acid phosphatase activity; INVOLVED IN: biological_process unknown; LOCATED IN: cell wall
Medtr4g063905	'26.13'	'misc.acid and other phosphatases'	similar to POL. Involved in leaf development. Knockout mutants have abnormally shaped leaves.; pol-like 5 (PLL5); FUNCTIONS IN: protein serine/threonine phosphatase activity
Medtr4g103520	'26.13'	'misc.acid and other phosphatases'	acid phosphatase activity; INVOLVED IN: biological_process unknown; LOCATED IN: endomembrane system; EXPRESSED IN: 24 plant structures; EXPRESSED DURING: 15 growth stages; CONTAINS InterPro DOMAIN/s: Purple acid phosphatase
Medtr5g045600	'26.13'	'misc.acid and other phosphatases'	protein serine/threonine phosphatase activity
Medtr5g045920	'26.13'	'misc.acid and other phosphatases'	AT5G11860 (SSP5)
Medtr7g009060	'26.13'	'misc.acid and other phosphatases'	transition metal ion binding
Medtr7g034465	'26.13'	'misc.acid and other phosphatases'	LSF1
Medtr7g056403	'26.13'	'misc.acid and other phosphatases'	a purple acid phosphatase with phytase activity. Expression of PAP15 is developmentally and temporally regulated
Medtr7g065890	'26.13'	'misc.acid and other phosphatases'	T
Medtr8g014650	'26.13'	'misc.acid and other phosphatases'	subfamily IIIB acid phosphatase ; FUNCTIONS IN: acid phosphatase activity; INVOLVED IN: biological_process unknown; LOCATED IN: endomembrane system; EXPRESSED IN: 21 plant structures; EXPRESSED DURING: 9 growth stages; CONTAINS InterPro DOMAIN/s: Acid phosphatase (Class B) (InterPro:IPR005519)
Medtr8g023770	'26.13'	'misc.acid and other phosphatases'	acid phosphatase activity; LOCATED IN: endomembrane system; EXPRESSED IN: 23 plant structures; EXPRESSED DURING: 13 growth stages; CONTAINS InterPro DOMAIN/s: Metallophosphoesterase (InterPro:IPR004843)
Medtr8g101690	'26.13'	'misc.acid and other phosphatases'	catalytic activity; INVOLVED IN: metabolic process; LOCATED IN: cellular_component unknown; EXPRESSED IN: 21 plant structures; EXPRESSED DURING: 15 growth stages; CONTAINS InterPro DOMAIN/s: Pyridoxal phosphate phosphatase
Medtr0163s0020	'26.16'	'misc.myrosinases-lectin-jacalin'	subgroup & (at5g10530 : 103.0) Concanavalin A-like lectin protein kinase family protein; FUNCTIONS IN: kinase activity; INVOLVED IN: protein amino acid phosphorylation; LOCATED IN: endomembrane system; EXPRESSED IN: root; CONTAINS InterPro DOMAIN/s: Legume lectin
Medtr0684s0020	'26.16'	'misc.myrosinases-lectin-jacalin'	beta chain & (at5g10530 : 103.0) Concanavalin A-like lectin protein kinase family protein; FUNCTIONS IN: kinase activity; INVOLVED IN: protein amino acid phosphorylation; LOCATED IN: endomembrane system; EXPRESSED IN: root; CONTAINS InterPro DOMAIN/s: Legume lectin
Medtr1g090930	'26.16'	'misc.myrosinases-lectin-jacalin'	beta chain & (at5g10530 : 80.1) Concanavalin A-like lectin protein kinase family protein; FUNCTIONS IN: kinase activity; INVOLVED IN: protein amino acid phosphorylation; LOCATED IN: endomembrane system; EXPRESSED IN: root; CONTAINS InterPro DOMAIN/s: Legume lectin
Medtr2g100595	'26.16'	'misc.myrosinases-lectin-jacalin'	T
Medtr3g031480	'26.16'	'misc.myrosinases-lectin-jacalin'	recognition of pollen; LOCATED IN: plasma membrane; EXPRESSED IN: 23 plant structures; EXPRESSED DURING: 13 growth stages; CONTAINS InterPro DOMAIN/s: Curculin-like (mannose-binding) lectin (InterPro:IPR001480)
Medtr3g031490	'26.16'	'misc.myrosinases-lectin-jacalin'	sugar binding
Medtr3g031510	'26.16'	'misc.myrosinases-lectin-jacalin'	recognition of pollen; LOCATED IN: plasma membrane; EXPRESSED IN: 23 plant structures; EXPRESSED DURING: 13 growth stages; CONTAINS InterPro DOMAIN/s: Curculin-like (mannose-binding) lectin (InterPro:IPR001480)
Medtr3g031600	'26.16'	'misc.myrosinases-lectin-jacalin'	protein kinase activity; INVOLVED IN: protein amino acid phosphorylation; LOCATED IN: plasma membrane
Medtr3g031610	'26.16'	'misc.myrosinases-lectin-jacalin'	protein kinase activity; INVOLVED IN: protein amino acid phosphorylation; LOCATED IN: plasma membrane
Medtr3g031640	'26.16'	'misc.myrosinases-lectin-jacalin'	protein kinase activity; INVOLVED IN: protein amino acid phosphorylation; LOCATED IN: plasma membrane
Medtr3g114970	'26.16'	'misc.myrosinases-lectin-jacalin'	cyclin-like (InterPro:IPR001810)
Medtr3g464370	'26.16'	'misc.myrosinases-lectin-jacalin'	T
Medtr4g094858	'26.16'	'misc.myrosinases-lectin-jacalin'	protein kinase activity; INVOLVED IN: protein amino acid phosphorylation; LOCATED IN: plasma membrane
Medtr4g114240	'26.16'	'misc.myrosinases-lectin-jacalin'	recognition of pollen; LOCATED IN: plasma membrane; EXPRESSED IN: 23 plant structures; EXPRESSED DURING: 13 growth stages; CONTAINS InterPro DOMAIN/s: Curculin-like (mannose-binding) lectin (InterPro:IPR001480)
Medtr7g058530	'26.16'	'misc.myrosinases-lectin-jacalin'	protein kinase activity; INVOLVED IN: protein amino acid phosphorylation; LOCATED IN: plasma membrane
Medtr7g058550	'26.16'	'misc.myrosinases-lectin-jacalin'	protein kinase activity; INVOLVED IN: protein amino acid phosphorylation; LOCATED IN: plasma membrane
Medtr7g058860	'26.16'	'misc.myrosinases-lectin-jacalin'	protein kinase activity; INVOLVED IN: protein amino acid phosphorylation; LOCATED IN: plasma membrane
Medtr7g066210	'26.16'	'misc.myrosinases-lectin-jacalin'	binding; INVOLVED IN: biological_process unknown; LOCATED IN: endomembrane system; EXPRESSED IN: 22 plant structures; EXPRESSED DURING: 13 growth stages; CONTAINS InterPro DOMAIN/s: Legume lectin
Medtr7g092050	'26.16'	'misc.myrosinases-lectin-jacalin'	protein kinase activity
Medtr4g022340	'26.17'	'misc.dynamin'	clathrin binding
Medtr4g094300	'26.17'	'misc.dynamin'	have enlarged
Medtr4g098920	'26.17'	'misc.dynamin'	DRP1E
Medtr4g134680	'26.17'	'misc.dynamin'	clathrin binding
Medtr5g009150	'26.17'	'misc.dynamin'	in combination with mutation in ADL1E
Medtr8g087770	'26.17'	'misc.dynamin'	GTPase activity; INVOLVED IN: biological_process unknown; LOCATED IN: cellular_component unknown; EXPRESSED IN: egg cell; CONTAINS InterPro DOMAIN/s: Dynamin GTPase effector (InterPro:IPR003130)
Medtr8g105580	'26.17'	'misc.dynamin'	partially co-localizes with mitochondrial markers
Medtr1g088540	'26.18'	'misc.invertase/pectin methylesterase inhibitor family protein'	pectinesterase inhibitor activity
Medtr4g035870	'26.18'	'misc.invertase/pectin methylesterase inhibitor family protein'	pectinesterase inhibitor activity
Medtr4g122750	'26.18'	'misc.invertase/pectin methylesterase inhibitor family protein'	stress responses and sugar signaling. This protein may inhibit their activity.; cell wall / vacuolar inhibitor of fructosidase 1 (C/VIF1); FUNCTIONS IN: enzyme inhibitor activity
Medtr5g012000	'26.18'	'misc.invertase/pectin methylesterase inhibitor family protein'	pectinesterase inhibitor activity
Medtr1g014120	'26.19'	'misc.plastocyanin-like'	copper ion binding; LOCATED IN: anchored to plasma membrane
Medtr1g112700	'26.19'	'misc.plastocyanin-like'	copper ion binding; LOCATED IN: anchored to membrane; CONTAINS InterPro DOMAIN/s: Plastocyanin-like (InterPro:IPR003245)
Medtr2g025580	'26.19'	'misc.plastocyanin-like'	copper ion binding; LOCATED IN: anchored to membrane; EXPRESSED IN: 22 plant structures; EXPRESSED DURING: 12 growth stages; CONTAINS InterPro DOMAIN/s: Plastocyanin-like (InterPro:IPR003245)
Medtr2g083250	'26.19'	'misc.plastocyanin-like'	copper ion binding; LOCATED IN: anchored to membrane; EXPRESSED IN: 22 plant structures; EXPRESSED DURING: 13 growth stages; CONTAINS InterPro DOMAIN/s: Plastocyanin-like (InterPro:IPR003245)
Medtr3g089035	'26.19'	'misc.plastocyanin-like'	copper ion binding; INVOLVED IN: pollination
Medtr4g081100	'26.19'	'misc.plastocyanin-like'	copper ion binding; LOCATED IN: anchored to membrane; EXPRESSED IN: 22 plant structures; EXPRESSED DURING: 13 growth stages; CONTAINS InterPro DOMAIN/s: Plastocyanin-like (InterPro:IPR003245)
Medtr5g006040	'26.19'	'misc.plastocyanin-like'	copper ion binding; LOCATED IN: anchored to membrane; EXPRESSED IN: 16 plant structures; EXPRESSED DURING: 10 growth stages; CONTAINS InterPro DOMAIN/s: Plastocyanin-like (InterPro:IPR003245)
Medtr5g088990	'26.19'	'misc.plastocyanin-like'	copper ion binding; LOCATED IN: anchored to membrane; EXPRESSED IN: 14 plant structures; EXPRESSED DURING: LP.06 six leaves visible
Medtr6g013420	'26.19'	'misc.plastocyanin-like'	copper ion binding; LOCATED IN: anchored to plasma membrane
Medtr6g023760	'26.19'	'misc.plastocyanin-like'	copper ion binding; LOCATED IN: anchored to membrane; EXPRESSED IN: 22 plant structures; EXPRESSED DURING: 12 growth stages; CONTAINS InterPro DOMAIN/s: Plastocyanin-like (InterPro:IPR003245)
Medtr8g007020	'26.19'	'misc.plastocyanin-like'	copper ion binding; LOCATED IN: anchored to membrane; CONTAINS InterPro DOMAIN/s: Plastocyanin-like (InterPro:IPR003245)
Medtr8g007035	'26.19'	'misc.plastocyanin-like'	copper ion binding; LOCATED IN: anchored to membrane; CONTAINS InterPro DOMAIN/s: Plastocyanin-like (InterPro:IPR003245)
Medtr8g463180	'26.19'	'misc.plastocyanin-like'	copper ion binding; LOCATED IN: in 6 components; EXPRESSED IN: 24 plant structures; EXPRESSED DURING: 13 growth stages; CONTAINS InterPro DOMAIN/s: Plastocyanin-like (InterPro:IPR003245)
Medtr0662s0030	'26.2'	'misc.UDP glucosyl and glucoronyl transferases'	6-N-acetylglucosaminyltransferase family protein; FUNCTIONS IN: transferase activity
Medtr1g006600	'26.2'	'misc.UDP glucosyl and glucoronyl transferases'	root
Medtr1g029350	'26.2'	'misc.UDP glucosyl and glucoronyl transferases'	T
Medtr1g035730	'26.2'	'misc.UDP glucosyl and glucoronyl transferases'	T
Medtr1g070490	'26.2'	'misc.UDP glucosyl and glucoronyl transferases'	transferase activity
Medtr1g090733	'26.2'	'misc.UDP glucosyl and glucoronyl transferases'	membrane; CONTAINS InterPro DOMAIN/s: Exostosin-like (InterPro:IPR004263); BEST Arabidopsis thaliana protein match is: Exostosin family protein (TAIR:AT5G19670.1); Has 1807 Blast hits to 1807 proteins in 277 species: Archae - 0; Bacteria - 0; Metazoa - 736; Fungi - 347; Plants - 385; Viruses - 0; Other Eukaryotes - 339 (source: NCBI BLink). & (gnl|cdd|36239 : 292.0) no description available & (gn…
Medtr1g090920	'26.2'	'misc.UDP glucosyl and glucoronyl transferases'	transferring glycosyl groups; INVOLVED IN: biological_process unknown; LOCATED IN: intrinsic to endoplasmic reticulum membrane; EXPRESSED IN: embryo
Medtr1g102430	'26.2'	'misc.UDP glucosyl and glucoronyl transferases'	membrane; EXPRESSED IN: 23 plant structures; EXPRESSED DURING: 13 growth stages; CONTAINS InterPro DOMAIN/s: Exostosin-like (InterPro:IPR004263); BEST Arabidopsis thaliana protein match is: Exostosin family protein (TAIR:AT2G20370.1); Has 691 Blast hits to 690 proteins in 30 species: Archae - 0; Bacteria - 0; Metazoa - 6; Fungi - 0; Plants - 667; Viruses - 0; Other Eukaryotes - 18 (source: NCBI B…
Medtr1g107285	'26.2'	'misc.UDP glucosyl and glucoronyl transferases'	T
Medtr1g107360	'26.2'	'misc.UDP glucosyl and glucoronyl transferases'	T
Medtr1g107375	'26.2'	'misc.UDP glucosyl and glucoronyl transferases'	5'-dimethoxynaringenin chalcone or sinapoyltriacetic acid lactone
Medtr2g102283	'26.2'	'misc.UDP glucosyl and glucoronyl transferases'	transferring glycosyl groups; INVOLVED IN: biosynthetic process; LOCATED IN: chloroplast; EXPRESSED IN: 21 plant structures; EXPRESSED DURING: 13 growth stages; CONTAINS InterPro DOMAIN/s: Glycosyl transferase
Medtr3g009510	'26.2'	'misc.UDP glucosyl and glucoronyl transferases'	T
Medtr3g009520	'26.2'	'misc.UDP glucosyl and glucoronyl transferases'	T
Medtr3g031400	'26.2'	'misc.UDP glucosyl and glucoronyl transferases'	transferring hexosyl groups
Medtr3g049970	'26.2'	'misc.UDP glucosyl and glucoronyl transferases'	T
Medtr3g092310	'26.2'	'misc.UDP glucosyl and glucoronyl transferases'	transferring hexosyl groups
Medtr3g452360	'26.2'	'misc.UDP glucosyl and glucoronyl transferases'	family 8 (InterPro:IPR002495); BEST Arabidopsis thaliana protein match is: galacturonosyltransferase 14 (TAIR:AT5G15470.1); Has 1513 Blast hits to 1502 proteins in 296 species: Archae - 0; Bacteria - 573; Metazoa - 140; Fungi - 8; Plants - 775; Viruses - 2; Other Eukaryotes - 15 (source: NCBI BLink). & (gnl|cdd|85496 : 147.0) no description available & (ipr002495 : 117.49371) Glycosyl transferase
Medtr4g008010	'26.2'	'misc.UDP glucosyl and glucoronyl transferases'	6-N-acetylglucosaminyltransferase family protein; FUNCTIONS IN: transferase activity
Medtr4g048320	'26.2'	'misc.UDP glucosyl and glucoronyl transferases'	transferring hexosyl groups
Medtr4g071620	'26.2'	'misc.UDP glucosyl and glucoronyl transferases'	transferring hexosyl groups
Medtr4g075580	'26.2'	'misc.UDP glucosyl and glucoronyl transferases'	4-glycosyltransferase family protein; FUNCTIONS IN: transferase activity
Medtr4g084060	'26.2'	'misc.UDP glucosyl and glucoronyl transferases'	4-glycosyltransferase family protein; FUNCTIONS IN: transferase activity
Medtr4g114140	'26.2'	'misc.UDP glucosyl and glucoronyl transferases'	6-N-acetylglucosaminyltransferase family protein; FUNCTIONS IN: transferase activity
Medtr4g115460	'26.2'	'misc.UDP glucosyl and glucoronyl transferases'	membrane; CONTAINS InterPro DOMAIN/s: Exostosin-like (InterPro:IPR004263); BEST Arabidopsis thaliana protein match is: Exostosin family protein (TAIR:AT5G11130.1); Has 1489 Blast hits to 1482 proteins in 115 species: Archae - 0; Bacteria - 12; Metazoa - 396; Fungi - 4; Plants - 968; Viruses - 0; Other Eukaryotes - 109 (source: NCBI BLink). & (gnl|cdd|36239 : 287.0) no description available & (gnl…
Medtr4g115530	'26.2'	'misc.UDP glucosyl and glucoronyl transferases'	T
Medtr4g119880	'26.2'	'misc.UDP glucosyl and glucoronyl transferases'	which is specific for UDP-xylose as donor substrate and for oligosaccharides with a degree of polymerization >4. Although the enzyme utilizes either cellopentaose or cellohexaose
Medtr5g015260	'26.2'	'misc.UDP glucosyl and glucoronyl transferases'	transferring hexosyl groups
Medtr5g031480	'26.2'	'misc.UDP glucosyl and glucoronyl transferases'	membrane; EXPRESSED IN: 22 plant structures; EXPRESSED DURING: 13 growth stages; CONTAINS InterPro DOMAIN/s: Exostosin-like (InterPro:IPR004263); BEST Arabidopsis thaliana protein match is: Exostosin family protein (TAIR:AT5G11610.1); Has 1409 Blast hits to 1398 proteins in 111 species: Archae - 0; Bacteria - 12; Metazoa - 341; Fungi - 4; Plants - 961; Viruses - 3; Other Eukaryotes - 88 (source: …
Medtr5g045960	'26.2'	'misc.UDP glucosyl and glucoronyl transferases'	transferring hexosyl groups
Medtr5g072810	'26.2'	'misc.UDP glucosyl and glucoronyl transferases'	transferring hexosyl groups
Medtr5g072820	'26.2'	'misc.UDP glucosyl and glucoronyl transferases'	transferring hexosyl groups
Medtr5g072830	'26.2'	'misc.UDP glucosyl and glucoronyl transferases'	transferring hexosyl groups
Medtr5g072860	'26.2'	'misc.UDP glucosyl and glucoronyl transferases'	transferring hexosyl groups
Medtr6g008900	'26.2'	'misc.UDP glucosyl and glucoronyl transferases'	transferring hexosyl groups
Medtr6g013840	'26.2'	'misc.UDP glucosyl and glucoronyl transferases'	family 8 (InterPro:IPR002495); BEST Arabidopsis thaliana protein match is: galacturonosyltransferase 13 (TAIR:AT3G01040.2); Has 1751 Blast hits to 1745 proteins in 385 species: Archae - 0; Bacteria - 750; Metazoa - 147; Fungi - 0; Plants - 822; Viruses - 2; Other Eukaryotes - 30 (source: NCBI BLink). & (gnl|cdd|85496 : 182.0) no description available & (ipr002495 : 154.17789) Glycosyl transferase
Medtr7g013180	'26.2'	'misc.UDP glucosyl and glucoronyl transferases'	transferase activity
Medtr7g074680	'26.2'	'misc.UDP glucosyl and glucoronyl transferases'	family 8 (InterPro:IPR002495); BEST Arabidopsis thaliana protein match is: galacturonosyltransferase 4 (TAIR:AT5G47780.1). & (gnl|cdd|85496 : 124.0) no description available & (ipr002495 : 84.0325) Glycosyl transferase
Medtr7g086720	'26.2'	'misc.UDP glucosyl and glucoronyl transferases'	transferring glycosyl groups
Medtr8g064870	'26.2'	'misc.UDP glucosyl and glucoronyl transferases'	5'-dimethoxynaringenin chalcone or sinapoyltriacetic acid lactone
Medtr8g071070	'26.2'	'misc.UDP glucosyl and glucoronyl transferases'	transferring hexosyl groups
Medtr8g102840	'26.2'	'misc.UDP glucosyl and glucoronyl transferases'	T
Medtr8g466240	'26.2'	'misc.UDP glucosyl and glucoronyl transferases'	T
Medtr1g012710	'26.21'	'misc.protease inhibitor/seed storage/lipid transfer protein (LTP) family protein'	Plant lipid transfer protein/seed storage/trypsin-alpha amylase inhibitor (InterPro:IPR003612)
Medtr3g079210	'26.21'	'misc.protease inhibitor/seed storage/lipid transfer protein (LTP) family protein'	Plant lipid transfer protein/seed storage/trypsin-alpha amylase inhibitor (InterPro:IPR003612); BEST Arabidopsis thaliana protein match is: Bifunctional inhibitor/lipid-transfer protein/seed storage 2S albumin superfamily protein (TAIR:AT2G27130.1); Has 35333 Blast hits to 34131 proteins in 2444 species: Archae - 798; Bacteria - 22429; Metazoa - 974; Fungi - 991; Plants - 531; Viruses - 0; Other …
Medtr3g082100	'26.21'	'misc.protease inhibitor/seed storage/lipid transfer protein (LTP) family protein'	Plant lipid transfer protein/seed storage/trypsin-alpha amylase inhibitor (InterPro:IPR003612)
Medtr4g101260	'26.21'	'misc.protease inhibitor/seed storage/lipid transfer protein (LTP) family protein'	Plant lipid transfer protein/seed storage/trypsin-alpha amylase inhibitor (InterPro:IPR003612)
Medtr6g082480	'26.21'	'misc.protease inhibitor/seed storage/lipid transfer protein (LTP) family protein'	Plant lipid transfer protein/seed storage/trypsin-alpha amylase inhibitor (InterPro:IPR003612)
Medtr7g007440	'26.21'	'misc.protease inhibitor/seed storage/lipid transfer protein (LTP) family protein'	Plant lipid transfer protein/seed storage/trypsin-alpha amylase inhibitor (InterPro:IPR003612)
Medtr7g065210	'26.21'	'misc.protease inhibitor/seed storage/lipid transfer protein (LTP) family protein'	Plant lipid transfer protein/seed storage/trypsin-alpha amylase inhibitor (InterPro:IPR003612); BEST Arabidopsis thaliana protein match is: Bifunctional inhibitor/lipid-transfer protein/seed storage 2S albumin superfamily protein (TAIR:AT5G05960.1); Has 183 Blast hits to 183 proteins in 26 species: Archae - 0; Bacteria - 0; Metazoa - 0; Fungi - 0; Plants - 183; Viruses - 0; Other Eukaryotes - 0 (…
Medtr7g082640	'26.21'	'misc.protease inhibitor/seed storage/lipid transfer protein (LTP) family protein'	Plant lipid transfer protein/seed storage/trypsin-alpha amylase inhibitor (InterPro:IPR003612)
Medtr1g068955	'26.22'	'misc.short chain dehydrogenase/reductase (SDR)'	binding
Medtr1g068970	'26.22'	'misc.short chain dehydrogenase/reductase (SDR)'	binding
Medtr4g058810	'26.22'	'misc.short chain dehydrogenase/reductase (SDR)'	binding
Medtr4g058820	'26.22'	'misc.short chain dehydrogenase/reductase (SDR)'	binding
Medtr4g058830	'26.22'	'misc.short chain dehydrogenase/reductase (SDR)'	binding
Medtr4g058840	'26.22'	'misc.short chain dehydrogenase/reductase (SDR)'	binding
Medtr6g023600	'26.22'	'misc.short chain dehydrogenase/reductase (SDR)'	binding
Medtr6g041980	'26.22'	'misc.short chain dehydrogenase/reductase (SDR)'	binding
Medtr7g071680	'26.22'	'misc.short chain dehydrogenase/reductase (SDR)'	binding
Medtr7g076660	'26.22'	'misc.short chain dehydrogenase/reductase (SDR)'	Glucose/ribitol dehydrogenase (InterPro:IPR002347)
Medtr7g094510	'26.22'	'misc.short chain dehydrogenase/reductase (SDR)'	binding
Medtr7g099850	'26.22'	'misc.short chain dehydrogenase/reductase (SDR)'	binding
Medtr7g107670	'26.22'	'misc.short chain dehydrogenase/reductase (SDR)'	binding
Medtr7g110130	'26.22'	'misc.short chain dehydrogenase/reductase (SDR)'	binding
Medtr7g110160	'26.22'	'misc.short chain dehydrogenase/reductase (SDR)'	binding
Medtr8g031600	'26.22'	'misc.short chain dehydrogenase/reductase (SDR)'	Glucose/ribitol dehydrogenase (InterPro:IPR002347)
Medtr8g031630	'26.22'	'misc.short chain dehydrogenase/reductase (SDR)'	Glucose/ribitol dehydrogenase (InterPro:IPR002347)
Medtr8g031650	'26.22'	'misc.short chain dehydrogenase/reductase (SDR)'	Glucose/ribitol dehydrogenase (InterPro:IPR002347)
Medtr8g031980	'26.22'	'misc.short chain dehydrogenase/reductase (SDR)'	Glucose/ribitol dehydrogenase (InterPro:IPR002347)
Medtr8g031990	'26.22'	'misc.short chain dehydrogenase/reductase (SDR)'	Glucose/ribitol dehydrogenase (InterPro:IPR002347)
Medtr8g032000	'26.22'	'misc.short chain dehydrogenase/reductase (SDR)'	Glucose/ribitol dehydrogenase (InterPro:IPR002347)
Medtr8g032030	'26.22'	'misc.short chain dehydrogenase/reductase (SDR)'	Glucose/ribitol dehydrogenase (InterPro:IPR002347)
Medtr8g096580	'26.22'	'misc.short chain dehydrogenase/reductase (SDR)'	At3g47350(HSD2)
Medtr8g098415	'26.22'	'misc.short chain dehydrogenase/reductase (SDR)'	binding
Medtr3g092040	'26.23'	'misc.rhodanese'	chloroplast; EXPRESSED IN: 21 plant structures; EXPRESSED DURING: 13 growth stages; CONTAINS InterPro DOMAIN/s: Rhodanese-like (InterPro:IPR001763); BEST Arabidopsis thaliana protein match is: Rhodanese/Cell cycle control phosphatase superfamily protein (TAIR:AT3G08920.1); Has 30201 Blast hits to 17322 proteins in 780 species: Archae - 12; Bacteria - 1396; Metazoa - 17338; Fungi - 3422; Plants - …
Medtr7g092820	'26.23'	'misc.rhodanese'	chloroplast; EXPRESSED IN: 22 plant structures; EXPRESSED DURING: 13 growth stages; CONTAINS InterPro DOMAIN/s: Rhodanese-like (InterPro:IPR001763); BEST Arabidopsis thaliana protein match is: Rhodanese/Cell cycle control phosphatase superfamily protein (TAIR:AT3G08920.1); Has 955 Blast hits to 955 proteins in 207 species: Archae - 14; Bacteria - 343; Metazoa - 1; Fungi - 0; Plants - 204; Viruses…
Medtr1g018030	'26.24'	'misc.GCN5-related N-acetyltransferase'	C-terminal (InterPro:IPR022610)
Medtr1g049370	'26.24'	'misc.GCN5-related N-acetyltransferase'	C-terminal (InterPro:IPR022610)
Medtr3g463610	'26.24'	'misc.GCN5-related N-acetyltransferase'	C-terminal (InterPro:IPR022610)
Medtr4g129490	'26.24'	'misc.GCN5-related N-acetyltransferase'	T
Medtr5g006450	'26.24'	'misc.GCN5-related N-acetyltransferase'	C-terminal (InterPro:IPR022610)
Medtr5g006460	'26.24'	'misc.GCN5-related N-acetyltransferase'	metabolic process; LOCATED IN: cellular_component unknown; EXPRESSED IN: stem
Medtr5g006470	'26.24'	'misc.GCN5-related N-acetyltransferase'	C-terminal (InterPro:IPR022610)
Medtr7g024765	'26.24'	'misc.GCN5-related N-acetyltransferase'	metabolic process; LOCATED IN: cellular_component unknown; EXPRESSED IN: stem
Medtr7g073990	'26.24'	'misc.GCN5-related N-acetyltransferase'	but not NSP. NSP inhibits NSI activity in vitro. NSI is highly transcribed in phloem and in xylem parenchyma cells
Medtr1g082470	'26.26.1'	'misc.aminotransferases.aminotransferase class IV family protein'	class IV (InterPro:IPR001544)
Medtr5g072900	'26.27'	'misc.calcineurin-like phosphoesterase family protein'	T
Medtr0565s0010	'26.28'	'misc.GDSL-motif lipase'	acting on ester bonds
Medtr1g025680	'26.28'	'misc.GDSL-motif lipase'	GDSL
Medtr1g025700	'26.28'	'misc.GDSL-motif lipase'	GDSL
Medtr1g025720	'26.28'	'misc.GDSL-motif lipase'	GDSL
Medtr1g030220	'26.28'	'misc.GDSL-motif lipase'	acting on ester bonds
Medtr2g015580	'26.28'	'misc.GDSL-motif lipase'	acting on ester bonds
Medtr2g017955	'26.28'	'misc.GDSL-motif lipase'	acting on ester bonds
Medtr2g017965	'26.28'	'misc.GDSL-motif lipase'	acting on ester bonds
Medtr2g100620	'26.28'	'misc.GDSL-motif lipase'	acting on ester bonds
Medtr3g024510	'26.28'	'misc.GDSL-motif lipase'	acting on ester bonds
Medtr3g052480	'26.28'	'misc.GDSL-motif lipase'	acting on ester bonds
Medtr3g052580	'26.28'	'misc.GDSL-motif lipase'	acting on ester bonds
Medtr3g082830	'26.28'	'misc.GDSL-motif lipase'	acting on ester bonds
Medtr3g464730	'26.28'	'misc.GDSL-motif lipase'	acting on ester bonds
Medtr4g016510	'26.28'	'misc.GDSL-motif lipase'	hydrolase activity
Medtr4g104240	'26.28'	'misc.GDSL-motif lipase'	acting on ester bonds
Medtr5g084750	'26.28'	'misc.GDSL-motif lipase'	acting on ester bonds
Medtr5g084790	'26.28'	'misc.GDSL-motif lipase'	acting on ester bonds
Medtr6g007090	'26.28'	'misc.GDSL-motif lipase'	acting on ester bonds
Medtr6g007095	'26.28'	'misc.GDSL-motif lipase'	acting on ester bonds
Medtr7g033150	'26.28'	'misc.GDSL-motif lipase'	acting on ester bonds
Medtr7g033165	'26.28'	'misc.GDSL-motif lipase'	acting on ester bonds
Medtr7g068470	'26.28'	'misc.GDSL-motif lipase'	hydrolase activity
Medtr7g087190	'26.28'	'misc.GDSL-motif lipase'	acting on ester bonds
Medtr7g104220	'26.28'	'misc.GDSL-motif lipase'	acting on ester bonds
Medtr7g111780	'26.28'	'misc.GDSL-motif lipase'	acting on ester bonds
Medtr7g113860	'26.28'	'misc.GDSL-motif lipase'	acting on ester bonds
Medtr8g014910	'26.28'	'misc.GDSL-motif lipase'	acting on ester bonds
Medtr8g031390	'26.28'	'misc.GDSL-motif lipase'	carboxylesterase activity; INVOLVED IN: lipid metabolic process; EXPRESSED IN: 18 plant structures; EXPRESSED DURING: 12 growth stages; CONTAINS InterPro DOMAIN/s: Lipase
Medtr0110s0030	'26.3'	'misc.gluco-	'(at3g18080 : 757.0) B-S glucosidase 44 (BGLU44); FUNCTIONS IN: in 6 functions; INVOLVED IN: carbohydrate metabolic process; LOCATED IN: cytosolic ribosome
Medtr0110s0040	'26.3'	'misc.gluco-	'(at3g18080 : 794.0) B-S glucosidase 44 (BGLU44); FUNCTIONS IN: in 6 functions; INVOLVED IN: carbohydrate metabolic process; LOCATED IN: cytosolic ribosome
Medtr1g082890	'26.3'	'misc.gluco-	'(q5h7p5|ebm_lillo : 1475.0) Mannosylglycoprotein endo-beta-mannosidase (EC 3.2.1.152) (Endo-beta-mannosidase) [Contains: Mannosylglycoprotein endo-beta-mannosidase 31 kDa subunit; Mannosylglycoprotein endo-beta-mannosidase 28 kDa subunit; Mannosylglycoprotein endo- & (at1g09010 : 1407.0) glycoside hydrolase family 2 protein; FUNCTIONS IN: cation binding
Medtr2g022710	'26.3'	'misc.gluco-	'(at4g21760 : 637.0) beta-glucosidase 47 (BGLU47); FUNCTIONS IN: cation binding
Medtr2g069490	'26.3'	'misc.gluco-	'(at1g16610 : 139.0) Encodes SR45
Medtr2g079580	'26.3'	'misc.gluco-	'(gnl|cdd|35845 : 622.0) no description available & (at1g61820 : 518.0) beta glucosidase 46 (BGLU46); FUNCTIONS IN: cation binding
Medtr2g090390	'26.3'	'misc.gluco-	'(at2g20680 : 602.0) Glycosyl hydrolase superfamily protein; FUNCTIONS IN: cation binding
Medtr3g026400	'26.3'	'misc.gluco-	'(gnl|cdd|35845 : 651.0) no description available & (at2g44480 : 550.0) beta glucosidase 17 (BGLU17); FUNCTIONS IN: cation binding
Medtr3g026620	'26.3'	'misc.gluco-	'(gnl|cdd|35845 : 666.0) no description available & (at2g44480 : 528.0) beta glucosidase 17 (BGLU17); FUNCTIONS IN: cation binding
Medtr3g033790	'26.3'	'misc.gluco-	'(at5g36890 : 701.0) beta glucosidase 42 (BGLU42); FUNCTIONS IN: cation binding
Medtr4g016920	'26.3'	'misc.gluco-	'(gnl|cdd|35845 : 618.0) no description available & (at1g02850 : 608.0) beta glucosidase 11 (BGLU11); FUNCTIONS IN: cation binding
Medtr4g066330	'26.3'	'misc.gluco-	'(gnl|cdd|35845 : 655.0) no description available & (at5g44640 : 528.0) beta glucosidase 13 (BGLU13); FUNCTIONS IN: cation binding
Medtr4g078230	'26.3'	'misc.gluco-	'(at2g20680 : 602.0) Glycosyl hydrolase superfamily protein; FUNCTIONS IN: cation binding
Medtr4g131810	'26.3'	'misc.gluco-	'(gnl|cdd|35845 : 620.0) no description available & (at1g61820 : 607.0) beta glucosidase 46 (BGLU46); FUNCTIONS IN: cation binding
Medtr5g068740	'26.3'	'misc.gluco-	'(at1g02850 : 635.0) beta glucosidase 11 (BGLU11); FUNCTIONS IN: cation binding
Medtr7g068910	'26.3'	'misc.gluco-	'(gnl|cdd|35845 : 598.0) no description available & (at1g02850 : 570.0) beta glucosidase 11 (BGLU11); FUNCTIONS IN: cation binding
Medtr8g080360	'26.3'	'misc.gluco-	'(ipr004888 : 1500.0) Glycoside hydrolase
Medtr1g110980	'26.3.1'	'misc.gluco-	'(at1g68560 : 1437.0) Encodes a bifunctional alpha-l-arabinofuranosidase/beta-d-xylosidase that belongs to family 3 of glycoside hydrolases.; alpha-xylosidase 1 (XYL1); FUNCTIONS IN: xyloglucan 1
Medtr1g023120	'26.3.2'	'misc.gluco-	'(at1g45130 : 1046.0) beta-galactosidase 5 (BGAL5); FUNCTIONS IN: cation binding
Medtr2g100110	'26.3.2'	'misc.gluco-	'(at3g13750 : 1032.0) beta-galactosidase
Medtr3g096900	'26.3.2'	'misc.gluco-	'(at5g63810 : 1070.0) member of Glycoside Hydrolase Family 35; beta-galactosidase 10 (BGAL10); FUNCTIONS IN: cation binding
Medtr3g117840	'26.3.2'	'misc.gluco-	'(at2g16730 : 1039.0) putative beta-galactosidase (BGAL13 gene); glycosyl hydrolase family 35 protein; FUNCTIONS IN: beta-galactosidase activity; INVOLVED IN: lactose catabolic process
Medtr4g059680	'26.3.2'	'misc.gluco-	'(at2g28470 : 1207.0) putative beta-galactosidase (BGAL8 gene); beta-galactosidase 8 (BGAL8); FUNCTIONS IN: cation binding
Medtr5g021190	'26.3.2'	'misc.gluco-	'(at4g36360 : 1444.0) putative beta-galactosidase (BGAL3 gene); beta-galactosidase 3 (BGAL3); FUNCTIONS IN: beta-galactosidase activity; INVOLVED IN: carbohydrate metabolic process; LOCATED IN: endomembrane system; EXPRESSED IN: 23 plant structures; EXPRESSED DURING: 13 growth stages; CONTAINS InterPro DOMAIN/s: Glycoside hydrolase
Medtr1g088190	'26.3.4'	'misc.gluco-	'(at4g02290 : 449.0) glycosyl hydrolase 9B13 (GH9B13); FUNCTIONS IN: hydrolase activity
Medtr3g117500	'26.3.4'	'misc.gluco-	'(at4g39010 : 703.0) glycosyl hydrolase 9B18 (GH9B18); FUNCTIONS IN: hydrolase activity
Medtr8g089665	'26.3.5'	'misc.gluco-	'(at1g13130 : 624.0) Cellulase (glycosyl hydrolase family 5) protein; FUNCTIONS IN: cation binding
Medtr5g008750	'26.30'	'misc. other Ferredoxins and Rieske domain'	2 iron
Medtr8g085790	'26.30'	'misc. other Ferredoxins and Rieske domain'	oxidoreductase activity
Medtr8g085820	'26.30'	'misc. other Ferredoxins and Rieske domain'	oxidoreductase activity
Medtr8g085840	'26.30'	'misc. other Ferredoxins and Rieske domain'	oxidoreductase activity
Medtr2g072500	'26.4'	'misc.beta 1	'(at1g78520 : 125.0) Carbohydrate-binding X8 domain superfamily protein; FUNCTIONS IN: molecular_function unknown; INVOLVED IN: biological_process unknown; LOCATED IN: endomembrane system; CONTAINS InterPro DOMAIN/s: X8 (InterPro:IPR012946); BEST Arabidopsis thaliana protein match is: Carbohydrate-binding X8 domain superfamily protein (TAIR:AT2G43670.1); Has 1475 Blast hits to 1425 proteins in 40…
Medtr3g108600	'26.4'	'misc.beta 1	'(at4g31140 : 629.0) O-Glycosyl hydrolases family 17 protein; FUNCTIONS IN: cation binding
Medtr4g079530	'26.4'	'misc.beta 1	'(at3g58100 : 123.0) Encodes a member of the X8-GPI family of proteins. It localizes to the plasmodesmata and is predicted to bind callose.; plasmodesmata callose-binding protein 5 (PDCB5); FUNCTIONS IN: callose binding
Medtr4g109490	'26.4'	'misc.beta 1	'(at1g18650 : 128.0) Encodes a member of the X8-GPI family of proteins. It localizes to the plasmodesmata and is predicted to bind callose.; plasmodesmata callose-binding protein 3 (PDCB3); CONTAINS InterPro DOMAIN/s: X8 (InterPro:IPR012946); BEST Arabidopsis thaliana protein match is: glucan endo-1
Medtr7g111600	'26.4'	'misc.beta 1	'(gnl|cdd|87420 : 119.0) no description available & (at2g30933 : 105.0) Carbohydrate-binding X8 domain superfamily protein; FUNCTIONS IN: molecular_function unknown; INVOLVED IN: biological_process unknown; LOCATED IN: endomembrane system; CONTAINS InterPro DOMAIN/s: X8 (InterPro:IPR012946); BEST Arabidopsis thaliana protein match is: Carbohydrate-binding X8 domain superfamily protein (TAIR:AT1G0…
Medtr1g031900	'26.4.1'	'misc.beta 1	'medtr1g031900.2'
Medtr2g034440	'26.4.1'	'misc.beta 1	'medtr2g034440.1'
Medtr4g069940	'26.4.1'	'misc.beta 1	'medtr4g069940.1'
Medtr4g076255	'26.4.1'	'misc.beta 1	'medtr4g076255.1'
Medtr4g076430	'26.4.1'	'misc.beta 1	'medtr4g076430.1'
Medtr4g076440	'26.4.1'	'misc.beta 1	'medtr4g076440.1'
Medtr4g076470	'26.4.1'	'misc.beta 1	'medtr4g076470.1'
Medtr4g076490	'26.4.1'	'misc.beta 1	'medtr4g076490.1'
Medtr5g085580	'26.4.1'	'misc.beta 1	'medtr5g085580.1'
Medtr8g012400	'26.4.1'	'misc.beta 1	'medtr8g012400.2'
Medtr8g085720	'26.4.1'	'misc.beta 1	'medtr8g085720.2'
Medtr4g122920	'26.5'	'misc.acyl transferases'	T
Medtr7g084940	'26.5'	'misc.acyl transferases'	transferring acyl groups other than amino-acyl groups
Medtr8g072540	'26.5'	'misc.acyl transferases'	transferase activity
Medtr0079s0070	'26.6'	'misc.O-methyl transferases'	quercetin 3-O-methyltransferase activity
Medtr0591s0010	'26.6'	'misc.O-methyl transferases'	quercetin 3-O-methyltransferase activity
Medtr3g013960	'26.6'	'misc.O-methyl transferases'	methyltransferase activity
Medtr3g111840	'26.6'	'misc.O-methyl transferases'	methylltransferase (InterPro:IPR011610)
Medtr4g038440	'26.6'	'misc.O-methyl transferases'	quercetin 3-O-methyltransferase activity
Medtr6g091770	'26.6'	'misc.O-methyl transferases'	PrmA (InterPro:IPR010456); BEST Arabidopsis thaliana protein match is: protein arginine methyltransferase 1A (TAIR:AT2G19670.1); Has 2778 Blast hits to 2730 proteins in 659 species: Archae - 61; Bacteria - 655; Metazoa - 1180; Fungi - 241; Plants - 326; Viruses - 1; Other Eukaryotes - 314 (source: NCBI BLink). & (gnl|cdd|36712 : 475.0) no description available & (reliability: 1156.0) & (original …
Medtr7g011990	'26.6'	'misc.O-methyl transferases'	quercetin 3-O-methyltransferase activity
Medtr8g068600	'26.6'	'misc.O-methyl transferases'	quercetin 3-O-methyltransferase activity
Medtr8g068620	'26.6'	'misc.O-methyl transferases'	quercetin 3-O-methyltransferase activity
Medtr8g068690	'26.6'	'misc.O-methyl transferases'	quercetin 3-O-methyltransferase activity
Medtr1g104590	'26.7'	'misc.oxidases - copper	'(at1g31690 : 824.0) Copper amine oxidase family protein; FUNCTIONS IN: quinone binding
Medtr2g039160	'26.7'	'misc.oxidases - copper	'(at4g29720 : 570.0) polyamine oxidase 5 (PAO5); FUNCTIONS IN: primary amine oxidase activity; LOCATED IN: endomembrane system; EXPRESSED IN: 22 plant structures; EXPRESSED DURING: 13 growth stages; CONTAINS InterPro DOMAIN/s: Amine oxidase (InterPro:IPR002937); BEST Arabidopsis thaliana protein match is: LSD1-like 3 (TAIR:AT4G16310.1); Has 3107 Blast hits to 2713 proteins in 458 species: Archae …
Medtr3g008580	'26.7'	'misc.oxidases - copper	'(at4g25240 : 804.0) Encodes GPI-anchored SKU5-like protein.; SKU5 similar 1 (SKS1); FUNCTIONS IN: oxidoreductase activity
Medtr4g036260	'26.7'	'misc.oxidases - copper	'(at4g13010 : 369.0) Oxidoreductase
Medtr4g045887	'26.7'	'misc.oxidases - copper	'(q43077|amo_pea : 1181.0) Amine oxidase [copper-containing] precursor (EC 1.4.3.6) - Pisum sativum (Garden pea) & (at1g31710 : 682.0) Copper amine oxidase family protein; FUNCTIONS IN: primary amine oxidase activity
Medtr4g124800	'26.7'	'misc.oxidases - copper	'(at1g19250 : 686.0) FMO1 is required for full expression of TIR-NB-LRR??conditioned resistance to avirulent pathogens and for basal resistance to invasive virulent pathogens. Functions in an EDS1-regulated but SA-independent mechanism that promotes resistance and cell death at pathogen infection sites.; flavin-dependent monooxygenase 1 (FMO1); FUNCTIONS IN: NADP or NADPH binding
Medtr5g013250	'26.7'	'misc.oxidases - copper	'(at2g35660 : 577.0) Encodes a member of a novel gene family with homology to known proteins involved in hydroxylation and oxidation of an aromatic ring.; CTF2A; FUNCTIONS IN: monooxygenase activity; INVOLVED IN: oxidation reduction; CONTAINS InterPro DOMAIN/s: Monooxygenase
Medtr5g025090	'26.7'	'misc.oxidases - copper	'(at1g14130 : 365.0) 2-oxoglutarate (2OG) and Fe(II)-dependent oxygenase superfamily protein; FUNCTIONS IN: oxidoreductase activity
Medtr5g033170	'26.7'	'misc.oxidases - copper	'(at2g42490 : 1196.0) Copper amine oxidase family protein; FUNCTIONS IN: quinone binding
Medtr6g012170	'26.7'	'misc.oxidases - copper	'(at1g23740 : 322.0) Oxidoreductase
Medtr7g034395	'26.7'	'misc.oxidases - copper	'(at1g23740 : 381.0) Oxidoreductase
Medtr7g055743	'26.7'	'misc.oxidases - copper	'(at4g13010 : 398.0) Oxidoreductase
Medtr7g086090	'26.7'	'misc.oxidases - copper	'(at3g17675 : 90.9) Encodes a Plantacyanin/Basic blue family protein; Cupredoxin superfamily protein; FUNCTIONS IN: electron carrier activity
Medtr8g009840	'26.7'	'misc.oxidases - copper	'(at3g03080 : 509.0) Zinc-binding dehydrogenase family protein; FUNCTIONS IN: oxidoreductase activity
Medtr8g010000	'26.7'	'misc.oxidases - copper	'(at5g16970 : 453.0) encodes a 2-alkenal reductase (EC 1.3.1.74)
Medtr8g010020	'26.7'	'misc.oxidases - copper	'(at5g16970 : 462.0) encodes a 2-alkenal reductase (EC 1.3.1.74)
Medtr8g035630	'26.7'	'misc.oxidases - copper	'(at1g23740 : 239.0) Oxidoreductase
Medtr8g064610	'26.7'	'misc.oxidases - copper	'(at1g23740 : 438.0) Oxidoreductase
Medtr8g479390	'26.7'	'misc.oxidases - copper	'(at5g66920 : 748.0) SKU5 similar 17 (sks17); FUNCTIONS IN: oxidoreductase activity
Medtr1g082750	'26.8'	'misc.nitrilases	reticuline oxidases
Medtr2g031560	'26.8'	'misc.nitrilases	reticuline oxidases
Medtr3g009760	'26.8'	'misc.nitrilases	reticuline oxidases
Medtr3g009820	'26.8'	'misc.nitrilases	reticuline oxidases
Medtr3g009850	'26.8'	'misc.nitrilases	reticuline oxidases
Medtr3g009880	'26.8'	'misc.nitrilases	reticuline oxidases
Medtr3g068065	'26.8'	'misc.nitrilases	reticuline oxidases
Medtr3g068175	'26.8'	'misc.nitrilases	reticuline oxidases
Medtr4g005860	'26.8'	'misc.nitrilases	reticuline oxidases
Medtr4g073980	'26.8'	'misc.nitrilases	reticuline oxidases
Medtr4g094488	'26.8'	'misc.nitrilases	reticuline oxidases
Medtr4g094518	'26.8'	'misc.nitrilases	reticuline oxidases
Medtr5g011010	'26.8'	'misc.nitrilases	reticuline oxidases
Medtr5g041340	'26.8'	'misc.nitrilases	reticuline oxidases
Medtr5g058430	'26.8'	'misc.nitrilases	reticuline oxidases
Medtr7g033325	'26.8'	'misc.nitrilases	reticuline oxidases
Medtr8g016320	'26.8'	'misc.nitrilases	reticuline oxidases
Medtr8g080880	'26.8'	'misc.nitrilases	reticuline oxidases
Medtr8g080890	'26.8'	'misc.nitrilases	reticuline oxidases
Medtr8g097220	'26.8'	'misc.nitrilases	reticuline oxidases
Medtr0186s0030	'26.9'	'misc.glutathione S transferases'	oxidative stress
Medtr1g026140	'26.9'	'misc.glutathione S transferases'	glutathione binding; INVOLVED IN: in 8 processes; LOCATED IN: in 7 components; EXPRESSED IN: 25 plant structures; EXPRESSED DURING: 16 growth stages; CONTAINS InterPro DOMAIN/s: Thioredoxin fold (InterPro:IPR012335)
Medtr1g067180	'26.9'	'misc.glutathione S transferases'	Glutathione S-transferase
Medtr1g115195	'26.9'	'misc.glutathione S transferases'	Glutathione S-transferase
Medtr1g116270	'26.9'	'misc.glutathione S transferases'	chloroplast stroma; EXPRESSED IN: 23 plant structures; EXPRESSED DURING: 15 growth stages; CONTAINS InterPro DOMAIN/s: Thioredoxin fold (InterPro:IPR012335)
Medtr2g070060	'26.9'	'misc.glutathione S transferases'	Glutathione S-transferase
Medtr2g070130	'26.9'	'misc.glutathione S transferases'	Glutathione S-transferase
Medtr2g070140	'26.9'	'misc.glutathione S transferases'	Glutathione S-transferase
Medtr2g070150	'26.9'	'misc.glutathione S transferases'	Glutathione S-transferase
Medtr2g072120	'26.9'	'misc.glutathione S transferases'	Glutathione S-transferase
Medtr3g064700	'26.9'	'misc.glutathione S transferases'	Glutathione S-transferase
Medtr3g099757	'26.9'	'misc.glutathione S transferases'	Glutathione S-transferase
Medtr4g019780	'26.9'	'misc.glutathione S transferases'	toxin catabolic process; LOCATED IN: cytoplasm; EXPRESSED IN: 7 plant structures; EXPRESSED DURING: LP.06 six leaves visible
Medtr4g019790	'26.9'	'misc.glutathione S transferases'	toxin catabolic process; LOCATED IN: cytoplasm; EXPRESSED IN: 7 plant structures; EXPRESSED DURING: LP.06 six leaves visible
Medtr5g037380	'26.9'	'misc.glutathione S transferases'	Glutathione S-transferase
Medtr7g065600	'26.9'	'misc.glutathione S transferases'	toxin catabolic process; LOCATED IN: cytoplasm; EXPRESSED IN: 7 plant structures; EXPRESSED DURING: LP.06 six leaves visible
Medtr7g065660	'26.9'	'misc.glutathione S transferases'	toxin catabolic process; LOCATED IN: cytoplasm; EXPRESSED IN: 7 plant structures; EXPRESSED DURING: LP.06 six leaves visible
Medtr7g065680	'26.9'	'misc.glutathione S transferases'	toxin catabolic process; LOCATED IN: cytoplasm; EXPRESSED IN: 7 plant structures; EXPRESSED DURING: LP.06 six leaves visible
Medtr7g065740	'26.9'	'misc.glutathione S transferases'	Glutathione S-transferase
Medtr7g088160	'26.9'	'misc.glutathione S transferases'	Glutathione S-transferase
Medtr8g061950	'26.9'	'misc.glutathione S transferases'	Glutathione S-transferase
Medtr8g087425	'26.9'	'misc.glutathione S transferases'	Glutathione S-transferase
Medtr0072s0050	'27.1'	'RNA.processing'	pseudouridine synthase activity; INVOLVED IN: biological_process unknown; LOCATED IN: box H/ACA snoRNP complex; EXPRESSED IN: 23 plant structures; EXPRESSED DURING: 13 growth stages; CONTAINS InterPro DOMAIN/s: H/ACA ribonucleoprotein complex
Medtr1g059720	'27.1'	'RNA.processing'	mitochondrial precursor (PPR protein) (Fertility restorer) (Restorer for CMS) - Oryza sativa (Rice) & (reliability: 942.0) & (original description: no original description)'
Medtr1g063040	'27.1'	'RNA.processing'	curled leaves and reduced abundance of certain miRNA species.; HASTY (HST); CONTAINS InterPro DOMAIN/s: Exportin-1/Importin-beta-like (InterPro:IPR013598)
Medtr1g066900	'27.1'	'RNA.processing'	mitochondrial precursor (PPR protein) (Fertility restorer) (Restorer for CMS) - Oryza sativa (Rice) & (reliability: 1894.0) & (original description: no original description)'
Medtr1g114000	'27.1'	'RNA.processing'	a key nucleolar protein in eukaryotes which associates with box C/D small nucleolar RNAs (snoRNAs) directing 2'-O-ribose methylation of the rRNA. This gene also encodes a novel box C/D snoRNA
Medtr2g029940	'27.1'	'RNA.processing'	such as rRNA biogenesis
Medtr2g042700	'27.1'	'RNA.processing'	Like-Sm ribonucleoprotein (LSM) domain
Medtr2g087200	'27.1'	'RNA.processing'	T
Medtr2g101710	'27.1'	'RNA.processing'	mitochondrial precursor (PPR protein) (Fertility restorer) (Restorer for CMS) - Oryza sativa (Rice) & (reliability: 942.0) & (original description: no original description)'
[truncated: 4,612 more rows]

## Sheet: 0 profile dark mapman
IDENTIFIER	BINCODE	NAME Mapman annotation	TYPE
Medtr2g081090	'1.1.1.1'	'PS.lightreaction.photosystem II.LHC-II'	thylakoid
Medtr3g070340	'1.1.1.1'	'PS.lightreaction.photosystem II.LHC-II'	light harvesting complex of photosystem II; light harvesting complex photosystem II (LHCB4.3); CONTAINS InterPro DOMAIN/s: Chlorophyll A-B binding protein (InterPro:IPR001344); BEST Arabidopsis thaliana protein match is: light harvesting complex photosystem II (TAIR:AT3G08940.2). & (q93wd2|cb29_chlre : 247.0) Chlorophyll a-b binding protein CP29 - Chlamydomonas reinhardtii & (gnl|cdd|84819 : 159.…
Medtr5g097280	'1.1.1.1'	'PS.lightreaction.photosystem II.LHC-II'	chloroplast precursor (LHCII type II CAB-215) (LHCP) - Pisum sativum (Garden pea) & (at2g05100 : 437.0) Lhcb2.1 protein encoding a subunit of the light harvesting complex II. Member of a gene family with high degree of sequence similarity. Initially LHCB2.3 was considered as a separate gene but appears to be an allele of LHCB2.1.; photosystem II light harvesting complex gene 2.1 (LHCB2.1); FUNCTI…
Medtr6g011870	'1.1.1.1'	'PS.lightreaction.photosystem II.LHC-II'	chloroplast precursor (LHCII type I CAB-AB80) (LHCP) - Pisum sativum (Garden pea) & (at1g29930 : 437.0) Subunit of light-harvesting complex II (LHCII)
Medtr6g011880	'1.1.1.1'	'PS.lightreaction.photosystem II.LHC-II'	chloroplast precursor (LHCII type I CAB-40) (LHCP) - Nicotiana tabacum (Common tobacco) & (at1g29930 : 439.0) Subunit of light-harvesting complex II (LHCII)
Medtr6g011890	'1.1.1.1'	'PS.lightreaction.photosystem II.LHC-II'	chloroplast precursor (LHCII type I CAB-AB80) (LHCP) - Pisum sativum (Garden pea) & (at1g29930 : 434.0) Subunit of light-harvesting complex II (LHCII)
Medtr6g012080	'1.1.1.1'	'PS.lightreaction.photosystem II.LHC-II'	chloroplast precursor (LHCII type I CAB-AB80) (LHCP) - Pisum sativum (Garden pea) & (at1g29930 : 436.0) Subunit of light-harvesting complex II (LHCII)
Medtr6g012110	'1.1.1.1'	'PS.lightreaction.photosystem II.LHC-II'	chloroplast precursor (LHCII type I CAB-AB80) (LHCP) - Pisum sativum (Garden pea) & (at1g29930 : 424.0) Subunit of light-harvesting complex II (LHCII)
Medtr1g115410	'1.1.1.2'	'PS.lightreaction.photosystem II.PSII polypeptide subunits'	chloroplast thylakoid lumen
Medtr2g090200	'1.1.1.2'	'PS.lightreaction.photosystem II.PSII polypeptide subunits'	chloroplast thylakoid membrane
Medtr3g088040	'1.1.1.2'	'PS.lightreaction.photosystem II.PSII polypeptide subunits'	chloroplast precursor (CP22) - Spinacia oleracea (Spinach) & (at1g44575 : 256.0) Encoding PSII-S (CP22)
Medtr3g089890	'1.1.1.2'	'PS.lightreaction.photosystem II.PSII polypeptide subunits'	thylakoid lumen
Medtr7g088880	'1.1.1.2'	'PS.lightreaction.photosystem II.PSII polypeptide subunits'	thylakoid lumen
Medtr1g098280	'1.1.2.1'	'PS.lightreaction.photosystem I.LHC-I'	chloroplast; EXPRESSED IN: 22 plant structures; EXPRESSED DURING: 13 growth stages; Has 171 Blast hits to 159 proteins in 56 species: Archae - 0; Bacteria - 5; Metazoa - 24; Fungi - 6; Plants - 64; Viruses - 16; Other Eukaryotes - 56 (source: NCBI BLink). & (reliability: 320.0) & (original description: no original description)'
Medtr2g042720	'1.1.2.1'	'PS.lightreaction.photosystem I.LHC-I'	; photosystem I light harvesting complex gene 6 (LHCA6); FUNCTIONS IN: chlorophyll binding; INVOLVED IN: response to blue light
Medtr3g101670	'1.1.2.1'	'PS.lightreaction.photosystem I.LHC-I'	light harvesting in photosystem I
Medtr6g033320	'1.1.2.1'	'PS.lightreaction.photosystem I.LHC-I'	response to red light
Medtr1g026820	'1.1.2.2'	'PS.lightreaction.photosystem I.PSI polypeptide subunits'	chloroplast precursor (Photosystem I subunit X) (PSI-K) - Medicago sativa (Alfalfa) & (at1g30380 : 153.0) Encodes subunit K of photosystem I reaction center.; photosystem I subunit K (PSAK); FUNCTIONS IN: molecular_function unknown; INVOLVED IN: photosynthesis; LOCATED IN: thylakoid
Medtr3g095540	'1.1.2.2'	'PS.lightreaction.photosystem I.PSI polypeptide subunits'	photosystem I
Medtr5g006130	'1.1.2.2'	'PS.lightreaction.photosystem I.PSI polypeptide subunits'	chloroplast precursor (Photosystem I 20 kDa subunit) (PSI-D) (PS I subunit 5) - Cucumis sativus (Cucumber) & (at4g02770 : 263.0) Encodes a protein predicted by sequence similarity with spinach PsaD to be photosystem I reaction center subunit II (PsaD1); photosystem I subunit D-1 (PSAD-1); FUNCTIONS IN: molecular_function unknown; INVOLVED IN: photosynthesis; LOCATED IN: in 6 components; EXPRESSED…
Medtr7g118290	'1.1.2.2'	'PS.lightreaction.photosystem I.PSI polypeptide subunits'	and this ratio is not affected by light. Contains seven phosphorylation sites on threonine residue and chloroplast targeting signal. Located in the proximity of PSI-L
Medtr8g024180	'1.1.2.2'	'PS.lightreaction.photosystem I.PSI polypeptide subunits'	and this ratio is not affected by light. Contains seven phosphorylation sites on threonine residue and chloroplast targeting signal. Located in the proximity of PSI-L
Medtr1g034260	'1.1.3'	'PS.lightreaction.cytochrome b6/f'	putative; Has 37 Blast hits to 37 proteins in 10 species: Archae - 0; Bacteria - 0; Metazoa - 0; Fungi - 0; Plants - 37; Viruses - 0; Other Eukaryotes - 0 (source: NCBI BLink). & (reliability: 204.0) & (original description: no original description)'
Medtr2g089510	'1.1.3'	'PS.lightreaction.cytochrome b6/f'	chloroplast precursor (EC 1.10.99.1) (Rieske iron-sulfur protein) (Plastohydroquinone:plastocyanin oxidoreductase iron-sulfur protein) (ISP) (RISP) - Pisum sativum (Garden pea) & (at4g03280 : 281.0) Encodes the Rieske FeS center of cytochrome b6f complex. Gene is expressed in shoot but not in root. Mutant has reduced electron transport at saturating light intensities and Q-cycle activity is hyper…
Medtr4g079850	'1.1.4'	'PS.lightreaction.ATP synthase'	T
Medtr3g106820	'1.1.4.9'	'PS.lightreaction.ATP synthase.subunit B_ (ATPX)'	chloroplast precursor (EC 3.6.3.14) (Subunit II) - Spinacia oleracea (Spinach) & (at4g32260 : 184.0) ATPase
Medtr2g025140	'1.1.40'	'PS.lightreaction.cyclic electron flow-chlororespiration'	a non-colored C40 carotenoid intermediate. This suggests that immutans controls
Medtr4g010140	'1.1.40'	'PS.lightreaction.cyclic electron flow-chlororespiration'	T
Medtr4g102440	'1.1.40'	'PS.lightreaction.cyclic electron flow-chlororespiration'	a transmembrane protein present in thylakoids. PGRL1A has a highly homologous isoform PGRL1B encoded by At4g11960. Plants lacking PGRL1 show perturbation of cyclic electron flow
Medtr5g011220	'1.1.40'	'PS.lightreaction.cyclic electron flow-chlororespiration'	a transmembrane protein present in thylakoids. PGRL1A has a highly homologous isoform PGRL1B encoded by At4g11960. Plants lacking PGRL1 show perturbation of cyclic electron flow
Medtr3g105080	'1.1.5.2'	'PS.lightreaction.other electron carrier (ox/red).ferredoxin'	T
Medtr3g088645	'1.1.6'	'PS.lightreaction.NADH DH'	acting on NADH or NADPH
Medtr3g096290	'1.1.6'	'PS.lightreaction.NADH DH'	acting on NADH or NADPH
Medtr1g016230	'1.2.4.1'	'PS.photorespiration.glycine cleavage.P subunit'	mitochondrial precursor (EC 1.4.4.2) (Glycine decarboxylase) (Glycine cleavage system P-protein) - Pisum sativum (Garden pea) & (at4g33010 : 1796.0) glycine decarboxylase P-protein 1 (GLDP1); FUNCTIONS IN: glycine dehydrogenase (decarboxylating) activity
Medtr5g014260	'1.2.4.4'	'PS.photorespiration.glycine cleavage.H protein'	mitochondrial precursor - Pisum sativum (Garden pea) & (at1g32470 : 164.0) Single hybrid motif superfamily protein; FUNCTIONS IN: glycine dehydrogenase (decarboxylating) activity; INVOLVED IN: glycine catabolic process
Medtr5g030950	'1.2.5'	'PS.photorespiration.serine hydroxymethyltransferase'	mitochondrial precursor (EC 2.1.2.1) (Serine methylase) (Glycine hydroxymethyltransferase) (SHMT) - Pisum sativum (Garden pea) & (at4g37930 : 894.0) Encodes a protein with mitochondrial serine hydroxymethyltransferase activity
Medtr2g032540	'1.3.10'	'PS.calvin cycle.Rib5P Isomerase'	5-phosphoribose 1-diphosphate biosynthetic process
Medtr5g027530	'1.3.12'	'PS.calvin cycle.PRK'	chloroplast precursor (EC 2.7.1.19) (Phosphopentokinase) (PRKase) (PRK) - Mesembryanthemum crystallinum (Common ice plant) & (at1g32060 : 662.0) phosphoribulokinase (PRK); FUNCTIONS IN: protein binding
Medtr4g021210	'1.3.13'	'PS.calvin cycle.rubisco interacting'	a nuclear-encoded chloroplast protein that consists of two isoforms arising from alternative splicing in most plants. Required for the light activation of rubisco.; rubisco activase (RCA); FUNCTIONS IN: enzyme regulator activity
Medtr4g057970	'1.3.13'	'PS.calvin cycle.rubisco interacting'	chloroplast precursor (60 kDa chaperonin subunit alpha) (CPN-60 alpha) - Pisum sativum (Garden pea) & (at2g28000 : 785.0) Encodes chaperonin-60 alpha
Medtr6g018300	'1.3.2'	'PS.calvin cycle.rubisco small subunit'	chloroplast precursor (EC 4.1.1.39) (RuBisCO small subunit) - Medicago sativa (Alfalfa) & (at1g67090 : 278.0) ribulose bisphosphate carboxylase small chain 1A (RBCS1A); FUNCTIONS IN: ribulose-bisphosphate carboxylase activity
Medtr6g018310	'1.3.2'	'PS.calvin cycle.rubisco small subunit'	chloroplast precursor (EC 4.1.1.39) (RuBisCO small subunit) - Medicago sativa (Alfalfa) & (at1g67090 : 278.0) ribulose bisphosphate carboxylase small chain 1A (RBCS1A); FUNCTIONS IN: ribulose-bisphosphate carboxylase activity
Medtr7g007220	'1.3.2'	'PS.calvin cycle.rubisco small subunit'	chloroplast precursor (EC 4.1.1.39) (RuBisCO small subunit 3A) - Pisum sativum (Garden pea) & (at1g67090 : 261.0) ribulose bisphosphate carboxylase small chain 1A (RBCS1A); FUNCTIONS IN: ribulose-bisphosphate carboxylase activity
Medtr2g066110	'1.3.3'	'PS.calvin cycle.phosphoglycerate kinase'	chloroplast precursor (EC 2.7.2.3) - Nicotiana tabacum (Common tobacco) & (at1g56190 : 667.0) Phosphoglycerate kinase family protein; FUNCTIONS IN: phosphoglycerate kinase activity; INVOLVED IN: glycolysis; LOCATED IN: thylakoid
Medtr2g066120	'1.3.3'	'PS.calvin cycle.phosphoglycerate kinase'	cytosolic (EC 2.7.2.3) - Nicotiana tabacum (Common tobacco) & (at1g79550 : 666.0) Encodes cytosolic phosphoglycerate kinase (PGK).; phosphoglycerate kinase (PGK); FUNCTIONS IN: phosphoglycerate kinase activity; INVOLVED IN: glycolysis; LOCATED IN: cytosol
Medtr6g018680	'1.3.3'	'PS.calvin cycle.phosphoglycerate kinase'	chloroplast precursor (EC 2.7.2.3) - Nicotiana tabacum (Common tobacco) & (at3g12780 : 177.0) nuclear phosphoglycerate kinase (PGK1); phosphoglycerate kinase 1 (PGK1); FUNCTIONS IN: phosphoglycerate kinase activity; INVOLVED IN: response to cadmium ion
Medtr3g115920	'1.3.4'	'PS.calvin cycle.GAP'	chloroplast precursor (EC 1.2.1.13) (NADP-dependent glyceraldehydephosphate dehydrogenase subunit B) - Pisum sativum (Garden pea) & (at1g42970 : 499.0) Encodes chloroplast localized glyceraldehyde-3-phosphate dehydrogenase that can use both NADH and NADPH to reduce 1
Medtr7g084800	'1.3.4'	'PS.calvin cycle.GAP'	chloroplast precursor (EC 1.2.1.13) (NADP-dependent glyceraldehydephosphate dehydrogenase subunit A) - Pisum sativum (Garden pea) & (at1g12900 : 606.0) glyceraldehyde 3-phosphate dehydrogenase A subunit 2 (GAPA-2); FUNCTIONS IN: NAD or NADH binding
Medtr7g103020	'1.3.5'	'PS.calvin cycle.TPI'	such as chlorosis in light-grown seedlings may result from an accumulation of dihydroxyacetone phosphate (DHAP) and methylglyoxal (MG) in these mutants. Both splice variants appear to be expressed
Medtr4g057670	'1.3.6'	'PS.calvin cycle.aldolase'	chloroplast precursor (EC 4.1.2.13) (Fragment) - Pisum sativum (Garden pea) & (at2g21330 : 648.0) fructose-bisphosphate aldolase 1 (FBA1); FUNCTIONS IN: fructose-bisphosphate aldolase activity
Medtr4g071860	'1.3.6'	'PS.calvin cycle.aldolase'	chloroplast precursor (EC 4.1.2.13) (Fragment) - Pisum sativum (Garden pea) & (at2g21330 : 649.0) fructose-bisphosphate aldolase 1 (FBA1); FUNCTIONS IN: fructose-bisphosphate aldolase activity
Medtr5g096670	'1.3.6'	'PS.calvin cycle.aldolase'	cytoplasmic isozyme 1 (EC 4.1.2.13) - Pisum sativum (Garden pea) & (gnl|cdd|84661 : 618.0) no description available & (gnl|cdd|36770 : 585.0) no description available & (at4g26530 : 577.0) Aldolase superfamily protein; FUNCTIONS IN: fructose-bisphosphate aldolase activity; INVOLVED IN: glycolysis
Medtr7g081220	'10.1.12.2'	'cell wall.precursor synthesis.KDO pathway.KDO-8-Phosphate Synthase'	a component of cell wall rhamnogalacturonan II.; AtkdsA1; FUNCTIONS IN: 3-deoxy-8-phosphooctulonate synthase activity; INVOLVED IN: metabolic process
Medtr4g134490	'10.1.2'	'cell wall.precursor synthesis.UGE'	protein dimerization activity; INVOLVED IN: response to stress
Medtr7g076670	'10.1.21'	'cell wall.precursor synthesis.phosphomannomutase'	involved in ascorbate biosynthesis; phosphomannomutase (PMM); FUNCTIONS IN: protein binding
Medtr4g129820	'10.1.6'	'cell wall.precursor synthesis.GAE'	catalytic activity; INVOLVED IN: cellular metabolic process
Medtr7g108490	'10.1.8'	'cell wall.precursor synthesis.GER'	binding
Medtr2g028480	'10.2'	'cell wall.cellulose synthesis'	family 9 & (at5g49720 : 951.0) Encodes a membrane-bound endo-1
Medtr2g035780	'10.2'	'cell wall.cellulose synthesis'	plant-type cell wall biogenesis
Medtr4g055520	'10.2'	'cell wall.cellulose synthesis'	family 2 (InterPro:IPR001173); BEST Arabidopsis thaliana protein match is: Nucleotide-diphospho-sugar transferases superfamily protein (TAIR:AT5G03760.1); Has 5133 Blast hits to 5129 proteins in 1484 species: Archae - 200; Bacteria - 4017; Metazoa - 35; Fungi - 91; Plants - 482; Viruses - 11; Other Eukaryotes - 297 (source: NCBI BLink). & (gnl|cdd|31408 : 124.0) no description available & (reliab…
Medtr7g103590	'10.2'	'cell wall.cellulose synthesis'	family 2 (InterPro:IPR001173); BEST Arabidopsis thaliana protein match is: cellulose synthase-like A02 (TAIR:AT5G22740.1); Has 1807 Blast hits to 1807 proteins in 277 species: Archae - 0; Bacteria - 0; Metazoa - 736; Fungi - 347; Plants - 385; Viruses - 0; Other Eukaryotes - 339 (source: NCBI BLink). & (gnl|cdd|31408 : 126.0) no description available & (reliability: 1774.0) & (original descriptio…
Medtr8g063270	'10.2'	'cell wall.cellulose synthesis'	plant-type cell wall biogenesis
Medtr1g098550	'10.2.1'	'cell wall.cellulose synthesis.cellulose synthase'	related to CESA6.; cellulose synthase A9 (CESA9); FUNCTIONS IN: cellulose synthase activity
Medtr2g016630	'10.2.1'	'cell wall.cellulose synthesis.cellulose synthase'	reduced cellulose content
Medtr3g005560	'10.2.1'	'cell wall.cellulose synthesis.cellulose synthase'	transferase activity
Medtr3g030040	'10.2.1'	'cell wall.cellulose synthesis.cellulose synthase'	along with CESA1 and CESA6 are present in the same plasma membrane complex for cellulose biosynthesis. As inferred from the null role of secondary wall-type CesAs
Medtr8g092590	'10.2.1'	'cell wall.cellulose synthesis.cellulose synthase'	along with CESA1 and CESA3 are present in the same plasma membrane complex for cellulose biosynthesis. CESA2 and CESA5 are related to CESA6
Medtr2g462000	'10.2.2'	'cell wall.cellulose synthesis.COBRA'	similar to phytochelatin synthetase. Involved in secondary cell wall biosynthesis. Mutants make smaller plants with reduced levels of cellulose and cell wall sugars.; IRREGULAR XYLEM 6 (IRX6); INVOLVED IN: secondary cell wall biogenesis; LOCATED IN: plasma membrane
Medtr3g117690	'10.2.2'	'cell wall.cellulose synthesis.COBRA'	anchored to membrane; EXPRESSED IN: 24 plant structures; EXPRESSED DURING: 13 growth stages; CONTAINS InterPro DOMAIN/s: Glycosyl-phosphatidyl inositol-anchored
Medtr2g082650	'10.3.2'	'cell wall.hemicellulose synthesis.glucuronoxylan'	family 8 (InterPro:IPR002495); BEST Arabidopsis thaliana protein match is: galacturonosyltransferase 13 (TAIR:AT3G01040.2); Has 1807 Blast hits to 1807 proteins in 277 species: Archae - 0; Bacteria - 0; Metazoa - 736; Fungi - 347; Plants - 385; Viruses - 0; Other Eukaryotes - 339 (source: NCBI BLink). & (gnl|cdd|85496 : 180.0) no description available & (ipr002495 : 147.36545) Glycosyl transferase
Medtr5g019220	'10.3.2'	'cell wall.hemicellulose synthesis.glucuronoxylan'	transferring hexosyl groups
Medtr8g033360	'10.4.1.1'	'cell wall.pectin synthesis.homogalacturonan.Galacturonic Acid Trnasferase'	family 8 (InterPro:IPR002495); BEST Arabidopsis thaliana protein match is: galacturonosyltransferase 3 (TAIR:AT4G38270.2); Has 1521 Blast hits to 1503 proteins in 273 species: Archae - 4; Bacteria - 491; Metazoa - 148; Fungi - 2; Plants - 840; Viruses - 0; Other Eukaryotes - 36 (source: NCBI BLink). & (gnl|cdd|85496 : 188.0) no description available & (ipr002495 : 150.38138) Glycosyl transferase
Medtr2g093980	'10.5.1.1'	'cell wall.cell wall proteins.AGPs.AGP'	T
Medtr2g437700	'10.5.1.1'	'cell wall.cell wall proteins.AGPs.AGP'	abnormal siliques and root growth is inhibited under salt stress. The gene has similarity to arabinogalactan proteins and domains associated with cell adhesion.; salt overly sensitive 5 (SOS5); FUNCTIONS IN: polysaccharide binding; INVOLVED IN: multidimensional cell growth
Medtr4g050170	'10.5.1.1'	'cell wall.cell wall proteins.AGPs.AGP'	T
Medtr4g059780	'10.5.1.1'	'cell wall.cell wall proteins.AGPs.AGP'	anchored to membrane; EXPRESSED IN: 22 plant structures; EXPRESSED DURING: 13 growth stages; CONTAINS InterPro DOMAIN/s: FAS1 domain (InterPro:IPR000782); BEST Arabidopsis thaliana protein match is: FASCICLIN-like arabinogalactan-protein 11 (TAIR:AT5G03170.1); Has 1807 Blast hits to 1807 proteins in 277 species: Archae - 0; Bacteria - 0; Metazoa - 736; Fungi - 347; Plants - 385; Viruses - 0; Othe…
Medtr4g059790	'10.5.1.1'	'cell wall.cell wall proteins.AGPs.AGP'	anchored to membrane; EXPRESSED IN: 22 plant structures; EXPRESSED DURING: 13 growth stages; CONTAINS InterPro DOMAIN/s: FAS1 domain (InterPro:IPR000782); BEST Arabidopsis thaliana protein match is: FASCICLIN-like arabinogalactan-protein 11 (TAIR:AT5G03170.1); Has 1807 Blast hits to 1807 proteins in 277 species: Archae - 0; Bacteria - 0; Metazoa - 736; Fungi - 347; Plants - 385; Viruses - 0; Othe…
Medtr4g059840	'10.5.1.1'	'cell wall.cell wall proteins.AGPs.AGP'	anchored to membrane; EXPRESSED IN: 22 plant structures; EXPRESSED DURING: 13 growth stages; CONTAINS InterPro DOMAIN/s: FAS1 domain (InterPro:IPR000782); BEST Arabidopsis thaliana protein match is: FASCICLIN-like arabinogalactan-protein 11 (TAIR:AT5G03170.1); Has 1807 Blast hits to 1807 proteins in 277 species: Archae - 0; Bacteria - 0; Metazoa - 736; Fungi - 347; Plants - 385; Viruses - 0; Othe…
Medtr5g098060	'10.5.1.1'	'cell wall.cell wall proteins.AGPs.AGP'	plasma membrane
Medtr5g098420	'10.5.1.1'	'cell wall.cell wall proteins.AGPs.AGP'	complete cds; FASCICLIN-like arabinogalactan 2 (FLA2); INVOLVED IN: response to cyclopentenone; LOCATED IN: anchored to plasma membrane
Medtr7g101080	'10.5.1.1'	'cell wall.cell wall proteins.AGPs.AGP'	T
Medtr8g087460	'10.5.1.1'	'cell wall.cell wall proteins.AGPs.AGP'	anchored to membrane; EXPRESSED IN: 22 plant structures; EXPRESSED DURING: 13 growth stages; CONTAINS InterPro DOMAIN/s: FAS1 domain (InterPro:IPR000782); BEST Arabidopsis thaliana protein match is: FASCICLIN-like arabinogalactan-protein 11 (TAIR:AT5G03170.1); Has 1807 Blast hits to 1807 proteins in 277 species: Archae - 0; Bacteria - 0; Metazoa - 736; Fungi - 347; Plants - 385; Viruses - 0; Othe…
Medtr4g075333	'10.5.2'	'cell wall.cell wall proteins.proline rich proteins'	T
Medtr4g078535	'10.5.3'	'cell wall.cell wall proteins.LRR'	T
Medtr6g086115	'10.5.3'	'cell wall.cell wall proteins.LRR'	plant-type cell wall; EXPRESSED IN: 22 plant structures; EXPRESSED DURING: 13 growth stages; CONTAINS InterPro DOMAIN/s: Leucine-rich repeat-containing N-terminal domain
Medtr2g461970	'10.5.5'	'cell wall.cell wall proteins.RGP'	4-glucan-protein synthase [UDP-forming] 2 (EC 2.4.1.112) (UDP-glucose:protein transglucosylase 2) (UPTG 2) - Solanum tuberosum (Potato) & (at3g02230 : 640.0) reversibly glycosylated polypeptide possibly involved in plant cell wall synthesis; reversibly glycosylated polypeptide 1 (RGP1); FUNCTIONS IN: cellulose synthase (UDP-forming) activity; INVOLVED IN: response to salt stress
Medtr7g051650	'10.6.1'	'cell wall.degradation.cellulases and beta -1	'(gnl|cdd|35845 : 512.0) no description available & (gnl|cdd|84629 : 420.0) no description available & (at2g44450 : 339.0) beta glucosidase 15 (BGLU15); FUNCTIONS IN: cation binding
Medtr1g018200	'10.6.2'	'cell wall.degradation.mannan-xylose-arabinose-fucose'	beta-galactosidase activity
Medtr1g106860	'10.6.2'	'cell wall.degradation.mannan-xylose-arabinose-fucose'	hydrolyzing O-glycosyl compounds; INVOLVED IN: carbohydrate metabolic process; LOCATED IN: cell wall; EXPRESSED IN: 14 plant structures; EXPRESSED DURING: LP.04 four leaves visible
Medtr5g020890	'10.6.2'	'cell wall.degradation.mannan-xylose-arabinose-fucose'	hydrolase activity
Medtr1g067450	'10.6.3'	'cell wall.degradation.pectate lyases and polygalacturonases'	AmbAllergen (InterPro:IPR018082)
Medtr4g094435	'10.6.3'	'cell wall.degradation.pectate lyases and polygalacturonases'	transcription factor binding; INVOLVED IN: biological_process unknown; LOCATED IN: endomembrane system; CONTAINS InterPro DOMAIN/s: Leucine-rich repeat-containing N-terminal domain
Medtr7g033475	'10.6.3'	'cell wall.degradation.pectate lyases and polygalacturonases'	defense response; LOCATED IN: cell wall
Medtr2g089140	'10.7'	'cell wall.modification'	flower buds
Medtr3g064510	'10.7'	'cell wall.modification'	2004. Plant Mol Bio); expansin A13 (EXPA13); INVOLVED IN: plant-type cell wall modification involved in multidimensional cell growth
Medtr4g063975	'10.7'	'cell wall.modification'	2004. Plant Mol Bio). Involved in the formation of nematode-induced syncytia in roots of Arabidopsis thaliana.; expansin A4 (EXPA4); CONTAINS InterPro DOMAIN/s: Barwin-related endoglucanase (InterPro:IPR009009)
Medtr4g081950	'10.7'	'cell wall.modification'	2004. Plant Mol Bio). Involved in the formation of nematode-induced syncytia in roots of Arabidopsis thaliana.; expansin A15 (EXPA15); INVOLVED IN: plant-type cell wall modification involved in multidimensional cell growth
Medtr6g012500	'10.7'	'cell wall.modification'	2004. Plant Mol Bio); expansin A5 (EXPA5); INVOLVED IN: plant-type cell wall modification involved in multidimensional cell growth
Medtr7g108905	'10.8.1'	'cell wall.pectin*esterases.PME'	pectinesterase activity; INVOLVED IN: cell wall modification; LOCATED IN: endomembrane system
Medtr8g023150	'10.8.1'	'cell wall.pectin*esterases.PME'	plasma membrane
Medtr8g104580	'10.8.1'	'cell wall.pectin*esterases.PME'	pectinesterase activity; INVOLVED IN: cell wall modification; LOCATED IN: endomembrane system
Medtr7g110900	'10.8.2'	'cell wall.pectin*esterases.acetyl esterase'	T
Medtr2g103280	'11.1.1.2.3'	'lipid metabolism.FA synthesis and FA elongation.Acetyl CoA Carboxylation.heteromeric Complex.Biotin Carboxyl Carrier Protein'	Biotin/lipoyl attachment (InterPro:IPR000089); BEST Arabidopsis thaliana protein match is: Single hybrid motif superfamily protein (TAIR:AT1G52670.1); Has 3111 Blast hits to 3110 proteins in 1263 species: Archae - 10; Bacteria - 2402; Metazoa - 8; Fungi - 0; Plants - 130; Viruses - 0; Other Eukaryotes - 561 (source: NCBI BLink). & (reliability: 440.0) & (original description: no original descript…
Medtr4g062190	'11.1.10'	'lipid metabolism.FA synthesis and FA elongation.beta ketoacyl CoA synthase'	a member of the 3-ketoacyl-CoA synthase family involved in the biosynthesis of VLCFA (very long chain fatty acids).; 3-ketoacyl-CoA synthase 12 (KCS12); FUNCTIONS IN: transferase activity
Medtr4g113280	'11.1.10'	'lipid metabolism.FA synthesis and FA elongation.beta ketoacyl CoA synthase'	a member of the 3-ketoacyl-CoA synthase family involved in the biosynthesis of VLCFA (very long chain fatty acids).; 3-ketoacyl-CoA synthase 11 (KCS11); FUNCTIONS IN: transferase activity
Medtr1g069385	'11.1.3'	'lipid metabolism.FA synthesis and FA elongation.ketoacyl ACP synthase'	transferring acyl groups other than amino-acyl groups
Medtr5g014140	'11.1.30'	'lipid metabolism.FA synthesis and FA elongation.pyruvate kinase'	chloroplast precursor (EC 2.7.1.40) - Nicotiana tabacum (Common tobacco) & (at1g32440 : 684.0) encodes a chloroplast pyruvate kinase beta subunit. The enzyme is less active than the other chloroplast pyruvate kinase beta subunit encoded by AT5G52920. Involved in seed oil biosynthesis. Can partially complement the AT5G52920 mutant.; plastidial pyruvate kinase 3 (PKp3); FUNCTIONS IN: pyruvate kinas…
Medtr3g085740	'11.1.4'	'lipid metabolism.FA synthesis and FA elongation.ACP oxoacyl reductase'	chloroplast precursor (EC 1.1.1.100) (3-ketoacyl-acyl carrier protein reductase 1) (Beta-keto acyl-carrier protein reductase 1) - Brassica napus (Rape) & (at1g24360 : 332.0) NAD(P)-binding Rossmann-fold superfamily protein; FUNCTIONS IN: 3-oxoacyl-[acyl-carrier-protein] reductase activity
Medtr4g074950	'11.1.6'	'lipid metabolism.FA synthesis and FA elongation.enoyl ACP reductase'	mod1
Medtr3g064420	'11.1.8'	'lipid metabolism.FA synthesis and FA elongation.acyl coa ligase'	T
Medtr4g115920	'11.10.1'	'lipid metabolism.glycolipid synthesis.MGDG synthase'	and in non-photosynthetic tissues. Does not contribute to galactolipid synthesis under Pi-sufficient conditions but does under Pi starvation.; monogalactosyldiacylglycerol synthase 2 (MGD2); CONTAINS InterPro DOMAIN/s: Monogalactosyldiacylglycerol synthase (InterPro:IPR009695)
Medtr5g061520	'11.3'	'lipid metabolism.Phospholipid synthesis'	T
Medtr6g069600	'11.3'	'lipid metabolism.Phospholipid synthesis'	phosphoethanolamine N-methyltransferase activity; INVOLVED IN: metabolic process; EXPRESSED IN: guard cell; CONTAINS InterPro DOMAIN/s: Methyltransferase type 11 (InterPro:IPR013216); BEST Arabidopsis thaliana protein match is: S-adenosyl-L-methionine-dependent methyltransferases superfamily protein (TAIR:AT3G18000.1); Has 22304 Blast hits to 21648 proteins in 2625 species: Archae - 587; Bacteria…
Medtr8g030620	'11.3'	'lipid metabolism.Phospholipid synthesis'	acyltransferase activity; INVOLVED IN: metabolic process
Medtr8g107370	'11.3'	'lipid metabolism.Phospholipid synthesis'	phosphoethanolamine N-methyltransferase activity; INVOLVED IN: phosphatidylcholine biosynthetic process; EXPRESSED IN: sperm cell
Medtr6g039820	'11.3.2'	'lipid metabolism.Phospholipid synthesis.choline kinase'	whose expression is induced by high salt and mannitol.; Protein kinase superfamily protein; CONTAINS InterPro DOMAIN/s: Choline/ethanolamine kinase (InterPro:IPR002573)
Medtr6g040230	'11.3.2'	'lipid metabolism.Phospholipid synthesis.choline kinase'	whose expression is induced by high salt and mannitol.; Protein kinase superfamily protein; CONTAINS InterPro DOMAIN/s: Choline/ethanolamine kinase (InterPro:IPR002573)
Medtr1g073700	'11.3.7'	'lipid metabolism.Phospholipid synthesis.cyclopropane-fatty-acyl-phospholipid synthase'	Cyclopropane-fatty-acyl-phospholipid/mycolic acid synthase (InterPro:IPR003333)
Medtr7g090970	'11.5.2'	'lipid metabolism.glyceral metabolism.Glycerol-3-phosphate dehydrogenase (NAD+)'	auxotrophic for glycerol/G3P due to a loss-of-function mutation in the gpsA gene.; GPDHC1; CONTAINS InterPro DOMAIN/s: 6-phosphogluconate dehydrogenase
Medtr3g085210	'11.6'	'lipid metabolism.lipid transfer proteins etc'	a lipid transfer protein with a predicted GPI (glycosylphosphatidylinositol)-anchor domain. Localized in the plasma membrane. Disruption of the LTPG1 gene causes alterations of cuticular lipid composition
Medtr4g428370	'11.6'	'lipid metabolism.lipid transfer proteins etc'	At2g38530/LTP2
Medtr2g081810	'11.8'	'lipid metabolism.'exotics'(steroids	'(at5g54500 : 315.0) Encodes a flavin mononucleotide-binding flavodoxin-like quinone reductase that is a primary auxin-response gene.; flavodoxin-like quinone reductase 1 (FQR1); CONTAINS InterPro DOMAIN/s: NADPH-dependent FMN reductase (InterPro:IPR005025)
Medtr4g069250	'11.8'	'lipid metabolism.'exotics'(steroids	'(at4g36750 : 278.0) Quinone reductase family protein; FUNCTIONS IN: oxidoreductase activity
Medtr8g040730	'11.8'	'lipid metabolism.'exotics'(steroids	'(at5g07010 : 159.0) Encodes a sulfotransferase that acts specifically on 11- and 12-hydroxyjasmonic acid. Transcript levels for this enzyme are increased by treatments with jasmonic acid (JA)
Medtr7g113780	'11.8.1'	'lipid metabolism.'exotics' (steroids	'(at3g06470 : 242.0) GNS1/SUR4 membrane protein family; FUNCTIONS IN: molecular_function unknown; INVOLVED IN: biological_process unknown; LOCATED IN: integral to membrane; EXPRESSED IN: 22 plant structures; EXPRESSED DURING: 13 growth stages; CONTAINS InterPro DOMAIN/s: GNS1/SUR4 membrane protein (InterPro:IPR002076); BEST Arabidopsis thaliana protein match is: GNS1/SUR4 membrane protein family …
Medtr8g056100	'11.8.1'	'lipid metabolism.'exotics' (steroids	'(at2g46210 : 652.0) Fatty acid/sphingolipid desaturase; FUNCTIONS IN: oxidoreductase activity
Medtr6g093180	'11.8.6'	'lipid metabolism.'exotics' (steroids	'(gnl|cdd|35718 : 1146.0) no description available & (at2g07050 : 1010.0) Involved in the biosynthesis of brassinosteroids. Catalyzes the reaction from epoxysqualene to cycloartenol.; cycloartenol synthase 1 (CAS1); FUNCTIONS IN: cycloartenol synthase activity; INVOLVED IN: pentacyclic triterpenoid biosynthetic process
Medtr5g017260	'11.9.2.1'	'lipid metabolism.lipid degradation.lipases.triacylglycerol lipase'	class 3 (InterPro:IPR002921); BEST Arabidopsis thaliana protein match is: alpha/beta-Hydrolases superfamily protein (TAIR:AT1G56630.1); Has 1515 Blast hits to 1509 proteins in 328 species: Archae - 0; Bacteria - 466; Metazoa - 48; Fungi - 299; Plants - 385; Viruses - 5; Other Eukaryotes - 312 (source: NCBI BLink). & (gnl|cdd|73213 : 137.0) no description available & (gnl|cdd|39769 : 127.0) no des…
Medtr5g056550	'11.9.3'	'lipid metabolism.lipid degradation.lysophospholipases'	T
Medtr3g107360	'11.9.3.1'	'lipid metabolism.lipid degradation.lysophospholipases.phospholipase D'	phosphatidylinositol-4
Medtr3g012440	'11.9.3.2'	'lipid metabolism.lipid degradation.lysophospholipases.carboxylesterase'	petal differentiation and expansion stage; CONTAINS InterPro DOMAIN/s: Lipase
Medtr4g086480	'11.9.3.2'	'lipid metabolism.lipid degradation.lysophospholipases.carboxylesterase'	4-D-methyl.; CXE12; FUNCTIONS IN: carboxylesterase activity; INVOLVED IN: response to salt stress; LOCATED IN: cytoplasm; EXPRESSED IN: 24 plant structures; EXPRESSED DURING: 14 growth stages; CONTAINS InterPro DOMAIN/s: Lipase
Medtr1g026990	'11.9.3.3'	'lipid metabolism.lipid degradation.lysophospholipases.glycerophosphodiester phosphodiesterase'	putative; FUNCTIONS IN: transmembrane receptor protein serine/threonine kinase activity
Medtr1g027060	'11.9.3.3'	'lipid metabolism.lipid degradation.lysophospholipases.glycerophosphodiester phosphodiesterase'	protein kinase activity
Medtr1g027820	'11.9.3.3'	'lipid metabolism.lipid degradation.lysophospholipases.glycerophosphodiester phosphodiesterase'	ATP binding site (InterPro:IPR017441)
Medtr1g028130	'11.9.3.3'	'lipid metabolism.lipid degradation.lysophospholipases.glycerophosphodiester phosphodiesterase'	constitutive 4)
Medtr1g031220	'11.9.3.3'	'lipid metabolism.lipid degradation.lysophospholipases.glycerophosphodiester phosphodiesterase'	putative; FUNCTIONS IN: protein serine/threonine kinase activity
Medtr1g031450	'11.9.3.3'	'lipid metabolism.lipid degradation.lysophospholipases.glycerophosphodiester phosphodiesterase'	ATP binding site (InterPro:IPR017441)
Medtr1g031460	'11.9.3.3'	'lipid metabolism.lipid degradation.lysophospholipases.glycerophosphodiester phosphodiesterase'	protein kinase activity
Medtr1g110220	'11.9.3.3'	'lipid metabolism.lipid degradation.lysophospholipases.glycerophosphodiester phosphodiesterase'	putative; FUNCTIONS IN: protein serine/threonine kinase activity
Medtr1g110270	'11.9.3.3'	'lipid metabolism.lipid degradation.lysophospholipases.glycerophosphodiester phosphodiesterase'	putative; FUNCTIONS IN: protein serine/threonine kinase activity
Medtr2g036490	'11.9.3.3'	'lipid metabolism.lipid degradation.lysophospholipases.glycerophosphodiester phosphodiesterase'	recognition of pollen; LOCATED IN: plasma membrane; EXPRESSED IN: 23 plant structures; EXPRESSED DURING: 13 growth stages; CONTAINS InterPro DOMAIN/s: Curculin-like (mannose-binding) lectin (InterPro:IPR001480)
Medtr4g073230	'11.9.3.3'	'lipid metabolism.lipid degradation.lysophospholipases.glycerophosphodiester phosphodiesterase'	ATP binding site (InterPro:IPR017441)
Medtr5g094230	'11.9.3.3'	'lipid metabolism.lipid degradation.lysophospholipases.glycerophosphodiester phosphodiesterase'	kinase activity; INVOLVED IN: glycerol metabolic process
Medtr3g099120	'11.9.3.5'	'lipid metabolism.lipid degradation.lysophospholipases.phosphoinositide phospholipase C'	acting on ester bonds; LOCATED IN: endomembrane system; EXPRESSED IN: 22 plant structures; EXPRESSED DURING: 13 growth stages; CONTAINS InterPro DOMAIN/s: Phosphoesterase (InterPro:IPR007312); BEST Arabidopsis thaliana protein match is: non-specific phospholipase C1 (TAIR:AT1G07230.1); Has 2244 Blast hits to 2129 proteins in 399 species: Archae - 32; Bacteria - 1880; Metazoa - 0; Fungi - 127; Pla…
Medtr2g086090	'11.9.4.13'	'lipid metabolism.lipid degradation.beta-oxidation.acyl CoA reductase'	involved in cuticular wax biosynthesis. Lines carrying recessive mutations are deficient in primary alcohol and have glossy stem surfaces.; ECERIFERUM 4 (CER4); FUNCTIONS IN: oxidoreductase activity
Medtr4g086020	'12.1.2'	'N-metabolism.nitrate metabolism.nitrite reductase'	chloroplast precursor (EC 1.7.7.1) - Betula verrucosa (White birch) (Betula pendula) & (at2g15620 : 977.0) Involved in the second step of nitrate assimilation. Its expression is induced by nitrate.; nitrite reductase 1 (NIR1); FUNCTIONS IN: ferredoxin-nitrate reductase activity
Medtr7g089970	'12.2.1.1'	'N-metabolism.ammonia metabolism.glutamate synthase.ferredoxin dependent'	glutamate synthase (ferredoxin) activity; INVOLVED IN: response to light stimulus
Medtr2g021242	'12.2.2'	'N-metabolism.ammonia metabolism.glutamine synthetase'	chloroplast precursor (EC 6.3.1.2) (Glutamate--ammonia ligase) (Chloroplast GS2) - Medicago sativa (Alfalfa) & (at5g35630 : 640.0) chloroplastic glutamine synthetase; glutamine synthetase 2 (GS2); FUNCTIONS IN: glutamate-ammonia ligase activity; INVOLVED IN: in 8 processes; LOCATED IN: in 6 components; EXPRESSED IN: 23 plant structures; EXPRESSED DURING: 14 growth stages; CONTAINS InterPro DOMAIN…
Medtr2g021255	'12.2.2'	'N-metabolism.ammonia metabolism.glutamine synthetase'	chloroplast precursor (EC 6.3.1.2) (Glutamate--ammonia ligase) (Chloroplast GS2) - Medicago sativa (Alfalfa) & (at5g35630 : 691.0) chloroplastic glutamine synthetase; glutamine synthetase 2 (GS2); FUNCTIONS IN: glutamate-ammonia ligase activity; INVOLVED IN: in 8 processes; LOCATED IN: in 6 components; EXPRESSED IN: 23 plant structures; EXPRESSED DURING: 14 growth stages; CONTAINS InterPro DOMAIN…
Medtr8g067420	'12.4'	'N-metabolism.misc'	FAD binding
Medtr3g112050	'13.1.2.3.21'	'amino acid metabolism.synthesis.glutamate family.arginine.ornithine carbamoyltransferase'	chloroplast precursor (EC 2.1.3.3) (OTCase) (Ornithine transcarbamylase) - Pisum sativum (Garden pea) & (at1g75330 : 508.0) ornithine carbamoyltransferase (OTC); FUNCTIONS IN: amino acid binding
Medtr1g012540	'13.1.2.3.3'	'amino acid metabolism.synthesis.glutamate family.arginine.N-Acetylglutamate-5-P reductase'	acting on the aldehyde or oxo group of donors
Medtr2g103300	'13.1.2.3.31'	'amino acid metabolism.synthesis.glutamate family.arginine.aspartate racemase'	acting on amino acids and derivatives; INVOLVED IN: metabolic process
Medtr4g114000	'13.1.2.3.31'	'amino acid metabolism.synthesis.glutamate family.arginine.aspartate racemase'	acting on amino acids and derivatives; INVOLVED IN: metabolic process
Medtr4g123810	'13.1.3.4'	'amino acid metabolism.synthesis.aspartate family.methionine'	response to cold
Medtr7g011230	'13.1.3.4.1'	'amino acid metabolism.synthesis.aspartate family.methionine.cystathionine gamma-synthase'	which performs the first committed step in methionine biosynthesis. A conserved motif of 13 amino acids in the first exon is required for posttranscriptional autoregulation. This enzyme shares the same substrate as threonine synthase (TS) and its absence transcriptionally affects 8 genes in the genome.; METHIONINE OVERACCUMULATION 1 (MTO1); FUNCTIONS IN: cystathionine gamma-synthase activity; INV…
Medtr2g450530	'13.1.3.4.12'	'amino acid metabolism.synthesis.aspartate family.methionine.homocysteine S-methyltransferase'	plastoglobule; EXPRESSED IN: 21 plant structures; EXPRESSED DURING: 12 growth stages; CONTAINS InterPro DOMAIN/s: Methyltransferase type 11 (InterPro:IPR013216); BEST Arabidopsis thaliana protein match is: S-adenosyl-L-methionine-dependent methyltransferases superfamily protein (TAIR:AT1G78140.1); Has 8121 Blast hits to 8118 proteins in 1828 species: Archae - 365; Bacteria - 6420; Metazoa - 92; F…
Medtr1g101400	'13.1.3.5.2'	'amino acid metabolism.synthesis.aspartate family.lysine.dihydrodipicolinate reductase'	which is involved in electron transfer between PSII and PSI. Likely functions in biogenesis or stabilization of the NAD(P)H dehydrogenase complex.; chlororespiration reduction 1 (crr1); FUNCTIONS IN: dihydrodipicolinate reductase activity; INVOLVED IN: photosynthesis
Medtr8g028145	'13.1.3.5.2'	'amino acid metabolism.synthesis.aspartate family.lysine.dihydrodipicolinate reductase'	bacterial/plant; FUNCTIONS IN: dihydrodipicolinate reductase activity; INVOLVED IN: oxidation reduction
Medtr8g105860	'13.1.3.6.1.2'	'amino acid metabolism.synthesis.aspartate family.misc.homoserine.aspartate semialdehyde dehydrogenase'	which produces the branch point intermediate for lysine and threonine/methionine biosynthesis; semialdehyde dehydrogenase family protein; FUNCTIONS IN: oxidoreductase activity
Medtr5g099180	'13.1.3.6.1.4'	'amino acid metabolism.synthesis.aspartate family.misc.homoserine.homoserine kinase'	a compound at the branching point of methionine and threonine biosynthesis. HSK is found in the stromal fraction of chloroplasts. Mutants are susceptible to downy mildew fungus Hyaloperonospora parasitica.; homoserine kinase (HSK); FUNCTIONS IN: homoserine kinase activity; INVOLVED IN: methionine biosynthetic process
Medtr3g099190	'13.1.4.1.1'	'amino acid metabolism.synthesis.branched chain group.common.acetolactate synthase'	chloroplast precursor (EC 2.2.1.6) (Acetolactate synthase II) (Acetohydroxy-acid synthase II) (ALS II) - Nicotiana tabacum (Common tobacco) & (at3g48560 : 1022.0) Catalyzes the formation of acetolactate from pyruvate
[truncated: 1,788 more rows]

## Sheet: 1 profile dark mapman
IDENTIFIER	BINCODE	NAME Mapman annotation	TYPE
Medtr4g075040	'1.1.1.3'	'PS.lightreaction.photosystem II.biogenesis'	plastid organization
Medtr5g017080	'1.1.30'	'PS.lightreaction.state transition'	protein kinase activity
[truncated: 465 more rows]

## Sheet: 2 profile dark mapman
IDENTIFIER	BINCODE	NAME Mapman annotation	TYPE
[truncated: 775 more rows]

[truncated: 8 more sheets: 3 profile dark mapman, 6 profile dark mapman, 18 profile dark mapman, Combined 23-39 dark mapman, 23 profile dark mapman, 35 profile dark mapman, 37 profile dark mapman, 39 profile dark mapman]
