# Supplementary material for: Transcriptional Programs and Regulators Underlying Age-Dependent and Dark-Induced Senescence in Medicago truncatula
Source: Cells. 2022 May 6;11(9):1570. doi: 10.3390/cells11091570 (PMC9103780; doi:10.3390/cells11091570)
Supplement: Supplementary file 1 [file cells-11-01570-s001.zip › Supplementary Dataset S7. GO terms based on STEM clusters of DE genes during dark-induced senescence.xlsx]

## Sheet: 0 profile dark GO
REG-MAP				REVIGO
GO.ID	p-value	Description		GO. ID	log10 p-value	Description
GO:0044281	1e-10	small molecule metabolic process		GO:0008152	-2.1331	metabolic process
GO:1901564	8.9e-10	organonitrogen compound metabolic process		GO:0009071	-6.4949	serine family amino acid catabolic process
GO:0019752	9.5e-10	carboxylic acid metabolic process		GO:0009628	-8.7696	response to abiotic stimulus
GO:0009628	1.7e-09	response to abiotic stimulus		GO:0009987	-3.1135	cellular process
GO:0043436	1.8e-09	oxoacid metabolic process		GO:0044699	-3.2147	single-organism process
GO:0006082	2e-09	organic acid metabolic process		GO:0050896	-4.0044	response to stimulus
GO:0044711	5.7e-09	single-organism biosynthetic process		GO:0009058	-2.1163	biosynthetic process
GO:0044283	2e-08	small molecule biosynthetic process		GO:0009834	-3.5376	plant-type secondary cell wall biogenesis
GO:0042221	4.3e-08	response to chemical		GO:0046484	-2.4377	oxazole or thiazole metabolic process
GO:0044710	4.5e-08	single-organism metabolic process		GO:1901615	-3.9586	organic hydroxy compound metabolic process
GO:0009071	3.2e-07	serine family amino acid catabolic process		GO:0009765	-2.8416	photosynthesis, light harvesting
GO:0044723	3.3e-07	single-organism carbohydrate metabolic process		GO:0018298	-4.6576	protein-chromophore linkage
GO:0015979	3.7e-07	photosynthesis		GO:1901617	-4.1739	organic hydroxy compound biosynthetic process
GO:0010038	3.9e-07	response to metal ion		GO:2000012	-2.6968	regulation of auxin polar transport
GO:0044763	4.4e-07	single-organism cellular process		GO:0015979	-6.4318	photosynthesis
GO:0072524	6.3e-07	pyridine-containing compound metabolic process		GO:0005975	-3.5528	carbohydrate metabolic process
GO:0046939	6.8e-07	nucleotide phosphorylation		GO:0006732	-4.5528	coenzyme metabolic process
GO:0032787	7.7e-07	monocarboxylic acid metabolic process		GO:0006790	-2.8153	sulfur compound metabolic process
GO:0044724	8.3e-07	single-organism carbohydrate catabolic process		GO:0006091	-4.3098	generation of precursor metabolites and energy
GO:0006165	8.9e-07	nucleoside diphosphate phosphorylation		GO:0051186	-4.9208	cofactor metabolic process
GO:0046686	1.1e-06	response to cadmium ion		GO:0009853	-2.2381	photorespiration
GO:0006090	1.8e-06	pyruvate metabolic process		GO:0009698	-2.6289	phenylpropanoid metabolic process
GO:0006096	1.9e-06	glycolytic process		GO:0030856	-2.4377	regulation of epithelial cell differentiation
GO:0006757	1.9e-06	ATP generation from ADP		GO:1901564	-9.0506	organonitrogen compound metabolic process
GO:0046031	1.9e-06	ADP metabolic process		GO:0044723	-6.4815	single-organism carbohydrate metabolic process
GO:0010035	2.3e-06	response to inorganic substance		GO:0019748	-3.1805	secondary metabolic process
GO:0009135	3e-06	purine nucleoside diphosphate metabolic process		GO:0046184	-3.1192	aldehyde biosynthetic process
GO:0009179	3e-06	purine ribonucleoside diphosphate metabolic process		GO:0044272	-2.585	sulfur compound biosynthetic process
GO:0009185	3e-06	ribonucleoside diphosphate metabolic process		GO:0016441	-2.3686	posttranscriptional gene silencing
GO:0009132	6.9e-06	nucleoside diphosphate metabolic process		GO:0015833	-2.6757	peptide transport
GO:1901566	7.9e-06	organonitrogen compound biosynthetic process		GO:0044710	-7.3468	single-organism metabolic process
GO:0051186	1.2e-05	cofactor metabolic process		GO:0006081	-3.8861	cellular aldehyde metabolic process
GO:0016053	1.3e-05	organic acid biosynthetic process		GO:0006629	-2.1506	lipid metabolic process
GO:0046394	1.3e-05	carboxylic acid biosynthetic process		GO:0009658	-2.9066	chloroplast organization
GO:0046496	1.3e-05	nicotinamide nucleotide metabolic process		GO:0072524	-6.2007	pyridine-containing compound metabolic process
GO:0019362	1.5e-05	pyridine nucleotide metabolic process		GO:0010731	-3.6576	protein glutathionylation
GO:0018298	2.2e-05	protein-chromophore linkage		GO:0031408	-3.5528	oxylipin biosynthetic process
GO:1901605	2.4e-05	alpha-amino acid metabolic process		GO:0046939	-6.1675	nucleotide phosphorylation
GO:0006732	2.8e-05	coenzyme metabolic process		GO:0006820	-2.3391	anion transport
GO:0006733	3e-05	oxidoreduction coenzyme metabolic process		GO:0044281	-10	small molecule metabolic process
GO:0055114	3.3e-05	oxidation-reduction process		GO:0010608	-2.104	posttranscriptional regulation of gene expression
GO:0006091	4.9e-05	generation of precursor metabolites and energy		GO:0009611	-2.2676	response to wounding
GO:0006546	6.3e-05	glycine catabolic process		GO:0090063	-2.4377	positive regulation of microtubule nucleation
GO:1901617	6.7e-05	organic hydroxy compound biosynthetic process		GO:0010038	-6.4089	response to metal ion
GO:0009409	8.9e-05	response to cold		GO:0009617	-2.3188	response to bacterium
GO:0034637	9.1e-05	cellular carbohydrate biosynthetic process		GO:0009266	-3.7696	response to temperature stimulus
GO:0050896	9.9e-05	response to stimulus		GO:0044763	-6.3565	single-organism cellular process
GO:0009735	0.00011	response to cytokinin		GO:0009607	-2.3036	response to biotic stimulus
GO:1901615	0.00011	organic hydroxy compound metabolic process		GO:0006766	-3.5686	vitamin metabolic process
GO:0006081	0.00013	cellular aldehyde metabolic process		GO:0000741	-2.1415	karyogamy
GO:0016051	0.00014	carbohydrate biosynthetic process		GO:0009719	-2.0768	response to endogenous stimulus
GO:0044264	0.00015	cellular polysaccharide metabolic process		GO:0072521	-2.0074	purine-containing compound metabolic process
GO:0006520	0.00016	cellular amino acid metabolic process		GO:0009657	-3.1079	plastid organization
GO:0009266	0.00017	response to temperature stimulus		GO:0015729	-2.4377	oxaloacetate transport
GO:0009110	0.00019	vitamin biosynthetic process		GO:0044711	-8.2441	single-organism biosynthetic process
GO:0042364	0.00019	water-soluble vitamin biosynthetic process		GO:0019725	-2.1524	cellular homeostasis
GO:0010731	0.00022	protein glutathionylation		GO:0055114	-4.4815	oxidation-reduction process
GO:0080167	0.00024	response to karrikin		GO:0032787	-6.1135	monocarboxylic acid metabolic process
GO:0006766	0.00027	vitamin metabolic process		GO:0042221	-7.3665	response to chemical
GO:0005975	0.00028	carbohydrate metabolic process		GO:0009735	-3.9586	response to cytokinin
GO:0031408	0.00028	oxylipin biosynthetic process		GO:0019637	-3.2676	organophosphate metabolic process
GO:0006767	0.00029	water-soluble vitamin metabolic process		GO:1901576	-2.06	organic substance biosynthetic process
GO:0009834	0.00029	plant-type secondary cell wall biogenesis		GO:0030244	-3.2757	cellulose biosynthetic process
GO:1901698	0.00033	response to nitrogen compound		GO:0055086	-2.4572	nucleobase-containing small molecule metabolic process
GO:0006073	0.00033	cellular glucan metabolic process		GO:0008610	-2.9957	lipid biosynthetic process
GO:0044042	0.00033	glucan metabolic process		GO:0031407	-3.4559	oxylipin metabolic process
GO:0031407	0.00035	oxylipin metabolic process		GO:0015689	-2.1931	molybdate ion transport
GO:0044262	0.00037	cellular carbohydrate metabolic process		GO:0034285	-2.4214	response to disaccharide
GO:0009228	0.0004	thiamine biosynthetic process		GO:1901566	-5.1024	organonitrogen compound biosynthetic process
GO:0042724	0.0004	thiamine-containing compound biosynthetic process		GO:0071669	-2.3188	plant-type cell wall organization or biogenesis
GO:0000271	0.00043	polysaccharide biosynthetic process		GO:0006090	-5.7447	pyruvate metabolic process
GO:0033692	0.00045	cellular polysaccharide biosynthetic process		GO:0006541	-2.9393	glutamine metabolic process
GO:0009416	0.00049	response to light stimulus		GO:0042761	-2.1931	very long-chain fatty acid biosynthetic process
GO:0030244	0.00053	cellulose biosynthetic process		GO:0010035	-5.6383	response to inorganic substance
GO:0019637	0.00054	organophosphate metabolic process		GO:0009093	-2.4377	cysteine catabolic process
GO:0009314	0.00055	response to radiation		GO:0019249	-2.4377	lactate biosynthetic process
GO:0044699	0.00061	single-organism process		GO:1901698	-3.4815	response to nitrogen compound
GO:0019748	0.00066	secondary metabolic process		GO:0052837	-2.4377	thiazole biosynthetic process
GO:0046184	0.00076	aldehyde biosynthetic process		GO:0010196	-2.1931	nonphotochemical quenching
GO:0009987	0.00077	cellular process		GO:1990066	-2.1931	energy quenching
GO:0009657	0.00078	plastid organization		GO:0006082	-8.699	organic acid metabolic process
GO:0009250	0.00086	glucan biosynthetic process		GO:0005983	-2.3526	starch catabolic process
GO:0030243	0.00096	cellulose metabolic process		GO:0009069	-2.6271	serine family amino acid metabolic process
GO:0008610	0.00101	lipid biosynthetic process		GO:0045682	-2.4377	regulation of epidermis development
GO:0005982	0.00108	starch metabolic process		GO:0009132	-5.1612	nucleoside diphosphate metabolic process
GO:0006541	0.00115	glutamine metabolic process		GO:0010114	-2.1537	response to red light
GO:0009658	0.00124	chloroplast organization		GO:0042538	-2.433	hyperosmotic salinity response
GO:0006772	0.00131	thiamine metabolic process		GO:0046394	-4.8861	carboxylic acid biosynthetic process
GO:0042723	0.00131	thiamine-containing compound metabolic process		GO:0010033	-2.762	response to organic substance
GO:0009117	0.00142	nucleotide metabolic process		GO:0080167	-3.6198	response to karrikin
GO:0009765	0.00144	photosynthesis, light harvesting		GO:0044724	-6.0809	single-organism carbohydrate catabolic process
GO:0006790	0.00153	sulfur compound metabolic process		GO:0044283	-7.699	small molecule biosynthetic process
GO:0072330	0.00158	monocarboxylic acid biosynthetic process		GO:0005982	-2.9666	starch metabolic process
GO:0010033	0.00173	response to organic substance		GO:0010243	-2.0706	response to organonitrogen compound
GO:0042816	0.00201	vitamin B6 metabolic process		GO:1901700	-2.6882	response to oxygen-containing compound
GO:0042819	0.00201	vitamin B6 biosynthetic process		GO:0044712	-2.6364	single-organism catabolic process
GO:2000012	0.00201	regulation of auxin polar transport		GO:1901605	-4.6198	alpha-amino acid metabolic process
GO:1901700	0.00205	response to oxygen-containing compound		GO:0042886	-2.0297	amide transport
GO:0006857	0.00211	oligopeptide transport		GO:0044262	-3.4318	cellular carbohydrate metabolic process
GO:0015833	0.00211	peptide transport
GO:0044712	0.00231	single-organism catabolic process
GO:0009698	0.00235	phenylpropanoid metabolic process
GO:0009069	0.00236	serine family amino acid metabolic process
GO:0044272	0.0026	sulfur compound biosynthetic process
GO:0006753	0.00275	nucleoside phosphate metabolic process
GO:0044255	0.00298	cellular lipid metabolic process
GO:0055086	0.00349	nucleobase-containing small molecule metabolic process
GO:0009093	0.00365	cysteine catabolic process
GO:0010968	0.00365	regulation of microtubule nucleation
GO:0015729	0.00365	oxaloacetate transport
GO:0018131	0.00365	oxazole or thiazole biosynthetic process
GO:0019249	0.00365	lactate biosynthetic process
GO:0030856	0.00365	regulation of epithelial cell differentiation
GO:0045604	0.00365	regulation of epidermal cell differentiation
GO:0045682	0.00365	regulation of epidermis development
GO:0046484	0.00365	oxazole or thiazole metabolic process
GO:0052837	0.00365	thiazole biosynthetic process
GO:0052838	0.00365	thiazole metabolic process
GO:0071423	0.00365	malate transmembrane transport
GO:0090063	0.00365	positive regulation of microtubule nucleation
GO:0042538	0.00369	hyperosmotic salinity response
GO:0034285	0.00379	response to disaccharide
GO:0051274	0.0038	beta-glucan biosynthetic process
GO:0009768	0.00384	photosynthesis, light harvesting in photosystem I
GO:0006633	0.00398	fatty acid biosynthetic process
GO:0016441	0.00428	posttranscriptional gene silencing
GO:0005983	0.00444	starch catabolic process
GO:0045454	0.00456	cell redox homeostasis
GO:0006820	0.00458	anion transport
GO:0051273	0.00463	beta-glucan metabolic process
GO:0071669	0.0048	plant-type cell wall organization or biogenesis
GO:0009617	0.0048	response to bacterium
GO:0009607	0.00497	response to biotic stimulus
GO:0072528	0.00507	pyrimidine-containing compound biosynthetic process
GO:0016052	0.00539	carbohydrate catabolic process
GO:0009611	0.0054	response to wounding
GO:0009853	0.00578	photorespiration
GO:0009144	0.00592	purine nucleoside triphosphate metabolic process
GO:0009205	0.00592	purine ribonucleoside triphosphate metabolic process
GO:0006631	0.00598	fatty acid metabolic process
GO:0010196	0.00641	nonphotochemical quenching
GO:0015689	0.00641	molybdate ion transport
GO:0042761	0.00641	very long-chain fatty acid biosynthetic process
GO:0042822	0.00641	pyridoxal phosphate metabolic process
GO:0042823	0.00641	pyridoxal phosphate biosynthetic process
GO:1990066	0.00641	energy quenching
GO:0019693	0.00662	ribose phosphate metabolic process
GO:0044275	0.00665	cellular carbohydrate catabolic process
GO:0006163	0.00667	purine nucleotide metabolic process
GO:0009064	0.00669	glutamine family amino acid metabolic process
GO:0010114	0.00702	response to red light
GO:0019725	0.00704	cellular homeostasis
GO:0009116	0.00706	nucleoside metabolic process
GO:0006629	0.00707	lipid metabolic process
GO:0008652	0.00708	cellular amino acid biosynthetic process
GO:0051188	0.00714	cofactor biosynthetic process
GO:1901607	0.00716	alpha-amino acid biosynthetic process
GO:0009832	0.00717	plant-type cell wall biogenesis
GO:0000741	0.00722	karyogamy
GO:0009559	0.00722	embryo sac central cell differentiation
GO:0010197	0.00722	polar nucleus fusion
GO:0008152	0.00736	metabolic process
GO:0009637	0.00757	response to blue light
GO:0046165	0.00757	alcohol biosynthetic process
GO:0009058	0.00765	biosynthetic process
GO:0010608	0.00787	posttranscriptional regulation of gene expression
GO:0006972	0.00812	hyperosmotic response
GO:0006544	0.00815	glycine metabolic process
GO:0009082	0.00815	branched-chain amino acid biosynthetic process
GO:0010218	0.00817	response to far red light
GO:0009719	0.00838	response to endogenous stimulus
GO:0010243	0.0085	response to organonitrogen compound
GO:0006970	0.00855	response to osmotic stress
GO:1901576	0.00871	organic substance biosynthetic process
GO:0043207	0.009	response to external biotic stimulus
GO:0051707	0.009	response to other organism
GO:0042886	0.00934	amide transport
GO:0009199	0.00964	ribonucleoside triphosphate metabolic process
GO:0046034	0.00978	ATP metabolic process
GO:0006089	0.0098	lactate metabolic process
GO:0061727	0.0098	methylglyoxal catabolic process to lactate
GO:0072521	0.00983	purine-containing compound metabolic process

## Sheet: 1 profile dark GO
REG-MAP				REVIGO
GO.ID	p-value	Description		GO. ID	log10 p-value	Description
GO:0006073	2.2e-05	cellular glucan metabolic process		GO:0006073	-4.6576	cellular glucan metabolic process
GO:0044042	2.2e-05	glucan metabolic process		GO:0009266	-3.3468	response to temperature stimulus
GO:0005982	3.2e-05	starch metabolic process		GO:0042335	-2.4622	cuticle development
GO:0044264	0.00011	cellular polysaccharide metabolic process		GO:0098656	-2.8013	anion transmembrane transport
GO:0010206	0.00015	photosystem II repair		GO:0009657	-3.3188	plastid organization
GO:0030091	0.0003	protein repair		GO:0019725	-2.4123	cellular homeostasis
GO:0005976	0.00032	polysaccharide metabolic process		GO:0030091	-3.5229	protein repair
GO:0009409	0.00034	response to cold		GO:0044763	-2.9101	single-organism cellular process
GO:0009266	0.00045	response to temperature stimulus		GO:0006207	-2.0039	'de novo' pyrimidine nucleobase biosynthetic process
GO:0009657	0.00048	plastid organization		GO:0010206	-3.8239	photosystem II repair
GO:0009250	0.00049	glucan biosynthetic process		GO:0044711	-2.6968	single-organism biosynthetic process
GO:0009765	0.0011	photosynthesis, light harvesting		GO:0009735	-2.2596	response to cytokinin
GO:0044763	0.00123	single-organism cellular process		GO:0072348	-2.3526	sulfur compound transport
GO:0005977	0.00133	glycogen metabolic process		GO:0009628	-2.3851	response to abiotic stimulus
GO:0006112	0.00133	energy reserve metabolic process		GO:0006109	-2.1612	regulation of carbohydrate metabolic process
GO:0000271	0.00158	polysaccharide biosynthetic process		GO:0006112	-2.8761	energy reserve metabolic process
GO:0098656	0.00158	anion transmembrane transport		GO:0009750	-2.0867	response to fructose
GO:0008272	0.0019	sulfate transport		GO:0005976	-3.4949	polysaccharide metabolic process
GO:0044711	0.00201	single-organism biosynthetic process		GO:0044262	-2.5031	cellular carbohydrate metabolic process
GO:0019252	0.00261	starch biosynthetic process		GO:0014070	-2.1439	response to organic cyclic compound
GO:0033692	0.00286	cellular polysaccharide biosynthetic process		GO:0016051	-2.4123	carbohydrate biosynthetic process
GO:0044262	0.00314	cellular carbohydrate metabolic process		GO:0010286	-2.0773	heat acclimation
GO:0042335	0.00345	cuticle development		GO:0008272	-2.7212	sulfate transport
GO:0016051	0.00387	carbohydrate biosynthetic process
GO:0019725	0.00387	cellular homeostasis
GO:0009628	0.00412	response to abiotic stimulus
GO:0072348	0.00444	sulfur compound transport
GO:0009735	0.0055	response to cytokinin
GO:0048545	0.00622	response to steroid hormone
GO:0009416	0.00647	response to light stimulus
GO:0006109	0.0069	regulation of carbohydrate metabolic process
GO:0014070	0.00718	response to organic cyclic compound
GO:0005978	0.00819	glycogen biosynthetic process
GO:0009750	0.00819	response to fructose
GO:0071456	0.00819	cellular response to hypoxia
GO:0045454	0.00825	cell redox homeostasis
GO:0010286	0.00837	heat acclimation
GO:0009314	0.00856	response to radiation
GO:0006207	0.00991	'de novo' pyrimidine nucleobase biosynthetic process

## Sheet: 2 profile dark GO
REG-MAP				REVIGO
GO.ID	p-value	Description		GO. ID	log10 p-value	Description
GO:0015979	1.4e-14	photosynthesis		GO:0008152	-2.4089	metabolic process
GO:0019684	2.4e-09	photosynthesis, light reaction		GO:0015979	-13.8539	photosynthesis
GO:0006091	8.3e-08	generation of precursor metabolites and energy		GO:0070272	-2.7799	proton-transporting ATP synthase complex biogenesis
GO:0009767	9.8e-08	photosynthetic electron transport chain		GO:0005976	-2.2343	polysaccharide metabolic process
GO:0022900	5e-06	electron transport chain		GO:0009755	-3.7212	hormone-mediated signaling pathway
GO:0009773	8.1e-06	photosynthetic electron transport in photosystem I		GO:0019684	-8.6198	photosynthesis, light reaction
GO:0010109	2.6e-05	regulation of photosynthesis		GO:0043605	-2.4868	cellular amide catabolic process
GO:0009755	0.00019	hormone-mediated signaling pathway		GO:0048569	-3.4949	post-embryonic animal organ development
GO:0048569	0.00032	post-embryonic organ development		GO:0006091	-7.0809	generation of precursor metabolites and energy
GO:0042548	0.00073	regulation of photosynthesis, light reaction		GO:0043647	-2.4023	inositol phosphate metabolic process
GO:0032870	0.00085	cellular response to hormone stimulus		GO:0005975	-2.3768	carbohydrate metabolic process
GO:0071310	0.00085	cellular response to organic substance		GO:0009698	-2.3098	phenylpropanoid metabolic process
GO:0043467	0.00091	regulation of generation of precursor metabolites and energy		GO:0009416	-2.9586	response to light stimulus
GO:0071495	0.00097	cellular response to endogenous stimulus		GO:0010158	-2.1024	abaxial cell fate specification
GO:0009416	0.0011	response to light stimulus		GO:0009966	-2.5058	regulation of signal transduction
GO:0070272	0.00166	proton-transporting ATP synthase complex biogenesis		GO:0043467	-3.041	regulation of generation of precursor metabolites and energy
GO:0080005	0.00166	photosystem stoichiometry adjustment		GO:0010646	-2.3716	regulation of cell communication
GO:0009314	0.0017	response to radiation		GO:0060429	-2.153	epithelium development
GO:0071229	0.00256	cellular response to acid chemical		GO:0023051	-2.4597	regulation of signaling
GO:0048438	0.00266	floral whorl development		GO:0009908	-2.3635	flower development
GO:0070887	0.00271	cellular response to chemical stimulus		GO:0045165	-2.0395	cell fate commitment
GO:0048513	0.00273	organ development		GO:0009958	-2.3125	positive gravitropism
GO:0009411	0.00288	response to UV		GO:0044262	-2.1379	cellular carbohydrate metabolic process
GO:0009740	0.00308	gibberellic acid mediated signaling pathway		GO:0070887	-2.567	cellular response to chemical stimulus
GO:0010476	0.00308	gibberellin mediated signaling pathway		GO:0022900	-5.301	electron transport chain
GO:0009966	0.00312	regulation of signal transduction		GO:0010065	-2.1024	primary meristem tissue development
GO:0043605	0.00326	cellular amide catabolic process		GO:0043623	-2.4377	cellular protein complex assembly
GO:0023051	0.00347	regulation of signaling		GO:0071229	-2.5918	cellular response to acid chemical
GO:0071370	0.00355	cellular response to gibberellin stimulus		GO:0048513	-2.5638	animal organ development
GO:0043623	0.00365	cellular protein complex assembly
GO:0048437	0.00376	floral organ development
GO:0008152	0.0039	metabolic process
GO:0043647	0.00396	inositol phosphate metabolic process
GO:0005975	0.0042	carbohydrate metabolic process
GO:0010646	0.00425	regulation of cell communication
GO:0009908	0.00433	flower development
GO:0009958	0.00487	positive gravitropism
GO:0009698	0.0049	phenylpropanoid metabolic process
GO:0010315	0.00535	auxin efflux
GO:0009637	0.00542	response to blue light
GO:0005976	0.00583	polysaccharide metabolic process
GO:0071482	0.00584	cellular response to light stimulus
GO:0090567	0.00587	reproductive shoot system development
GO:0060429	0.00703	epithelium development
GO:0044262	0.00728	cellular carbohydrate metabolic process
GO:0009734	0.00746	auxin-activated signaling pathway
GO:0009808	0.00762	lignin metabolic process
GO:0071478	0.00767	cellular response to radiation
GO:0071396	0.00778	cellular response to lipid
GO:0010065	0.0079	primary meristem tissue development
GO:0010158	0.0079	abaxial cell fate specification
GO:0045165	0.00913	cell fate commitment

## Sheet: 3 profile dark GO
REG-MAP				REVIGO
GO.ID	p-value	Description		GO. ID	log10 p-value	Description
GO:0044711	1e-06	single-organism biosynthetic process		GO:0042372	-5.5376	phylloquinone biosynthetic process
GO:0042372	2.9e-06	phylloquinone biosynthetic process		GO:0044699	-3.6778	single-organism process
GO:0042374	2.9e-06	phylloquinone metabolic process		GO:0010166	-2.5452	wax metabolic process
GO:0044710	1.5e-05	single-organism metabolic process		GO:0009058	-2.0768	biosynthetic process
GO:0006721	5.7e-05	terpenoid metabolic process		GO:0071482	-3.7447	cellular response to light stimulus
GO:0055114	6.4e-05	oxidation-reduction process		GO:0009657	-3.301	plastid organization
GO:0016051	0.00011	carbohydrate biosynthetic process		GO:0071554	-2.8894	cell wall organization or biogenesis
GO:0006720	0.00015	isoprenoid metabolic process		GO:0031425	-3.0088	chloroplast RNA processing
GO:0034637	0.00018	cellular carbohydrate biosynthetic process		GO:0051186	-3.4815	cofactor metabolic process
GO:0051188	0.00018	cofactor biosynthetic process		GO:0072348	-3.1612	sulfur compound transport
GO:0071482	0.00018	cellular response to light stimulus		GO:0019684	-2.3893	photosynthesis, light reaction
GO:0044699	0.00021	single-organism process		GO:0042743	-2.7144	hydrogen peroxide metabolic process
GO:0071478	0.00025	cellular response to radiation		GO:0072593	-3.0223	reactive oxygen species metabolic process
GO:0051186	0.00033	cofactor metabolic process		GO:0010025	-2.6234	wax biosynthetic process
GO:0009657	0.0005	plastid organization		GO:0006721	-4.2441	terpenoid metabolic process
GO:0071214	0.00066	cellular response to abiotic stimulus		GO:0051053	-2.8013	negative regulation of DNA metabolic process
GO:0044264	0.00068	cellular polysaccharide metabolic process		GO:0042440	-3.0315	pigment metabolic process
GO:0072348	0.00069	sulfur compound transport		GO:0046148	-2.342	pigment biosynthetic process
GO:0080167	0.0008	response to karrikin		GO:0070681	-3.0605	glutaminyl-tRNAGln biosynthesis via transamidation
GO:0044262	0.00081	cellular carbohydrate metabolic process		GO:0034308	-2.2343	primary alcohol metabolic process
GO:0006820	0.00082	anion transport		GO:0040008	-2.7721	regulation of growth
GO:0070681	0.00087	glutaminyl-tRNAGln biosynthesis via transamidation		GO:0033013	-2.5421	tetrapyrrole metabolic process
GO:0042440	0.00093	pigment metabolic process		GO:0044711	-6	single-organism biosynthetic process
GO:0072593	0.00095	reactive oxygen species metabolic process		GO:0044710	-4.8239	single-organism metabolic process
GO:0031425	0.00098	chloroplast RNA processing		GO:0048522	-2.0788	positive regulation of cellular process
GO:0009416	0.00098	response to light stimulus		GO:0044106	-2.0526	cellular amine metabolic process
GO:1901661	0.00109	quinone metabolic process		GO:0016051	-3.9586	carbohydrate biosynthetic process
GO:1901663	0.00109	quinone biosynthetic process		GO:0009308	-2.4724	amine metabolic process
GO:1902358	0.00126	sulfate transmembrane transport		GO:0072525	-2.4023	pyridine-containing compound biosynthetic process
GO:0071554	0.00129	cell wall organization or biogenesis		GO:0006820	-3.0862	anion transport
GO:0009314	0.00144	response to radiation		GO:0009628	-2.4486	response to abiotic stimulus
GO:0042181	0.00144	ketone biosynthetic process		GO:0035436	-2.7645	triose phosphate transmembrane transport
GO:0044763	0.00147	single-organism cellular process		GO:0042886	-2.3197	amide transport
GO:0051053	0.00158	negative regulation of DNA metabolic process		GO:0010239	-2.7645	chloroplast mRNA processing
GO:0016108	0.00164	tetraterpenoid metabolic process		GO:0048518	-2.153	positive regulation of biological process
GO:0016116	0.00164	carotenoid metabolic process		GO:0044763	-2.8327	single-organism cellular process
GO:0040008	0.00169	regulation of growth		GO:0006979	-2.0429	response to oxidative stress
GO:0048638	0.0017	regulation of developmental growth		GO:0009658	-2.4724	chloroplast organization
GO:0010239	0.00172	chloroplast mRNA processing		GO:0055114	-4.1938	oxidation-reduction process
GO:0035436	0.00172	triose phosphate transmembrane transport		GO:0032543	-2.1146	mitochondrial translation
GO:0015994	0.00178	chlorophyll metabolic process		GO:0044281	-2.0747	small molecule metabolic process
GO:0042743	0.00193	hydrogen peroxide metabolic process		GO:0042873	-2.3757	aldonate transport
GO:0006778	0.00195	porphyrin-containing compound metabolic process		GO:0044249	-2.0052	cellular biosynthetic process
GO:0046351	0.0021	disaccharide biosynthetic process		GO:0051188	-3.7447	cofactor biosynthetic process
GO:0033692	0.00222	cellular polysaccharide biosynthetic process		GO:0010383	-2.3188	cell wall polysaccharide metabolic process
GO:0010025	0.00238	wax biosynthetic process		GO:0015717	-2.5467	triose phosphate transport
GO:0015713	0.00284	phosphoglycerate transport		GO:1902358	-2.8996	sulfate transmembrane transport
GO:0015717	0.00284	triose phosphate transport		GO:0044283	-2.0575	small molecule biosynthetic process
GO:0010166	0.00285	wax metabolic process		GO:0080167	-3.0969	response to karrikin
GO:0033013	0.00287	tetrapyrrole metabolic process		GO:0005976	-2.1945	polysaccharide metabolic process
GO:0015698	0.00323	inorganic anion transport		GO:0046351	-2.6778	disaccharide biosynthetic process
GO:0009308	0.00337	amine metabolic process		GO:0015713	-2.5467	phosphoglycerate transport
GO:0009658	0.00337	chloroplast organization		GO:0042374	-5.5376	phylloquinone metabolic process
GO:0008272	0.00338	sulfate transport		GO:0006720	-3.8239	isoprenoid metabolic process
GO:0009108	0.00354	coenzyme biosynthetic process		GO:0044262	-3.0915	cellular carbohydrate metabolic process
GO:0009628	0.00356	response to abiotic stimulus		GO:0015698	-2.4908	inorganic anion transport
GO:0042744	0.0039	hydrogen peroxide catabolic process		GO:0006778	-2.71	porphyrin-containing compound metabolic process
GO:0016114	0.00392	terpenoid biosynthetic process		GO:0044723	-2.1487	single-organism carbohydrate metabolic process
GO:0072525	0.00396	pyridine-containing compound biosynthetic process
GO:0010114	0.00397	response to red light
GO:0009639	0.00408	response to red or far red light
GO:0019684	0.00408	photosynthesis, light reaction
GO:0032876	0.00421	negative regulation of DNA endoreduplication
GO:0042873	0.00421	aldonate transport
GO:2000104	0.00421	negative regulation of DNA-dependent DNA replication
GO:0098656	0.00431	anion transmembrane transport
GO:0046148	0.00455	pigment biosynthetic process
GO:0098661	0.0046	inorganic anion transmembrane transport
GO:0042886	0.00479	amide transport
GO:0010383	0.0048	cell wall polysaccharide metabolic process
GO:0009312	0.00523	oligosaccharide biosynthetic process
GO:0000271	0.00539	polysaccharide biosynthetic process
GO:0009435	0.00583	NAD biosynthetic process
GO:0034308	0.00583	primary alcohol metabolic process
GO:0008299	0.00591	isoprenoid biosynthetic process
GO:0016109	0.00606	tetraterpenoid biosynthetic process
GO:0016117	0.00606	carotenoid biosynthetic process
GO:0005976	0.00639	polysaccharide metabolic process
GO:0042546	0.0065	cell wall biogenesis
GO:0006073	0.00691	cellular glucan metabolic process
GO:0044042	0.00691	glucan metabolic process
GO:0048518	0.00703	positive regulation of biological process
GO:0044723	0.0071	single-organism carbohydrate metabolic process
GO:0008156	0.00768	negative regulation of DNA replication
GO:0010206	0.00768	photosystem II repair
GO:0032543	0.00768	mitochondrial translation
GO:0046620	0.00768	regulation of organ growth
GO:0048522	0.00834	positive regulation of cellular process
GO:0009058	0.00838	biosynthetic process
GO:0044281	0.00842	small molecule metabolic process
GO:0071555	0.00865	cell wall organization
GO:0044283	0.00876	small molecule biosynthetic process
GO:0044106	0.00886	cellular amine metabolic process
GO:0006979	0.00906	response to oxidative stress
GO:0009408	0.0095	response to heat
GO:0005992	0.00973	trehalose biosynthetic process
GO:0044249	0.00988	cellular biosynthetic process

## Sheet: 6 profile dark GO
REG-MAP				REVIGO
GO.ID	p-value	Description		GO. ID	log10 p-value	Description
GO:0043603	7.6e-23	cellular amide metabolic process		GO:0008152	-3.5086	metabolic process
GO:0006518	4.6e-22	peptide metabolic process		GO:0009416	-3.699	response to light stimulus
GO:0043043	1.3e-21	peptide biosynthetic process		GO:0009451	-9.6576	RNA modification
GO:0006412	1.4e-21	translation		GO:0009987	-13.7959	cellular process
GO:0043604	8.6e-21	amide biosynthetic process		GO:0042254	-13.5528	ribosome biogenesis
GO:1901566	3.8e-19	organonitrogen compound biosynthetic process		GO:0008037	-4.585	cell recognition
GO:0044267	2.6e-16	cellular protein metabolic process		GO:0006457	-2.2175	protein folding
GO:1901564	6.1e-16	organonitrogen compound metabolic process		GO:0009768	-2.1878	photosynthesis, light harvesting in photosystem I
GO:0009987	1.6e-14	cellular process		GO:0015979	-3.2291	photosynthesis
GO:0042254	2.8e-14	ribosome biogenesis		GO:1901137	-3.2924	carbohydrate derivative biosynthetic process
GO:0044237	4e-14	cellular metabolic process		GO:0044237	-13.3979	cellular metabolic process
GO:0022613	6.8e-13	ribonucleoprotein complex biogenesis		GO:0009058	-7.1192	biosynthetic process
GO:0019538	7.1e-11	protein metabolic process		GO:0006807	-3.9208	nitrogen compound metabolic process
GO:0009451	2.2e-10	RNA modification		GO:0007154	-2.7986	cell communication
GO:0044260	6.4e-10	cellular macromolecule metabolic process		GO:0043170	-5.0757	macromolecule metabolic process
GO:0043412	6.4e-09	macromolecule modification		GO:0044238	-7	primary metabolic process
GO:0016310	4e-08	phosphorylation		GO:0071704	-6.5376	organic substance metabolic process
GO:0009058	7.6e-08	biosynthetic process		GO:1901135	-2.4306	carbohydrate derivative metabolic process
GO:0044238	1e-07	primary metabolic process		GO:0048544	-4.6383	recognition of pollen
GO:1901576	1.2e-07	organic substance biosynthetic process		GO:0006793	-5.8861	phosphorus metabolic process
GO:0044249	1.4e-07	cellular biosynthetic process		GO:0006730	-2.8013	one-carbon metabolic process
GO:0071704	2.9e-07	organic substance metabolic process		GO:0019538	-10.1487	protein metabolic process
GO:0034645	8.9e-07	cellular macromolecule biosynthetic process		GO:0043603	-22.1192	cellular amide metabolic process
GO:0006468	9.1e-07	protein phosphorylation		GO:0072522	-2.5302	purine-containing compound biosynthetic process
GO:0009059	1e-06	macromolecule biosynthetic process		GO:0071588	-2.2774	hydrogen peroxide mediated signaling pathway
GO:0006796	1e-06	phosphate-containing compound metabolic process		GO:0009870	-2.3883	defense response signaling pathway, resistance gene-dependent
GO:0006793	1.3e-06	phosphorus metabolic process		GO:0000959	-4.2596	mitochondrial RNA metabolic process
GO:0010467	1.7e-06	gene expression		GO:0010193	-2.0039	response to ozone
GO:0006364	1.8e-06	rRNA processing		GO:1901564	-15.2147	organonitrogen compound metabolic process
GO:0016072	2.2e-06	rRNA metabolic process		GO:0043412	-8.1938	macromolecule modification
GO:0016556	7.2e-06	mRNA modification		GO:0009628	-2.6615	response to abiotic stimulus
GO:0043170	8.4e-06	macromolecule metabolic process		GO:0016556	-5.1427	mRNA modification
GO:1900864	1.2e-05	mitochondrial RNA modification		GO:0016072	-5.6576	rRNA metabolic process
GO:0044271	1.3e-05	cellular nitrogen compound biosynthetic process		GO:0046394	-2.762	carboxylic acid biosynthetic process
GO:0048544	2.3e-05	recognition of pollen		GO:1901576	-6.9208	organic substance biosynthetic process
GO:0008037	2.6e-05	cell recognition		GO:0009664	-2.5528	plant-type cell wall organization
GO:0080156	2.8e-05	mitochondrial mRNA modification		GO:0044260	-9.1938	cellular macromolecule metabolic process
GO:0009875	3.8e-05	pollen-pistil interaction		GO:0009965	-2.0214	leaf morphogenesis
GO:0006464	4.1e-05	cellular protein modification process		GO:0034641	-3.9586	cellular nitrogen compound metabolic process
GO:0036211	4.1e-05	protein modification process		GO:0034660	-2.8327	ncRNA metabolic process
GO:0000959	5.5e-05	mitochondrial RNA metabolic process		GO:0010467	-5.7696	gene expression
GO:0034641	0.00011	cellular nitrogen compound metabolic process		GO:0009686	-2.067	gibberellin biosynthetic process
GO:0006807	0.00012	nitrogen compound metabolic process		GO:0043413	-2.5622	macromolecule glycosylation
GO:0034470	0.00013	ncRNA processing		GO:1900864	-4.9208	mitochondrial RNA modification
GO:0042274	0.0002	ribosomal small subunit biogenesis		GO:0046653	-2.5143	tetrahydrofolate metabolic process
GO:0009416	0.0002	response to light stimulus		GO:0042742	-2.0851	defense response to bacterium
GO:0044085	0.00023	cellular component biogenesis		GO:0009059	-6	macromolecule biosynthetic process
GO:0008152	0.00031	metabolic process		GO:0006412	-20.8539	translation
GO:0009314	0.00047	response to radiation		GO:0044267	-15.585	cellular protein metabolic process
GO:1901137	0.00051	carbohydrate derivative biosynthetic process		GO:0071669	-2.4789	plant-type cell wall organization or biogenesis
GO:0015979	0.00059	photosynthesis		GO:0009101	-2.8894	glycoprotein biosynthetic process
GO:0000154	0.00064	rRNA modification		GO:0009100	-2.8894	glycoprotein metabolic process
GO:0006487	0.0009	protein N-linked glycosylation		GO:0006468	-6.041	protein phosphorylation
GO:0001510	0.00101	RNA methylation		GO:0034645	-6.0506	cellular macromolecule biosynthetic process
GO:0009100	0.00129	glycoprotein metabolic process		GO:1901566	-18.4202	organonitrogen compound biosynthetic process
GO:0009101	0.00129	glycoprotein biosynthetic process		GO:0044271	-4.8861	cellular nitrogen compound biosynthetic process
GO:0034660	0.00147	ncRNA metabolic process		GO:0001510	-2.9957	RNA methylation
GO:0006730	0.00158	one-carbon metabolic process		GO:0044085	-3.6383	cellular component biogenesis
GO:0007154	0.00159	cell communication		GO:0016310	-7.3979	phosphorylation
GO:0016053	0.00173	organic acid biosynthetic process		GO:0000028	-2.2774	ribosomal small subunit assembly
GO:0046394	0.00173	carboxylic acid biosynthetic process		GO:0044249	-6.8539	cellular biosynthetic process
GO:0009628	0.00218	response to abiotic stimulus
GO:0031167	0.0026	rRNA methylation
GO:0006486	0.00274	protein glycosylation
GO:0043413	0.00274	macromolecule glycosylation
GO:0009664	0.0028	plant-type cell wall organization
GO:0072522	0.00295	purine-containing compound biosynthetic process
GO:0046653	0.00306	tetrahydrofolate metabolic process
GO:0071669	0.00332	plant-type cell wall organization or biogenesis
GO:1901135	0.00371	carbohydrate derivative metabolic process
GO:0001522	0.00398	pseudouridine synthesis
GO:0009870	0.00409	defense response signaling pathway, resistance gene-dependent
GO:0042255	0.00409	ribosome assembly
GO:0009411	0.00487	response to UV
GO:0044703	0.00519	multi-organism reproductive process
GO:0000028	0.00528	ribosomal small subunit assembly
GO:0071588	0.00528	hydrogen peroxide mediated signaling pathway
GO:0009644	0.00575	response to high light intensity
GO:0006457	0.00606	protein folding
GO:0009768	0.00649	photosynthesis, light harvesting in photosystem I
GO:0009260	0.00811	ribonucleotide biosynthetic process
GO:0046390	0.00811	ribose phosphate biosynthetic process
GO:0042742	0.00822	defense response to bacterium
GO:0009686	0.00857	gibberellin biosynthetic process
GO:0006164	0.00939	purine nucleotide biosynthetic process
GO:0009965	0.00952	leaf morphogenesis
GO:0009163	0.00963	nucleoside biosynthetic process
GO:0042455	0.00963	ribonucleoside biosynthetic process
GO:0043436	0.00982	oxoacid metabolic process
GO:0010193	0.00991	response to ozone

## Sheet: 18 profile dark GO
REG-MAP				REVIGO
GO.ID	p-value	Description		GO. ID	log10 p-value	Description
GO:0016310	4e-23	phosphorylation		GO:0002682	-3.699	regulation of immune system process
GO:0006796	2.7e-20	phosphate-containing compound metabolic process		GO:0006468	-16.8239	protein phosphorylation
GO:0006793	3.5e-20	phosphorus metabolic process		GO:0006952	-5.0362	defense response
GO:0006468	1.5e-17	protein phosphorylation		GO:0009987	-2.5591	cellular process
GO:0006464	1.1e-12	cellular protein modification process		GO:0008037	-3.2676	cell recognition
GO:0036211	1.1e-12	protein modification process		GO:0007005	-2.1675	mitochondrion organization
GO:0043412	4.3e-12	macromolecule modification		GO:0046348	-2.1373	amino sugar catabolic process
GO:0044267	4.2e-09	cellular protein metabolic process		GO:0007154	-2.6055	cell communication
GO:0019538	5.4e-08	protein metabolic process		GO:0043170	-2.684	macromolecule metabolic process
GO:0006952	9.2e-06	defense response		GO:0006793	-19.4559	phosphorus metabolic process
GO:0002682	0.0002	regulation of immune system process		GO:0048544	-3.2924	recognition of pollen
GO:0044260	0.00032	cellular macromolecule metabolic process		GO:0044237	-3.3565	cellular metabolic process
GO:0044237	0.00044	cellular metabolic process		GO:0010359	-2.0969	regulation of anion channel activity
GO:0048544	0.00051	recognition of pollen		GO:0043412	-11.3665	macromolecule modification
GO:0008037	0.00054	cell recognition		GO:0019538	-7.2676	protein metabolic process
GO:0009875	0.00063	pollen-pistil interaction		GO:0002831	-2.9586	regulation of response to biotic stimulus
GO:0045088	0.00075	regulation of innate immune response		GO:0044260	-3.4949	cellular macromolecule metabolic process
GO:0010112	0.00079	regulation of systemic acquired resistance		GO:0044267	-8.3768	cellular protein metabolic process
GO:0050776	0.00096	regulation of immune response		GO:0016310	-22.3979	phosphorylation
GO:0002831	0.0011	regulation of response to biotic stimulus		GO:0010112	-3.1024	regulation of systemic acquired resistance
GO:0032101	0.00195	regulation of response to external stimulus		GO:0032101	-2.71	regulation of response to external stimulus
GO:0043170	0.00207	macromolecule metabolic process		GO:0044706	-2.2441	multi-multicellular organism process
GO:0007154	0.00248	cell communication		GO:0043900	-2.1409	regulation of multi-organism process
GO:0009987	0.00276	cellular process		GO:0031347	-2.5575	regulation of defense response
GO:0031347	0.00277	regulation of defense response
GO:0009627	0.00564	systemic acquired resistance
GO:0009856	0.0057	pollination
GO:0044706	0.0057	multi-multicellular organism process
GO:0007005	0.0068	mitochondrion organization
GO:0043900	0.00723	regulation of multi-organism process
GO:0006030	0.00729	chitin metabolic process
GO:0006032	0.00729	chitin catabolic process
GO:0046348	0.00729	amino sugar catabolic process
GO:1901072	0.00729	glucosamine-containing compound catabolic process
GO:0010359	0.008	regulation of anion channel activity
GO:0006026	0.00823	aminoglycan catabolic process
GO:1901071	0.00923	glucosamine-containing compound metabolic process

## Sheet: Combined GO for 0-18 profiles
REG-MAP				REVIGO small list
GO.ID	p-value	Description		GO. ID	log10 p-value	Description
GO:1901564	1.8e-21	organonitrogen compound metabolic process		GO:1901564	-20.7447	organonitrogen compound metabolic process
GO:0015979	2.6e-21	photosynthesis		GO:0015979	-20.585	photosynthesis
GO:1901566	1.4e-19	organonitrogen compound biosynthetic process		GO:1901566	-18.8539	organonitrogen compound biosynthetic process
GO:0009987	3.1e-18	cellular process		GO:0009987	-17.5086	cellular process
GO:0043603	1.1e-15	cellular amide metabolic process		GO:0043603	-14.9586	cellular amide metabolic process
GO:0006518	2.3e-15	peptide metabolic process		GO:0009058	-14.4318	biosynthetic process
GO:0044711	3.7e-15	single-organism biosynthetic process		GO:0006412	-14	translation
GO:0043043	5.5e-15	peptide biosynthetic process		GO:0009628	-13.1079	response to abiotic stimulus
GO:0006412	1e-14	translation		GO:0044237	-12.7959	cellular metabolic process
GO:0043604	3.9e-14	amide biosynthetic process		GO:0009416	-12.1487	response to light stimulus
GO:0009628	7.8e-14	response to abiotic stimulus		GO:0006091	-11.2518	generation of precursor metabolites and energy
GO:0044237	1.6e-13	cellular metabolic process		GO:0006793	-11.1805	phosphorus metabolic process
GO:0009416	7.1e-13	response to light stimulus		GO:0019684	-11.1135	photosynthesis, light reaction
GO:0044267	2.4e-12	cellular protein metabolic process		GO:0044281	-10.3872	small molecule metabolic process
GO:0016310	2.6e-12	phosphorylation		GO:0006468	-10.1079	protein phosphorylation
GO:0009314	3.5e-12	response to radiation		GO:0005975	-9.4089	carbohydrate metabolic process
GO:0006091	5.6e-12	generation of precursor metabolites and energy		GO:0044264	-9.3468	cellular polysaccharide metabolic process
GO:0006796	6.6e-12	phosphate-containing compound metabolic process		GO:0043412	-8.8539	macromolecule modification
GO:0006793	6.6e-12	phosphorus metabolic process		GO:0042254	-8.5686	ribosome biogenesis
GO:0019684	7.7e-12	photosynthesis, light reaction		GO:0008152	-7.8861	metabolic process
GO:0044281	4.1e-11	small molecule metabolic process		GO:0009735	-6.9586	response to cytokinin
GO:0006468	7.8e-11	protein phosphorylation		GO:0019538	-6.8861	protein metabolic process
GO:0044723	3.9e-10	single-organism carbohydrate metabolic process		GO:0009451	-6.7212	RNA modification
GO:0044264	4.5e-10	cellular polysaccharide metabolic process		GO:0048544	-6.4559	recognition of pollen
GO:0043412	1.4e-09	macromolecule modification		GO:0008037	-6.3372	cell recognition
GO:0009765	2.7e-09	photosynthesis, light harvesting		GO:0051186	-6.1427	(obsolete) cofactor metabolic process
GO:0042254	2.7e-09	ribosome biogenesis		GO:0010109	-6.0655	regulation of photosynthesis
GO:0006073	2.7e-09	cellular glucan metabolic process		GO:0016556	-6.0655	mRNA modification
GO:0044042	2.7e-09	glucan metabolic process		GO:0046394	-5.9586	carboxylic acid biosynthetic process
GO:0044283	3.8e-09	small molecule biosynthetic process		GO:0051707	-5.8861	response to other organism
GO:0016051	4.5e-09	carbohydrate biosynthetic process		GO:0071704	-5.8239	organic substance metabolic process
GO:0080167	9.2e-09	response to karrikin		GO:0009607	-5.7959	response to biotic stimulus
GO:0008152	1.3e-08	metabolic process		GO:1900864	-5.7447	mitochondrial RNA modification
GO:0033692	1.5e-08	cellular polysaccharide biosynthetic process		GO:0009605	-5.4318	response to external stimulus
GO:0000271	2e-08	polysaccharide biosynthetic process		GO:0042221	-5.4089	response to chemical
GO:0005982	2.3e-08	starch metabolic process		GO:0009657	-5.3872	plastid organization
GO:0043436	2.6e-08	oxoacid metabolic process		GO:0006112	-5.3768	energy reserve metabolic process
GO:0006082	3.2e-08	organic acid metabolic process		GO:0071669	-5.301	plant-type cell wall organization or biogenesis
GO:0009058	3.5e-08	biosynthetic process		GO:0000959	-5.2291	mitochondrial RNA metabolic process
GO:0022613	3.7e-08	ribonucleoprotein complex biogenesis		GO:0072524	-4.9586	pyridine-containing compound metabolic process
GO:0019752	5.7e-08	carboxylic acid metabolic process		GO:0018298	-4.9208	protein-chromophore linkage
GO:0009250	6e-08	glucan biosynthetic process		GO:0009071	-4.8239	serine family amino acid catabolic process
GO:0034637	6.9e-08	cellular carbohydrate biosynthetic process		GO:0050896	-4.5686	response to stimulus
GO:0009735	1.1e-07	response to cytokinin		GO:0042548	-4.5528	regulation of photosynthesis, light reaction
GO:0019538	1.3e-07	protein metabolic process		GO:0006732	-4.3188	(obsolete) coenzyme metabolic process
GO:1901576	1.3e-07	organic substance biosynthetic process		GO:0007154	-4.2291	cell communication
GO:0009451	1.9e-07	RNA modification		GO:0043467	-4.2007	regulation of generation of precursor metabolites and energy
GO:0044262	2.3e-07	cellular carbohydrate metabolic process		GO:0046496	-4.1675	nicotinamide nucleotide metabolic process
GO:0044763	2.6e-07	single-organism cellular process		GO:0030091	-4.0362	protein repair
GO:0048544	3.5e-07	recognition of pollen		GO:0098656	-3.6576	anion transmembrane transport
GO:0009409	3.6e-07	response to cold		GO:0072528	-3.6198	pyrimidine-containing compound biosynthetic process
GO:0008037	4.6e-07	cell recognition		GO:0072348	-3.5686	sulfur compound transport
GO:0044249	5.1e-07	cellular biosynthetic process		GO:0010025	-3.5229	wax biosynthetic process
GO:0051186	7.2e-07	cofactor metabolic process		GO:0051188	-3.4815	(obsolete) cofactor biosynthetic process
GO:0010109	8.6e-07	regulation of photosynthesis		GO:0009658	-3.4559	chloroplast organization
GO:0016556	8.6e-07	mRNA modification		GO:0006733	-3.3979	(obsolete) oxidoreduction coenzyme metabolic process
GO:0080156	9e-07	mitochondrial mRNA modification		GO:0009698	-3.3979	phenylpropanoid metabolic process
GO:0009875	1e-06	pollen-pistil interaction		GO:0006457	-3.3565	protein folding
GO:0016053	1.1e-06	organic acid biosynthetic process		GO:0044238	-3.3468	primary metabolic process
GO:0046394	1.1e-06	carboxylic acid biosynthetic process		GO:1901615	-3.1675	organic hydroxy compound metabolic process
GO:0006464	1.3e-06	cellular protein modification process		GO:1901135	-3.0757	carbohydrate derivative metabolic process
GO:0036211	1.3e-06	protein modification process		GO:0043094	-3.0362	cellular metabolic compound salvage
GO:0043207	1.3e-06	response to external biotic stimulus		GO:0010035	-2.9666	response to inorganic substance
GO:0051707	1.3e-06	response to other organism		GO:0046112	-2.9281	nucleobase biosynthetic process
GO:0071704	1.5e-06	organic substance metabolic process		GO:0071554	-2.8962	cell wall organization or biogenesis
GO:0009607	1.6e-06	response to biotic stimulus		GO:0010608	-2.8729	posttranscriptional regulation of gene expression
GO:1900864	1.8e-06	mitochondrial RNA modification		GO:0046148	-2.857	pigment biosynthetic process
GO:0009266	2.4e-06	response to temperature stimulus		GO:0072527	-2.8416	pyrimidine-containing compound metabolic process
GO:0005975	2.5e-06	carbohydrate metabolic process		GO:0019748	-2.821	secondary metabolic process
GO:0044085	2.7e-06	cellular component biogenesis		GO:0042440	-2.821	pigment metabolic process
GO:0009605	3.7e-06	response to external stimulus		GO:0006857	-2.7747	oligopeptide transport
GO:0042221	3.9e-06	response to chemical		GO:0006952	-2.767	defense response
GO:0009657	4.1e-06	plastid organization		GO:0010135	-2.757	ureide metabolic process
GO:0005977	4.2e-06	glycogen metabolic process		GO:0043605	-2.757	cellular amide catabolic process
GO:0006112	4.2e-06	energy reserve metabolic process		GO:0010136	-2.757	ureide catabolic process
GO:0071669	5e-06	plant-type cell wall organization or biogenesis		GO:0042873	-2.7496	aldonate transmembrane transport
GO:0000959	5.9e-06	mitochondrial RNA metabolic process		GO:0009553	-2.7328	embryo sac development
GO:0006820	7.2e-06	anion transport		GO:0002252	-2.7258	immune effector process
GO:0042742	7.3e-06	defense response to bacterium		GO:0006730	-2.7258	one-carbon metabolic process
GO:0072524	1.1e-05	pyridine-containing compound metabolic process		GO:0008610	-2.699	lipid biosynthetic process
GO:0010114	1.1e-05	response to red light		GO:0045454	-2.6402	cell redox homeostasis
GO:0009617	1.1e-05	response to bacterium		GO:0006066	-2.52	alcohol metabolic process
GO:0018298	1.2e-05	protein-chromophore linkage		GO:0009853	-2.5114	photorespiration
GO:0009071	1.5e-05	serine family amino acid catabolic process		GO:0007623	-2.5086	circadian rhythm
GO:0005976	1.7e-05	polysaccharide metabolic process		GO:0048511	-2.5086	rhythmic process
GO:0009637	1.9e-05	response to blue light		GO:0000413	-2.399	protein peptidyl-prolyl isomerization
GO:0019252	1.9e-05	starch biosynthetic process		GO:0031425	-2.3507	chloroplast RNA processing
GO:0009773	2e-05	photosynthetic electron transport in photosystem I		GO:0044260	-2.3125	cellular macromolecule metabolic process
GO:0050896	2.7e-05	response to stimulus		GO:0042372	-2.2857	phylloquinone biosynthetic process
GO:0042548	2.8e-05	regulation of photosynthesis, light reaction		GO:0006629	-2.2782	lipid metabolic process
GO:0044724	3.7e-05	single-organism carbohydrate catabolic process		GO:0006779	-2.27	porphyrin-containing compound biosynthetic process
GO:0032787	4.5e-05	monocarboxylic acid metabolic process		GO:0032412	-2.1457	regulation of ion transmembrane transporter activity
GO:0006732	4.8e-05	coenzyme metabolic process		GO:0032409	-2.1457	regulation of transporter activity
GO:0098542	5.3e-05	defense response to other organism		GO:0015717	-2.1355	triose phosphate transport
GO:0007154	5.9e-05	cell communication		GO:0070272	-2.0675	(obsolete) proton-transporting ATP synthase complex biogenesis
GO:0043467	6.3e-05	regulation of generation of precursor metabolites and energy		GO:0042753	-2.0675	positive regulation of circadian rhythm
GO:0006165	6.4e-05	nucleoside diphosphate phosphorylation		GO:0010731	-2.0675	protein glutathionylation
GO:0046496	6.8e-05	nicotinamide nucleotide metabolic process		GO:0010258	-2.0675	NADH dehydrogenase complex (plastoquinone) assembly
GO:0010218	6.9e-05	response to far red light		GO:0031116	-2.0675	positive regulation of microtubule polymerization
GO:0009768	7.3e-05	photosynthesis, light harvesting in photosystem I		GO:0090377	-2.0675	seed trichome initiation
GO:0005983	7.5e-05	starch catabolic process		GO:1901657	-2.0531	glycosyl compound metabolic process
GO:0010207	8.2e-05	photosystem II assembly		GO:0044272	-2.0218	sulfur compound biosynthetic process
GO:0019362	8.7e-05	pyridine nucleotide metabolic process		GO:0055114	-2.0177	(obsolete) oxidation-reduction process
GO:0005978	9.2e-05	glycogen biosynthetic process
GO:0030091	9.2e-05	protein repair
GO:0010206	9.8e-05	photosystem II repair
GO:0006364	0.00015	rRNA processing
GO:0006096	0.00015	glycolytic process
GO:0006757	0.00015	ATP generation from ADP
GO:0046031	0.00015	ADP metabolic process
GO:0009639	0.00017	response to red or far red light
GO:0009767	0.00019	photosynthetic electron transport chain
GO:0016072	0.0002	rRNA metabolic process
GO:0046939	0.0002	nucleotide phosphorylation
GO:0043623	0.0002	cellular protein complex assembly
GO:0098656	0.00022	anion transmembrane transport
GO:0009664	0.00024	plant-type cell wall organization
GO:0009834	0.00024	plant-type secondary cell wall biogenesis
GO:0072528	0.00024	pyrimidine-containing compound biosynthetic process
GO:0009743	0.00025	response to carbohydrate
GO:0072348	0.00027	sulfur compound transport
GO:0009135	0.00028	purine nucleoside diphosphate metabolic process
GO:0009179	0.00028	purine ribonucleoside diphosphate metabolic process
GO:0009185	0.00028	ribonucleoside diphosphate metabolic process
GO:0010025	0.0003	wax biosynthetic process
GO:0006520	0.00033	cellular amino acid metabolic process
GO:0009411	0.00033	response to UV
GO:0051188	0.00033	cofactor biosynthetic process
GO:0009658	0.00035	chloroplast organization
GO:0006546	0.00036	glycine catabolic process
GO:0015698	0.00036	inorganic anion transport
GO:0034285	0.00037	response to disaccharide
GO:0009698	0.0004	phenylpropanoid metabolic process
GO:0006733	0.0004	oxidoreduction coenzyme metabolic process
GO:0009228	0.00042	thiamine biosynthetic process
GO:0042724	0.00042	thiamine-containing compound biosynthetic process
GO:0009132	0.00043	nucleoside diphosphate metabolic process
GO:0006457	0.00044	protein folding
GO:0044238	0.00045	primary metabolic process
GO:0006544	0.00045	glycine metabolic process
GO:0009082	0.00045	branched-chain amino acid biosynthetic process
GO:0030244	0.00047	cellulose biosynthetic process
GO:0006090	0.00055	pyruvate metabolic process
GO:0046686	0.00056	response to cadmium ion
GO:0010166	0.00059	wax metabolic process
GO:0009642	0.00062	response to light intensity
GO:1901615	0.00068	organic hydroxy compound metabolic process
GO:0009112	0.00072	nucleobase metabolic process
GO:0009644	0.00072	response to high light intensity
GO:0071482	0.00073	cellular response to light stimulus
GO:0010038	0.00079	response to metal ion
GO:0009744	0.00082	response to sucrose
GO:1901135	0.00084	carbohydrate derivative metabolic process
GO:0043094	0.00092	cellular metabolic compound salvage
GO:0055086	0.001	nucleobase-containing small molecule metabolic process
GO:0071214	0.00102	cellular response to abiotic stimulus
GO:0010035	0.00108	response to inorganic substance
GO:0010033	0.00109	response to organic substance
GO:0008272	0.00109	sulfate transport
GO:0009832	0.00113	plant-type cell wall biogenesis
GO:0046112	0.00118	nucleobase biosynthetic process
GO:0044036	0.00118	cell wall macromolecule metabolic process
GO:1901605	0.00125	alpha-amino acid metabolic process
GO:0071554	0.00127	cell wall organization or biogenesis
GO:0009069	0.00128	serine family amino acid metabolic process
GO:0010608	0.00134	posttranscriptional regulation of gene expression
GO:0046148	0.00139	pigment biosynthetic process
GO:0044710	0.0014	single-organism metabolic process
GO:0072527	0.00144	pyrimidine-containing compound metabolic process
GO:1902358	0.00145	sulfate transmembrane transport
GO:0042546	0.00149	cell wall biogenesis
GO:0019748	0.00151	secondary metabolic process
GO:0042440	0.00151	pigment metabolic process
GO:0006857	0.00168	oligopeptide transport
GO:0015833	0.00168	peptide transport
GO:0006952	0.00171	defense response
GO:0010135	0.00175	ureide metabolic process
GO:0010136	0.00175	ureide catabolic process
GO:0043605	0.00175	cellular amide catabolic process
GO:0044205	0.00175	'de novo' UMP biosynthetic process
GO:0030243	0.00176	cellulose metabolic process
GO:0042549	0.00178	photosystem II stabilization
GO:0042873	0.00178	aldonate transport
GO:0072330	0.0018	monocarboxylic acid biosynthetic process
GO:0009553	0.00185	embryo sac development
GO:0002252	0.00188	immune effector process
GO:0006730	0.00188	one-carbon metabolic process
GO:0071478	0.0019	cellular response to radiation
GO:0034470	0.00196	ncRNA processing
GO:0008610	0.002	lipid biosynthetic process
GO:0006207	0.00225	'de novo' pyrimidine nucleobase biosynthetic process
GO:0045454	0.00229	cell redox homeostasis
GO:0019856	0.00278	pyrimidine nucleobase biosynthetic process
GO:0022414	0.0029	reproductive process
GO:0006066	0.00302	alcohol metabolic process
GO:0006633	0.00303	fatty acid biosynthetic process
GO:0009853	0.00308	photorespiration
GO:0046364	0.00308	monosaccharide biosynthetic process
GO:0007623	0.0031	circadian rhythm
GO:0048511	0.0031	rhythmic process
GO:0009624	0.00325	response to nematode
GO:0051274	0.00341	beta-glucan biosynthetic process
GO:0009116	0.00344	nucleoside metabolic process
GO:0006772	0.00346	thiamine metabolic process
GO:0042723	0.00346	thiamine-containing compound metabolic process
GO:0010383	0.00351	cell wall polysaccharide metabolic process
GO:0006778	0.00361	porphyrin-containing compound metabolic process
GO:0005996	0.00371	monosaccharide metabolic process
GO:0044275	0.00374	cellular carbohydrate catabolic process
GO:0000413	0.00399	protein peptidyl-prolyl isomerization
GO:0031425	0.00446	chloroplast RNA processing
GO:0055088	0.00446	lipid homeostasis
GO:1901698	0.00462	response to nitrogen compound
GO:0044260	0.00487	cellular macromolecule metabolic process
GO:0006549	0.00518	isoleucine metabolic process
GO:0009097	0.00518	isoleucine biosynthetic process
GO:0010196	0.00518	nonphotochemical quenching
GO:0019852	0.00518	L-ascorbic acid metabolic process
GO:0019853	0.00518	L-ascorbic acid biosynthetic process
GO:0042372	0.00518	phylloquinone biosynthetic process
GO:0042374	0.00518	phylloquinone metabolic process
GO:1990066	0.00518	energy quenching
GO:0006629	0.00527	lipid metabolic process
GO:0006779	0.00537	porphyrin-containing compound biosynthetic process
GO:0009808	0.00537	lignin metabolic process
GO:1903825	0.00565	organic acid transmembrane transport
GO:0018208	0.00627	peptidyl-proline modification
GO:0043648	0.00627	dicarboxylic acid metabolic process
GO:0009251	0.00645	glucan catabolic process
GO:0044247	0.00645	cellular polysaccharide catabolic process
GO:0051273	0.00703	beta-glucan metabolic process
GO:0007020	0.00715	microtubule nucleation
GO:0010205	0.00715	photoinhibition
GO:0022898	0.00715	regulation of transmembrane transporter activity
GO:0032409	0.00715	regulation of transporter activity
GO:0032412	0.00715	regulation of ion transmembrane transporter activity
GO:0043155	0.00715	negative regulation of photosynthesis, light reaction
GO:0009856	0.00723	pollination
GO:0044706	0.00723	multi-multicellular organism process
GO:0009699	0.0073	phenylpropanoid biosynthetic process
GO:0006145	0.00732	purine nucleobase catabolic process
GO:0006556	0.00732	S-adenosylmethionine biosynthetic process
GO:0015713	0.00732	phosphoglycerate transport
GO:0015717	0.00732	triose phosphate transport
GO:0042816	0.00732	vitamin B6 metabolic process
GO:0042819	0.00732	vitamin B6 biosynthetic process
GO:0072525	0.00775	pyridine-containing compound biosynthetic process
GO:0044703	0.00785	multi-organism reproductive process
GO:0042364	0.00839	water-soluble vitamin biosynthetic process
GO:0000256	0.00856	allantoin catabolic process
GO:0010258	0.00856	NADH dehydrogenase complex (plastoquinone) assembly
GO:0010731	0.00856	protein glutathionylation
GO:0015714	0.00856	phosphoenolpyruvate transport
GO:0019464	0.00856	glycine decarboxylation via glycine cleavage system
GO:0031116	0.00856	positive regulation of microtubule polymerization
GO:0042753	0.00856	positive regulation of circadian rhythm
GO:0070272	0.00856	proton-transporting ATP synthase complex biogenesis
GO:0090377	0.00856	seed trichome initiation
GO:1901657	0.00885	glycosyl compound metabolic process
GO:0010410	0.00901	hemicellulose metabolic process
GO:0044550	0.00901	secondary metabolite biosynthetic process
GO:0010043	0.00938	response to zinc ion
GO:0044272	0.00951	sulfur compound biosynthetic process
GO:0055114	0.0096	oxidation-reduction process
GO:0042886	0.00973	amide transport
GO:0009110	0.00994	vitamin biosynthetic process
GO:0015994	0.00994	chlorophyll metabolic process

## Sheet: 23 profile dark GO
REG-MAP				REVIGO small list
GO.ID	p-value	Description		GO. ID	log10 p-value	Description
GO:0055065	1.4e-06	metal ion homeostasis		GO:0007623	-3.0915	circadian rhythm
GO:0050801	2.7e-06	ion homeostasis		GO:0010228	-2.2933	vegetative to reproductive phase transition of meristem
GO:2000030	3.5e-06	regulation of response to red or far red light		GO:0034220	-2.7721	ion transmembrane transport
GO:0055080	4.9e-06	cation homeostasis		GO:0048511	-3.0915	rhythmic process
GO:0098771	9.8e-06	inorganic ion homeostasis		GO:0050801	-5.5686	ion homeostasis
GO:0048878	3.8e-05	chemical homeostasis		GO:0051179	-3.7696	localization
GO:0006879	8.8e-05	cellular iron ion homeostasis		GO:0065007	-2.0137	biological regulation
GO:0051234	0.0001	establishment of localization		GO:0072350	-2.2596	tricarboxylic acid metabolic process
GO:0055085	0.00011	transmembrane transport		GO:2000030	-5.4559	regulation of response to red or far red light
GO:0044765	0.00013	single-organism transport		GO:0010119	-2.0595	regulation of stomatal movement
GO:0051179	0.00017	localization		GO:0009902	-2.3575	chloroplast relocation
GO:1902578	0.00018	single-organism localization		GO:0048583	-3.4437	regulation of response to stimulus
GO:0006875	0.00018	cellular metal ion homeostasis		GO:0009723	-2.6904	response to ethylene
GO:0055076	0.00023	transition metal ion homeostasis		GO:0001558	-2.1986	regulation of cell growth
GO:0030003	0.00026	cellular cation homeostasis		GO:0009628	-2.9393	response to abiotic stimulus
GO:0055075	0.00032	potassium ion homeostasis		GO:1901700	-2.6696	response to oxygen-containing compound
GO:0048583	0.00036	regulation of response to stimulus		GO:0070370	-2.6421	cellular heat acclimation
GO:0046916	0.00039	cellular transition metal ion homeostasis		GO:0071241	-2.466	cellular response to inorganic substance
GO:0006810	0.0004	transport		GO:0050793	-2.0555	regulation of developmental process
GO:0006873	0.00044	cellular ion homeostasis		GO:0051234	-4	establishment of localization
GO:0009416	0.00052	response to light stimulus		GO:0051644	-2.3575	plastid localization
GO:0010099	0.00057	regulation of photomorphogenesis		GO:0006811	-2.3556	ion transport
GO:0055072	0.00067	iron ion homeostasis		GO:0044765	-3.8861	single-organism transport
GO:0009314	0.00071	response to radiation		GO:0071369	-2.3575	cellular response to ethylene stimulus
GO:0007623	0.00081	circadian rhythm		GO:1902578	-3.7447	single-organism localization
GO:0048511	0.00081	rhythmic process		GO:0071732	-2.4413	cellular response to nitric oxide
GO:0009628	0.00115	response to abiotic stimulus		GO:0071731	-2.3575	response to nitric oxide
GO:0055082	0.00154	cellular chemical homeostasis		GO:1902170	-2.2111	cellular response to reactive nitrogen species
GO:0034220	0.00169	ion transmembrane transport		GO:0006813	-2.4698	potassium ion transport
GO:0009408	0.0017	response to heat		GO:0055085	-3.9586	transmembrane transport
GO:0009723	0.00204	response to ethylene		GO:1901701	-2.4123	cellular response to oxygen-containing compound
GO:1901700	0.00214	response to oxygen-containing compound
GO:0070370	0.00228	cellular heat acclimation
GO:0048573	0.00256	photoperiodism, flowering
GO:0055067	0.0026	monovalent inorganic cation homeostasis
GO:0006813	0.00339	potassium ion transport
GO:0071241	0.00342	cellular response to inorganic substance
GO:0071732	0.00362	cellular response to nitric oxide
GO:1901701	0.00387	cellular response to oxygen-containing compound
GO:0071369	0.00439	cellular response to ethylene stimulus
GO:0009902	0.00439	chloroplast relocation
GO:0019750	0.00439	chloroplast localization
GO:0051644	0.00439	plastid localization
GO:0051667	0.00439	establishment of plastid localization
GO:0071731	0.00439	response to nitric oxide
GO:0009648	0.0044	photoperiodism
GO:0006811	0.00441	ion transport
GO:0009639	0.00458	response to red or far red light
GO:0010228	0.00509	vegetative to reproductive phase transition of meristem
GO:0009266	0.00525	response to temperature stimulus
GO:0034599	0.0055	cellular response to oxidative stress
GO:0072350	0.0055	tricarboxylic acid metabolic process
GO:0030001	0.00554	metal ion transport
GO:1902170	0.00615	cellular response to reactive nitrogen species
GO:0001558	0.00633	regulation of cell growth
GO:0097305	0.00662	response to alcohol
GO:0051656	0.00714	establishment of organelle localization
GO:0010119	0.00872	regulation of stomatal movement
GO:0050793	0.0088	regulation of developmental process
GO:0065007	0.00969	biological regulation
GO:0009637	0.00981	response to blue light

## Sheet: 35 profile dark GO
REG-MAP				REVIGO small list
GO.ID	p-value	Description		GO. ID	log10 p-value	Description
GO:1901700	6.7e-10	response to oxygen-containing compound		GO:0007568	-5.9586	aging
GO:0001101	5.2e-09	response to acid chemical		GO:0044699	-4.4318	single-organism process
GO:0009628	8e-09	response to abiotic stimulus		GO:0046700	-7.1612	heterocycle catabolic process
GO:0009737	1e-08	response to abscisic acid		GO:0050896	-5.2218	response to stimulus
GO:0097305	1.3e-08	response to alcohol		GO:0051179	-4.4437	localization
GO:0046700	6.9e-08	heterocycle catabolic process		GO:1901700	-9.1739	response to oxygen-containing compound
GO:0044270	8.5e-08	cellular nitrogen compound catabolic process		GO:0009056	-2.1409	catabolic process
GO:0006914	9.2e-08	autophagy		GO:0016236	-2.9355	macroautophagy
GO:1901361	1.1e-07	organic cyclic compound catabolic process		GO:0007033	-4	vacuole organization
GO:0042221	1.2e-07	response to chemical		GO:0006914	-7.0362	autophagy
GO:0033993	1.3e-07	response to lipid		GO:0044764	-2.4976	multi-organism cellular process
GO:0019439	6.6e-07	aromatic compound catabolic process		GO:0048522	-3.7959	positive regulation of cellular process
GO:0009605	7.4e-07	response to external stimulus		GO:0006595	-5.2076	polyamine metabolic process
GO:0044710	1.1e-06	single-organism metabolic process		GO:0070647	-2.6799	protein modification by small protein conjugation or removal
GO:0007568	1.1e-06	aging		GO:0006790	-2.308	sulfur compound metabolic process
GO:1901565	4.8e-06	organonitrogen compound catabolic process		GO:0006629	-4.301	lipid metabolic process
GO:0010150	5.9e-06	leaf senescence		GO:0097164	-2.4089	ammonium ion metabolic process
GO:0010260	5.9e-06	organ senescence		GO:0046149	-3.5686	pigment catabolic process
GO:0050896	6e-06	response to stimulus		GO:0016138	-3.5086	glycoside biosynthetic process
GO:0006595	6.2e-06	polyamine metabolic process		GO:0019395	-2.8827	fatty acid oxidation
GO:0006597	6.5e-06	spermine biosynthetic process		GO:0019748	-2.6676	secondary metabolic process
GO:0008215	6.5e-06	spermine metabolic process		GO:0042440	-2.6676	pigment metabolic process
GO:0009719	6.7e-06	response to endogenous stimulus		GO:0044710	-5.9586	single-organism metabolic process
GO:0006970	7.2e-06	response to osmotic stress		GO:0034754	-2.6364	cellular hormone metabolic process
GO:0031667	8.2e-06	response to nutrient levels		GO:0009308	-4.2076	amine metabolic process
GO:0009725	1.4e-05	response to hormone		GO:0010424	-2.3429	DNA methylation on cytosine within a CG sequence
GO:0009991	2.2e-05	response to extracellular stimulus		GO:0044550	-2.7471	secondary metabolite biosynthetic process
GO:0010033	2.3e-05	response to organic substance		GO:0043269	-2.4067	regulation of ion transport
GO:0008216	3.2e-05	spermidine metabolic process		GO:0006970	-5.1427	response to osmotic stress
GO:0008295	3.2e-05	spermidine biosynthetic process		GO:0055114	-2.9788	oxidation-reduction process
GO:0044763	3.2e-05	single-organism cellular process		GO:0009660	-2.9355	amyloplast organization
GO:0051179	3.6e-05	localization		GO:0048518	-2.1385	positive regulation of biological process
GO:0044699	3.7e-05	single-organism process		GO:0010260	-5.2291	animal organ senescence
GO:0098542	4.1e-05	defense response to other organism		GO:0006310	-2.0376	DNA recombination
GO:0009753	4.3e-05	response to jasmonic acid		GO:0044763	-4.4949	single-organism cellular process
GO:0006629	5e-05	lipid metabolic process		GO:0009607	-3.8861	response to biotic stimulus
GO:0043207	5.8e-05	response to external biotic stimulus		GO:0052646	-2.7055	alditol phosphate metabolic process
GO:0051707	5.8e-05	response to other organism		GO:0032973	-2.3429	amino acid export
GO:0009308	6.2e-05	amine metabolic process		GO:0009991	-4.6576	response to extracellular stimulus
GO:0042594	6.2e-05	response to starvation		GO:0009628	-8.0969	response to abiotic stimulus
GO:0006596	6.6e-05	polyamine biosynthetic process		GO:0009719	-5.1739	response to endogenous stimulus
GO:0006787	6.6e-05	porphyrin-containing compound catabolic process		GO:0016143	-2.3354	S-glycoside metabolic process
GO:0033015	6.6e-05	tetrapyrrole catabolic process		GO:0006810	-4.0458	transport
GO:0051234	7.1e-05	establishment of localization		GO:0019375	-2.0605	galactolipid biosynthetic process
GO:0044242	7.7e-05	cellular lipid catabolic process		GO:1902000	-2.3429	homogentisate catabolic process
GO:0031669	8.6e-05	cellular response to nutrient levels		GO:0010264	-2.0605	myo-inositol hexakisphosphate biosynthetic process
GO:0044248	8.6e-05	cellular catabolic process		GO:0032787	-2.3089	monocarboxylic acid metabolic process
GO:0006810	9e-05	transport		GO:0016137	-2.9355	glycoside metabolic process
GO:0009266	0.0001	response to temperature stimulus		GO:0042221	-6.9208	response to chemical
GO:0007033	0.0001	vacuole organization		GO:0009611	-2.5867	response to wounding
GO:0051187	0.0001	cofactor catabolic process		GO:1902074	-2.2807	response to salt
GO:0009415	0.00011	response to water		GO:0051128	-2.055	regulation of cellular component organization
GO:0071229	0.00013	cellular response to acid chemical		GO:0010045	-2.3429	response to nickel cation
GO:0009607	0.00013	response to biotic stimulus		GO:0006572	-2.3429	tyrosine catabolic process
GO:0048522	0.00016	positive regulation of cellular process		GO:0048583	-2.0057	regulation of response to stimulus
GO:0009414	0.00017	response to water deprivation		GO:0016567	-2.4225	protein ubiquitination
GO:0031668	0.00019	cellular response to extracellular stimulus		GO:0009605	-6.1308	response to external stimulus
GO:0015996	0.00027	chlorophyll catabolic process		GO:0016226	-2.1746	iron-sulfur cluster assembly
GO:0046149	0.00027	pigment catabolic process		GO:0098771	-2.1062	inorganic ion homeostasis
GO:0071496	0.00027	cellular response to external stimulus		GO:0006787	-4.1805	porphyrin-containing compound catabolic process
GO:0009651	0.00028	response to salt stress		GO:0006082	-2.0057	organic acid metabolic process
GO:0016138	0.00031	glycoside biosynthetic process		GO:0033043	-2.27	regulation of organelle organization
GO:0072329	0.00031	monocarboxylic acid catabolic process		GO:0071289	-2.3429	cellular response to nickel ion
GO:0006855	0.00032	drug transmembrane transport		GO:0097305	-7.8861	response to alcohol
GO:0009408	0.00033	response to heat		GO:0009959	-2.0605	negative gravitropism
GO:0015893	0.00037	drug transport		GO:0051187	-4	cofactor catabolic process
GO:0044106	0.00037	cellular amine metabolic process		GO:1901999	-2.3429	homogentisate metabolic process
GO:0070887	0.00042	cellular response to chemical stimulus		GO:0045836	-2.3429	positive regulation of meiotic nuclear division
GO:0042493	0.00043	response to drug		GO:0006950	-3.3372	response to stress
GO:0044255	0.00044	cellular lipid metabolic process		GO:0001101	-8.284	response to acid chemical
GO:0006950	0.00046	response to stress		GO:0050826	-2.6308	response to freezing
GO:0006576	0.00046	cellular biogenic amine metabolic process		GO:0033015	-4.1805	tetrapyrrole catabolic process
GO:0034655	0.00057	nucleobase-containing compound catabolic process		GO:1901136	-2.2676	carbohydrate derivative catabolic process
GO:0009309	0.00062	amine biosynthetic process		GO:0010150	-5.2291	leaf senescence
GO:0042401	0.00062	cellular biogenic amine biosynthetic process		GO:0006855	-3.4949	drug transmembrane transport
GO:0051130	0.00082	positive regulation of cellular component organization		GO:0031163	-2.1746	metallo-sulfur cluster assembly
GO:1902578	0.00087	single-organism localization		GO:0000079	-2.3354	regulation of cyclin-dependent protein serine/threonine kinase activity
GO:0055085	0.00101	transmembrane transport		GO:0010200	-2.5229	response to chitin
GO:0009062	0.00102	fatty acid catabolic process		GO:0042493	-3.3665	response to drug
GO:0055114	0.00105	oxidation-reduction process		GO:1902578	-3.0605	single-organism localization
GO:0051781	0.00115	positive regulation of cell division		GO:0044242	-4.1135	cellular lipid catabolic process
GO:0000045	0.00116	autophagosome assembly		GO:0010035	-2.767	response to inorganic substance
GO:0009660	0.00116	amyloplast organization		GO:0044765	-2.8268	single-organism transport
GO:0016137	0.00116	glycoside metabolic process		GO:0051781	-2.9393	positive regulation of cell division
GO:0016236	0.00116	macroautophagy		GO:0072329	-3.5086	monocarboxylic acid catabolic process
GO:0019395	0.00131	fatty acid oxidation		GO:0009648	-2.5287	photoperiodism
GO:0044765	0.00149	single-organism transport		GO:1901361	-6.9586	organic cyclic compound catabolic process
GO:0016054	0.00159	organic acid catabolic process		GO:0071241	-2.2487	cellular response to inorganic substance
GO:0046395	0.00159	carboxylic acid catabolic process		GO:0001676	-2.0605	long-chain fatty acid metabolic process
GO:1901701	0.00161	cellular response to oxygen-containing compound		GO:1905269	-2.7055	positive regulation of chromatin organization
GO:0010035	0.00171	response to inorganic substance		GO:1902275	-2.0942	regulation of chromatin organization
GO:0044550	0.00179	secondary metabolite biosynthetic process		GO:0044255	-3.3565	cellular lipid metabolic process
GO:0009620	0.00195	response to fungus		GO:0033517	-2.0605	myo-inositol hexakisphosphate metabolic process
GO:0031325	0.00195	positive regulation of cellular metabolic process		GO:1901565	-5.3188	organonitrogen compound catabolic process
GO:0016144	0.00197	S-glycoside biosynthetic process		GO:0009737	-8	response to abscisic acid
GO:0019758	0.00197	glycosinolate biosynthetic process		GO:0010033	-4.6383	response to organic substance
GO:0019761	0.00197	glucosinolate biosynthetic process		GO:2001252	-2.5086	positive regulation of chromosome organization
GO:0052646	0.00197	alditol phosphate metabolic process		GO:0055085	-2.9957	transmembrane transport
GO:1903310	0.00197	positive regulation of chromatin modification		GO:0033993	-6.8861	response to lipid
GO:0044712	0.00205	single-organism catabolic process		GO:0006597	-5.1871	spermine biosynthetic process
GO:0070647	0.00209	protein modification by small protein conjugation or removal		GO:0009651	-3.5528	response to salt stress
GO:0019748	0.00215	secondary metabolic process		GO:0048573	-2.0915	photoperiodism, flowering
GO:0042440	0.00215	pigment metabolic process
GO:0034754	0.00231	cellular hormone metabolic process
GO:0050826	0.00234	response to freezing
GO:0009611	0.00259	response to wounding
GO:0009267	0.00263	cellular response to starvation
GO:0006635	0.00271	fatty acid beta-oxidation
GO:0006631	0.00293	fatty acid metabolic process
GO:0009648	0.00296	photoperiodism
GO:0010200	0.003	response to chitin
GO:0032870	0.00307	cellular response to hormone stimulus
GO:2001252	0.0031	positive regulation of chromosome organization
GO:0044764	0.00318	multi-organism cellular process
GO:0010638	0.00331	positive regulation of organelle organization
GO:0048366	0.00333	leaf development
GO:0071215	0.00368	cellular response to abscisic acid stimulus
GO:0071495	0.00372	cellular response to endogenous stimulus
GO:0016567	0.00378	protein ubiquitination
GO:0097164	0.0039	ammonium ion metabolic process
GO:0043269	0.00392	regulation of ion transport
GO:0071396	0.00404	cellular response to lipid
GO:0006572	0.00454	tyrosine catabolic process
GO:0010045	0.00454	response to nickel cation
GO:0010424	0.00454	DNA methylation on cytosine within a CG sequence
GO:0032351	0.00454	negative regulation of hormone metabolic process
GO:0032353	0.00454	negative regulation of hormone biosynthetic process
GO:0032973	0.00454	amino acid export
GO:0045836	0.00454	positive regulation of meiotic nuclear division
GO:0051785	0.00454	positive regulation of nuclear division
GO:0071289	0.00454	cellular response to nickel ion
GO:1900992	0.00454	(-)-secologanin metabolic process
GO:1900994	0.00454	(-)-secologanin biosynthetic process
GO:1901806	0.00454	beta-glucoside biosynthetic process
GO:1901999	0.00454	homogentisate metabolic process
GO:1902000	0.00454	homogentisate catabolic process
GO:0032446	0.00459	protein modification by small protein conjugation
GO:0000079	0.00462	regulation of cyclin-dependent protein serine/threonine kinase activity
GO:0009269	0.00462	response to desiccation
GO:0016143	0.00462	S-glycoside metabolic process
GO:0019757	0.00462	glycosinolate metabolic process
GO:0019760	0.00462	glucosinolate metabolic process
GO:0034440	0.00471	lipid oxidation
GO:0032787	0.00491	monocarboxylic acid metabolic process
GO:0006790	0.00492	sulfur compound metabolic process
GO:0009893	0.00509	positive regulation of metabolic process
GO:1902074	0.00524	response to salt
GO:0033043	0.00537	regulation of organelle organization
GO:1901136	0.0054	carbohydrate derivative catabolic process
GO:0071310	0.00548	cellular response to organic substance
GO:0071241	0.00564	cellular response to inorganic substance
GO:1904029	0.00656	regulation of cyclin-dependent protein kinase activity
GO:0016226	0.00669	iron-sulfur cluster assembly
GO:0031163	0.00669	metallo-sulfur cluster assembly
GO:0097306	0.00672	cellular response to alcohol
GO:0050832	0.0068	defense response to fungus
GO:0009056	0.00723	catabolic process
GO:0071900	0.00724	regulation of protein serine/threonine kinase activity
GO:0048518	0.00727	positive regulation of biological process
GO:0010604	0.00766	positive regulation of macromolecule metabolic process
GO:0009891	0.00776	positive regulation of biosynthetic process
GO:0098771	0.00783	inorganic ion homeostasis
GO:0044070	0.00805	regulation of anion transport
GO:0071248	0.00805	cellular response to metal ion
GO:1902275	0.00805	regulation of chromatin organization
GO:1903308	0.00805	regulation of chromatin modification
GO:0048573	0.0081	photoperiodism, flowering
GO:0001676	0.0087	long-chain fatty acid metabolic process
GO:0009959	0.0087	negative gravitropism
GO:0010264	0.0087	myo-inositol hexakisphosphate biosynthetic process
GO:0019375	0.0087	galactolipid biosynthetic process
GO:0033517	0.0087	myo-inositol hexakisphosphate metabolic process
GO:0040020	0.0087	regulation of meiotic nuclear division
GO:0016569	0.00881	covalent chromatin modification
GO:0051128	0.00881	regulation of cellular component organization
GO:0009294	0.00912	DNA mediated transformation
GO:0006310	0.00917	DNA recombination
GO:0030258	0.00949	lipid modification
GO:0009690	0.00967	cytokinin metabolic process
GO:0006082	0.00987	organic acid metabolic process
GO:0048583	0.00987	regulation of response to stimulus

## Sheet: 37 profile dark GO
REG-MAP				REVIGO
GO.ID	p-value	Description		GO. ID	log10 p-value	Description
GO:0006241	0.0004	CTP biosynthetic process		GO:0009148	-3.3979	pyrimidine nucleoside triphosphate biosynthetic process
GO:0009148	0.0004	pyrimidine nucleoside triphosphate biosynthetic process		GO:0009611	-2.3969	response to wounding
GO:0009208	0.0004	pyrimidine ribonucleoside triphosphate metabolic process		GO:0034728	-2.1851	nucleosome organization
GO:0009209	0.0004	pyrimidine ribonucleoside triphosphate biosynthetic process		GO:0006949	-2.4962	syncytium formation
GO:0046036	0.0004	CTP metabolic process		GO:0044723	-2.1831	single-organism carbohydrate metabolic process
GO:0009147	0.00052	pyrimidine nucleoside triphosphate metabolic process		GO:0046164	-2.0926	alcohol catabolic process
GO:0044210	0.00093	'de novo' CTP biosynthetic process		GO:0046132	-2.9281	pyrimidine ribonucleoside biosynthetic process
GO:0009218	0.00118	pyrimidine ribonucleotide metabolic process		GO:0019318	-2.2652	hexose metabolic process
GO:0009220	0.00118	pyrimidine ribonucleotide biosynthetic process		GO:0009147	-3.284	pyrimidine nucleoside triphosphate metabolic process
GO:0046132	0.00118	pyrimidine ribonucleoside biosynthetic process
GO:0046134	0.00118	pyrimidine nucleoside biosynthetic process
GO:0006213	0.00256	pyrimidine nucleoside metabolic process
GO:0046131	0.00256	pyrimidine ribonucleoside metabolic process
GO:0006949	0.00319	syncytium formation
GO:0009611	0.00401	response to wounding
GO:0019318	0.00543	hexose metabolic process
GO:0006221	0.00568	pyrimidine nucleotide biosynthetic process
GO:0006334	0.00615	nucleosome assembly
GO:0006220	0.00626	pyrimidine nucleotide metabolic process
GO:0034728	0.00653	nucleosome organization
GO:0044723	0.00656	single-organism carbohydrate metabolic process
GO:0031497	0.00734	chromatin assembly
GO:0006333	0.00777	chromatin assembly or disassembly
GO:0046164	0.00808	alcohol catabolic process
GO:0005996	0.00838	monosaccharide metabolic process
GO:0006012	0.00962	galactose metabolic process

[truncated: 3 more sheets: 39 profile dark GO, Combind GO  for profiles 23-39 , STEM profiles Log2FoldChange]
