# Supplementary material for: Transcriptional Programs and Regulators Underlying Age-Dependent and Dark-Induced Senescence in Medicago truncatula
Source: Cells. 2022 May 6;11(9):1570. doi: 10.3390/cells11091570 (PMC9103780; doi:10.3390/cells11091570)
Supplement: Supplementary file 1 [file cells-11-01570-s001.zip › Supplementary Dataset S8. Comparison of age-dependent and dark-induced senescence transcriptome profiles.xlsx]

## Sheet: Genes comparison
1477gene"Up age"	1608 genes "Up-Age-Dark":	4773 genes "Up-Dark"		1580 genes"Down age"	2259 genes "Down age-dark"	5710 genes "Down-dark"
Medtr2g043020	Medtr2g043030	Medtr2g087900		Medtr1g077580	Medtr4g075510	Medtr2g014370
Medtr7g012040	Medtr5g056140	Medtr2g045280		Medtr3g090900	Medtr5g091980	Medtr8g076830
Medtr7g068370	Medtr2g043040	Medtr2g101660		Medtr8g432510	Medtr8g099365	Medtr8g080460
Medtr4g121570	Medtr3g103210	Medtr1g110550		Medtr1g061530	Medtr8g028410	Medtr4g100450
Medtr7g007820	Medtr2g023810	Medtr8g091290		Medtr2g093010	Medtr8g058330	Medtr5g039530
Medtr4g125620	Medtr5g064950	Medtr8g447340		Medtr1g110180	Medtr7g056103	Medtr4g116210
Medtr2g043050	Medtr2g094020	Medtr7g066690		Medtr4g094695	Medtr7g060220	Medtr2g450870
Medtr4g086165	Medtr1g081420	Medtr6g059530		Medtr6g007980	Medtr8g028230	Medtr1g022355
Medtr2g101650	Medtr3g467290	Medtr4g088760		Medtr8g028150	Medtr4g123940	Medtr4g064780
Medtr5g018480	Medtr0056s0160	Medtr2g055790		Medtr4g006940	Medtr8g099945	Medtr5g011410
Medtr1g056870	Medtr1g103420	Medtr5g017670		Medtr7g079080	Medtr8g077420	Medtr2g099510
Medtr1g085750	Medtr3g088855	Medtr6g016650		Medtr3g103110	Medtr2g022710	Medtr8g031630
Medtr1g090737	Medtr2g059890	Medtr5g033520		Medtr7g100230	Medtr4g093580	Medtr8g079030
Medtr8g077330	Medtr3g024520	Medtr1g077520		Medtr5g013780	Medtr8g007140	Medtr3g026020
Medtr5g031610	Medtr2g023760	Medtr5g073200		Medtr7g103030	Medtr3g064510	Medtr1g012030
Medtr4g009340	Medtr1g011600	Medtr7g024750		Medtr1g022160	Medtr4g115580	Medtr2g086610
Medtr3g034130	Medtr6g005630	Medtr8g067275		Medtr1g017270	Medtr7g015950	Medtr3g115620
Medtr1g048360	Medtr1g007830	Medtr5g019120		Medtr1g073740	Medtr1g018590	Medtr6g074650
Medtr2g023830	Medtr2g013010	Medtr5g090070		Medtr4g113335	Medtr8g071130	Medtr2g437180
Medtr1g056840	Medtr5g045770	Medtr8g024120		Medtr1g097935	Medtr0034s0170	Medtr5g035590
Medtr2g023660	Medtr8g041870	Medtr1g022315		Medtr4g075790	Medtr4g112810	Medtr4g103790
Medtr3g065080	Medtr7g077180	Medtr8g461330		Medtr1g025490	Medtr1g010260	Medtr2g055850
Medtr7g013610	Medtr4g026080	Medtr1g113970		Medtr4g091240	Medtr4g049410	Medtr5g026390
Medtr1g102810	Medtr6g027740	Medtr6g016640		MT4Noble_024364	Medtr6g043790	Medtr1g026990
Medtr7g109440	Medtr4g068860	Medtr1g070015		Medtr4g126970	Medtr8g068210	Medtr5g025520
Medtr5g019580	Medtr3g435150	Medtr6g016635		Medtr4g113530	Medtr4g051698	Medtr7g053520
Medtr5g007450	Medtr5g045710	Medtr2g103490		Medtr7g033410	Medtr7g070200	Medtr3g078260
Medtr2g097350	Medtr7g090420	Medtr3g107500		Medtr4g127220	Medtr3g062640	Medtr4g063945
Medtr5g035240	Medtr2g072910	Medtr7g026993		Medtr1g096200	Medtr8g083150	Medtr1g040145
Medtr6g471740	Medtr1g073770	Medtr2g079320		Medtr5g020990	Medtr2g450880	Medtr7g013730
Medtr5g007460	Medtr3g026330	Medtr4g025730		Medtr1g104890	Medtr8g080050	Medtr4g084630
Medtr2g023730	Medtr7g011950	Medtr4g129650		Medtr0184s0040	Medtr7g033320	Medtr3g461440
Medtr1g019590	Medtr1g070020	Medtr2g020710		Medtr7g117395	Medtr1g093630	Medtr8g099160
Medtr2g097390	Medtr1g017840	Medtr1g059630		Medtr1g041285	Medtr1g007920	Medtr1g075640
Medtr2g023790	Medtr6g027730	Medtr5g098170		Medtr3g028260	Medtr7g094650	Medtr4g091730
Medtr6g043240	Medtr2g105800	Medtr6g042610		Medtr8g089830	Medtr2g079050	Medtr4g024550
Medtr5g058530	Medtr4g063500	Medtr2g076590		Medtr7g033770	Medtr5g036580	Medtr6g009330
Medtr5g071410	Medtr1g036490	Medtr8g102150		Medtr4g090970	Medtr7g101425	Medtr7g034390
Medtr7g100100	Medtr2g104380	Medtr5g005920		Medtr5g074970	Medtr8g019020	Medtr4g048000
Medtr7g093090	Medtr6g042660	Medtr5g019350		Medtr4g059730	Medtr3g022400	Medtr1g031210
Medtr1g056880	Medtr8g076880	Medtr6g042290		Medtr2g075770	Medtr4g127480	Medtr3g099780
Medtr8g083520	Medtr1g075540	Medtr7g085630		Medtr5g030990	Medtr1g013790	Medtr1g085680
Medtr7g075620	Medtr3g086880	Medtr3g096400		Medtr4g123030	Medtr1g105650	Medtr5g099290
MT4Noble_019329	Medtr4g086160	Medtr1g077260		Medtr3g103410	MT4Noble_026511	MT4Noble_014994
Medtr1g102830	Medtr1g075340	Medtr1g009900		Medtr5g081460	Medtr1g008500	Medtr3g099850
Medtr2g023650	Medtr3g021430	Medtr8g080370		Medtr1g442790	Medtr3g101400	Medtr1g090120
Medtr1g037580	Medtr5g090250	Medtr7g083410		Medtr0419s0050	Medtr3g041560	Medtr4g007070
Medtr2g082590	Medtr2g056070	Medtr5g015880		Medtr1g090770	Medtr1g027700	Medtr2g031250
Medtr7g112560	Medtr3g058710	Medtr3g080850		Medtr5g018290	Medtr1g064060	Medtr7g104890
Medtr2g097310	MT4Noble_004686	Medtr4g088765		Medtr2g069320	Medtr1g022290	Medtr1g112370
Medtr0010s0050	Medtr5g081070	Medtr1g060490		Medtr1g094930	Medtr3g109030	Medtr2g058580
MT4Noble_027564	Medtr8g058350	Medtr4g088955		Medtr2g011660	Medtr7g082700	MT4Noble_056757
Medtr7g009790	Medtr5g019010	Medtr5g030620		Medtr7g116870	Medtr2g062920	Medtr2g101900
Medtr7g025130	Medtr4g094550	Medtr4g124460		Medtr4g052460	Medtr1g081230	Medtr1g010050
Medtr1g016170	Medtr5g083500	Medtr2g035190		Medtr5g022880	Medtr5g012920	Medtr5g430520
Medtr6g036450	Medtr4g118355	Medtr4g086040		Medtr2g069350	Medtr3g079390	Medtr4g125970
Medtr8g010530	Medtr2g068760	Medtr6g037610		Medtr2g100060	Medtr0087s0030	Medtr2g089665
MT4Noble_029526	Medtr1g070185	Medtr4g098480		Medtr3g102010	Medtr1g110210	Medtr8g005790
Medtr1g050145	Medtr2g075780	Medtr7g102500		Medtr8g042770	Medtr7g011800	Medtr4g093825
Medtr8g058780	Medtr4g072350	Medtr4g087460		Medtr2g090675	Medtr2g040500	Medtr5g093830
Medtr1g079760	Medtr4g127670	Medtr4g120200		Medtr4g088160	Medtr2g461270	Medtr1g093990
Medtr4g118480	Medtr2g020510	Medtr7g084350		Medtr5g012220	Medtr2g063110	Medtr1g088375
Medtr7g065710	Medtr2g047968	Medtr7g110830		Medtr4g062170	Medtr2g086090	Medtr4g107580
Medtr1g102780	Medtr1g115210	Medtr5g024940		Medtr2g435340	Medtr3g072210	Medtr2g072330
Medtr8g061260	Medtr2g029560	Medtr2g029740		Medtr7g106050	Medtr2g046710	Medtr1g066900
Medtr2g096120	Medtr2g029750	Medtr1g023530		Medtr0078s0190	Medtr6g033100	Medtr6g081020
Medtr2g089530	Medtr2g031590	Medtr4g088200		Medtr5g026620	Medtr2g062660	Medtr8g094150
Medtr4g086190	Medtr5g035610	Medtr4g025690		Medtr5g010520	Medtr0470s0010	Medtr3g020670
Medtr3g064260	Medtr2g083920	Medtr1g492860		Medtr4g059870	Medtr7g065890	Medtr1g013070
Medtr0131s0030	Medtr4g094555	Medtr3g077040		Medtr1g094155	Medtr4g051738	Medtr7g024765
Medtr4g051000	Medtr0650s0010	Medtr4g478180		Medtr4g028080	Medtr6g034975	Medtr5g032010
Medtr3g105510	Medtr3g101960	Medtr5g071350		Medtr7g117405	Medtr1g022455	Medtr3g040410
Medtr5g009870	Medtr1g080990	Medtr4g106500		Medtr3g014615	Medtr4g011880	Medtr3g070120
Medtr3g479470	Medtr4g032865	Medtr5g017680		Medtr7g096340	Medtr5g030600	Medtr2g030875
Medtr1g072380	Medtr1g069620	Medtr1g015020		Medtr6g015310	Medtr5g048160	Medtr4g017880
Medtr6g009510	Medtr7g063280	Medtr0020s0120		Medtr3g074830	MT4Noble_026513	Medtr7g090980
Medtr4g118470	Medtr5g016090	Medtr5g032220		Medtr7g010750	MT4Noble_026512	Medtr3g114070
MT4Noble_046169	Medtr2g100450	Medtr3g101410		Medtr1g086170	Medtr4g094608	Medtr2g102140
Medtr4g119790	Medtr5g075650	MT4Noble_004459		Medtr4g114710	Medtr8g099515	Medtr1g050530
Medtr7g108420	Medtr4g019225	Medtr1g070010		Medtr0419s0040	Medtr7g106760	Medtr6g013210
Medtr7g105670	Medtr8g076290	Medtr3g108830		Medtr5g075450	Medtr8g073130	Medtr4g055990
Medtr3g054330	Medtr5g040430	Medtr5g016440		Medtr6g083730	Medtr7g096120	Medtr4g035170
Medtr2g068880	Medtr4g036150	Medtr7g077190		Medtr7g109200	Medtr2g028190	Medtr3g070033
Medtr5g065600	Medtr2g435490	Medtr3g071470		Medtr6g478020	Medtr8g038370	Medtr6g092720
Medtr3g048590	Medtr2g031600	Medtr4g114080		Medtr4g103970	Medtr5g091190	Medtr4g045980
Medtr1g037680	Medtr5g010640	Medtr3g085030		Medtr5g009920	Medtr1g098680	MT4Noble_051644
Medtr7g110580	Medtr3g072560	Medtr3g110590		Medtr1g061220	Medtr2g014020	Medtr7g451040
Medtr5g010940	Medtr1g100763	Medtr7g010750		Medtr3g051770	Medtr8g104490	Medtr2g015040
Medtr6g033890	Medtr3g063310	Medtr4g095330		Medtr5g018720	Medtr4g005190	Medtr6g092940
Medtr3g117825	Medtr3g083760	Medtr1g095970		Medtr6g009720	Medtr4g022430	Medtr7g086640
Medtr2g079000	Medtr5g023120	Medtr2g035120		Medtr4g087980	Medtr8g011300	Medtr1g068955
Medtr4g099510	Medtr4g094772	Medtr4g081380		Medtr6g016470	Medtr2g054940	Medtr3g086650
Medtr4g114870	Medtr5g088770	Medtr8g089340		Medtr5g040970	Medtr1g026820	Medtr3g115240
Medtr4g086220	Medtr5g006950	Medtr8g045570		Medtr7g116890	Medtr2g019860	Medtr1g027840
Medtr8g086820	Medtr3g464700	Medtr1g016620		Medtr1g025340	Medtr5g019220	Medtr5g075630
Medtr7g109420	Medtr7g068650	Medtr7g072470		Medtr8g024540	MT4Noble_034374	Medtr8g076590
Medtr5g069230	Medtr3g095680	Medtr1g060500		Medtr0036s0010	Medtr8g032030	Medtr7g011100
Medtr1g014510	Medtr1g076930	Medtr6g024050		Medtr1g423960	Medtr2g034440	Medtr8g086040
Medtr1g047620	Medtr4g126160	Medtr2g030400		Medtr6g478010	Medtr4g068240	Medtr0095s0080
Medtr7g109580	Medtr6g059410	Medtr4g090600		Medtr6g080710	Medtr8g020300	Medtr3g094220
Medtr1g099470	Medtr8g096910	Medtr6g087770		Medtr1g099550	Medtr2g027410	MT4Noble_032046
Medtr5g088410	Medtr4g104570	Medtr1g077890		Medtr2g014550	Medtr3g094650	Medtr5g010025
Medtr6g033895	Medtr8g022340	Medtr2g043730		Medtr3g058880	Medtr1g009270	Medtr4g083940
Medtr8g038620	Medtr1g027170	Medtr5g066070		Medtr4g124960	Medtr7g006540	Medtr8g089985
Medtr6g071340	Medtr7g074865	Medtr7g098780		Medtr4g027040	Medtr3g008160	Medtr7g097270
Medtr3g078860	Medtr3g103190	MT4Noble_003367		Medtr6g004200	Medtr2g090250	Medtr3g091570
Medtr4g069810	Medtr4g104540	Medtr6g007633		Medtr6g028110	Medtr8g104520	Medtr4g134770
Medtr1173s0010	Medtr2g022560	Medtr1g084220		Medtr7g024760	Medtr1g105800	Medtr1452s0010
Medtr7g079320	Medtr3g025230	Medtr8g096730		Medtr2g013310	Medtr8g060850	Medtr4g061320
Medtr2g010450	Medtr7g103200	Medtr2g450680		Medtr7g095410	Medtr2g012320	Medtr5g027470
Medtr4g124160	Medtr7g011900	Medtr5g043330		Medtr1g107425	Medtr3g090120	Medtr4g106410
Medtr1g104555	Medtr3g108990	MT4Noble_001008		Medtr4g019210	Medtr3g077640	Medtr7g093560
Medtr3g117690	Medtr8g076910	Medtr3g102970		Medtr1g085140	Medtr1g089280	Medtr5g090600
Medtr1g069940	Medtr2g035130	Medtr2g030405		Medtr6g083810	Medtr4g014350	Medtr2g012990
Medtr6g012640	Medtr1g028890	Medtr5g086020		Medtr3g113920	Medtr4g119830	Medtr4g129820
Medtr8g106150	Medtr6g012830	Medtr7g024520		Medtr0002s0270	Medtr6g083270	Medtr8g099060
Medtr3g434920	Medtr4g083140	Medtr7g069930		Medtr0277s0020	Medtr7g013180	Medtr6g032915
Medtr3g058390	Medtr4g104550	Medtr7g027610		Medtr6g069560	Medtr8g470380	Medtr6g463260
Medtr1g102800	Medtr3g114750	Medtr8g012240		Medtr6g086340	Medtr6g023340	Medtr4g075110
MT4Noble_054194	Medtr3g090350	Medtr8g024520		Medtr7g106080	Medtr4g082883	MT4Noble_047136
Medtr5g007550	Medtr2g028580	Medtr4g088770		Medtr5g090620	Medtr4g099140	Medtr1g032860
Medtr7g102550	Medtr3g111530	Medtr3g111970		Medtr4g087925	Medtr3g072260	Medtr4g108370
Medtr1g045610	Medtr1g017830	Medtr1g027290		Medtr3g107100	Medtr4g052290	Medtr7g060760
Medtr8g098485	Medtr8g104290	Medtr7g066780		Medtr8g091280	Medtr2g095430	Medtr4g094100
Medtr7g012250	Medtr6g016820	Medtr0005s0150		Medtr3g035650	Medtr5g066187	Medtr1g037260
Medtr6g012970	Medtr4g108760	Medtr7g100335		Medtr8g005530	Medtr3g009030	Medtr0283s0030
Medtr8g096500	Medtr6g007767	Medtr3g109100		MT4Noble_009772	MT4Noble_017811	Medtr8g105860
Medtr3g463730	Medtr3g051220	Medtr1g009190		Medtr6g083320	Medtr1g022245	Medtr5g072780
Medtr8g041330	Medtr3g049150	Medtr5g096390		Medtr2g008430	Medtr7g087570	Medtr4g046110
Medtr5g010930	Medtr7g063270	Medtr1g062370		Medtr1g061590	Medtr7g069540	Medtr7g083790
Medtr5g097300	Medtr2g015750	Medtr7g427690		Medtr3g083470	Medtr2g035170	Medtr7g086830
Medtr3g078410	Medtr4g132000	Medtr4g057515		Medtr3g035630	Medtr8g089670	Medtr5g057670
Medtr8g088860	Medtr3g088520	Medtr8g073960		Medtr8g006600	Medtr8g087425	Medtr5g034820
Medtr4g102660	Medtr7g014510	Medtr3g111020		Medtr8g042070	Medtr6g007743	Medtr4g117880
Medtr5g094990	Medtr6g046930	Medtr1g025450		Medtr3g085890	Medtr4g105750	Medtr8g046300
Medtr5g077510	Medtr8g041390	Medtr3g102370		Medtr7g050425	Medtr7g061830	Medtr2g010160
Medtr4g077960	Medtr2g035150	Medtr3g052900		Medtr5g063760	Medtr5g022450	Medtr5g032440
Medtr7g076600	Medtr7g106340	Medtr2g023770		Medtr5g092190	Medtr2g011210	Medtr2g008180
Medtr4g064570	Medtr5g090910	Medtr4g087100		Medtr7g071110	Medtr1g019280	Medtr4g098660
Medtr3g087330	Medtr7g098750	Medtr5g074600		Medtr7g016720	Medtr7g086770	Medtr1g081260
Medtr1g026380	Medtr3g092635	Medtr4g081880		Medtr3g031040	MT4Noble_039344	Medtr7g111600
Medtr0008s0390	Medtr7g068430	Medtr4g016720		Medtr1g054175	MT4Noble_039345	Medtr1g009980
Medtr3g032520	Medtr7g113980	Medtr6g086170		MT4Noble_054828	Medtr4g081750	Medtr1g070840
Medtr8g028475	Medtr2g023010	Medtr5g017850		Medtr8g005410	Medtr1g492760	Medtr8g055840
Medtr1g102570	MT4Noble_014659	Medtr2g097580		Medtr2g097473	Medtr8g005225	Medtr1g110750
Medtr5g023980	Medtr7g101740	Medtr7g102840		Medtr7g104250	Medtr1g086340	Medtr4g005390
Medtr3g045020	Medtr7g069980	Medtr7g098930		Medtr2g011180	Medtr6g081410	Medtr0332s0020
Medtr6g042310	Medtr2g070550	MT4Noble_000350		Medtr7g114130	Medtr8g026680	Medtr2g031720
Medtr6g015965	Medtr4g132380	Medtr4g081110		Medtr8g006575	Medtr1g105750	Medtr7g076660
Medtr1g090680	Medtr1g015980	Medtr5g020060		Medtr4g006040	Medtr5g016610	Medtr8g075480
Medtr2g086920	Medtr4g128470	Medtr4g058730		Medtr4g018880	Medtr4g094925	Medtr1g069780
Medtr4g050130	Medtr8g089825	Medtr3g095720		Medtr3g071980	Medtr4g045810	Medtr5g008070
Medtr3g434890	Medtr2g055430	MT4Noble_025786		Medtr3g035635	Medtr1g015140	Medtr8g074010
Medtr4g114320	Medtr4g099260	Medtr1g104750		Medtr1g017170	Medtr0086s0010	Medtr1g017770
Medtr3g019120	Medtr7g028020	Medtr7g107570		Medtr3g092900	Medtr7g007440	Medtr8g018360
Medtr1g031060	Medtr2g101090	Medtr5g033720		Medtr2g008390	Medtr4g073720	Medtr8g031010
Medtr2g090035	Medtr2g034340	Medtr7g010790		Medtr4g011790	Medtr1g115870	Medtr4g075580
Medtr1g108640	Medtr7g020980	Medtr3g080330		Medtr2g100210	Medtr5g069010	Medtr8g088030
Medtr4g094732	Medtr7g009820	Medtr1g066430		Medtr7g093213	Medtr6g083010	Medtr0018s0290
Medtr2g088590	Medtr4g118800	Medtr4g072260		Medtr3g110630	Medtr7g110000	Medtr6g048350
Medtr4g050140	Medtr8g077290	Medtr7g027960		Medtr6g074090	Medtr7g069500	Medtr2g100870
Medtr7g009670	MT4Noble_006312	Medtr3g087080		Medtr8g005420	Medtr3g048910	Medtr3g117620
Medtr3g014240	Medtr3g115600	Medtr1g057640		Medtr3g061630	Medtr1g069235	Medtr8g016580
Medtr4g055580	Medtr8g103233	Medtr5g090830		Medtr3g062220	Medtr1g024840	Medtr7g108490
Medtr3g093360	Medtr7g055660	Medtr6g078290		Medtr1g015165	Medtr0036s0070	Medtr2g090910
Medtr4g082810	Medtr2g073010	MT4Noble_049539		Medtr8g006690	Medtr1g105495	Medtr1g034000
Medtr3g015420	Medtr3g092425	Medtr2g064950		Medtr8g067490	Medtr6g033055	Medtr3g078550
Medtr7g096870	Medtr4g094570	Medtr7g446220		Medtr1g090060	Medtr6g082480	Medtr5g004680
Medtr4g105220	Medtr7g035095	Medtr2g075530		Medtr4g088385	Medtr6g014187	Medtr7g073340
Medtr5g095420	MT4Noble_046690	Medtr7g110790		Medtr4g051270	Medtr7g103180	Medtr4g035850
Medtr8g067280	Medtr4g009510	Medtr4g010320		Medtr7g015970	Medtr2g028480	MT4Noble_040766
Medtr8g032890	Medtr4g099010	Medtr2g024260		Medtr4g133450	Medtr2g043900	Medtr4g118640
Medtr1g063330	Medtr3g104030	Medtr7g087100		Medtr8g040640	Medtr2g038040	Medtr2g008990
Medtr6g080680	Medtr2g072400	Medtr3g079190		Medtr4g050910	MT4Noble_037207	Medtr2g087000
Medtr5g430430	Medtr4g014970	Medtr4g032885		Medtr6g007110	Medtr4g101260	Medtr3g074230
MT4Noble_002654	Medtr7g065265	Medtr1g096750		MT4Noble_054823	Medtr6g074160	Medtr2g070400
Medtr3g434960	Medtr1g111300	Medtr1g087380		MT4Noble_021938	Medtr3g084090	Medtr4g095000
Medtr3g479620	Medtr2g064940	Medtr0113s0040		Medtr7g092710	Medtr7g007560	Medtr2g103795
Medtr5g086810	Medtr7g114020	Medtr7g084760		Medtr2g027130	Medtr1g043350	Medtr7g022890
Medtr5g030290	Medtr1g029150	Medtr4g086710		Medtr6g033280	Medtr4g094240	Medtr4g134950
Medtr3g092260	Medtr1g044155	Medtr8g093440		Medtr7g114250	Medtr2g074980	Medtr5g019860
Medtr4g087120	Medtr5g043880	Medtr5g087760		MT4Noble_054824	Medtr2g101980	Medtr6g082590
Medtr1g111150	Medtr7g077160	Medtr4g131920		Medtr5g089320	Medtr8g030620	Medtr0089s0100
Medtr7g069970	Medtr1g088620	Medtr5g024670		Medtr5g029620	Medtr2g070460	Medtr7g079840
MT4Noble_026425	Medtr1g088640	Medtr2g078790		Medtr8g099410	Medtr8g012585	Medtr3g069210
Medtr1g103690	Medtr2g096210	Medtr5g018610		Medtr0041s0130	Medtr3g449240	Medtr8g028765
Medtr7g110370	Medtr2g064400	Medtr4g128400		Medtr7g021770	Medtr1g075490	Medtr3g076950
Medtr1g026160	Medtr5g013230	Medtr3g110595		Medtr4g059390	Medtr5g056550	MT4Noble_004422
Medtr6g088375	MT4Noble_019825	Medtr5g065520		Medtr7g080230	Medtr1g094780	Medtr7g114970
Medtr7g073250	Medtr5g010635	Medtr4g085890		Medtr6g016480	Medtr2g079030	Medtr4g080740
Medtr6g079440	Medtr3g034370	Medtr1g019480		Medtr5g091950	Medtr4g017820	Medtr4g074590
Medtr5g011820	Medtr8g445800	Medtr5g011750		Medtr7g117930	Medtr0591s0010	Medtr2g009220
Medtr8g099765	Medtr1g071150	Medtr1g040420		Medtr5g080940	Medtr7g071440	Medtr3g452770
Medtr8g062270	Medtr3g089090	Medtr2g062770		Medtr3g096910	Medtr4g094805	Medtr4g032895
Medtr4g104870	Medtr2g438630	Medtr2g087460		MT4Noble_003209	Medtr7g099820	Medtr7g026520
Medtr5g082150	Medtr4g117040	Medtr5g012860		Medtr6g091635	Medtr1g069200	Medtr5g019790
Medtr7g099260	Medtr1g081610	Medtr8g007435		Medtr2g013070	Medtr3g062570	Medtr1g105855
Medtr3g479610	MT4Noble_049083	Medtr1g100355		Medtr6g055010	Medtr3g094130	Medtr2g101920
Medtr2g096230	Medtr3g450310	Medtr2g103480		Medtr5g087510	MT4Noble_026515	Medtr6g007773
Medtr5g086945	Medtr1g103290	Medtr7g076770		Medtr7g072560	Medtr1g016070	Medtr3g435320
Medtr3g104920	Medtr7g011390	Medtr1g040500		MT4Noble_054825	Medtr5g093050	Medtr3g465100
Medtr2g021150	Medtr3g085460	Medtr8g068265		Medtr7g021850	Medtr8g089800	Medtr4g021175
Medtr2g097620	Medtr2g018175	Medtr8g036105		Medtr7g078150	Medtr2g098070	Medtr3g074500
Medtr5g011800	Medtr3g069310	Medtr4g099320		Medtr7g109390	Medtr4g072600	Medtr6g013660
Medtr5g045920	Medtr7g063260	Medtr1g023270		Medtr2g013780	Medtr1g097910	Medtr8g071070
Medtr8g469630	Medtr4g081870	Medtr8g015250		Medtr7g095230	Medtr0415s0010	Medtr1g076310
Medtr4g094488	Medtr4g116610	MT4Noble_056922		Medtr5g061550	Medtr7g108905	Medtr4g068457
Medtr5g015840	Medtr3g088845	MT4Noble_056923		Medtr8g107730	Medtr4g016790	Medtr4g104830
Medtr5g058595	Medtr4g053250	Medtr1g071610		Medtr1g007540	Medtr5g095190	Medtr8g105200
Medtr8g005010	Medtr1g061870	Medtr4g129290		Medtr2g093970	Medtr5g053950	Medtr1g027710
Medtr3g088630	Medtr4g070640	Medtr1g069070		MT4Noble_054822	Medtr1g078000	Medtr8g106080
Medtr3g452760	Medtr3g016355	Medtr4g021470		Medtr8g069160	Medtr7g015710	Medtr1g007370
Medtr1g114220	Medtr2g008110	Medtr5g095200		Medtr4g055170	Medtr3g078740	Medtr4g109610
Medtr7g051910	Medtr5g092040	Medtr4g066250		Medtr4g451295	Medtr6g072780	Medtr1g041345
Medtr6g038540	Medtr1g088430	Medtr8g035680		MT4Noble_009941	Medtr2g019950	Medtr5g011460
Medtr5g048470	Medtr7g093870	Medtr3g115210		Medtr3g035620	Medtr0263s0020	Medtr4g094905
Medtr0365s0030	Medtr7g092430	Medtr3g094120		MT4Noble_021940	Medtr5g031860	Medtr6g069400
Medtr7g086640	Medtr2g087350	Medtr5g078020		Medtr6g074860	Medtr4g017850	Medtr4g119860
Medtr7g082760	Medtr4g068990	Medtr8g079010		MT4Noble_021936	Medtr4g027840	Medtr4g107760
Medtr3g078613	Medtr7g075580	Medtr1g055325		MT4Noble_021937	Medtr1g112630	Medtr3g463610
Medtr8g096220	Medtr1g027160	Medtr3g096950		Medtr4g109770	Medtr3g110122	Medtr7g094250
Medtr1g062710	Medtr0119s0010	Medtr8g036130		Medtr8g020690	Medtr3g012440	Medtr4g057970
Medtr2g044440	Medtr8g012090	Medtr2g073220		Medtr8g006815	Medtr8g028720	Medtr7g118240
Medtr1g018420	Medtr1g064170	Medtr3g013530		Medtr0002s0250	Medtr4g009620	Medtr1g097610
Medtr8g099475	Medtr0119s0020	Medtr4g082365		Medtr2g034910	Medtr4g014280	MT4Noble_033803
Medtr3g450510	Medtr4g078555	MT4Noble_043127		Medtr4g112035	Medtr3g082100	Medtr3g097290
Medtr0400s0040	Medtr5g061510	Medtr1g089000		Medtr7g026890	Medtr5g094820	Medtr1g011720
Medtr5g035910	Medtr8g097390	Medtr2g038625		Medtr4g006070	Medtr3g104750	Medtr6g060170
Medtr2g098420	Medtr1g116890	Medtr6g093100		Medtr4g088810	Medtr5g031300	Medtr5g059910
Medtr1g028350	Medtr5g072960	Medtr2g089450		Medtr1g107550	Medtr7g089905	Medtr5g029590
Medtr8g091690	Medtr4g066130	Medtr1g082320		Medtr8g042780	Medtr2g438440	Medtr3g491830
Medtr6g072600	Medtr1g014180	Medtr2g023820		Medtr8g469180	Medtr6g007070	Medtr8g095680
Medtr1g027150	Medtr8g094290	MT4Noble_022950		Medtr2g438330	Medtr7g065660	Medtr1g027890
Medtr2g012780	Medtr6g018370	Medtr4g087970		Medtr1g054150	Medtr8g099030	Medtr1g115235
Medtr5g087960	Medtr3g464580	Medtr4g029170		Medtr5g077850	Medtr6g034870	Medtr8g006960
Medtr5g020110	Medtr2g063813	Medtr7g096410		Medtr5g027240	Medtr4g095002	Medtr8g023500
Medtr3g099670	Medtr1g106730	Medtr7g114190		Medtr2g014760	Medtr7g101070	Medtr4g094690
Medtr1g082430	Medtr6g022020	MT4Noble_024100		Medtr2g046150	Medtr1g097440	Medtr1g022405
Medtr8g032940	Medtr1g043775	Medtr1g113730		Medtr7g084770	Medtr2g460800	Medtr3g093270
Medtr8g076340	Medtr2g461710	Medtr3g111730		Medtr7g109360	Medtr1g022370	Medtr5g079550
Medtr2g078750	Medtr6g471240	Medtr4g093530		Medtr6g027550	Medtr4g035870	Medtr5g090120
MT4Noble_050062	Medtr6g036920	Medtr3g013500		Medtr1g106430	Medtr2g039620	Medtr2g087740
Medtr8g014020	Medtr4g118350	Medtr4g072910		Medtr6g071410	Medtr3g021090	Medtr4g105140
Medtr4g104430	Medtr1g029500	Medtr1g090450		Medtr3g035680	Medtr8g016070	Medtr4g081420
Medtr8g059425	Medtr7g017530	Medtr5g096820		Medtr4g068520	Medtr5g064500	Medtr3g091920
Medtr7g105840	Medtr5g034230	Medtr1g071450		Medtr7g104360	Medtr4g076255	Medtr8g005485
Medtr7g115180	Medtr4g133250	Medtr4g089115		Medtr1g039020	Medtr8g086600	Medtr5g025950
Medtr6g016325	Medtr8g015220	Medtr4g097540		Medtr2g008240	MT4Noble_034366	Medtr8g099840
Medtr8g056860	Medtr5g095120	Medtr7g068550		MT4Noble_052989	Medtr3g079210	Medtr3g090550
Medtr1g107315	Medtr5g062370	Medtr2g013780		Medtr2g062300	Medtr3g083810	Medtr8g028485
Medtr1g112050	Medtr8g036830	Medtr7g053103		Medtr2g091110	Medtr8g016370	Medtr3g464330
MT4Noble_045446	Medtr3g086890	Medtr1g004990		Medtr1g111350	Medtr1g040360	Medtr5g064080
Medtr1g032290	Medtr1g060890	Medtr4g013250		Medtr4g090580	Medtr3g014608	Medtr4g095065
Medtr5g011990	Medtr3g056620	Medtr3g084990		Medtr3g035610	Medtr7g080370	Medtr3g078647
Medtr5g091600	Medtr4g086740	Medtr2g038580		Medtr5g062660	Medtr3g105650	Medtr8g018480
Medtr7g088850	Medtr3g105730	Medtr2g031750		Medtr6g091680	Medtr8g010000	Medtr8g089655
Medtr2g076320	Medtr2g055920	Medtr8g078960		Medtr4g007540	Medtr1g062630	Medtr6g033025
Medtr3g067980	Medtr4g118590	Medtr8g080570		Medtr7g021780	Medtr2g438470	Medtr3g009730
Medtr2g081580	Medtr8g105190	Medtr2g078580		MT4Noble_024296	Medtr4g129630	Medtr5g085920
Medtr8g099000	Medtr4g015050	Medtr5g014930		Medtr1g051670	Medtr5g007717	Medtr2g055360
Medtr8g432400	Medtr4g093070	Medtr6g079430		MT4Noble_024345	Medtr1g060590	Medtr1g026190
Medtr2g088350	Medtr7g092750	Medtr3g075510		Medtr7g090920	Medtr2g078260	Medtr2g029350
Medtr7g082550	Medtr6g021870	Medtr4g124440		MT4Noble_054821	Medtr4g027800	Medtr8g432620
Medtr8g061030	Medtr5g020860	Medtr1g105980		Medtr6g070890	Medtr2g015850	Medtr4g133660
Medtr1g102070	Medtr3g467370	Medtr2g435310		Medtr1g103160	Medtr3g111600	Medtr8g089630
Medtr3g078380	Medtr6g016260	Medtr3g106290		Medtr3g008500	Medtr3g062020	Medtr4g068000
Medtr2g035660	Medtr2g102730	Medtr7g406880		Medtr8g074530	Medtr7g109340	MT4Noble_046381
Medtr7g102380	Medtr5g037700	Medtr1g095740		Medtr1g108330	Medtr0002s0040	Medtr3g089010
Medtr3g103590	Medtr3g498715	Medtr5g049280		Medtr5g018820	Medtr5g015670	Medtr7g023670
Medtr8g088800	Medtr4g104610	Medtr2g010730		Medtr7g053050	Medtr7g099200	Medtr7g112615
Medtr3g111660	Medtr5g072930	Medtr5g035400		Medtr0009s0100	Medtr1g090937	Medtr8g019570
Medtr2g018870	Medtr4g124910	Medtr4g072750		Medtr3g047390	Medtr5g071860	Medtr4g074930
Medtr7g075185	Medtr3g078160	Medtr6g090060		Medtr3g064780	Medtr8g045735	Medtr1g105545
Medtr1g116370	Medtr6g021830	Medtr8g032290		Medtr5g018270	Medtr3g053710	Medtr6g016680
Medtr5g085580	Medtr3g464650	Medtr2g031520		Medtr4g092010	Medtr1g017950	Medtr4g086760
Medtr4g046040	Medtr6g079540	Medtr5g085280		Medtr8g079380	Medtr3g435460	Medtr4g019370
Medtr7g068340	Medtr3g094210	Medtr5g078500		Medtr8g028725	Medtr1g040215	Medtr3g005730
Medtr8g069675	Medtr8g096130	Medtr7g096360		Medtr1g087880	Medtr5g025270	Medtr3g060670
Medtr4g116530	Medtr7g068380	Medtr3g465510		Medtr4g116360	Medtr3g081170	Medtr2g101500
Medtr5g079980	Medtr2g080280	Medtr2g100470		Medtr6g065430	Medtr7g024950	Medtr5g033090
Medtr6g087260	Medtr5g035690	Medtr5g076060		Medtr7g084760	Medtr5g091310	Medtr8g056860
Medtr0126s0080	Medtr3g012050	MT4Noble_020397		Medtr7g113950	Medtr5g097910	Medtr8g086060
Medtr1g086000	Medtr7g023690	Medtr4g069070		Medtr6g006950	Medtr3g117500	Medtr5g088880
Medtr7g108250	Medtr8g027200	Medtr4g112025		Medtr3g110720	Medtr4g122710	Medtr4g063030
Medtr1g057290	Medtr7g112620	Medtr2g034720		Medtr3g008530	Medtr2g017960	Medtr3g064740
Medtr8g063150	Medtr5g033320	Medtr1g012620		Medtr6g090470	Medtr7g016800	Medtr7g070240
Medtr7g451210	Medtr1g080800	Medtr8g016230		Medtr3g436860	Medtr4g102840	Medtr3g025880
Medtr5g015350	Medtr1g063850	Medtr2g020240		Medtr7g104905	Medtr1g088845	Medtr8g063370
Medtr8g066780	Medtr5g010030	Medtr4g014070		Medtr4g072830	Medtr3g086980	Medtr3g099590
Medtr3g088455	Medtr2g007690	Medtr1g068810		Medtr8g079450	Medtr4g113070	Medtr3g071420
Medtr3g450500	Medtr2g461760	Medtr2g018890		Medtr5g037890	Medtr8g017580	Medtr5g012610
Medtr0009s0370	Medtr2g097800	Medtr3g071740		Medtr5g016440	Medtr2g079500	Medtr4g094295
Medtr4g071620	Medtr1g021070	Medtr1g009180		Medtr5g073240	Medtr1g040195	Medtr2g013210
Medtr7g100810	Medtr8g028600	Medtr4g007240		Medtr2g091250	Medtr1g098140	Medtr2g034160
Medtr3g051530	Medtr1g083950	Medtr1g116660		Medtr1g028300	Medtr7g089920	Medtr5g088850
Medtr5g080000	Medtr4g090525	Medtr1g025490		Medtr7g015180	Medtr1g018440	Medtr3g032110
Medtr1g009840	Medtr2g030100	Medtr7g055630		Medtr6g027580	Medtr6g088445	Medtr0007s0070
Medtr8g009290	Medtr1g100335	Medtr8g086020		Medtr6g045200	Medtr3g026400	Medtr1g032260
Medtr2g080030	Medtr4g073560	Medtr8g096880		Medtr4g088245	Medtr1g029810	Medtr1g073340
Medtr3g010320	Medtr4g015600	Medtr7g079080		Medtr3g117090	Medtr8g098360	Medtr7g086470
Medtr8g036035	Medtr8g464690	Medtr2g027550		Medtr1g041300	Medtr2g096530	Medtr4g131160
Medtr3g117620	Medtr8g022300	Medtr2g099140		Medtr5g028130	Medtr4g056430	Medtr4g095490
Medtr7g026910	Medtr5g004800	Medtr4g046153		Medtr7g033765	Medtr2g088080	Medtr7g100510
Medtr3g027140	Medtr2g014730	Medtr1g039780		Medtr8g033150	Medtr8g099795	MT4Noble_054159
Medtr1g046790	Medtr1g115345	Medtr5g018520		Medtr1g095850	Medtr5g086690	Medtr4g119880
Medtr6g012180	MT4Noble_049810	Medtr7g068500		Medtr6g034030	Medtr6g015995	Medtr1g022360
Medtr7g017570	Medtr4g013245	Medtr7g106420		Medtr5g010120	Medtr7g100880	Medtr4g114330
Medtr0229s0020	Medtr3g022730	Medtr7g063490		Medtr5g430470	Medtr6g057750	Medtr2g019350
Medtr6g008900	Medtr6g071475	MT4Noble_018324		Medtr5g035030	Medtr5g056510	Medtr2g089975
Medtr3g437850	Medtr6g012810	Medtr5g010730		Medtr3g466760	Medtr4g094958	Medtr7g094800
Medtr4g117960	Medtr6g087150	Medtr1g100773		Medtr2g100250	Medtr5g097900	Medtr5g015580
Medtr4g071880	Medtr3g109430	Medtr6g088885		Medtr4g023390	Medtr4g029090	Medtr3g097010
Medtr7g088820	Medtr1g069275	Medtr5g066060		Medtr5g005420	Medtr1g100623	Medtr8g461030
Medtr4g133030	Medtr5g072980	Medtr4g128840		Medtr7g085410	Medtr1g090920	Medtr3g115500
Medtr3g099590	Medtr4g021260	Medtr4g072980		Medtr2g007960	Medtr3g083370	Medtr8g075090
Medtr4g100450	Medtr4g093840	Medtr1g116410		Medtr1g025250	Medtr7g117690	Medtr5g071550
Medtr4g094340	Medtr1g019440	Medtr8g022130		Medtr7g065880	Medtr1g058120	Medtr3g090160
Medtr1g108810	Medtr4g105020	Medtr7g109590		Medtr7g109550	Medtr1g011800	Medtr7g056413
Medtr3g052740	Medtr4g132970	Medtr8g072210		Medtr1g022250	Medtr2g102670	Medtr4g094525
MT4Noble_027038	Medtr1g070345	Medtr8g068390		Medtr3g118010	Medtr5g097940	Medtr8g041190
Medtr7g055793	Medtr7g103900	Medtr1g070350		Medtr4g131920	Medtr6g463700	Medtr7g089300
Medtr1g060550	Medtr3g007630	Medtr1g033900		Medtr1g107055	MT4Noble_013918	Medtr1g025235
Medtr7g091430	Medtr6g033985	Medtr7g086030		Medtr4g129760	Medtr3g077630	Medtr7g104870
Medtr7g026210	Medtr7g101250	Medtr7g104250		Medtr8g432480	Medtr0003s0090	Medtr2g436100
Medtr3g080130	Medtr1g103870	Medtr1g114690		Medtr2g036780	Medtr8g092890	Medtr1g026125
Medtr5g092630	Medtr7g106540	Medtr4g087850		Medtr4g022410	Medtr4g072880	Medtr5g017630
Medtr5g093830	Medtr2g022760	Medtr3g008370		Medtr3g115210	Medtr8g072000	Medtr2g016060
Medtr2g028530	Medtr1g012760	Medtr1g048480		Medtr1g105585	Medtr4g016800	MT4Noble_044287
Medtr8g022040	Medtr4g085900	Medtr4g107930		Medtr5g035580	Medtr3g097260	Medtr8g020870
Medtr8g099160	Medtr4g098900	Medtr7g073520		Medtr4g076570	Medtr7g111770	Medtr7g084170
Medtr8g013990	Medtr3g016290	Medtr5g015020		Medtr8g013810	Medtr3g055750	Medtr5g029750
Medtr3g053220	Medtr3g078210	Medtr3g008500		Medtr7g065630	Medtr3g019160	Medtr3g006730
Medtr3g057910	Medtr8g028565	MT4Noble_032002		Medtr5g042910	Medtr2g014400	Medtr8g017080
Medtr4g093835	Medtr2g039410	Medtr1g033630		Medtr4g103620	Medtr2g084540	Medtr5g042410
Medtr2g095180	Medtr5g094140	Medtr3g105230		Medtr2g014470	Medtr2g041180	Medtr3g452860
Medtr2g087200	Medtr7g056647	Medtr7g104410		Medtr5g015720	Medtr5g099250	Medtr5g074130
Medtr7g090640	Medtr8g032010	Medtr2g044070		Medtr4g093080	Medtr2g008610	Medtr4g048230
Medtr1g112900	Medtr1g068630	Medtr4g104360		MT4Noble_013136	Medtr5g032670	Medtr6g007180
Medtr7g108210	Medtr4g127680	Medtr2g035105		Medtr7g075890	Medtr4g013345	Medtr7g092740
Medtr3g111540	Medtr6g043810	Medtr8g089745		Medtr7g016780	Medtr7g010580	Medtr6g080680
Medtr7g029620	Medtr5g091930	Medtr6g077990		Medtr3g461450	Medtr4g076440	Medtr6g015020
Medtr4g101050	Medtr7g050980	Medtr4g118020		Medtr2g096830	Medtr3g064420	Medtr5g043605
Medtr8g464870	Medtr6g080440	Medtr8g466030		Medtr6g452990	Medtr4g051682	Medtr7g108580
Medtr4g089055	Medtr2g080010	Medtr8g022440		Medtr7g090180	Medtr4g080350	Medtr3g074900
Medtr3g094060	Medtr2g086300	Medtr8g445330		Medtr2g091325	Medtr8g065030	Medtr8g033070
Medtr2g036440	Medtr3g071050	Medtr4g051480		Medtr3g062030	Medtr5g016830	Medtr3g095920
Medtr8g014030	Medtr4g061930	Medtr5g054300		Medtr2g097980	Medtr4g063090	Medtr3g069580
Medtr5g089820	Medtr6g021915	Medtr4g072805		Medtr8g007040	Medtr6g028050	Medtr6g091790
MT4Noble_054159	Medtr7g074870	Medtr5g019130		Medtr4g128990	Medtr2g087230	Medtr4g109520
Medtr3g053770	Medtr8g061360	Medtr7g084620		Medtr2g067420	Medtr4g092550	Medtr7g067450
Medtr1g107165	Medtr5g091390	Medtr5g014960		Medtr2g012870	Medtr7g086300	Medtr8g040925
Medtr8g447300	Medtr3g092150	Medtr3g114260		Medtr8g072210	Medtr2g070730	Medtr7g045290
Medtr1g089920	Medtr2g038380	Medtr4g011030		Medtr1g095085	Medtr2g076970	Medtr8g085780
Medtr3g077410	Medtr5g073020	Medtr8g046210		Medtr1g106060	Medtr1g090930	Medtr8g088740
Medtr4g084630	Medtr6g092940	Medtr4g063040		Medtr5g047050	Medtr6g011870	Medtr7g057770
Medtr4g083080	Medtr1g079525	Medtr1g054285		Medtr7g114990	Medtr2g076990	Medtr3g110068
Medtr2g064370	Medtr4g083440	MT4Noble_019974		Medtr1g115475	Medtr8g096670	Medtr4g105220
Medtr1g049240	Medtr7g063950	MT4Noble_030016		Medtr7g088035	Medtr5g083910	Medtr3g030960
Medtr5g082610	Medtr4g061833	Medtr4g024370		Medtr1g029140	Medtr6g015390	Medtr5g057335
Medtr4g083370	Medtr3g088760	Medtr4g083710		Medtr8g079770	Medtr4g007600	Medtr7g045280
Medtr7g490310	Medtr4g094562	Medtr8g044070		Medtr7g075900	Medtr1g101120	Medtr6g039820
Medtr1g026910	Medtr7g118230	Medtr8g068300		Medtr3g110028	Medtr8g044230	Medtr5g043970
MT4Noble_024178	Medtr3g114460	MT4Noble_030050		Medtr3g005660	Medtr2g461970	Medtr1g013120
Medtr4g113710	MT4Noble_026712	Medtr4g051093		Medtr7g060460	Medtr0635s0010	Medtr1g020080
Medtr5g024100	Medtr4g089025	Medtr8g074210		Medtr7g053580	Medtr5g029370	Medtr1g014210
Medtr7g087190	Medtr6g065550	MT4Noble_012197		Medtr8g037933	Medtr8g007020	Medtr5g029310
Medtr3g008010	Medtr7g110880	Medtr2g098950		Medtr8g009880	Medtr4g015570	Medtr2g081470
Medtr4g106410	Medtr6g091960	Medtr2g008240		Medtr6g084660	Medtr8g087400	Medtr3g068155
Medtr1g055135	Medtr7g113250	Medtr1g025780		Medtr7g070440	Medtr8g072510	Medtr1g105655
Medtr5g074640	Medtr4g091200	Medtr3g095580		Medtr5g091690	Medtr4g013350	Medtr5g071990
Medtr8g097160	Medtr8g076320	Medtr8g070540		Medtr4g109300	Medtr4g128337	Medtr5g094290
Medtr8g009280	Medtr5g464810	Medtr7g071110		Medtr3g097150	Medtr7g089400	Medtr7g086370
Medtr7g089830	Medtr3g089070	Medtr7g096390		Medtr7g070220	Medtr3g045760	Medtr7g075140
Medtr3g074610	Medtr5g021390	Medtr4g022825		Medtr3g113210	Medtr4g086130	Medtr1g115370
Medtr4g106590	Medtr3g056730	Medtr4g108260		Medtr7g079870	Medtr2g014380	Medtr6g015745
Medtr5g097180	Medtr3g108320	Medtr7g082740		Medtr5g021820	Medtr7g090230	Medtr1g050360
Medtr8g099065	Medtr3g101930	Medtr0549s0020		Medtr3g107730	Medtr2g027600	Medtr4g089055
Medtr4g126120	Medtr1g098460	MT4Noble_030207		Medtr8g013680	Medtr3g116080	Medtr4g063925
Medtr6g075930	Medtr1g107155	Medtr1g013580		Medtr2g078610	Medtr3g113970	Medtr3g069120
Medtr3g088605	Medtr7g019160	Medtr1g087740		Medtr7g109130	Medtr8g039950	Medtr8g103900
Medtr3g030250	Medtr5g037710	Medtr1g072420		Medtr4g082590	Medtr5g023730	Medtr5g033960
Medtr5g080580	Medtr2g070410	Medtr2g094930		Medtr3g095910	Medtr7g011010	Medtr6g038750
Medtr5g034980	Medtr5g064240	Medtr7g114700		Medtr1g061540	Medtr2g449840	Medtr0157s0070
Medtr3g033420	Medtr7g109280	MT4Noble_035292		Medtr2g090270	Medtr3g116590	Medtr8g045440
Medtr2g015740	Medtr5g041530	Medtr1g008620		Medtr2g079950	Medtr2g086790	Medtr5g021760
Medtr4g127790	Medtr4g126350	Medtr1g069805		Medtr1g077560	Medtr0079s0070	Medtr3g111850
Medtr8g035760	Medtr4g485550	Medtr2g022350		Medtr2g012900	Medtr4g120270	Medtr3g109620
Medtr3g096200	Medtr2g034360	Medtr4g113620		Medtr1g111120	Medtr4g097480	Medtr4g108870
Medtr3g099200	Medtr3g028460	Medtr1g042800		Medtr7g065160	Medtr5g068910	Medtr5g099370
Medtr3g020970	Medtr8g058520	Medtr1g061540		Medtr2g034810	Medtr1g028090	Medtr2g011070
Medtr1g046510	Medtr2g005130	Medtr2g076460		Medtr0549s0020	Medtr6g090535	Medtr1g018710
Medtr8g093330	Medtr4g102220	Medtr3g467420		Medtr8g092500	Medtr6g088805	Medtr7g063030
Medtr8g093335	Medtr1g492630	Medtr5g010110		Medtr6g033450	Medtr4g063130	Medtr2g078090
Medtr7g055900	Medtr8g015950	Medtr1g104610		Medtr6g016800	Medtr2g090875	Medtr2g066050
Medtr2g031560	Medtr3g086830	Medtr1g044340		Medtr1g114340	Medtr1g102230	Medtr1g052100
Medtr8g077145	Medtr8g103550	Medtr3g108860		Medtr5g010150	Medtr7g105170	Medtr6g047580
Medtr7g082680	Medtr5g096750	MT4Noble_005314		Medtr5g087480	Medtr3g008580	Medtr3g087900
Medtr8g069820	MT4Noble_046916	Medtr5g048570		Medtr3g056160	Medtr6g084250	Medtr7g406870
Medtr7g091550	Medtr2g035210	Medtr2g022380		Medtr8g022380	Medtr4g088030	Medtr4g034030
Medtr8g088880	Medtr4g005960	Medtr1g042820		Medtr8g016160	Medtr0160s0040	Medtr1g055085
Medtr7g113930	Medtr4g011020	Medtr1g093390		Medtr4g133932	Medtr7g007540	Medtr6g445600
Medtr1g106215	Medtr2g084375	Medtr5g012850		Medtr5g081530	Medtr5g017350	Medtr5g087960
Medtr7g089950	Medtr6g012450	Medtr3g096390		Medtr5g075440	Medtr1g025430	Medtr4g093150
Medtr1g066900	Medtr3g051570	Medtr6g084470		Medtr3g088800	Medtr3g083910	Medtr5g082580
Medtr4g057970	Medtr1g013450	Medtr2g086680		Medtr4g131990	Medtr3g075030	Medtr5g006440
Medtr6g018390	Medtr2g045490	Medtr6g082500		Medtr2g094640	Medtr4g007740	MT4Noble_009931
Medtr3g079480	Medtr2g067640	Medtr5g012400		Medtr5g014240	Medtr4g038440	Medtr7g082980
Medtr4g126130	Medtr3g070220	Medtr6g079550		Medtr6g016015	Medtr0684s0020	Medtr3g075220
Medtr5g006570	Medtr4g021520	Medtr1g098760		Medtr8g031420	Medtr1g099050	Medtr4g006550
Medtr1g064630	Medtr2g010590	Medtr2g079440		Medtr7g068550	Medtr4g058015	Medtr4g074870
Medtr5g029470	Medtr3g103180	Medtr5g011390		Medtr1g104630	Medtr0163s0020	Medtr0044s0180
Medtr7g087110	Medtr4g478130	Medtr5g093750		Medtr4g104690	Medtr2g093980	Medtr7g113480
Medtr4g126360	Medtr3g079610	Medtr5g023170		Medtr8g068120	Medtr1g006490	Medtr1g090740
Medtr2g101140	Medtr3g100200	Medtr4g122640		Medtr5g020600	Medtr8g100075	Medtr7g053620
Medtr7g095680	Medtr4g011060	Medtr5g071360		Medtr8g087630	Medtr6g090080	Medtr3g073330
Medtr5g021810	Medtr5g016450	MT4Noble_038353		Medtr1g022275	Medtr6g032990	Medtr3g078110
Medtr5g030900	Medtr3g046650	Medtr2g089930		Medtr4g029630	Medtr8g107370	Medtr4g029710
Medtr7g088330	Medtr1g112780	Medtr3g069570		Medtr1g086950	Medtr5g007760	Medtr6g015695
Medtr8g099560	Medtr0045s0110	Medtr3g069050		Medtr4g078660	Medtr8g014910	Medtr4g132367
MT4Noble_040766	Medtr4g123970	Medtr5g021480		Medtr3g062090	Medtr4g485570	Medtr4g019110
Medtr7g102280	Medtr1g086790	Medtr5g055130		Medtr8g044160	Medtr1g040175	Medtr4g011610
Medtr1g013130	Medtr4g062330	Medtr3g087050		Medtr8g009000	Medtr7g075453	Medtr1g022445
Medtr4g063220	Medtr1g014320	Medtr8g016220		Medtr7g073590	Medtr7g105850	Medtr4g011810
Medtr1g103020	Medtr0400s0030	Medtr5g056480		Medtr2g016680	Medtr6g463390	Medtr7g092170
Medtr8g091930	Medtr7g065150	Medtr1g418545		Medtr4g081390	Medtr3g479460	Medtr2g064405
Medtr3g033150	MT4Noble_055750	Medtr7g102820		Medtr7g112580	Medtr7g059810	Medtr4g099290
Medtr5g079550	Medtr1g055425	Medtr3g079320		Medtr2g041460	Medtr5g020800	Medtr8g028475
Medtr0590s0020	Medtr4g011970	Medtr4g096730		Medtr2g436910	Medtr2g097520	Medtr6g009520
Medtr6g071450	Medtr5g090630	Medtr5g066800		Medtr5g089100	Medtr4g051662	Medtr7g102280
Medtr4g076600	Medtr1g094160	Medtr1g089090		Medtr2g078360	Medtr8g091320	Medtr6g038220
Medtr0308s0020	Medtr2g010520	Medtr3g069290		Medtr2g061690	Medtr8g013610	Medtr7g078800
Medtr5g079715	Medtr6g081060	Medtr3g061030		Medtr3g106740	Medtr5g020760	Medtr5g046030
Medtr8g086560	Medtr7g075610	Medtr7g081120		Medtr3g064610	Medtr8g006260	Medtr7g050860
Medtr5g009740	Medtr3g095620	Medtr5g010150		Medtr1g084120	Medtr5g071010	Medtr1g010020
Medtr7g091390	Medtr1g099310	Medtr2g089955		Medtr1g019270	Medtr3g062540	Medtr8g035590
Medtr1g063350	Medtr8g040080	Medtr8g005880		Medtr2g081110	Medtr5g007730	Medtr2g063080
Medtr7g094760	Medtr4g020670	Medtr3g067565		Medtr3g075450	Medtr7g083060	Medtr7g108955
Medtr8g086060	Medtr4g088400	Medtr8g086270		Medtr5g085340	Medtr5g034200	Medtr2g020860
Medtr1g080810	Medtr3g070090	Medtr4g080790		Medtr2g095730	Medtr3g464370	Medtr5g018550
Medtr4g094932	Medtr1g016120	Medtr4g081390		Medtr4g063885	Medtr4g075760	Medtr4g118470
Medtr7g105450	Medtr0365s0020	Medtr7g034100		Medtr8g039540	MT4Noble_024415	Medtr4g084020
Medtr5g024260	Medtr7g108820	Medtr1g074170		Medtr4g053880	Medtr1g041875	Medtr8g106790
Medtr5g091615	Medtr1g025370	Medtr1g037130		Medtr5g091660	Medtr0372s0010	Medtr8g466800
Medtr5g031390	Medtr7g091280	Medtr8g092290		Medtr4g014070	Medtr6g047570	Medtr4g063560
Medtr3g098280	Medtr7g107100	Medtr1g012390		Medtr8g024560	Medtr5g032660	Medtr1g064430
Medtr2g437020	Medtr3g012060	Medtr4g124520		Medtr3g050500	Medtr0102s0060	Medtr5g017830
Medtr3g019340	Medtr2g015540	Medtr7g086010		Medtr0015s0130	Medtr2g089290	Medtr1g007610
Medtr8g006905	Medtr7g111450	Medtr3g106930		Medtr5g022510	Medtr8g470840	Medtr3g069960
Medtr4g126020	Medtr1g031280	Medtr2g073650		Medtr0095s0120	Medtr6g038940	Medtr1g073200
Medtr4g111975	Medtr3g048300	Medtr1g012700		Medtr8g098435	Medtr4g097700	Medtr3g110360
Medtr3g105050	Medtr7g010950	Medtr7g117405		Medtr2g098250	MT4Noble_012118	Medtr3g014390
Medtr4g019165	Medtr7g114200	Medtr2g011690		MT4Noble_053329	Medtr4g076430	Medtr7g105430
Medtr2g435740	Medtr7g112860	Medtr5g015190		Medtr7g088640	Medtr4g019010	Medtr1g100647
Medtr4g092820	Medtr2g072380	Medtr1g086950		Medtr2g102080	Medtr2g102660	Medtr3g105900
Medtr5g083530	Medtr3g098490	Medtr8g068110		Medtr8g096730	Medtr7g081750	Medtr2g012780
Medtr1g030268	Medtr2g031460	Medtr7g082730		Medtr7g096320	Medtr3g460780	Medtr2g101710
Medtr1g032490	Medtr3g015430	Medtr6g005340		Medtr3g062840	Medtr3g024510	Medtr6g087780
Medtr7g075040	MT4Noble_001140	MT4Noble_033565		Medtr8g006765	Medtr5g026290	Medtr3g092980
Medtr3g005330	Medtr1g067000	Medtr8g095220		Medtr4g093890	Medtr3g013440	Medtr1g090240
Medtr1g055250	Medtr4g134280	Medtr2g105010		Medtr1g096530	Medtr2g008330	Medtr8g007235
Medtr1g070220	Medtr2g100630	Medtr5g023110		Medtr6g027920	Medtr1g077990	Medtr3g435480
Medtr4g095065	Medtr8g028430	Medtr4g086730		Medtr1g033390	Medtr4g415290	Medtr8g089790
Medtr4g076230	Medtr5g036660	Medtr1g006695		Medtr7g015120	Medtr5g067410	Medtr5g068780
Medtr4g052500	Medtr2g069420	Medtr4g120970		Medtr2g074830	MT4Noble_001343	Medtr3g109360
Medtr3g012080	Medtr3g078637	Medtr4g087400		Medtr5g076830	Medtr5g076380	Medtr4g087590
Medtr5g018690	Medtr5g075370	Medtr4g097440		Medtr0549s0010	Medtr5g025250	Medtr2g090650
Medtr5g026500	Medtr2g006440	Medtr5g018280		Medtr0036s0220	Medtr1g073700	Medtr7g105790
Medtr4g091090	Medtr6g015815	Medtr3g095460		Medtr1g075153	Medtr6g068930	Medtr3g113250
Medtr2g098240	Medtr8g101650	Medtr2g056130		Medtr4g104320	Medtr0041s0100	Medtr4g097260
Medtr8g087440	Medtr4g094588	Medtr3g069760		Medtr5g015390	Medtr1g021855	Medtr3g084930
MT4Noble_037292	Medtr4g020110	Medtr4g122670		Medtr3g007660	Medtr1g064090	Medtr8g023490
Medtr3g075540	Medtr5g009460	Medtr6g086340		Medtr5g022770	Medtr3g062500	Medtr4g014700
Medtr1g008380	Medtr7g117415	Medtr2g089925		Medtr4g101660	Medtr2g044880	Medtr8g107670
Medtr3g089940	Medtr4g005360	Medtr8g027345		Medtr1g112150	Medtr4g075750	Medtr3g098820
Medtr7g069430	Medtr3g104880	Medtr4g079810		Medtr8g011340	Medtr4g075730	Medtr5g082420
Medtr5g044990	Medtr8g099665	Medtr2g091250		Medtr7g104720	Medtr1g101130	Medtr4g115970
Medtr5g044260	Medtr8g079120	Medtr8g012620		Medtr4g117520	Medtr4g108330	Medtr4g005070
MT4Noble_015940	Medtr1g036510	Medtr2g079950		Medtr6g007720	Medtr7g014430	Medtr4g083960
Medtr1g097240	Medtr1g083290	Medtr7g020820		Medtr8g445730	Medtr1g025950	Medtr1g110760
Medtr2g083420	Medtr5g034440	Medtr8g076040		Medtr5g085810	Medtr3g027045	Medtr5g078080
Medtr2g461250	Medtr8g009680	Medtr3g106920		Medtr4g083710	Medtr5g040755	Medtr3g114540
Medtr3g023160	Medtr5g083770	Medtr1g092970		Medtr3g107320	Medtr5g012810	Medtr6g034470
Medtr4g098660	Medtr5g071560	Medtr0001s0660		Medtr7g072470	Medtr4g104240	Medtr5g087870
Medtr4g116920	Medtr0105s0110	Medtr4g009920		Medtr3g072160	Medtr6g070900	Medtr4g081220
Medtr8g064990	Medtr1g070390	Medtr2g030480		Medtr6g037610	Medtr2g083250	Medtr8g103030
Medtr8g105140	Medtr3g061570	Medtr4g063470		Medtr1g084170	Medtr1g054205	Medtr6g004020
Medtr6g016445	Medtr6g012765	Medtr6g021860		Medtr2g084390	Medtr7g108600	Medtr2g031610
Medtr3g079680	Medtr6g083780	Medtr4g098870		Medtr3g028740	Medtr6g463400	Medtr3g115870
Medtr3g078800	Medtr5g036410	Medtr4g088160		Medtr5g015020	Medtr4g055520	Medtr8g059015
Medtr5g071550	Medtr7g093030	Medtr6g043880		Medtr8g005800	Medtr1g066850	Medtr4g114620
Medtr2g436470	Medtr1g054990	Medtr4g056470		Medtr4g094238	Medtr4g096830	Medtr4g111710
Medtr5g021220	Medtr3g096750	Medtr1g066390		Medtr8g031070	Medtr0204s0020	Medtr7g063580
Medtr3g108060	Medtr7g014620	Medtr3g077590		Medtr2g049670	Medtr7g071680	Medtr6g011640
Medtr8g075400	Medtr8g039820	Medtr5g043285		Medtr8g010340	Medtr2g105570	Medtr2g032060
Medtr1g069610	Medtr1g070435	Medtr4g027040		Medtr8g066690	Medtr5g098720	Medtr5g038520
Medtr4g057845	Medtr5g040960	Medtr3g117290		Medtr8g097030	Medtr2g059540	Medtr2g013060
Medtr2g096100	Medtr7g015750	Medtr5g090900		Medtr5g076700	Medtr7g021640	Medtr4g089040
Medtr1g088980	Medtr1g013090	Medtr6g045200		Medtr2g049340	Medtr4g072190	Medtr3g088810
Medtr0038s0040	Medtr3g109420	Medtr4g120940		Medtr4g023460	Medtr7g114960	Medtr4g093650
Medtr1g062130	Medtr5g073090	Medtr2g035480		Medtr5g074270	Medtr4g097670	Medtr8g056900
Medtr1g060720	Medtr0405s0060	Medtr8g445540		Medtr4g061650	Medtr6g071400	Medtr2g064450
Medtr1g067600	Medtr5g015230	Medtr1g111510		Medtr7g032660	Medtr4g021875	Medtr8g096310
Medtr2g015530	Medtr4g070370	Medtr5g019680		Medtr3g071890	Medtr1g047370	Medtr2g093130
Medtr4g088915	Medtr1g054750	Medtr7g013820		Medtr8g091290	Medtr4g055310	Medtr7g092260
Medtr5g023680	Medtr7g005930	Medtr0551s0020		Medtr3g456030	Medtr1g084200	Medtr8g027380
Medtr3g063230	Medtr6g005310	Medtr2g020750		Medtr8g028160	Medtr1g086450	Medtr3g072920
Medtr4g127630	Medtr1g115190	Medtr3g088895		Medtr8g069575	Medtr5g012080	Medtr1g030650
Medtr1g030640	Medtr2g023100	Medtr8g045000		Medtr8g074730	Medtr5g069180	Medtr1g038793
Medtr4g028360	Medtr5g019610	Medtr7g029365		Medtr2g437720	Medtr2g090660	Medtr3g010870
Medtr8g093390	Medtr1g073860	Medtr2g438230		Medtr2g023970	Medtr4g415300	Medtr0007s0090
Medtr1g013410	Medtr7g087430	Medtr7g111890		Medtr3g058570	Medtr4g069940	Medtr1g108460
Medtr6g088810	Medtr4g100610	Medtr5g060330		Medtr1g050402	MT4Noble_001747	Medtr3g009050
Medtr5g040490	Medtr5g061740	Medtr4g129760		Medtr4g012540	Medtr4g093660	Medtr2g019670
Medtr4g063865	Medtr1g035190	Medtr7g016700		Medtr2g040000	Medtr3g110205	Medtr5g031390
MT4Noble_028814	Medtr7g109920	Medtr7g072250		Medtr3g117720	Medtr3g101870	Medtr7g096100
Medtr8g103880	Medtr8g099920	Medtr4g073590		Medtr5g085480	Medtr4g006210	Medtr7g062120
MT4Noble_019758	Medtr4g124700	Medtr1g089570		Medtr2g090765	Medtr2g016470	Medtr4g064730
Medtr3g091660	Medtr8g089190	Medtr5g005450		Medtr8g085390	Medtr7g025000	Medtr7g094460
Medtr7g105660	Medtr4g014540	Medtr3g071970		Medtr6g033085	Medtr7g011330	Medtr3g464870
Medtr3g115300	Medtr3g076550	Medtr2g042330		Medtr8g038210	Medtr8g092010	MT4Noble_021855
Medtr1g113760	Medtr5g013130	Medtr3g080020		Medtr7g060310	Medtr3g111990	Medtr3g045450
Medtr4g020470	Medtr1g111480	Medtr3g107100		Medtr5g059200	Medtr3g085210	Medtr4g100760
Medtr0094s0110	Medtr8g018110	Medtr4g046113		Medtr1g104550	Medtr8g064180	Medtr6g040230
Medtr4g068380	Medtr8g022990	Medtr2g039090		Medtr0250s0040	Medtr4g033790	Medtr1g099810
Medtr7g109290	Medtr1g104840	Medtr8g089740		Medtr8g077830	Medtr2g014300	Medtr1g027920
Medtr6g023665	MT4Noble_007280	Medtr5g090410		Medtr1g083260	Medtr4g451275	Medtr4g101070
Medtr2g082880	Medtr5g097220	Medtr1g098300		Medtr3g007770	Medtr3g082260	Medtr2g021220
Medtr8g099975	MT4Noble_017188	Medtr5g043280		Medtr3g062980	Medtr6g075410	Medtr5g026750
Medtr7g079370	Medtr0345s0020	Medtr3g115180		Medtr3g466620	Medtr6g015880	Medtr2g029940
Medtr2g010580	Medtr2g096080	Medtr5g079950		Medtr4g112350	Medtr3g091680	Medtr4g035330
Medtr4g023570	Medtr1155s0010	Medtr7g072575		Medtr6g007770	Medtr0006s0080	Medtr6g075210
Medtr4g025940	Medtr8g078770	Medtr8g008790		Medtr8g013950	Medtr7g093820	Medtr8g077200
Medtr4g025950	Medtr1g113900	Medtr8g028265		Medtr4g107840	Medtr4g084270	Medtr6g042230
Medtr3g073030	Medtr3g069220	Medtr7g016780		Medtr1g109630	Medtr8g042490	Medtr7g113130
Medtr3g013770	Medtr8g035860	Medtr2g102490		Medtr8g091730	Medtr3g058320	Medtr4g071620
Medtr2g040360	Medtr5g024700	Medtr2g081980		Medtr4g105130	Medtr7g117980	Medtr2g049300
Medtr5g033510	Medtr3g118160	Medtr1g012630		Medtr7g018370	Medtr3g456110	Medtr3g081580
Medtr5g004830	Medtr8g093250	Medtr8g103850		Medtr8g005900	Medtr1g028320	MT4Noble_049695
Medtr8g028440	Medtr5g084455	Medtr2g035100		Medtr3g040680	Medtr1g095540	Medtr2g027560
Medtr5g006770	Medtr2g007350	Medtr1g116650		Medtr8g078250	Medtr2g089030	Medtr3g086070
Medtr1g115220	Medtr8g015940	Medtr8g445560		Medtr1g022265	Medtr3g067430	Medtr1g071070
Medtr7g021010	Medtr4g105520	Medtr3g101900		Medtr8g092510	Medtr3g035730	Medtr1g017450
Medtr4g098610	Medtr7g112120	MT4Noble_030497		Medtr7g017100	Medtr8g090205	Medtr4g108400
Medtr5g035170	Medtr2g022940	Medtr2g101370		Medtr5g080720	Medtr3g060900	Medtr6g007737
Medtr3g087325	Medtr8g028525	Medtr0184s0010		Medtr1g051625	Medtr5g060880	Medtr8g098850
MT4Noble_055127	Medtr4g104640	Medtr5g032960		Medtr7g018170	Medtr2g048860	Medtr7g406860
MT4Noble_035377	Medtr7g114520	MT4Noble_006160		Medtr5g005450	Medtr1g008160	Medtr1g022450
Medtr6g009320	MT4Noble_022504	Medtr8g445550		Medtr5g090770	Medtr8g056780	Medtr0147s0070
Medtr3g105375	Medtr7g076620	Medtr2g099630		Medtr3g084310	Medtr3g111880	Medtr5g018940
Medtr6g038760	Medtr8g090145	Medtr7g089250		Medtr5g017510	Medtr2g071760	Medtr4g036260
Medtr3g434790	Medtr2g098540	Medtr7g076797		Medtr2g039890	Medtr1g018200	Medtr0693s0030
Medtr5g070210	Medtr1g019110	Medtr8g027745		Medtr4g087420	Medtr1g116270	Medtr1g049370
Medtr5g014340	Medtr2g042670	Medtr2g089130		Medtr0006s0230	Medtr7g102120	Medtr8g433020
Medtr3g066070	Medtr6g077940	MT4Noble_049812		Medtr6g074855	Medtr4g085590	Medtr5g095470
Medtr5g040900	Medtr1g067170	Medtr1g106590		Medtr4g047800	Medtr2g017970	Medtr7g050870
Medtr8g094790	Medtr2g017865	Medtr8g042780		Medtr8g010180	Medtr5g053250	Medtr4g124360
Medtr1g116580	Medtr2g063560	Medtr6g004440		Medtr4g107360	Medtr8g070700	Medtr6g034890
Medtr4g131380	Medtr5g005370	Medtr5g025800		Medtr7g076520	Medtr6g012520	Medtr4g123690
Medtr2g023680	Medtr7g101180	Medtr5g006300		Medtr4g094908	Medtr1g068970	Medtr0690s0010
Medtr5g092570	Medtr1g100345	Medtr4g091550		Medtr1g107215	Medtr8g085900	Medtr4g008310
Medtr3g452940	Medtr5g012840	Medtr2g034890		Medtr8g072610	Medtr5g084750	MT4Noble_054306
Medtr2g009480	Medtr7g059080	Medtr4g106860		Medtr3g081090	Medtr6g084270	Medtr1g084570
Medtr5g073840	Medtr2g022490	Medtr6g034030		Medtr3g062230	Medtr4g078810	Medtr5g016810
Medtr6g018680	Medtr2g036650	Medtr4g113600		Medtr1g086510	Medtr2g095750	Medtr8g069805
Medtr5g459550	Medtr4g063720	Medtr2g012850		Medtr4g056600	Medtr7g071760	Medtr5g096460
MT4Noble_014721	Medtr4g072340	Medtr6g090070		Medtr1g069305	Medtr3g065440	Medtr4g105630
Medtr3g062790	Medtr5g013080	Medtr3g080370		Medtr0368s0010	Medtr3g055830	Medtr7g117950
Medtr2g103795	Medtr3g466790	Medtr2g046620		Medtr5g022030	Medtr4g019750	Medtr4g130730
Medtr4g033330	Medtr5g073180	Medtr2g101120		Medtr5g090570	Medtr4g049640	Medtr5g018900
Medtr6g007095	Medtr4g130320	Medtr7g068850		MT4Noble_055187	Medtr6g023760	Medtr6g022860
Medtr7g052120	Medtr3g020780	Medtr3g116920		Medtr0137s0080	Medtr4g091100	Medtr5g087410
Medtr3g033620	Medtr1g096460	Medtr4g128220		Medtr3g105550	Medtr1g109320	Medtr5g072860
Medtr7g080090	Medtr0017s0200	Medtr4g094918		Medtr6g472230	Medtr7g085200	Medtr4g067040
Medtr4g094625	Medtr6g008055	Medtr3g052330		Medtr7g028710	Medtr7g113860	Medtr8g465340
Medtr2g072010	Medtr4g088405	Medtr3g105540		Medtr1g084160	Medtr2g075480	Medtr6g034375
Medtr5g079710	Medtr8g015680	Medtr5g066730		Medtr5g009830	Medtr2g026920	Medtr4g101830
Medtr3g062770	Medtr1g043810	Medtr2g449880		Medtr1g042820	Medtr5g035010	Medtr2g072620
Medtr7g015300	Medtr7g076840	Medtr4g036620		Medtr0140s0030	Medtr6g012110	Medtr1g082650
Medtr1g073600	Medtr4g080330	Medtr1g022190		Medtr8g020530	Medtr6g045553	Medtr1g098360
Medtr3g012070	Medtr7g053110	Medtr1g085070		Medtr1g054935	Medtr6g086115	Medtr3g078320
Medtr2g089000	Medtr6g072030	Medtr2g089120		Medtr5g081160	Medtr2g005910	Medtr8g031650
Medtr7g059010	Medtr1g066710	Medtr7g046380		Medtr6g478030	Medtr3g060220	Medtr1g106755
Medtr3g005220	Medtr2g019630	Medtr3g096840		Medtr5g073590	Medtr4g124800	Medtr6g075950
Medtr7g074850	Medtr0103s0090	Medtr6g021900		Medtr3g099777	MT4Noble_036094	Medtr8g465150
Medtr8g041620	MT4Noble_005414	Medtr2g091190		Medtr1g022415	Medtr8g107360	Medtr8g093800
Medtr1g058050	Medtr8g099495	Medtr8g022380		Medtr4g094918	Medtr3g064190	Medtr1g016450
Medtr8g063190	Medtr1g026070	Medtr0011s0320		Medtr4g080160	Medtr5g006370	Medtr1g054965
Medtr4g019770	Medtr1g052065	Medtr1g064260		Medtr1g071260	Medtr2g029815	Medtr3g011770
Medtr7g088825	Medtr0009s0500	MT4Noble_036019		Medtr1g021610	Medtr5g083980	Medtr3g109380
Medtr4g006090	MT4Noble_011897	Medtr7g079110		Medtr7g101870	Medtr6g004880	Medtr8g100120
Medtr8g092080	Medtr4g081350	Medtr4g007250		Medtr8g095090	Medtr7g118170	Medtr5g014290
Medtr7g069440	Medtr6g092770	MT4Noble_037561		Medtr7g095710	Medtr2g090265	Medtr2g011420
Medtr5g012790	MT4Noble_021153	Medtr7g024770		Medtr2g039090	Medtr1g086430	Medtr3g027870
Medtr5g044120	Medtr1g116970	Medtr4g116790		Medtr4g012460	Medtr7g093850	Medtr4g075500
Medtr2g010810	Medtr7g074150	MT4Noble_030189		Medtr5g011580	Medtr1g063280	Medtr8g027975
MT4Noble_005530	Medtr4g131910	Medtr0549s0010		Medtr1g069300	Medtr1g022500	Medtr4g104470
Medtr1g048990	Medtr2g014720	Medtr1g113960		Medtr2g079990	Medtr3g007970	Medtr4g094598
Medtr6g038420	Medtr5g009970	Medtr8g036075		Medtr2g100560	Medtr2g009720	Medtr8g092050
Medtr7g022840	Medtr4g029340	MT4Noble_005413		Medtr6g021900	Medtr7g099850	Medtr3g108280
Medtr4g034810	Medtr5g081620	Medtr1g083440		Medtr3g073370	Medtr4g008010	Medtr7g022390
Medtr1g087760	Medtr1g034190	Medtr1g032380		Medtr8g080470	Medtr5g016250	Medtr3g086040
Medtr8g016010	Medtr4g015460	Medtr0221s0030		Medtr6g472300	Medtr7g417750	Medtr1g084230
Medtr1g085560	Medtr5g024973	Medtr8g469140		Medtr2g086890	Medtr5g086540	Medtr2g076350
Medtr7g017525	Medtr2g033490	Medtr8g010320		Medtr3g075390	MT4Noble_028619	Medtr7g076310
Medtr0891s0010	Medtr2g445370	Medtr0562s0020		Medtr7g117890	Medtr5g017210	Medtr7g101120
Medtr7g068580	Medtr1g087510	Medtr2g033650		Medtr1g095165	Medtr7g010710	Medtr7g114070
Medtr7g117505	Medtr2g025120	Medtr2g036380		Medtr0015s0140	Medtr4g060580	Medtr4g062190
Medtr5g017890	Medtr1g111970	MT4Noble_008777		Medtr8g046260	Medtr3g102670	Medtr3g093110
Medtr1g098580	Medtr8g071280	Medtr8g007420		Medtr4g093830	Medtr1g033130	Medtr7g085640
Medtr1g017390	Medtr2g449830	Medtr8g469090		Medtr4g123870	Medtr4g104350	Medtr3g069410
Medtr1g017530	Medtr1g078050	Medtr7g096370		Medtr5g005170	Medtr5g009660	Medtr3g092790
Medtr6g043180	Medtr4g105450	Medtr7g090470		Medtr7g080920	Medtr8g018747	Medtr0227s0020
Medtr4g119990	Medtr8g011320	Medtr3g065140		Medtr3g082440	Medtr2g097950	Medtr1g090913
Medtr4g078600	Medtr8g032710	Medtr2g017610		Medtr8g022440	Medtr4g109140	Medtr7g097060
Medtr6g039440	Medtr4g089030	Medtr5g090920		Medtr2g075140	Medtr4g063975	Medtr7g111690
Medtr3g075320	Medtr7g074810	MT4Noble_025172		Medtr4g109040	Medtr1g010270	Medtr6g008900
Medtr2g063570	Medtr5g071380	Medtr3g101780		Medtr4g091220	Medtr3g107610	Medtr2g020830
Medtr4g023520	Medtr4g129780	Medtr5g055680		Medtr8g089740	Medtr1g088925	Medtr3g101560
Medtr8g066700	Medtr3g099460	Medtr8g083450		Medtr3g086540	Medtr1g034270	Medtr8g063940
Medtr8g471150	Medtr7g013240	Medtr2g039120		Medtr1g052530	Medtr7g092780	Medtr6g015795
Medtr0316s0010	Medtr4g127660	Medtr5g075440		Medtr8g023310	Medtr1g087270	Medtr4g082470
Medtr4g077475	Medtr7g007490	Medtr5g088270		Medtr5g025640	Medtr6g084260	Medtr3g098170
Medtr7g006690	MT4Noble_014457	Medtr3g466480		Medtr7g014570	Medtr8g086460	Medtr3g099757
Medtr4g074950	Medtr4g133938	Medtr1g112300		Medtr8g104200	Medtr1g050385	Medtr4g094572
Medtr4g035590	Medtr7g080620	Medtr4g067280		Medtr4g100950	Medtr3g091380	Medtr3g073620
Medtr8g098250	Medtr7g106770	Medtr1g032040		Medtr2g461190	Medtr8g104990	Medtr8g030690
MT4Noble_030540	Medtr5g092860	Medtr5g007640		Medtr5g079910	Medtr1g033100	Medtr3g098230
Medtr6g051950	Medtr3g008470	Medtr7g050415		Medtr5g067460	Medtr5g083970	Medtr2g007790
Medtr1g067330	Medtr4g111935	Medtr1g023260		Medtr2g101130	Medtr7g033755	Medtr1g054310
Medtr2g073080	Medtr8g080660	Medtr2g013980		Medtr6g011080	Medtr1g038260	Medtr8g089805
Medtr4g025970	Medtr3g094190	Medtr7g069785		Medtr4g023400	Medtr1g093900	Medtr3g083180
Medtr6g463360	Medtr2g081000	Medtr2g039890		Medtr5g062310	Medtr7g103440	Medtr0662s0030
Medtr1g112020	Medtr7g029520	Medtr3g005295		Medtr2g037930	Medtr2g100880	Medtr1g107450
Medtr4g050863	Medtr2g014740	Medtr4g100880		Medtr2g098830	Medtr2g082650	Medtr1g015830
Medtr3g462410	Medtr7g011030	Medtr8g037270		Medtr3g081530	Medtr7g089090	Medtr4g134680
Medtr7g062140	Medtr2g022770	Medtr4g072370		Medtr6g088665	Medtr2g100620	Medtr4g127370
Medtr2g087110	Medtr8g015450	MT4Noble_009591		Medtr2g011270	Medtr8g081040	Medtr5g034980
Medtr1g040925	Medtr2g007210	Medtr2g035220		MT4Noble_041657	Medtr7g010650	Medtr3g034300
Medtr8g032690	Medtr2g451350	Medtr1g029540		Medtr5g084570	Medtr4g075333	Medtr8g072560
Medtr2g044920	Medtr4g076610	Medtr4g018750		Medtr6g091690	Medtr2g088770	Medtr3g088160
Medtr7g017280	Medtr3g093730	Medtr7g085850		Medtr5g097270	Medtr4g005750	Medtr0024s0260
Medtr2g438010	Medtr8g011170	Medtr0184s0040		Medtr3g022930	Medtr8g064560	Medtr3g091800
Medtr4g076660	Medtr1g071920	Medtr3g032980		Medtr4g076810	Medtr6g015785	Medtr3g460700
Medtr5g024910	Medtr2g093760	Medtr2g031530		Medtr4g120940	Medtr4g065073	Medtr1g070520
Medtr1g021740	Medtr4g127770	Medtr8g007075		Medtr5g017560	Medtr0565s0010	Medtr8g105110
Medtr8g028380	Medtr3g096860	Medtr2g059350		Medtr5g078300	Medtr7g065600	Medtr4g088555
Medtr2g097030	Medtr4g107720	Medtr6g016375		Medtr4g019130	Medtr1g077000	Medtr7g090020
Medtr5g041700	Medtr7g099280	Medtr2g081930		Medtr2g017740	Medtr4g097640	Medtr7g087030
Medtr5g011450	MT4Noble_011901	Medtr3g108910		Medtr4g050960	Medtr4g081950	Medtr4g106940
Medtr3g083820	Medtr3g087390	Medtr4g013730		Medtr4g104530	Medtr3g099480	Medtr1g112920
Medtr5g074620	Medtr3g064080	Medtr5g084570		Medtr8g079400	Medtr3g113720	Medtr5g041700
Medtr3g110640	Medtr4g083990	Medtr8g005750		Medtr4g082060	Medtr1g052125	Medtr1g086870
Medtr4g068280	Medtr5g025170	MT4Noble_008800		Medtr4g133968	Medtr7g062310	Medtr2g095130
Medtr0991s0010	Medtr5g017980	Medtr0058s0010		Medtr3g026820	Medtr5g021190	Medtr1g030010
Medtr6g033500	Medtr2g062220	Medtr4g101630		Medtr7g090680	MT4Noble_032107	MT4Noble_028724
Medtr4g090440	Medtr1g026035	Medtr7g096930		Medtr1g077030	Medtr4g078413	Medtr3g088870
Medtr2g018105	Medtr4g105500	MT4Noble_029011		Medtr4g123880	Medtr1g026410	Medtr3g073780
Medtr3g115990	Medtr4g054960	Medtr5g032090		Medtr7g113080	Medtr1g050445	Medtr5g070310
Medtr3g094040	Medtr7g009780	Medtr8g066240		Medtr8g023060	Medtr5g065010	Medtr4g094265
Medtr2g031730	Medtr2g103750	Medtr5g022210		Medtr4g097600	Medtr5g098060	Medtr5g036310
Medtr4g020530	Medtr2g032550	Medtr3g082440		Medtr3g070860	Medtr6g445110	Medtr1g099320
Medtr2g068800	Medtr1g098250	Medtr8g090375		Medtr3g015100	Medtr2g022430	Medtr5g011500
Medtr3g035700	Medtr5g430730	MT4Noble_031927		Medtr1g063100	Medtr8g007300	Medtr2g006210
Medtr4g133740	Medtr3g005520	Medtr2g089210		Medtr4g068110	Medtr7g094940	Medtr7g113960
Medtr3g062920	Medtr4g011960	Medtr7g076190		Medtr2g009270	Medtr5g030340	Medtr4g094595
Medtr4g008180	Medtr5g056720	Medtr7g015150		Medtr4g046113	Medtr3g089035	Medtr5g045310
Medtr4g104030	Medtr7g115600	Medtr4g090580		Medtr7g115080	Medtr4g104370	Medtr1g090130
Medtr5g019030	Medtr5g077100	Medtr3g104560		Medtr1g032140	Medtr5g034840	Medtr4g016930
Medtr4g107620	Medtr5g045620	Medtr7g086660		Medtr2g438260	Medtr1g050448	Medtr0007s0060
Medtr0105s0070	Medtr6g078890	Medtr3g436860		Medtr7g064050	Medtr7g109830	Medtr5g093000
Medtr2g099910	Medtr6g023770	Medtr7g079020		Medtr8g464400	Medtr4g094518	Medtr5g082830
Medtr3g013430	Medtr1g070440	Medtr6g084640		Medtr1g062590	Medtr1g033080	Medtr3g085740
Medtr3g073140	Medtr8g102520	Medtr4g094560		Medtr4g082340	Medtr4g122180	Medtr7g094010
Medtr2g014430	Medtr1g022395	Medtr2g013140		Medtr4g013235	Medtr3g064900	Medtr1g031580
Medtr2g026635	Medtr1g079810	Medtr1g043700		Medtr7g115120	Medtr1g101830	Medtr3g031380
Medtr8g107710	Medtr1g103810	Medtr4g086750		Medtr4g123990	Medtr4g014440	Medtr8g105290
Medtr3g106420	Medtr3g101430	Medtr5g006400		Medtr4g094705	Medtr4g101680	Medtr7g115470
Medtr8g099720	Medtr2g090370	Medtr3g114910		Medtr8g468030	Medtr4g132230	Medtr5g065490
Medtr8g103220	Medtr8g023100	Medtr8g032850		Medtr7g106830	Medtr0078s0010	MT4Noble_005279
Medtr6g465530	Medtr8g103265	Medtr2g438260		Medtr6g039180	Medtr7g073550	Medtr8g023760
Medtr6g048300	MT4Noble_002002	Medtr1g096140		Medtr1g112660	Medtr6g034350	Medtr6g093010
Medtr8g090185	Medtr7g034535	Medtr3g090530		Medtr2g029860	Medtr2g026930	Medtr4g011570
Medtr8g014580	Medtr6g079830	MT4Noble_039487		Medtr5g015690	Medtr4g013325	Medtr7g113920
Medtr2g437240	Medtr3g088555	Medtr3g109120		Medtr5g022270	Medtr5g010020	Medtr1g085090
Medtr8g028375	Medtr8g068550	Medtr3g086580		Medtr5g025690	Medtr4g045887	Medtr7g066240
Medtr4g019900	Medtr2g086510	Medtr2g017570		Medtr3g109280	Medtr3g031650	Medtr6g027160
Medtr8g028145	Medtr4g064180	Medtr6g016135		Medtr4g071120	Medtr4g053785	Medtr1g063080
Medtr4g094365	Medtr4g021725	Medtr1g046200		Medtr8g027160	Medtr1g034360	Medtr2g098500
Medtr1g076310	Medtr6g021950	Medtr5g078330		Medtr3g068125	Medtr5g084790	Medtr4g057210
Medtr4g092620	Medtr6g023610	Medtr3g111610		Medtr8g467220	Medtr2g078210	Medtr7g094520
Medtr8g088160	Medtr4g083660	Medtr4g131990		Medtr8g095080	Medtr2g081090	Medtr8g099865
Medtr0054s0140	Medtr1g107405	Medtr4g099180		Medtr4g083610	Medtr5g020540	Medtr7g118330
Medtr3g061430	Medtr4g023730	Medtr2g008960		Medtr8g063790	Medtr8g069925	Medtr0172s0030
Medtr8g007375	Medtr1g107390	Medtr7g104270		Medtr3g082750	Medtr5g096310	Medtr7g077120
Medtr2g026645	Medtr7g102890	Medtr3g450760		Medtr4g132540	Medtr3g085440	Medtr8g089880
Medtr2g435650	Medtr1g107410	Medtr5g007980		Medtr5g056480	Medtr2g079900	Medtr1g066990
Medtr3g106850	Medtr1g054360	Medtr1g101500		Medtr2g021690	Medtr3g085270	Medtr1g077550
Medtr2g076340	Medtr3g073950	Medtr5g042990		Medtr8g099320	Medtr4g013335	Medtr2g078060
Medtr5g072510	Medtr6g018900	Medtr1g111540		Medtr4g011450	Medtr8g063270	Medtr8g087310
Medtr0252s0060	Medtr1g023570	Medtr6g085070		Medtr8g103850	Medtr6g016790	Medtr4g125470
Medtr1g094190	Medtr2g094040	Medtr0903s0010		Medtr1g052885	MT4Noble_024486	Medtr1g096490
Medtr5g012050	Medtr1g106050	Medtr7g014160		Medtr3g072870	Medtr5g084330	Medtr2g042700
Medtr6g034205	Medtr5g090290	Medtr1g097580		Medtr2g087080	Medtr1g107360	Medtr8g446850
Medtr1g102860	Medtr2g008580	Medtr0078s0190		Medtr5g007713	Medtr5g064990	Medtr5g058140
Medtr4g020090	Medtr2g060350	Medtr7g085310		Medtr8g079482	Medtr2g034680	Medtr4g095410
Medtr5g017160	Medtr4g089110	Medtr6g072023		Medtr5g099130	Medtr8g005270	MT4Noble_016374
Medtr1g026100	Medtr1088s0010	Medtr8g018980		Medtr3g448380	Medtr2g100900	Medtr2g025140
Medtr0189s0010	Medtr3g101635	Medtr8g031400		Medtr5g065580	Medtr8g006550	Medtr2g015790
Medtr4g112370	Medtr7g086990	Medtr3g111740		Medtr6g015775	MT4Noble_027650	Medtr8g080210
Medtr7g055710	Medtr3g073150	Medtr4g073810		Medtr4g113600	Medtr7g114490	Medtr4g094592
Medtr8g076220	Medtr1g028290	Medtr5g088760		Medtr8g038730	Medtr3g092890	Medtr4g080100
Medtr5g040920	Medtr7g111830	Medtr7g088410		Medtr4g120970	Medtr3g067535	Medtr1g085620
Medtr7g019140	Medtr2g011400	Medtr5g034590		Medtr0036s0250	Medtr2g007990	Medtr3g104550
Medtr1g095920	Medtr1308s0010	Medtr8g107030		Medtr2g008220	Medtr2g089100	Medtr1g040875
Medtr5g019780	Medtr4g029200	Medtr7g016720		Medtr0039s0080	Medtr6g017240	Medtr1g017880
Medtr8g033390	Medtr1g021590	Medtr4g044297		Medtr3g035600	Medtr5g097280	Medtr8g102660
Medtr8g465340	Medtr2g075940	Medtr4g086600		Medtr4g058740	Medtr6g011880	Medtr4g011310
Medtr1g115295	MT4Noble_053042	Medtr5g018570		Medtr5g010650	Medtr4g095280	Medtr2g069310
Medtr5g004970	Medtr4g124750	Medtr4g101780		Medtr4g051370	Medtr1g088920	Medtr7g097200
Medtr4g021057	Medtr7g111280	Medtr5g037070		Medtr3g110180	Medtr8g463140	Medtr7g092100
Medtr4g047920	Medtr1g021730	Medtr4g011660		Medtr4g078840	Medtr7g065740	Medtr7g099940
Medtr8g077125	Medtr4g089155	Medtr5g044250		Medtr6g061930	Medtr4g081100	Medtr1g092860
Medtr2g101380	Medtr7g063960	Medtr6g452990		Medtr5g037270	Medtr4g109020	Medtr8g046140
Medtr8g054450	Medtr3g030540	Medtr8g461270		Medtr6g087670	Medtr5g098420	Medtr5g019900
Medtr1g110750	Medtr4g123040	Medtr5g085800		Medtr8g007450	Medtr8g018750	Medtr8g106950
Medtr7g078800	Medtr5g062890	Medtr8g008820		Medtr1g088680	Medtr1g052120	Medtr3g101420
MT4Noble_022590	Medtr4g026070	Medtr4g072890		Medtr4g117250	Medtr1g075310	Medtr2g086950
Medtr2g033020	Medtr2g005210	Medtr1g019760		Medtr5g062290	Medtr4g088735	Medtr4g108350
Medtr3g084200	MT4Noble_052006	Medtr2g461190		Medtr3g057800	Medtr3g107360	Medtr3g040400
Medtr2g036430	Medtr4g032845	Medtr8g014790		Medtr7g085220	Medtr7g014880	Medtr2g045070
Medtr5g088880	Medtr7g098740	Medtr2g070870		Medtr4g053330	Medtr2g099520	Medtr1g069385
Medtr4g008160	Medtr4g066210	Medtr8g104765		Medtr7g093260	Medtr7g057170	Medtr8g104140
Medtr3g114680	Medtr4g132010	Medtr8g086260		Medtr4g087410	Medtr8g075150	Medtr4g064160
Medtr5g021250	Medtr6g023910	Medtr7g109390		Medtr5g084680	Medtr5g022870	Medtr7g095680
Medtr1g018910	Medtr7g407010	Medtr8g071160		Medtr8g086390	Medtr5g083260	Medtr6g078300
Medtr2g069680	Medtr1372s0010	Medtr4g023490		Medtr4g118720	Medtr8g081480	Medtr5g096430
Medtr3g019320	Medtr8g093620	Medtr1g070830		Medtr6g008210	Medtr4g130400	Medtr4g005280
Medtr4g015010	Medtr2g025760	Medtr3g031000		Medtr7g117170	Medtr3g064800	Medtr4g068880
Medtr1g026340	Medtr3g088565	Medtr7g069410		Medtr3g037110	Medtr3g087950	Medtr2g086420
MT4Noble_001223	Medtr5g062850	Medtr5g008210		Medtr1g034320	Medtr1g075180	Medtr8g043450
Medtr2g101770	Medtr2g089835	Medtr1g013150		Medtr1g033310	Medtr8g005670	Medtr5g083790
Medtr5g009810	MT4Noble_030921	Medtr2g083210		Medtr3g072530	Medtr6g028070	Medtr1g015930
Medtr1g016210	Medtr3g045840	Medtr7g098820		Medtr3g098390	Medtr4g045667	MT4Noble_057383
Medtr4g115070	Medtr3g080810	Medtr7g091370		Medtr7g058510	Medtr5g029320	Medtr3g088220
Medtr4g012810	MT4Noble_035956	Medtr4g103550		Medtr1g090150	Medtr5g011010	Medtr1g069165
Medtr4g095700	Medtr5g018250	Medtr5g027970		Medtr1g088230	Medtr8g045665	Medtr8g074130
Medtr3g093430	Medtr4g036400	Medtr8g102350		Medtr1g100733	Medtr0050s0010	Medtr3g112130
Medtr7g093900	Medtr6g086670	Medtr1g029600		Medtr3g095730	Medtr7g033230	Medtr1g107555
Medtr3g047930	Medtr2g021050	Medtr1g088470		Medtr5g022210	Medtr6g014240	Medtr7g092050
Medtr4g094832	MT4Noble_022321	Medtr8g027160		Medtr0277s0010	Medtr0002s1060	Medtr1g492880
Medtr3g118290	Medtr3g090940	Medtr3g116320		Medtr5g006560	Medtr1g105305	Medtr3g463450
Medtr1g032560	Medtr8g018370	Medtr1g077790		Medtr5g011050	Medtr5g006040	Medtr6g006970
Medtr0373s0040	Medtr3g026290	Medtr6g092620		Medtr8g090235	Medtr7g073620	Medtr4g105590
Medtr5g098800	Medtr2g012290	Medtr1g027680		Medtr6g478000	Medtr8g018430	Medtr5g034090
Medtr4g105460	Medtr1g060360	Medtr3g104660		Medtr8g041400	Medtr8g045640	Medtr8g030700
Medtr2g437260	Medtr4g105250	Medtr5g006070		Medtr1g084820	Medtr1g013760	Medtr1g105430
Medtr3g005450	Medtr3g085020	Medtr5g012270		Medtr7g015770	Medtr2g079850	Medtr1g084720
MT4Noble_028678	Medtr1g019240	Medtr4g052000		Medtr8g074330	Medtr6g012080	Medtr7g090310
Medtr2g095060	Medtr8g018570	Medtr4g113790		Medtr7g074010	Medtr2g041260	Medtr1g069390
Medtr2g020160	Medtr5g062900	Medtr3g095660		Medtr4g079110	Medtr4g129580	Medtr4g132840
Medtr4g051130	Medtr8g067690	Medtr8g041910		Medtr4g073530	Medtr4g478140	Medtr2g060910
Medtr8g030690	Medtr5g064510	Medtr5g007760		Medtr7g095450	Medtr3g099580	MT4Noble_017999
Medtr5g005200	Medtr2g023710	Medtr6g061940		Medtr4g102120	Medtr1g075170	Medtr4g114060
Medtr6g007887	Medtr6g034905	Medtr5g015090		Medtr4g100380	Medtr0122s0020	Medtr4g118480
Medtr3g015950	Medtr1g077480	Medtr1g069345		Medtr3g113630	Medtr1g012710	Medtr2g096940
Medtr6g048050	Medtr3g465440	Medtr5g018720		Medtr4g078710	Medtr3g465470	Medtr7g080020
Medtr4g105140	Medtr8g432440	Medtr1g114750		Medtr3g118020	Medtr4g102900	Medtr5g024130
Medtr5g057990	MT4Noble_022311	Medtr3g088570		Medtr1g067320	Medtr7g117375	Medtr1g083960
Medtr3g095920	Medtr3g058720	Medtr5g029230		Medtr5g032720	Medtr8g009560	Medtr8g088300
Medtr4g057210	Medtr5g041010	MT4Noble_000986		Medtr5g094830	Medtr1g087240	Medtr5g093570
Medtr0493s0010	Medtr2g089620	Medtr8g077310		Medtr1g015650	Medtr4g121590	Medtr7g094110
Medtr4g011040	Medtr1g020090	Medtr7g106150		Medtr1g022005	Medtr4g094858	Medtr8g031990
Medtr7g095340	Medtr4g025670	Medtr8g036220		Medtr2g025710	Medtr7g070060	Medtr4g104800
Medtr7g111880	Medtr6g004740	Medtr6g027690		Medtr6g016160	Medtr8g066770	Medtr8g061130
Medtr4g079780	Medtr7g109350	Medtr4g101025		Medtr7g020950	Medtr2g089140	Medtr5g016660
Medtr8g044030	Medtr7g116260	Medtr7g116580		Medtr5g090095	Medtr4g070590	Medtr4g132980
Medtr4g064770	Medtr5g025010	Medtr2g034470		Medtr1g078290	Medtr8g089660	Medtr5g036600
Medtr4g022720	Medtr4g072360	Medtr2g098590		Medtr0052s0140	Medtr1g085500	Medtr1g032500
Medtr6g013150	Medtr5g071170	Medtr2g055760		Medtr0184s0010	MT4Noble_010289	Medtr7g012950
Medtr5g094120	Medtr2g024010	MT4Noble_037237		Medtr6g084710	Medtr6g004630	Medtr3g074490
Medtr0021s0140	Medtr3g111790	Medtr1g007860		Medtr4g076030	Medtr2g018860	Medtr0316s0010
Medtr5g030870	Medtr5g090280	Medtr7g076170		Medtr4g133440	Medtr6g009480	Medtr5g096150
Medtr4g130300	Medtr5g016320	Medtr5g009160		Medtr7g115070	Medtr2g436310	Medtr7g114260
Medtr4g088615	Medtr7g063320	Medtr2g012600		Medtr4g127580	Medtr8g014650	Medtr7g092230
Medtr1g082670	Medtr3g080870	Medtr4g063410		Medtr5g010800	Medtr7g458880	Medtr4g098650
Medtr8g009050	Medtr6g048440	Medtr7g109460		Medtr7g016700	Medtr7g079310	Medtr8g086070
Medtr1g064235	Medtr4g084480	MT4Noble_053305		MT4Noble_013151	Medtr1g087230	Medtr4g078770
Medtr4g114180	Medtr1g107395	Medtr6g082280		Medtr7g058640	Medtr7g068920	Medtr4g108140
Medtr5g099030	Medtr3g092490	Medtr4g050700		Medtr3g015560	Medtr3g033530	Medtr0223s0010
Medtr7g076280	Medtr8g432420	Medtr5g008020		Medtr1g008675	Medtr4g058860	Medtr4g078640
Medtr2g062700	Medtr8g078240	Medtr3g080000		Medtr1g018610	Medtr1g019540	Medtr2g083390
Medtr7g012240	Medtr8g037800	MT4Noble_013151		MT4Noble_029746	Medtr1g037630	Medtr7g099410
Medtr4g124790	Medtr4g080700	Medtr3g068035		Medtr4g123110	Medtr4g094895	Medtr8g098755
Medtr2g031740	MT4Noble_021608	Medtr2g012410		Medtr5g035670	Medtr7g116420	Medtr4g007190
Medtr5g096020	Medtr3g467220	Medtr2g086440		Medtr2g023910	Medtr1g011470	Medtr6g488200
Medtr4g133040	Medtr4g094412	Medtr2g056120		Medtr2g031520	Medtr4g078875	Medtr4g035200
Medtr3g118070	Medtr5g021110	Medtr6g038200		Medtr4g014120	Medtr8g076820	Medtr3g014380
Medtr4g101245	Medtr3g065950	Medtr8g099420		Medtr4g011030	Medtr5g032750	Medtr2g097850
Medtr4g081610	Medtr5g030910	Medtr2g437370		Medtr5g025020	Medtr5g064890	Medtr2g017980
Medtr5g035330	Medtr7g027175	Medtr4g019130		Medtr4g051290	Medtr7g065210	Medtr6g023990
Medtr7g027020	Medtr3g098910	Medtr5g007713		Medtr7g076900	Medtr6g093180	Medtr5g053450
Medtr6g079920	Medtr3g088460	Medtr7g111060		Medtr1g018320	Medtr3g005710	Medtr4g126170
Medtr3g084230	Medtr1g102510	Medtr7g051240		MT4Noble_037169	Medtr2g062280	Medtr1g014080
Medtr5g082340	Medtr2g024050	Medtr5g017110		Medtr4g128020	Medtr3g014290	Medtr2g066120
Medtr7g021930	Medtr1g071720	Medtr1g097935		Medtr8g089820	Medtr5g004980	Medtr2g009275
Medtr1g041320	Medtr5g040940	Medtr4g088900		Medtr3g099520	Medtr6g011890	Medtr5g034290
Medtr4g019340	Medtr4g093910	Medtr2g022430		Medtr8g094940	Medtr1g106860	Medtr3g031280
Medtr1g032100	Medtr6g069140	Medtr4g023770		Medtr7g085850	Medtr3g027940	Medtr3g109070
Medtr7g105830	Medtr7g104330	Medtr1g073740		Medtr2g080950	Medtr5g041340	Medtr1g031590
Medtr1g042730	Medtr7g111020	Medtr1g108700		Medtr4g072020	Medtr8g005750	Medtr6g034205
Medtr6g014050	Medtr7g010820	Medtr8g487700		Medtr4g133230	Medtr0009s0230	Medtr3g063200
Medtr8g070680	Medtr5g006430	Medtr1g046650		Medtr1g105360	Medtr2g035780	Medtr2g010200
Medtr1g079870	Medtr1g073780	Medtr1g094130		Medtr4g052300	Medtr4g102380	Medtr3g082050
Medtr1g069385	Medtr2g102030	Medtr3g037730		Medtr2g090755	Medtr2g093990	Medtr4g059450
Medtr3g045450	Medtr5g088767	Medtr6g033450		Medtr8g020880	Medtr3g462760	Medtr1g101790
Medtr4g092510	Medtr1g032250	Medtr7g113110		Medtr3g118390	Medtr1g085980	Medtr8g073120
Medtr6g068870	MT4Noble_022322	Medtr6g034310		Medtr8g086050	Medtr7g103040	Medtr5g073650
Medtr4g093150	Medtr1g075410	Medtr5g032720		Medtr0113s0040	Medtr8g066850	Medtr7g074070
Medtr8g064610	Medtr5g067740	Medtr2g091260		Medtr1g073180	Medtr8g081600	Medtr8g094730
Medtr7g091520	MT4Noble_022320	Medtr6g011370		Medtr4g019690	Medtr4g059720	Medtr7g109850
Medtr2g010200	Medtr1g102220	Medtr5g069980		Medtr2g015080	Medtr4g015120	Medtr3g048950
Medtr3g117600	Medtr6g082420	Medtr1g032340		Medtr6g006910	Medtr8g096580	Medtr7g074650
Medtr3g006290	Medtr7g053200	Medtr7g101270		Medtr1g442740	Medtr8g066710	Medtr5g011840
Medtr3g099470	Medtr6g027570	Medtr7g113410		Medtr1g080320	Medtr0002s0900	Medtr2g035850
Medtr2g088100	Medtr1g075380	Medtr2g068950		Medtr8g014360	Medtr3g077430	Medtr7g076940
Medtr0096s0020	Medtr1g070230	Medtr5g026620		Medtr2g011170	Medtr1g025220	Medtr4g081120
Medtr4g094100	Medtr4g094418	Medtr5g010160		Medtr1g035690	Medtr1g060120	Medtr4g087740
Medtr3g491820	Medtr4g085800	Medtr2g075250		Medtr2g013140	Medtr3g115090	Medtr4g050590
Medtr1g063230	Medtr2g435550	Medtr4g103970		Medtr8g056790	Medtr1g112160	Medtr5g098800
Medtr4g122570	Medtr7g059100	Medtr8g069450		Medtr0489s0020	Medtr4g064530	Medtr3g032740
Medtr7g108855	Medtr4g066630	Medtr4g130850		Medtr4g009950	Medtr6g478190	Medtr4g125700
Medtr6g029200	Medtr8g432460	Medtr5g005230		Medtr7g089190	Medtr1g028330	Medtr2g027300
Medtr3g011950	Medtr2g072560	Medtr2g044940		Medtr7g058900	Medtr7g101080	Medtr0038s0060
Medtr4g101820	Medtr2g087950	Medtr7g028970		Medtr1g008980	Medtr1g036200	Medtr1g110270
Medtr4g070360	Medtr2g084965	Medtr7g050405		Medtr1g037520	Medtr7g058700	Medtr1g105965
Medtr2g094440	Medtr1g013100	MT4Noble_003252		Medtr5g006070	Medtr8g087870	Medtr5g008440
Medtr1g026460	Medtr4g080290	Medtr1g032010		Medtr6g069570	Medtr8g068690	Medtr4g114140
Medtr7g088520	Medtr7g079820	Medtr4g072550		Medtr3g101210	Medtr2g078670	Medtr3g086120
Medtr2g082410	Medtr2g019370	Medtr3g112530		Medtr5g085330	Medtr7g093370	Medtr1g105860
Medtr2g011720	Medtr5g024660	Medtr3g103510		Medtr5g019650	Medtr2g016630	Medtr3g085850
Medtr0050s0180	Medtr8g102900	Medtr7g066640		Medtr6g028090	Medtr3g103610	Medtr3g434850
Medtr4g031160	Medtr4g122930	Medtr3g100470		Medtr6g090615	Medtr8g005980	Medtr2g066750
Medtr1g017380	Medtr3g107890	Medtr4g071120		Medtr8g079810	Medtr8g038220	Medtr3g013950
Medtr0009s0390	Medtr2g025780	Medtr1g072280		Medtr4g131940	Medtr4g130510	Medtr2g009750
Medtr1g097270	Medtr8g043660	Medtr8g088250		Medtr3g114010	Medtr4g010340	Medtr7g028590
Medtr5g030280	Medtr3g077000	Medtr1g019290		Medtr7g092020	Medtr2g090735	Medtr3g109040
Medtr2g047912	Medtr2g096630	Medtr8g027265		Medtr3g111740	Medtr5g025230	Medtr0095s0020
Medtr5g012000	Medtr7g102450	Medtr1g112220		Medtr8g012240	Medtr7g490330	Medtr7g033800
Medtr3g080230	Medtr3g088940	Medtr3g048920		Medtr1g095730	Medtr7g015960	Medtr7g113100
Medtr7g085100	Medtr5g035580	Medtr8g075510		Medtr8g021380	Medtr8g066040	Medtr5g088310
Medtr1g033230	Medtr3g118380	Medtr4g057310		MT4Noble_050320	Medtr8g041770	Medtr4g053420
Medtr4g051120	Medtr8g467000	Medtr7g016800		MT4Noble_034223	Medtr7g109220	Medtr8g088150
Medtr8g100120	Medtr1g027500	Medtr8g464780		Medtr6g071040	Medtr3g465880	Medtr3g107050
Medtr2g089340	Medtr6g047590	Medtr6g033980		Medtr4g095450	Medtr5g081790	Medtr5g016080
Medtr2g036690	Medtr3g107630	Medtr4g089135		Medtr3g113310	Medtr5g019950	Medtr8g014030
Medtr3g058430	Medtr1g090807	Medtr2g093030		Medtr7g026340	Medtr3g025970	Medtr3g060690
Medtr2g061460	Medtr5g091830	Medtr4g089020		Medtr4g124040	Medtr7g092340	Medtr2g071620
Medtr3g020620	Medtr8g016390	Medtr1g069140		Medtr3g007240	Medtr5g081810	Medtr8g069770
Medtr2g104120	Medtr3g094690	Medtr4g130970		Medtr7g063490	Medtr5g021610	Medtr3g055990
Medtr7g113540	Medtr4g006650	Medtr7g108080		Medtr7g024390	Medtr4g019310	Medtr7g070510
Medtr4g131540	Medtr2g015690	Medtr1g100395		Medtr5g018300	Medtr7g011060	Medtr4g020550
Medtr4g031650	Medtr5g024390	Medtr8g464760		Medtr3g079340	Medtr0023s0210	Medtr8g090130
Medtr1g029990	Medtr3g109280	Medtr2g100690		Medtr4g127560	Medtr3g114810	Medtr8g015270
Medtr5g070088	Medtr4g021800	Medtr8g071170		Medtr4g072320	Medtr0023s0260	Medtr3g071560
Medtr2g029180	Medtr1g019510	Medtr8g074050		Medtr5g018610	Medtr4g123563	Medtr4g101990
Medtr5g013950	Medtr4g117510	Medtr4g007990		Medtr4g106790	Medtr4g088425	Medtr8g494200
Medtr8g479450	Medtr7g072420	Medtr2g059240		Medtr2g091145	Medtr1g018650	Medtr6g007040
Medtr3g061110	Medtr6g087320	Medtr3g110710		Medtr2g094060	Medtr4g016940	Medtr5g096320
Medtr4g072670	Medtr2g008030	Medtr3g062950		Medtr8g465910	Medtr5g070330	Medtr2g034350
Medtr3g100300	Medtr7g014630	Medtr5g048550		Medtr5g017470	Medtr4g065017	Medtr5g025470
Medtr3g479520	Medtr3g028540	Medtr8g089715		Medtr3g104560	Medtr2g081300	Medtr4g104430
Medtr2g436460	Medtr7g110810	Medtr2g008120		Medtr3g461470	Medtr8g102260	Medtr5g087560
Medtr8g059435	Medtr7g082570	Medtr4g085100		Medtr1g062200	Medtr5g045300	Medtr3g072350
Medtr7g023780	Medtr4g117500	Medtr3g031470		Medtr1g094185	Medtr8g005960	Medtr3g462950
Medtr1g086180	Medtr2g049020	Medtr2g056140		Medtr8g090125	Medtr7g093170	Medtr3g095260
Medtr1g007490	Medtr1g006975	Medtr8g085650		Medtr8g100065	Medtr7g015250	Medtr7g053240
Medtr4g066340	Medtr4g066580	Medtr3g082180		Medtr1g104850	Medtr4g014150	Medtr7g094100
Medtr3g078170	Medtr5g011120	Medtr4g083980		Medtr1g067220	Medtr1g062980	Medtr8g102050
Medtr1g083110	Medtr7g052300	Medtr8g058563		Medtr3g462390	Medtr3g099490	Medtr7g056133
Medtr4g057670	Medtr4g128310	Medtr2g026670		Medtr4g068220	Medtr7g015510	Medtr7g087400
Medtr7g076530	Medtr7g114410	Medtr3g466420		Medtr3g103960	Medtr0188s0020	Medtr8g069825
Medtr1g083740	Medtr3g095190	Medtr8g019480		Medtr3g028490	Medtr1g029470	Medtr2g061460
Medtr1g063360	Medtr1157s0010	Medtr2g089945		Medtr7g082730	Medtr1g102430	Medtr6g088270
Medtr1g008300	Medtr5g091100	Medtr3g105200		Medtr6g074810	MT4Noble_030165	Medtr2g048470
Medtr3g108040	Medtr6g011860	Medtr1g111430		Medtr1g086380	Medtr4g114240	Medtr5g097320
Medtr1g051385	Medtr4g093820	MT4Noble_000353		Medtr7g106820	Medtr3g075440	Medtr2g082410
Medtr3g467550	Medtr1g027540	Medtr6g083000		Medtr1g102630	Medtr8g102860	Medtr4g123810
Medtr4g051430	Medtr4g060890	Medtr2g090340		Medtr1g105820	Medtr0015s0030	Medtr2g011760
Medtr1g011520	Medtr3g109110	Medtr6g069300		Medtr8g092580	Medtr4g079700	Medtr0095s0100
Medtr4g094395	Medtr7g110780	Medtr3g093590		Medtr4g094698	Medtr6g008140	Medtr7g010100
Medtr1g092930	Medtr7g094260	Medtr3g101590		Medtr2g061780	Medtr8g063930	Medtr3g094710
Medtr7g114790	Medtr4g101760	Medtr7g033720		Medtr2g096970	Medtr8g469700	Medtr7g099390
Medtr3g075110	Medtr1g027580	Medtr8g077085		Medtr2g026160	MT4Noble_004662	Medtr4g093260
Medtr4g093620	Medtr5g054900	Medtr6g051680		Medtr3g073860	Medtr5g077640	Medtr5g067350
Medtr5g098930	Medtr4g043760	Medtr4g074995		Medtr1g110190	Medtr3g452360	Medtr2g029270
Medtr8g091670	Medtr5g082630	Medtr4g025900		Medtr5g018280	Medtr2g037700	Medtr1g085570
Medtr4g099050	Medtr7g113560	Medtr4g078110		Medtr2g013950	Medtr8g079520	Medtr2g088220
Medtr3g077200	Medtr6g018550	Medtr0283s0050		Medtr7g021750	Medtr8g103750	Medtr5g098310
Medtr1g068960	Medtr5g064530	Medtr4g129270		Medtr4g023050	Medtr2g030490	Medtr3g084520
Medtr8g089960	Medtr7g072480	Medtr1g094620		Medtr5g089895	Medtr3g030980	Medtr6g008680
Medtr0002s0820	Medtr2g100600	Medtr1g069110		Medtr4g129270	Medtr2g435810	Medtr1g051585
Medtr5g064030	Medtr1g023700	Medtr5g097530		Medtr2g079430	Medtr1g028100	Medtr2g436800
Medtr8g068845	Medtr1g083870	Medtr8g021190		Medtr8g068110	Medtr0286s0040	Medtr8g105590
Medtr5g095660	Medtr4g069160	Medtr5g010680		Medtr5g066730	Medtr4g057960	Medtr5g007240
Medtr7g058930	Medtr0428s0020	Medtr4g072020		Medtr4g035900	Medtr8g104870	Medtr1g098240
Medtr3g462700	Medtr1g022440	Medtr1g087300		Medtr3g102170	Medtr6g007975	Medtr4g094222
Medtr6g082590	MT4Noble_020366	Medtr1g105770		Medtr7g109460	Medtr4g126210	Medtr3g104920
Medtr7g029105	Medtr3g081640	Medtr3g037380		Medtr8g015910	Medtr1g115790	Medtr1g029790
Medtr2g078120	Medtr5g016570	Medtr2g022460		Medtr5g018570	Medtr1g102350	Medtr7g023260
Medtr3g039810	Medtr1g066640	Medtr4g122990		Medtr2g079630	Medtr8g095110	Medtr4g055030
Medtr5g027010	Medtr5g035560	Medtr4g082550		Medtr7g075910	Medtr1g076400	Medtr3g093870
Medtr8g102710	Medtr1g095530	Medtr8g058603		Medtr1g093080	Medtr7g062780	Medtr6g004670
Medtr2g061510	Medtr4g058760	Medtr2g450310		Medtr7g090470	Medtr1g111210	Medtr7g051440
Medtr3g111380	Medtr2g078930	Medtr4g035900		Medtr5g071070	Medtr1g045550	Medtr1g014730
Medtr8g094610	Medtr8g059170	Medtr4g120825		Medtr7g062950	Medtr8g099985	Medtr4g088920
Medtr1g097530	Medtr3g109930	Medtr6g071985		Medtr6g015645	Medtr3g009760	Medtr2g027530
Medtr3g025360	Medtr4g070630	Medtr8g059605		MT4Noble_027087	Medtr5g094810	Medtr4g010145
Medtr4g068230	Medtr7g086960	Medtr5g096593		Medtr7g072605	Medtr5g068260	Medtr1g107500
Medtr6g066360	Medtr3g461480	Medtr2g100260		Medtr8g445390	Medtr8g079472	Medtr4g113990
Medtr4g046047	Medtr8g012550	Medtr8g071920		Medtr5g023260	Medtr5g085400	Medtr3g463900
Medtr5g070480	Medtr2g105000	Medtr7g090370		Medtr7g062990	Medtr6g034930	Medtr4g116430
Medtr6g015455	Medtr2g075570	Medtr7g112400		Medtr7g078690	Medtr5g081360	Medtr1g084020
Medtr3g106480	Medtr1g077210	Medtr8g099270		Medtr7g090190	Medtr1g105710	Medtr1g073130
Medtr8g038390	Medtr8g014010	Medtr2g066830		Medtr7g112000	Medtr5g019050	Medtr5g069430
Medtr0287s0060	Medtr8g042820	Medtr8g046245		Medtr2g091175	Medtr2g084020	Medtr8g061950
Medtr3g080800	Medtr6g088450	Medtr3g067935		Medtr4g130970	Medtr8g007035	Medtr5g064750
Medtr6g026730	Medtr8g077040	Medtr1g098140		Medtr3g091540	Medtr6g038650	Medtr0699s0020
Medtr1g116000	Medtr4g107830	Medtr2g034700		Medtr2g437910	Medtr5g018365	Medtr4g068280
Medtr4g051532	Medtr4g128070	Medtr4g022800		Medtr5g031470	Medtr5g032910	Medtr1g099280
Medtr2g079710	Medtr8g098945	Medtr2g036063		Medtr4g132020	Medtr8g463180	Medtr5g015490
Medtr4g046023	Medtr2g075550	Medtr4g129020		Medtr7g055630	Medtr0363s0030	Medtr8g106010
Medtr6g003980	Medtr1g484920	Medtr8g102340		Medtr7g016820	Medtr7g099860	Medtr4g112780
Medtr8g103870	Medtr3g051460	Medtr4g012060		Medtr1g018580	Medtr8g027860	Medtr5g035070
Medtr1g073720	Medtr6g488290	Medtr5g096603		Medtr1g097850	Medtr7g092700	Medtr1g030890
Medtr8g467340	Medtr3g057800	Medtr7g112963		Medtr7g082530	Medtr1g088930	Medtr8g009290
Medtr8g061270	Medtr7g075540	Medtr3g041700		Medtr5g019350	Medtr8g046440	Medtr3g092030
Medtr4g072450	Medtr6g034560	Medtr3g030240		Medtr1g010140	Medtr4g081685	Medtr8g097220
Medtr4g057240	Medtr7g111320	Medtr8g075780		Medtr4g051688	Medtr2g438760	Medtr4g016780
Medtr3g020470	Medtr3g099700	Medtr1g109630		Medtr3g437630	Medtr7g028975	Medtr5g019940
Medtr6g036750	Medtr8g021025	Medtr7g018840		Medtr4g120760	Medtr3g017490	Medtr3g098430
Medtr3g068085	Medtr5g013070	Medtr4g114640		Medtr5g079880	Medtr5g081040	Medtr7g038700
Medtr3g462090	Medtr3g051420	Medtr7g068320		Medtr7g082533	Medtr5g038910	Medtr4g114550
Medtr3g088100	Medtr8g063280	Medtr7g108875		Medtr1g103150	Medtr6g045633	Medtr7g405790
Medtr3g061390	Medtr1g032240	Medtr3g023020		Medtr6g074610	Medtr7g111960	Medtr3g094840
Medtr7g085470	Medtr1g090717	Medtr5g088350		Medtr3g464550	Medtr7g118270	Medtr2g461020
Medtr1g045670	Medtr1g044785	Medtr4g131800		Medtr1g067650	Medtr2g102520	Medtr8g088745
Medtr7g012860	Medtr2g084315	Medtr1g083780		Medtr7g066880	Medtr5g090580	Medtr6g091770
Medtr3g096150	Medtr8g071900	Medtr7g105870		Medtr6g037220	Medtr8g015200	Medtr1g103020
Medtr3g464000	Medtr7g010760	Medtr3g014750		Medtr3g028270	Medtr4g078535	Medtr6g088465
Medtr7g083820	Medtr5g067460	Medtr4g121600		Medtr8g016640	Medtr4g114280	Medtr8g035880
Medtr2g061490	Medtr1g015000	Medtr1g094250		Medtr5g081710	Medtr5g091370	Medtr5g016100
Medtr0040s0110	Medtr4g017650	Medtr7g115120		Medtr6g061710	Medtr4g014900	Medtr7g016960
MT4Noble_017863	Medtr4g026050	Medtr7g106820		Medtr7g090500	Medtr5g009410	Medtr1g102890
Medtr8g099605	Medtr1g086510	Medtr8g006430		Medtr4g073920	Medtr8g032420	Medtr5g009490
Medtr4g100600	Medtr1g100733	Medtr8g085210		Medtr8g098930	Medtr8g015100	Medtr7g076230
Medtr4g051350	Medtr2g011450	Medtr2g015870		Medtr8g027345	Medtr7g023740	Medtr4g101750
Medtr4g088440	Medtr4g071060	Medtr4g019210		Medtr4g052320	Medtr3g079750	Medtr7g088830
Medtr3g072920	Medtr3g026160	Medtr2g069320		Medtr1g110670	Medtr7g009450	Medtr1g114000
Medtr3g118210	Medtr5g064845	Medtr4g120760		Medtr1g013800	Medtr1g079180	Medtr2g091140
Medtr5g095820	Medtr5g020900	Medtr8g102375		Medtr5g055680	Medtr3g069670	Medtr5g035280
Medtr1g100220	Medtr1g078170	Medtr8g017410		Medtr8g024520	Medtr4g019780	Medtr1g084240
Medtr3g063200	Medtr8g042060	Medtr7g084040		Medtr2g044070	Medtr2g099690	Medtr7g066210
Medtr1g040635	Medtr3g090660	Medtr7g092400		Medtr1g021642	Medtr7g011663	Medtr1g026380
Medtr5g090440	Medtr3g075390	Medtr8g023060		Medtr5g065130	Medtr3g106060	Medtr8g009630
Medtr8g075810	Medtr1g012335	Medtr3g466760		MT4Noble_047370	Medtr2g039910	Medtr6g033995
Medtr1g069240	Medtr3g105340	Medtr8g091590		Medtr4g081530	Medtr8g074350	Medtr7g113450
Medtr4g015540	Medtr2g075540	Medtr4g116360		Medtr7g024290	Medtr8g038815	Medtr6g071430
Medtr6g034515	MT4Noble_057127	Medtr1g033830		Medtr5g092060	Medtr8g038150	Medtr5g040920
Medtr7g010300	Medtr4g012850	Medtr4g126790		Medtr6g090380	Medtr2g046740	Medtr6g034005
Medtr8g058785	Medtr1g105615	Medtr2g022480		Medtr7g082537	Medtr2g073420	Medtr7g070210
Medtr3g072900	Medtr4g011230	Medtr5g041780		Medtr5g079840	Medtr1g110120	Medtr5g094610
Medtr7g011100	Medtr4g117520	Medtr3g105210		Medtr4g121913	Medtr6g023460	Medtr7g026230
MT4Noble_025416	Medtr8g030590	Medtr2g037830		Medtr2g061820	Medtr1g022350	Medtr8g106520
Medtr8g007365	Medtr3g103580	Medtr7g083660		Medtr2g042900	Medtr8g042660	Medtr3g112100
Medtr1g076370	Medtr5g064840	MT4Noble_053502		Medtr5g024880	Medtr1g021100	Medtr5g024730
Medtr6g014290	Medtr4g097380	Medtr7g018310		Medtr6g088785	Medtr6g049280	Medtr4g116190
Medtr4g130530	Medtr2g016030	Medtr3g091510		Medtr1g115840	Medtr5g073610	Medtr3g117710
Medtr7g018980	Medtr0003s0580	Medtr7g111380		Medtr7g112150	Medtr4g030210	Medtr8g103490
Medtr3g084190	Medtr4g081530	Medtr1g054365		Medtr6g016640	Medtr3g073590	Medtr1g021760
Medtr4g071860	Medtr4g074190	Medtr1g014930		Medtr5g078140	Medtr7g091890	Medtr2g009500
Medtr8g030600	Medtr4g128410	Medtr7g066620		Medtr5g007640	Medtr8g045070	Medtr1g108440
Medtr3g437840	Medtr7g090820	Medtr1g053965		Medtr4g025730	Medtr7g038910	Medtr3g102780
Medtr1g031740	Medtr2g090190	MT4Noble_020046		Medtr6g011370	Medtr3g099740	Medtr5g094850
Medtr1g041745	MT4Noble_000351	Medtr8g072610		Medtr5g092210	Medtr7g024300	Medtr3g099140
Medtr3g079240	Medtr4g099060	Medtr8g105230		Medtr3g110450	Medtr6g049320	Medtr4g015950
Medtr3g097290	Medtr1g032160	Medtr3g117560		Medtr6g027460	Medtr1g098550	Medtr2g082990
Medtr7g096280	Medtr2g011600	Medtr8g070000		Medtr3g094630	Medtr1g029750	Medtr7g009330
Medtr6g477880	Medtr5g028020	Medtr3g072800		Medtr3g069290	Medtr8g468680	Medtr8g099300
Medtr3g007670	Medtr4g087110	Medtr4g064005		Medtr4g093820	Medtr8g010200	Medtr1g051025
Medtr1g060010	Medtr7g100120	Medtr1g016290		Medtr8g096900	Medtr7g088620	Medtr8g061890
Medtr7g021970	Medtr7g107690	Medtr0035s0150		Medtr4g051655	Medtr6g033580	Medtr0129s0050
Medtr1g064230	Medtr7g068420	Medtr2g037790		Medtr1g037250	Medtr5g059820	Medtr3g111500
Medtr1g106055	MT4Noble_042226	Medtr1g112660		Medtr8g432470	Medtr5g006820	Medtr6g089570
Medtr2g018740	Medtr0314s0030	MT4Noble_033064		Medtr6g016650	Medtr4g051695	Medtr4g055633
Medtr7g019130	Medtr7g013260	Medtr4g090350		Medtr2g013370	Medtr4g129510	Medtr3g452020
Medtr4g050000	Medtr2g033170	Medtr2g012270		Medtr3g098350	Medtr2g438720	Medtr2g007190
Medtr0002s1270	Medtr1g032220	Medtr7g022490		Medtr5g033590	Medtr7g007550	Medtr1g038430
Medtr3g101510	Medtr4g068870	Medtr8g068520		Medtr2g049410	MT4Noble_036341	Medtr4g055630
Medtr4g088785	Medtr2g019190	Medtr1g054055		Medtr4g023030	Medtr4g127840	Medtr5g015570
Medtr2g015390	Medtr3g108730	Medtr1g105600		Medtr4g093140	Medtr2g082090	Medtr7g073250
Medtr5g035050	Medtr1g086990	Medtr4g079290		Medtr7g113490	Medtr5g037300	Medtr5g071817
Medtr1g096000	Medtr0428s0010	Medtr4g098500		Medtr4g091380	MT4Noble_055304	Medtr4g043660
Medtr4g021220	Medtr8g064760	MT4Noble_044137		Medtr7g102820	Medtr6g084590	Medtr1g028130
Medtr3g092710	Medtr1g087330	Medtr2g026160		Medtr7g094870	Medtr1g041695	Medtr1g063330
Medtr4g055410	MT4Noble_020443	Medtr4g109220		Medtr3g101290	Medtr5g010500	Medtr1g045410
Medtr8g098240	Medtr4g097400	Medtr6g037560		Medtr1g111100	Medtr6g083760	MT4Noble_001503
Medtr3g466250	MT4Noble_001952	Medtr7g016840		Medtr1g086095	Medtr2g016710	Medtr7g034465
Medtr8g024630	Medtr8g014520	Medtr5g092210		Medtr1g036460	Medtr7g081720	Medtr6g008220
Medtr4g131750	Medtr2g072930	Medtr2g066800		Medtr8g041690	Medtr2g015840	Medtr3g118360
Medtr4g118700	Medtr2g072260	Medtr2g014550		Medtr4g044110	Medtr4g081650	Medtr3g032760
Medtr1g054665	Medtr2g032030	Medtr5g015680		Medtr5g091050	Medtr2g038410	Medtr4g109920
Medtr6g040070	Medtr3g102680	Medtr8g077950		Medtr2g072160	Medtr5g025900	Medtr8g088270
Medtr6g088270	Medtr2g025740	Medtr2g014900		Medtr8g447290	Medtr8g068450	Medtr4g078545
Medtr7g077810	Medtr5g083750	Medtr8g107230		Medtr8g087410	Medtr3g464840	Medtr8g032270
Medtr7g023070	Medtr5g022310	Medtr4g115330		Medtr3g082770	Medtr3g095040	Medtr0007s0080
Medtr2g073350	Medtr4g078390	Medtr8g038740		Medtr2g086870	Medtr1g022950	Medtr4g036455
Medtr2g450220	Medtr1g066380	Medtr2g096830		Medtr1g067640	Medtr7g016950	MT4Noble_055724
Medtr7g069210	Medtr6g488280	Medtr7g093820		Medtr4g028090	Medtr8g027465	Medtr8g096950
Medtr8g039530	Medtr5g065960	Medtr3g085400		Medtr2g076490	Medtr8g479390	MT4Noble_009141
Medtr7g073610	Medtr5g014150	Medtr7g112530		Medtr2g099630	Medtr2g437660	Medtr4g016740
Medtr2g078900	Medtr2g022780	Medtr3g094160		Medtr8g079330	Medtr7g086710	Medtr8g104120
Medtr5g027290	Medtr7g029290	Medtr1g007325		Medtr5g069580	Medtr3g071610	Medtr5g006460
Medtr0014s0210	Medtr4g124470	Medtr4g116170		Medtr8g006870	Medtr8g469830	Medtr4g097500
Medtr2g063080	Medtr6g028100	Medtr5g024300		Medtr7g013170	Medtr6g078070	Medtr5g094220
Medtr3g098740	Medtr6g082620	Medtr8g058620		Medtr8g079335	Medtr3g110530	Medtr2g078310
Medtr7g069950	Medtr2g076490	Medtr1g078030		Medtr3g093970	Medtr1g027880	Medtr4g058820
Medtr4g115075	Medtr7g106450	Medtr1g114510		Medtr1g106420	Medtr1g036750	Medtr4g074260
Medtr4g022760	Medtr1g067480	Medtr8g067465		Medtr0005s0070	Medtr4g088695	Medtr2g040350
Medtr7g071940	Medtr4g019640	Medtr1g077930		Medtr4g051515	Medtr8g027920	Medtr2g078520
Medtr5g076350	Medtr8g015560	Medtr7g108840		Medtr8g090120	Medtr6g470960	Medtr5g070320
Medtr7g030070	Medtr4g070860	Medtr1g017270		Medtr4g088900	Medtr6g008500	Medtr4g095032
Medtr7g073530	Medtr1g074950	Medtr5g091950		Medtr3g467420	Medtr8g070890	Medtr1g032520
Medtr4g075120	Medtr3g086760	Medtr5g011580		Medtr2g016530	Medtr3g083920	Medtr4g094452
Medtr6g007090	Medtr3g113800	Medtr3g077950		Medtr8g432450	Medtr3g028520	Medtr1g050545
Medtr0072s0040	Medtr4g119850	Medtr3g117590		Medtr4g064923	Medtr4g068050	Medtr7g107380
Medtr1g072640	Medtr7g087400	Medtr7g077860		Medtr3g111410	Medtr3g016350	Medtr6g007887
Medtr4g117350	Medtr8g028615	Medtr4g009873		Medtr8g059170	Medtr8g077150	Medtr7g080290
Medtr2g018680	Medtr4g123080	Medtr4g120830		Medtr3g082180	Medtr1g015940	Medtr1g114250
Medtr3g074490	Medtr7g076650	Medtr7g109130		Medtr8g064810	Medtr7g095890	Medtr2g034040
Medtr1g039490	Medtr4g051622	Medtr4g083000		Medtr8g432490	Medtr5g011310	Medtr2g026635
Medtr5g069660	Medtr1g093920	Medtr7g018290		Medtr5g012390	Medtr2g438740	Medtr3g012470
Medtr8g468570	Medtr7g072270	Medtr1g095510		Medtr5g013520	Medtr2g012370	Medtr7g108310
Medtr6g004030	Medtr5g024080	Medtr1g090060		MT4Noble_003850	Medtr4g114250	Medtr4g107330
Medtr3g075050	Medtr3g009400	Medtr8g086520		Medtr8g099750	Medtr1g040155	Medtr3g053230
Medtr3g062930	Medtr4g095050	Medtr8g058050		Medtr1g044470	Medtr5g030130	Medtr5g043780
Medtr0381s0010	Medtr1g029140	Medtr2g089905		Medtr8g010220	Medtr2g044830	Medtr2g040580
Medtr4g131720	Medtr5g041940	Medtr4g102740		Medtr4g133620	Medtr8g470970	Medtr7g093900
Medtr1g077690	Medtr3g098440	Medtr8g095210		Medtr5g064345	Medtr3g019420	Medtr1g086070
Medtr1g085280	Medtr4g057200	Medtr2g450040		Medtr5g032060	Medtr2g092930	Medtr3g063220
Medtr7g094900	Medtr3g118370	Medtr4g010120		Medtr4g033385	Medtr3g055120	Medtr5g009110
Medtr7g405770	Medtr5g074290	Medtr8g033090		Medtr3g072500	Medtr3g464530	Medtr1g098280
Medtr3g005360	Medtr4g120130	Medtr5g021290		Medtr6g075030	Medtr7g074240	Medtr1g050505
Medtr5g043580	Medtr8g015910	Medtr2g020040		Medtr8g067050	Medtr8g058965	Medtr7g056330
Medtr3g467460	Medtr1g097840	Medtr1g019285		Medtr4g057600	Medtr5g010830	Medtr2g085065
Medtr8g074070	Medtr7g017880	MT4Noble_019543		Medtr8g020920	Medtr4g005860	Medtr7g103020
Medtr7g024140	Medtr8g089820	Medtr4g072280		Medtr8g028550	Medtr4g017730	Medtr4g119100
Medtr3g095070	Medtr1g015860	Medtr4g095600		Medtr6g061940	Medtr2g100340	Medtr7g098440
Medtr3g110032	Medtr3g101260	Medtr2g096330		Medtr3g023010	MT4Noble_026744	Medtr8g026730
Medtr7g038690	Medtr1g081625	Medtr3g047950		Medtr4g075690	Medtr3g031520	Medtr4g093560
Medtr7g012330	Medtr7g080900	Medtr5g037890		Medtr3g084620	Medtr1g053900	Medtr8g018730
Medtr5g094300	Medtr3g034670	Medtr6g071990		Medtr1g009180	Medtr6g088790	Medtr5g092610
Medtr3g117485	Medtr4g065077	Medtr1g046690		Medtr5g018320	Medtr7g074710	Medtr1g087200
Medtr6g087780	Medtr8g088200	Medtr5g022130		MT4Noble_050029	Medtr7g076000	Medtr3g099150
Medtr4g046043	Medtr8g026960	Medtr4g108700		Medtr2g040530	Medtr1g102240	Medtr4g071680
Medtr4g015550	Medtr3g117850	Medtr4g052400		Medtr6g022790	Medtr8g018450	Medtr4g008150
Medtr2g437990	Medtr2g069430	Medtr1g041380		Medtr2g089120	Medtr0087s0040	Medtr2g038250
Medtr7g094890	Medtr2g014680	Medtr4g119930		Medtr7g081655	Medtr5g098580	Medtr1g031490
Medtr4g049340	Medtr2g064405	Medtr6g059680		Medtr2g087840	Medtr6g023600	Medtr4g019450
Medtr4g014370	Medtr6g047610	Medtr1g069340		Medtr7g071103	Medtr4g086320	Medtr8g063200
Medtr5g043620	Medtr8g087810	Medtr7g100630		Medtr4g105110	Medtr6g033850	Medtr2g450710
Medtr2g043230	Medtr1g090010	Medtr3g052490		Medtr8g098975	Medtr3g093830	Medtr7g100328
Medtr7g045270	Medtr3g067720	Medtr6g045257		Medtr7g118300	Medtr4g134130	Medtr5g055000
Medtr1g088990	Medtr3g090950	Medtr3g085050		Medtr1g050525	Medtr4g014140	Medtr6g021800
Medtr3g435450	Medtr1g011650	Medtr7g111530		Medtr2g022480	Medtr3g455910	Medtr4g129920
Medtr6g090520	Medtr1g035140	Medtr1g095780		MT4Noble_028178	Medtr4g068270	Medtr3g108700
Medtr4g056040	Medtr8g069955	Medtr2g085025		Medtr1g075250	Medtr0735s0010	Medtr6g059820
MT4Noble_004388	Medtr5g045520	Medtr1g050472		Medtr1g060490	Medtr5g094210	Medtr5g047530
Medtr4g013175	Medtr8g022270	Medtr2g082550		Medtr1g069110	MT4Noble_013740	Medtr7g074680
Medtr4g083580	Medtr4g066240	Medtr8g468030		Medtr8g043470	Medtr3g027650	Medtr5g027095
Medtr8g089700	Medtr1g059760	Medtr3g117320		Medtr3g107090	Medtr4g126150	Medtr2g099465
Medtr3g088610	Medtr2g042340	Medtr1g071540		Medtr2g023890	Medtr1g035730	Medtr6g083300
Medtr1g030630	Medtr7g077330	Medtr7g108070		Medtr5g057345	Medtr7g111980	Medtr5g027090
Medtr1g069565	Medtr8g070480	Medtr4g021450		Medtr1g087330	Medtr8g016480	Medtr4g119790
Medtr0256s0050	Medtr5g031250	Medtr2g008100		Medtr1870s0010	Medtr8g024380	Medtr3g062590
Medtr4g116350	Medtr2g043710	Medtr5g007730		Medtr4g134110	Medtr3g078700	MT4Noble_057056
Medtr7g057760	Medtr7g028250	Medtr3g448370		Medtr4g103655	Medtr7g015550	Medtr2g095180
Medtr4g116080	Medtr7g095170	Medtr4g133450		Medtr5g012490	Medtr8g012655	Medtr3g093570
Medtr4g095780	Medtr2g013030	Medtr5g094010		Medtr4g033395	Medtr8g096920	Medtr3g020660
Medtr7g007280	Medtr3g103570	Medtr0340s0030		Medtr8g446830	Medtr4g046677	Medtr7g053450
Medtr7g024150	Medtr7g085840	Medtr7g065640		Medtr5g078030	Medtr2g096030	Medtr8g040700
Medtr2g104640	Medtr4g125670	Medtr6g015315		Medtr2g101120	Medtr2g016590	Medtr2g009520
Medtr4g081420	Medtr1g076990	Medtr7g074880		Medtr1g066810	Medtr1g037010	Medtr4g080120
Medtr4g134540	Medtr5g013530	Medtr4g134590		Medtr8g099035	Medtr6g012170	Medtr4g078230
Medtr1g116170	Medtr7g080450	Medtr8g094760		MT4Noble_040607	Medtr1g099290	Medtr2g036480
Medtr4g088840	Medtr8g078170	Medtr7g083770		Medtr7g083410	Medtr8g019450	Medtr4g122920
Medtr5g091640	Medtr5g070680	Medtr2g041620		Medtr5g094760	Medtr1g099240	MT4Noble_029039
Medtr5g013300	Medtr8g070510	Medtr7g103300		Medtr8g079360	Medtr4g057595	Medtr1g082430
Medtr4g033500	MT4Noble_034114	Medtr4g123760		Medtr1g029600	Medtr6g038790	Medtr0028s0090
Medtr6g086760	Medtr8g086470	Medtr2g088230		Medtr3g105320	Medtr8g018280	Medtr1g043240
Medtr0572s0010	Medtr1g052135	Medtr7g451050		Medtr5g464340	Medtr4g105600	Medtr3g081560
Medtr6g069180	Medtr2g090755	Medtr2g101560		Medtr1g104610	Medtr5g013610	MT4Noble_053520
Medtr4g051410	Medtr0101s0020	Medtr5g011340		Medtr6g026850	Medtr8g470370	Medtr2g094180
Medtr3g006800	Medtr1g112060	Medtr4g011670		Medtr5g064360	Medtr4g133890	Medtr1g040105
Medtr3g092980	Medtr4g114105	Medtr7g086510		Medtr3g084630	Medtr2g037690	Medtr5g014370
Medtr7g081615	Medtr6g461650	Medtr3g067825		Medtr1g086153	Medtr8g068440	Medtr4g100920
Medtr8g035560	Medtr4g127120	Medtr5g077430		Medtr6g082890	Medtr7g079970	Medtr5g020465
Medtr8g070940	Medtr4g127140	Medtr2g042430		Medtr5g064340	Medtr3g016270	Medtr7g098290
Medtr4g115930	Medtr1g107380	Medtr1g066810		Medtr5g063720	Medtr4g069250	Medtr8g105340
Medtr6g445320	Medtr1408s0010	Medtr5g065130		Medtr5g009160	Medtr7g115040	Medtr3g062320
Medtr4g127420	Medtr0066s0040	Medtr4g072330		Medtr4g073140	Medtr1g010240	Medtr1g060610
Medtr1g105090	Medtr1g112170	Medtr8g090135		Medtr4g094762	Medtr8g015040	Medtr4g109500
Medtr7g076270	Medtr3g078420	Medtr5g096760		MT4Noble_056928	Medtr2g101870	Medtr7g102550
Medtr8g007485	Medtr0066s0050	Medtr1g069355		Medtr4g029430	Medtr1g030220	Medtr8g101690
Medtr7g092740	Medtr0428s0030	Medtr6g015150		Medtr3g013500	Medtr3g016275	Medtr8g098805
Medtr8g096030	Medtr4g094428	Medtr6g082330		Medtr2g021310	MT4Noble_015337	Medtr6g034380
Medtr1g039790	Medtr3g108890	Medtr6g025740		Medtr5g096780	Medtr3g073180	Medtr7g112770
Medtr8g012210	Medtr3g078300	Medtr5g023150		Medtr1g040500	Medtr5g067680	MT4Noble_038556
Medtr7g083030	Medtr4g044110	Medtr4g007300		Medtr6g028140	Medtr8g068990	Medtr2g100030
Medtr2g014920	Medtr5g073660	Medtr5g017790		Medtr3g088450	Medtr4g077100	Medtr1g088700
Medtr3g110042	Medtr4g070810	Medtr2g011270		Medtr2g056130	Medtr8g023770	Medtr1g050750
Medtr6g091880	Medtr3g060280	Medtr4g098460		Medtr2g099140	Medtr3g070900	Medtr2g105930
Medtr3g111360	Medtr4g133230	Medtr2g036060		Medtr1g048470	Medtr2g037140	Medtr7g094220
Medtr4g021170	Medtr5g089180	Medtr3g104600		Medtr6g088475	Medtr4g094730	Medtr5g038970
Medtr7g073260	Medtr2g438140	Medtr8g465860		Medtr4g112025	Medtr7g082430	Medtr5g090610
Medtr7g061550	Medtr3g092470	Medtr4g124005		Medtr3g094690	Medtr7g050950	Medtr2g043530
Medtr7g067490	Medtr0005s0070	Medtr1g062200		Medtr3g086310	Medtr1g031520	Medtr3g115490
Medtr7g073560	Medtr1g012600	Medtr1g034290		Medtr6g088525	Medtr4g063310	Medtr4g087600
Medtr8g099430	Medtr2g068920	Medtr7g016820		MT4Noble_039939	Medtr0002s1200	Medtr0318s0020
Medtr2g076400	Medtr1g063900	Medtr1g106030		Medtr3g451630	Medtr4g012330	Medtr3g094860
Medtr5g091560	Medtr3g105820	Medtr1g099420		Medtr3g094670	Medtr8g012960	Medtr4g094662
Medtr4g077470	Medtr4g094548	Medtr5g013020		Medtr1g057560	Medtr4g107440	Medtr3g084340
Medtr4g036110	Medtr1g110570	Medtr3g088580		Medtr4g025900	Medtr6g488090	Medtr4g130660
Medtr3g075470	Medtr4g013210	Medtr2g098030		Medtr2g026820	Medtr3g100100	Medtr1g032290
Medtr1g073530	Medtr4g089100	Medtr7g112460		Medtr4g021330	Medtr3g088010	Medtr1g062160
Medtr7g035310	Medtr5g018260	Medtr4g033300		Medtr3g463060	Medtr1g104590	Medtr1g090687
MT4Noble_025707	Medtr2g031370	Medtr2g041430		Medtr8g037880	Medtr6g036500	Medtr5g094230
Medtr1g094180	Medtr4g094010	Medtr2g010890		Medtr3g010130	Medtr4g081250	Medtr1g116957
Medtr3g065890	Medtr1g018610	Medtr0001s0560		Medtr3g089400	Medtr1g115820	Medtr4g134350
Medtr8g102480	Medtr8g092650	Medtr5g062660		Medtr5g017110	Medtr7g015420	Medtr7g105080
Medtr5g043780	Medtr3g086630	Medtr4g033435		Medtr6g005220	MT4Noble_048562	Medtr6g008850
Medtr7g029325	Medtr5g027870	Medtr8g014590		Medtr6g027450	Medtr1g075260	Medtr4g077760
Medtr3g086050	Medtr3g115170	Medtr7g112403		Medtr8g009590	Medtr8g073770	Medtr4g050300
Medtr2g072790	Medtr4g092110	Medtr3g098680		Medtr5g021060	Medtr1g116947	Medtr5g033700
Medtr4g109330	Medtr0009s0050	Medtr1g110090		Medtr3g087770	Medtr3g070800	Medtr5g096890
Medtr8g010130	Medtr1g007880	Medtr4g129950		Medtr7g113520	Medtr3g093710	Medtr8g015840
Medtr7g084830	Medtr7g085930	Medtr6g090380		Medtr2g062730	Medtr2g067980	Medtr8g039530
Medtr7g100340	Medtr3g095730	Medtr3g109870		Medtr1g043700	Medtr6g015730	Medtr8g063210
Medtr3g061530	Medtr1g089890	Medtr2g011280		Medtr4g102040	Medtr5g006520	MT4Noble_013738
Medtr8g006755	Medtr2g451510	Medtr1g484960		Medtr4g132740	Medtr5g086530	Medtr1g031230
Medtr5g043920	Medtr3g098580	Medtr1g083400		Medtr6g088885	Medtr5g083730	Medtr5g082270
Medtr2g016740	Medtr4g095500	Medtr1g086310		Medtr4g088475	Medtr0474s0020	Medtr2g436150
Medtr6g017035	Medtr4g083970	Medtr2g011820		Medtr1g100200	Medtr8g469720	Medtr7g047270
Medtr3g075500	Medtr7g102560	Medtr2g022840		Medtr7g077670	Medtr5g024420	Medtr7g107400
Medtr6g053620	Medtr4g019710	Medtr5g030360		MT4Noble_022657	Medtr1g087710	Medtr1g031140
Medtr5g008620	Medtr4g094090	Medtr7g085440		Medtr3g085940	Medtr4g050762	Medtr7g406850
Medtr4g081180	Medtr5g024990	Medtr1g036460		Medtr1g492700	Medtr1g105755	Medtr3g019120
Medtr1g115235	Medtr7g085260	Medtr4g133060		Medtr1g022970	Medtr3g099030	Medtr1034s0010
Medtr2g060420	Medtr8g061110	Medtr1g017990		Medtr3g094120	Medtr7g009570	Medtr4g105770
Medtr8g467540	Medtr4g035905	Medtr4g013770		Medtr7g107230	Medtr5g025650	Medtr8g079690
Medtr4g006000	Medtr7g056430	Medtr1g019270		Medtr7g116850	Medtr5g098610	Medtr8g470540
Medtr3g452660	Medtr4g007830	Medtr8g464390		Medtr3g083620	Medtr3g016080	Medtr7g094510
Medtr7g079730	Medtr2g009890	Medtr4g033215		Medtr5g086020	Medtr4g107510	Medtr4g115120
Medtr1g101310	Medtr3g034660	Medtr8g095080		Medtr7g113900	Medtr6g082980	Medtr2g090635
Medtr8g075230	Medtr4g077210	Medtr4g033295		Medtr4g118855	Medtr7g058550	Medtr1g067180
Medtr7g015860	Medtr1g102360	Medtr2g079900		Medtr4g065060	Medtr2g022250	Medtr1g014040
Medtr1g067010	Medtr5g034970	Medtr1g096780		Medtr1g070940	Medtr3g048740	Medtr5g018400
Medtr6g025680	Medtr4g114210	Medtr1g017900		Medtr8g012550	Medtr7g023590	Medtr0349s0040
MT4Noble_046848	Medtr7g112320	Medtr2g068840		Medtr1g082370	Medtr4g076490	Medtr6g016275
MT4Noble_002673	Medtr5g032570	Medtr7g091490		Medtr3g084400	Medtr1g025700	Medtr2g097620
Medtr0154s0040	Medtr5g011770	Medtr4g131020		Medtr8g021225	Medtr4g035180	Medtr2g072310
Medtr2g025520	Medtr4g062510	Medtr1g075250		Medtr3g069540	Medtr1g060990	Medtr5g011070
Medtr8g076010	Medtr5g079340	Medtr1g082370		Medtr1g081660	Medtr3g008170	Medtr6g005460
Medtr8g019540	Medtr5g085300	Medtr8g063470		Medtr1g008170	Medtr8g107110	Medtr8g071250
Medtr1g111010	Medtr1g044470	Medtr3g078240		Medtr4g115390	Medtr3g464810	Medtr1g064500
Medtr8g013910	Medtr5g019460	Medtr1g095730		Medtr8g091560	Medtr7g073380	Medtr4g096690
Medtr5g006615	Medtr4g022550	Medtr2g102640		Medtr3g062990	Medtr6g074875	Medtr4g129230
Medtr7g085150	Medtr5g080360	Medtr1g106630		Medtr8g066790	Medtr2g090695	Medtr2g086500
Medtr8g445520	Medtr6g060500	Medtr8g011710		Medtr1g026075	Medtr8g078790	Medtr5g095530
Medtr8g018420	Medtr4g021330	Medtr5g069580		Medtr3g082070	Medtr5g061610	Medtr4g129490
Medtr0015s0090	Medtr2g099040	Medtr4g077740		Medtr4g120750	Medtr8g028895	Medtr6g073880
Medtr7g094830	Medtr3g082750	Medtr5g087690		Medtr5g064120	Medtr1g074930	Medtr1g080860
Medtr4g114000	Medtr2g086530	Medtr1g109600		Medtr7g073320	Medtr3g070560	Medtr6g043210
MT4Noble_047601	Medtr4g083590	Medtr7g112550		Medtr4g117600	Medtr5g018210	Medtr3g108630
Medtr4g122635	Medtr3g466180	Medtr6g032770		Medtr8g087530	MT4Noble_013916	Medtr3g108290
Medtr8g041650	Medtr4g009950	Medtr7g108950		Medtr7g087100	Medtr4g092530	Medtr8g096030
Medtr8g104420	Medtr4g120380	Medtr2g044600		Medtr4g076970	MT4Noble_051537	Medtr0291s0010
Medtr4g027390	Medtr4g064887	Medtr8g098885		Medtr2g090900	Medtr8g432370	Medtr8g033360
Medtr3g088420	Medtr2g078990	Medtr2g013580		Medtr4g010320	Medtr3g083130	Medtr4g103800
Medtr5g048670	Medtr8g009820	Medtr1g097910		Medtr3g107940	Medtr5g024450	Medtr1g069585
Medtr3g010330	Medtr6g021730	Medtr2g064470		Medtr8g104270	MT4Noble_011909	Medtr8g464010
MT4Noble_029038	Medtr8g487720	Medtr4g010130		Medtr7g077690	Medtr4g092640	Medtr2g015280
Medtr3g460770	Medtr4g010530	MT4Noble_051321		Medtr4g124440	Medtr1g105840	Medtr5g062240
Medtr4g092700	Medtr1g112860	Medtr1g087370		Medtr3g103050	Medtr4g088500	MT4Noble_024652
Medtr0082s0050	Medtr3g062600	Medtr1g069000		Medtr8g086640	Medtr4g114960	Medtr6g072480
Medtr1g078160	Medtr3g102400	Medtr4g063557		Medtr3g090440	Medtr3g449540	MT4Noble_043689
Medtr5g092500	MT4Noble_031969	Medtr4g059670		Medtr7g086380	Medtr5g013030	Medtr6g007760
Medtr4g080360	Medtr0078s0060	Medtr8g069800		Medtr5g092340	Medtr2g040510	Medtr7g100280
Medtr2g079800	Medtr4g114600	Medtr7g029015		Medtr7g007680	Medtr5g064640	Medtr5g007040
Medtr8g012595	Medtr4g035895	Medtr1g070455		Medtr4g070540	Medtr0110s0020	Medtr7g118130
Medtr1g069945	Medtr7g083130	MT4Noble_037169		Medtr5g091800	Medtr8g064840	Medtr3g118290
Medtr7g114560	Medtr4g037690	Medtr8g097040		Medtr4g052040	Medtr7g082510	Medtr8g105580
Medtr1g072320	Medtr6g016425	Medtr2g029800		Medtr2g017930	Medtr5g045960	Medtr8g089840
Medtr4g087090	Medtr1g023600	Medtr4g065023		Medtr4g065640	Medtr1g054670	Medtr1g041685
Medtr3g088970	Medtr1g109280	Medtr6g035295		Medtr2g016460	Medtr3g028720	Medtr1g099520
Medtr7g110720	Medtr4g085750	Medtr3g016255		Medtr4g007640	Medtr7g009510	Medtr5g046750
Medtr2g086700	Medtr4g011250	Medtr5g083720		Medtr4g094060	Medtr1g110980	Medtr3g019530
Medtr1319s0010	Medtr1g031650	Medtr7g098010		Medtr3g050170	Medtr2g451100	Medtr6g074030
Medtr6g022210	Medtr3g072070	Medtr1g069430		Medtr2g096040	Medtr7g063570	Medtr3g056675
Medtr3g101190	Medtr7g112800	Medtr8g071890		Medtr4g015790	Medtr1g088935	Medtr4g116080
Medtr4g029600	Medtr1g089910	Medtr3g084260		Medtr8g079900	Medtr0036s0050	Medtr3g068065
Medtr5g026320	Medtr7g112420	Medtr8g037205		Medtr4g010200	Medtr7g090630	Medtr7g069640
Medtr2g437380	Medtr7g064070	Medtr8g104210		Medtr8g068390	Medtr1g105020	Medtr2g105380
Medtr5g061860	Medtr8g007325	Medtr8g096900		Medtr2g090050	Medtr4g428370	Medtr8g015970
Medtr6g007370	Medtr5g081630	MT4Noble_021783		Medtr4g072910	Medtr8g031980	Medtr5g086945
Medtr8g018550	Medtr4g127510	Medtr8g075600		Medtr8g095020	Medtr8g023400	Medtr4g120340
MT4Noble_051617	Medtr2g091315	Medtr2g105760		Medtr5g099230	Medtr2g073050	Medtr7g112430
Medtr2g104630	Medtr7g112130	Medtr0433s0040		Medtr3g031000	Medtr1g021915	Medtr1g028080
Medtr5g037950	Medtr5g090740	Medtr4g026030		Medtr7g033710	Medtr0618s0020	Medtr7g075885
Medtr7g093010	Medtr4g118790	Medtr1g040430		MT4Noble_029264	Medtr8g009300	Medtr3g449250
Medtr8g022950	Medtr1g088660	Medtr7g010160		Medtr5g054780	Medtr4g094440	Medtr6g092970
Medtr5g073880	Medtr2g074955	Medtr1g081620		Medtr1g030580	Medtr6g033800	Medtr4g103920
Medtr7g407140	Medtr4g021755	Medtr5g083270		Medtr5g025800	Medtr4g103840	Medtr4g055420
Medtr5g063200	Medtr2g039320	Medtr7g084720		Medtr8g033400	Medtr3g031490	Medtr4g019090
Medtr3g107755	Medtr3g025830	Medtr5g081530		Medtr4g077190	Medtr4g049420	MT4Noble_022590
Medtr6g006930	Medtr2g451540	Medtr7g088530		Medtr1g026870	Medtr1g031470	Medtr8g005870
Medtr6g038910	Medtr3g102100	Medtr2g072590		Medtr2g063510	Medtr8g019260	Medtr4g076870
Medtr3g105320	Medtr7g056420	Medtr4g037145		Medtr3g078570	Medtr8g015340	Medtr6g078480
Medtr3g019530	Medtr1g010150	Medtr7g116940		Medtr7g077420	Medtr6g083020	Medtr5g026810
Medtr7g075390	Medtr2g034880	Medtr8g098510		Medtr1g022315	Medtr2g093840	Medtr3g090760
Medtr2g070070	Medtr2g031390	Medtr1g111450		Medtr4g062270	MT4Noble_000745	Medtr4g100820
Medtr0117s0040	Medtr1g108990	Medtr6g065430		Medtr4g054980	Medtr8g068470	Medtr4g067110
Medtr4g087490	Medtr3g028495	Medtr5g045000		Medtr2g029830	Medtr1g028370	Medtr4g011340
Medtr1g099150	Medtr4g060790	Medtr0009s0120		Medtr8g052080	Medtr4g073040	Medtr8g052420
Medtr4g080060	Medtr3g111800	Medtr2g007150		Medtr1996s0010	MT4Noble_015318	Medtr5g095910
Medtr8g099725	MT4Noble_011865	Medtr4g485640		Medtr8g061960	Medtr1g107375	Medtr3g058400
MT4Noble_013488	Medtr2g090865	Medtr0011s0290		Medtr3g106775	Medtr4g046737	Medtr3g107470
Medtr7g118010	Medtr2g029860	Medtr4g069770		Medtr3g073100	Medtr4g075980	Medtr0311s0030
Medtr4g120300	Medtr2g024030	Medtr8g080200		Medtr1g093060	Medtr6g086390	Medtr4g103340
Medtr3g083540	Medtr4g015680	Medtr4g053120		Medtr2g090020	Medtr3g095340	Medtr5g059880
Medtr8g469790	Medtr3g054360	Medtr7g104905		Medtr8g055930	Medtr3g074860	Medtr4g061670
Medtr0202s0070	Medtr5g041310	Medtr4g100840		Medtr2g021260	Medtr2g105680	Medtr3g095020
Medtr3g498695	Medtr7g018320	Medtr8g072640		Medtr4g073690	Medtr8g104645	Medtr1g060790
Medtr4g011600	Medtr8g099320	Medtr4g134760		Medtr3g491900	Medtr2g079300	Medtr2g085085
Medtr3g064500	Medtr5g046110	Medtr3g054040		Medtr8g027955	Medtr4g017720	Medtr2g014770
Medtr3g088465	Medtr5g039390	MT4Noble_019284		Medtr8g097380	Medtr7g062940	Medtr2g022910
Medtr4g132963	Medtr3g099040	Medtr4g010330		Medtr7g082180	Medtr5g006470	Medtr5g097180
Medtr4g052350	Medtr5g038460	Medtr8g059615		Medtr1g113960	Medtr7g015310	Medtr5g016540
Medtr4g126170	Medtr4g060480	Medtr4g013385		Medtr3g111210	Medtr4g088055	Medtr3g435530
Medtr5g026640	Medtr5g082490	Medtr4g050420		Medtr8g093100	Medtr7g063560	Medtr7g106650
Medtr0459s0020	Medtr4g083070	Medtr1g035570		Medtr1g027830	Medtr1g101330	Medtr6g033410
Medtr5g031180	Medtr6g016420	Medtr3g064480		Medtr3g092720	Medtr1g076430	Medtr7g030060
MT4Noble_032604	Medtr7g028870	Medtr8g089310		Medtr7g020820	Medtr3g087740	Medtr3g098460
Medtr3g064600	MT4Noble_027449	Medtr4g011550		Medtr4g074670	Medtr4g088170	Medtr7g085800
Medtr1g111310	Medtr4g128260	Medtr6g029250		Medtr2g006870	Medtr8g019110	Medtr5g005120
Medtr3g069420	Medtr1g026970	Medtr7g405740		Medtr2g073510	Medtr5g092990	Medtr5g082480
Medtr4g105090	Medtr6g071210	Medtr2g100670		Medtr3g088790	Medtr2g084875	Medtr4g116410
Medtr1g022465	Medtr2g021690	Medtr4g045767		Medtr2g100640	Medtr5g021180	Medtr3g058870
Medtr4g118320	Medtr7g022810	Medtr6g084580		Medtr4g113345	Medtr8g087450	Medtr8g059345
MT4Noble_014722	Medtr4g025830	Medtr4g099400		Medtr7g078730	Medtr7g117200	Medtr6g069420
Medtr1g016780	Medtr3g088150	Medtr5g008710		Medtr8g075780	Medtr1360s0010	Medtr2g081580
Medtr5g047390	Medtr3g085300	Medtr7g034405		Medtr2g102450	MT4Noble_056626	Medtr7g117050
Medtr4g129890	Medtr1749s0010	Medtr3g074830		Medtr7g007320	Medtr5g020740	Medtr1g102900
Medtr4g098450	Medtr2g073190	Medtr8g064930		Medtr4g122800	Medtr4g059670	Medtr7g076270
Medtr6g007530	Medtr5g066760	Medtr8g096780		Medtr3g449390	Medtr8g068490	Medtr5g083300
Medtr4g088855	Medtr4g057493	Medtr8g079110		Medtr1g089500	Medtr3g064090	Medtr0194s0040
Medtr4g011370	Medtr7g068770	Medtr4g125890		Medtr8g062140	Medtr8g088780	Medtr7g116710
Medtr3g073670	Medtr5g021240	Medtr3g449970		Medtr3g098160	Medtr5g055310	Medtr4g086170
Medtr1g070470	Medtr4g033275	Medtr8g005205		Medtr2086s0010	Medtr4g088195	Medtr5g033800
Medtr6g048310	Medtr4g011110	Medtr2g033820		Medtr4g114930	Medtr7g090970	Medtr5g026790
Medtr0684s0010	Medtr3g011910	Medtr5g081560		Medtr1g051810	Medtr7g108735	Medtr1g090693
Medtr8g028435	Medtr6g080430	Medtr3g035130		Medtr4g091370	Medtr1g009030	Medtr7g017570
Medtr5g459310	Medtr8g087660	Medtr5g084680		Medtr8g105740	Medtr2g100290	Medtr1g028510
Medtr2g093180	Medtr7g112760	Medtr1g090050		MT4Noble_047929	Medtr3g466200	Medtr4g071590
Medtr6g083290	Medtr7g059400	Medtr7g085810		Medtr7g053500	Medtr2g095800	Medtr3g082690
MT4Noble_019550	Medtr3g028480	Medtr3g097080		Medtr5g090900	Medtr6g071925	Medtr5g020890
Medtr6g007763	Medtr7g093950	Medtr1g022125		Medtr8g093540	Medtr2g015270	Medtr3g064840
Medtr1g080210	Medtr1g110820	Medtr2g087080		Medtr7g061840	Medtr1g101280	Medtr1g110870
Medtr5g024770	Medtr4g098800	Medtr8g099995		Medtr6g033460	Medtr2g012520	Medtr5g075240
Medtr0008s0470	Medtr4g074210	Medtr2g437560		Medtr5g009130	Medtr8g104655	Medtr7g116600
Medtr7g089780	Medtr8g089440	Medtr6g042090		Medtr5g025100	Medtr6g033740	Medtr7g102980
Medtr4g132940	Medtr4g022570	Medtr4g071040		Medtr4g072660	Medtr0286s0050	Medtr4g032670
Medtr4g081640	Medtr6g045290	Medtr1g014240		Medtr4g123730	Medtr8g063120	Medtr3g021000
Medtr7g117350	Medtr7g096830	Medtr8g038730		Medtr3g075410	Medtr2g078350	Medtr4g130210
Medtr1g102190	MT4Noble_001503	Medtr1g090150		Medtr1g076500	Medtr3g031600	Medtr4g058840
Medtr2g102243	Medtr3g079420	Medtr3g088835		Medtr3g115450	Medtr8g087460	Medtr4g007910
Medtr2g035430	Medtr6g069660	Medtr1g059840		Medtr5g071360	Medtr5g006750	Medtr1g021740
Medtr4g080750	Medtr7g075600	MT4Noble_018653		Medtr3g106430	Medtr8g469850	Medtr4g112370
Medtr7g080550	Medtr7g094880	Medtr2g090120		Medtr7g066730	Medtr6g452730	Medtr7g105630
Medtr5g032420	Medtr3g072110	Medtr5g065930		Medtr0242s0030	Medtr5g018910	Medtr2g018870
Medtr5g098510	Medtr3g034180	Medtr8g102590		Medtr5g017810	Medtr8g088970	Medtr4g036815
Medtr4g025130	Medtr1g045930	Medtr1g109310		Medtr1g024930	Medtr2g094210	Medtr3g020330
Medtr3g452790	Medtr8g091660	Medtr2g104910		Medtr2g076670	Medtr0349s0020	Medtr1g066860
Medtr7g100540	Medtr3g080500	Medtr4g052950		Medtr3g060880	Medtr7g089640	Medtr6g006060
Medtr8g030700	Medtr5g096780	Medtr2g005590		Medtr1g008600	Medtr1g043410	Medtr8g092630
Medtr1g031580	Medtr7g018810	Medtr1g073840		Medtr8g018890	Medtr8g027965	Medtr2g011720
Medtr6g038410	Medtr2g101610	Medtr8g074040		Medtr1g029690	Medtr8g432350	Medtr1g027950
Medtr4g117890	Medtr7g088470	Medtr6g025610		Medtr2g040060	Medtr6g074620	Medtr7g084160
Medtr5g091660	Medtr5g037080	Medtr2g073540		Medtr5g083110	Medtr2g030530	Medtr4g057845
Medtr8g037310	Medtr7g095640	Medtr7g025610		Medtr3g084160	Medtr8g089920	Medtr6g083310
Medtr5g096840	Medtr5g012680	MT4Noble_051320		Medtr8g091590	Medtr1g046850	Medtr3g116860
Medtr1g077140	Medtr5g012660	Medtr6g055960		Medtr4g127490	Medtr6g075390	Medtr3g063250
Medtr3g020880	Medtr2g438560	Medtr3g011280		MT4Noble_007768	Medtr1395s0010	Medtr1g026950
Medtr4g097360	Medtr2g018125	Medtr7g106830		Medtr7g022440	MT4Noble_026001	Medtr7g108650
Medtr1g009570	Medtr6g005070	Medtr8g095390		Medtr4g088490	Medtr5g035750	Medtr8g015570
Medtr5g065080	Medtr3g118390	Medtr1g100797		Medtr8g068330	Medtr6g082860	Medtr8g037315
Medtr5g008325	Medtr3g096330	Medtr0340s0020		Medtr1g085240	Medtr5g087320	Medtr4g064770
Medtr8g465380	Medtr8g102550	Medtr4g019800		Medtr8g096780	Medtr1g096270	Medtr8g099450
Medtr3g110108	Medtr4g132810	MT4Noble_005105		Medtr3g058610	MT4Noble_005514	Medtr4g081520
Medtr7g451040	Medtr2g023430	Medtr6g015310		Medtr7g079040	Medtr1g112200	Medtr6g077750
Medtr3g075260	Medtr2g101590	Medtr5g087620		Medtr1g063940	Medtr5g073750	Medtr3g115330
Medtr3g089055	Medtr4g134090	Medtr2g069770		Medtr6g083920	Medtr8g019280	Medtr2g085210
Medtr4g109830	Medtr1g010170	MT4Noble_004195		Medtr4g094982	Medtr2g098890	Medtr8g016320
Medtr5g056160	Medtr5g012260	Medtr1g115535		Medtr4g088515	Medtr3g016255	Medtr1g043450
Medtr3g048440	Medtr7g022310	Medtr2g018600		Medtr7g007280	Medtr2g029820	Medtr4g107220
Medtr5g026380	Medtr1g080700	Medtr3g006690		Medtr1g077460	Medtr6g082850	Medtr2g036490
Medtr5g006720	Medtr2g007960	Medtr8g027255		Medtr8g072950	Medtr5g006710	Medtr3g076660
Medtr7g056450	Medtr7g023560	Medtr7g107270		Medtr3g498825	Medtr8g062770	Medtr6g016050
Medtr5g049250	Medtr6g005210	Medtr8g101560		Medtr5g095740	MT4Noble_045837	Medtr1g016010
Medtr6g488260	Medtr4g054920	Medtr1g100910		Medtr4g058990	Medtr3g016250	Medtr7g056613
Medtr8g006710	Medtr3g031830	Medtr2g049640		Medtr8g097200	Medtr7g091290	Medtr4g070030
Medtr3g086640	Medtr5g009500	Medtr5g034240		Medtr1g030450	Medtr3g093780	Medtr6g465460
Medtr3g012090	Medtr5g096700	Medtr0015s0140		Medtr6g011680	Medtr1g026740	Medtr7g083640
Medtr1g045065	Medtr8g043970	Medtr7g091690		Medtr5g017980	Medtr1g110290	Medtr4g023070
Medtr4g019150	Medtr8g107640	Medtr8g442420		Medtr8g105930	Medtr8g020940	Medtr2g018990
Medtr1g044670	Medtr6g029460	Medtr6g025750		Medtr8g092340	Medtr4g485630	Medtr3g020880
Medtr4g029550	Medtr7g405830	Medtr4g079140		Medtr1g101015	Medtr8g019290	Medtr4g134670
Medtr8g094150	Medtr1g105555	Medtr8g056020		Medtr5g036480	Medtr2g037150	Medtr3g104950
Medtr4g099120	Medtr7g072410	Medtr6g072250		Medtr1g090070	Medtr4g019790	Medtr4g065610
Medtr7g114240	Medtr0053s0030	Medtr8g096860		Medtr1g096580	Medtr4g088190	MT4Noble_055725
Medtr1g063210	Medtr3g022260	Medtr3g028010		Medtr6g016875	Medtr2g089650	Medtr1g112270
Medtr4g037580	Medtr8g487710	Medtr2g095880		MT4Noble_015143	Medtr4g097790	Medtr7g117970
Medtr5g011780	Medtr7g083570	Medtr7g085220		Medtr7g021720	Medtr4g059790	Medtr1g107565
Medtr3g043900	Medtr6g007210	Medtr8g104200		Medtr1g093650	Medtr1g056910	Medtr4g117980
Medtr4g097280	Medtr1g012610	Medtr4g100630		Medtr7g085810	Medtr1g096260	Medtr4g021350
Medtr5g035080	Medtr5g043000	Medtr4g028140		Medtr1g007630	Medtr6g033805	Medtr1g040020
Medtr5g056040	Medtr3g033520	Medtr4g110090		Medtr1g032610	Medtr1g008140	Medtr5g033820
Medtr1g026110	Medtr6g015975	Medtr7g092680		Medtr3g045180	Medtr7g078640	Medtr1g008310
Medtr6g027660	Medtr5g070350	Medtr6g053680		Medtr4g071210	Medtr5g086550	Medtr6g005760
Medtr6g018315	Medtr8g011160	Medtr2g096300		Medtr8g086320	Medtr6g033855	Medtr4g023550
Medtr2g086420	Medtr8g089480	Medtr1g095145		Medtr1g054335	Medtr6g072290	Medtr6g027770
Medtr4g053420	Medtr4g118780	Medtr5g033690		Medtr5g066320	Medtr8g104580	Medtr1g029350
Medtr4g077707	Medtr8g019320	Medtr4g133170		Medtr4g119050	Medtr3g020280	Medtr0460s0010
Medtr3g109310	Medtr6g033330	Medtr2g013550		Medtr3g069720	Medtr2g102680	Medtr4g077880
Medtr2g084805	Medtr5g064040	Medtr7g095450		Medtr5g036180	Medtr3g105790	Medtr6g072510
Medtr1g027070	Medtr8g463280	Medtr5g034500		Medtr2g033880	Medtr5g063740	Medtr1g027930
Medtr3g060740	Medtr1g086080	Medtr2g021800		Medtr6g023770	Medtr5g077760	Medtr1g046510
Medtr4g063935	Medtr2g096540	Medtr8g070770		Medtr2g090060	Medtr7g101395	Medtr4g015540
Medtr1g018640	Medtr7g076707	Medtr8g464480		Medtr5g017070	Medtr2g101320	Medtr8g098445
Medtr2g040570	Medtr6g465300	Medtr4g052970		Medtr5g018770	Medtr5g083360	Medtr8g054450
Medtr2g101500	Medtr1g019750	MT4Noble_046378		Medtr1g053835	Medtr6g014220	Medtr6g016295
Medtr4g107580	Medtr0004s0650	Medtr3g084110		Medtr6g074780	Medtr7g101290	Medtr3g065480
Medtr2g016200	Medtr5g092910	Medtr3g081150		Medtr2g022460	Medtr4g038400	Medtr5g015050
Medtr3g087700	Medtr1g029840	Medtr6g090460		Medtr4g050850	MT4Noble_040099	Medtr1g059080
Medtr7g079720	Medtr7g068290	Medtr5g045945		Medtr5g075340	Medtr0251s0050	Medtr2g082640
Medtr3g076950	Medtr8g042770	Medtr6g477860		Medtr7g106900	Medtr7g084300	Medtr1g026310
Medtr3g072300	Medtr8g487730	Medtr2g083180		Medtr1g073320	Medtr4g018970	Medtr3g106310
Medtr0691s0020	Medtr7g022870	Medtr2g068850		Medtr4g129560	Medtr6g406250	Medtr1g082380
Medtr2g019160	Medtr1g037690	Medtr6g013485		Medtr2g026685	Medtr5g086570	Medtr4g115460
Medtr5g072860	Medtr5g096410	Medtr6g071895		MT4Noble_032667	Medtr5g082460	Medtr3g115400
Medtr1g111640	Medtr8g028920	Medtr1g054600		Medtr8g022280	Medtr4g006010	Medtr1g038840
Medtr0294s0020	Medtr7g111240	Medtr5g013150		Medtr8g045695	Medtr8g047230	Medtr5g015850
Medtr5g022690	Medtr7g072875	Medtr4g007710		Medtr3g116380	Medtr3g045040	Medtr5g068740
Medtr6g075950	MT4Noble_045500	Medtr5g007330		Medtr5g036210	Medtr6g038820	Medtr4g095660
Medtr1g111630	Medtr7g112870	Medtr8g028080		Medtr4g081180	Medtr7g092580	Medtr4g078760
Medtr2g081520	Medtr7g063540	Medtr8g027725		Medtr8g099420	Medtr7g071820	Medtr6g007763
Medtr1g098925	Medtr3g014180	Medtr1g083395		Medtr2g020750	Medtr6g033760	Medtr5g083010
Medtr3g112220	Medtr3g105595	Medtr5g029900		Medtr3g071320	Medtr4g061130	Medtr6g024235
Medtr4g063895	Medtr2g089815	Medtr4g108230		Medtr1g093350	Medtr7g068780	Medtr1g031620
Medtr2g026590	Medtr7g117550	Medtr7g016640		Medtr6g033260	Medtr8g036235	Medtr7g065720
Medtr3g087360	Medtr4g086260	Medtr2g027240		Medtr8g102340	MT4Noble_045139	MT4Noble_027462
Medtr6g052990	Medtr2g069470	Medtr4g083540		Medtr8g098575	Medtr1g021638	Medtr6g075870
Medtr3g022250	Medtr3g108500	Medtr5g071250		Medtr4g128570	Medtr1g074370	Medtr8g028125
Medtr3g072000	Medtr5g066330	Medtr2g087295		Medtr3g100580	Medtr4g094275	Medtr4g101880
Medtr3g069400	Medtr8g013830	Medtr2g086890		Medtr1g076270	Medtr3g106585	Medtr8g080360
Medtr2g041090	Medtr3g021340	Medtr4g014360		Medtr8g021233	Medtr5g013530	Medtr5g019760
Medtr4g019580	Medtr2g105080	Medtr2g013900		Medtr3g067825	Medtr8g044140	Medtr0012s0150
Medtr2g097220	Medtr8g089560	MT4Noble_034535		Medtr6g068790	Medtr5g011370	Medtr3g031480
Medtr4g081655	Medtr3g088470	Medtr1g100777		Medtr6g081040	Medtr8g018690	Medtr4g008840
Medtr8g063200	Medtr1g111470	Medtr4g072250		Medtr1g083750	Medtr4g104140	Medtr4g077250
Medtr5g048560	Medtr2g008980	Medtr3g099100		MT4Noble_024309	Medtr1g100230	Medtr4g030060
Medtr3g061090	Medtr4g026485	Medtr4g108830		Medtr8g028695	Medtr7g007620	Medtr6g037370
Medtr1g088795	Medtr7g077660	MT4Noble_008799		Medtr8g059295	Medtr3g117370	Medtr5g037410
Medtr5g096320	Medtr6g006190	Medtr4g094848		Medtr6g090460	Medtr7g012550	Medtr4g092440
Medtr5g035310	Medtr3g078320	Medtr1g015730		Medtr5g464770	Medtr8g091390	Medtr3g027030
Medtr1g075480	Medtr1g067410	Medtr2g426020		Medtr3g079180	Medtr7g067380	Medtr5g054360
Medtr5g035665	Medtr4g051515	Medtr0400s0020		Medtr2g037830	Medtr2g095080	Medtr4g130300
Medtr0374s0050	Medtr7g107710	Medtr2g100930		Medtr4g012490	Medtr8g104510	Medtr2g073070
Medtr8g104460	Medtr8g059485	Medtr7g056410		Medtr3g084180	Medtr3g090860	Medtr2g060520
Medtr4g074465	Medtr7g113030	Medtr0268s0080		Medtr5g075160	Medtr4g051715	Medtr3g015440
Medtr3g030080	Medtr5g071990	Medtr5g096495		Medtr4g132110	Medtr3g437820	Medtr8g046290
Medtr1g108460	Medtr4g134290	Medtr5g077080		Medtr3g084200	Medtr3g082210	Medtr5g018590
Medtr4g111770	Medtr8g088170	Medtr4g068950		Medtr7g012000	Medtr6g036490	Medtr4g113140
Medtr3g467100	MT4Noble_057126	Medtr1g041475		Medtr4g092780	Medtr5g023660	Medtr2g032040
Medtr8g103700	Medtr7g103560	Medtr8g089765		Medtr1g054285	Medtr0019s0120	Medtr6g007490
Medtr2g041170	Medtr6g004430	Medtr3g087160		Medtr3g117880	Medtr4g118760	Medtr2g098240
Medtr4g020640	Medtr2g073250	Medtr2g009980		Medtr5g043190	Medtr3g110175	Medtr5g025090
Medtr8g009980	Medtr8g030850	Medtr5g076240		Medtr8g083220	Medtr1g010250	Medtr4g113710
Medtr7g094190	Medtr4g024000	Medtr5g087940		Medtr4g022800	Medtr6g082190	Medtr3g092710
Medtr0115s0020	Medtr1750s0010	Medtr2g058520		Medtr5g064035	Medtr7g071790	Medtr3g092260
Medtr8g031250	Medtr3g105605	Medtr1g012520		Medtr8g069350	Medtr7g068190	Medtr4g081230
Medtr7g090020	Medtr8g085760	Medtr1g015650		Medtr5g015880	Medtr1g012950	Medtr8g446430
Medtr7g090035	Medtr7g100650	Medtr5g040710		Medtr2g078020	Medtr1g034300	Medtr8g099765
Medtr8g009870	Medtr7g075463	Medtr5g011640		Medtr1g018830	Medtr7g105970	Medtr2g015390
Medtr5g048050	Medtr1g073950	Medtr8g085700		Medtr6g086170	Medtr1g014070	Medtr2g017420
Medtr8g038880	Medtr1g029550	Medtr1g109470		Medtr4g072300	Medtr4g059780	Medtr4g019080
Medtr2g426060	Medtr6g092430	Medtr2g014260		Medtr8g099920	Medtr6g073013	Medtr1g061240
Medtr7g115360	Medtr3g077870	Medtr7g082500		Medtr3g080000	Medtr2g055400	Medtr2g096610
Medtr8g014860	Medtr7g029020	Medtr1g100070		Medtr3g092930	Medtr6g026820	Medtr1g031740
Medtr4g102890	Medtr6g027480	Medtr8g469260		Medtr1g057280	Medtr1g110130	Medtr4g022720
Medtr0054s0080	Medtr5g092140	Medtr4g103565		Medtr2g104900	Medtr2g017950	Medtr8g461380
Medtr3g099750	Medtr7g087410	Medtr2g021720		Medtr5g027460	Medtr1457s0010	Medtr5g006780
Medtr1g023920	Medtr8g012180	Medtr2g045420		Medtr5g019120	Medtr3g025260	Medtr5g011440
Medtr4g101380	Medtr4g071150	Medtr6g088250		Medtr2g094410	Medtr6g464720	Medtr8g093880
Medtr3g077570	Medtr5g082110	Medtr6g086280		Medtr3g103500	Medtr8g099485	Medtr2g062990
Medtr4g124770	MT4Noble_000265	Medtr0542s0020		Medtr1g096430	Medtr2g033980	Medtr4g068780
Medtr8g024050	Medtr2g017925	Medtr3g111120		Medtr4g072480	Medtr3g015830	Medtr8g066630
Medtr3g016080	Medtr3g054010	Medtr8g017210		Medtr3g096150	Medtr8g093460	Medtr8g016440
Medtr8g032000	Medtr1g083620	Medtr3g108808		Medtr3g072400	Medtr4g060950	Medtr4g029720
Medtr3g491840	Medtr8g087680	Medtr7g107040		Medtr1g006990	Medtr3g111460	Medtr8g092060
Medtr6g026800	Medtr1g010130	Medtr0365s0010		Medtr2g021480	Medtr7g074880	Medtr8g014020
Medtr1g064560	Medtr6g065650	Medtr7g081020		Medtr3g109800	Medtr5g015590	Medtr7g104220
Medtr5g041350	Medtr8g442270	Medtr8g096700		Medtr4g072890	Medtr5g092300	Medtr4g095430
Medtr6g022180	Medtr8g092000	Medtr6g015350		Medtr2g090015	Medtr3g082250	Medtr8g089665
Medtr4g120020	Medtr1g032190	Medtr2g029125		Medtr3g110405	Medtr3g465950	Medtr4g094398
Medtr8g024680	MT4Noble_053083	Medtr4g123600		Medtr2g009480	Medtr3g110172	Medtr2g039770
Medtr2g035900	Medtr4g043650	Medtr2g097010		Medtr4g119030	Medtr3g088705	Medtr4g471590
Medtr2g035405	Medtr3g437870	Medtr4g093850		Medtr7g086030	Medtr3g052820	Medtr7g118060
Medtr8g074120	Medtr3g091290	Medtr4g088225		Medtr3g100770	Medtr2g023860	Medtr3g464720
Medtr4g088150	Medtr1g013440	Medtr3g013970		Medtr3g080390	Medtr3g031510	Medtr2g099010
Medtr4g115920	Medtr4g101730	Medtr6g016990		Medtr4g119040	Medtr2g054750	Medtr5g055940
Medtr4g119780	Medtr3g089020	Medtr3g117530		Medtr5g074150	Medtr1g077930	MT4Noble_047982
Medtr4g058970	Medtr4g064120	Medtr2g043250		Medtr8g063470	Medtr6g049260	Medtr2g035070
Medtr1g021635	Medtr7g079420	Medtr1g054175		Medtr1g035720	Medtr5g027020	Medtr4g064820
Medtr8g089110	Medtr1g080890	Medtr8g089770		Medtr6g028030	Medtr4g092520	Medtr0067s0010
Medtr3g086670	Medtr1g067150	MT4Noble_056928		Medtr1g027020	Medtr3g096450	Medtr0001s0490
Medtr0318s0020	Medtr1g047740	Medtr1g090667		Medtr4g072280	MT4Noble_009052	Medtr5g018390
Medtr6g007690	Medtr1g016100	Medtr4g068220		Medtr1g094085	Medtr3g031640	Medtr4g132320
Medtr1g063240	Medtr3g098310	Medtr3g435130		Medtr8g075330	Medtr5g079290	Medtr8g016120
Medtr5g095630	Medtr5g035090	Medtr5g041930		Medtr4g122740	Medtr5g036570	Medtr7g101130
Medtr7g094710	Medtr7g072630	Medtr4g081500		Medtr5g054730	Medtr4g082040	Medtr1g115500
Medtr7g114550	Medtr8g028140	Medtr2g022950		Medtr8g066860	Medtr3g065370	Medtr4g036575
Medtr5g044680	Medtr8g073710	Medtr4g094860		Medtr3g065140	Medtr3g052810	Medtr2g450550
Medtr6g091710	Medtr1g076800	Medtr1g113850		Medtr4g108260	Medtr0160s0030	Medtr5g053940
Medtr1g034140	Medtr1g014690	Medtr8g080470		Medtr8g067590	Medtr4g076470	Medtr2g020060
MT4Noble_051644	Medtr3g085060	Medtr2g025470		Medtr0001s0120	Medtr1g029380	Medtr7g099260
Medtr1g061710	Medtr2g426070	Medtr6g053510		Medtr8g063490	Medtr0391s0020	Medtr3g031790
Medtr3g091350	Medtr1g111400	Medtr2g098440		Medtr3g006740	Medtr5g027390	Medtr2g436470
Medtr2g105330	Medtr4g011090	Medtr7g061330		Medtr1g090853	Medtr3g031610	Medtr3g068175
Medtr6g009070	Medtr1g073360	Medtr2g449870		Medtr3g084170	Medtr8g087710	Medtr0339s0030
Medtr3g109880	Medtr8g061120	Medtr1g012690		Medtr3g069730	Medtr6g059730	Medtr3g020560
Medtr4g088935	Medtr7g065880	Medtr5g013690		Medtr2g071740	Medtr6g088565	Medtr3g095490
Medtr3g083150	Medtr3g110320	Medtr5g430360		Medtr7g006450	Medtr1g088940	Medtr4g094725
Medtr3g111590	Medtr4g126770	Medtr3g064350		Medtr2g012800	Medtr4g011270	Medtr4g114690
Medtr6g039820	Medtr3g113920	Medtr4g098710		Medtr1g015300	Medtr0197s0010	Medtr4g095042
Medtr3g067615	Medtr4g011460	MT4Noble_010821		Medtr3g103510	MT4Noble_048378	Medtr8g085740
Medtr8g092190	Medtr2g099950	Medtr0137s0060		Medtr6g011440	Medtr7g073430	Medtr4g120020
Medtr1g075640	Medtr4g057500	Medtr7g066250		Medtr2g450310	Medtr7g033150	Medtr8g028120
Medtr7g076660	Medtr8g096850	Medtr5g047220		Medtr8g102150	Medtr8g098860	Medtr3g101230
MT4Noble_037073	Medtr1g084140	Medtr4g014570		Medtr7g103050	Medtr7g117475	Medtr5g070040
Medtr1g111550	Medtr2g041960	Medtr3g088535		Medtr2g059590	Medtr8g066920	Medtr7g059460
Medtr3g116240	Medtr6g078190	Medtr2g078870		Medtr7g070100	Medtr4g428420	Medtr8g009640
Medtr7g085790	Medtr1g073180	Medtr5g093890		Medtr3g105210	Medtr5g063080	Medtr3g109880
Medtr2g064495	Medtr8g090095	Medtr4g100970		MT4Noble_030257	Medtr1g041815	Medtr8g086410
Medtr1g034130	Medtr1g088180	Medtr8g107620		Medtr5g019680	Medtr8g087470	Medtr5g043645
Medtr6g040230	Medtr2g061710	Medtr8g078480		Medtr1g069470	Medtr8g089000	Medtr4g064807
Medtr6g033295	Medtr1g083580	Medtr8g091995		Medtr3g111150	Medtr1g086550	Medtr3g101340
Medtr7g102260	Medtr4g131400	Medtr6g044400		Medtr8g098510	Medtr3g081130	Medtr3g099180
Medtr4g081730	Medtr3g058930	Medtr7g107000		Medtr7g029345	Medtr7g070390	Medtr8g027770
Medtr5g011070	Medtr6g087290	Medtr7g095960		Medtr8g107470	Medtr2g088060	Medtr3g466250
Medtr2g031350	Medtr0578s0010	Medtr0268s0070		Medtr1g109350	Medtr3g010770	Medtr5g009970
Medtr4g097350	Medtr1g059890	Medtr5g024150		Medtr3g110330	Medtr2g032560	MT4Noble_044494
Medtr4g121930	Medtr5g035760	Medtr3g109690		Medtr3g063050	Medtr6g075790	Medtr4g088320
Medtr1g022135	Medtr8g063460	Medtr2g073420		Medtr7g084690	Medtr6g016810	Medtr3g051110
Medtr3g040800	Medtr1g080250	Medtr1g110230		Medtr2g012850	Medtr1g104800	Medtr1g052560
Medtr5g023240	Medtr8g096970	Medtr2g026685		Medtr5g097420	Medtr4g059840	Medtr3g064687
Medtr4g124360	Medtr1g041895	Medtr5g070030		MT4Noble_050771	Medtr4g112630	Medtr7g018850
Medtr1g484930	Medtr2g079990	Medtr3g450410		Medtr4g102740	Medtr4g070090	Medtr7g103870
	Medtr3g048760	Medtr8g067470		Medtr4g072610	Medtr4g117330	Medtr1g031460
	Medtr0018s0320	Medtr6g016130		Medtr1g030840	Medtr2g096360	Medtr4g029600
	Medtr4g095310	Medtr8g072790		Medtr1g088910	Medtr7g102940	Medtr1g060010
	Medtr2g034480	Medtr3g115040		Medtr3g466790	Medtr7g076920	Medtr1g027060
	Medtr5g034990	Medtr1g067650		Medtr8g016230	Medtr4g113840	Medtr8g018270
	Medtr1g022485	Medtr1g110790		Medtr5g026130	MT4Noble_020906	Medtr8g089980
	Medtr3g114840	Medtr6g060860		Medtr1g099825	Medtr1g090370	Medtr1g071110
	Medtr5g091060	Medtr5g025825		Medtr7g077215	Medtr3g112460	Medtr1g027960
	Medtr8g107450	Medtr5g011470		Medtr7g111890	Medtr4g122130	Medtr8g093770
	Medtr2g018590	Medtr1g067460		Medtr4g049390	Medtr5g089580	MT4Noble_010229
	Medtr5g062320	MT4Noble_037998		Medtr1g035360	Medtr4g009590	Medtr3g101700
	Medtr4g107940	Medtr8g089370		Medtr1g081240	Medtr7g086090	Medtr7g074570
	Medtr3g106550	Medtr8g079910		Medtr8g101670	Medtr5g093520	Medtr6g452490
	Medtr7g073370	Medtr3g105880		Medtr4g073810	Medtr2g022700	Medtr8g039070
	Medtr8g091530	Medtr2g034750		Medtr3g071740	Medtr7g093040	Medtr7g091140
	Medtr8g106695	Medtr1g095165		Medtr4g129690	Medtr8g092020	Medtr8g032940
	Medtr1g086940	Medtr7g112350		Medtr5g085730	Medtr5g009140	Medtr6g037340
	Medtr8g035890	Medtr7g461410		Medtr7g028465	Medtr3g099500	MT4Noble_054194
	Medtr2g062820	Medtr3g452880		Medtr1g029800	Medtr5g081900	Medtr2g064310
	Medtr2g096690	Medtr1g108610		Medtr5g027550	Medtr5g032600	Medtr3g103020
	Medtr7g451440	Medtr2g033080		Medtr6g464620	Medtr1g100130	Medtr3g079330
	Medtr3g107720	Medtr4g046680		Medtr4g062470	Medtr8g016650	Medtr3g048270
	Medtr5g011540	Medtr1g061050		MT4Noble_046884	Medtr8g076160	Medtr5g044270
	Medtr6g087300	Medtr7g078680		Medtr1g023170	Medtr4g082310	Medtr4g061920
	Medtr6g088500	Medtr1g018830		Medtr3g065300	Medtr4g131180	Medtr1g066970
	Medtr1g062090	MT4Noble_037110		Medtr4g009030	Medtr3g113050	Medtr7g096870
	Medtr6g071040	Medtr4g028130		Medtr6g034230	Medtr3g479600	Medtr8g102710
	Medtr6g011310	Medtr1g100090		Medtr4g064560	Medtr8g037150	Medtr1g031510
	Medtr1g050538	Medtr6g025065		Medtr3g063010	Medtr3g110420	MT4Noble_042906
	Medtr3g117230	Medtr1g044125		Medtr5g014400	Medtr4g031800	Medtr5g031250
	Medtr8g076680	Medtr6g004520		Medtr5g005230	Medtr7g100430	Medtr6g072450
	Medtr3g099010	Medtr4g066650		Medtr5g059130	Medtr1g034490	Medtr2g070130
	Medtr3g091090	Medtr2g079430		Medtr3g087270	Medtr3g102810	Medtr4g061827
	Medtr7g108480	Medtr2g039620		Medtr3g094040	Medtr2g010970	Medtr4g125960
	Medtr2g013450	Medtr7g110820		Medtr2g073470	Medtr7g018890	Medtr3g463270
	Medtr4g119840	Medtr2g021480		Medtr3g063040	Medtr2g078240	Medtr3g027140
	Medtr4g007850	Medtr8g062873		Medtr2g010280	Medtr1g090140	Medtr8g046220
	Medtr6g015575	Medtr8g090215		Medtr4g087970	Medtr4g114340	Medtr8g093750
	Medtr2g007330	Medtr1g109230		Medtr2g078920	Medtr5g076480	Medtr3g007700
	Medtr2g021320	Medtr4g115690		Medtr3g096500	Medtr5g090340	Medtr4g005380
	Medtr4g124190	Medtr0368s0010		Medtr2g055760	Medtr0069s0040	Medtr5g094340
	Medtr3g101777	Medtr3g078020		Medtr7g086110	Medtr5g006130	Medtr5g077280
	Medtr1g022380	Medtr3g452730		Medtr0110s0010	Medtr5g011250	Medtr1g076580
	Medtr6g008800	Medtr7g117100		Medtr1g057810	Medtr4g070670	Medtr8g106580
	Medtr6g025055	Medtr8g010170		Medtr8g086580	Medtr5g014260	Medtr3g070380
	Medtr4g009870	Medtr6g034195		Medtr8g085520	Medtr5g022670	Medtr8g101880
	Medtr5g033940	Medtr3g448380		Medtr1g041605	Medtr4g008530	Medtr7g088210
	Medtr2g016280	Medtr2g461180		Medtr2g070240	Medtr4g055290	Medtr4g013300
	Medtr2g061720	Medtr7g017360		Medtr7g100070	Medtr7g065680	Medtr8g006995
	Medtr1g044135	Medtr7g108540		Medtr1g012630	Medtr4g092590	Medtr3g479510
	Medtr1g032200	Medtr1g067640		Medtr7g110100	Medtr5g055280	Medtr6g005470
	Medtr1g022940	Medtr8g066820		Medtr1g102750	Medtr2g090710	Medtr2g451110
	Medtr6g069685	Medtr4g024940		Medtr4g079500	Medtr6g033820	Medtr2g072790
	Medtr3g088560	Medtr4g006970		Medtr8g046550	Medtr7g071040	Medtr4g134210
	Medtr5g013440	Medtr0051s0090		Medtr7g005400	Medtr8g032770	Medtr7g107420
	Medtr1g040730	Medtr2g086560		Medtr5g040640	Medtr2g064295	Medtr5g017290
	Medtr4g094420	Medtr3g103960		MT4Noble_025786	Medtr6g069830	Medtr7g114750
	Medtr8g102600	Medtr5g080630		Medtr7g110610	Medtr1g492820	Medtr7g011230
	Medtr1g100305	Medtr5g017090		Medtr4g101685	Medtr4g010000	Medtr4g122060
	Medtr4g011900	Medtr7g108680		Medtr8g471000	Medtr5g091340	Medtr8g028145
	Medtr7g089330	Medtr2g096970		Medtr5g055190	Medtr1g013820	Medtr4g122960
	Medtr2g083870	Medtr1g075153		MT4Noble_032974	Medtr6g085010	Medtr4g008630
	Medtr2g013720	Medtr4g065670		Medtr1g026700	Medtr3g023110	Medtr7g083030
	Medtr8g035910	Medtr6g034285		Medtr2g101830	Medtr1g082890	Medtr7g115450
	Medtr3g462330	Medtr5g010040		Medtr2g031750	Medtr7g082640	Medtr5g078780
	Medtr3g065380	Medtr3g107090		Medtr6g043600	Medtr4g059680	Medtr2g014170
	Medtr5g042520	MT4Noble_003610		Medtr4g036030	Medtr1g079763	Medtr6g024240
	Medtr2g103850	Medtr1g082300		MT4Noble_020194	Medtr3g052480	Medtr7g084680
	Medtr8g069283	Medtr4g094898		Medtr8g093040	Medtr2g060070	Medtr7g100720
	Medtr1g066950	Medtr7g444860		Medtr5g042150	Medtr7g079900	Medtr7g100830
	Medtr4g023560	Medtr0279s0030		Medtr8g015450	Medtr6g086510	Medtr1g106875
	Medtr8g079400	Medtr5g082850		Medtr7g106730	Medtr5g012210	Medtr3g053890
	Medtr1g115400	Medtr1g111900		Medtr1g041430	Medtr5g026260	Medtr3g019150
	Medtr8g061230	Medtr6g086300		Medtr7g086240	Medtr8g080880	Medtr5g013640
	Medtr5g021860	Medtr3g109540		Medtr4g121090	Medtr3g111310	Medtr0003s0500
	Medtr7g115570	Medtr5g025330		Medtr7g089940	Medtr2g005810	Medtr8g039190
	Medtr2g010330	Medtr7g108830		Medtr2g436830	Medtr3g115950	Medtr4g074950
	Medtr4g134900	Medtr3g114010		Medtr6g478230	Medtr3g070340	Medtr3g009510
	Medtr6g086485	Medtr5g043705		MT4Noble_024929	Medtr5g010440	Medtr8g067530
	Medtr7g085990	Medtr2g028855		Medtr7g021120	Medtr1g072500	Medtr6g015780
	Medtr3g072500	Medtr7g108535		Medtr3g089140	Medtr3g032530	Medtr1g107350
	Medtr1995s0010	Medtr6g033605		Medtr1g012700	Medtr1g019640	Medtr8g095320
	Medtr3g105610	Medtr7g069580		Medtr3g102390	Medtr3g005460	Medtr7g080170
	Medtr1g039010	Medtr3g092930		Medtr6g034755	Medtr5g005710	Medtr0783s0010
	Medtr4g073580	Medtr4g014490		Medtr3g107380	MT4Noble_043621	Medtr8g470550
	Medtr5g022970	Medtr2g086870		Medtr1g018750	Medtr5g030690	Medtr6g060570
	Medtr3g088655	Medtr1g058350		Medtr3g111020	Medtr3g114030	Medtr1g018205
	Medtr3g028465	Medtr3g091420		Medtr4g019770	Medtr4g016920	Medtr4g107850
	Medtr1g087310	Medtr5g076080		Medtr7g091040	Medtr4g035350	Medtr3g072830
	Medtr5g085850	Medtr4g063710		Medtr1g104520	Medtr4g113290	Medtr4g127290
	Medtr2g094093	Medtr5g018770		Medtr5g095050	Medtr4g078440	Medtr0005s0130
	Medtr4g120220	Medtr7g090500		Medtr2g045320	Medtr2g021255	Medtr7g056403
	Medtr4g076140	Medtr5g080640		Medtr4g087850	Medtr8g078870	Medtr1g070470
	Medtr8g095650	Medtr5g027085		Medtr6g032885	Medtr0110s0030	Medtr7g096980
	Medtr7g068220	Medtr8g074640		Medtr5g012410	Medtr2g437700	Medtr6g012800
	Medtr7g108090	Medtr8g106550		Medtr4g048060	Medtr1g094960	Medtr7g084830
	Medtr5g010100	Medtr2g026030		Medtr8g106800	Medtr3g080170	Medtr6g009455
	Medtr3g058660	Medtr8g039690		Medtr2g075690	Medtr7g007220	Medtr5g092820
	Medtr8g058775	Medtr3g070860		MT4Noble_029227	Medtr4g110140	Medtr4g109980
	Medtr4g084130	Medtr5g004720		Medtr4g117090	Medtr7g111880	Medtr3g086210
	Medtr4g101090	Medtr3g109520		Medtr5g018190	Medtr2g006960	Medtr8g032890
	Medtr8g095470	Medtr8g042040		Medtr8g099115	Medtr2g018690	Medtr5g038570
	Medtr4g057095	Medtr2g082770		Medtr2g078370	Medtr7g088740	Medtr2g041090
	Medtr8g080940	Medtr8g012420			Medtr4g088350	Medtr1g105850
	MT4Noble_015382	Medtr4g055170			MT4Noble_005851	Medtr8g035630
	MT4Noble_035423	Medtr3g087590			Medtr8g031030	Medtr7g078990
	Medtr6g045483	Medtr2g097780			Medtr8g038990	Medtr5g073810
	Medtr7g063670	Medtr1g009640			Medtr7g007200	Medtr3g086640
	Medtr3g084450	Medtr5g004630			Medtr5g026150	Medtr7g116750
	Medtr4g082360	Medtr3g097450			Medtr4g103520	Medtr3g095410
	Medtr8g030733	Medtr2g093100			Medtr2g012750	MT4Noble_036004
	Medtr4g132020	Medtr2g096890			Medtr6g033320	Medtr3g111700
	Medtr5g081740	MT4Noble_055348			Medtr7g090160	Medtr5g020430
	Medtr1g018840	Medtr2g029390			Medtr3g460790	Medtr2g079420
	Medtr5g038590	Medtr2g090950			Medtr3g026110	Medtr3g093470
	Medtr3g087070	Medtr0057s0200			Medtr4g094300	Medtr4g130280
	Medtr8g070520	Medtr1g095910			Medtr5g040340	Medtr1g048030
	Medtr8g080770	Medtr1g034320			Medtr3g046330	Medtr6g008530
	Medtr5g010620	Medtr1g019940			Medtr7g116795	Medtr4g109720
	Medtr7g117385	Medtr7g087040			Medtr4g091670	Medtr4g121110
	Medtr1g018580	Medtr0438s0020			Medtr1g071480	Medtr3g029650
	Medtr7g005900	Medtr5g093980			Medtr0057s0130	Medtr7g063520
	Medtr7g086340	Medtr8g007385			Medtr4g415390	Medtr7g058760
	Medtr1g041695	Medtr5g015150			Medtr3g068030	Medtr4g132570
	MT4Noble_013033	Medtr3g085570			Medtr1g054450	Medtr2g072030
	Medtr5g009080	Medtr4g130860			Medtr4g094605	Medtr5g070700
	Medtr1g492600	Medtr7g096720			Medtr7g084800	Medtr4g105460
	Medtr3g113710	Medtr2g012440			Medtr5g064160	Medtr4g078765
	Medtr2g007860	Medtr1g015700			Medtr3g095790	Medtr7g103620
	Medtr1g107355	Medtr8g095490			Medtr2g026530	Medtr2g010180
	Medtr3g113110	MT4Noble_022755			Medtr3g030040	Medtr1g083460
		Medtr3g104780			Medtr3g078633	Medtr8g061970
		MT4Noble_028644			Medtr4g009420	Medtr1g048990
		Medtr4g021795			Medtr1480s0010	Medtr0019s0100
		Medtr6g093070			Medtr8g036080	Medtr8g013650
		Medtr8g086550			Medtr1g076470	Medtr7g080270
		Medtr5g075060			Medtr3g087510	Medtr1g033230
		Medtr6g088785			Medtr4g082860	Medtr4g076020
		Medtr2g010510			Medtr1g041585	Medtr2g437080
		Medtr7g074935			Medtr3g104460	Medtr4g094815
		Medtr3g008350			Medtr7g024090	Medtr5g010330
		Medtr8g069135			Medtr8g072430	Medtr6g077640
		Medtr2g075140			Medtr3g449930	Medtr5g071900
		Medtr1g079830			Medtr5g430750	Medtr3g051310
		Medtr3g078830			Medtr2g037850	Medtr4g088835
		Medtr2g100825			Medtr6g036780	Medtr1g011640
		Medtr7g076540			Medtr8g070830	Medtr5g071840
		Medtr4g085550			Medtr1g041465	Medtr4g084970
		Medtr2g073560			Medtr3g025900	Medtr1g115195
		Medtr5g027910			Medtr3g011820	Medtr2g021248
		Medtr1g047210			Medtr3g045770	Medtr1g097690
		Medtr3g028450			Medtr5g094160	Medtr4g101100
		Medtr7g113570			Medtr2g030380	Medtr7g069430
		Medtr8g078690			Medtr6g018300	Medtr6g005610
		Medtr4g109170			Medtr7g075060	Medtr4g461070
		Medtr8g075610			Medtr3g105690	Medtr1g116320
		Medtr7g079350			Medtr6g074660	Medtr4g019150
		Medtr0246s0040			Medtr6g090490	Medtr1g089865
		Medtr4g080050			Medtr2g073500	Medtr7g097110
		Medtr5g010470			Medtr8g038170	Medtr5g034420
		Medtr5g081230			Medtr2g096900	Medtr0185s0010
		Medtr1g007540			Medtr4g073540	Medtr2g093720
		Medtr8g094780			Medtr6g007697	Medtr1g016430
		Medtr3g100460			Medtr5g020020	Medtr6g038230
		Medtr5g065030			MT4Noble_005856	Medtr1g075720
		Medtr8g027525			Medtr2g461290	Medtr2g014220
		Medtr8g027955			Medtr1g115355	Medtr5g054910
		Medtr1g026790			Medtr2g082570	Medtr8g092870
		Medtr5g030975			Medtr7g033165	Medtr2g062980
		Medtr1g054835			Medtr5g065900	Medtr3g039810
		Medtr6g084120			Medtr3g008920	Medtr3g114040
		Medtr8g018910			Medtr7g056317	Medtr4g133900
		Medtr8g461280			Medtr8g041890	Medtr0699s0010
		Medtr5g091680			Medtr5g076620	Medtr6g007663
		Medtr1g081830			Medtr6g029390	Medtr4g093810
		Medtr5g090990			Medtr8g045300	Medtr2g023290
		Medtr3g009540			Medtr1g023120	Medtr4g118700
		Medtr5g012390			Medtr6g088510	Medtr3g100620
		Medtr3g491900			Medtr3g033240	Medtr1g095070
		Medtr0003s0470			Medtr3g117680	Medtr0087s0020
		Medtr8g087410			Medtr6g047640	Medtr2g100595
		Medtr4g084560			Medtr4g122070	Medtr3g063330
		Medtr7g064210			MT4Noble_026538	Medtr4g029350
		Medtr3g106775			Medtr1g041275	Medtr4g108880
		Medtr3g023230			Medtr3g019390	Medtr7g034395
		Medtr7g084380			Medtr2g092980	Medtr6g074885
		Medtr3g096700			Medtr3g462140	Medtr2g011680
		Medtr6g464330			Medtr4g132360	Medtr1g063170
		Medtr2g027660			Medtr4g105400	Medtr8g021310
		Medtr7g028710			Medtr8g027440	Medtr8g032000
		Medtr8g064920			Medtr8g024480	Medtr8g077700
		Medtr4g028090			Medtr8g065900	Medtr7g099680
		Medtr8g037750			Medtr7g062700	Medtr4g118490
		Medtr3g088865			Medtr1g075900	Medtr3g088415
		Medtr8g083460			Medtr7g080165	Medtr5g075955
		Medtr7g094670			Medtr8g087770	Medtr4g068420
		Medtr1g026370			Medtr4g057765	Medtr3g072620
		Medtr4g127440			Medtr7g089970	Medtr7g076150
		Medtr3g083910			Medtr4g114120	Medtr2g097463
		MT4Noble_026934			Medtr2g011080	Medtr7g051020
		Medtr4g130190			Medtr7g063440	Medtr6g088690
		Medtr4g063570			MT4Noble_017226	Medtr3g085640
		Medtr4g098990			Medtr1g070495	Medtr7g108560
		Medtr4g100500			Medtr4g019520	Medtr2g007300
		Medtr5g049790			Medtr6g075290	Medtr6g072515
		Medtr6g022790			Medtr3g113270	Medtr2g010980
		Medtr7g029095			Medtr3g077860	Medtr3g115990
		Medtr3g108670			Medtr7g067300	Medtr1g080910
		Medtr5g007717			Medtr8g094740	Medtr3g114700
		Medtr7g077420			Medtr6g068960	Medtr8g087590
		Medtr1g100633			Medtr0184s0030	Medtr7g102070
		Medtr3g080680			Medtr7g064130	Medtr5g092080
		Medtr1g068950			Medtr7g089120	Medtr4g111720
		Medtr8g064940			Medtr5g035430	MT4Noble_040179
		Medtr8g064300			Medtr1g442840	Medtr2g064660
		Medtr5g033590			Medtr1g019800	Medtr4g104510
		Medtr1g093100			Medtr4g083110	Medtr1g069190
		Medtr2g089440			Medtr1g103550	Medtr2g436730
		Medtr5g459290			Medtr8g011460	Medtr8g088410
		Medtr1g017090			Medtr6g463150	Medtr6g092700
		Medtr5g076170			Medtr5g007350	Medtr7g034590
		Medtr6g018400			Medtr1g090310	Medtr5g023760
		Medtr5g071060			Medtr8g079790	Medtr1643s0010
		Medtr4g081550			Medtr6g066190	Medtr3g085610
		Medtr5g068570			Medtr7g051650	Medtr7g110600
		Medtr6g037540			Medtr7g095430	Medtr4g007580
		Medtr1g090720			Medtr3g113660	Medtr6g079140
		Medtr5g070870			Medtr3g115120	Medtr8g467540
		Medtr2g034960			Medtr4g129180	Medtr2g102550
		Medtr5g038430			Medtr1g023180	Medtr1g028380
		Medtr4g079460			Medtr5g075390	Medtr3g075380
		Medtr3g072870			Medtr3g087800	Medtr3g009520
		Medtr5g022470			Medtr4g132690	MT4Noble_025457
		Medtr4g133577			Medtr5g084460	Medtr5g069050
		Medtr3g102010			Medtr0475s0040	Medtr4g063100
		Medtr8g102820			Medtr1g025680	Medtr4g084620
		Medtr5g030890			Medtr4g072680	Medtr8g032080
		Medtr1g079140			Medtr8g022310	Medtr2g062560
		Medtr4g485520			Medtr1g081000	Medtr4g046047
		Medtr3g461020			MT4Noble_026539	Medtr8g089200
		Medtr1g017870			Medtr2g019900	Medtr1g080020
		Medtr4g009880			Medtr6g091780	Medtr4g109960
		Medtr7g013200			Medtr6g093240	Medtr4g013205
		Medtr8g006915			Medtr2g104550	Medtr2g095060
		Medtr2g006850			Medtr8g099190	Medtr2g105360
		Medtr7g108150			Medtr7g110900	Medtr6g021670
		Medtr1g098530			Medtr3g101670	Medtr1g034450
		Medtr1g059610			Medtr8g075010	Medtr2g036690
		Medtr7g088990			Medtr7g081220	Medtr8g077380
		Medtr5g015470			Medtr3g010000	Medtr1g088540
		Medtr5g016890			MT4Noble_014594	Medtr4g122950
		Medtr4g012000			Medtr1g016510	Medtr2g091215
		Medtr4g019690			Medtr4g069970	Medtr7g406840
		Medtr1g100970			Medtr3g110660	Medtr0491s0030
		Medtr1g051810			Medtr4g115530	Medtr3g030950
		Medtr7g015180			Medtr1g019660	Medtr8g032300
		Medtr4g086330			Medtr4g097880	Medtr7g116340
		Medtr7g451010			Medtr8g070910	Medtr1g016480
		Medtr4g099130			Medtr1g077040	Medtr5g039000
		Medtr1g050670			Medtr7g094450	Medtr5g092370
		Medtr1g036420			Medtr8g008660	Medtr8g083210
		Medtr7g067510			Medtr4g087750	Medtr8g087860
		Medtr3g107310			Medtr2g025080	Medtr8g010700
		Medtr8g465910			Medtr3g075320	Medtr1g111150
		Medtr1g052470			Medtr8g064530	Medtr8g039930
		Medtr0018s0090			Medtr4g016850	Medtr5g035190
		Medtr4g095390			Medtr5g020640	Medtr5g093390
		Medtr1g087040			Medtr7g091450	Medtr5g015210
		MT4Noble_041929			Medtr5g032100	Medtr7g099890
		Medtr6g464320			Medtr3g087490	Medtr8g103245
		Medtr3g019000			Medtr5g098785	Medtr7g107670
		Medtr5g017700			Medtr0276s0040	Medtr8g087740
		Medtr1g073670			Medtr4g076940	Medtr5g065860
		Medtr7g066800			Medtr1g032630	Medtr6g023885
		Medtr8g063790			Medtr3g008630	Medtr1g044130
		Medtr6g091930			Medtr3g100680	Medtr2g096380
		Medtr3g462730			Medtr8g092590	Medtr2g058970
		Medtr1g041285			Medtr1g111660	Medtr1g016850
		Medtr1g016110			Medtr4g109600	Medtr1g071240
		Medtr5g010650			Medtr3g070210	Medtr2g025580
		Medtr1g066620			Medtr3g082130	Medtr3g114780
		Medtr3g114530			Medtr1g089630	Medtr3g052285
		Medtr4g092760			Medtr8g445170	Medtr1g083110
		Medtr4g134180			Medtr6g015750	Medtr1g021570
		Medtr5g036080			Medtr3g030860	Medtr7g406830
		Medtr1g013560			Medtr6g092150	Medtr4g070340
		Medtr2g085300			Medtr4g008200	Medtr4g014600
		Medtr3g116830			Medtr2g078250	Medtr4g075610
		Medtr1g109120			Medtr1g025420	Medtr7g010300
		Medtr5g023210			Medtr6g009200	Medtr1g100800
		Medtr8g107730			Medtr1g090733	MT4Noble_041157
		Medtr4g052460			Medtr7g058530	Medtr1g096340
		Medtr1g111390			Medtr5g036290	Medtr4g104680
		Medtr6g045467			Medtr5g014600	Medtr3g091350
		Medtr8g089990			Medtr8g104190	Medtr2g040570
		Medtr6g088705			Medtr1g112190	Medtr5g070470
		Medtr3g087230			Medtr6g066240	Medtr7g067000
		Medtr1g080300			Medtr5g058090	Medtr2g090055
		Medtr2g089520			Medtr6g021615	MT4Noble_008792
		Medtr2g104770			Medtr3g108600	Medtr1g115295
		Medtr7g076290			Medtr6g092790	Medtr4g131750
		Medtr1g088460			Medtr3g088930	Medtr4g013375
		Medtr4g088950			Medtr3g016215	Medtr4g094488
		Medtr4g023260			Medtr8g077610	Medtr2g101820
		Medtr8g091650			Medtr3g098650	Medtr6g092630
		Medtr8g007150			Medtr2g021242	Medtr3g088605
		Medtr6g025730			Medtr4g093040	Medtr7g103610
		Medtr7g028415			Medtr3g090480	Medtr3g462970
		Medtr1g090180			Medtr1008s0010	Medtr7g092970
		Medtr7g114600			Medtr5g086610	Medtr4g125710
		Medtr7g100020			Medtr4g071465	Medtr1g056490
		Medtr8g020880			Medtr3g083300	Medtr7g083635
		Medtr4g005340			Medtr6g007095	Medtr2g014870
		Medtr5g027510			Medtr8g081510	Medtr3g088645
		Medtr7g047560			Medtr7g053260	Medtr8g021130
		Medtr5g005550			Medtr4g050190	Medtr0468s0010
		Medtr3g093800			Medtr3g117840	Medtr1g040675
		MT4Noble_052146			Medtr4g127970	Medtr2g010800
		Medtr2g071740			Medtr4g125600	Medtr4g094882
		Medtr8g104890			Medtr8g083170	Medtr3g012040
		Medtr2g073600			Medtr5g059900	Medtr3g013490
		Medtr8g092210			Medtr5g019430	Medtr4g107650
		Medtr4g079180			Medtr8g096960	Medtr7g009470
		Medtr5g021090			Medtr4g109470	Medtr1g083600
		Medtr8g031480			Medtr4g067090	Medtr3g072363
		Medtr4g090460			Medtr1g110860	Medtr3g091560
		Medtr1g020070			Medtr4g050170	Medtr1g019360
		Medtr5g077270			Medtr6g023390	Medtr7g113740
		Medtr7g077840			Medtr2g460740	Medtr1g071810
		MT4Noble_052817			Medtr2g012470	Medtr7g114790
		Medtr8g074270			Medtr2g460760	Medtr7g018240
		Medtr1g109060			Medtr4g128930	Medtr1g077840
		Medtr7g087590			Medtr7g033415	Medtr6g038390
		Medtr3g109935			Medtr3g084540	Medtr2g007780
		Medtr1g083720			Medtr1g050462	Medtr1g083690
		Medtr2g450210			Medtr1g017490	Medtr4g096820
		Medtr2g086160			Medtr4g072380	Medtr1g011520
		Medtr3g116380			Medtr1g110930	Medtr3g030975
		Medtr7g451650			Medtr4g113100	Medtr1g006600
		Medtr7g082490			Medtr4g092020	Medtr1g062190
		Medtr2g099860			Medtr3g072190	Medtr5g029260
		Medtr5g005320			Medtr6g086560	Medtr5g069055
		Medtr7g064080			Medtr4g037505	Medtr8g099045
		Medtr3g077620			Medtr8g023790	Medtr4g082950
		Medtr4g086500			Medtr7g102750	Medtr5g030020
		Medtr4g125440			Medtr4g104760	Medtr3g073420
		Medtr7g092875			Medtr8g085980	Medtr1g040555
		Medtr2g021030			Medtr2g010740	Medtr0087s0090
		Medtr1g094680			Medtr8g099245	Medtr8g070530
		Medtr8g027285			Medtr2g030240	Medtr6g008950
		Medtr6g083250			Medtr4g072500	Medtr4g030890
		Medtr2g062270			Medtr3g065330	Medtr5g076270
		Medtr1g484830			Medtr7g105030	Medtr4g007140
		Medtr3g098380			Medtr1g076730	Medtr4g016770
		Medtr2g035460			Medtr8g018735	Medtr6g093190
		Medtr2g009310			Medtr6g088610	Medtr2g072600
		Medtr7g081260			Medtr1g061560	Medtr4g095012
		Medtr5g089510			Medtr2g037600	Medtr1g075320
		Medtr6g065670			Medtr2g103670	Medtr5g064480
		Medtr7g105810			Medtr5g032790	Medtr8g090270
		Medtr1g111830			Medtr2g078530	Medtr4g052620
		Medtr8g105830			Medtr3g105080	Medtr2g032540
		Medtr6g018490			Medtr2g038720	Medtr8g105790
		Medtr6g004940			Medtr1g072490	Medtr5g083710
		Medtr4g035885			Medtr1g060440	Medtr2g076960
		Medtr3g118470			Medtr1g093240	Medtr4g105690
		Medtr8g088670			Medtr6g038640	Medtr1g069320
		Medtr5g054560			Medtr4g035550	Medtr1g027940
		Medtr7g107310			Medtr7g081705	Medtr7g029030
		Medtr4g078170			Medtr4g096780	Medtr8g095030
		Medtr7g072710			Medtr4g103835	Medtr3g467350
		MT4Noble_026421			Medtr4g131760	Medtr5g090630
		Medtr1g007840			Medtr8g033410	Medtr8g466250
		Medtr7g451760			Medtr7g093200	Medtr3g085380
		Medtr3g116130			Medtr5g074620	Medtr6g087850
		Medtr4g025370			Medtr6g075440	Medtr2g015430
		Medtr5g018790			Medtr5g088990	Medtr2g019320
		Medtr2g037970			Medtr2g078340	Medtr7g108220
		Medtr8g023240			Medtr1g072260	Medtr8g099195
		Medtr3g096520			Medtr6g034265	Medtr1g057400
		MT4Noble_019663			Medtr0083s0120	Medtr2g022190
		Medtr1g048370			Medtr8g105350	Medtr3g115340
		Medtr3g053790			Medtr7g082220	Medtr5g082890
		Medtr3g065010			Medtr6g011400	Medtr5g060950
		Medtr5g090130			Medtr7g110710	Medtr8g088560
		Medtr8g099535			Medtr5g045250	Medtr6g051800
		Medtr7g104300			Medtr4g065007	Medtr3g108640
		Medtr3g098160			Medtr8g088110	Medtr2g015510
		Medtr1g092420			Medtr5g077000	Medtr7g114980
		Medtr7g005910			Medtr8g059125	Medtr2g096920
		Medtr1g064240			Medtr8g089180	Medtr6g082820
		Medtr8g062310			Medtr1g105700	Medtr2g103280
		Medtr1g112940			Medtr1g017350	Medtr5g011280
		Medtr8g017190			Medtr2g016580	Medtr4g085990
		Medtr1g101810			Medtr5g026930	Medtr4g127800
		Medtr2g098070			Medtr6g471820	Medtr2g049990
		Medtr6g060685			Medtr6g011340	MT4Noble_011656
		Medtr0268s0020			Medtr2g071750	Medtr3g111870
		Medtr5g096597			Medtr0415s0020	Medtr3g017580
		Medtr5g007940			Medtr2g029370	Medtr8g468600
		Medtr7g090930			Medtr8g027385	Medtr1g031220
		Medtr4g084660			Medtr7g101170	Medtr6g015680
		Medtr1g067260			Medtr8g091710	Medtr4g127690
		Medtr6g037550			Medtr1g097160	Medtr1g095950
		Medtr8g076100			Medtr8g091470	Medtr6g051780
		Medtr8g027805			MT4Noble_057132	Medtr8g087940
		Medtr2g016870			Medtr8g098840	Medtr7g076670
		Medtr7g014570			Medtr7g052820	Medtr3g074050
		Medtr4g107970			Medtr4g087730	Medtr3g118430
		Medtr3g462400			Medtr2g080220	Medtr4g111975
		Medtr7g069700			Medtr4g007080	Medtr4g010180
		Medtr4g080020			Medtr4g052420	Medtr2g084535
		Medtr1g093080			Medtr5g008900	Medtr1g033000
		Medtr8g016170			Medtr1g492950	Medtr3g014280
		Medtr6g044410			Medtr3g073990	Medtr0325s0020
		Medtr2g095510			Medtr5g081560	Medtr2g104040
		Medtr1g062660			Medtr5g087740	Medtr3g110190
		Medtr3g117800			Medtr4g059320	Medtr2g098560
		Medtr5g083910			Medtr7g106500	Medtr8g030860
		Medtr1g022045			Medtr1g049140	Medtr8g019440
		Medtr2g011490			Medtr4g083130	Medtr1g071795
		Medtr3g101390			Medtr5g034320	Medtr3g082630
		Medtr2g083220			Medtr0121s0060	Medtr8g088510
		Medtr7g106570			Medtr6g013420	Medtr8g098695
		Medtr2g090800			Medtr8g078900	Medtr8g091420
		Medtr7g024460			Medtr5g086040	Medtr3g074250
		Medtr4g074240			Medtr6g008170	Medtr2g044810
		Medtr1g077460			Medtr7g095260	Medtr3g082700
		Medtr7g112150			Medtr8g027995	Medtr8g087990
		Medtr3g096240			Medtr5g034750	Medtr3g082680
		Medtr5g068710			Medtr1g101870	Medtr5g089720
		Medtr3g061900			Medtr2g079830	Medtr5g086810
		Medtr3g063360			Medtr4g101650	Medtr8g471180
		Medtr4g108910			Medtr2g101990	Medtr1g011510
		Medtr6g079220			Medtr2g093740	Medtr4g062100
		Medtr7g082460			Medtr1g021970	Medtr1g072320
		Medtr3g087940			Medtr4g108780	Medtr2g088470
		Medtr1g112610			Medtr1g041395	Medtr4g061300
		Medtr8g464490			Medtr7g080180	Medtr4g065003
		Medtr3g092720			Medtr7g024480	Medtr4g084110
		Medtr7g094600			Medtr7g107560	Medtr1g030630
		Medtr3g055020			Medtr2g086580	Medtr4g092790
		Medtr5g010050			Medtr1g071680	Medtr7g096090
		Medtr7g055620			Medtr2g024330	Medtr3g074890
		MT4Noble_028749			Medtr3g462150	Medtr3g028150
		Medtr2g014120			Medtr2g017965	Medtr4g060900
		Medtr8g089975			Medtr0312s0020	Medtr1g048610
		Medtr2g450730			Medtr3g084150	Medtr3g088030
		Medtr1g111190			Medtr8g081010	Medtr1g024005
		Medtr4g099110			Medtr1g105865	Medtr8g037260
		Medtr1g015810			Medtr5g036490	Medtr4g115730
		Medtr5g019420			Medtr2g048360	MT4Noble_020438
		Medtr4g132430			Medtr8g023150	Medtr7g107680
		Medtr1g028370			Medtr6g082800	Medtr5g008260
		Medtr1g087290			Medtr3g110185	Medtr2g010540
		Medtr7g014200			Medtr8g103540	Medtr7g015230
		Medtr5g008720			Medtr5g062430	Medtr8g042690
		Medtr3g088545			Medtr5g019620	Medtr3g462700
		Medtr1g110190			Medtr2g019600	Medtr3g086750
		Medtr7g114680			Medtr7g024320	Medtr7g112720
		Medtr8g081640			Medtr1g111590	Medtr4g091760
		MT4Noble_053680			Medtr6g023070	Medtr2g088100
		Medtr2g090060			Medtr5g096670	Medtr8g075420
		Medtr4g080140			Medtr7g117750	Medtr5g090440
		Medtr3g435170			Medtr7g065220	Medtr3g114110
		Medtr3g096930			Medtr3g108220	Medtr7g058860
		Medtr4g129860			Medtr1g115225	Medtr5g030860
		MT4Noble_040800			Medtr1g094660	Medtr4g022670
		Medtr6g027300			Medtr3g096900	Medtr7g066410
		Medtr6g009500			Medtr3g009020	Medtr4g070360
		Medtr7g117900			Medtr8g045560	Medtr3g105990
		Medtr1g061550			Medtr4g071090	Medtr3g068025
		Medtr4g057730			Medtr1g072540	Medtr4g105610
		Medtr3g111210			Medtr4g048040	Medtr4g100480
		Medtr1g111980			Medtr8g069330	Medtr5g076950
		Medtr8g006910			Medtr2g013470	Medtr6g047450
		Medtr3g102120			Medtr8g024180	Medtr1g096910
		Medtr3g071320			Medtr3g464730	Medtr6g015770
		Medtr6g090615			Medtr5g018670	Medtr1g070490
		Medtr6g082940			Medtr7g088350	Medtr2g073260
		Medtr2g088940			Medtr2g071790	Medtr6g072540
		Medtr3g103310			Medtr3g082200	Medtr2g089795
		Medtr8g072800			Medtr1g085640	Medtr4g029730
		Medtr5g014910			Medtr1g070100	Medtr2g061510
		Medtr8g009063			Medtr1g063260	Medtr4g006830
		MT4Noble_030115			Medtr7g088790	Medtr3g112090
		Medtr6g007170			Medtr4g088415	Medtr6g018970
		Medtr7g068940			MT4Noble_005516	Medtr4g065040
		Medtr5g029690			Medtr7g051510	Medtr4g056520
		Medtr8g099275			Medtr8g005175	Medtr1588s0010
		Medtr1g048060			Medtr4g064750	Medtr7g099710
		Medtr1g016340			Medtr0078s0200	Medtr8g468500
		Medtr7g093540			Medtr6g033870	Medtr4g015930
		Medtr4g011050			Medtr4g115170	Medtr5g030530
		Medtr3g074640			Medtr2g028220	Medtr8g090350
		Medtr5g071470			Medtr2g462010	Medtr8g093650
		Medtr7g016650			Medtr2g010820	Medtr8g446810
		Medtr5g006530			Medtr5g057990	Medtr4g107040
		Medtr1g052680			Medtr7g072860	Medtr2g041200
		Medtr1g088910			Medtr3g087780	Medtr1g076130
		Medtr2g090380			Medtr3g464570	Medtr5g031305
		Medtr2g013655			Medtr6g060175	Medtr3g068000
		Medtr5g089895			Medtr7g022480	MT4Noble_015420
		Medtr1g107215			Medtr3g093930	Medtr5g013910
		Medtr7g069750			Medtr2g072510	Medtr7g009560
		Medtr1g046730			Medtr7g015520	Medtr4g079580
		Medtr3g008540			Medtr3g498755	Medtr6g045607
		Medtr4g132780			Medtr1g024095	MT4Noble_013504
		Medtr0279s0020			Medtr3g095540	Medtr7g053410
		MT4Noble_000943			Medtr8g447000	Medtr3g115970
		Medtr1g103570			Medtr7g073720	Medtr7g091110
		Medtr3g028720			Medtr4g048620	Medtr2g099450
		Medtr1g018470			Medtr4g087540	Medtr5g021710
		Medtr1g015410			Medtr6g022830	Medtr8g094180
		Medtr5g093790			Medtr7g110130	Medtr0308s0020
		Medtr4g020070			Medtr8g012970	Medtr3g117690
		Medtr7g100680			Medtr4g122090	Medtr0148s0080
		Medtr3g110180			Medtr4g098500	Medtr7g104350
		Medtr3g116840			Medtr2g011580	Medtr4g109540
		Medtr7g094240			Medtr3g065980	Medtr1g046790
		Medtr2g090685			Medtr7g022360	Medtr4g130410
		Medtr8g028150			Medtr8g087640	Medtr5g021130
[truncated: 3,711 more rows]

## Sheet: GO age down only
REG-MAP				REVIGO
GO.ID	p-value	Description		GO.ID	Log10 Value	Description
GO:0007018	1.8e-06	microtubule-based movement		GO:0007018	-5.7447	microtubule-based movement
GO:0042221	2e-06	response to chemical		GO:0042221	-5.699	response to chemical
GO:0005975	2.2e-06	carbohydrate metabolic process		GO:0005975	-5.6576	carbohydrate metabolic process
GO:0006928	2.5e-06	movement of cell or subcellular component		GO:0006928	-5.6021	movement of cell or subcellular component
GO:0009719	3.3e-06	response to endogenous stimulus		GO:0009719	-5.4815	response to endogenous stimulus
GO:0010033	4.8e-06	response to organic substance		GO:0010033	-5.3188	response to organic substance
GO:1901700	8.8e-06	response to oxygen-containing compound		GO:0050896	-4.8861	response to stimulus
GO:0050896	1.3e-05	response to stimulus		GO:0009834	-3.8861	plant-type secondary cell wall biogenesis
GO:0009725	3.5e-05	response to hormone		GO:2000652	-3.7959	regulation of secondary cell wall biogenesis
GO:0009834	0.00013	plant-type secondary cell wall biogenesis		GO:0009888	-3.6576	tissue development
GO:2000652	0.00016	regulation of secondary cell wall biogenesis		GO:1903338	-3.6576	regulation of cell wall organization or biogenesis
GO:0001101	0.00022	response to acid chemical		GO:0005984	-3.585	disaccharide metabolic process
GO:1903338	0.00022	regulation of cell wall organization or biogenesis		GO:0009698	-3.3372	phenylpropanoid metabolic process
GO:0009888	0.00022	tissue development		GO:0007017	-3.3098	microtubule-based process
GO:0005984	0.00026	disaccharide metabolic process		GO:0044262	-3.284	cellular carbohydrate metabolic process
GO:0009808	0.0004	lignin metabolic process		GO:0071554	-3.2676	cell wall organization or biogenesis
GO:0009698	0.00046	phenylpropanoid metabolic process		GO:0019748	-3.2007	secondary metabolic process
GO:0007017	0.00049	microtubule-based process		GO:0044070	-3.0223	regulation of anion transport
GO:0044262	0.00052	cellular carbohydrate metabolic process		GO:0009767	-2.9788	photosynthetic electron transport chain
GO:0006950	0.00053	response to stress		GO:0009933	-2.9706	meristem structural organization
GO:0071554	0.00054	cell wall organization or biogenesis		GO:0015977	-2.9318	carbon fixation
GO:0009772	0.00062	photosynthetic electron transport in photosystem II		GO:0006952	-2.8996	defense response
GO:0019748	0.00063	secondary metabolic process		GO:0009987	-2.8962	cellular process
GO:0042546	0.0007	cell wall biogenesis		GO:0009893	-2.8794	positive regulation of metabolic process
GO:0097305	0.00074	response to alcohol		GO:0009861	-2.8125	jasmonic acid and ethylene-dependent systemic resistance
GO:1903959	0.00077	regulation of anion transmembrane transport		GO:0044087	-2.7905	regulation of cellular component biogenesis
GO:0010088	0.00079	phloem development		GO:0009627	-2.7235	systemic acquired resistance
GO:0044070	0.00095	regulation of anion transport		GO:0009202	-2.7144	deoxyribonucleoside triphosphate biosynthetic process
GO:0009891	0.00099	positive regulation of biosynthetic process		GO:0010045	-2.7144	response to nickel cation
GO:0009767	0.00105	photosynthetic electron transport chain		GO:0009871	-2.7144	jasmonic acid and ethylene-dependent systemic resistance, ethylene mediated signaling pathway
GO:0009933	0.00107	meristem structural organization		GO:0009607	-2.6737	response to biotic stimulus
GO:0071669	0.0011	plant-type cell wall organization or biogenesis		GO:0046470	-2.5817	phosphatidylcholine metabolic process
GO:0015977	0.00117	carbon fixation		GO:0052545	-2.5482	callose localization
GO:0033993	0.00119	response to lipid		GO:0033037	-2.4622	polysaccharide localization
GO:0010087	0.00124	phloem or xylem histogenesis		GO:0048518	-2.4572	positive regulation of biological process
GO:0006952	0.00126	defense response		GO:0010232	-2.3947	vascular transport
GO:0044763	0.00127	single-organism cellular process		GO:0042439	-2.3526	ethanolamine-containing compound metabolic process
GO:0009893	0.00132	positive regulation of metabolic process		GO:0042744	-2.295	hydrogen peroxide catabolic process
GO:0034765	0.00142	regulation of ion transmembrane transport		GO:0032879	-2.2941	regulation of localization
GO:0030154	0.00147	cell differentiation		GO:0009926	-2.2874	auxin polar transport
GO:0009861	0.00154	jasmonic acid and ethylene-dependent systemic resistance		GO:0033206	-2.2495	meiotic cytokinesis
GO:0048759	0.00154	xylem vessel member cell differentiation		GO:0009963	-2.2495	positive regulation of flavonoid biosynthetic process
GO:0009311	0.0016	oligosaccharide metabolic process		GO:0010200	-2.2083	response to chitin
GO:0044087	0.00162	regulation of cellular component biogenesis		GO:0009605	-2.1107	response to external stimulus
GO:0045893	0.00164	positive regulation of transcription, DNA-templated		GO:0009862	-2.0926	systemic acquired resistance, salicylic acid mediated signaling pathway
GO:1902680	0.00164	positive regulation of RNA biosynthetic process		GO:0055114	-2.041	(obsolete) oxidation-reduction process
GO:1903508	0.00164	positive regulation of nucleic acid-templated transcription		GO:0010941	-2.04	regulation of cell death
GO:0034762	0.00171	regulation of transmembrane transport		GO:0006629	-2.0376	lipid metabolic process
GO:0009832	0.00179	plant-type cell wall biogenesis
GO:0009627	0.00189	systemic acquired resistance
GO:0009202	0.00193	deoxyribonucleoside triphosphate biosynthetic process
GO:0009871	0.00193	jasmonic acid and ethylene-dependent systemic resistance, ethylene mediated signaling pathway
GO:0010045	0.00193	response to nickel cation
GO:0071289	0.00193	cellular response to nickel ion
GO:0080165	0.00193	callose deposition in phloem sieve plate
GO:0009607	0.00212	response to biotic stimulus
GO:0048513	0.00216	organ development
GO:0009611	0.00224	response to wounding
GO:0048532	0.00235	anatomical structure arrangement
GO:0051254	0.00235	positive regulation of RNA metabolic process
GO:0046470	0.00262	phosphatidylcholine metabolic process
GO:0052545	0.00283	callose localization
GO:0009737	0.00309	response to abscisic acid
GO:0022622	0.00343	root system development
GO:0033037	0.00345	polysaccharide localization
GO:0048518	0.00349	positive regulation of biological process
GO:0010232	0.00403	vascular transport
GO:0010233	0.00403	phloem transport
GO:0010089	0.00416	xylem development
GO:0042439	0.00444	ethanolamine-containing compound metabolic process
GO:0031328	0.00448	positive regulation of cellular biosynthetic process
GO:0045935	0.00454	positive regulation of nucleobase-containing compound metabolic process
GO:0048646	0.00454	anatomical structure formation involved in morphogenesis
GO:0006979	0.00456	response to oxidative stress
GO:0005992	0.00496	trehalose biosynthetic process
GO:0009809	0.00496	lignin biosynthetic process
GO:0042744	0.00507	hydrogen peroxide catabolic process
GO:0032879	0.00508	regulation of localization
GO:0010557	0.00513	positive regulation of macromolecule biosynthetic process
GO:0042743	0.00515	hydrogen peroxide metabolic process
GO:0009926	0.00516	auxin polar transport
GO:0048869	0.00523	cellular developmental process
GO:0007112	0.00563	male meiosis cytokinesis
GO:0009806	0.00563	lignan metabolic process
GO:0009807	0.00563	lignan biosynthetic process
GO:0009963	0.00563	positive regulation of flavonoid biosynthetic process
GO:0033206	0.00563	meiotic cytokinesis
GO:0006073	0.00605	cellular glucan metabolic process
GO:0044042	0.00605	glucan metabolic process
GO:0009733	0.0061	response to auxin
GO:0010200	0.00619	response to chitin
GO:0098542	0.00647	defense response to other organism
GO:0010410	0.00658	hemicellulose metabolic process
GO:0010038	0.00667	response to metal ion
GO:0048364	0.00667	root development
GO:0043269	0.00672	regulation of ion transport
GO:0005985	0.0069	sucrose metabolic process
GO:0005991	0.0069	trehalose metabolic process
GO:0009814	0.00696	defense response, incompatible interaction
GO:0031325	0.00701	positive regulation of cellular metabolic process
GO:0009605	0.00775	response to external stimulus
GO:0044036	0.00799	cell wall macromolecule metabolic process
GO:0009862	0.00808	systemic acquired resistance, salicylic acid mediated signaling pathway
GO:0010243	0.00842	response to organonitrogen compound
GO:0010628	0.00859	positive regulation of gene expression
GO:0055114	0.0091	oxidation-reduction process
GO:0010026	0.00911	trichome differentiation
GO:0010941	0.00912	regulation of cell death
GO:0051049	0.00912	regulation of transport
GO:0006629	0.00917	lipid metabolic process
GO:0010035	0.01	response to inorganic substance

## Sheet: GO dark down only
REG-MAP				REVIGO
GO.ID	p-value	Description		GO.ID	Log10 Value	Description
GO:1901564	1e-30	organonitrogen compound metabolic process		GO:1901564	-30	organonitrogen compound metabolic process
GO:1901566	1e-30	organonitrogen compound biosynthetic process		GO:1901566	-30	organonitrogen compound biosynthetic process
GO:0043603	9.3e-29	cellular amide metabolic process		GO:0043603	-28.0315	cellular amide metabolic process
GO:0006518	4.2e-28	peptide metabolic process		GO:0006412	-26.6383	translation
GO:0043043	8.5e-28	peptide biosynthetic process		GO:0009987	-17.7447	cellular process
GO:0006412	2.3e-27	translation		GO:0044237	-13.6576	cellular metabolic process
GO:0043604	6.3e-27	amide biosynthetic process		GO:0009058	-12.7959	biosynthetic process
GO:0009987	1.8e-18	cellular process		GO:0009451	-11.4202	RNA modification
GO:1901576	1.2e-14	organic substance biosynthetic process		GO:0042254	-11.1249	ribosome biogenesis
GO:0044237	2.2e-14	cellular metabolic process		GO:0044281	-11.0862	small molecule metabolic process
GO:0009058	1.6e-13	biosynthetic process		GO:0006091	-9.2441	generation of precursor metabolites and energy
GO:0044249	2e-13	cellular biosynthetic process		GO:0051186	-9.1308	(obsolete) cofactor metabolic process
GO:0044267	1.4e-12	cellular protein metabolic process		GO:0009628	-8.585	response to abiotic stimulus
GO:0009451	3.8e-12	RNA modification		GO:0000959	-8.3188	mitochondrial RNA metabolic process
GO:0042254	7.5e-12	ribosome biogenesis		GO:1900864	-7.9586	mitochondrial RNA modification
GO:0044281	8.2e-12	small molecule metabolic process		GO:0009657	-7.8861	plastid organization
GO:0022613	6.1e-11	ribonucleoprotein complex biogenesis		GO:0016556	-7.3188	mRNA modification
GO:0044711	6.4e-11	single-organism biosynthetic process		GO:0006807	-6.699	nitrogen compound metabolic process
GO:0006091	5.7e-10	generation of precursor metabolites and energy		GO:0010467	-6.6576	gene expression
GO:0051186	7.4e-10	cofactor metabolic process		GO:0009416	-6.6576	response to light stimulus
GO:0009628	2.6e-09	response to abiotic stimulus		GO:0005982	-6.3565	starch metabolic process
GO:0000959	4.8e-09	mitochondrial RNA metabolic process		GO:0015979	-6.2291	photosynthesis
GO:0043436	6.7e-09	oxoacid metabolic process		GO:0008152	-6.1938	metabolic process
GO:0006082	8.2e-09	organic acid metabolic process		GO:0072524	-6.1805	pyridine-containing compound metabolic process
GO:0019752	8.8e-09	carboxylic acid metabolic process		GO:0005975	-6.1135	carbohydrate metabolic process
GO:1900864	1.1e-08	mitochondrial RNA modification		GO:0019538	-6.1024	protein metabolic process
GO:0009657	1.3e-08	plastid organization		GO:0006793	-5.9586	phosphorus metabolic process
GO:0044283	1.4e-08	small molecule biosynthetic process		GO:0046939	-5.8539	nucleotide phosphorylation
GO:0044271	3e-08	cellular nitrogen compound biosynthetic process		GO:0019684	-5.7959	photosynthesis, light reaction
GO:0016556	4.8e-08	mRNA modification		GO:0006732	-5.7696	(obsolete) coenzyme metabolic process
GO:0080156	7.5e-08	mitochondrial mRNA modification		GO:0006090	-5.7696	pyruvate metabolic process
GO:0006807	2e-07	nitrogen compound metabolic process		GO:0016052	-5.7212	carbohydrate catabolic process
GO:0010467	2.2e-07	gene expression		GO:0009132	-5.3768	nucleoside diphosphate metabolic process
GO:0009416	2.2e-07	response to light stimulus		GO:0009658	-5.3665	chloroplast organization
GO:0006165	4.4e-07	nucleoside diphosphate phosphorylation		GO:0009735	-5.2924	response to cytokinin
GO:0005982	4.4e-07	starch metabolic process		GO:0034641	-5.2596	cellular nitrogen compound metabolic process
GO:0015979	5.9e-07	photosynthesis		GO:0015698	-5.0655	inorganic anion transport
GO:0008152	6.4e-07	metabolic process		GO:0044260	-5.0132	cellular macromolecule metabolic process
GO:0072524	6.6e-07	pyridine-containing compound metabolic process		GO:0006457	-4.8861	protein folding
GO:0044723	7.7e-07	single-organism carbohydrate metabolic process		GO:0043412	-4.8861	macromolecule modification
GO:0019538	7.9e-07	protein metabolic process		GO:0010109	-4.7212	regulation of photosynthesis
GO:0009314	8.1e-07	response to radiation		GO:0071704	-4.6383	organic substance metabolic process
GO:0080167	9.5e-07	response to karrikin		GO:0006733	-4.4318	(obsolete) oxidoreduction coenzyme metabolic process
GO:0006793	1.1e-06	phosphorus metabolic process		GO:0072528	-4.2518	pyrimidine-containing compound biosynthetic process
GO:0016310	1.3e-06	phosphorylation		GO:0010035	-4.041	response to inorganic substance
GO:0046939	1.4e-06	nucleotide phosphorylation		GO:0042221	-3.9586	response to chemical
GO:0006096	1.4e-06	glycolytic process		GO:1901135	-3.8239	carbohydrate derivative metabolic process
GO:0006757	1.4e-06	ATP generation from ADP		GO:0031425	-3.7696	chloroplast RNA processing
GO:0046031	1.4e-06	ADP metabolic process		GO:0006778	-3.7212	porphyrin-containing compound metabolic process
GO:0034645	1.5e-06	cellular macromolecule biosynthetic process		GO:0042548	-3.6576	regulation of photosynthesis, light reaction
GO:0006796	1.5e-06	phosphate-containing compound metabolic process		GO:0009617	-3.6383	response to bacterium
GO:0019684	1.6e-06	photosynthesis, light reaction		GO:0006766	-3.6383	vitamin metabolic process
GO:0006732	1.7e-06	coenzyme metabolic process		GO:0030091	-3.5376	protein repair
GO:0006090	1.7e-06	pyruvate metabolic process		GO:0009605	-3.5376	response to external stimulus
GO:0044724	1.9e-06	single-organism carbohydrate catabolic process		GO:0051188	-3.5229	(obsolete) cofactor biosynthetic process
GO:0009135	3e-06	purine nucleoside diphosphate metabolic process		GO:0072527	-3.5086	pyrimidine-containing compound metabolic process
GO:0009179	3e-06	purine ribonucleoside diphosphate metabolic process		GO:0000413	-3.4949	protein peptidyl-prolyl isomerization
GO:0009185	3e-06	ribonucleoside diphosphate metabolic process		GO:0050896	-3.4318	response to stimulus
GO:0009059	3e-06	macromolecule biosynthetic process		GO:0048544	-3.4089	recognition of pollen
GO:0006820	3.3e-06	anion transport		GO:0043467	-3.4089	regulation of generation of precursor metabolites and energy
GO:0009132	4.2e-06	nucleoside diphosphate metabolic process		GO:0006112	-3.3872	energy reserve metabolic process
GO:0009658	4.3e-06	chloroplast organization		GO:0008037	-3.3372	cell recognition
GO:0016053	5e-06	organic acid biosynthetic process		GO:0044238	-3.2218	primary metabolic process
GO:0046394	5e-06	carboxylic acid biosynthetic process		GO:0033013	-3.1367	tetrapyrrole metabolic process
GO:0009735	5.1e-06	response to cytokinin		GO:0010135	-3.0862	ureide metabolic process
GO:0034641	5.5e-06	cellular nitrogen compound metabolic process		GO:0043605	-3.0862	cellular amide catabolic process
GO:0046496	7e-06	nicotinamide nucleotide metabolic process		GO:0010136	-3.0862	ureide catabolic process
GO:0015698	8.6e-06	inorganic anion transport		GO:1901615	-2.9914	organic hydroxy compound metabolic process
GO:0019362	9.1e-06	pyridine nucleotide metabolic process		GO:0019725	-2.9031	cellular homeostasis
GO:0044260	9.7e-06	cellular macromolecule metabolic process		GO:0007154	-2.8894	cell communication
GO:0006364	1e-05	rRNA processing		GO:0009071	-2.6696	serine family amino acid catabolic process
GO:0006457	1.3e-05	protein folding		GO:0010608	-2.6576	posttranscriptional regulation of gene expression
GO:0043412	1.3e-05	macromolecule modification		GO:0072521	-2.5654	purine-containing compound metabolic process
GO:0016072	1.4e-05	rRNA metabolic process		GO:1901657	-2.5622	glycosyl compound metabolic process
GO:0044763	1.6e-05	single-organism cellular process		GO:0006952	-2.5591	defense response
GO:0019252	1.8e-05	starch biosynthetic process		GO:0008610	-2.5467	lipid biosynthetic process
GO:0010109	1.9e-05	regulation of photosynthesis		GO:0042440	-2.5171	pigment metabolic process
GO:0071704	2.3e-05	organic substance metabolic process		GO:0006857	-2.5003	oligopeptide transport
GO:0071482	2.9e-05	cellular response to light stimulus		GO:0007005	-2.4908	mitochondrion organization
GO:0098656	3.2e-05	anion transmembrane transport		GO:0006790	-2.4389	sulfur compound metabolic process
GO:0006733	3.7e-05	oxidoreduction coenzyme metabolic process		GO:0072348	-2.4318	sulfur compound transport
GO:0032787	3.7e-05	monocarboxylic acid metabolic process		GO:0009944	-2.4214	polarity specification of adaxial/abaxial axis
GO:0010038	4e-05	response to metal ion		GO:0006081	-2.3242	cellular aldehyde metabolic process
GO:0046686	5.6e-05	response to cadmium ion		GO:0070272	-2.3161	(obsolete) proton-transporting ATP synthase complex biogenesis
GO:0072528	5.6e-05	pyrimidine-containing compound biosynthetic process		GO:0042753	-2.3161	positive regulation of circadian rhythm
GO:0006520	8e-05	cellular amino acid metabolic process		GO:0045912	-2.3161	negative regulation of carbohydrate metabolic process
GO:0009266	8.8e-05	response to temperature stimulus		GO:0010258	-2.3161	NADH dehydrogenase complex (plastoquinone) assembly
GO:0071478	8.9e-05	cellular response to radiation		GO:0031116	-2.3161	positive regulation of microtubule polymerization
GO:0010035	9.1e-05	response to inorganic substance		GO:0007623	-2.3152	circadian rhythm
GO:0009082	9.9e-05	branched-chain amino acid biosynthetic process		GO:0048511	-2.3152	rhythmic process
GO:0042221	0.00011	response to chemical		GO:1901617	-2.3152	organic hydroxy compound biosynthetic process
GO:0034470	0.00012	ncRNA processing		GO:0046184	-2.3089	aldehyde biosynthetic process
GO:0009409	0.00012	response to cold		GO:0016554	-2.3089	cytidine to uridine editing
GO:0009110	0.00013	vitamin biosynthetic process		GO:0044272	-2.2464	sulfur compound biosynthetic process
GO:0009228	0.00014	thiamine biosynthetic process		GO:0008272	-2.2351	sulfate transport
GO:0042724	0.00014	thiamine-containing compound biosynthetic process		GO:0046148	-2.1791	pigment biosynthetic process
GO:1901135	0.00015	carbohydrate derivative metabolic process		GO:0071577	-2.0706	zinc ion transmembrane transport
GO:0034660	0.00016	ncRNA metabolic process		GO:0010236	-2.0376	plastoquinone biosynthetic process
GO:0031425	0.00017	chloroplast RNA processing		GO:0051775	-2.0376	response to redox state
GO:0006778	0.00019	porphyrin-containing compound metabolic process		GO:0045165	-2.0128	cell fate commitment
GO:0042548	0.00022	regulation of photosynthesis, light reaction
GO:0009617	0.00023	response to bacterium
GO:0006766	0.00023	vitamin metabolic process
GO:0006468	0.00024	protein phosphorylation
GO:0009605	0.00029	response to external stimulus
GO:0005978	0.00029	glycogen biosynthetic process
GO:0030091	0.00029	protein repair
GO:0051188	0.0003	cofactor biosynthetic process
GO:0072527	0.00031	pyrimidine-containing compound metabolic process
GO:0000413	0.00032	protein peptidyl-prolyl isomerization
GO:0009112	0.00034	nucleobase metabolic process
GO:0042364	0.00035	water-soluble vitamin biosynthetic process
GO:0050896	0.00037	response to stimulus
GO:0048544	0.00039	recognition of pollen
GO:0043467	0.00039	regulation of generation of precursor metabolites and energy
GO:0015994	0.0004	chlorophyll metabolic process
GO:0005977	0.00041	glycogen metabolic process
GO:0006112	0.00041	energy reserve metabolic process
GO:0044085	0.00043	cellular component biogenesis
GO:0008037	0.00046	cell recognition
GO:0010206	0.00048	photosystem II repair
GO:0001510	0.00049	RNA methylation
GO:0018208	0.00054	peptidyl-proline modification
GO:0042742	0.00057	defense response to bacterium
GO:0055086	0.00058	nucleobase-containing small molecule metabolic process
GO:0044238	0.0006	primary metabolic process
GO:0006767	0.00066	water-soluble vitamin metabolic process
GO:0006207	0.00069	'de novo' pyrimidine nucleobase biosynthetic process
GO:0005996	0.00069	monosaccharide metabolic process
GO:0033013	0.00073	tetrapyrrole metabolic process
GO:0009875	0.00074	pollen-pistil interaction
GO:0019856	0.00076	pyrimidine nucleobase biosynthetic process
GO:0045454	0.00078	cell redox homeostasis
GO:0043207	0.00081	response to external biotic stimulus
GO:0051707	0.00081	response to other organism
GO:0010135	0.00082	ureide metabolic process
GO:0010136	0.00082	ureide catabolic process
GO:0043605	0.00082	cellular amide catabolic process
GO:0044205	0.00082	'de novo' UMP biosynthetic process
GO:0009119	0.00096	ribonucleoside metabolic process
GO:1901615	0.00102	organic hydroxy compound metabolic process
GO:0046112	0.00108	nucleobase biosynthetic process
GO:0009116	0.00113	nucleoside metabolic process
GO:0009411	0.00115	response to UV
GO:0043623	0.00118	cellular protein complex assembly
GO:0071214	0.0012	cellular response to abiotic stimulus
GO:0006772	0.00123	thiamine metabolic process
GO:0042723	0.00123	thiamine-containing compound metabolic process
GO:0016051	0.00125	carbohydrate biosynthetic process
GO:0019725	0.00125	cellular homeostasis
GO:0007154	0.00129	cell communication
GO:0005983	0.00141	starch catabolic process
GO:0043648	0.00145	dicarboxylic acid metabolic process
GO:0019318	0.00149	hexose metabolic process
GO:0006400	0.00153	tRNA modification
GO:0006396	0.00171	RNA processing
GO:0006549	0.00214	isoleucine metabolic process
GO:0009071	0.00214	serine family amino acid catabolic process
GO:0009097	0.00214	isoleucine biosynthetic process
GO:0019852	0.00214	L-ascorbic acid metabolic process
GO:0019853	0.00214	L-ascorbic acid biosynthetic process
GO:0010608	0.0022	posttranscriptional regulation of gene expression
GO:0044710	0.00221	single-organism metabolic process
GO:0006006	0.00254	glucose metabolic process
GO:1903825	0.00255	organic acid transmembrane transport
GO:0009773	0.0026	photosynthetic electron transport in photosystem I
GO:0007020	0.00263	microtubule nucleation
GO:0072521	0.00272	purine-containing compound metabolic process
GO:1901657	0.00274	glycosyl compound metabolic process
GO:0006952	0.00276	defense response
GO:0008610	0.00284	lipid biosynthetic process
GO:0042440	0.00304	pigment metabolic process
GO:0006857	0.00316	oligopeptide transport
GO:0015833	0.00316	peptide transport
GO:0072330	0.0032	monocarboxylic acid biosynthetic process
GO:0007005	0.00323	mitochondrion organization
GO:0034285	0.00336	response to disaccharide
GO:0009117	0.00347	nucleotide metabolic process
GO:0009743	0.00348	response to carbohydrate
GO:0006145	0.00353	purine nucleobase catabolic process
GO:0042816	0.00353	vitamin B6 metabolic process
GO:0042819	0.00353	vitamin B6 biosynthetic process
GO:0006790	0.00364	sulfur compound metabolic process
GO:0098542	0.0037	defense response to other organism
GO:0072348	0.0037	sulfur compound transport
GO:0006633	0.00372	fatty acid biosynthetic process
GO:0006206	0.00379	pyrimidine nucleobase metabolic process
GO:0009944	0.00379	polarity specification of adaxial/abaxial axis
GO:0030488	0.00379	tRNA methylation
GO:0046132	0.00379	pyrimidine ribonucleoside biosynthetic process
GO:0046134	0.00379	pyrimidine nucleoside biosynthetic process
GO:0006779	0.00403	porphyrin-containing compound biosynthetic process
GO:0006073	0.00417	cellular glucan metabolic process
GO:0044042	0.00417	glucan metabolic process
GO:0009637	0.00419	response to blue light
GO:0009069	0.00438	serine family amino acid metabolic process
GO:0009085	0.00445	lysine biosynthetic process
GO:0009089	0.00445	lysine biosynthetic process via diaminopimelate
GO:0046451	0.00445	diaminopimelate metabolic process
GO:0006081	0.00474	cellular aldehyde metabolic process
GO:0000256	0.00483	allantoin catabolic process
GO:0000963	0.00483	mitochondrial RNA processing
GO:0010258	0.00483	NADH dehydrogenase complex (plastoquinone) assembly
GO:0031116	0.00483	positive regulation of microtubule polymerization
GO:0042753	0.00483	positive regulation of circadian rhythm
GO:0045912	0.00483	negative regulation of carbohydrate metabolic process
GO:0070272	0.00483	proton-transporting ATP synthase complex biogenesis
GO:1901617	0.00484	organic hydroxy compound biosynthetic process
GO:0007623	0.00484	circadian rhythm
GO:0048511	0.00484	rhythmic process
GO:0006222	0.00491	UMP biosynthetic process
GO:0009173	0.00491	pyrimidine ribonucleoside monophosphate metabolic process
GO:0009174	0.00491	pyrimidine ribonucleoside monophosphate biosynthetic process
GO:0016554	0.00491	cytidine to uridine editing
GO:0046049	0.00491	UMP metabolic process
GO:0046184	0.00491	aldehyde biosynthetic process
GO:0000154	0.00495	rRNA modification
GO:0009638	0.00495	phototropism
GO:0009066	0.00564	aspartate family amino acid metabolic process
GO:0009767	0.00567	photosynthetic electron transport chain
GO:0044272	0.00567	sulfur compound biosynthetic process
GO:0008272	0.00582	sulfate transport
GO:0009250	0.0064	glucan biosynthetic process
GO:0006753	0.00648	nucleoside phosphate metabolic process
GO:0046148	0.00662	pigment biosynthetic process
GO:0006213	0.00673	pyrimidine nucleoside metabolic process
GO:0010207	0.00673	photosystem II assembly
GO:0046131	0.00673	pyrimidine ribonucleoside metabolic process
GO:0006108	0.00714	malate metabolic process
GO:0006553	0.00714	lysine metabolic process
GO:0009765	0.00714	photosynthesis, light harvesting
GO:0009744	0.00717	response to sucrose
GO:0010043	0.00725	response to zinc ion
GO:1901137	0.00737	carbohydrate derivative biosynthetic process
GO:0010114	0.00739	response to red light
GO:1901605	0.00742	alpha-amino acid metabolic process
GO:0015995	0.00749	chlorophyll biosynthetic process
GO:0008652	0.0075	cellular amino acid biosynthetic process
GO:0019693	0.00817	ribose phosphate metabolic process
GO:0055088	0.0085	lipid homeostasis
GO:0071577	0.0085	zinc II ion transmembrane transport
GO:0009943	0.00858	adaxial/abaxial axis specification
GO:0065001	0.00858	specification of axis polarity
GO:0006721	0.00864	terpenoid metabolic process
GO:0010236	0.00917	plastoquinone biosynthetic process
GO:0051775	0.00917	response to redox state
GO:0016553	0.00951	base conversion or substitution editing
GO:0031167	0.00951	rRNA methylation
GO:0042274	0.00951	ribosomal small subunit biogenesis
GO:0071484	0.00951	cellular response to light intensity
GO:0045165	0.00971	cell fate commitment
GO:0003333	0.00986	amino acid transmembrane transport
GO:0009259	0.00993	ribonucleotide metabolic process

## Sheet: GO age-dark down only
REG-MAP				REVIGO
GO.ID	p-value	Term		GO.ID	Log10 Value	Name
GO:0071554	2.6e-14	cell wall organization or biogenesis		GO:0071554	-13.585	cell wall organization or biogenesis
GO:0042546	1e-12	cell wall biogenesis		GO:0042546	-12	cell wall biogenesis
GO:0071669	4.1e-12	plant-type cell wall organization or biogenesis		GO:0015979	-11.2441	photosynthesis
GO:0015979	5.7e-12	photosynthesis		GO:0009698	-10.2007	phenylpropanoid metabolic process
GO:0009698	6.3e-11	phenylpropanoid metabolic process		GO:0005975	-9.8539	carbohydrate metabolic process
GO:0044264	7.6e-11	cellular polysaccharide metabolic process		GO:0005976	-9.6383	polysaccharide metabolic process
GO:0005975	1.4e-10	carbohydrate metabolic process		GO:0018298	-9.4815	protein-chromophore linkage
GO:0005976	2.3e-10	polysaccharide metabolic process		GO:0019748	-9.2676	secondary metabolic process
GO:0018298	3.3e-10	protein-chromophore linkage		GO:0006468	-8	protein phosphorylation
GO:0019748	5.4e-10	secondary metabolic process		GO:0045229	-6.8239	external encapsulating structure organization
GO:0009834	1.9e-09	plant-type secondary cell wall biogenesis		GO:0009768	-5.1135	photosynthesis, light harvesting in photosystem I
GO:0009699	2.5e-09	phenylpropanoid biosynthetic process		GO:0006558	-4.6198	L-phenylalanine metabolic process
GO:0006468	1e-08	protein phosphorylation		GO:1902221	-4.6198	erythrose 4-phosphate/phosphoenolpyruvate family amino acid metabolic process
GO:0010410	2.1e-08	hemicellulose metabolic process		GO:0009607	-4.4437	response to biotic stimulus
GO:0044550	2.1e-08	secondary metabolite biosynthetic process		GO:0010025	-4.3979	wax biosynthetic process
GO:0009808	2.4e-08	lignin metabolic process		GO:0006793	-4.1612	phosphorus metabolic process
GO:0006073	2.9e-08	cellular glucan metabolic process		GO:0009416	-3.9586	response to light stimulus
GO:0044042	2.9e-08	glucan metabolic process		GO:0010143	-3.8539	cutin biosynthetic process
GO:0044036	3.6e-08	cell wall macromolecule metabolic process		GO:0042873	-3.5686	aldonate transmembrane transport
GO:0044262	4.8e-08	cellular carbohydrate metabolic process		GO:0009058	-3.3872	biosynthetic process
GO:0033692	6e-08	cellular polysaccharide biosynthetic process		GO:0042537	-3.1192	benzene-containing compound metabolic process
GO:0009832	6.8e-08	plant-type cell wall biogenesis		GO:0043412	-3.1024	macromolecule modification
GO:0071555	8.6e-08	cell wall organization		GO:0006629	-3.0132	lipid metabolic process
GO:0045229	1.5e-07	external encapsulating structure organization		GO:0010374	-3.0044	stomatal complex development
GO:0034637	3.1e-07	cellular carbohydrate biosynthetic process		GO:2000652	-2.9586	regulation of secondary cell wall biogenesis
GO:0000271	4.3e-07	polysaccharide biosynthetic process		GO:0046620	-2.9431	regulation of organ growth
GO:0010383	4.7e-07	cell wall polysaccharide metabolic process		GO:0048544	-2.9245	recognition of pollen
GO:0009800	1.4e-06	cinnamic acid biosynthetic process		GO:0008037	-2.8827	cell recognition
GO:0009803	1.4e-06	cinnamic acid metabolic process		GO:0009628	-2.8729	response to abiotic stimulus
GO:0046271	1.5e-06	phenylpropanoid catabolic process		GO:0010033	-2.7545	response to organic substance
GO:0046274	1.5e-06	lignin catabolic process		GO:0002682	-2.7033	regulation of immune system process
GO:0009664	2.8e-06	plant-type cell wall organization		GO:1903338	-2.6882	regulation of cell wall organization or biogenesis
GO:0045491	2.9e-06	xylan metabolic process		GO:0031349	-2.6716	positive regulation of defense response
GO:0009768	7.7e-06	photosynthesis, light harvesting in photosystem I		GO:0051707	-2.6038	response to other organism
GO:0016310	8.4e-06	phosphorylation		GO:0055114	-2.5817	(obsolete) oxidation-reduction process
GO:0016051	1e-05	carbohydrate biosynthetic process		GO:0042335	-2.5751	cuticle development
GO:0045492	1.4e-05	xylan biosynthetic process		GO:0015717	-2.5654	triose phosphate transport
GO:0030244	1.8e-05	cellulose biosynthetic process		GO:0072593	-2.4461	reactive oxygen species metabolic process
GO:0006558	2.4e-05	L-phenylalanine metabolic process		GO:0002252	-2.3788	immune effector process
GO:0009765	2.4e-05	photosynthesis, light harvesting		GO:0009446	-2.3468	putrescine biosynthetic process
GO:1902221	2.4e-05	erythrose 4-phosphate/phosphoenolpyruvate family amino acid metabolic process		GO:0046244	-2.3468	salicylic acid catabolic process
GO:0009250	2.8e-05	glucan biosynthetic process		GO:0042744	-2.3316	hydrogen peroxide catabolic process
GO:0009607	3.6e-05	response to biotic stimulus		GO:0009072	-2.3224	aromatic amino acid family metabolic process
GO:0006464	4e-05	cellular protein modification process		GO:0043094	-2.3161	cellular metabolic compound salvage
GO:0036211	4e-05	protein modification process		GO:0042221	-2.2933	response to chemical
GO:0010025	4e-05	wax biosynthetic process		GO:0042549	-2.2857	photosystem II stabilization
GO:0006796	5.6e-05	phosphate-containing compound metabolic process		GO:0009056	-2.2733	catabolic process
GO:0006559	6.4e-05	L-phenylalanine catabolic process		GO:0072330	-2.2083	monocarboxylic acid biosynthetic process
GO:1902222	6.4e-05	erythrose 4-phosphate/phosphoenolpyruvate family amino acid catabolic process		GO:0006270	-2.1891	DNA replication initiation
GO:0010166	6.5e-05	wax metabolic process		GO:0050896	-2.1884	response to stimulus
GO:0006793	6.9e-05	phosphorus metabolic process		GO:0009719	-2.1096	response to endogenous stimulus
GO:0030243	7e-05	cellulose metabolic process		GO:0007154	-2.083	cell communication
GO:0051274	7.2e-05	beta-glucan biosynthetic process		GO:0010200	-2.054	response to chitin
GO:0009416	0.00011	response to light stimulus		GO:0009853	-2.0467	photorespiration
GO:0009314	0.00013	response to radiation
GO:0010143	0.00014	cutin biosynthetic process
GO:0051273	0.00018	beta-glucan metabolic process
GO:0009809	0.00021	lignin biosynthetic process
GO:0010411	0.00027	xyloglucan metabolic process
GO:0042873	0.00027	aldonate transport
GO:0015714	0.0003	phosphoenolpyruvate transport
GO:0044711	0.00041	single-organism biosynthetic process
GO:0044038	0.0006	cell wall macromolecule biosynthetic process
GO:0070589	0.0006	cellular component macromolecule biosynthetic process
GO:0070592	0.0006	cell wall polysaccharide biosynthetic process
GO:0009645	0.00072	response to low light intensity stimulus
GO:0042537	0.00076	benzene-containing compound metabolic process
GO:0019684	0.00079	photosynthesis, light reaction
GO:0043412	0.00079	macromolecule modification
GO:0009644	0.00092	response to high light intensity
GO:0006629	0.00097	lipid metabolic process
GO:0010374	0.00099	stomatal complex development
GO:0009642	0.0011	response to light intensity
GO:2000652	0.0011	regulation of secondary cell wall biogenesis
GO:0046620	0.00114	regulation of organ growth
GO:0048544	0.00119	recognition of pollen
GO:0008037	0.00131	cell recognition
GO:0009628	0.00134	response to abiotic stimulus
GO:0009875	0.00171	pollen-pistil interaction
GO:0010033	0.00176	response to organic substance
GO:2000038	0.00194	regulation of stomatal complex development
GO:0002682	0.00198	regulation of immune system process
GO:0000272	0.00199	polysaccharide catabolic process
GO:1903338	0.00205	regulation of cell wall organization or biogenesis
GO:0031349	0.00213	positive regulation of defense response
GO:0009074	0.0023	aromatic amino acid family catabolic process
GO:0043207	0.00249	response to external biotic stimulus
GO:0051707	0.00249	response to other organism
GO:0045088	0.00256	regulation of innate immune response
GO:0055114	0.00262	oxidation-reduction process
GO:0042335	0.00266	cuticle development
GO:0045089	0.00271	positive regulation of innate immune response
GO:0015713	0.00272	phosphoglycerate transport
GO:0015717	0.00272	triose phosphate transport
GO:0010218	0.00314	response to far red light
GO:0002684	0.00323	positive regulation of immune system process
GO:0010114	0.00323	response to red light
GO:0050778	0.00323	positive regulation of immune response
GO:0072593	0.00358	reactive oxygen species metabolic process
GO:0050776	0.00375	regulation of immune response
GO:0002252	0.00418	immune effector process
GO:0009445	0.0045	putrescine metabolic process
GO:0009446	0.0045	putrescine biosynthetic process
GO:0009714	0.0045	chalcone metabolic process
GO:0009715	0.0045	chalcone biosynthetic process
GO:0046244	0.0045	salicylic acid catabolic process
GO:0042744	0.00466	hydrogen peroxide catabolic process
GO:0009072	0.00476	aromatic amino acid family metabolic process
GO:0043094	0.00483	cellular metabolic compound salvage
GO:0042221	0.00509	response to chemical
GO:0042549	0.00518	photosystem II stabilization
GO:0044712	0.00533	single-organism catabolic process
GO:0044723	0.00587	single-organism carbohydrate metabolic process
GO:0072330	0.00619	monocarboxylic acid biosynthetic process
GO:0006270	0.00647	DNA replication initiation
GO:1901698	0.00648	response to nitrogen compound
GO:0050896	0.00648	response to stimulus
GO:0042743	0.00671	hydrogen peroxide metabolic process
GO:0009624	0.00712	response to nematode
GO:0015718	0.00712	monocarboxylic acid transport
GO:0009719	0.00777	response to endogenous stimulus
GO:0002218	0.0079	activation of innate immune response
GO:0002253	0.0079	activation of immune response
GO:1901700	0.00812	response to oxygen-containing compound
GO:0007154	0.00826	cell communication
GO:0010200	0.00883	response to chitin
GO:0009853	0.00898	photorespiration

## Sheet: GO dark up only
REG-MAP				REVIGO
GO.ID	p-value	Description		GO.ID	Log10 Value	Description
GO:0009628	1.4e-16	response to abiotic stimulus		GO:0009628	-15.8539	response to abiotic stimulus
GO:1901700	4.1e-14	response to oxygen-containing compound		GO:1901700	-13.3872	response to oxygen-containing compound
GO:0042221	8.7e-13	response to chemical		GO:0042221	-12.0605	response to chemical
GO:0050896	7.5e-12	response to stimulus		GO:0050896	-11.1249	response to stimulus
GO:0001101	6.2e-11	response to acid chemical		GO:0006914	-9.2218	autophagy
GO:0010035	3.9e-10	response to inorganic substance		GO:0006970	-7.7447	response to osmotic stress
GO:0006914	6e-10	autophagy		GO:0009607	-7.6778	response to biotic stimulus
GO:0010033	1.5e-08	response to organic substance		GO:0009605	-7.4685	response to external stimulus
GO:0006970	1.8e-08	response to osmotic stress		GO:0009719	-7.2291	response to endogenous stimulus
GO:0009607	2.1e-08	response to biotic stimulus		GO:0007568	-6.6021	aging
GO:0009605	3.4e-08	response to external stimulus		GO:0098542	-6.5686	defense response to other organism
GO:0009719	5.9e-08	response to endogenous stimulus		GO:0010260	-5.3279	animal organ senescence
GO:0006950	1.1e-07	response to stress		GO:0048583	-5.0315	regulation of response to stimulus
GO:0033993	2.5e-07	response to lipid		GO:0009987	-4.6778	cellular process
GO:0007568	2.5e-07	aging		GO:0007033	-4.2007	vacuole organization
GO:0098542	2.7e-07	defense response to other organism		GO:0016265	-4.0458	(obsolete) death
GO:0009725	3.1e-07	response to hormone		GO:0008219	-4.0458	cell death
GO:0009415	8.4e-07	response to water		GO:0006629	-4.0315	lipid metabolic process
GO:0009414	9.7e-07	response to water deprivation		GO:0070647	-4	protein modification by small protein conjugation or removal
GO:0009651	1.8e-06	response to salt stress		GO:0012501	-3.699	programmed cell death
GO:0043207	2.1e-06	response to external biotic stimulus		GO:0030001	-3.6576	metal ion transport
GO:0051707	2.1e-06	response to other organism		GO:0048522	-3.5229	positive regulation of cellular process
GO:0071248	2.4e-06	cellular response to metal ion		GO:0016567	-3.5086	protein ubiquitination
GO:0097305	4.4e-06	response to alcohol		GO:0048518	-3.4559	positive regulation of biological process
GO:0009266	4.5e-06	response to temperature stimulus		GO:0009611	-3.4318	response to wounding
GO:0010150	4.7e-06	leaf senescence		GO:0044281	-3.4202	small molecule metabolic process
GO:0010260	4.7e-06	organ senescence		GO:0009308	-3.4202	amine metabolic process
GO:0048583	9.3e-06	regulation of response to stimulus		GO:0009056	-3.3279	catabolic process
GO:0009737	1.1e-05	response to abscisic acid		GO:0051241	-3.3279	negative regulation of multicellular organismal process
GO:0009620	1.3e-05	response to fungus		GO:0050789	-3.301	regulation of biological process
GO:0070887	1.3e-05	cellular response to chemical stimulus		GO:0010118	-3.2757	stomatal movement
GO:0044763	2.1e-05	single-organism cellular process		GO:0050793	-3.1938	regulation of developmental process
GO:0009723	2.5e-05	response to ethylene		GO:0048587	-3.0862	regulation of short-day photoperiodism, flowering
GO:0009991	2.6e-05	response to extracellular stimulus		GO:0046487	-2.821	glyoxylate metabolic process
GO:0071241	3.6e-05	cellular response to inorganic substance		GO:0043620	-2.821	regulation of DNA-templated transcription in response to stress
GO:0031667	3.7e-05	response to nutrient levels		GO:0010200	-2.7905	response to chitin
GO:0071229	4.4e-05	cellular response to acid chemical		GO:0090332	-2.7496	stomatal closure
GO:0048731	5.7e-05	system development		GO:0044262	-2.7033	cellular carbohydrate metabolic process
GO:0009408	6.2e-05	response to heat		GO:0009939	-2.6696	positive regulation of gibberellic acid mediated signaling pathway
GO:0007033	6.3e-05	vacuole organization		GO:0034032	-2.6676	purine nucleoside bisphosphate metabolic process
GO:1901701	8.4e-05	cellular response to oxygen-containing compound		GO:0009694	-2.6676	jasmonic acid metabolic process
GO:0008219	9e-05	cell death		GO:0006357	-2.6536	regulation of transcription by RNA polymerase II
GO:0016265	9e-05	death		GO:0050801	-2.6498	ion homeostasis
GO:0006629	9.3e-05	lipid metabolic process		GO:0051239	-2.6144	regulation of multicellular organismal process
GO:0070647	0.0001	protein modification by small protein conjugation or removal		GO:0002376	-2.6038	immune system process
GO:0044248	0.00011	cellular catabolic process		GO:0010565	-2.5528	regulation of cellular ketone metabolic process
GO:0050832	0.00018	defense response to fungus		GO:0048519	-2.5331	negative regulation of biological process
GO:0010038	0.00018	response to metal ion		GO:0009693	-2.5171	ethylene biosynthetic process
GO:0048513	0.00019	organ development		GO:2000070	-2.5171	regulation of response to water deprivation
GO:0012501	0.0002	programmed cell death		GO:0007034	-2.4559	vacuolar transport
GO:0030001	0.00022	metal ion transport		GO:0044106	-2.4306	cellular amine metabolic process
GO:0032870	0.00026	cellular response to hormone stimulus		GO:0006810	-2.4012	transport
GO:0016054	0.00027	organic acid catabolic process		GO:0040008	-2.3696	regulation of growth
GO:0046395	0.00027	carboxylic acid catabolic process		GO:0061077	-2.3429	chaperone-mediated protein folding
GO:0048522	0.0003	positive regulation of cellular process		GO:0016126	-2.3429	sterol biosynthetic process
GO:0016567	0.00031	protein ubiquitination		GO:0044764	-2.327	multi-organism cellular process
GO:0048366	0.00033	leaf development		GO:0046907	-2.3197	intracellular transport
GO:0032446	0.00035	protein modification by small protein conjugation		GO:0065007	-2.3116	biological regulation
GO:0048518	0.00035	positive regulation of biological process		GO:0061025	-2.2741	membrane fusion
GO:0071495	0.00036	cellular response to endogenous stimulus		GO:0009660	-2.2581	amyloplast organization
GO:0009611	0.00037	response to wounding		GO:0042732	-2.2581	D-xylose metabolic process
GO:0009308	0.00038	amine metabolic process		GO:0051338	-2.2457	regulation of transferase activity
GO:0044281	0.00038	small molecule metabolic process		GO:0009845	-2.2426	seed germination
GO:0071396	0.00044	cellular response to lipid		GO:0051179	-2.1952	localization
GO:0044712	0.00047	single-organism catabolic process		GO:0097164	-2.1871	ammonium ion metabolic process
GO:0042594	0.00047	response to starvation		GO:0009937	-2.1838	regulation of gibberellic acid mediated signaling pathway
GO:0051241	0.00047	negative regulation of multicellular organismal process		GO:0006790	-2.1746	sulfur compound metabolic process
GO:0051093	0.00049	negative regulation of developmental process		GO:0006955	-2.1415	immune response
GO:0050789	0.0005	regulation of biological process		GO:0042762	-2.1062	regulation of sulfur metabolic process
GO:0044282	0.00051	small molecule catabolic process		GO:0051782	-2.1062	negative regulation of cell division
GO:0010118	0.00053	stomatal movement		GO:0006551	-2.0825	leucine metabolic process
GO:0050793	0.00064	regulation of developmental process		GO:1903046	-2.0386	meiotic cell cycle process
GO:0071310	0.00071	cellular response to organic substance
GO:0009814	0.00079	defense response, incompatible interaction
GO:0048587	0.00082	regulation of short-day photoperiodism, flowering
GO:0009753	0.00087	response to jasmonic acid
GO:0072329	0.00102	monocarboxylic acid catabolic process
GO:0016042	0.00108	lipid catabolic process
GO:0006813	0.00118	potassium ion transport
GO:0043620	0.00151	regulation of DNA-templated transcription in response to stress
GO:0046487	0.00151	glyoxylate metabolic process
GO:0051446	0.00151	positive regulation of meiotic cell cycle
GO:0010200	0.00162	response to chitin
GO:0048581	0.00162	negative regulation of post-embryonic development
GO:2000242	0.00173	negative regulation of reproductive process
GO:0090332	0.00178	stomatal closure
GO:0048827	0.0018	phyllome development
GO:0044262	0.00198	cellular carbohydrate metabolic process
GO:0009416	0.00199	response to light stimulus
GO:0044242	0.00207	cellular lipid catabolic process
GO:0009939	0.00214	positive regulation of gibberellic acid mediated signaling pathway
GO:0006635	0.00215	fatty acid beta-oxidation
GO:0009694	0.00215	jasmonic acid metabolic process
GO:0033865	0.00215	nucleoside bisphosphate metabolic process
GO:0033875	0.00215	ribonucleoside bisphosphate metabolic process
GO:0034032	0.00215	purine nucleoside bisphosphate metabolic process
GO:0006357	0.00222	regulation of transcription from RNA polymerase II promoter
GO:0031668	0.00224	cellular response to extracellular stimulus
GO:0050801	0.00224	ion homeostasis
GO:0051239	0.00243	regulation of multicellular organismal process
GO:0002376	0.00249	immune system process
GO:0044255	0.00265	cellular lipid metabolic process
GO:0010565	0.0028	regulation of cellular ketone metabolic process
GO:0048519	0.00293	negative regulation of biological process
GO:0009409	0.00298	response to cold
GO:0071804	0.00302	cellular potassium ion transport
GO:0071805	0.00302	potassium ion transmembrane transport
GO:0009692	0.00304	ethylene metabolic process
GO:0009693	0.00304	ethylene biosynthetic process
GO:0043449	0.00304	cellular alkene metabolic process
GO:0043450	0.00304	alkene biosynthetic process
GO:0045927	0.00304	positive regulation of growth
GO:1900673	0.00304	olefin metabolic process
GO:1900674	0.00304	olefin biosynthetic process
GO:2000070	0.00304	regulation of response to water deprivation
GO:0048878	0.00306	chemical homeostasis
GO:0048364	0.00312	root development
GO:0009314	0.00313	response to radiation
GO:0051234	0.0033	establishment of localization
GO:0071496	0.00333	cellular response to external stimulus
GO:0022622	0.00335	root system development
GO:0006082	0.00341	organic acid metabolic process
GO:0007034	0.0035	vacuolar transport
GO:0042542	0.0035	response to hydrogen peroxide
GO:0044106	0.00371	cellular amine metabolic process
GO:0031325	0.00376	positive regulation of cellular metabolic process
GO:0071215	0.00393	cellular response to abscisic acid stimulus
GO:0006810	0.00397	transport
GO:0031669	0.0042	cellular response to nutrient levels
GO:0098771	0.0042	inorganic ion homeostasis
GO:0000302	0.00427	response to reactive oxygen species
GO:0040008	0.00427	regulation of growth
GO:0043436	0.00428	oxoacid metabolic process
GO:0044765	0.00447	single-organism transport
GO:0019752	0.00452	carboxylic acid metabolic process
GO:0055075	0.00453	potassium ion homeostasis
GO:0009083	0.00454	branched-chain amino acid catabolic process
GO:0016126	0.00454	sterol biosynthetic process
GO:0061077	0.00454	chaperone-mediated protein folding
GO:0009893	0.00467	positive regulation of metabolic process
GO:0048367	0.0047	shoot system development
GO:0044764	0.00471	multi-organism cellular process
GO:0051130	0.00471	positive regulation of cellular component organization
GO:0045087	0.00474	innate immune response
GO:2000026	0.00475	regulation of multicellular organismal development
GO:1902582	0.00479	single-organism intracellular transport
GO:0065007	0.00488	biological regulation
GO:0008216	0.00504	spermidine metabolic process
GO:0008295	0.00504	spermidine biosynthetic process
GO:0042742	0.00522	defense response to bacterium
GO:0009062	0.00532	fatty acid catabolic process
GO:0061025	0.00532	membrane fusion
GO:0000045	0.00552	autophagosome assembly
GO:0000122	0.00552	negative regulation of transcription from RNA polymerase II promoter
GO:0009660	0.00552	amyloplast organization
GO:0016236	0.00552	macroautophagy
GO:0042732	0.00552	D-xylose metabolic process
GO:1902584	0.00552	positive regulation of response to water deprivation
GO:0048580	0.00567	regulation of post-embryonic development
GO:0051338	0.00568	regulation of transferase activity
GO:0009845	0.00572	seed germination
GO:0009267	0.00584	cellular response to starvation
GO:1901361	0.00589	organic cyclic compound catabolic process
GO:0055085	0.00599	transmembrane transport
GO:0009617	0.00616	response to bacterium
GO:1902578	0.00638	single-organism localization
GO:0051179	0.0064	localization
GO:0097164	0.0065	ammonium ion metabolic process
GO:0006623	0.00655	protein targeting to vacuole
GO:0009937	0.00655	regulation of gibberellic acid mediated signaling pathway
GO:0072665	0.00655	protein localization to vacuole
GO:0072666	0.00655	establishment of protein localization to vacuole
GO:0006790	0.00669	sulfur compound metabolic process
GO:0009648	0.00673	photoperiodism
GO:0009056	0.00688	catabolic process
GO:0007126	0.00689	meiotic nuclear division
GO:0019395	0.00692	fatty acid oxidation
GO:0009615	0.00695	response to virus
GO:0006955	0.00722	immune response
GO:0006816	0.00732	calcium ion transport
GO:1901698	0.00763	response to nitrogen compound
GO:0051321	0.00767	meiotic cell cycle
GO:0009739	0.00772	response to gibberellin
GO:0006012	0.00783	galactose metabolic process
GO:0042762	0.00783	regulation of sulfur metabolic process
GO:0051782	0.00783	negative regulation of cell division
GO:0005996	0.00813	monosaccharide metabolic process
GO:0034440	0.00815	lipid oxidation
GO:0006551	0.00827	leucine metabolic process
GO:0019319	0.00827	hexose biosynthetic process
GO:0051445	0.00827	regulation of meiotic cell cycle
GO:0051781	0.00827	positive regulation of cell division
GO:0055062	0.00827	phosphate ion homeostasis
GO:0072506	0.00827	trivalent inorganic anion homeostasis
GO:0071370	0.00887	cellular response to gibberellin stimulus
GO:0006464	0.00898	cellular protein modification process
GO:0036211	0.00898	protein modification process
GO:0006073	0.00912	cellular glucan metabolic process
GO:0044042	0.00912	glucan metabolic process
GO:1903046	0.00915	meiotic cell cycle process
GO:0071281	0.00915	cellular response to iron ion
GO:0010228	0.00917	vegetative to reproductive phase transition of meristem
GO:0097306	0.00917	cellular response to alcohol
GO:0006595	0.00931	polyamine metabolic process
GO:0048573	0.0094	photoperiodism, flowering
GO:0010629	0.00945	negative regulation of gene expression

## Sheet: GO age Up only
REG-MAP				REVIGO
GO.ID	p-value	Description		GO.ID	Log10 Value	Description
GO:0009657	1.6e-18	plastid organization		GO:0009657	-17.7959	plastid organization
GO:1901566	3.6e-11	organonitrogen compound biosynthetic process		GO:1901566	-10.4437	organonitrogen compound biosynthetic process
GO:0033014	7.8e-11	tetrapyrrole biosynthetic process		GO:0033014	-10.1079	tetrapyrrole biosynthetic process
GO:0009658	4e-10	chloroplast organization		GO:0009658	-9.3979	chloroplast organization
GO:0044271	5.4e-10	cellular nitrogen compound biosynthetic process		GO:0006801	-9.0862	superoxide metabolic process
GO:0006779	7.7e-10	porphyrin-containing compound biosynthetic process		GO:0033013	-7.8239	tetrapyrrole metabolic process
GO:0006801	8.2e-10	superoxide metabolic process		GO:0009058	-7.3372	biosynthetic process
GO:0032544	2.3e-09	plastid translation		GO:0006412	-7.1427	translation
GO:0044249	2.9e-09	cellular biosynthetic process		GO:0010467	-6.9586	gene expression
GO:1901576	5.9e-09	organic substance biosynthetic process		GO:0042793	-6.5686	plastid transcription
GO:0033013	1.5e-08	tetrapyrrole metabolic process		GO:1901564	-6.1024	organonitrogen compound metabolic process
GO:0009058	4.6e-08	biosynthetic process		GO:0043603	-6.0044	cellular amide metabolic process
GO:0006412	7.2e-08	translation		GO:1990748	-5.8539	cellular detoxification
GO:0043043	1e-07	peptide biosynthetic process		GO:0034641	-5.6021	cellular nitrogen compound metabolic process
GO:0010467	1.1e-07	gene expression		GO:0009451	-5.3665	RNA modification
GO:0006778	2e-07	porphyrin-containing compound metabolic process		GO:0006807	-5.0862	nitrogen compound metabolic process
GO:0006518	2.3e-07	peptide metabolic process		GO:0051188	-4.9586	(obsolete) cofactor biosynthetic process
GO:0042793	2.7e-07	transcription from plastid promoter		GO:0071457	-4.2218	cellular response to ozone
GO:0043604	3.1e-07	amide biosynthetic process		GO:0019747	-4.0506	regulation of isoprenoid metabolic process
GO:1901564	7.9e-07	organonitrogen compound metabolic process		GO:0006720	-3.8539	isoprenoid metabolic process
GO:0043603	9.9e-07	cellular amide metabolic process		GO:0042440	-3.7212	pigment metabolic process
GO:0034645	1.1e-06	cellular macromolecule biosynthetic process		GO:0009409	-3.699	response to cold
GO:0019430	1.4e-06	removal of superoxide radicals		GO:0009955	-3.3872	adaxial/abaxial pattern specification
GO:0071450	1.4e-06	cellular response to oxygen radical		GO:0051186	-3.2518	(obsolete) cofactor metabolic process
GO:0071451	1.4e-06	cellular response to superoxide		GO:0090322	-3.2518	regulation of superoxide metabolic process
GO:1990748	1.4e-06	cellular detoxification		GO:0019438	-3.2441	aromatic compound biosynthetic process
GO:0015995	1.4e-06	chlorophyll biosynthetic process		GO:0018130	-3.2147	heterocycle biosynthetic process
GO:0034641	2.5e-06	cellular nitrogen compound metabolic process		GO:0031425	-3.0506	chloroplast RNA processing
GO:0009059	4e-06	macromolecule biosynthetic process		GO:0019216	-2.9547	regulation of lipid metabolic process
GO:0009451	4.3e-06	RNA modification		GO:0009628	-2.9547	response to abiotic stimulus
GO:0000303	4.7e-06	response to superoxide		GO:0072528	-2.7747	pyrimidine-containing compound biosynthetic process
GO:0000305	4.7e-06	response to oxygen radical		GO:0009267	-2.762	cellular response to starvation
GO:0006807	8.2e-06	nitrogen compound metabolic process		GO:0042026	-2.7328	protein refolding
GO:0046148	9.9e-06	pigment biosynthetic process		GO:0008655	-2.7328	pyrimidine-containing compound salvage
GO:0051188	1.1e-05	cofactor biosynthetic process		GO:0071329	-2.7328	cellular response to sucrose stimulus
GO:0098754	1.3e-05	detoxification		GO:0048564	-2.5406	photosystem I assembly
GO:0044711	2.1e-05	single-organism biosynthetic process		GO:0043572	-2.3401	plastid fission
GO:0071457	6e-05	cellular response to ozone		GO:0046483	-2.3382	heterocycle metabolic process
GO:0019747	8.9e-05	regulation of isoprenoid metabolic process		GO:0072527	-2.3134	pyrimidine-containing compound metabolic process
GO:0015994	0.00014	chlorophyll metabolic process		GO:0044237	-2.2284	cellular metabolic process
GO:0006720	0.00014	isoprenoid metabolic process		GO:0015833	-2.1818	peptide transport
GO:0042440	0.00019	pigment metabolic process		GO:0044260	-2.1403	cellular macromolecule metabolic process
GO:0006364	0.00019	rRNA processing		GO:0006725	-2.118	cellular aromatic compound metabolic process
GO:0009409	0.0002	response to cold		GO:0035436	-2.061	triose phosphate transmembrane transport
GO:0006721	0.00022	terpenoid metabolic process		GO:0009987	-2.0575	cellular process
GO:0016072	0.00022	rRNA metabolic process
GO:0071484	0.00025	cellular response to light intensity
GO:0008299	0.00033	isoprenoid biosynthetic process
GO:0071482	0.00033	cellular response to light stimulus
GO:0009944	0.00038	polarity specification of adaxial/abaxial axis
GO:0009955	0.00041	adaxial/abaxial pattern specification
GO:0016070	0.00047	RNA metabolic process
GO:0034660	0.00048	ncRNA metabolic process
GO:0009636	0.00051	response to toxic substance
GO:0071478	0.00053	cellular response to radiation
GO:0051186	0.00056	cofactor metabolic process
GO:0071493	0.00056	cellular response to UV-B
GO:0090322	0.00056	regulation of superoxide metabolic process
GO:0019438	0.00057	aromatic compound biosynthetic process
GO:0016114	0.00057	terpenoid biosynthetic process
GO:0042254	0.00061	ribosome biogenesis
GO:0018130	0.00061	heterocycle biosynthetic process
GO:0034644	0.00061	cellular response to UV
GO:0009943	0.00066	adaxial/abaxial axis specification
GO:0065001	0.00066	specification of axis polarity
GO:0006996	0.00066	organelle organization
GO:0034470	0.00081	ncRNA processing
GO:0031425	0.00089	chloroplast RNA processing
GO:0016108	0.00093	tetraterpenoid metabolic process
GO:0016116	0.00093	carotenoid metabolic process
GO:0009628	0.00111	response to abiotic stimulus
GO:0019216	0.00111	regulation of lipid metabolic process
GO:0031669	0.0012	cellular response to nutrient levels
GO:0034614	0.00133	cellular response to reactive oxygen species
GO:1901362	0.00135	organic cyclic compound biosynthetic process
GO:0016036	0.00147	cellular response to phosphate starvation
GO:0043100	0.00153	pyrimidine nucleobase salvage
GO:0072528	0.00168	pyrimidine-containing compound biosynthetic process
GO:0009267	0.00173	cellular response to starvation
GO:0008655	0.00185	pyrimidine-containing compound salvage
GO:0042026	0.00185	protein refolding
GO:0071329	0.00185	cellular response to sucrose stimulus
GO:0022613	0.00189	ribonucleoprotein complex biogenesis
GO:0009416	0.00221	response to light stimulus
GO:0046890	0.00249	regulation of lipid biosynthetic process
GO:0009266	0.00287	response to temperature stimulus
GO:0048564	0.00288	photosystem I assembly
GO:0071324	0.00288	cellular response to disaccharide stimulus
GO:0010114	0.00332	response to red light
GO:0042594	0.00363	response to starvation
GO:0010020	0.00367	chloroplast fission
GO:0009314	0.00367	response to radiation
GO:0034599	0.00379	cellular response to oxidative stress
GO:0031668	0.00397	cellular response to extracellular stimulus
GO:0071214	0.00412	cellular response to abiotic stimulus
GO:0031167	0.00419	rRNA methylation
GO:0042886	0.00432	amide transport
GO:0010322	0.00446	regulation of isopentenyl diphosphate biosynthetic process, methylerythritol 4-phosphate pathway
GO:0071071	0.00446	regulation of phospholipid biosynthetic process
GO:1903725	0.00446	regulation of phospholipid metabolic process
GO:0043572	0.00457	plastid fission
GO:0046483	0.00459	heterocycle metabolic process
GO:0072527	0.00486	pyrimidine-containing compound metabolic process
GO:0009668	0.0049	plastid membrane organization
GO:0010027	0.0049	thylakoid membrane organization
GO:0071496	0.00496	cellular response to external stimulus
GO:0031667	0.00533	response to nutrient levels
GO:0010193	0.00562	response to ozone
GO:0000302	0.00572	response to reactive oxygen species
GO:0042273	0.00581	ribosomal large subunit biogenesis
GO:0044237	0.00591	cellular metabolic process
GO:0006857	0.00658	oligopeptide transport
GO:0009798	0.00658	axis specification
GO:0015833	0.00658	peptide transport
GO:0001510	0.00696	RNA methylation
GO:0044260	0.00724	cellular macromolecule metabolic process
GO:0044085	0.00732	cellular component biogenesis
GO:0006725	0.00762	cellular aromatic compound metabolic process
GO:0000154	0.00776	rRNA modification
GO:0010371	0.00869	regulation of gibberellin biosynthetic process
GO:0035436	0.00869	triose phosphate transmembrane transport
GO:0009987	0.00876	cellular process
GO:0016109	0.00966	tetraterpenoid biosynthetic process
GO:0016117	0.00966	carotenoid biosynthetic process

## Sheet: GO age-dark up only
REG-MAP				REVIGO
GO.ID	p-value	Description		GO.ID	Log10 Value	Description
GO:0055114	1.6e-17	oxidation-reduction process		GO:0055114	-16.7959	(obsolete) oxidation-reduction process
GO:0044710	1.6e-09	single-organism metabolic process		GO:0008152	-8.7959	metabolic process
GO:1901565	1.4e-08	organonitrogen compound catabolic process		GO:1901565	-7.8539	organonitrogen compound catabolic process
GO:0006855	2.7e-06	drug transmembrane transport		GO:0015893	-5.4949	drug transport
GO:0015893	3.2e-06	drug transport		GO:0042493	-5.4202	response to drug
GO:0042493	3.8e-06	response to drug		GO:0009056	-5.0044	catabolic process
GO:0044712	9.9e-06	single-organism catabolic process		GO:0009607	-4.4318	response to biotic stimulus
GO:0009607	3.7e-05	response to biotic stimulus		GO:0051187	-4.0969	(obsolete) cofactor catabolic process
GO:0051187	8e-05	cofactor catabolic process		GO:0034754	-3.8861	cellular hormone metabolic process
GO:0016054	0.0001	organic acid catabolic process		GO:0009605	-3.8539	response to external stimulus
GO:0046395	0.0001	carboxylic acid catabolic process		GO:0051707	-3.5229	response to other organism
GO:0034754	0.00013	cellular hormone metabolic process		GO:0006787	-3.2076	porphyrin-containing compound catabolic process
GO:0009605	0.00014	response to external stimulus		GO:0000041	-2.9355	transition metal ion transport
GO:0044282	0.00027	small molecule catabolic process		GO:0055085	-2.9101	transmembrane transport
GO:0043207	0.0003	response to external biotic stimulus		GO:0009308	-2.8928	amine metabolic process
GO:0051707	0.0003	response to other organism		GO:0006955	-2.8794	immune response
GO:1901136	0.00033	carbohydrate derivative catabolic process		GO:0042440	-2.752	pigment metabolic process
GO:1901606	0.00033	alpha-amino acid catabolic process		GO:0001101	-2.7305	response to acid chemical
GO:0044248	0.00039	cellular catabolic process		GO:1901806	-2.7212	beta-glucoside biosynthetic process
GO:1901700	0.00044	response to oxygen-containing compound		GO:0002376	-2.7122	immune system process
GO:0009063	0.00047	cellular amino acid catabolic process		GO:0046149	-2.4776	pigment catabolic process
GO:1901361	0.0005	organic cyclic compound catabolic process		GO:0006775	-2.4067	fat-soluble vitamin metabolic process
GO:0006787	0.00062	porphyrin-containing compound catabolic process		GO:0042362	-2.4067	fat-soluble vitamin biosynthetic process
GO:0033015	0.00062	tetrapyrrole catabolic process		GO:0019748	-2.2976	secondary metabolic process
GO:0009814	0.0007	defense response, incompatible interaction		GO:0016098	-2.2573	monoterpenoid metabolic process
GO:0042445	0.00087	hormone metabolic process		GO:0050810	-2.2573	regulation of steroid biosynthetic process
GO:0046700	0.00094	heterocycle catabolic process		GO:0015804	-2.2573	neutral amino acid transport
GO:0045087	0.00097	innate immune response		GO:0016099	-2.2573	monoterpenoid biosynthetic process
GO:0033993	0.00102	response to lipid		GO:0043617	-2.2573	cellular response to sucrose starvation
GO:0009690	0.00111	cytokinin metabolic process		GO:0006022	-2.248	aminoglycan metabolic process
GO:0000041	0.00116	transition metal ion transport		GO:0010345	-2.2449	suberin biosynthetic process
GO:0055085	0.00123	transmembrane transport		GO:1902930	-2.2449	regulation of alcohol biosynthetic process
GO:0009308	0.00128	amine metabolic process		GO:0051179	-2.2388	localization
GO:0006955	0.00132	immune response		GO:1901615	-2.1979	organic hydroxy compound metabolic process
GO:0042440	0.00177	pigment metabolic process		GO:0042221	-2.1203	response to chemical
GO:0001101	0.00186	response to acid chemical		GO:0006629	-2.1068	lipid metabolic process
GO:0006826	0.00187	iron ion transport		GO:0009064	-2.0721	glutamine family amino acid metabolic process
GO:0009068	0.0019	aspartate family amino acid catabolic process
GO:1900992	0.0019	(-)-secologanin metabolic process
GO:1900994	0.0019	(-)-secologanin biosynthetic process
GO:1901806	0.0019	beta-glucoside biosynthetic process
GO:0002376	0.00194	immune system process
GO:0050832	0.00207	defense response to fungus
GO:0044242	0.00207	cellular lipid catabolic process
GO:0097305	0.0026	response to alcohol
GO:0009737	0.00273	response to abscisic acid
GO:0009620	0.0028	response to fungus
GO:0019439	0.00297	aromatic compound catabolic process
GO:0098542	0.00306	defense response to other organism
GO:0044270	0.0033	cellular nitrogen compound catabolic process
GO:0006829	0.00333	zinc II ion transport
GO:0015996	0.00333	chlorophyll catabolic process
GO:0046149	0.00333	pigment catabolic process
GO:0009056	0.00391	catabolic process
GO:0006775	0.00392	fat-soluble vitamin metabolic process
GO:0010189	0.00392	vitamin E biosynthetic process
GO:0042360	0.00392	vitamin E metabolic process
GO:0042362	0.00392	fat-soluble vitamin biosynthetic process
GO:0010817	0.00504	regulation of hormone levels
GO:0019748	0.00504	secondary metabolic process
GO:0010422	0.00553	regulation of brassinosteroid biosynthetic process
GO:0015804	0.00553	neutral amino acid transport
GO:0016098	0.00553	monoterpenoid metabolic process
GO:0016099	0.00553	monoterpenoid biosynthetic process
GO:0016138	0.00553	glycoside biosynthetic process
GO:0019218	0.00553	regulation of steroid metabolic process
GO:0043617	0.00553	cellular response to sucrose starvation
GO:0050810	0.00553	regulation of steroid biosynthetic process
GO:0090030	0.00553	regulation of steroid hormone biosynthetic process
GO:1901804	0.00553	beta-glucoside metabolic process
GO:0006022	0.00565	aminoglycan metabolic process
GO:0010345	0.00569	suberin biosynthetic process
GO:1902930	0.00569	regulation of alcohol biosynthetic process
GO:0009753	0.00577	response to jasmonic acid
GO:0051179	0.00577	localization
GO:1901615	0.00634	organic hydroxy compound metabolic process
GO:0043436	0.00723	oxoacid metabolic process
GO:0006082	0.00755	organic acid metabolic process
GO:0042221	0.00758	response to chemical
GO:0006629	0.00782	lipid metabolic process
GO:0006879	0.00787	cellular iron ion homeostasis
GO:0055072	0.00823	iron ion homeostasis
GO:0009064	0.00847	glutamine family amino acid metabolic process
GO:0031669	0.00859	cellular response to nutrient levels
GO:1902578	0.00876	single-organism localization
