# Supplementary material for: Transcriptional Programs and Regulators Underlying Age-Dependent and Dark-Induced Senescence in Medicago truncatula
Source: Cells. 2022 May 6;11(9):1570. doi: 10.3390/cells11091570 (PMC9103780; doi:10.3390/cells11091570)
Supplement: Supplementary file 1 [file cells-11-01570-s001.zip › Supplementary Table S1. List of primers sequences used in the study.xlsx]

## Sheet: Oligos
Oligo Name	Oligo Sequence	Gene ID
MtRBCS-F	CCAACAATGACATTACCTCCATT	Medtr6g018300
MtRBCS-R	CCACACCTGCATACAGTTCAC
MtPaO-F	GCCTGGTGGCAAGTGGTT	Medtr4g057200
MtPaO-R	TCCCCGTCATATACCTTGTTTGA
MtNYE1-F	CCCAAAGGGACCACCAAAAT	Medtr5g011120
MtNYE1-R	AGCAGCACTCGCAAGTTTCTT
MtUBC9-F	GGTTGATTGCTCTTCTCTCCCC	Medtr7g116940
MtUBC9-R	AAGTGATTGCTCGTCCAACCC
MtPTB-F	CGCCTTGTCAGCATTGATGTC	Medtr3g090960
MtPTB-R	TGAACCAGTGCCTGGAATCCT
AtNAP-F	ACAATTTACTATTCTAGTCGAATGGAAGTAACTTCCCAATCTAC	At1g69490
AtNAP-R	TTGCGGACTCTAGCATGGCCGCTAAAACTTAAACATCGCTTGAC
ORE1-F	ACAATTTACTATTCTAGTCGAATGGATTACGAGGCATCAAG	At5g39610
ORE1-R	TTGCGGACTCTAGCATGGCCGTCAGAAATTCCAAACGCAATCC
SA-TF1-F	ACAATTTACTATTCTAGTCGAATGATGGAGGAAGAAGAGAAT	Medtr3g092150
SA-TF1-R	TTGCGGACTCTAGCATGGCCGTCAAGTCCAAAAATCCAACCATT
SA-TF2-F	ACAATTTACTATTCTAGTCGAATGAAGAACAATAATTCTAAGAG	Medtr3g450310
SA-TF2-R	TTGCGGACTCTAGCATGGCCGTCAAATTGATAGGTCCAAGTTTATAT
SA-TF4-F	ACAATTTACTATTCTAGTCGAATGGAAAACGTTTCAGTCTTATC	Medtr4g108760
SA-TF4-R	TTGCGGACTCTAGCATGGCCGTTAGTAATTCCACAAATTACCATC
SA-TF5-F	ACAATTTACTATTCTAGTCGAATGGAGAGTAGTGCAAGCTC	Medtr4g081870
SA-TF5-R	TTGCGGACTCTAGCATGGCCGTTATGCTAAATAATTATGCATTTGTTTC
SA-TF7-F	ACAATTTACTATTCTAGTCGAATGGAGAAGAAAGACATGGG	Medtr1g086790
SA-TF7-R	TTGCGGACTCTAGCATGGCCGCTACTTTTCTTTCAACATATGTGAAG
SA-TF8-F	ACAATTTACTATTCTAGTCGAATGATACCACCACCTTATCGC	Medtr4g126350
SA-TF8-R	TTGCGGACTCTAGCATGGCCGTCAACCATGGACTAATCCATAAGA
SA-TF10-F	ACAATTTACTATTCTAGTCGAATGGCTTCCAGTGTTGAAAAAC	Medtr7g092750
SA-TF10-R	TTGCGGACTCTAGCATGGCCGCTATTCTTGACGAGGGCGTG
SA-TF11-F	ACAATTTACTATTCTAGTCGAATGGTTTCTGCTCTCTCTCAA	Medtr7g020980
SA-TF11-R	TTGCGGACTCTAGCATGGCCGCTACTCGCCCGGTGGGTGAC
SA-TF12-F	ACAATTTACTATTCTAGTCGAATGGAGGTAGATTGGGATCTAC	Medtr8g028565
SA-TF12-R	TTGCGGACTCTAGCATGGCCGTCATTGGCCACCACAAGCAG
SA-TF13-F	ACAATTTACTATTCTAGTCGAATGGGTAGAGAAGAAGAATCCA	Medtr4g094412
SA-TF13-R	TTGCGGACTCTAGCATGGCCGTCAATTGTTGCTACCATGAGTAG
SA-TF14-F	ACAATTTACTATTCTAGTCGAATGGATGTAAAAGGAAGAGGAAG	Medtr4g123040
SA-TF14-R	TTGCGGACTCTAGCATGGCCGTTACATTGTATCGTTCATGAGTTG
SA-TF16-F	ACAATTTACTATTCTAGTCGAATGTTTGATTCTAGCAACTCAGAG	Medtr7g110810
SA-TF16-R	TTGCGGACTCTAGCATGGCCGCTAGCCACATGTCCTTCCAG
SA-TF17-F	ACAATTTACTATTCTAGTCGAATGTCCAGAGAAAGGGAGAGAT	Medtr3g094690
SA-TF17-R	TTGCGGACTCTAGCATGGCCGTTAACCAAAATAGGAAATATTATCATCAC
SA-TF18-F	ACAATTTACTATTCTAGTCGAATGTCTTGTCCTATGGTTTCAG	Medtr1g098460
SA-TF18-R	TTGCGGACTCTAGCATGGCCGTCAACTAGAAGAAGGTGGTGG
SA-TF19-F	ACAATTTACTATTCTAGTCGAATGCATATGATGAGTAGCTCTTAC	Medtr1g070020
SA-TF19-R	TTGCGGACTCTAGCATGGCCGTTAACAACCTGATGATTTGAACTTG
SA-TF20-F	ACAATTTACTATTCTAGTCGAATGGGAGTTCCAGAGAGAGA	Medtr8g059170
SA-TF20-R	TTGCGGACTCTAGCATGGCCGTTAATGACCCGAATACCCAAAC
SA-TF22-F	ACAATTTACTATTCTAGTCGAATGAAGAGAGAAAGAGAAACTGAT	Medtr1g115345
SA-TF22-R	TTGCGGACTCTAGCATGGCCGTTAATGAATTGAATTGAAACGATC
SA-TF25-F	ACAATTTACTATTCTAGTCGAATGGGAAGGGCACCTTGCT	Medtr3g103570
SA-TF25-R	TTGCGGACTCTAGCATGGCCGCTAGCTAGGGTAAGTACTCAAC
SA-TF26-F	ACAATTTACTATTCTAGTCGAATGGACATGGAAGGAATAATAG	Medtr2g084315
SA-TF26-R	TTGCGGACTCTAGCATGGCCGCTAATAATGGCAACCCACCAA
SA-TF27-F	ACAATTTACTATTCTAGTCGAATGGAAGTGGAAGGAAGTG	Medtr2g033170
SA-TF27-R	TTGCGGACTCTAGCATGGCCGTCACATGTTGTCATTGGGATG
SA-TF28-F	ACAATTTACTATTCTAGTCGAATGGAATATAGCCAATATAGTAGTT	Medtr8g026960
SA-TF28-R	TTGCGGACTCTAGCATGGCCGTCAAGACCAAAAGTCCCACC
SA-TF29-F	ACAATTTACTATTCTAGTCGAATGCAAACCAAAGAGATTAATACA	Medtr7g017880
SA-TF29-R	TTGCGGACTCTAGCATGGCCGTTAGTTTGAAGAATCAGATTTAACA
SA-TF30-F	ACAATTTACTATTCTAGTCGAATGGCTTTAGAATTACAAACTC	Medtr1g106730
SA-TF30-R	TTGCGGACTCTAGCATGGCCGCTACACCGTTTCATCATTGTC
SA-TF31-F	ACAATTTACTATTCTAGTCGAATGGATGAGCTTGCATTCTTAAT	Medtr8g098945
SA-TF31-R	TTGCGGACTCTAGCATGGCCGTTATTGATATTGACACTTATTATCAA
SA-TF32-F	ACAATTTACTATTCTAGTCGAATGGAAGAAGAAGATAGGGA	Medtr1g019110
SA-TF32-R	TTGCGGACTCTAGCATGGCCGTCAACAATCTTCAGGTTTTGG
SA-TF33-F	ACAATTTACTATTCTAGTCGAATGAGAGGTATGGATATTAAGGTT	Medtr1g086510
SA-TF33-R	TTGCGGACTCTAGCATGGCCGTCACGCAAGTAAATTGTATTTT
