# Supplementary material for: Transcriptional Programs and Regulators Underlying Age-Dependent and Dark-Induced Senescence in Medicago truncatula
Source: Cells. 2022 May 6;11(9):1570. doi: 10.3390/cells11091570 (PMC9103780; doi:10.3390/cells11091570)
Supplement: Supplementary file 1 [file cells-11-01570-s001.zip › Supplementary Table S2. List of senescence-induced TFs transiently overexpressed in tobacco leaves.xlsx]

## Sheet: Overexpressed TFs
Name	Treatment	Gene ID	Annotation	AGI	Arabidopsis annotation
SAG-TF1	Age-Dark	Medtr3g092150	Homeobox 7	AT2G46680	AtHB7
SAG-TF2	Age-Dark	Medtr3g450310	MYB-like protein	AT2G02060	putative (tomato CLAUSA)-like MYB transcription factor
SAG-TF4	Age-Dark	Medtr4g108760	NAC domain containing protein 100	AT5G61430	NAC domain containing protein 100/NAC5
SAG-TF5	Age-Dark	Medtr4g081870	NAC-like, activated by AP3/PI	AT1G69490	ANAC029/AtNAP
SAG-TF7	Age-Dark	Medtr1g086790	WRKY DNA-binding protein 23	AT2G47260	AtWRKY23
SAG-TF8	Age-Dark	Medtr4g126350	GATA type zinc finger transcription factor family protein	AT5G56860	AtGNC/AtGATA221
SAG-TF10	Age-Dark	Medtr7g092750	bZIP transcription factor family protein	AT5G06839	AtTGA10/AtbZIP65
SAG-TF11	Age-Dark	Medtr7g020980	related to AP2 6l	AT5G13330	AtERF113/AtRAP2.6L
SAG-TF12	Age-Dark	Medtr8g028565	WRKY family transcription factor	AT4G01250	AtWRKY22
SAG-TF13	Age	Medtr4g094412	WRKY DNA-binding protein 9	AT1G68150	AtWRKY9
SAG-TF14	Age	Medtr4g123040	MYB domain protein 78	AT5G49620	AtMYB78
SAG-TF16	Age	Medtr7g110810	phytochrome interacting factor 3	AT1G09530	AtPIF3/AtbHLH008
SAG-TF17	Age	Medtr3g094690	LOB domain-containing protein 15	AT2G40470	AtASL11/AtLBD15
SAG-TF18	Age	Medtr1g098460	Integrase-type DNA-binding superfamily protein	AT5G61890	AtERF114/AtEBE
SAG-TF19	Age	Medtr1g070020	ethylene response factor 1	AT3G23240	AtERF092/AtERF1b
SAG-TF20	Age	Medtr8g059170	NAC domain transcriptional regulator superfamily protein	AT4G27410	AtANAC072/AtRD26
SAG-TF22	Age	Medtr1g115345	C2H2 and C2HC zinc fingers superfamily protein	AT2G37430	AtZAT11
SAG-TF25	Dark	Medtr3g103570	myb domain protein 84	AT3G49690	AtRAX3/AtMYB84
SAG-TF26	Dark	Medtr2g084315	C2H2-type zinc finger family protein	AT2G28200	AtZAT5
SAG-TF27	Dark	Medtr2g033170	myb domain protein 78	AT5G49620	AtMYB78
SAG-TF28	Dark	Medtr8g026960	homeobox 7	AT2G46680	AtHB7
SAG-TF29	Dark	Medtr7g017880	basic leucine-zipper 42	AT3G30530	AtbZIP42
SAG-TF30	Dark	Medtr1g106730	C2H2 family-salt tolerance zinc finger	AT1G27730	AtSTZ/AtZAT10
SAG-TF31	Dark	Medtr8g098945	WRKY family transcription factor	AT4G23550	AtWRKY29
SAG-TF32	Dark	Medtr1g019110	DREB and EAR motif protein 3	AT2G23340	AtDEAR3/AtERF008
SAG-TF33	Dark	Medtr1g086510	myb domain protein 112	AT1G48000	AtMYB112
